# Supplementary material
Source: MDPI journal article supplement (https://www.mdpi.com/2073-4352/13/4/704)
Supplement: s1 [file s1]

**Crystal structures of 3,3',5,5'-tetrabromo-4,4'-bipyridine and Co(II) coordination polymer based thereon**

**Table S1.** Details of XRD experiments

|                                                                       | <b>1</b>                                                                 | <b>2</b>                                                                        |
|-----------------------------------------------------------------------|--------------------------------------------------------------------------|---------------------------------------------------------------------------------|
| Chemical formula                                                      | C <sub>10</sub> H <sub>4</sub> Br <sub>4</sub> N <sub>2</sub>            | C <sub>12</sub> H <sub>12</sub> Br <sub>4</sub> CoN <sub>4</sub> O <sub>8</sub> |
| $M_r$                                                                 | 471.79                                                                   | 718.83                                                                          |
| Crystal system, space group                                           | Triclinic, $P\bar{1}$                                                    | Monoclinic, $C2/c$                                                              |
| $a, b, c$ (Å)                                                         | 7.8725 (4), 10.9122 (6), 15.6053 (8)                                     | 18.3716 (10), 11.4111 (6), 13.2287 (12)                                         |
| $\alpha, \beta, \gamma$ (°)                                           | 103.034 (2), 96.915 (2), 92.460 (2)                                      | 90, 132.282 (2), 90                                                             |
| $V$ (Å <sup>3</sup> )                                                 | 1293.15 (12)                                                             | 2051.8 (2)                                                                      |
| $Z$                                                                   | 4                                                                        | 4                                                                               |
| $\mu$ (mm <sup>-1</sup> )                                             | 12.42                                                                    | 8.67                                                                            |
| No. of measured, independent and observed [ $I > 2s(I)$ ] reflections | 57634, 7528, 6176                                                        | 23514, 4908, 4079                                                               |
| $R_{\text{int}}$                                                      | 0.097                                                                    | 0.093                                                                           |
| $(\sin \theta/\lambda)_{\text{max}}$ (Å <sup>-1</sup> )               | 0.703                                                                    | 0.854                                                                           |
| Range of $h, k, l$                                                    | $h = -11 \rightarrow 11, k = -15 \rightarrow 15, l = -21 \rightarrow 21$ | $h = -30 \rightarrow 25, k = -17 \rightarrow 19, l = -20 \rightarrow 22$        |
| $R[F^2 > 2s(F^2)], wR(F^2), S$                                        | 0.042, 0.107, 1.04                                                       | 0.032, 0.079, 1.02                                                              |
| No. of reflections                                                    | 7528                                                                     | 4908                                                                            |
| No. of parameters                                                     | 289                                                                      | 139                                                                             |
| $D\rho_{\text{max}}, D\rho_{\text{min}}$ (e Å <sup>-3</sup> )         | 1.66, -1.57                                                              | 1.20, -1.85                                                                     |

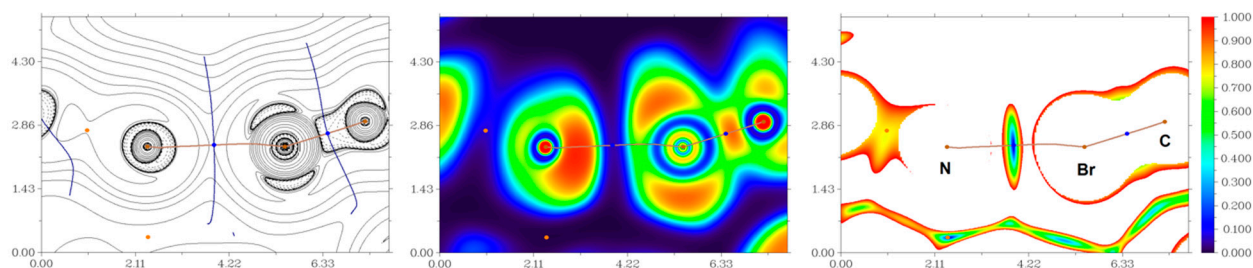

**Figure S1.** Contour line diagram of the Laplacian of electron density distribution  $\nabla^2\rho(\mathbf{r})$ , bond paths, and selected zero-flux surfaces (left panel), visualization of electron localization function

(ELF, center panel), and reduced density gradient (RDG, right panel) analyses for halogen bond Br $\cdots$ N (3.088 Å) in **1**. Bond critical points (3, –1) are shown in blue, nuclear critical points (3, –3) in pale brown, ring critical points (3, +1) in orange, and bond paths are shown as pale brown lines, with length units – Å, and the color scale for the ELF and RDG maps is presented in a.u.

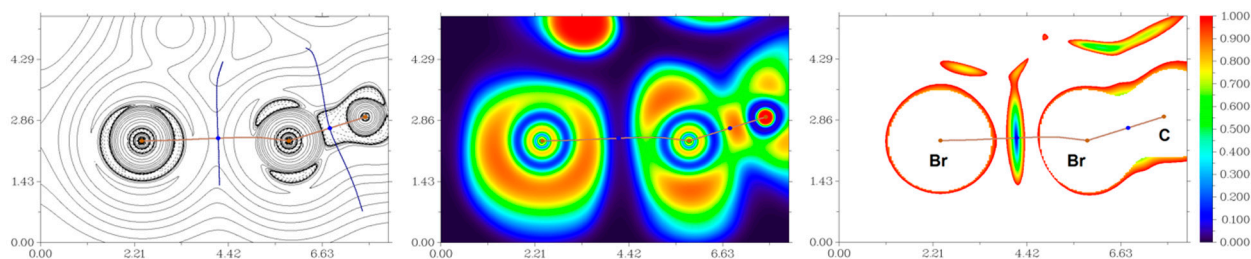

**Figure S2.** Contour line diagram of the Laplacian of electron density distribution  $\nabla^2\rho(\mathbf{r})$ , bond paths, and selected zero-flux surfaces (left panel), visualization of electron localization function (ELF, center panel), and reduced density gradient (RDG, right panel) analyses for halogen bond Br $\cdots$ Br (3.459 Å) in **1**. Bond critical points (3, –1) are shown in blue, nuclear critical points (3, –3) in pale brown, bond paths are shown as pale brown lines, length units – Å, and the color scale for the ELF and RDG maps is presented in a.u.

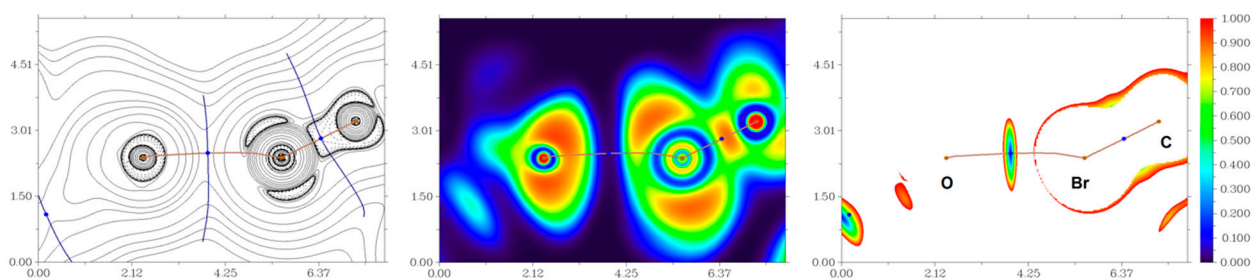

**Figure S3.** Contour line diagram of the Laplacian of electron density distribution  $\nabla^2\rho(\mathbf{r})$ , bond paths, and selected zero-flux surfaces (left panel), visualization of electron localization function (ELF, center panel), and reduced density gradient (RDG, right panel) analyses for halogen bond Br $\cdots$ O (3.146 Å) in **2**. Bond critical points (3, –1) are shown in blue, nuclear critical points (3, –3) in pale brown, bond paths are shown as pale brown lines, length units – Å, and the color scale for the ELF and RDG maps is presented in a.u.

**Table S2.** Cartesian atomic coordinates for model structures.

| Atom                                                     | X         | Y        | Z         |
|----------------------------------------------------------|-----------|----------|-----------|
| <b>1</b> (part with halogen bonds Br $\cdots$ N 3.088 Å) |           |          |           |
| C                                                        | -0.891618 | 6.000634 | 12.558242 |
| C                                                        | -1.102966 | 7.176644 | 13.288986 |
| C                                                        | -1.991819 | 8.139124 | 12.843006 |
| H                                                        | -2.118368 | 8.918256 | 13.372200 |
| N                                                        | -2.676543 | 8.024894 | 11.711484 |
| C                                                        | -2.508025 | 6.898738 | 11.013887 |
| H                                                        | -3.007321 | 6.783766 | 10.214138 |

|    |            |           |           |
|----|------------|-----------|-----------|
| C  | -1.638115  | 5.888530  | 11.399600 |
| C  | 0.099273   | 4.983238  | 12.983128 |
| C  | 1.410801   | 4.986625  | 12.504002 |
| C  | 2.324755   | 4.049932  | 12.942448 |
| H  | 3.212349   | 4.087893  | 12.604844 |
| N  | 2.014606   | 3.094867  | 13.817833 |
| C  | 0.767294   | 3.047447  | 14.266826 |
| H  | 0.528114   | 2.358736  | 14.876161 |
| C  | -0.199733  | 3.958454  | 13.885634 |
| Br | -0.196992  | 7.477031  | 14.913949 |
| Br | -1.518578  | 4.335470  | 10.338138 |
| Br | 1.948551   | 6.265311  | 11.222262 |
| Br | -1.939125  | 3.773570  | 14.608543 |
| C  | 0.324512   | 11.043110 | 10.528734 |
| C  | 1.042581   | 10.674375 | 11.660257 |
| C  | 0.463910   | 10.777229 | 12.916834 |
| H  | 0.970091   | 10.506899 | 13.674367 |
| N  | -0.778537  | 11.242776 | 13.108183 |
| C  | -1.482338  | 11.599621 | 12.026382 |
| H  | -2.363411  | 11.936047 | 12.142909 |
| C  | -0.971515  | 11.493089 | 10.748710 |
| C  | 0.900928   | 10.958199 | 9.160662  |
| C  | 1.672004   | 11.967707 | 8.609214  |
| C  | 2.164920   | 11.866608 | 7.322502  |
| H  | 2.683849   | 12.582114 | 6.973056  |
| N  | 1.940332   | 10.804267 | 6.554092  |
| C  | 1.195690   | 9.812102  | 7.055819  |
| H  | 1.012199   | 9.057014  | 6.509509  |
| C  | 0.679735   | 9.844166  | 8.348557  |
| Br | 2.784878   | 9.945627  | 11.529175 |
| Br | -2.077215  | 11.945809 | 9.278334  |
| Br | 2.013471   | 13.552654 | 9.588862  |
| Br | -0.318376  | 8.390544  | 8.990556  |
| C  | -7.547988  | 11.043110 | 10.528734 |
| C  | -6.829919  | 10.674375 | 11.660257 |
| C  | -7.408590  | 10.777229 | 12.916834 |
| H  | -6.902409  | 10.506899 | 13.674367 |
| N  | -8.651037  | 11.242776 | 13.108183 |
| C  | -9.354838  | 11.599621 | 12.026382 |
| H  | -10.235911 | 11.936047 | 12.142909 |
| C  | -8.844015  | 11.493089 | 10.748710 |
| C  | -6.971572  | 10.958199 | 9.160662  |
| C  | -6.200496  | 11.967707 | 8.609214  |
| C  | -5.707580  | 11.866608 | 7.322502  |
| H  | -5.188651  | 12.582114 | 6.973056  |
| N  | -5.932168  | 10.804267 | 6.554092  |
| C  | -6.676810  | 9.812102  | 7.055819  |
| H  | -6.860301  | 9.057014  | 6.509509  |
| C  | -7.192765  | 9.844166  | 8.348557  |
| Br | -5.087622  | 9.945627  | 11.529175 |
| Br | -9.949715  | 11.945809 | 9.278334  |
| Br | -5.859029  | 13.552654 | 9.588862  |

|                                                             |           |           |           |
|-------------------------------------------------------------|-----------|-----------|-----------|
| Br                                                          | -8.190876 | 8.390544  | 8.990556  |
| <b>1</b> (part with halogen bonds Br...N 3.150 and 3.160 Å) |           |           |           |
| C                                                           | 0.792884  | 0.140967  | 10.528734 |
| C                                                           | 1.510953  | -0.227769 | 11.660257 |
| C                                                           | 0.932283  | -0.124915 | 12.916834 |
| H                                                           | 1.438464  | -0.395245 | 13.674367 |
| N                                                           | -0.310165 | 0.340633  | 13.108183 |
| C                                                           | -1.013965 | 0.697477  | 12.026382 |
| H                                                           | -1.895038 | 1.033903  | 12.142909 |
| C                                                           | -0.503142 | 0.590946  | 10.748710 |
| C                                                           | 1.369301  | 0.056056  | 9.160662  |
| C                                                           | 2.140377  | 1.065563  | 8.609214  |
| C                                                           | 2.633293  | 0.964464  | 7.322502  |
| H                                                           | 3.152221  | 1.679970  | 6.973056  |
| N                                                           | 2.408704  | -0.097876 | 6.554092  |
| C                                                           | 1.664062  | -1.090042 | 7.055819  |
| H                                                           | 1.480571  | -1.845130 | 6.509509  |
| C                                                           | 1.148107  | -1.057978 | 8.348557  |
| Br                                                          | 3.253250  | -0.956517 | 11.529175 |
| Br                                                          | -1.608843 | 1.043666  | 9.278334  |
| Br                                                          | 2.481844  | 2.650510  | 9.588862  |
| Br                                                          | 0.149997  | -2.511600 | 8.990556  |
| C                                                           | 6.416919  | 1.298095  | 2.508635  |
| C                                                           | 6.628266  | 0.122085  | 1.777892  |
| C                                                           | 7.517119  | -0.840395 | 2.223871  |
| H                                                           | 7.643669  | -1.619528 | 1.694677  |
| N                                                           | 8.201843  | -0.726165 | 3.355394  |
| C                                                           | 8.033325  | 0.399991  | 4.052990  |
| H                                                           | 8.532622  | 0.514963  | 4.852740  |
| C                                                           | 7.163415  | 1.410199  | 3.667278  |
| C                                                           | 5.426027  | 2.315491  | 2.083749  |
| C                                                           | 4.114499  | 2.312104  | 2.562876  |
| C                                                           | 3.200545  | 3.248797  | 2.124430  |
| H                                                           | 2.312952  | 3.210836  | 2.462033  |
| N                                                           | 3.510694  | 4.203862  | 1.249044  |
| C                                                           | 4.758007  | 4.251282  | 0.800051  |
| H                                                           | 4.997186  | 4.939993  | 0.190717  |
| C                                                           | 5.725033  | 3.340275  | 1.181243  |
| Br                                                          | 5.722292  | -0.178303 | 0.152929  |
| Br                                                          | 7.043879  | 2.963259  | 4.728740  |
| Br                                                          | 3.576749  | 1.033418  | 3.844615  |
| Br                                                          | 7.464425  | 3.525159  | 0.458334  |
| C                                                           | -3.334409 | -2.305320 | 17.575513 |
| C                                                           | -3.123061 | -3.481330 | 16.844769 |
| C                                                           | -2.234208 | -4.443809 | 17.290749 |
| H                                                           | -2.107659 | -5.222942 | 16.761555 |
| N                                                           | -1.549484 | -4.329580 | 18.422271 |
| C                                                           | -1.718002 | -3.203424 | 19.119868 |
| H                                                           | -1.218705 | -3.088452 | 19.919617 |
| C                                                           | -2.587912 | -2.193216 | 18.734156 |
| C                                                           | -4.325300 | -1.287924 | 17.150627 |
| C                                                           | -5.636828 | -1.291310 | 17.629753 |

|                                                   |           |           |           |
|---------------------------------------------------|-----------|-----------|-----------|
| C                                                 | -6.550782 | -0.354618 | 17.191307 |
| H                                                 | -7.438375 | -0.392579 | 17.528911 |
| N                                                 | -6.240633 | 0.600447  | 16.315922 |
| C                                                 | -4.993320 | 0.647867  | 15.866929 |
| H                                                 | -4.754141 | 1.336578  | 15.257594 |
| C                                                 | -4.026294 | -0.263140 | 16.248121 |
| Br                                                | -4.029035 | -3.781717 | 15.219806 |
| Br                                                | -2.707448 | -0.640155 | 19.795617 |
| Br                                                | -6.174578 | -2.569997 | 18.911493 |
| Br                                                | -2.286902 | -0.078256 | 15.525212 |
| <b>1 (part with halogen bonds Br...Br)</b>        |           |           |           |
| C                                                 | -0.891618 | 6.000634  | 12.558242 |
| C                                                 | -1.102966 | 7.176644  | 13.288986 |
| C                                                 | -1.991819 | 8.139124  | 12.843006 |
| H                                                 | -2.118368 | 8.918256  | 13.372200 |
| N                                                 | -2.676543 | 8.024894  | 11.711484 |
| C                                                 | -2.508025 | 6.898738  | 11.013887 |
| H                                                 | -3.007321 | 6.783766  | 10.214138 |
| C                                                 | -1.638115 | 5.888530  | 11.399600 |
| C                                                 | 0.099273  | 4.983238  | 12.983128 |
| C                                                 | 1.410801  | 4.986625  | 12.504002 |
| C                                                 | 2.324755  | 4.049932  | 12.942448 |
| H                                                 | 3.212349  | 4.087893  | 12.604844 |
| N                                                 | 2.014606  | 3.094867  | 13.817833 |
| C                                                 | 0.767294  | 3.047447  | 14.266826 |
| H                                                 | 0.528114  | 2.358736  | 14.876161 |
| C                                                 | -0.199733 | 3.958454  | 13.885634 |
| Br                                                | -0.196992 | 7.477031  | 14.913949 |
| Br                                                | -1.518578 | 4.335470  | 10.338138 |
| Br                                                | 1.948551  | 6.265311  | 11.222262 |
| Br                                                | -1.939125 | 3.773570  | 14.608543 |
| C                                                 | 0.792884  | 0.140967  | 10.528734 |
| C                                                 | 1.510953  | -0.227769 | 11.660257 |
| C                                                 | 0.932283  | -0.124915 | 12.916834 |
| H                                                 | 1.438464  | -0.395245 | 13.674367 |
| N                                                 | -0.310165 | 0.340633  | 13.108183 |
| C                                                 | -1.013965 | 0.697477  | 12.026382 |
| H                                                 | -1.895038 | 1.033903  | 12.142909 |
| C                                                 | -0.503142 | 0.590946  | 10.748710 |
| C                                                 | 1.369301  | 0.056056  | 9.160662  |
| C                                                 | 2.140377  | 1.065563  | 8.609214  |
| C                                                 | 2.633293  | 0.964464  | 7.322502  |
| H                                                 | 3.152221  | 1.679970  | 6.973056  |
| N                                                 | 2.408704  | -0.097876 | 6.554092  |
| C                                                 | 1.664062  | -1.090042 | 7.055819  |
| H                                                 | 1.480571  | -1.845130 | 6.509509  |
| C                                                 | 1.148107  | -1.057978 | 8.348557  |
| Br                                                | 3.253250  | -0.956517 | 11.529175 |
| Br                                                | -1.608843 | 1.043666  | 9.278334  |
| Br                                                | 2.481844  | 2.650510  | 9.588862  |
| Br                                                | 0.149997  | -2.511600 | 8.990556  |
| <b>2 (part with halogen bonds Br...O 3.146 Å)</b> |           |           |           |

|    |           |           |           |
|----|-----------|-----------|-----------|
| Br | 4.263331  | 4.632678  | 3.379113  |
| Br | 6.448013  | 3.423558  | -0.360363 |
| Co | 6.960798  | 9.691790  | 2.446789  |
| O  | 6.578897  | 9.820050  | 4.505614  |
| O  | 4.906823  | 9.781138  | 2.172063  |
| N  | 6.960798  | 0.480293  | 2.446789  |
| N  | 7.329434  | 9.301188  | 5.378922  |
| N  | 6.960798  | 7.572292  | 2.446789  |
| O  | 7.893777  | 8.211998  | 5.160766  |
| C  | 6.960798  | 3.292673  | 2.446789  |
| O  | 7.491335  | 9.850062  | 6.459522  |
| C  | 6.960798  | 4.777485  | 2.446789  |
| C  | 5.869112  | 6.895956  | 2.825845  |
| H  | 5.096743  | 7.377276  | 3.098613  |
| C  | 6.713820  | 1.167812  | 1.321559  |
| H  | 6.526156  | 0.689230  | 0.522634  |
| C  | 5.837728  | 5.508594  | 2.830054  |
| C  | 6.722384  | 2.556771  | 1.287696  |
| C  | 4.043127  | 10.749599 | 2.777594  |
| H  | 4.392981  | 10.992313 | 3.660396  |
| H  | 3.144618  | 10.370408 | 2.873509  |
| H  | 4.001623  | 11.549174 | 2.211897  |
| H  | 4.530112  | 9.459802  | 1.624668  |
| Br | 9.658266  | 4.632678  | 1.514464  |
| Br | 7.473584  | 3.423558  | 5.253940  |
| C  | 8.052485  | 6.895956  | 2.067732  |
| H  | 8.824854  | 7.377276  | 1.794964  |
| C  | 7.207777  | 1.167812  | 3.572018  |
| H  | 7.395440  | 0.689230  | 4.370943  |
| C  | 8.083869  | 5.508594  | 2.063524  |
| C  | 7.199213  | 2.556771  | 3.605881  |
| O  | 7.342700  | 9.820050  | 0.387963  |
| O  | 9.014774  | 9.781138  | 2.721514  |
| N  | 6.592163  | 9.301188  | -0.485345 |
| O  | 6.027820  | 8.211998  | -0.267189 |
| O  | 6.430262  | 9.850062  | -1.565945 |
| C  | 9.878469  | 10.749599 | 2.115983  |
| H  | 9.528616  | 10.992313 | 1.233181  |
| H  | 10.776979 | 10.370408 | 2.020069  |
| H  | 9.919974  | 11.549174 | 2.681680  |
| H  | 9.391485  | 9.459802  | 3.268910  |
| N  | 6.960798  | 11.891393 | 2.446789  |
| Br | 4.263331  | 16.043778 | 3.379113  |
| Br | 6.448013  | 14.834658 | -0.360363 |
| N  | 6.960798  | 18.983392 | 2.446789  |
| C  | 6.960798  | 14.703773 | 2.446789  |
| C  | 6.960798  | 16.188585 | 2.446789  |
| C  | 5.869112  | 18.307056 | 2.825845  |
| H  | 5.096743  | 18.788376 | 3.098613  |
| C  | 6.713820  | 12.578912 | 1.321559  |
| H  | 6.526156  | 12.100330 | 0.522634  |
| C  | 5.837728  | 16.919694 | 2.830054  |

|    |           |           |            |
|----|-----------|-----------|------------|
| C  | 6.722384  | 13.967871 | 1.287696   |
| Br | 9.658266  | 16.043778 | 1.514464   |
| Br | 7.473584  | 14.834658 | 5.253940   |
| C  | 8.052485  | 18.307056 | 2.067732   |
| H  | 8.824854  | 18.788376 | 1.794964   |
| C  | 7.207777  | 12.578912 | 3.572018   |
| H  | 7.395440  | 12.100330 | 4.370943   |
| C  | 8.083869  | 16.919694 | 2.063524   |
| C  | 7.199213  | 13.967871 | 3.605881   |
| Br | 3.977537  | 10.338228 | -6.408041  |
| Br | 6.162219  | 9.129108  | -10.147517 |
| Co | 6.675005  | 15.397340 | -7.340366  |
| O  | 6.293104  | 15.525600 | -5.281540  |
| O  | 4.621029  | 15.486688 | -7.615091  |
| N  | 6.675005  | 6.185843  | -7.340366  |
| N  | 7.043640  | 15.006738 | -4.408232  |
| N  | 6.675005  | 13.277842 | -7.340366  |
| O  | 7.607984  | 13.917548 | -4.626388  |
| C  | 6.675005  | 8.998223  | -7.340366  |
| O  | 7.205541  | 15.555612 | -3.327632  |
| C  | 6.675005  | 10.483035 | -7.340366  |
| C  | 5.583318  | 12.601506 | -6.961309  |
| H  | 4.810950  | 13.082826 | -6.688541  |
| C  | 6.428026  | 6.873362  | -8.465595  |
| H  | 6.240363  | 6.394780  | -9.264520  |
| C  | 5.551934  | 11.214144 | -6.957101  |
| C  | 6.436590  | 8.262321  | -8.499458  |
| C  | 3.757334  | 16.455149 | -7.009560  |
| H  | 4.107187  | 16.697863 | -6.126759  |
| H  | 2.858824  | 16.075958 | -6.913646  |
| H  | 3.715830  | 17.254724 | -7.575257  |
| H  | 4.244318  | 15.165352 | -8.162487  |
| Br | 9.372472  | 10.338228 | -8.272690  |
| Br | 7.187790  | 9.129108  | -4.533214  |
| C  | 7.766691  | 12.601506 | -7.719422  |
| H  | 8.539060  | 13.082826 | -7.992190  |
| C  | 6.921983  | 6.873362  | -6.215137  |
| H  | 7.109647  | 6.394780  | -5.416211  |
| C  | 7.798076  | 11.214144 | -7.723631  |
| C  | 6.913419  | 8.262321  | -6.181273  |
| O  | 7.056906  | 15.525600 | -9.399192  |
| O  | 8.728980  | 15.486688 | -7.065640  |
| N  | 6.306369  | 15.006738 | -10.272499 |
| O  | 5.742026  | 13.917548 | -10.054344 |
| O  | 6.144468  | 15.555612 | -11.353099 |
| C  | 9.592676  | 16.455149 | -7.671172  |
| H  | 9.242822  | 16.697863 | -8.553973  |
| H  | 10.491186 | 16.075958 | -7.767086  |
| H  | 9.634180  | 17.254724 | -7.105474  |
| H  | 9.105691  | 15.165352 | -6.518245  |
| N  | 6.675005  | 17.596943 | -7.340366  |
| Br | 3.977537  | 21.749328 | -6.408041  |

|                                                   |          |           |            |
|---------------------------------------------------|----------|-----------|------------|
| Br                                                | 6.162219 | 20.540208 | -10.147517 |
| N                                                 | 6.675005 | 24.688942 | -7.340366  |
| C                                                 | 6.675005 | 20.409323 | -7.340366  |
| C                                                 | 6.675005 | 21.894135 | -7.340366  |
| C                                                 | 5.583318 | 24.012606 | -6.961309  |
| H                                                 | 4.810950 | 24.493926 | -6.688541  |
| C                                                 | 6.428026 | 18.284462 | -8.465595  |
| H                                                 | 6.240363 | 17.805880 | -9.264520  |
| C                                                 | 5.551934 | 22.625244 | -6.957101  |
| C                                                 | 6.436590 | 19.673421 | -8.499458  |
| Br                                                | 9.372472 | 21.749328 | -8.272690  |
| Br                                                | 7.187790 | 20.540208 | -4.533214  |
| C                                                 | 7.766691 | 24.012606 | -7.719422  |
| H                                                 | 8.539060 | 24.493926 | -7.992190  |
| C                                                 | 6.921983 | 18.284462 | -6.215137  |
| H                                                 | 7.109647 | 17.805880 | -5.416211  |
| C                                                 | 7.798076 | 22.625244 | -7.723631  |
| C                                                 | 6.913419 | 19.673421 | -6.181273  |
| <b>2 (part with halogen bonds Br...O 3.290 Å)</b> |          |           |            |
| Br                                                | 4.263331 | 4.632678  | 3.379113   |
| Br                                                | 6.448013 | 3.423558  | -0.360363  |
| Co                                                | 6.960798 | 9.691790  | 2.446789   |
| O                                                 | 6.578897 | 9.820050  | 4.505614   |
| O                                                 | 4.906823 | 9.781138  | 2.172063   |
| N                                                 | 6.960798 | 0.480293  | 2.446789   |
| N                                                 | 7.329434 | 9.301188  | 5.378922   |
| N                                                 | 6.960798 | 7.572292  | 2.446789   |
| O                                                 | 7.893777 | 8.211998  | 5.160766   |
| C                                                 | 6.960798 | 3.292673  | 2.446789   |
| O                                                 | 7.491335 | 9.850062  | 6.459522   |
| C                                                 | 6.960798 | 4.777485  | 2.446789   |
| C                                                 | 5.869112 | 6.895956  | 2.825845   |
| H                                                 | 5.096743 | 7.377276  | 3.098613   |
| C                                                 | 6.713820 | 1.167812  | 1.321559   |
| H                                                 | 6.526156 | 0.689230  | 0.522634   |
| C                                                 | 5.837728 | 5.508594  | 2.830054   |
| C                                                 | 6.722384 | 2.556771  | 1.287696   |
| C                                                 | 4.043127 | 10.749599 | 2.777594   |
| H                                                 | 4.392981 | 10.992313 | 3.660396   |
| H                                                 | 3.144618 | 10.370408 | 2.873509   |
| H                                                 | 4.001623 | 11.549174 | 2.211897   |
| H                                                 | 4.530112 | 9.459802  | 1.624668   |
| Br                                                | 9.658266 | 4.632678  | 1.514464   |
| Br                                                | 7.473584 | 3.423558  | 5.253940   |
| C                                                 | 8.052485 | 6.895956  | 2.067732   |
| H                                                 | 8.824854 | 7.377276  | 1.794964   |
| C                                                 | 7.207777 | 1.167812  | 3.572018   |
| H                                                 | 7.395440 | 0.689230  | 4.370943   |
| C                                                 | 8.083869 | 5.508594  | 2.063524   |
| C                                                 | 7.199213 | 2.556771  | 3.605881   |
| O                                                 | 7.342700 | 9.820050  | 0.387963   |
| O                                                 | 9.014774 | 9.781138  | 2.721514   |



|    |           |           |           |
|----|-----------|-----------|-----------|
| N  | 6.592163  | 9.301188  | -0.485345 |
| O  | 6.027820  | 8.211998  | -0.267189 |
| O  | 6.430262  | 9.850062  | -1.565945 |
| C  | 9.878469  | 10.749599 | 2.115983  |
| H  | 9.528616  | 10.992313 | 1.233181  |
| H  | 10.776979 | 10.370408 | 2.020069  |
| H  | 9.919974  | 11.549174 | 2.681680  |
| H  | 9.391485  | 9.459802  | 3.268910  |
| N  | 6.960798  | 11.891393 | 2.446789  |
| Br | 4.263331  | 16.043778 | 3.379113  |
| Br | 6.448013  | 14.834658 | -0.360363 |
| N  | 6.960798  | 18.983392 | 2.446789  |
| C  | 6.960798  | 14.703773 | 2.446789  |
| C  | 6.960798  | 16.188585 | 2.446789  |
| C  | 5.869112  | 18.307056 | 2.825845  |
| H  | 5.096743  | 18.788376 | 3.098613  |
| C  | 6.713820  | 12.578912 | 1.321559  |
| H  | 6.526156  | 12.100330 | 0.522634  |
| C  | 5.837728  | 16.919694 | 2.830054  |
| C  | 6.722384  | 13.967871 | 1.287696  |
| Br | 9.658266  | 16.043778 | 1.514464  |
| Br | 7.473584  | 14.834658 | 5.253940  |
| C  | 8.052485  | 18.307056 | 2.067732  |
| H  | 8.824854  | 18.788376 | 1.794964  |
| C  | 7.207777  | 12.578912 | 3.572018  |
| H  | 7.395440  | 12.100330 | 4.370943  |
| C  | 8.083869  | 16.919694 | 2.063524  |
| C  | 7.199213  | 13.967871 | 3.605881  |
| Br | 14.108269 | 18.189522 | -3.379113 |
| Br | 11.923587 | 19.398642 | 0.360363  |
| Co | 11.410802 | 13.130410 | -2.446789 |
| O  | 11.792703 | 13.002150 | -4.505614 |
| O  | 13.464777 | 13.041062 | -2.172063 |
| N  | 11.410802 | 22.341907 | -2.446789 |
| N  | 11.042166 | 13.521012 | -5.378922 |
| N  | 11.410802 | 15.249908 | -2.446789 |
| O  | 10.477823 | 14.610202 | -5.160766 |
| C  | 11.410802 | 19.529527 | -2.446789 |
| O  | 10.880265 | 12.972138 | -6.459522 |
| C  | 11.410802 | 18.044715 | -2.446789 |
| C  | 12.502488 | 15.926244 | -2.825845 |
| H  | 13.274857 | 15.444924 | -3.098613 |
| C  | 11.657780 | 21.654388 | -1.321559 |
| H  | 11.845444 | 22.132970 | -0.522634 |
| C  | 12.533872 | 17.313606 | -2.830054 |
| C  | 11.649216 | 20.265429 | -1.287696 |
| C  | 14.328473 | 12.072601 | -2.777594 |
| H  | 13.978619 | 11.829887 | -3.660396 |
| H  | 15.226982 | 12.451792 | -2.873509 |
| H  | 14.369977 | 11.273026 | -2.211897 |
| H  | 13.841488 | 13.362398 | -1.624668 |
| Br | 8.713334  | 18.189522 | -1.514464 |

|    |           |           |           |
|----|-----------|-----------|-----------|
| Br | 10.898016 | 19.398642 | -5.253940 |
| C  | 10.319115 | 15.926244 | -2.067732 |
| H  | 9.546746  | 15.444924 | -1.794964 |
| C  | 11.163823 | 21.654388 | -3.572018 |
| H  | 10.976160 | 22.132970 | -4.370943 |
| C  | 10.287731 | 17.313606 | -2.063524 |
| C  | 11.172387 | 20.265429 | -3.605881 |
| O  | 11.028900 | 13.002150 | -0.387963 |
| O  | 9.356826  | 13.041062 | -2.721514 |
| N  | 11.779437 | 13.521012 | 0.485345  |
| O  | 12.343780 | 14.610202 | 0.267189  |
| O  | 11.941338 | 12.972138 | 1.565945  |
| C  | 8.493131  | 12.072601 | -2.115983 |
| H  | 8.842984  | 11.829887 | -1.233181 |
| H  | 7.594621  | 12.451792 | -2.020069 |
| H  | 8.451626  | 11.273026 | -2.681680 |
| H  | 8.980115  | 13.362398 | -3.268910 |
| N  | 11.410802 | 10.930807 | -2.446789 |
| Br | 14.108269 | 6.778422  | -3.379113 |
| Br | 11.923587 | 7.987542  | 0.360363  |
| N  | 11.410802 | 3.838808  | -2.446789 |
| C  | 11.410802 | 8.118427  | -2.446789 |
| C  | 11.410802 | 6.633615  | -2.446789 |
| C  | 12.502488 | 4.515144  | -2.825845 |
| H  | 13.274857 | 4.033824  | -3.098613 |
| C  | 11.657780 | 10.243288 | -1.321559 |
| H  | 11.845444 | 10.721870 | -0.522634 |
| C  | 12.533872 | 5.902506  | -2.830054 |
| C  | 11.649216 | 8.854329  | -1.287696 |
| Br | 8.713334  | 6.778422  | -1.514464 |
| Br | 10.898016 | 7.987542  | -5.253940 |
| C  | 10.319115 | 4.515144  | -2.067732 |
| H  | 9.546746  | 4.033824  | -1.794964 |
| C  | 11.163823 | 10.243288 | -3.572018 |
| H  | 10.976160 | 10.721870 | -4.370943 |
| C  | 10.287731 | 5.902506  | -2.063524 |
| C  | 11.172387 | 8.854329  | -3.605881 |

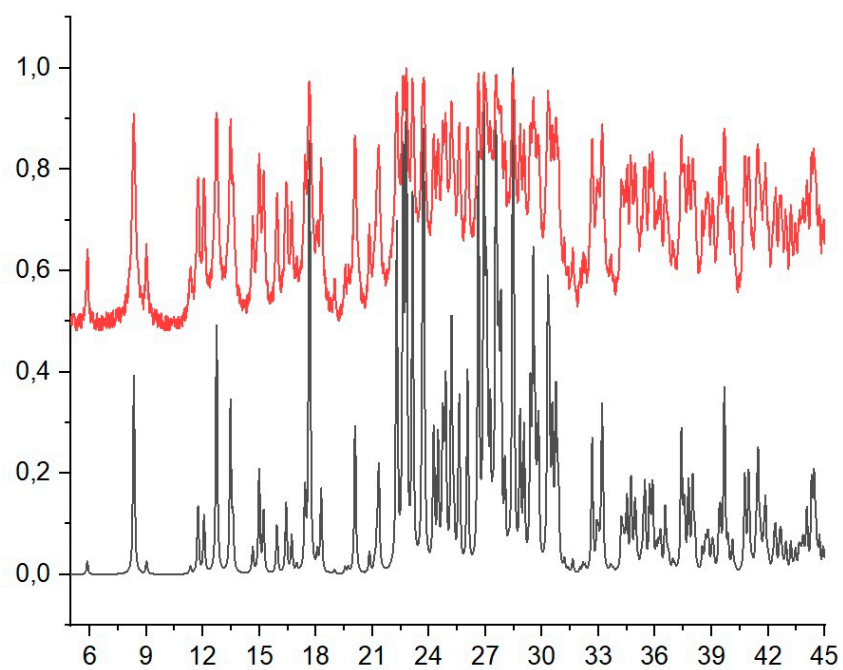

**Figure S4.** PXRD data for **1**

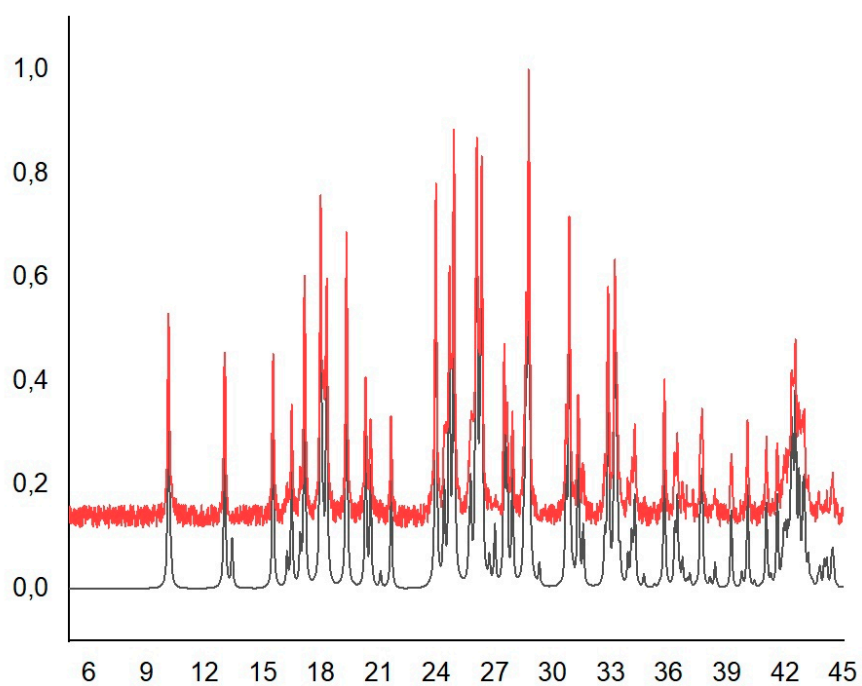

**Figure S5.** PXRD data for **2**
