# Supplementary material
Source: MDPI journal article supplement (https://www.mdpi.com/2073-4352/13/4/704)
Supplement: s1 [file s1]

Archive with 5 entries (5 files):
- 1.cif
- 2.cif
- checkcif 1.pdf
- checkcif 2.pdf
- crystals-2338640-supplementary-XML.pdf
