# Supplementary material
Source: MDPI journal article supplement (https://www.mdpi.com/2073-4352/13/4/704)
Supplement: s1 [file s1 › 1.cif]

 
data_shelx

_publ_contact_author_name        'Litvinov, I. A.'
_publ_contact_author_address     
;
Laboratory of Diffraction Research Methods,
A.E. Arbuzov Institute of Organic and Physical Chemistry,
Kazan Scientific Center, Russian Academy of Sciences,
Arbuzov St., 8, Kazan, 420088, Russian Federation
;
_publ_contact_author_email       litvinov@ioipc.ru
 
_audit_creation_method            'SHELXL-2018/3'
_shelx_SHELXL_version_number      '2018/3'
_chemical_name_systematic    3,5,3',5'- tetrabromo-[4,4']bipyridine
_chemical_name_common      ?
_chemical_melting_point           ?
_chemical_formula_moiety          'C10 H4 Br4 N2' 
_chemical_formula_sum
 'C10 H4 Br4 N2' 
_chemical_formula_weight          471.79

loop_
 _atom_type_symbol
 _atom_type_description
 _atom_type_scat_dispersion_real
 _atom_type_scat_dispersion_imag
 _atom_type_scat_source
 'C'  'C'   0.0033   0.0016
 'International Tables Vol C Tables 4.2.6.8 and 6.1.1.4'
 'H'  'H'   0.0000   0.0000
 'International Tables Vol C Tables 4.2.6.8 and 6.1.1.4'
 'Br'  'Br'  -0.2901   2.4595
 'International Tables Vol C Tables 4.2.6.8 and 6.1.1.4'
 'N'  'N'   0.0061   0.0033
 'International Tables Vol C Tables 4.2.6.8 and 6.1.1.4'
 
_space_group_crystal_system       triclinic
_space_group_IT_number            2
_space_group_name_H-M_alt         'P -1'
_space_group_name_Hall            '-P 1'
 
_shelx_space_group_comment
;
The symmetry employed for this shelxl refinement is uniquely defined
by the following loop, which should always be used as a source of
symmetry information in preference to the above space-group names.
They are only intended as comments.
;
 
loop_
 _space_group_symop_operation_xyz
 'x, y, z'
 '-x, -y, -z'
 
_cell_length_a                    7.8725(4)
_cell_length_b                    10.9122(6)
_cell_length_c                    15.6053(8)
_cell_angle_alpha                 103.034(2)
_cell_angle_beta                  96.915(2)
_cell_angle_gamma                 92.460(2)
_cell_volume                      1293.15(12)
_cell_formula_units_Z             4
_cell_measurement_temperature     100(2)
_cell_measurement_reflns_used      9113
_cell_measurement_theta_min        2.59
_cell_measurement_theta_max       33.29
 
_exptl_crystal_description      prismatic
_exptl_crystal_colour             colorless
_exptl_crystal_density_meas       ?
_exptl_crystal_density_method     ?
_exptl_crystal_density_diffrn     2.423          
_exptl_crystal_F_000              872
_exptl_transmission_factor_min    ?
_exptl_transmission_factor_max    ?
_exptl_crystal_size_max          0.40
_exptl_crystal_size_mid          0.20
_exptl_crystal_size_min          0.15
_exptl_absorpt_coefficient_mu     12.421
_shelx_estimated_absorpt_T_min    ?
_shelx_estimated_absorpt_T_max    ?
_exptl_absorpt_correction_type    multi-scan
_exptl_absorpt_correction_T_min   0.1013  
_exptl_absorpt_correction_T_max  0.7466
_exptl_absorpt_process_details    ?
_exptl_absorpt_special_details    ?
_diffrn_ambient_temperature       100(2)
_diffrn_radiation_wavelength      0.71073
_diffrn_radiation_type            MoK\a
_diffrn_source                    'I\mS DIAMOND'
_diffrn_measurement_device_type   'Bruker D8 QUEST'
_diffrn_measurement_method        '\f and \w scans'
_diffrn_detector_area_resol_mean  ?
_diffrn_reflns_number             57634
_diffrn_reflns_av_unetI/netI      0.0522
_diffrn_reflns_av_R_equivalents   0.0965
_diffrn_reflns_limit_h_min        -11
_diffrn_reflns_limit_h_max        11
_diffrn_reflns_limit_k_min        -15
_diffrn_reflns_limit_k_max        15
_diffrn_reflns_limit_l_min        -21
_diffrn_reflns_limit_l_max        21
_diffrn_reflns_theta_min          2.076
_diffrn_reflns_theta_max          29.999
_diffrn_reflns_theta_full         25.242
_diffrn_measured_fraction_theta_max   0.998
_diffrn_measured_fraction_theta_full  0.998
_diffrn_reflns_Laue_measured_fraction_max    0.998
_diffrn_reflns_Laue_measured_fraction_full   0.998
_diffrn_reflns_point_group_measured_fraction_max   0.998
_diffrn_reflns_point_group_measured_fraction_full  0.998
_reflns_number_total              7528
_reflns_number_gt                 6176
_reflns_threshold_expression      'I > 2\s(I)'
_reflns_Friedel_coverage          0.000
_reflns_Friedel_fraction_max      .
_reflns_Friedel_fraction_full     .
 
_reflns_special_details
;
 Reflections were merged by SHELXL according to the crystal
 class for the calculation of statistics and refinement.
 
 _reflns_Friedel_fraction is defined as the number of unique
 Friedel pairs measured divided by the number that would be
 possible theoretically, ignoring centric projections and
 systematic absences.
;
 
_computing_data_collection       'Bruker APEX2'
_computing_cell_refinement       'Bruker SAINT'
_computing_data_reduction        'Bruker SAINT'
_computing_structure_solution     'SHELXT 2014/5 (Sheldrick, 2014)'
_computing_structure_refinement 'SHELXL-2018/3 (Sheldrick, 2018)'
_computing_molecular_graphics    'Bruker SHELXTL'
_computing_publication_material  'Bruker SHELXTL'
_refine_special_details           ?
_refine_ls_structure_factor_coef  Fsqd
_refine_ls_matrix_type            full
_refine_ls_weighting_scheme       calc
_refine_ls_weighting_details
'w=1/[\s^2^(Fo^2^)+(0.0485P)^2^+3.4364P] where P=(Fo^2^+2Fc^2^)/3'
_atom_sites_solution_primary      ?
_atom_sites_solution_secondary    ?
_atom_sites_solution_hydrogens    geom
_refine_ls_hydrogen_treatment     constr
_refine_ls_extinction_method      none
_refine_ls_extinction_coef        .
_refine_ls_number_reflns          7528
_refine_ls_number_parameters      289
_refine_ls_number_restraints      0
_refine_ls_R_factor_all           0.0551
_refine_ls_R_factor_gt            0.0417
_refine_ls_wR_factor_ref          0.1069
_refine_ls_wR_factor_gt           0.1003
_refine_ls_goodness_of_fit_ref    1.038
_refine_ls_restrained_S_all       1.038
_refine_ls_shift/su_max           0.001
_refine_ls_shift/su_mean          0.000
 
loop_
 _atom_site_label
 _atom_site_type_symbol
 _atom_site_fract_x
 _atom_site_fract_y
 _atom_site_fract_z
 _atom_site_U_iso_or_equiv
 _atom_site_adp_type
 _atom_site_occupancy
 _atom_site_site_symmetry_order  
 _atom_site_calc_flag
 _atom_site_refinement_flags_posn
 _atom_site_refinement_flags_adp
 _atom_site_refinement_flags_occupancy
 _atom_site_disorder_assembly
 _atom_site_disorder_group
C1A C 0.1348(5) 0.8259(4) 0.8335(3) 0.0147(7) Uani 1 1 d . . . . .
C1B C 0.2820(5) 0.2439(4) 0.6988(3) 0.0161(7) Uani 1 1 d . . . . .
C2A C 0.1269(5) 0.9498(4) 0.8820(3) 0.0192(8) Uani 1 1 d . . . . .
C2B C 0.3906(5) 0.2349(4) 0.7739(3) 0.0168(8) Uani 1 1 d . . . . .
C3A C 0.0116(6) 1.0283(4) 0.8524(3) 0.0237(9) Uani 1 1 d . . . . .
H3A H 0.008850 1.111375 0.887522 0.028 Uiso 1 1 calc R U . . .
C3B C 0.3392(6) 0.2719(4) 0.8573(3) 0.0209(8) Uani 1 1 d . . . . .
H3B H 0.415009 0.263721 0.907578 0.025 Uiso 1 1 calc R U . . .
N4A N -0.0954(5) 0.9930(4) 0.7773(3) 0.0242(8) Uani 1 1 d . . . . .
N4B N 0.1872(5) 0.3188(4) 0.8700(3) 0.0232(8) Uani 1 1 d . . . . .
C5A C -0.0921(5) 0.8744(5) 0.7310(3) 0.0231(9) Uani 1 1 d . . . . .
H5A H -0.169861 0.846310 0.677920 0.028 Uiso 1 1 calc R U . . .
C5B C 0.0812(6) 0.3278(4) 0.7982(3) 0.0238(9) Uani 1 1 d . . . . .
H5B H -0.026884 0.361214 0.805934 0.029 Uiso 1 1 calc R U . . .
C6A C 0.0195(5) 0.7902(4) 0.7566(3) 0.0186(8) Uani 1 1 d . . . . .
C6B C 0.1236(5) 0.2900(4) 0.7134(3) 0.0184(8) Uani 1 1 d . . . . .
C7A C 0.2624(5) 0.7419(4) 0.8617(3) 0.0137(7) Uani 1 1 d . . . . .
C7B C 0.3313(5) 0.2061(4) 0.6080(3) 0.0148(7) Uani 1 1 d . . . . .
C8A C 0.4208(5) 0.7317(4) 0.8299(3) 0.0156(7) Uani 1 1 d . . . . .
C8B C 0.4253(6) 0.2866(4) 0.5714(3) 0.0197(8) Uani 1 1 d . . . . .
C9A C 0.5393(5) 0.6554(4) 0.8590(3) 0.0200(8) Uani 1 1 d . . . . .
H9A H 0.646466 0.651477 0.836594 0.024 Uiso 1 1 calc R U . . .
C9B C 0.4653(6) 0.2491(4) 0.4860(3) 0.0211(9) Uani 1 1 d . . . . .
H9B H 0.529131 0.307064 0.462807 0.025 Uiso 1 1 calc R U . . .
N10A N 0.5097(5) 0.5870(4) 0.9171(2) 0.0216(7) Uani 1 1 d . . . . .
N10B N 0.4178(5) 0.1348(4) 0.4350(2) 0.0194(7) Uani 1 1 d . . . . .
C11A C 0.3587(6) 0.5925(4) 0.9469(3) 0.0186(8) Uani 1 1 d . . . . .
H11A H 0.335007 0.542695 0.987342 0.022 Uiso 1 1 calc R U . . .
C11B C 0.3264(5) 0.0548(4) 0.4683(3) 0.0172(8) Uani 1 1 d . . . . .
H11B H 0.289606 -0.026445 0.432042 0.021 Uiso 1 1 calc R U . . .
C12A C 0.2343(5) 0.6677(4) 0.9216(3) 0.0158(7) Uani 1 1 d . . . . .
C12B C 0.2832(5) 0.0861(4) 0.5541(3) 0.0145(7) Uani 1 1 d . . . . .
Br2A Br 0.27148(6) 1.01300(5) 0.98985(3) 0.02848(11) Uani 1 1 d . . . . .
Br2B Br 0.60569(5) 0.16518(4) 0.76520(3) 0.02030(10) Uani 1 1 d . . . . .
Br6A Br 0.00801(7) 0.62446(5) 0.68615(3) 0.03130(12) Uani 1 1 d . . . . .
Br6B Br -0.03959(6) 0.29927(5) 0.61581(3) 0.02662(11) Uani 1 1 d . . . . .
Br8A Br 0.47411(6) 0.82087(5) 0.74483(3) 0.02462(11) Uani 1 1 d . . . . .
Br8B Br 0.49412(7) 0.45347(4) 0.63642(3) 0.02966(12) Uani 1 1 d . . . . .
Br12 Br 0.02474(6) 0.66660(4) 0.96958(3) 0.02255(10) Uani 1 1 d . . . . .
Br13 Br 0.15949(5) -0.03315(4) 0.59671(3) 0.01921(10) Uani 1 1 d . . . . .
 
loop_
 _atom_site_aniso_label
 _atom_site_aniso_U_11
 _atom_site_aniso_U_22
 _atom_site_aniso_U_33
 _atom_site_aniso_U_23
 _atom_site_aniso_U_13
 _atom_site_aniso_U_12
C1A 0.0136(17) 0.0145(18) 0.0185(18) 0.0071(15) 0.0056(14) 0.0011(14)
C1B 0.0185(19) 0.0142(18) 0.0141(18) 0.0009(14) 0.0014(15) -0.0012(14)
C2A 0.0150(18) 0.021(2) 0.023(2) 0.0087(17) 0.0015(16) -0.0002(15)
C2B 0.0163(18) 0.0162(19) 0.0184(19) 0.0047(15) 0.0040(15) -0.0022(14)
C3A 0.022(2) 0.016(2) 0.039(3) 0.0131(19) 0.0118(19) 0.0068(16)
C3B 0.025(2) 0.023(2) 0.0139(19) 0.0030(16) 0.0026(16) -0.0022(17)
N4A 0.0190(18) 0.028(2) 0.033(2) 0.0188(17) 0.0078(16) 0.0080(15)
N4B 0.0239(19) 0.0240(19) 0.0207(18) 0.0006(15) 0.0090(15) -0.0025(15)
C5A 0.0149(19) 0.032(2) 0.027(2) 0.017(2) 0.0021(17) 0.0031(17)
C5B 0.024(2) 0.019(2) 0.027(2) -0.0011(17) 0.0129(18) 0.0002(17)
C6A 0.0192(19) 0.019(2) 0.0201(19) 0.0092(16) 0.0023(16) 0.0002(15)
C6B 0.0157(18) 0.0148(18) 0.024(2) 0.0021(16) 0.0028(16) -0.0001(14)
C7A 0.0142(17) 0.0143(18) 0.0133(17) 0.0050(14) 0.0006(14) 0.0025(14)
C7B 0.0136(17) 0.0193(19) 0.0113(17) 0.0036(15) -0.0004(14) 0.0031(14)
C8A 0.0178(18) 0.0191(19) 0.0114(17) 0.0069(15) 0.0008(14) 0.0027(15)
C8B 0.023(2) 0.019(2) 0.0179(19) 0.0066(16) 0.0006(16) 0.0003(16)
C9A 0.0167(19) 0.025(2) 0.020(2) 0.0094(17) 0.0013(15) 0.0054(16)
C9B 0.025(2) 0.024(2) 0.018(2) 0.0119(17) 0.0068(17) 0.0006(17)
N10A 0.0260(19) 0.0220(19) 0.0178(17) 0.0072(15) 0.0005(14) 0.0073(15)
N10B 0.0188(17) 0.028(2) 0.0134(16) 0.0089(14) 0.0031(13) 0.0039(14)
C11A 0.025(2) 0.0169(19) 0.0150(18) 0.0065(15) 0.0016(16) 0.0051(16)
C11B 0.0172(18) 0.020(2) 0.0142(18) 0.0055(15) 0.0000(15) 0.0019(15)
C12A 0.0202(19) 0.0139(18) 0.0139(17) 0.0043(14) 0.0029(15) 0.0007(14)
C12B 0.0165(18) 0.0143(18) 0.0136(17) 0.0066(14) -0.0006(14) 0.0004(14)
Br2A 0.0281(2) 0.0234(2) 0.0294(2) -0.00044(19) -0.00194(19) 0.00291(18)
Br2B 0.01719(19) 0.0257(2) 0.0182(2) 0.00565(16) 0.00142(15) 0.00361(16)
Br6A 0.0363(3) 0.0245(2) 0.0279(2) 0.00269(19) -0.0095(2) 0.00185(19)
Br6B 0.0207(2) 0.0253(2) 0.0310(2) 0.00243(19) -0.00208(18) 0.00637(17)
Br8A 0.0197(2) 0.0336(2) 0.0288(2) 0.0210(2) 0.00860(17) 0.00488(17)
Br8B 0.0400(3) 0.0184(2) 0.0302(2) 0.00476(18) 0.0083(2) -0.00670(19)
Br12 0.0252(2) 0.0202(2) 0.0277(2) 0.01149(17) 0.01304(17) 0.00362(16)
Br13 0.0225(2) 0.0183(2) 0.01772(19) 0.00600(15) 0.00403(15) -0.00185(15)
 
_geom_special_details
;
 All esds (except the esd in the dihedral angle between two l.s. planes)
 are estimated using the full covariance matrix.  The cell esds are taken
 into account individually in the estimation of esds in distances, angles
 and torsion angles; correlations between esds in cell parameters are only
 used when they are defined by crystal symmetry.  An approximate (isotropic)
 treatment of cell esds is used for estimating esds involving l.s. planes.
;
 
loop_
 _geom_bond_atom_site_label_1
 _geom_bond_atom_site_label_2
 _geom_bond_distance
 _geom_bond_site_symmetry_2
 _geom_bond_publ_flag
C1A C6A 1.383(6) . ?
C1A C2A 1.400(6) . ?
C1A C7A 1.483(5) . ?
C1B C6B 1.389(6) . ?
C1B C2B 1.390(6) . ?
C1B C7B 1.488(5) . ?
C2A C3A 1.384(6) . ?
C2A Br2A 1.884(4) . ?
C2B C3B 1.387(6) . ?
C2B Br2B 1.893(4) . ?
C3A N4A 1.327(7) . ?
C3A H3A 0.9500 . ?
C3B N4B 1.341(6) . ?
C3B H3B 0.9500 . ?
N4A C5A 1.336(6) . ?
N4B C5B 1.339(6) . ?
C5A C6A 1.387(6) . ?
C5A H5A 0.9500 . ?
C5B C6B 1.381(6) . ?
C5B H5B 0.9500 . ?
C6A Br6A 1.885(4) . ?
C6B Br6B 1.895(4) . ?
C7A C8A 1.396(5) . ?
C7A C12A 1.398(5) . ?
C7B C8B 1.385(5) . ?
C7B C12B 1.395(6) . ?
C8A C9A 1.380(6) . ?
C8A Br8A 1.888(4) . ?
C8B C9B 1.381(6) . ?
C8B Br8B 1.894(4) . ?
C9A N10A 1.334(5) . ?
C9A H9A 0.9500 . ?
C9B N10B 1.330(6) . ?
C9B H9B 0.9500 . ?
N10A C11A 1.326(6) . ?
N10B C11B 1.338(5) . ?
C11A C12A 1.382(6) . ?
C11A H11A 0.9500 . ?
C11B C12B 1.392(5) . ?
C11B H11B 0.9500 . ?
C12A Br12 1.892(4) . ?
C12B Br13 1.877(4) . ?
 
loop_
 _geom_angle_atom_site_label_1
 _geom_angle_atom_site_label_2
 _geom_angle_atom_site_label_3
 _geom_angle
 _geom_angle_site_symmetry_1
 _geom_angle_site_symmetry_3
 _geom_angle_publ_flag
C6A C1A C2A 115.1(4) . . ?
C6A C1A C7A 123.1(4) . . ?
C2A C1A C7A 121.8(4) . . ?
C6B C1B C2B 116.1(4) . . ?
C6B C1B C7B 121.7(4) . . ?
C2B C1B C7B 122.3(4) . . ?
C3A C2A C1A 120.8(4) . . ?
C3A C2A Br2A 118.4(4) . . ?
C1A C2A Br2A 120.8(3) . . ?
C3B C2B C1B 120.1(4) . . ?
C3B C2B Br2B 118.4(3) . . ?
C1B C2B Br2B 121.4(3) . . ?
N4A C3A C2A 123.1(4) . . ?
N4A C3A H3A 118.5 . . ?
C2A C3A H3A 118.5 . . ?
N4B C3B C2B 122.8(4) . . ?
N4B C3B H3B 118.6 . . ?
C2B C3B H3B 118.6 . . ?
C3A N4A C5A 116.9(4) . . ?
C5B N4B C3B 117.7(4) . . ?
N4A C5A C6A 123.2(4) . . ?
N4A C5A H5A 118.4 . . ?
C6A C5A H5A 118.4 . . ?
N4B C5B C6B 122.2(4) . . ?
N4B C5B H5B 118.9 . . ?
C6B C5B H5B 118.9 . . ?
C1A C6A C5A 120.8(4) . . ?
C1A C6A Br6A 120.3(3) . . ?
C5A C6A Br6A 118.9(3) . . ?
C5B C6B C1B 121.1(4) . . ?
C5B C6B Br6B 119.0(3) . . ?
C1B C6B Br6B 120.0(3) . . ?
C8A C7A C12A 115.1(4) . . ?
C8A C7A C1A 121.8(3) . . ?
C12A C7A C1A 123.1(3) . . ?
C8B C7B C12B 116.0(4) . . ?
C8B C7B C1B 122.7(4) . . ?
C12B C7B C1B 121.3(3) . . ?
C9A C8A C7A 120.8(4) . . ?
C9A C8A Br8A 119.1(3) . . ?
C7A C8A Br8A 120.1(3) . . ?
C9B C8B C7B 121.0(4) . . ?
C9B C8B Br8B 118.6(3) . . ?
C7B C8B Br8B 120.3(3) . . ?
N10A C9A C8A 122.7(4) . . ?
N10A C9A H9A 118.6 . . ?
C8A C9A H9A 118.6 . . ?
N10B C9B C8B 122.4(4) . . ?
N10B C9B H9B 118.8 . . ?
C8B C9B H9B 118.8 . . ?
C11A N10A C9A 117.8(4) . . ?
C9B N10B C11B 118.0(4) . . ?
N10A C11A C12A 122.8(4) . . ?
N10A C11A H11A 118.6 . . ?
C12A C11A H11A 118.6 . . ?
N10B C11B C12B 122.5(4) . . ?
N10B C11B H11B 118.8 . . ?
C12B C11B H11B 118.8 . . ?
C11A C12A C7A 120.8(4) . . ?
C11A C12A Br12 118.3(3) . . ?
C7A C12A Br12 121.0(3) . . ?
C11B C12B C7B 120.0(4) . . ?
C11B C12B Br13 119.8(3) . . ?
C7B C12B Br13 120.3(3) . . ?
 
_refine_diff_density_max    1.658
_refine_diff_density_min   -1.566
_refine_diff_density_rms    0.190

_shelx_res_file
;
TITL sahap21_1_0m_a.res in P-1
    shelx.res
    created by SHELXL-2018/3 at 10:54:20 on 23-Mar-2023
CELL  0.71073   7.8725  10.9122  15.6053  103.034   96.915   92.460
ZERR     4.00   0.0004   0.0006   0.0008    0.002    0.002    0.002
LATT   1
SFAC  C    H    BR   N
UNIT  40 16 16 8
MERG   2
OMIT    -2.00  60.00
OMIT     2   0   6
OMIT    -2  -3   5
OMIT    -3   0   5
OMIT     8   4   5
OMIT     4   5   9
OMIT     0   2   4
OMIT     1   4  18
OMIT     0   0   1
OMIT     4   6  12
OMIT     3   6   8
OMIT     0   1   0
FMAP   2
PLAN   20
ACTA
BOND   $H
LIST   4
L.S.  15
TEMP  -173.15
WGHT    0.048500    3.436400
FVAR       0.30433
C1A   1    0.134838    0.825948    0.833468    11.00000    0.01356    0.01452 =
         0.01849    0.00708    0.00564    0.00105
C1B   1    0.281976    0.243871    0.698850    11.00000    0.01850    0.01424 =
         0.01405    0.00093    0.00144   -0.00115
C2A   1    0.126934    0.949801    0.882014    11.00000    0.01502    0.02087 =
         0.02317    0.00874    0.00150   -0.00018
C2B   1    0.390572    0.234871    0.773934    11.00000    0.01625    0.01616 =
         0.01838    0.00473    0.00395   -0.00219
C3A   1    0.011568    1.028309    0.852434    11.00000    0.02204    0.01620 =
         0.03853    0.01313    0.01184    0.00678
AFIX  43
H3A   2    0.008850    1.111375    0.887522    11.00000   -1.20000
AFIX   0
C3B   1    0.339236    0.271930    0.857325    11.00000    0.02498    0.02282 =
         0.01393    0.00303    0.00256   -0.00224
AFIX  43
H3B   2    0.415009    0.263721    0.907578    11.00000   -1.20000
AFIX   0
N4A   4   -0.095442    0.992989    0.777347    11.00000    0.01896    0.02809 =
         0.03294    0.01881    0.00778    0.00800
N4B   4    0.187241    0.318838    0.870027    11.00000    0.02388    0.02402 =
         0.02067    0.00055    0.00898   -0.00252
C5A   1   -0.092065    0.874398    0.731005    11.00000    0.01492    0.03170 =
         0.02750    0.01711    0.00210    0.00311
AFIX  43
H5A   2   -0.169861    0.846310    0.677920    11.00000   -1.20000
AFIX   0
C5B   1    0.081162    0.327781    0.798239    11.00000    0.02372    0.01943 =
         0.02747   -0.00114    0.01290    0.00025
AFIX  43
H5B   2   -0.026884    0.361214    0.805934    11.00000   -1.20000
AFIX   0
C6A   1    0.019457    0.790246    0.756588    11.00000    0.01917    0.01854 =
         0.02015    0.00917    0.00231    0.00023
C6B   1    0.123607    0.290022    0.713398    11.00000    0.01566    0.01481 =
         0.02358    0.00211    0.00279   -0.00010
C7A   1    0.262391    0.741891    0.861708    11.00000    0.01416    0.01431 =
         0.01326    0.00500    0.00055    0.00246
C7B   1    0.331310    0.206053    0.607952    11.00000    0.01362    0.01929 =
         0.01128    0.00363   -0.00039    0.00311
C8A   1    0.420792    0.731707    0.829891    11.00000    0.01782    0.01913 =
         0.01138    0.00692    0.00083    0.00266
C8B   1    0.425258    0.286649    0.571352    11.00000    0.02252    0.01920 =
         0.01789    0.00662    0.00065    0.00027
C9A   1    0.539310    0.655403    0.858957    11.00000    0.01671    0.02507 =
         0.02015    0.00945    0.00131    0.00544
AFIX  43
H9A   2    0.646466    0.651477    0.836594    11.00000   -1.20000
AFIX   0
C9B   1    0.465333    0.249113    0.485977    11.00000    0.02550    0.02385 =
         0.01820    0.01189    0.00680    0.00060
AFIX  43
H9B   2    0.529131    0.307064    0.462807    11.00000   -1.20000
AFIX   0
N10A  4    0.509657    0.586952    0.917129    11.00000    0.02603    0.02199 =
         0.01782    0.00722    0.00049    0.00726
N10B  4    0.417841    0.134787    0.435040    11.00000    0.01881    0.02832 =
         0.01343    0.00893    0.00310    0.00391
C11A  1    0.358652    0.592512    0.946913    11.00000    0.02516    0.01685 =
         0.01502    0.00645    0.00164    0.00506
AFIX  43
H11A  2    0.335007    0.542695    0.987342    11.00000   -1.20000
AFIX   0
C11B  1    0.326419    0.054795    0.468324    11.00000    0.01720    0.02036 =
         0.01416    0.00552    0.00001    0.00190
AFIX  43
H11B  2    0.289606   -0.026445    0.432042    11.00000   -1.20000
AFIX   0
C12A  1    0.234278    0.667694    0.921627    11.00000    0.02016    0.01391 =
         0.01391    0.00432    0.00288    0.00072
C12B  1    0.283201    0.086118    0.554117    11.00000    0.01649    0.01429 =
         0.01362    0.00656   -0.00063    0.00040
BR2A  3    0.271484    1.013002    0.989847    11.00000    0.02806    0.02340 =
         0.02944   -0.00044   -0.00194    0.00291
BR2B  3    0.605692    0.165175    0.765200    11.00000    0.01719    0.02566 =
         0.01825    0.00565    0.00142    0.00361
BR6A  3    0.008013    0.624458    0.686152    11.00000    0.03635    0.02455 =
         0.02787    0.00269   -0.00949    0.00185
BR6B  3   -0.039588    0.299274    0.615812    11.00000    0.02068    0.02527 =
         0.03096    0.00243   -0.00208    0.00637
BR8A  3    0.474106    0.820866    0.744831    11.00000    0.01967    0.03363 =
         0.02879    0.02103    0.00860    0.00488
BR8B  3    0.494118    0.453470    0.636422    11.00000    0.03998    0.01844 =
         0.03023    0.00476    0.00829   -0.00670
BR12  3    0.024738    0.666598    0.969585    11.00000    0.02521    0.02017 =
         0.02769    0.01149    0.01304    0.00362
BR13  3    0.159488   -0.033146    0.596712    11.00000    0.02247    0.01833 =
         0.01772    0.00600    0.00403   -0.00185
HKLF    4


REM  sahap21_1_0m_a.res in P-1
REM wR2 = 0.1069, GooF = S = 1.038, Restrained GooF = 1.038 for all data
REM R1 = 0.0417 for 6176 Fo > 4sig(Fo) and 0.0551 for all 7528 data
REM 289 parameters refined using 0 restraints

END

WGHT      0.0485      3.4350

REM Highest difference peak  1.658,  deepest hole -1.566,  1-sigma level  0.190
Q1    1   0.2629 -0.0180  0.6175  11.00000  0.05    1.66
Q2    1   0.3956  0.4414  0.6165  11.00000  0.05    1.48
Q3    1   0.0491 -0.0583  0.5782  11.00000  0.05    1.45
Q4    1   0.5098  0.1437  0.7474  11.00000  0.05    1.44
Q5    1  -0.1406  0.2806  0.5902  11.00000  0.05    1.38
Q6    1   0.5783  0.8404  0.7676  11.00000  0.05    1.35
Q7    1   0.1135  0.6424  0.7041  11.00000  0.05    1.35
Q8    1   0.0700  0.3174  0.6381  11.00000  0.05    1.32
Q9    1  -0.0837  0.6459  0.9445  11.00000  0.05    1.29
Q10   1   0.7013  0.1837  0.7873  11.00000  0.05    1.24
Q11   1  -0.0975  0.6046  0.6671  11.00000  0.05    1.24
Q12   1   0.3700  1.0221  1.0139  11.00000  0.05    1.21
Q13   1   0.1739  0.9952  0.9607  11.00000  0.05    1.17
Q14   1   0.6011  0.2324  0.7763  11.00000  0.05    1.17
Q15   1   0.3748  0.8047  0.7210  11.00000  0.05    1.15
Q16   1   0.6139  0.4722  0.6596  11.00000  0.05    1.12
Q17   1   0.1280  0.6848  0.9921  11.00000  0.05    1.10
Q18   1   0.4600  0.8876  0.7723  11.00000  0.05    1.03
Q19   1   0.0070  0.7381  0.9863  11.00000  0.05    0.99
Q20   1   0.1922 -0.1140  0.5825  11.00000  0.05    0.94
;
_shelx_res_checksum    9905

_shelx_hkl_file
;
  -1   0   0   24.20    2.90
  -1   0   0   21.00    2.70
  -1   0   0   23.10    2.80
  -1   0   0   26.20    2.70
  -1   0   0   22.20    3.30
  -1   0   0   22.70    2.60
  -1   0   0   23.60    2.50
   1   0   0   23.40    2.70
   1   0   0   20.00    3.30
   1   0   0   20.30    2.90
   1   0   0   21.20    2.80
   1   0   0   24.10    3.00
   1   0   0   28.70    3.10
   1   0   0   24.20    2.60
  -2   0   0 4718.13  458.55
  -2   0   0 5360.16  458.35
  -2   0   0 4547.65  458.65
  -2   0   0 5066.29  458.55
  -2   0   0 4113.29  458.45
  -2   0   0 4741.93  458.35
   2   0   0 4050.69  458.65
  -3   0   0  119.69   14.10
  -3   0   0  155.08   14.30
  -3   0   0  135.59   13.50
  -3   0   0  129.89   13.90
  -3   0   0  121.99   15.10
  -3   0   0  132.49   15.00
  -4   0   0 1338.57  145.09
  -4   0   0 1652.23  144.79
  -4   0   0 1344.17  144.09
  -4   0   0 1656.93  144.79
   4   0   0 1442.76  145.29
   4   0   0 1339.87  145.39
  -5   0   0   77.99   13.60
  -5   0   0   88.29   11.90
  -5   0   0   54.69    9.60
  -5   0   0   51.39   14.40
  -5   0   0   69.69   10.70
  -5   0   0   57.69   10.30
  -5   0   0   79.39    9.30
   5   0   0   74.79    8.70
   5   0   0   47.10   12.40
   5   0   0   60.79   11.40
  -6   0   0  424.16   53.49
  -6   0   0  571.74   52.99
  -6   0   0  522.95   51.69
  -6   0   0  489.85   52.19
  -6   0   0  503.15   52.59
  -6   0   0  546.25   52.29
   6   0   0  438.96   52.69
   6   0   0  578.74   51.29
  -7   0   0  217.58   22.10
  -7   0   0  173.58   25.80
  -7   0   0  147.79   22.70
  -7   0   0  198.68   21.50
  -7   0   0  152.58   20.60
  -7   0   0  138.49   31.30
  -7   0   0  142.59   22.80
   7   0   0  139.79   21.60
   7   0   0  197.98   19.00
  -8   0   0  283.67   33.90
  -8   0   0  333.07   34.20
  -8   0   0  313.47   38.90
  -8   0   0  354.46   34.50
  -8   0   0  228.68   36.10
   8   0   0  246.88   33.40
   8   0   0  339.67   31.20
  -9   0   0  235.08   33.50
  -9   0   0  201.68   36.20
  -9   0   0  308.17   33.30
  -9   0   0  307.57   39.60
  -9   0   0  291.27   32.50
   9   0   0  259.57   28.00
 -10   0   0   -4.70   20.50
 -10   0   0    0.90   24.00
 -10   0   0  -21.30   18.00
 -10   0   0   20.70   16.70
 -10   0   0    7.00   16.60
  10   0   0    5.30   10.50
  10   0   0   13.40    6.90
  10   0   0  -11.60    9.40
  10   0   0   13.70    6.10
  10   0   0   -8.80   13.40
 -11   0   0    3.20   24.90
 -11   0   0  -21.60   22.10
 -11   0   0   -6.50   29.00
 -11   0   0   -7.30   20.40
  11   0   0   -5.70   10.80
  11   0   0    0.90    7.80
  11   0   0   21.00    7.40
  11   0   0   -0.60   14.10
 -12   0   0  -11.30   27.70
 -12   0   0   73.09   37.60
 -12   0   0   -9.40   36.30
 -12   0   0   -1.10   28.80
  12   0   0   18.50   10.40
  12   0   0    0.50   17.40
  12   0   0    9.40   15.90
  12   0   0    7.80   12.10
  12   0   0    3.70    9.20
  12  -1   0    5.80    9.60
  12  -1   0    1.50   12.50
  12  -1   0   12.90   16.70
  12  -1   0   33.50   12.10
 -12   1   0   22.20   27.50
 -12   1   0   14.00   37.40
 -12   1   0    2.80   36.80
 -12   1   0   12.70   27.90
  11  -1   0   27.90   12.30
  11  -1   0    7.00   12.90
  11  -1   0   33.20    9.00
  11  -1   0    5.70   15.40
 -11   1   0  132.49   32.90
 -11   1   0   43.90   27.20
 -11   1   0   35.10   21.70
 -11   1   0   66.79   21.90
  10  -1   0   41.50    8.60
  10  -1   0   43.70   12.00
  10  -1   0   48.10    8.60
  10  -1   0   25.20   11.90
 -10   1   0  105.59   27.90
 -10   1   0   -3.00   21.00
 -10   1   0   43.00   57.69
 -10   1   0   40.90   17.80
 -10   1   0   48.40   16.60
 -10   1   0   43.20   17.70
   9  -1   0  765.92   76.39
   9  -1   0  759.32   76.69
  -9   1   0  746.93   99.39
  -9   1   0  809.82   83.79
  -9   1   0  755.62   79.19
   8  -1   0  294.77   36.50
   8  -1   0  376.76   35.40
  -8   1   0  364.66   43.80
  -8   1   0  407.46   38.00
  -8   1   0  331.47   37.40
  -8   1   0  296.17   39.30
  -8   1   0  352.66   38.20
   7  -1   0   -0.80   13.90
   7  -1   0   -3.80    9.60
  -7   1   0   -3.90    8.90
  -7   1   0   -1.50    6.70
  -7   1   0   -9.80   22.50
  -7   1   0   -1.10    8.00
  -7   1   0   -5.60   12.50
  -7   1   0    4.30    8.40
  -7   1   0    4.00   10.00
   6  -1   0 1364.86  122.09
  -6   1   0 1365.36  122.29
  -6   1   0 1274.47  122.39
  -6   1   0 1268.77  122.49
  -6   1   0 1017.90  121.69
  -6   1   0 1318.87  122.09
  -6   1   0 1123.69  124.29
  -6   1   0 1125.79  121.59
  -5   1   0  771.72   79.79
  -5   1   0  812.12   80.09
  -5   1   0  898.31   79.79
  -5   1   0  691.33   81.79
  -5   1   0  823.42   80.09
   4  -1   0 1017.30  117.19
  -4   1   0 1123.29  117.59
  -4   1   0 1187.28  116.29
  -4   1   0 1237.18  115.99
  -4   1   0 1308.87  116.29
  -4   1   0 1209.48  116.09
  -4   1   0 1179.98  116.09
  -4   1   0 1124.79  116.39
   3  -1   0 1804.32  163.28
   3  -1   0 1614.64  164.18
  -3   1   0 1581.74  163.78
  -3   1   0 1741.73  163.18
  -3   1   0 1438.06  164.08
  -3   1   0 1710.93  163.28
  -3   1   0 1504.95  163.38
  -3   1   0 1834.52  163.18
   2  -1   0 3571.14  391.46
   2  -1   0 3974.50  391.16
  -2   1   0 3848.21  391.46
  -2   1   0 4489.45  391.26
  -2   1   0 3431.46  391.26
  -2   1   0 4020.80  391.16
  -2   1   0 4534.05  391.06
  -2   1   0 3916.81  391.46
   1  -1   0  261.57   27.20
   1  -1   0  309.97   27.30
   1  -1   0  269.17   27.30
  -1   1   0  287.27   27.20
  -1   1   0  288.57   27.30
  -1   1   0  292.77   27.90
  -1   1   0  230.48   27.40
  -1   1   0  267.67   27.20
   0  -1   0  274.67   27.40
   0  -1   0  315.27   27.40
   0   1   0  257.97   27.40
   0   1   0  259.77   27.40
  -1  -1   0    5.10    1.60
  -1  -1   0    8.50    1.30
  -1  -1   0    8.40    1.40
  -1  -1   0    6.30    1.80
  -1  -1   0   13.70    3.50
  -1  -1   0    5.30    1.10
  -1  -1   0    8.10    1.40
   1   1   0    7.90    1.20
   1   1   0    8.80    1.30
   1   1   0    6.80    1.30
   1   1   0    7.20    1.20
   1   1   0    9.00    1.40
   1   1   0   10.00    2.60
   1   1   0    7.70    1.40
  -2  -1   0 2864.61  255.97
  -2  -1   0 2633.74  255.97
  -2  -1   0 2559.04  256.17
  -2  -1   0 2710.73  255.97
  -2  -1   0 2675.33  256.17
  -2  -1   0 2294.57  256.07
   2   1   0 2644.54  255.97
   2   1   0 2502.35  256.07
   2   1   0 2501.85  255.87
  -3  -1   0  225.38   24.40
  -3  -1   0  205.68   25.10
  -3  -1   0  235.88   24.10
  -3  -1   0  228.18   24.50
  -3  -1   0  202.08   24.80
  -3  -1   0  247.48   24.40
  -3  -1   0  267.07   25.00
  -3  -1   0  275.57   24.80
   3   1   0  259.57   24.90
   3   1   0  237.18   23.70
  -4  -1   0  711.93   67.39
  -4  -1   0  713.83   67.69
  -4  -1   0  616.24   67.19
  -4  -1   0  671.13   67.19
  -4  -1   0  688.43   67.49
  -4  -1   0  582.94   67.29
  -4  -1   0  615.94   66.69
   4   1   0  715.23   67.59
   4   1   0  749.82   66.89
  -5  -1   0  242.98   25.90
  -5  -1   0  185.28   25.20
  -5  -1   0  221.08   25.30
  -5  -1   0  270.37   25.00
  -5  -1   0  227.98   25.50
  -5  -1   0  194.18   24.50
  -5  -1   0  215.68   28.20
   5   1   0  261.27   25.20
   5   1   0  244.88   23.60
  -6  -1   0   13.80    9.20
  -6  -1   0   10.50    8.90
  -6  -1   0   27.60    9.70
  -6  -1   0   29.20   15.80
  -6  -1   0   14.00    9.00
   6   1   0   19.00    4.60
   6   1   0   31.90    8.10
   6   1   0   -2.30   10.50
  -7  -1   0  703.23   68.99
  -7  -1   0  532.65   73.49
  -7  -1   0  683.33   67.59
  -7  -1   0  624.74   67.39
  -7  -1   0  672.63   68.49
  -7  -1   0  593.84   68.19
   7   1   0  670.23   67.29
   7   1   0  739.23   66.09
   7   1   0  686.53   65.99
  -8  -1   0  198.88   22.40
  -8  -1   0  122.99   35.90
  -8  -1   0  144.89   26.50
   8   1   0  177.38   16.90
   8   1   0  148.49   17.90
   8   1   0  102.19   19.60
   8   1   0  139.79   15.80
  -9  -1   0   13.90   39.80
  -9  -1   0   12.00   18.60
  -9  -1   0   46.30   16.20
  -9  -1   0   40.40   14.50
  -9  -1   0   44.60   14.80
  -9  -1   0   59.79   22.40
   9   1   0   46.40    7.40
   9   1   0   33.90    6.10
   9   1   0   29.90   10.80
   9   1   0   27.40    8.50
 -10  -1   0  -13.70   17.40
 -10  -1   0  -13.50   20.90
 -10  -1   0  -23.20   23.00
 -10  -1   0   11.40   17.20
 -10  -1   0    3.00   18.70
  10   1   0   -6.20    6.50
  10   1   0    0.40   10.60
  10   1   0   -7.00    8.40
  10   1   0   -7.40   14.60
  10   1   0   -5.20    5.30
 -11  -1   0  227.18   32.50
 -11  -1   0  136.89   35.90
 -11  -1   0  211.68   32.40
 -11  -1   0  169.98   30.80
  11   1   0  215.38   21.40
  11   1   0  163.58   21.70
  11   1   0  157.18   24.70
  12  -2   0  342.57   37.60
 -12   2   0  383.86   65.69
 -12   2   0  369.86   52.79
 -12   2   0  294.67   51.39
  11  -2   0    6.70   12.20
  11  -2   0   12.10    9.60
  11  -2   0   -8.10   16.30
  11  -2   0  -19.90   14.40
 -11   2   0   58.09   20.20
 -11   2   0   12.30   19.50
 -11   2   0   14.20   27.10
  10  -2   0  158.98   20.70
  10  -2   0  141.49   23.80
  10  -2   0  172.88   19.50
 -10   2   0  124.19   27.40
 -10   2   0  253.67   64.49
 -10   2   0  172.18   23.80
 -10   2   0  146.99   34.00
 -10   2   0  182.68   28.00
 -10   2   0  193.78   30.00
   9  -2   0    6.10   11.50
   9  -2   0    8.40    7.50
   9  -2   0   -5.40   10.70
   9  -2   0    0.40    4.80
   9  -2   0  -20.50   15.70
  -9   2   0   -3.90   15.40
  -9   2   0   -6.60   20.70
  -9   2   0   26.60   13.80
  -9   2   0   21.30   22.40
   8  -2   0  223.28   24.00
   8  -2   0  241.78   26.10
  -8   2   0  254.17   25.40
  -8   2   0  172.58   33.10
  -8   2   0  198.88   26.20
  -8   2   0  174.18   28.00
  -8   2   0  258.07   27.60
   7  -2   0  261.67   25.30
   7  -2   0  261.27   26.50
  -7   2   0  187.48   27.30
  -7   2   0  256.87   33.40
  -7   2   0  222.88   25.50
  -7   2   0  269.97   25.80
  -7   2   0  251.17   26.40
  -7   2   0  222.98   25.70
   6  -2   0  633.74   58.19
  -6   2   0  599.44   58.89
  -6   2   0  647.54   57.99
  -6   2   0  637.44   58.09
  -6   2   0  600.14   58.59
  -6   2   0  476.25   62.69
  -6   2   0  503.95   58.69
  -6   2   0  510.95   58.59
   5  -2   0   13.70   11.00
   5  -2   0   40.60    6.30
   5  -2   0   26.10   11.10
   5  -2   0   42.20    6.00
  -5   2   0   33.40    5.60
  -5   2   0   40.70    7.50
  -5   2   0   21.90   12.40
  -5   2   0   34.70   14.20
  -5   2   0   38.40    6.20
  -5   2   0   31.30    7.80
  -5   2   0   34.70    6.60
   4  -2   0 1681.33  149.29
   4  -2   0 1621.64  149.29
   4  -2   0 1326.77  150.28
   4  -2   0 1454.85  149.49
  -4   2   0 1384.16  149.99
  -4   2   0 1672.93  149.49
  -4   2   0 1416.86  149.09
  -4   2   0 1581.44  149.39
  -4   2   0 1469.65  149.19
   3  -2   0 1354.06  157.38
   3  -2   0 1604.44  156.98
   3  -2   0 1414.16  157.58
  -3   2   0 1689.63  156.88
  -3   2   0 1699.13  156.98
  -3   2   0 1684.33  157.08
  -3   2   0 1772.52  157.98
  -3   2   0 1519.85  157.28
   2  -2   0  674.23   78.29
   2  -2   0  772.12   77.99
  -2   2   0  809.62   77.89
  -2   2   0  831.92   77.89
  -2   2   0  889.61   79.19
  -2   2   0  705.03   78.19
  -2   2   0  851.71   78.09
   1  -2   0   70.59    8.00
   1  -2   0   73.69    7.70
  -1   2   0   71.49    8.00
  -1   2   0   76.89    7.60
  -1   2   0   84.59    7.70
  -1   2   0   79.79    7.90
   0  -2   0  320.17   30.40
   0  -2   0  306.17   30.30
   0   2   0  278.17   30.40
   0   2   0  321.17   30.50
   0   2   0  325.27   30.40
   0   2   0  284.77   30.50
   0   2   0  310.97   30.40
  -1  -2   0    6.30    1.00
  -1  -2   0    3.70    1.30
  -1  -2   0    3.60    4.60
  -1  -2   0   -3.70    5.10
  -1  -2   0    4.60    1.70
   1   2   0    2.10    1.20
   1   2   0    4.40    0.70
   1   2   0    3.50    0.70
   1   2   0    6.10    1.20
   1   2   0    2.70    4.70
   1   2   0    3.70    1.00
  -2  -2   0 1840.12  195.88
  -2  -2   0 2134.59  196.88
   2   2   0 2118.29  195.88
   2   2   0 1866.21  196.38
  -3  -2   0  295.27   31.80
  -3  -2   0  266.47   32.50
  -3  -2   0  361.96   31.80
  -3  -2   0  313.67   31.70
  -3  -2   0  296.47   32.70
  -3  -2   0  299.97   31.80
  -3  -2   0  348.37   33.30
  -3  -2   0  268.07   32.30
   3   2   0  356.36   31.60
   3   2   0  333.47   31.40
  -4  -2   0 1223.28  117.19
  -4  -2   0 1087.99  117.49
  -4  -2   0 1116.79  117.59
  -4  -2   0 1049.40  117.29
  -4  -2   0 1157.68  117.99
  -4  -2   0 1083.99  117.29
   4   2   0 1176.38  116.79
   4   2   0 1296.47  116.79
   4   2   0 1349.16  116.89
   4   2   0 1269.47  117.09
  -5  -2   0 1219.68  142.49
  -5  -2   0 1597.24  142.79
  -5  -2   0 1540.15  142.59
  -5  -2   0 1242.98  142.89
  -5  -2   0 1458.85  142.49
  -5  -2   0 1262.67  142.89
   5   2   0 1616.74  141.89
   5   2   0 1503.45  142.19
   5   2   0 1578.74  141.89
   5   2   0 1383.66  141.49
   5   2   0 1377.56  141.69
  -6  -2   0   58.69   11.60
  -6  -2   0   48.80   12.70
  -6  -2   0   77.19   13.40
  -6  -2   0   79.49   13.10
  -6  -2   0   67.79   16.70
  -6  -2   0   72.89   12.10
  -6  -2   0   56.19   10.40
   6   2   0   39.70   12.20
   6   2   0   64.09    8.70
   6   2   0   88.19   11.90
   6   2   0   77.89    8.10
  -7  -2   0    4.60   24.20
  -7  -2   0    4.20    9.50
  -7  -2   0   31.50   10.70
  -7  -2   0    4.50   12.40
  -7  -2   0   -1.60   11.90
  -7  -2   0   14.90   11.80
  -7  -2   0   -0.30   11.70
   7   2   0   10.90    3.20
   7   2   0    1.70   10.70
   7   2   0    7.90    4.70
  -8  -2   0   13.30   14.50
  -8  -2   0   28.50   14.70
  -8  -2   0   25.40   11.90
  -8  -2   0   22.30   15.10
  -8  -2   0   26.30   13.40
   8   2   0   26.40    6.00
   8   2   0   16.10    4.10
   8   2   0   26.00    9.00
   8   2   0    4.00   11.50
   8   2   0   21.40    6.40
  -9  -2   0   73.49   18.40
  -9  -2   0   78.79   21.90
  -9  -2   0   83.39   18.20
  -9  -2   0   38.40   20.90
  -9  -2   0   90.09   25.80
  -9  -2   0   85.19   19.20
   9   2   0   71.99   13.30
   9   2   0   78.29   12.40
   9   2   0   92.69   10.40
   9   2   0   77.09   11.50
 -10  -2   0  113.29   26.20
 -10  -2   0  177.48   27.10
 -10  -2   0  228.88   40.00
 -10  -2   0  174.58   29.20
  10   2   0  148.49   22.40
  10   2   0  205.88   19.70
  10   2   0  181.78   19.20
  10   2   0  168.88   19.90
 -11  -2   0   42.50   41.90
 -11  -2   0   38.10   29.10
 -11  -2   0   49.10   27.20
  11   2   0   39.90   10.70
  11   2   0   15.90   13.80
  11   2   0   75.29   14.60
  11   2   0   31.50   11.60
  12  -3   0  -10.70   13.20
  12  -3   0   -5.60    9.90
  11  -3   0   57.49   10.70
  11  -3   0   12.30   18.70
 -11   3   0  103.89   20.60
 -11   3   0   59.79   34.00
 -11   3   0   60.29   28.10
  10  -3   0   72.29   16.60
  10  -3   0   84.99   20.10
 -10   3   0  103.09   54.29
 -10   3   0  128.99   24.30
 -10   3   0  107.19   20.80
 -10   3   0  139.89   32.50
 -10   3   0  114.39   18.30
   9  -3   0   20.00    9.00
   9  -3   0   14.70   12.60
   9  -3   0  -16.70   18.20
   9  -3   0    1.60   12.80
  -9   3   0  -52.29   41.80
  -9   3   0    5.40   24.60
  -9   3   0   19.20   13.60
  -9   3   0   21.10   15.10
  -9   3   0   17.10   15.70
   8  -3   0    1.80   11.20
   8  -3   0   31.60    9.90
   8  -3   0  -16.80   17.80
   8  -3   0   21.70    7.50
  -8   3   0   11.80    7.50
  -8   3   0   21.40    8.70
  -8   3   0   33.20    7.80
  -8   3   0   24.00   10.10
  -8   3   0  -22.40   30.60
  -8   3   0    1.50   19.80
   7  -3   0  579.64   58.59
   7  -3   0  609.84   57.79
  -7   3   0  628.74   58.89
  -7   3   0  552.74   59.19
  -7   3   0  621.74   58.09
  -7   3   0  564.84   58.89
  -7   3   0  462.75   65.59
  -7   3   0  611.14   57.89
  -7   3   0  503.95   59.69
   6  -3   0  102.89   11.80
   6  -3   0   66.09   17.10
   6  -3   0   78.09   10.60
  -6   3   0   68.69   19.90
  -6   3   0   77.29   10.70
  -6   3   0  109.29   13.00
  -6   3   0   95.79   12.20
  -6   3   0   73.39   13.20
  -6   3   0   84.39   10.40
   5  -3   0 1203.98  128.09
   5  -3   0 1212.08  128.39
   5  -3   0 1194.88  129.99
   5  -3   0 1338.77  127.89
  -5   3   0 1364.16  129.49
  -5   3   0 1249.68  128.09
  -5   3   0 1409.06  127.99
  -5   3   0 1387.36  127.89
   4  -3   0 1078.39  110.59
   4  -3   0 1100.99  109.79
   4  -3   0 1097.29  109.99
   4  -3   0  975.40  110.99
  -4   3   0 1164.78  109.89
  -4   3   0 1236.58  111.59
  -4   3   0 1106.09  109.99
  -4   3   0 1146.59  110.19
   3  -3   0 1200.58  125.99
   3  -3   0 1338.27  125.49
  -3   3   0 1334.07  125.19
  -3   3   0 1194.08  125.49
  -3   3   0 1373.76  125.29
  -3   3   0 1179.88  125.79
   2  -3   0  259.17   24.60
  -2   3   0  243.88   25.00
  -2   3   0  271.07   24.80
  -2   3   0  230.38   27.20
  -2   3   0  243.28   24.30
  -2   3   0  222.98   24.40
  -1   3   0 7865.71  717.33
  -1   3   0 7104.59  718.03
  -1   3   0 6755.62  717.53
  -1   3   0 7215.98  717.53
  -1   3   0 7504.85  717.43
   0  -3   0 2027.00  192.98
   0  -3   0 1988.80  192.88
   0   3   0 1997.20  193.08
   0   3   0 1854.31  192.98
   0   3   0 1977.00  192.98
   0   3   0 2074.69  192.98
   0   3   0 1791.02  193.18
  -1  -3   0 9482.25  938.11
   1   3   0 9999.00  939.31
   1   3   0 9496.85  937.71
   1   3   0 9147.18  937.81
  -2  -3   0   50.89    7.40
  -2  -3   0   34.60    5.10
  -2  -3   0   25.40    9.50
  -2  -3   0   37.20    8.80
   2   3   0   36.00    4.90
   2   3   0   40.20    4.20
   2   3   0   41.80    4.50
   2   3   0   30.80    7.00
   2   3   0   47.30    5.00
   2   3   0   36.60    4.20
   2   3   0   42.90    4.50
  -3  -3   0  901.41   98.49
  -3  -3   0  997.70   99.39
   3   3   0 1118.89   97.59
   3   3   0  935.91   97.59
  -4  -3   0  161.28   18.20
  -4  -3   0  149.19   19.40
  -4  -3   0  155.68   18.00
  -4  -3   0  151.18   18.10
  -4  -3   0  176.48   18.90
   4   3   0  164.08   16.70
   4   3   0  174.18   16.40
   4   3   0  174.48   17.10
   4   3   0  153.08   16.60
   4   3   0  148.49   16.40
  -5  -3   0   29.00   11.20
  -5  -3   0   21.80    7.30
  -5  -3   0   60.49    9.80
  -5  -3   0   37.60    9.20
  -5  -3   0   20.40    8.80
  -5  -3   0   35.50    9.20
  -5  -3   0   44.30    9.00
   5   3   0   39.20    6.00
   5   3   0   35.20    6.20
   5   3   0   38.10    4.80
   5   3   0   50.09    7.50
   5   3   0   26.50    8.70
  -6  -3   0   46.90   12.80
  -6  -3   0   77.89   13.40
  -6  -3   0   34.30   13.50
  -6  -3   0   39.80   12.90
  -6  -3   0   60.09   11.80
   6   3   0   74.29    8.50
   6   3   0   63.09    7.50
   6   3   0   75.99   10.50
   6   3   0   64.29    8.00
  -7  -3   0  367.16   45.60
  -7  -3   0  401.36   45.90
   7   3   0  417.56   42.20
   7   3   0  391.76   40.60
   7   3   0  422.36   41.30
   7   3   0  428.16   41.00
  -8  -3   0   11.50   17.60
  -8  -3   0  -28.80   21.20
  -8  -3   0    2.70   15.60
  -8  -3   0   16.40   12.90
  -8  -3   0  -11.70   15.80
   8   3   0   16.30    8.50
   8   3   0    5.30    5.10
   8   3   0    3.80    3.60
   8   3   0   -4.20   10.30
   8   3   0    5.10    5.40
  -9  -3   0  -21.10   19.60
  -9  -3   0   -4.60   24.90
  -9  -3   0   -4.00   16.00
  -9  -3   0  -12.50   17.30
  -9  -3   0   -1.40   18.40
   9   3   0    0.70    4.00
   9   3   0    1.00    5.80
   9   3   0   -5.70   10.70
   9   3   0   -3.30    8.70
   9   3   0   -5.20    5.70
   9   3   0   -0.30    4.60
 -10  -3   0  116.09   24.80
 -10  -3   0  100.69   25.00
 -10  -3   0   27.00   25.20
 -10  -3   0  109.19   38.10
 -10  -3   0  133.79   23.30
  10   3   0   86.99   12.70
  10   3   0  104.79   12.10
  10   3   0   66.69   11.70
  10   3   0   90.69   16.90
  10   3   0   97.29   12.10
 -11  -3   0  -23.30   24.60
 -11  -3   0   19.20   43.10
 -11  -3   0  -31.00   26.60
 -11  -3   0  -15.30   28.30
  11   3   0    6.10    6.50
  11   3   0   -3.00    7.70
  11   3   0   -7.60   11.00
  11   3   0    6.60    7.40
  11  -4   0   -1.00   18.60
  11  -4   0   44.80   14.70
  11  -4   0   26.00    8.70
  11  -4   0  -26.60   20.40
 -11   4   0    2.70   75.89
 -11   4   0   14.20   20.10
 -11   4   0  -20.90   35.70
 -11   4   0   12.30   18.00
  10  -4   0  277.87   38.90
  10  -4   0  254.07   37.70
 -10   4   0  390.36   36.90
 -10   4   0  359.66   57.99
   9  -4   0  221.88   24.10
   9  -4   0  191.88   26.90
  -9   4   0   88.39   45.30
  -9   4   0  202.28   26.70
  -9   4   0  204.88   39.40
   8  -4   0  366.56   38.90
   8  -4   0  377.56   36.90
  -8   4   0  345.17   39.40
  -8   4   0  330.17   39.30
  -8   4   0  364.96   36.70
  -8   4   0  283.77   48.90
   7  -4   0  224.88   23.20
   7  -4   0  234.58   24.50
   7  -4   0  155.88   33.80
  -7   4   0  226.38   28.40
  -7   4   0  213.18   22.70
  -7   4   0  188.58   31.40
  -7   4   0  217.68   25.30
  -7   4   0  183.58   33.20
  -7   4   0  231.58   24.70
   6  -4   0  460.45   44.60
   6  -4   0  387.86   48.80
   6  -4   0  428.96   43.80
   6  -4   0  407.16   44.70
  -6   4   0  477.75   47.60
  -6   4   0  472.95   44.30
  -6   4   0  403.16   43.70
  -6   4   0  454.05   44.70
   5  -4   0  608.74   67.09
   5  -4   0  688.73   66.49
   5  -4   0  632.34   68.59
  -5   4   0  685.43   66.69
  -5   4   0  623.84   66.09
  -5   4   0  753.62   66.19
   4  -4   0  325.07   31.70
   4  -4   0  323.97   33.10
   4  -4   0  323.37   31.50
   4  -4   0  292.57   33.30
  -4   4   0  280.87   31.20
  -4   4   0  324.77   31.90
  -4   4   0  327.27   31.30
   3  -4   0  396.36   38.50
   3  -4   0  393.06   38.40
  -3   4   0  411.36   38.70
  -3   4   0  361.06   38.30
  -3   4   0  370.16   38.20
   2  -4   0 4658.33  471.65
   2  -4   0 4644.84  471.95
   2  -4   0 4845.92  471.55
  -2   4   0 5010.00  471.45
  -2   4   0 4956.40  473.15
  -2   4   0 4631.74  471.95
  -2   4   0 4906.11  471.55
  -2   4   0 4672.53  471.85
   1  -4   0   32.40    5.00
   1  -4   0   16.60   13.70
   1  -4   0   37.30    4.40
   1  -4   0   44.30    4.90
  -1   4   0   46.20    8.00
  -1   4   0   31.30    6.30
  -1   4   0   30.90    5.10
  -1   4   0   34.30    4.60
  -1   4   0   28.40    4.90
  -1   4   0   47.70    5.70
   0  -4   0  106.89   10.70
   0  -4   0  104.29   10.40
   0  -4   0  115.69   11.30
   0   4   0  122.79   11.10
   0   4   0   93.99   10.70
   0   4   0   84.79   10.70
   0   4   0  100.89   10.70
   0   4   0  105.09   10.80
   0   4   0   87.89   11.80
  -1  -4   0  334.27   33.00
  -1  -4   0  315.77   31.20
   1   4   0  301.77   31.10
   1   4   0  329.17   31.20
   1   4   0  302.57   31.10
   1   4   0  295.37   30.90
  -2  -4   0    3.70    2.60
  -2  -4   0    4.40    5.00
  -2  -4   0   -2.70    3.30
  -2  -4   0    3.80    4.00
  -2  -4   0   -2.60    9.20
  -2  -4   0   -5.10    9.20
   2   4   0    0.50    2.30
   2   4   0    3.30    1.10
   2   4   0    2.80    6.80
   2   4   0    1.40    1.70
   2   4   0    4.20    1.80
  -3  -4   0  417.46   41.00
   3   4   0  375.66   40.60
   3   4   0  465.15   42.40
   3   4   0  410.66   40.70
   3   4   0  387.66   40.40
  -4  -4   0  140.49   16.10
  -4  -4   0  135.89   20.60
   4   4   0  141.89   14.10
   4   4   0  136.99   14.00
   4   4   0  135.19   15.30
   4   4   0  118.59   14.20
   4   4   0  134.19   14.10
   4   4   0  145.79   14.20
  -5  -4   0  387.96   42.30
  -5  -4   0  404.76   42.30
   5   4   0  356.96   40.60
   5   4   0  434.86   40.40
   5   4   0  368.26   40.20
   5   4   0  422.56   40.10
   5   4   0  440.26   40.40
  -6  -4   0  134.89   18.70
  -6  -4   0  105.39   17.00
  -6  -4   0   64.89   16.10
  -6  -4   0  115.19   17.60
   6   4   0  126.09   12.00
   6   4   0  102.49   12.90
   6   4   0   96.29   12.40
   6   4   0  100.69   11.80
   6   4   0  108.39   11.90
   6   4   0  104.09   11.00
   6   4   0   69.99   15.60
  -7  -4   0  284.97   40.60
  -7  -4   0  415.26   39.70
  -7  -4   0  330.07   40.80
   7   4   0  353.56   33.80
   7   4   0  358.06   35.30
   7   4   0  353.96   34.30
   7   4   0  311.87   33.90
   7   4   0  311.37   34.60
  -8  -4   0   72.49   19.20
  -8  -4   0   55.69   19.80
  -8  -4   0   46.60   20.70
  -8  -4   0   40.00   21.10
   8   4   0   70.29   13.30
   8   4   0   72.09    8.70
   8   4   0   79.69   10.90
  -9  -4   0   48.20   19.30
  -9  -4   0   12.90   21.30
  -9  -4   0   -1.80   26.60
  -9  -4   0   23.60   18.70
  -9  -4   0   19.10   21.10
   9   4   0   14.00    6.40
   9   4   0   15.20    5.70
   9   4   0    8.70    8.70
   9   4   0   18.90    5.20
   9   4   0   13.00    4.40
   9   4   0    2.00   10.20
 -10  -4   0   13.20   25.40
 -10  -4   0  -13.60   26.20
 -10  -4   0   34.20   25.30
 -10  -4   0   40.10   39.30
  10   4   0    7.90    5.40
  10   4   0   -5.10    6.70
  10   4   0   -2.30    6.50
  10   4   0   -0.50    9.90
  10   4   0    2.40    5.50
 -11  -4   0   30.70   31.20
 -11  -4   0   30.20   30.90
 -11  -4   0   27.30   34.00
  11   4   0    9.40    6.80
  11   4   0   26.60    8.20
  11   4   0   20.80   11.70
  11   4   0   16.40    7.90
  11   4   0    8.20    8.20
  11  -5   0  428.36   44.30
 -11   5   0  445.16   49.40
 -11   5   0  372.46   53.09
 -11   5   0  430.46   76.49
  10  -5   0    9.10   14.10
  10  -5   0  -43.80   23.40
  10  -5   0   13.50   18.20
 -10   5   0   24.30   17.90
 -10   5   0   22.60   28.40
 -10   5   0    6.00   56.59
 -10   5   0   22.90   35.80
 -10   5   0    8.60   11.90
   9  -5   0   10.60   16.10
   9  -5   0   24.30   16.10
   9  -5   0   38.40   15.80
   9  -5   0  -33.00   23.30
  -9   5   0    8.10   34.20
  -9   5   0   -7.40   16.10
  -9   5   0   24.50    8.50
  -9   5   0   31.50   14.40
  -9   5   0   32.80   18.80
  -9   5   0  -67.39   42.20
   8  -5   0  192.18   26.80
   8  -5   0  157.68   31.80
   8  -5   0  233.18   24.50
  -8   5   0  192.58   31.10
  -8   5   0  246.38   23.20
  -8   5   0  223.78   27.30
  -8   5   0  182.28   40.40
   7  -5   0   59.19   11.40
   7  -5   0   40.40   18.80
   7  -5   0   25.40   18.40
   7  -5   0   67.89   11.20
   7  -5   0   71.89   11.00
  -7   5   0   57.89   29.80
  -7   5   0   32.80   23.10
  -7   5   0   78.59   11.30
  -7   5   0   62.59    9.40
  -7   5   0   72.69   13.40
  -7   5   0   79.89   16.80
   6  -5   0  164.28   16.00
   6  -5   0  140.69   24.30
   6  -5   0  117.49   24.20
   6  -5   0  145.69   16.80
   6  -5   0  157.08   18.50
  -6   5   0  161.48   17.20
  -6   5   0  120.29   15.40
  -6   5   0  103.59   29.20
  -6   5   0  108.79   24.30
   5  -5   0  224.58   26.40
   5  -5   0  210.08   22.60
   5  -5   0  228.18   22.40
  -5   5   0  235.98   22.10
  -5   5   0  137.09   31.80
  -5   5   0  171.78   27.60
  -5   5   0  226.28   22.90
   4  -5   0  136.59   15.90
   4  -5   0  164.38   20.00
   4  -5   0  169.18   15.90
   4  -5   0  137.29   17.70
  -4   5   0  131.49   16.50
  -4   5   0  170.78   15.40
  -4   5   0  143.39   15.20
  -4   5   0  135.49   21.70
   3  -5   0    6.70    3.00
   3  -5   0   -3.40   10.70
   3  -5   0    6.90    4.40
  -3   5   0   11.30   11.40
  -3   5   0   12.90    7.20
  -3   5   0    2.80    3.50
  -3   5   0   20.60   13.10
  -3   5   0   12.00    2.50
  -3   5   0    8.50    1.90
   2  -5   0 1266.07  122.09
   2  -5   0 1263.67  122.39
  -2   5   0 1181.38  122.49
  -2   5   0 1109.59  122.69
  -2   5   0 1277.27  122.29
  -2   5   0 1339.27  121.89
  -2   5   0 1130.09  124.09
  -2   5   0 1307.47  121.99
   1  -5   0  178.58   16.80
   1  -5   0  150.28   16.50
   1  -5   0  160.48   16.40
  -1   5   0  155.78   16.30
  -1   5   0  145.99   16.70
  -1   5   0  160.08   17.00
  -1   5   0  162.58   16.80
  -1   5   0  169.68   17.10
   0  -5   0  538.95   54.09
   0  -5   0  599.34   54.39
   0  -5   0  555.44   53.89
   0   5   0  468.85   54.99
   0   5   0  563.54   54.29
   0   5   0  553.94   54.09
   0   5   0  547.55   53.99
   0   5   0  546.95   54.09
   0   5   0  519.95   54.09
  -1  -5   0  767.52   79.89
  -1  -5   0  780.92   79.59
  -1  -5   0  872.01   79.49
  -1  -5   0  844.52   80.39
   1   5   0  794.42   79.89
   1   5   0  801.22   79.89
   1   5   0  824.32   79.69
   1   5   0  770.32   79.89
  -2  -5   0  298.57   31.70
  -2  -5   0  294.07   30.80
  -2  -5   0  302.97   30.50
   2   5   0  303.87   30.50
   2   5   0  314.17   30.40
   2   5   0  311.67   30.60
  -3  -5   0  350.46   38.10
   3   5   0  356.66   36.60
   3   5   0  421.56   38.80
   3   5   0  370.96   37.10
   3   5   0  358.36   37.00
   3   5   0  369.96   36.90
  -4  -5   0    4.60   11.00
  -4  -5   0   15.60   14.60
  -4  -5   0   39.60    9.10
  -4  -5   0   50.79    7.10
  -4  -5   0   14.90   11.20
   4   5   0   29.30    4.30
   4   5   0   26.50    5.70
   4   5   0   30.40    5.30
   4   5   0   39.20    5.30
   4   5   0   26.20    4.80
   4   5   0   39.70    6.90
  -5  -5   0  612.14   61.99
   5   5   0  629.74   60.99
   5   5   0  535.95   60.29
   5   5   0  624.94   60.19
   5   5   0  567.74   60.29
   5   5   0  605.14   60.49
   5   5   0  677.53   60.39
  -6  -5   0   -4.90   13.60
  -6  -5   0   16.00   14.20
  -6  -5   0    3.60   10.30
  -6  -5   0  -10.00   11.20
  -6  -5   0   -0.60   13.90
   6   5   0   -2.40    3.20
   6   5   0    4.30    7.40
   6   5   0    1.80    4.30
   6   5   0    0.60    5.80
   6   5   0    2.80    3.70
   6   5   0    8.90    4.10
   6   5   0    7.20    3.30
  -7  -5   0   33.30   17.80
  -7  -5   0   54.19   16.20
  -7  -5   0   23.00   19.10
   7   5   0   68.99    8.60
   7   5   0   58.39    7.60
   7   5   0   64.89    9.00
   7   5   0   54.79   10.10
   7   5   0   54.69   10.00
   7   5   0   56.29    9.30
  -8  -5   0   45.20   24.40
  -8  -5   0   52.09   21.20
  -8  -5   0   26.80   21.30
  -8  -5   0   72.89   22.20
   8   5   0   92.69   11.60
   8   5   0   82.59   13.70
   8   5   0  104.69   10.80
   8   5   0   78.09   10.00
  -9  -5   0  143.69   25.70
  -9  -5   0   34.10   26.40
  -9  -5   0  101.59   27.40
  -9  -5   0  101.29   33.00
   9   5   0  106.79   16.20
   9   5   0  100.29   12.20
   9   5   0  117.69   13.80
   9   5   0   97.99   12.70
 -10  -5   0    4.10   27.40
 -10  -5   0   48.70   69.99
 -10  -5   0   17.00   28.20
 -10  -5   0   26.70   29.10
  10   5   0   11.20    5.40
  10   5   0    4.40    7.20
  10   5   0   -6.80   15.50
  10   5   0   12.10    5.60
 -11  -5   0   63.09   34.30
 -11  -5   0   98.29   37.80
 -11  -5   0   49.30   34.90
  11   5   0   22.40    7.40
  11   5   0   10.50    8.20
  11   5   0   35.40    8.60
  11   5   0   24.50    7.60
  11  -6   0    0.30   16.40
  11  -6   0   -7.10   22.60
 -11   6   0  -80.59   72.79
 -11   6   0  -10.30   47.00
 -11   6   0   16.40   21.00
 -11   6   0   -3.70   15.40
  10  -6   0  -12.50   16.60
  10  -6   0   11.20   19.80
  10  -6   0  -30.90   25.90
 -10   6   0   17.90   10.90
 -10   6   0   16.90   15.80
 -10   6   0   36.40   41.10
 -10   6   0  -47.30   56.49
   9  -6   0   -0.30   27.60
   9  -6   0   77.89   16.70
   9  -6   0   24.30   19.10
  -9   6   0   67.69    9.90
  -9   6   0   36.60   15.50
  -9   6   0   76.39   40.00
  -9   6   0   61.89   20.30
   8  -6   0  102.39   13.90
   8  -6   0   86.69   27.00
   8  -6   0  111.09   16.10
  -8   6   0   38.90   36.50
  -8   6   0   29.40   34.40
  -8   6   0   81.39   21.60
  -8   6   0   96.09   15.40
  -8   6   0  108.79   12.80
   7  -6   0    3.50   10.00
   7  -6   0    8.20    6.90
   7  -6   0    0.00    8.50
   7  -6   0   -8.40   17.50
   7  -6   0   18.40   17.70
  -7   6   0   -0.10   17.50
  -7   6   0   17.70    8.20
  -7   6   0  -33.70   28.90
  -7   6   0  -10.60   20.40
  -7   6   0    5.30    7.10
   6  -6   0   90.89   16.70
   6  -6   0   53.69   22.80
   6  -6   0   65.99   16.20
   6  -6   0  101.29   12.30
   6  -6   0   87.39   12.80
  -6   6   0  104.09   11.70
  -6   6   0   80.69   10.40
  -6   6   0  143.49   26.20
  -6   6   0   90.99   12.30
  -6   6   0   99.19   21.80
  -6   6   0   29.30   26.60
   5  -6   0  458.25   61.49
   5  -6   0  551.94   56.39
   5  -6   0  560.14   54.69
   5  -6   0  436.46   61.69
   5  -6   0  608.14   54.39
  -5   6   0  522.95   54.59
  -5   6   0  619.64   58.99
  -5   6   0  532.05   53.99
   4  -6   0  889.91  100.29
   4  -6   0 1059.19   97.49
   4  -6   0  968.90   97.69
   4  -6   0  947.91   98.59
  -4   6   0  939.21   98.19
  -4   6   0 1070.39   97.29
  -4   6   0  997.80   99.49
   3  -6   0   -2.00   14.70
   3  -6   0    2.50    3.80
   3  -6   0   11.10    4.20
   3  -6   0   -0.10    4.90
  -3   6   0    9.10    2.70
  -3   6   0   35.60   13.80
  -3   6   0    3.60    1.90
  -3   6   0   10.40   15.90
  -3   6   0    6.80    6.80
   2  -6   0   19.00    4.50
   2  -6   0   19.70    4.70
   2  -6   0   24.40    4.20
  -2   6   0   14.00    4.60
  -2   6   0   20.40    3.50
  -2   6   0    0.50   10.90
  -2   6   0   26.80    6.10
  -2   6   0   47.60   15.70
  -2   6   0   26.30    3.80
   1  -6   0   11.10    4.60
   1  -6   0   10.30    3.50
   1  -6   0   -0.80   23.70
   1  -6   0   32.40    4.80
   1  -6   0   42.40    8.30
  -1   6   0   27.70    5.30
  -1   6   0   11.70    9.00
  -1   6   0   20.30    3.70
  -1   6   0   20.30    4.60
  -1   6   0   19.40    5.50
   0  -6   0 2482.05  257.57
   0  -6   0 2800.52  257.87
   0  -6   0 2647.73  257.97
   0   6   0 2672.23  257.97
   0   6   0 2599.74  257.77
   0   6   0 2575.34  257.57
   0   6   0 2735.53  257.77
   0   6   0 2409.36  257.77
  -1  -6   0  201.48   23.50
  -1  -6   0  214.48   23.00
  -1  -6   0  261.07   24.40
  -1  -6   0  262.17   22.90
  -1  -6   0  206.38   22.90
   1   6   0  192.58   23.70
   1   6   0  252.57   23.70
   1   6   0  251.97   23.40
   1   6   0  254.77   23.40
   1   6   0  205.48   23.30
  -2  -6   0  624.44   59.19
  -2  -6   0  567.24   59.89
   2   6   0  672.93   58.99
   2   6   0  530.85   58.89
   2   6   0  597.54   58.89
   2   6   0  569.14   58.69
  -3  -6   0  176.08   19.20
  -3  -6   0  174.88   21.30
   3   6   0  177.58   18.90
   3   6   0  157.48   18.30
   3   6   0  194.78   18.60
   3   6   0  209.78   22.10
  -4  -6   0  123.59   16.30
  -4  -6   0  109.59   19.10
   4   6   0  120.89   14.20
   4   6   0  146.29   17.20
   4   6   0  138.39   14.40
   4   6   0  147.89   14.20
  -5  -6   0    5.90   14.80
  -5  -6   0   23.30   14.60
  -5  -6   0   -0.20   12.90
  -5  -6   0   17.70   10.30
   5   6   0    9.20    3.60
   5   6   0    8.60    3.70
   5   6   0   10.50    4.00
   5   6   0    9.00    2.80
   5   6   0   17.70    3.70
   5   6   0   11.70    6.30
  -6  -6   0  120.39   18.50
  -6  -6   0  144.19   23.90
  -6  -6   0   81.29   19.90
   6   6   0  118.49   13.30
   6   6   0  135.69   13.00
   6   6   0  120.49   13.80
   6   6   0  110.59   13.80
  -7  -6   0   92.29   22.80
  -7  -6   0  136.79   21.00
  -7  -6   0  127.79   24.70
   7   6   0  114.29   13.70
   7   6   0  106.99   13.30
   7   6   0  104.09   12.40
   7   6   0  120.49   13.70
  -8  -6   0   29.40   20.10
  -8  -6   0   -1.60   22.70
  -8  -6   0   -2.60   26.30
  -8  -6   0   -1.80   20.20
   8   6   0   12.30    3.70
   8   6   0    4.30    6.70
   8   6   0    6.80    6.20
   8   6   0    9.30    5.20
  -9  -6   0    2.40   34.90
  -9  -6   0   34.80   24.50
  -9  -6   0   21.60   25.10
  -9  -6   0    5.60   27.40
   9   6   0   14.40    6.00
   9   6   0   14.50    7.30
   9   6   0   27.20    5.00
 -10  -6   0    1.00   29.50
 -10  -6   0  -40.10   29.30
 -10  -6   0   57.49   33.90
  10   6   0    6.70    7.50
  10   6   0    1.20    6.10
  10   6   0    2.30    6.00
  10   6   0   13.30    5.60
  11  -7   0   75.39   26.50
  11  -7   0   76.69   22.60
 -11   7   0  103.49   18.60
 -11   7   0   85.59   25.70
 -11   7   0  122.29   57.09
 -11   7   0  240.98   83.89
  10  -7   0    2.00   20.90
  10  -7   0  -37.30   29.60
 -10   7   0  -11.30   25.50
 -10   7   0   52.19   43.30
 -10   7   0  -13.60   10.20
 -10   7   0  -97.29   54.49
   9  -7   0  416.26   48.40
  -9   7   0  445.26   48.00
  -9   7   0  436.96   74.49
  -9   7   0  426.76   78.49
  -9   7   0  413.56   43.80
   8  -7   0   40.30   25.60
   8  -7   0   61.19   13.80
   8  -7   0   37.80   20.80
  -8   7   0   28.50   23.90
  -8   7   0   17.70   40.10
  -8   7   0    2.20   32.60
   7  -7   0  191.38   33.60
   7  -7   0  207.58   21.90
   7  -7   0  116.39   31.80
   7  -7   0  168.48   22.30
   7  -7   0  179.38   26.00
  -7   7   0  250.97   39.60
  -7   7   0  171.38   22.00
  -7   7   0  225.88   23.50
  -7   7   0   73.39   37.20
  -7   7   0  156.18   19.10
   6  -7   0  306.77   34.80
   6  -7   0  380.36   39.30
   6  -7   0  360.66   38.30
   6  -7   0  359.16   34.40
  -6   7   0  271.07   33.10
  -6   7   0  332.37   34.70
   5  -7   0   51.79   13.10
   5  -7   0   72.59   15.80
   5  -7   0   70.39   11.30
   5  -7   0   53.29   21.10
   5  -7   0   86.19   11.20
  -5   7   0   70.79    8.80
  -5   7   0   59.29   10.20
  -5   7   0   75.99    8.50
  -5   7   0  118.49   20.30
  -5   7   0  103.09   20.30
  -5   7   0   24.10   25.90
   4  -7   0   21.20   15.90
   4  -7   0   32.20    7.00
   4  -7   0   34.30    7.00
   4  -7   0   27.60   16.30
   4  -7   0   34.00    8.20
  -4   7   0   -2.70   20.90
  -4   7   0   48.60    5.30
  -4   7   0   40.10    6.10
  -4   7   0   50.19   11.40
  -4   7   0   62.79   18.20
  -4   7   0   41.40    7.50
   3  -7   0  959.00  108.29
   3  -7   0 1289.57  108.19
   3  -7   0 1134.49  108.59
  -3   7   0 1060.99  107.69
  -3   7   0 1005.50  108.29
   2  -7   0   94.89   11.30
   2  -7   0   90.99   10.70
  -2   7   0   57.09   17.10
  -2   7   0   90.79   10.10
  -2   7   0   84.39   12.10
   1  -7   0 1017.20   96.19
   1  -7   0  927.51   95.89
  -1   7   0 1042.40   95.99
  -1   7   0  972.90   96.69
  -1   7   0 1011.60   96.09
  -1   7   0  966.10   95.89
  -1   7   0  822.52   97.49
   0  -7   0  431.76   47.30
   0  -7   0  419.76   47.60
   0  -7   0  488.25   47.80
   0   7   0  492.95   47.80
   0   7   0  470.95   48.10
   0   7   0  482.85   48.00
   0   7   0  485.45   47.70
   0   7   0  533.95   47.40
  -1  -7   0  -13.70    7.80
  -1  -7   0   19.30    8.60
  -1  -7   0   15.80    6.20
  -1  -7   0    8.50    2.20
  -1  -7   0    9.00    3.70
  -1  -7   0    3.90   26.40
   1   7   0    0.20    4.90
   1   7   0    4.00    3.50
   1   7   0    7.80    4.50
   1   7   0    0.60   15.30
  -2  -7   0    6.40    7.00
  -2  -7   0   11.40   18.60
  -2  -7   0    8.10    4.40
  -2  -7   0   -4.80   16.90
  -2  -7   0    2.90    2.50
   2   7   0   -1.40    3.60
   2   7   0    8.00    3.90
   2   7   0    8.80   11.90
   2   7   0    3.10    3.60
   2   7   0    5.90    3.60
   2   7   0    4.30    3.50
  -3  -7   0  175.58   21.50
  -3  -7   0  117.09   28.50
   3   7   0  193.48   22.90
   3   7   0  188.78   18.10
   3   7   0  182.78   18.20
   3   7   0  181.18   18.10
   3   7   0  146.69   17.80
  -4  -7   0  148.39   20.90
  -4  -7   0  148.99   18.30
   4   7   0  154.38   16.60
   4   7   0  171.68   16.90
   4   7   0  155.28   16.70
  -5  -7   0   69.29   14.30
  -5  -7   0   88.59   24.00
  -5  -7   0   85.09   14.80
  -5  -7   0   37.30   18.20
   5   7   0   70.69   13.80
   5   7   0   85.99    9.40
   5   7   0   84.09   10.20
  -6  -7   0   27.00   15.20
  -6  -7   0   22.10   32.30
  -6  -7   0    7.20   13.00
   6   7   0   19.80    5.10
   6   7   0   24.00    4.40
   6   7   0   21.30    4.90
  -7  -7   0   18.60   22.20
  -7  -7   0   29.50   18.90
  -7  -7   0   31.80   23.60
  -7  -7   0   38.70   23.10
   7   7   0   38.60    5.60
   7   7   0   34.50    6.70
   7   7   0   26.30    6.20
  -8  -7   0  118.09   24.10
  -8  -7   0   87.29   30.20
  -8  -7   0   87.39   33.50
  -8  -7   0  121.79   25.20
   8   7   0   97.79   11.10
   8   7   0   90.89   12.00
   8   7   0   76.19   12.70
  -9  -7   0   18.60   29.20
  -9  -7   0   13.50   26.90
  -9  -7   0   -6.90   40.80
  -9  -7   0    3.10   26.00
   9   7   0   10.20    5.70
   9   7   0   11.20    4.20
   9   7   0    3.30    6.80
   9   7   0   -1.00    4.60
 -10  -7   0   25.00   32.60
 -10  -7   0   29.80   33.30
 -10  -7   0    6.70   38.40
  10   7   0   12.00    6.20
  10   7   0    5.60    6.20
  10   7   0    8.30    5.30
  10  -8   0   58.49   25.00
  10  -8   0   42.20   24.20
 -10   8   0   70.29   57.79
 -10   8   0   57.49   19.90
 -10   8   0   89.89   60.59
 -10   8   0   67.19   12.70
   9  -8   0  -21.70   24.10
   9  -8   0   22.60   17.30
  -9   8   0   18.70   14.10
  -9   8   0    6.90    7.80
  -9   8   0   13.90   51.09
  -9   8   0  -49.90   42.40
   8  -8   0   -4.80   12.10
   8  -8   0  -18.90   25.20
   8  -8   0   -4.20   15.90
   8  -8   0  -18.00   25.70
  -8   8   0   12.70    6.30
  -8   8   0    7.40   45.20
  -8   8   0    2.60   11.00
  -8   8   0  -40.60   31.50
   7  -8   0  130.69   23.90
   7  -8   0  123.79   19.20
   7  -8   0  107.09   15.70
   7  -8   0   64.79   30.60
   7  -8   0   69.29   22.80
  -7   8   0   38.20   42.60
  -7   8   0   76.19   11.90
  -7   8   0  110.69   16.60
  -7   8   0  126.59   28.10
   6  -8   0   94.49   22.00
   6  -8   0  113.89   17.40
   6  -8   0   73.49   28.10
   6  -8   0  111.09   17.40
   6  -8   0  130.49   23.90
  -6   8   0  162.08   28.60
  -6   8   0  160.98   14.80
  -6   8   0   98.19   17.10
  -6   8   0  153.78   28.90
  -6   8   0  141.79   14.30
  -6   8   0   16.30   39.30
   5  -8   0  207.28   20.60
   5  -8   0  212.08   33.80
   5  -8   0  177.38   23.80
   5  -8   0  172.88   30.10
   5  -8   0  180.88   20.70
  -5   8   0  167.28   18.70
  -5   8   0  167.78   18.10
  -5   8   0  165.08   20.10
   4  -8   0  181.98   32.50
   4  -8   0  215.98   23.60
   4  -8   0  192.88   22.30
   4  -8   0  207.68   21.60
  -4   8   0  220.28   24.90
  -4   8   0  190.98   20.60
  -4   8   0  177.28   22.50
   3  -8   0    7.10    6.40
   3  -8   0    0.20   12.80
   3  -8   0   12.60   27.10
   3  -8   0    3.10    4.70
   3  -8   0    3.20    6.00
  -3   8   0    3.80    3.60
  -3   8   0    1.20    7.10
  -3   8   0   -8.10   20.20
  -3   8   0    1.10    6.00
  -3   8   0   12.90   19.90
   2  -8   0  490.45   49.30
   2  -8   0  453.45   48.90
   2  -8   0  460.25   48.90
   2  -8   0  469.45   50.99
  -2   8   0  507.85   49.20
  -2   8   0  461.15   49.60
  -2   8   0  543.45   48.50
   1  -8   0   -3.60    6.80
   1  -8   0    0.40    6.30
   1  -8   0    3.00    4.50
   1  -8   0   -1.70    3.40
   1  -8   0   -3.20   36.80
  -1   8   0   -1.20    4.20
  -1   8   0    7.40    4.30
  -1   8   0   -2.40   10.80
  -1   8   0   -7.80    5.80
  -1   8   0  -31.50   20.70
  -1   8   0    9.50    5.70
   0  -8   0  259.57   25.40
   0  -8   0  221.18   26.60
   0  -8   0  242.58   24.90
   0   8   0  261.57   25.50
   0   8   0  231.98   28.10
   0   8   0  259.97   25.50
   0   8   0  228.18   26.10
   0   8   0  237.98   26.50
  -1  -8   0  433.96   53.49
  -1  -8   0  534.35   51.49
   1   8   0  457.05   52.39
   1   8   0  498.05   52.19
   1   8   0  596.94   52.09
   1   8   0  551.24   51.89
   1   8   0  533.15   52.29
  -2  -8   0  432.46   47.40
   2   8   0  474.05   45.90
   2   8   0  488.35   46.10
   2   8   0  443.56   46.00
   2   8   0  455.45   46.10
   2   8   0  443.76   45.80
  -3  -8   0  828.12   86.09
  -3  -8   0  726.03   93.99
   3   8   0  944.51   85.79
   3   8   0  889.51   85.69
   3   8   0  817.72   85.59
   3   8   0  919.11   85.59
  -4  -8   0  173.78   23.00
  -4  -8   0  169.28   25.40
  -4  -8   0  250.57   43.30
   4   8   0  193.38   21.00
   4   8   0  193.38   25.60
   4   8   0  216.68   21.60
   4   8   0  237.68   21.80
   4   8   0  224.18   21.80
  -5  -8   0   30.10   10.30
  -5  -8   0   26.50   26.30
  -5  -8   0   30.40   11.20
   5   8   0   33.40    5.50
   5   8   0   29.20    5.90
   5   8   0   20.90    4.10
  -6  -8   0   57.99   19.30
  -6  -8   0  106.49   19.80
  -6  -8   0   79.59   29.80
   6   8   0   84.39   10.50
   6   8   0  102.49   11.60
   6   8   0   83.29   13.80
  -7  -8   0  206.68   32.40
  -7  -8   0  196.38   31.00
  -7  -8   0  240.28   37.60
   7   8   0  170.68   19.50
   7   8   0  173.88   19.60
   7   8   0  167.18   18.80
  -8  -8   0   43.90   32.80
  -8  -8   0    1.50   20.40
  -8  -8   0    0.80   35.60
   8   8   0    9.20    6.00
   8   8   0    4.80    4.10
   8   8   0   15.20    4.50
   8   8   0   13.30    6.80
  -9  -8   0   28.80   38.10
  -9  -8   0   81.69   52.69
  -9  -8   0    1.40   28.00
   9   8   0    4.60    5.00
   9   8   0   14.80    5.30
   9   8   0   17.70    7.40
   9   8   0   32.50    6.50
 -10  -8   0    9.60   42.00
 -10  -8   0   70.89   42.30
  10   8   0   18.60    8.90
  10   8   0   18.90    7.30
  10   8   0   24.00    6.80
  10   8   0   37.90    6.60
  10  -9   0   13.20   24.30
  10  -9   0   27.40   40.60
 -10   9   0   -7.00   10.70
 -10   9   0   -9.40   56.79
 -10   9   0   -6.50   64.29
 -10   9   0   31.30   18.10
   9  -9   0   30.00   18.50
   9  -9   0   26.80   45.50
   9  -9   0   18.20   34.30
  -9   9   0   29.80    8.90
  -9   9   0   37.20   15.40
   8  -9   0  -14.10   29.40
   8  -9   0   16.60   13.80
   8  -9   0  -27.40   23.30
   8  -9   0    6.30   17.50
  -8   9   0   24.10   46.70
  -8   9   0   -9.60   11.50
  -8   9   0  -21.70   32.30
  -8   9   0   -5.70    6.50
   7  -9   0   23.10   29.80
   7  -9   0   11.70   19.50
   7  -9   0   -4.30   11.10
   7  -9   0   -3.30   12.80
  -7   9   0  -20.40   20.30
  -7   9   0   -2.20    5.40
  -7   9   0   -8.50    9.10
  -7   9   0  -42.00   44.40
   6  -9   0    0.00   30.40
   6  -9   0   -1.30   18.20
   6  -9   0    6.40    8.90
   6  -9   0   -4.30   14.40
  -6   9   0   -4.10    4.50
  -6   9   0  -12.40    8.70
  -6   9   0    2.60   15.50
  -6   9   0  -46.40   38.10
  -6   9   0    0.80   25.20
   5  -9   0   74.39   25.70
   5  -9   0   52.79   12.10
   5  -9   0   70.99   11.00
   5  -9   0   69.99   23.40
   5  -9   0   56.79   13.90
  -5   9   0   50.99    8.60
  -5   9   0   54.79   10.70
  -5   9   0  123.69   26.70
   4  -9   0  777.72   77.99
   4  -9   0  729.03   78.29
   4  -9   0  756.22   77.69
   4  -9   0  883.71   82.79
   4  -9   0  643.44   88.49
  -4   9   0  775.92   76.89
  -4   9   0  814.12   76.49
   3  -9   0   25.40   35.90
   3  -9   0    8.00    7.00
   3  -9   0   19.70    9.20
  -3   9   0   58.49   23.90
  -3   9   0   25.20    4.20
  -3   9   0   25.60    5.20
  -3   9   0   22.50    8.70
  -3   9   0   -3.60   23.10
   2  -9   0  197.58   20.40
   2  -9   0  179.08   23.80
   2  -9   0  185.28   23.00
   2  -9   0  167.38   20.50
  -2   9   0  187.18   20.40
  -2   9   0  213.98   20.20
  -2   9   0  244.58   32.20
  -2   9   0  162.68   22.30
  -2   9   0  173.38   20.00
   1  -9   0   24.10    5.80
   1  -9   0   30.20    8.20
   1  -9   0   13.20   47.80
   1  -9   0   19.70    5.20
   1  -9   0   30.10    8.10
  -1   9   0   24.90   13.60
  -1   9   0   55.89   26.70
  -1   9   0   18.20    8.20
  -1   9   0   25.30    5.70
  -1   9   0   19.00    5.90
  -1   9   0   30.50    7.40
   0  -9   0    3.90    3.60
   0  -9   0  -24.10   39.40
   0  -9   0    7.50    4.90
   0  -9   0    8.10    8.40
   0   9   0   18.00   10.40
   0   9   0   17.60    6.60
   0   9   0    4.60    5.00
   0   9   0   13.30   22.90
   0   9   0   11.80    5.80
   0   9   0   -0.70    4.80
  -1  -9   0   12.90    6.30
  -1  -9   0    0.20   32.80
  -1  -9   0   16.40    3.70
  -1  -9   0   -1.60    8.70
   1   9   0   21.30   20.40
   1   9   0   10.40    5.90
   1   9   0   18.00    5.30
   1   9   0    9.70    7.60
  -2  -9   0   33.30   10.30
  -2  -9   0   37.80   30.20
  -2  -9   0   35.30    7.80
  -2  -9   0   31.80   17.90
  -2  -9   0   26.30    5.00
   2   9   0   38.60    6.20
   2   9   0   44.50    7.70
   2   9   0   21.20   16.60
   2   9   0   45.90    7.10
   2   9   0   24.00    6.00
   2   9   0   39.30    6.00
  -3  -9   0    5.30    9.00
  -3  -9   0   -7.00   25.90
  -3  -9   0    3.10   24.10
  -3  -9   0   16.50    7.40
   3   9   0   18.10    4.50
   3   9   0    9.50    5.80
   3   9   0   21.60   13.70
   3   9   0   20.80    5.40
   3   9   0   24.30    5.50
  -4  -9   0   34.80   13.10
  -4  -9   0   21.50   28.00
  -4  -9   0   60.19   10.50
   4   9   0   51.79    7.40
   4   9   0   63.49    9.10
   4   9   0   57.59    9.30
   4   9   0   55.19    7.90
  -5  -9   0  569.54   68.39
  -5  -9   0  681.63   67.09
   5   9   0  605.34   64.69
   5   9   0  742.03   65.19
  -6  -9   0    1.30   15.60
  -6  -9   0   26.10   30.90
  -6  -9   0    0.70   14.50
   6   9   0    2.60    5.80
   6   9   0    9.20    4.40
   6   9   0   -2.80    3.30
   6   9   0   -1.90    5.70
  -7  -9   0   46.20   26.80
  -7  -9   0   11.90   19.00
  -7  -9   0   27.30   29.70
   7   9   0   22.20    4.20
   7   9   0   35.80    7.00
   7   9   0   21.80    6.90
   7   9   0   25.60    5.70
  -8  -9   0    7.30   23.70
  -8  -9   0    3.60   38.10
   8   9   0   11.90    7.90
   8   9   0    3.90    5.50
   8   9   0   25.70    6.90
  -9  -9   0   51.79   42.50
  -9  -9   0   34.50   30.10
   9   9   0   16.90    8.40
   9   9   0   18.20    5.60
   9   9   0   19.70    5.50
   9   9   0   12.30    7.10
  10 -10   0   86.79   28.10
  10 -10   0   18.60   28.70
 -10  10   0  103.19   74.29
 -10  10   0   89.79   22.60
 -10  10   0  178.88   61.19
 -10  10   0   59.39   19.00
   9 -10   0   -3.90   19.80
   9 -10   0  -55.19   29.20
  -9  10   0   -8.10   67.09
  -9  10   0   -9.00   42.90
  -9  10   0  -18.10   14.80
  -9  10   0   -4.60    8.90
   8 -10   0   -7.60   35.80
   8 -10   0   33.20   15.20
   8 -10   0   47.70   30.00
  -8  10   0  103.89   33.90
  -8  10   0   52.99   13.60
  -8  10   0   13.00   53.49
  -8  10   0   65.59    9.50
   7 -10   0   67.89   36.00
   7 -10   0   76.49   23.30
   7 -10   0   74.69   19.30
   7 -10   0   85.99   15.50
  -7  10   0   42.10   12.30
  -7  10   0   66.69    9.50
  -7  10   0  -23.70   46.10
   6 -10   0   68.59   16.60
   6 -10   0  118.29   17.60
   6 -10   0  121.99   32.30
   6 -10   0  122.49   19.80
  -6  10   0   58.59   14.10
  -6  10   0   87.59   12.40
  -6  10   0   97.79   49.50
   5 -10   0   29.60   10.20
   5 -10   0   29.80   28.60
   5 -10   0   38.70   22.60
   5 -10   0   24.20   12.40
  -5  10   0   28.90    6.40
  -5  10   0   79.39   29.90
  -5  10   0   31.70    9.90
  -5  10   0  -94.39   70.39
  -5  10   0   62.59   14.30
   4 -10   0    7.80   10.20
   4 -10   0   17.00   36.10
   4 -10   0   14.50    8.80
   4 -10   0   14.10    9.60
   4 -10   0    6.70   18.10
  -4  10   0   13.20    5.20
  -4  10   0  -28.10   31.80
  -4  10   0    9.10   13.70
  -4  10   0   19.80   10.10
  -4  10   0   28.40   28.10
   3 -10   0  220.58   25.50
   3 -10   0  255.97   26.50
   3 -10   0  228.28   31.10
   3 -10   0  215.58   27.80
  -3  10   0  229.48   24.90
  -3  10   0  252.87   24.10
  -3  10   0  195.28   26.80
  -3  10   0  327.37   48.70
   2 -10   0  490.75   52.19
   2 -10   0  452.45   53.09
   2 -10   0  473.75   54.19
   2 -10   0  467.95   52.29
  -2  10   0  490.05   53.49
  -2  10   0  572.14   51.79
  -2  10   0  580.34   52.09
  -2  10   0  499.05   51.89
  -2  10   0  640.04   60.79
   1 -10   0  291.47   34.00
   1 -10   0  305.57   34.20
   1 -10   0  284.87   33.30
   1 -10   0  286.57   35.40
  -1  10   0  333.17   35.40
  -1  10   0  364.56   33.50
  -1  10   0  387.86   39.50
  -1  10   0  368.76   33.90
   0 -10   0   56.69    9.90
   0 -10   0   13.40   49.00
   0 -10   0   46.10    8.40
   0 -10   0   53.19   12.20
   0 -10   0   71.89   13.40
   0  10   0   69.49    9.40
   0  10   0   70.59   14.40
   0  10   0   49.80   10.10
  -1 -10   0   40.50   12.50
  -1 -10   0   47.00   12.90
  -1 -10   0   47.10    8.60
  -1 -10   0   50.69   42.20
  -1 -10   0   74.59   11.70
   1  10   0   65.09   10.50
   1  10   0   78.89   12.20
   1  10   0   73.99   11.80
   1  10   0   77.79   25.70
   1  10   0   62.99   10.30
   1  10   0   83.09   10.20
  -2 -10   0   61.39   12.50
  -2 -10   0   52.49   19.90
  -2 -10   0   34.10    9.20
  -2 -10   0   26.40   36.20
  -2 -10   0   35.70    7.90
   2  10   0   76.49   21.10
   2  10   0   66.99    9.20
   2  10   0   61.49    8.80
   2  10   0   44.70    9.60
   2  10   0   56.49    8.10
  -3 -10   0  161.48   31.80
  -3 -10   0   76.39   15.20
   3  10   0   69.19   13.20
   3  10   0   76.89   10.50
   3  10   0   83.69   10.50
   3  10   0   80.29   11.70
  -4 -10   0   -3.60    8.80
  -4 -10   0   15.80   12.80
  -4 -10   0   20.00   34.80
   4  10   0   21.80    6.70
   4  10   0    6.30    6.00
   4  10   0   12.70    4.10
  -5 -10   0   71.79   17.40
  -5 -10   0   58.99   14.80
  -5 -10   0  164.08   37.10
   5  10   0   80.59   12.70
   5  10   0   91.39   11.70
   5  10   0  105.49   12.40
   5  10   0   71.89    9.80
  -6 -10   0   28.10   17.40
  -6 -10   0   58.59   37.00
  -6 -10   0  -10.40   16.70
   6  10   0   16.00    6.40
   6  10   0   10.10    7.00
   6  10   0    8.00    5.40
   6  10   0    8.30    4.00
  -7 -10   0  105.69   30.20
  -7 -10   0   67.69   22.60
   7  10   0   73.79   12.00
   7  10   0   72.79   10.50
   7  10   0   74.69   10.70
   7  10   0   57.49    8.80
  -8 -10   0    8.70   25.20
  -8 -10   0   35.60   39.10
  -8 -10   0   27.30   42.20
   9  10   0   19.80    6.00
   9  10   0   11.20    5.50
   9  10   0   17.90    7.60
   9 -11   0    1.90   22.60
   9 -11   0  -25.40   34.00
  -9  11   0   19.90    9.90
  -9  11   0  -18.20   43.30
  -9  11   0   -7.00   16.40
  -9  11   0  -35.80   71.59
   8 -11   0   27.00   18.10
   8 -11   0  -19.30   28.60
   8 -11   0   50.99   46.10
  -8  11   0   31.10   35.60
  -8  11   0 -101.99  111.59
  -8  11   0   11.50   14.80
  -8  11   0   30.80    8.60
   7 -11   0  137.59   38.80
   7 -11   0  113.69   26.20
   7 -11   0  170.78   27.10
   7 -11   0  116.79   20.60
  -7  11   0  117.09   15.80
  -7  11   0  119.79   19.00
  -7  11   0  108.69   61.99
   6 -11   0   -6.90   12.30
   6 -11   0    9.90   16.40
   6 -11   0   15.80   16.80
   6 -11   0   -4.30   28.70
  -6  11   0    4.80    6.40
  -6  11   0  -83.59   49.40
  -6  11   0   16.10   17.20
  -6  11   0   13.80   12.00
   5 -11   0   29.40   13.00
   5 -11   0   39.40   12.10
   5 -11   0   37.80   15.10
   5 -11   0   67.49   27.90
  -5  11   0   24.00    7.40
  -5  11   0   35.10   44.70
  -5  11   0    8.60   11.50
   4 -11   0  137.99   21.10
   4 -11   0   64.49   50.59
   4 -11   0  208.68   30.70
   4 -11   0  143.69   24.60
   4 -11   0  186.18   22.60
  -4  11   0  145.19   17.90
  -4  11   0  159.08   22.80
  -4  11   0  150.68   16.80
  -4  11   0  268.17   44.80
   3 -11   0   33.00    9.50
   3 -11   0   46.90   14.20
   3 -11   0   34.00   10.10
   3 -11   0   46.00   62.49
   3 -11   0   28.40   12.50
  -3  11   0   12.60   44.70
  -3  11   0   29.70    6.00
  -3  11   0   29.80   30.50
  -3  11   0   23.40    8.60
  -3  11   0   20.40    7.20
  -3  11   0   52.89   12.40
   2 -11   0   16.00    7.40
   2 -11   0   24.30   11.50
   2 -11   0  -13.30   70.19
   2 -11   0   13.40   10.50
  -2  11   0   11.90    6.90
  -2  11   0   26.10   21.70
  -2  11   0   18.10    7.10
  -2  11   0   49.70   33.20
  -2  11   0   15.30    6.90
   1 -11   0   99.29   74.49
   1 -11   0  195.38   24.20
   1 -11   0  283.37   25.80
   1 -11   0  176.98   28.10
  -1  11   0  347.07   57.19
  -1  11   0  225.28   25.10
  -1  11   0  236.78   35.00
  -1  11   0  219.88   27.50
   0 -11   0   20.10   59.09
   0 -11   0  122.39   15.10
   0 -11   0  112.39   17.20
   0 -11   0  101.89   19.30
   0  11   0  171.88   18.70
   0  11   0  138.39   16.80
   0  11   0  165.28   24.40
  -1 -11   0  482.35   51.69
  -1 -11   0  514.75   54.49
  -1 -11   0  495.15   52.99
   1  11   0  536.75   52.19
   1  11   0  506.25   52.99
   1  11   0  582.24   54.79
  -2 -11   0  418.86   44.20
  -2 -11   0  417.46   50.79
  -2 -11   0  401.06   46.50
   2  11   0  452.75   44.60
   2  11   0  382.56   44.00
   2  11   0  448.36   42.90
  -3 -11   0    0.40   31.20
  -3 -11   0    6.10    9.50
   3  11   0    0.00    5.20
   3  11   0    3.00    7.30
   3  11   0    8.20    6.40
   3  11   0   -7.20    8.40
  -4 -11   0  162.68   25.50
   4  11   0  158.68   17.10
   4  11   0  112.19   18.60
   4  11   0  124.99   17.40
   4  11   0  153.68   15.90
  -5 -11   0  176.08   27.30
  -5 -11   0  129.29   20.30
   5  11   0  134.59   15.10
   5  11   0  111.19   17.20
   5  11   0  156.88   16.90
   5  11   0  137.99   18.00
  -6 -11   0    1.20   40.40
  -6 -11   0   10.00   19.10
  -6 -11   0    4.30   18.80
   6  11   0    3.10    6.40
   6  11   0   -0.20    8.00
   6  11   0    4.90    4.20
   6  11   0   -0.20    7.40
  -7 -11   0   26.60   30.40
  -7 -11   0   49.50   24.00
   7  11   0   33.40    7.20
   7  11   0   24.30    8.60
   7  11   0   33.30    5.70
  -8 -11   0   62.19   47.20
  -8 -11   0   64.59   29.20
   8  11   0   26.10    8.90
   8  11   0   30.90    7.50
   8  11   0   37.10    6.30
   8 -12   0   12.50   42.70
   8 -12   0   15.70   20.20
  -8  12   0   19.60   16.00
  -8  12   0   34.80   10.10
  -8  12   0   98.29   74.59
  -8  12   0   55.69   32.50
   7 -12   0   -4.90   22.70
   7 -12   0   10.90   27.40
   7 -12   0   13.00   37.50
   7 -12   0   10.60   14.90
  -7  12   0  -59.79   63.79
  -7  12   0   14.60   21.40
  -7  12   0   20.20   18.10
  -7  12   0   14.30    8.30
   6 -12   0   34.20   19.00
   6 -12   0   78.29   22.70
   6 -12   0   55.69   14.80
   6 -12   0   96.29   31.20
  -6  12   0  100.59   19.40
  -6  12   0   11.90   14.40
  -6  12   0  178.78   60.39
  -6  12   0   54.89    9.70
   5 -12   0   17.70   14.50
   5 -12   0   35.60   11.90
   5 -12   0   41.70   23.60
   5 -12   0   32.30   18.10
  -5  12   0   43.60   14.10
  -5  12   0   41.20    8.20
  -5  12   0   14.10   13.40
  -5  12   0   43.90   48.60
   4 -12   0   40.80   17.10
   4 -12   0   73.69   20.30
   4 -12   0   63.19   14.30
   4 -12   0   69.29   14.10
  -4  12   0   99.09   16.50
  -4  12   0   53.99   14.00
  -4  12   0   63.39   10.40
  -4  12   0  116.39   41.30
   3 -12   0   26.30   11.30
   3 -12   0    4.50    9.60
   3 -12   0  -61.39   78.39
   3 -12   0   10.80   14.00
   3 -12   0   -9.40   14.00
  -3  12   0    1.60    8.30
  -3  12   0    9.60    7.50
  -3  12   0   21.50   14.30
  -3  12   0    4.00    6.00
  -3  12   0   -2.90   39.80
  -3  12   0   42.20   32.90
   2 -12   0  120.59   22.00
   2 -12   0  111.79   17.00
   2 -12   0  108.89   19.30
   2 -12   0   59.09   91.09
   2 -12   0  118.09   17.10
  -2  12   0   79.79   16.90
  -2  12   0  138.09   16.40
   1 -12   0   93.69   15.20
   1 -12   0   86.39   15.00
   1 -12   0  114.89   16.30
   1 -12   0   64.79   86.79
  -1  12   0  126.09   16.50
  -1  12   0  167.98   45.20
  -1  12   0  131.99   18.20
  -1  12   0   79.89   16.50
  -1  12   0  119.19   24.30
   0 -12   0    6.90    6.00
   0 -12   0  -30.20   72.29
   0 -12   0    5.50    9.40
   0 -12   0    7.20   13.80
   0  12   0    4.60   15.70
   0  12   0  -32.00   36.50
   0  12   0   16.70    8.90
   0  12   0    7.30    9.00
   0  12   0   -1.10    7.40
  -1 -12   0   77.19   11.50
  -1 -12   0   71.79   12.60
   1  12   0  106.79   13.50
   1  12   0   63.69   11.50
  -2 -12   0   25.60   15.00
  -2 -12   0   11.60   10.60
   2  12   0   26.50    8.90
   2  12   0   43.10   12.70
   2  12   0   51.89    8.20
  -3 -12   0  159.78   34.80
  -3 -12   0   84.29   16.60
  -3 -12   0   80.69   19.60
   3  12   0   99.19   15.10
   3  12   0  112.49   19.00
   3  12   0  140.69   15.30
   3  12   0  125.09   14.70
  -4 -12   0   77.19   20.00
  -4 -12   0   94.79   17.10
   4  12   0   90.39   17.10
   4  12   0   83.29   15.10
   4  12   0  122.29   14.20
   4  12   0  107.79   13.40
  -5 -12   0   92.19   47.40
  -5 -12   0    9.20   15.60
  -5 -12   0   -8.10   17.40
   5  12   0    8.00    7.20
   5  12   0    1.60    7.50
   5  12   0   12.10    5.20
   5  12   0    9.90    9.40
  -6 -12   0  141.29   27.30
  -6 -12   0  115.99   27.70
   6  12   0  164.58   19.50
   6  12   0  171.78   18.50
   6  12   0  134.99   17.00
  -7 -12   0   25.10   33.00
  -7 -12   0   47.10   46.90
  -7 -12   0    3.80   25.40
   7  12   0   -0.20    6.50
   7  12   0   15.30    9.00
   7  12   0   10.90    4.90
   8 -13   0   27.90   23.10
   8 -13   0   67.69   44.50
  -8  13   0   -5.20   31.30
  -8  13   0    8.60   16.90
  -8  13   0   13.60   81.99
  -8  13   0   10.20   11.80
   7 -13   0  -13.20   18.70
   7 -13   0    7.40   35.80
  -7  13   0  -21.50   69.49
  -7  13   0    8.40   15.10
  -7  13   0    0.40    8.80
   6 -13   0   86.99   30.60
   6 -13   0   29.10   18.80
   6 -13   0   -2.90   27.20
  -6  13   0   58.69   19.00
  -6  13   0   31.60   16.80
  -6  13   0   16.70    9.10
  -6  13   0   81.39   61.39
   5 -13   0   70.79   24.20
   5 -13   0   19.10   15.20
   5 -13   0   42.20   16.30
  -5  13   0   15.10   15.60
  -5  13   0   36.80   14.70
  -5  13   0   25.30    9.10
  -5  13   0  167.88   53.79
   4 -13   0  187.48   28.70
   4 -13   0  195.08   29.70
  -4  13   0  186.48   31.50
  -4  13   0  248.98   24.50
   3 -13   0   -2.80   11.70
   3 -13   0    4.00   15.00
   3 -13   0  -19.30   12.50
  -3  13   0    5.50    9.50
  -3  13   0   11.40   13.80
  -3  13   0   -5.20    8.60
  -3  13   0   21.60   34.50
   2 -13   0   66.99   15.90
   2 -13   0   91.79   17.60
   2 -13   0   73.69  112.99
   2 -13   0  105.29   20.10
   2 -13   0   54.89   20.00
  -2  13   0   92.79   16.40
  -2  13   0  197.88   54.09
  -2  13   0  136.09   18.70
  -2  13   0   75.49   13.60
   1 -13   0   33.30   10.20
   1 -13   0   19.90    8.80
   1 -13   0   49.00   17.00
   1 -13   0   16.20   11.90
   1 -13   0  -50.29  103.69
  -1  13   0   30.40   10.00
  -1  13   0   -0.30   11.50
  -1  13   0   38.10   11.70
  -1  13   0   -4.00   49.60
   0 -13   0   15.90   10.40
   0 -13   0   27.70   16.60
   0 -13   0   24.60    8.00
   0  13   0   21.10   12.10
   0  13   0   48.00    9.90
   0  13   0   28.80   10.80
   0  13   0   27.20   19.10
  -1 -13   0   -9.10   16.20
  -1 -13   0   -5.80   10.80
   1  13   0    1.90   15.30
   1  13   0   -9.30    9.50
   1  13   0    9.30    8.10
  -2 -13   0    6.30   11.70
  -2 -13   0    0.70   16.50
   2  13   0   14.00   13.60
   2  13   0    7.20    8.20
   2  13   0   -5.20    7.60
  -3 -13   0  191.58   29.90
   3  13   0  194.28   24.80
   3  13   0  231.38   23.80
   3  13   0  213.78   23.80
   3  13   0  180.38   27.90
  -4 -13   0   -4.50   18.60
  -4 -13   0   13.40   14.60
  -4 -13   0   34.40   43.20
   4  13   0   11.90    6.80
   4  13   0  -11.30    7.70
   4  13   0   -8.40    8.90
   4  13   0   -8.60   11.10
  -5 -13   0    9.50   17.50
  -5 -13   0   31.80   24.30
   5  13   0   22.70    8.40
   5  13   0   17.50   14.20
  -6 -13   0   19.40   24.70
  -6 -13   0   48.90   53.09
  -6 -13   0  -15.30   23.70
   6  13   0   -4.80    7.80
   6  13   0    0.20    9.10
   6  13   0    6.30    5.50
   7 -14   0  -16.00   21.50
   7 -14   0  -11.70   37.40
   7 -14   0   83.89   56.19
  -7  14   0  -51.59   75.39
  -7  14   0    0.50   24.20
  -7  14   0    1.90   19.70
  -7  14   0  -18.60   10.40
   6 -14   0  126.99   28.20
   6 -14   0  152.68   37.20
   6 -14   0  114.79   24.40
  -6  14   0  142.39   24.60
  -6  14   0  115.69   19.40
   5 -14   0   18.80   17.40
   5 -14   0    9.40   24.40
   5 -14   0    1.60   26.90
  -5  14   0   37.20   55.39
  -5  14   0    0.50   14.30
  -5  14   0   -2.40    9.60
  -5  14   0  -15.00   17.10
   4 -14   0    1.70   15.80
   4 -14   0  -23.00   23.20
   4 -14   0    2.90   19.60
  -4  14   0    8.40   44.80
  -4  14   0   -2.40   12.50
  -4  14   0   -9.20    9.50
   3 -14   0   28.40   21.60
   3 -14   0   -2.70   14.60
   3 -14   0    1.60   13.70
   3 -14   0   -0.20   16.50
  -3  14   0  -13.60   16.40
  -3  14   0    1.40   37.70
  -3  14   0   -5.50   10.00
   2 -14   0   24.40   12.50
   2 -14   0   26.60   13.60
   2 -14   0   10.40   20.60
  -2  14   0   85.09   33.90
  -2  14   0   61.79   15.60
  -2  14   0   34.60   12.20
  -2  14   0   38.10   11.90
   1 -14   0   27.50   19.80
   1 -14   0  -12.80   13.90
   1 -14   0   18.50   10.10
  -1  14   0   21.30   15.00
  -1  14   0   55.99   27.40
  -1  14   0    8.30   11.00
  -1  14   0   43.90   12.80
   0 -14   0  155.28   27.50
   0  14   0  226.88   35.50
   0  14   0  184.38   22.40
   0  14   0  177.78   25.80
   0  14   0  125.19   22.30
  -1 -14   0   -4.30   19.30
  -1 -14   0    2.00   12.90
   1  14   0   -4.60    8.60
   1  14   0   -3.00   11.80
   1  14   0   -6.80   17.60
   1  14   0   -7.30   10.80
  -2 -14   0   18.20   19.70
  -2 -14   0   23.40   13.70
   2  14   0   26.70    9.60
   2  14   0   51.89   16.80
   2  14   0   36.70   10.90
   2  14   0   30.00   11.30
  -3 -14   0  193.18   28.70
  -3 -14   0  162.68   29.30
   3  14   0  195.78   24.40
  -4 -14   0   -1.00   20.50
  -4 -14   0  -13.40   16.70
   4  14   0    9.80   10.60
   4  14   0   19.30    9.10
  -5 -14   0  120.99   59.39
  -5 -14   0   51.69   24.40
   5 -15   0   -7.40   25.60
   5 -15   0   -3.70   21.40
   5 -15   0   14.20   33.30
   5 -15   0   26.70   21.20
  -5  15   0   -9.70   11.50
  -5  15   0  -38.50   58.39
  -5  15   0   10.20   20.10
   4 -15   0   48.30   23.10
   4 -15   0   35.90   19.50
   4 -15   0   16.40   20.00
   4 -15   0   60.89   29.60
  -4  15   0   38.80   21.70
  -4  15   0  129.29   50.99
  -4  15   0   38.90   13.30
   3 -15   0   -4.00   16.50
   3 -15   0   25.80   16.10
   3 -15   0   18.00   24.90
  -3  15   0    5.20   41.70
  -3  15   0   -1.90   18.50
  -3  15   0  -17.60   12.10
   2 -15   0   -7.90   22.90
   2 -15   0   -3.60   14.10
   2 -15   0    8.50   17.20
  -2  15   0   -8.20   12.50
  -2  15   0   43.00   36.10
  -2  15   0   -8.20   17.20
   1 -15   0   13.40   16.60
   1 -15   0    1.60   23.10
  -1  15   0   -6.20   30.60
  -1  15   0    5.20   13.60
  -1  15   0   -8.80   16.00
  -1  15   0  -10.00   11.90
   0 -15   0   66.59   22.60
   0 -15   0    7.90   27.60
   0  15   0    9.70   14.70
   0  15   0   57.39   14.70
   0  15   0   26.60   12.00
   0  15   0   75.99   26.60
  -1 -15   0   42.70   24.10
  -1 -15   0   19.00   26.80
   1  15   0   33.00   12.20
   1  15   0   72.99   14.90
   1  15   0   37.40   15.30
   1  15   0   82.29   22.80
  -2 -15   0   17.10   16.30
  -2 -15   0  -18.60   22.10
   2  15   0   -1.30    9.10
   2  15   0   -1.00   12.40
   2  15   0  -11.10   12.40
  -3 -15   0   19.20   18.20
  -3 -15   0   45.80   24.80
   3  15   0   24.50   12.70
   3  15   0   29.10   10.70
  -4 -15   0   51.49   21.30
  -4 -15   0   -1.40   25.50
   4  15   0   21.50   10.20
   4  15   0   38.40   10.90
   4  15   0   19.80   12.70
   3 -16   0  -26.20   48.00
   3 -16   0   24.30   22.30
  -3  16   0   26.70   14.80
  -3  16   0  108.79   52.19
  -3  16   0    2.50   20.90
   2 -16   0   17.80   28.50
   2 -16   0   -3.10   20.60
  -2  16   0   36.20   40.50
  -2  16   0   19.00   14.90
  -2  16   0  -18.00   19.60
   1 -16   0    7.40   27.30
   1 -16   0   43.00   20.10
  -1  16   0    9.80   18.30
  -1  16   0   88.59   35.20
  -1  16   0   36.30   14.60
   0 -16   0  -17.40   26.30
   0 -16   0    7.00   18.20
   0  16   0    3.10   16.00
   0  16   0   29.60   17.90
   0  16   0   48.80   45.50
   0  16   0    5.50   12.20
  -1 -16   0   21.10   27.90
  -1 -16   0   23.20   18.00
   1  16   0   29.30   15.10
   1  16   0   16.10   12.50
   1  16   0   23.20   15.70
   2  16  -1   -0.40   10.80
   2  16  -1   12.90   13.70
   2  16  -1   -3.30   13.60
  -2 -16   1   -7.50   26.20
  -2 -16   1  -16.40   17.90
   1  16  -1   21.00   14.20
   1  16  -1   19.70   27.70
   1  16  -1   19.70   12.10
   1  16  -1    1.60   14.30
  -1 -16   1  -19.50   26.00
  -1 -16   1   10.40   17.40
   0  16  -1   -7.80   29.00
   0  16  -1  -12.90   15.30
   0  16  -1   -5.70   12.40
   0 -16   1    0.80   25.00
   0 -16   1   -8.60   17.80
  -1  16  -1   96.69   34.50
  -1  16  -1   22.70   13.40
  -1  16  -1    2.90   14.90
   1 -16   1   12.20   25.80
   1 -16   1   13.80   18.80
  -2  16  -1  222.68   28.80
  -2  16  -1  178.38   28.40
   2 -16   1  101.39   35.80
   2 -16   1  211.18   34.70
  -3  16  -1   15.20   13.10
  -3  16  -1   -2.80   17.60
   3 -16   1   15.50   18.60
   4  15  -1    8.00    9.10
   4  15  -1   -8.50   11.40
   4  15  -1   -3.50    9.70
  -4 -15   1   -3.90   18.80
  -4 -15   1   -4.00   23.00
   3  15  -1    3.10   10.20
   3  15  -1    7.00   11.30
   3  15  -1    2.10    9.40
  -3 -15   1   -3.20   22.70
  -3 -15   1   -6.60   28.10
   2  15  -1   44.20   13.20
   2  15  -1   39.50   11.40
   2  15  -1   95.99   20.20
   2  15  -1   57.49   12.70
  -2 -15   1   45.70   18.40
   1  15  -1   22.80   10.50
   1  15  -1   -5.90   20.50
   1  15  -1   14.20   12.20
   1  15  -1   -2.10   12.30
  -1 -15   1   -1.30   14.80
  -1 -15   1   -4.10   18.70
   0  15  -1  121.99   18.30
   0  15  -1   81.19   19.40
   0  15  -1  147.59   28.20
   0 -15   1   57.39   23.70
   0 -15   1   77.89   18.90
  -1  15  -1  151.28   21.00
  -1  15  -1  124.89   21.30
   1 -15   1  105.19   30.00
   1 -15   1   83.39   26.30
  -2  15  -1    6.10   12.20
  -2  15  -1    7.90   15.20
  -2  15  -1   69.09   35.20
   2 -15   1   24.10   14.00
   2 -15   1   34.00   23.00
   2 -15   1    5.60   17.00
  -3  15  -1    6.40   11.10
  -3  15  -1   15.10   17.60
  -3  15  -1  -11.70   41.30
   3 -15   1  -14.30   23.10
   3 -15   1   19.10   15.60
   3 -15   1   -8.10   15.90
  -4  15  -1   48.70   13.80
  -4  15  -1   56.79   22.00
  -4  15  -1   95.69   16.70
   4 -15   1   61.69   27.90
   4 -15   1   79.79   24.40
   4 -15   1   54.29   19.60
   4 -15   1   55.09   20.50
  -5  15  -1   67.79   12.90
  -5  15  -1   52.29   18.50
  -5  15  -1   65.09   22.00
  -5  15  -1  155.18   61.29
   5 -15   1   76.49   28.20
   5 -15   1   53.39   30.90
   5 -15   1   69.59   22.60
   5 -15   1   57.39   20.70
   5  14  -1   21.00    8.90
   5  14  -1   28.60   10.20
   5  14  -1   27.40    7.60
  -5 -14   1  -12.70   22.30
  -5 -14   1   94.89   53.79
  -5 -14   1    9.00   20.50
   4  14  -1   49.50   10.40
   4  14  -1   67.39   12.30
   4  14  -1   50.39   12.40
  -4 -14   1   50.49   18.10
   3  14  -1   19.90   14.90
   3  14  -1   20.20    8.80
   3  14  -1   19.00    8.60
   3  14  -1    9.70   10.10
  -3 -14   1   27.10   17.30
  -3 -14   1    4.10   14.30
   2  14  -1   36.40    9.70
   2  14  -1   52.69   16.50
   2  14  -1    9.10    9.70
   2  14  -1   56.49   10.10
  -2 -14   1   13.80   19.40
  -2 -14   1   30.50   14.10
   1  14  -1    3.00   10.00
   1  14  -1   17.70    8.80
   1  14  -1   -6.40   20.00
   1  14  -1   -9.30   10.80
  -1 -14   1    0.00   10.80
  -1 -14   1  -20.90   18.00
   0  14  -1   47.10   21.10
   0  14  -1   29.00   10.80
   0  14  -1   27.10   11.90
   0 -14   1   35.70   13.70
   0 -14   1   56.39   18.80
  -1  14  -1   57.09   15.50
  -1  14  -1   42.30   12.20
  -1  14  -1   83.39   13.70
  -1  14  -1  119.59   27.40
   1 -14   1   36.90   19.80
   1 -14   1   45.50   15.00
   1 -14   1   46.10   11.50
  -2  14  -1  109.89   14.30
  -2  14  -1   74.79   16.60
   2 -14   1   71.39   21.00
   2 -14   1   83.99   17.30
   2 -14   1   69.19   16.90
   2 -14   1   70.69   15.00
  -3  14  -1   61.09   16.90
  -3  14  -1  182.38   40.90
  -3  14  -1   72.39   13.70
  -3  14  -1   77.79   12.70
   3 -14   1   55.89   19.20
   3 -14   1   74.09   15.90
   3 -14   1   69.69   16.10
   3 -14   1   14.30   21.20
  -4  14  -1   99.49   19.80
  -4  14  -1   84.39   18.70
  -4  14  -1  213.98   48.60
  -4  14  -1   80.99   13.40
   4 -14   1   96.29   19.00
   4 -14   1   32.00   23.00
   4 -14   1  110.79   24.30
   4 -14   1   74.19   18.50
  -5  14  -1   -4.40    8.60
  -5  14  -1  -52.99   52.69
  -5  14  -1  -13.10   17.00
  -5  14  -1  -22.40   14.80
   5 -14   1  -14.80   23.70
   5 -14   1  -35.90   15.70
   5 -14   1   19.30   26.70
   5 -14   1  -10.90   16.90
  -6  14  -1  159.88   21.10
  -6  14  -1   91.59   24.50
   6 -14   1  136.29   25.30
   6 -14   1  239.18   39.80
   6 -14   1  197.58   33.90
   6 -14   1  156.38   33.80
  -7  14  -1  -13.40   73.99
  -7  14  -1   17.50   25.60
  -7  14  -1  -17.00   18.30
  -7  14  -1  -17.30   11.50
   7 -14   1   17.50   36.80
   7 -14   1    2.80   20.40
   7 -14   1   28.30   40.10
   6  13  -1   67.19   13.30
   6  13  -1   95.39   11.90
  -6 -13   1   79.19   25.30
  -6 -13   1  150.98   25.00
   5  13  -1    7.20   10.20
   5  13  -1   23.00   11.20
   5  13  -1   24.20    6.10
   5  13  -1   36.20    7.90
  -5 -13   1   -9.20   19.00
  -5 -13   1   84.59   48.00
  -5 -13   1   19.60   17.70
   4  13  -1  -14.90   10.80
   4  13  -1    2.40    6.10
   4  13  -1   -5.20    8.40
   4  13  -1    0.10    7.20
  -4 -13   1   -8.20   16.60
  -4 -13   1   26.80   41.80
  -4 -13   1   -2.00   13.90
   3  13  -1   36.50    9.90
   3  13  -1   37.50    8.00
   3  13  -1   40.80   12.80
   3  13  -1   25.00    8.20
  -3 -13   1   29.20   17.20
  -3 -13   1   39.80   31.60
  -3 -13   1   35.60   13.20
   2  13  -1   65.79   10.20
   2  13  -1   66.99   15.30
   2  13  -1   61.99   10.00
  -2 -13   1   38.70   12.30
  -2 -13   1   35.10   16.80
   1  13  -1   38.10   15.40
   1  13  -1    5.30    7.80
   1  13  -1   24.10    8.40
   1  13  -1   14.00    9.70
  -1 -13   1    5.00   10.50
  -1 -13   1    6.10   14.70
   0  13  -1    4.90   17.00
   0  13  -1    5.40   10.60
   0  13  -1   12.00    8.50
   0  13  -1   16.30    9.30
   0 -13   1   -4.70   10.00
   0 -13   1   -4.00    7.10
   0 -13   1    3.60   14.60
  -1  13  -1   69.19   23.00
  -1  13  -1   57.39   14.00
  -1  13  -1   59.99   11.80
  -1  13  -1   44.40   10.50
  -1  13  -1   55.09   11.90
  -1  13  -1   68.19   50.99
   1 -13   1   21.30   15.90
   1 -13   1  -63.69   93.19
   1 -13   1   58.99   11.70
   1 -13   1   29.60    9.90
   1 -13   1   48.50   12.00
  -2  13  -1  238.08   25.80
  -2  13  -1  221.38   26.60
  -2  13  -1  205.28   57.19
  -2  13  -1  190.38   24.30
   2 -13   1   59.59  103.89
   2 -13   1  220.98   27.30
   2 -13   1  159.78   26.60
   2 -13   1  148.39   25.40
  -3  13  -1  748.73   81.39
  -3  13  -1  830.72   79.39
   3 -13   1  729.53   89.89
   3 -13   1  727.73   80.59
   3 -13   1  885.01   82.99
  -4  13  -1   22.80   13.90
  -4  13  -1   13.20   14.10
  -4  13  -1   31.20    8.70
   4 -13   1   50.59   21.20
   4 -13   1   10.70   13.20
   4 -13   1   14.80   13.20
  -5  13  -1  138.69   20.20
  -5  13  -1  155.78   26.90
   5 -13   1  245.58   39.20
   5 -13   1  154.58   23.90
   5 -13   1  181.68   28.40
   5 -13   1  179.98   29.10
  -6  13  -1   68.69   27.40
  -6  13  -1  198.78   63.99
  -6  13  -1   50.39   10.10
   6 -13   1   45.90   23.80
   6 -13   1   86.89   32.60
   6 -13   1   55.59   34.40
  -7  13  -1   48.20   15.00
  -7  13  -1  171.78   70.09
  -7  13  -1   46.10   10.50
   7 -13   1   73.19   29.90
   7 -13   1   14.60   16.60
  -8  13  -1  113.49   36.30
  -8  13  -1   31.20   17.70
  -8  13  -1   17.20   10.90
  -8  13  -1   74.39   81.79
   8 -13   1   85.49   42.30
   8 -13   1   20.20   22.60
   7  12  -1   -0.80    8.40
   7  12  -1    3.20    4.70
   7  12  -1   -0.30    6.70
  -7 -12   1    7.40   24.00
  -7 -12   1   13.70   46.20
  -7 -12   1   30.30   32.80
   6  12  -1  143.49   17.20
   6  12  -1  121.69   18.20
   6  12  -1  114.49   14.60
   6  12  -1  120.89   15.70
  -6 -12   1  114.09   24.50
  -6 -12   1   66.29   24.10
   5  12  -1   -4.10    7.30
   5  12  -1   -7.50    6.60
   5  12  -1    5.40    4.70
   5  12  -1    3.40    9.50
  -5 -12   1  -12.20   41.00
  -5 -12   1    1.70   15.40
  -5 -12   1    3.60   14.50
   4  12  -1   21.50    7.20
   4  12  -1   15.70    9.30
   4  12  -1    5.90    5.30
   4  12  -1   -2.90    6.30
  -4 -12   1    8.20   15.60
  -4 -12   1   -7.70   11.60
  -4 -12   1   23.50   38.40
   3  12  -1   50.29   11.20
   3  12  -1   51.79    8.20
   3  12  -1   48.50    9.20
   3  12  -1   46.10    8.40
  -3 -12   1   70.69   29.80
  -3 -12   1   36.80   11.70
   2  12  -1   96.99   11.40
   2  12  -1   74.09   12.00
   2  12  -1   78.09   13.50
   2  12  -1  101.39   17.30
  -2 -12   1   62.79   16.30
  -2 -12   1   57.89   12.90
  -2 -12   1   68.69   22.70
   1  12  -1   24.30   12.80
   1  12  -1   16.80    7.30
   1  12  -1   21.20    7.60
   1  12  -1    4.40    7.30
  -1 -12   1    2.30    9.00
  -1 -12   1   19.30    5.60
  -1 -12   1  -13.70   58.29
  -1 -12   1    8.20   11.50
   0  12  -1 1191.48  129.79
   0  12  -1 1318.87  129.59
   0  12  -1 1532.95  131.39
   0 -12   1 1286.47  130.59
   0 -12   1 1416.76  128.39
   0 -12   1 1115.39  128.99
   0 -12   1 1228.68  128.39
  -1  12  -1  213.68   20.80
  -1  12  -1  186.88   21.70
  -1  12  -1  146.49   22.70
  -1  12  -1  185.58   31.20
   1 -12   1   60.49   80.89
   1 -12   1  169.98   20.50
   1 -12   1  153.68   22.20
   1 -12   1  178.18   22.70
  -2  12  -1  268.37   28.10
  -2  12  -1  247.98   31.40
  -2  12  -1  292.77   27.80
   2 -12   1  295.87   31.20
   2 -12   1  246.58   28.70
   2 -12   1  215.08   28.50
   2 -12   1  222.58   87.99
   2 -12   1  205.78   31.40
  -3  12  -1   75.09   16.20
  -3  12  -1   79.49   11.60
  -3  12  -1   54.79   43.00
  -3  12  -1  101.59   15.40
  -3  12  -1   70.59   11.10
   3 -12   1  105.29   14.60
   3 -12   1   78.59   16.40
   3 -12   1   77.89   13.80
   3 -12   1   85.69   92.39
   3 -12   1   87.59   18.80
  -4  12  -1  197.98   28.60
   4 -12   1  289.37   38.10
   4 -12   1  180.68   30.90
   4 -12   1  218.18   28.80
   4 -12   1  245.98   27.80
  -5  12  -1   95.39   13.00
  -5  12  -1   64.99   15.50
   5 -12   1  141.79   29.60
   5 -12   1   44.10   17.80
   5 -12   1   95.49   17.90
   5 -12   1   70.59   15.70
  -6  12  -1   -6.70    6.90
  -6  12  -1  -48.80   49.00
  -6  12  -1   12.80   19.40
  -6  12  -1    2.90   11.10
   6 -12   1   -6.00   19.40
   6 -12   1   -7.80   16.60
   6 -12   1    8.60   13.40
   6 -12   1   -6.10   30.60
  -7  12  -1  107.69   28.30
  -7  12  -1   43.50    9.30
  -7  12  -1   42.80   61.69
   7 -12   1   21.20   23.70
   7 -12   1    0.40   36.50
   7 -12   1   10.90   28.30
   7 -12   1   32.00   16.60
  -8  12  -1  -10.10   14.60
  -8  12  -1  -26.00   34.50
  -8  12  -1  -94.49   68.19
  -8  12  -1  -12.10    8.80
   8 -12   1    7.50   39.00
   8 -12   1   -3.10   18.60
   8  11  -1   14.80    5.10
   8  11  -1   31.00    8.40
   8  11  -1   24.30    6.60
  -8 -11   1   56.09   27.60
  -8 -11   1   63.79   43.70
   7  11  -1    9.10    4.30
   7  11  -1   11.30    7.70
   7  11  -1   -3.20    9.80
   7  11  -1    6.40    6.10
  -7 -11   1   63.19   42.80
  -7 -11   1   -4.90   20.30
  -7 -11   1  -18.10   29.40
   6  11  -1    3.20    8.00
   6  11  -1    4.60    7.30
   6  11  -1   -1.90    6.10
   6  11  -1    4.70    4.00
  -6 -11   1   13.80   17.90
  -6 -11   1    3.60   17.90
  -6 -11   1    6.30   38.70
   5  11  -1   36.30    7.40
   5  11  -1   26.50    5.50
   5  11  -1   41.60    8.90
   5  11  -1   31.00    8.10
  -5 -11   1   78.19   38.10
  -5 -11   1   22.50   14.40
  -5 -11   1   49.70   16.80
   4  11  -1  326.17   31.80
   4  11  -1  295.67   30.10
   4  11  -1  303.17   31.10
   4  11  -1  300.47   30.70
  -4 -11   1  256.17   36.10
  -4 -11   1  247.18   33.50
   3  11  -1    2.10    6.30
   3  11  -1    2.50    5.30
   3  11  -1    5.60    7.70
   3  11  -1   -0.20    4.80
  -3 -11   1   42.50   29.60
  -3 -11   1    2.30   11.00
  -3 -11   1    2.20    8.80
   2  11  -1  383.66   34.40
   2  11  -1  308.27   35.60
   2  11  -1  344.67   35.90
  -2 -11   1  285.07   43.60
  -2 -11   1  305.97   35.50
   1  11  -1   87.49   14.10
   1  11  -1   85.79   12.70
   1  11  -1   87.49   14.50
   1  11  -1  174.48   34.30
  -1 -11   1  100.39   15.50
  -1 -11   1   99.29   11.30
  -1 -11   1   97.99   14.40
  -1 -11   1   66.79   15.20
   0  11  -1   33.30    8.10
   0  11  -1   75.89   35.30
   0  11  -1   33.20    7.30
   0  11  -1   18.30    7.00
   0  11  -1   31.40   13.40
   0 -11   1   23.30    7.30
   0 -11   1  -34.80   51.59
   0 -11   1   14.40   11.20
   0 -11   1   21.30    7.20
   0 -11   1   15.60    5.60
  -1  11  -1  136.49   20.90
  -1  11  -1  122.39   16.40
  -1  11  -1   75.19   14.10
  -1  11  -1  131.99   13.80
  -1  11  -1  105.89   14.70
   1 -11   1   93.69   14.30
   1 -11   1   -1.80   66.69
   1 -11   1   90.39   13.90
   1 -11   1  102.49   16.30
   1 -11   1  114.99   17.10
  -2  11  -1  114.29   17.50
  -2  11  -1  197.48   27.20
  -2  11  -1  134.69   15.90
  -2  11  -1  110.59   15.00
  -2  11  -1  142.09   15.00
   2 -11   1  -18.40   65.99
   2 -11   1  121.29   20.50
   2 -11   1  115.69   18.90
   2 -11   1   94.99   15.80
   2 -11   1   80.39   16.20
  -3  11  -1    7.70    6.10
  -3  11  -1   26.50   28.30
  -3  11  -1   14.10    8.10
  -3  11  -1    1.90   10.50
  -3  11  -1   48.20   35.20
  -3  11  -1    7.10    4.40
   3 -11   1    9.10    9.20
   3 -11   1   -3.10   10.40
   3 -11   1  -17.50   53.99
   3 -11   1   -4.20    7.20
   3 -11   1   23.20   16.30
  -4  11  -1   40.20   10.70
  -4  11  -1   70.29   34.50
  -4  11  -1   54.99   12.50
  -4  11  -1   46.80    7.50
   4 -11   1   45.20   12.30
   4 -11   1   48.60   43.60
   4 -11   1   23.50    9.70
   4 -11   1   35.40   12.50
  -5  11  -1  433.46   49.10
  -5  11  -1  448.26   46.80
   5 -11   1  457.95   49.80
   5 -11   1  454.85   49.10
   5 -11   1  534.95   51.69
  -6  11  -1   99.99   22.10
  -6  11  -1    6.80   49.40
  -6  11  -1   49.90   12.90
   6 -11   1   52.29   16.40
   6 -11   1   53.59   18.60
   6 -11   1   60.79   13.60
   6 -11   1   60.09   31.20
  -7  11  -1  260.47   36.30
  -7  11  -1  250.37   72.49
  -7  11  -1  320.57   33.00
   7 -11   1  341.47   37.50
   7 -11   1  356.46   45.80
   7 -11   1  315.47   42.20
  -8  11  -1   30.60   16.40
  -8  11  -1  102.69   41.80
  -8  11  -1   -4.90   68.79
  -8  11  -1   37.70    9.20
   8 -11   1   33.40   29.30
   8 -11   1   73.39   25.70
   8 -11   1   28.50   15.50
   8 -11   1   51.19   37.10
  -9  11  -1   62.89   48.50
  -9  11  -1   38.60   10.70
  -9  11  -1  -27.30   74.09
  -9  11  -1   12.70   16.10
   9 -11   1   47.90   22.10
   9 -11   1  -16.50   34.50
   9  10  -1   27.00    6.30
   9  10  -1   26.60    8.10
   9  10  -1   24.80    6.00
  -9 -10   1   -8.30   30.30
  -9 -10   1   89.89   41.90
   8  10  -1    1.20    4.40
   8  10  -1    5.00    4.90
   8  10  -1    2.10    8.10
  -8 -10   1    5.90   43.40
  -8 -10   1    4.00   23.50
  -8 -10   1   30.10   39.60
   7  10  -1   20.70    7.20
   7  10  -1   13.80    4.30
   7  10  -1   24.30    5.90
   7  10  -1   28.60    8.00
  -7 -10   1   86.19   35.90
  -7 -10   1   38.60   27.50
  -7 -10   1   47.70   19.80
   6  10  -1   76.39   11.20
   6  10  -1   78.29   12.20
   6  10  -1   75.99   12.70
  -6 -10   1   31.40   18.50
  -6 -10   1   92.79   19.60
  -6 -10   1  105.39   33.70
   5  10  -1    1.40    5.50
   5  10  -1    4.70    3.50
   5  10  -1    7.00    5.20
   5  10  -1   -2.20    5.90
  -5 -10   1    8.20   32.70
  -5 -10   1    7.00   10.90
  -5 -10   1    1.70   13.60
   4  10  -1    0.40    6.00
   4  10  -1    5.00    5.00
   4  10  -1    2.30    5.10
  -4 -10   1    0.70   12.00
  -4 -10   1    0.50    9.00
   3  10  -1  104.79   15.80
   3  10  -1  124.79   12.90
   3  10  -1  118.39   13.60
   3  10  -1  119.39   13.50
  -3 -10   1   91.79   15.60
  -3 -10   1  160.98   32.90
  -3 -10   1   80.49   15.80
   2  10  -1  103.99   11.40
   2  10  -1   86.89   13.70
   2  10  -1   98.29   11.90
   2  10  -1   93.49   12.60
   2  10  -1  128.49   24.70
  -2 -10   1   53.09   20.60
  -2 -10   1   74.49   14.80
  -2 -10   1   54.59   39.40
  -2 -10   1   86.69   13.60
   1  10  -1  640.44   71.49
   1  10  -1  712.63   70.99
   1  10  -1  775.52   70.79
  -1 -10   1  704.23   71.09
  -1 -10   1  679.13   70.19
  -1 -10   1  688.33   71.89
  -1 -10   1  753.52   70.09
   0  10  -1    3.70    5.90
   0  10  -1   13.50    5.70
   0  10  -1    4.10   11.10
   0  10  -1   -5.10    6.90
   0  10  -1   14.50    5.00
   0  10  -1  -20.20   30.20
   0 -10   1    5.30    9.10
   0 -10   1   -4.10    5.90
   0 -10   1    2.10    6.70
   0 -10   1   12.90    4.30
   0 -10   1    5.30   44.50
  -1  10  -1   65.89   11.40
  -1  10  -1   84.69   13.00
  -1  10  -1   78.79   17.20
  -1  10  -1  126.19   35.50
   1 -10   1   90.69   12.00
   1 -10   1   77.19   11.10
   1 -10   1   69.29   12.40
   1 -10   1   74.39   15.40
   1 -10   1   51.69   52.19
  -2  10  -1  815.92   83.79
  -2  10  -1  911.31   82.69
  -2  10  -1  823.32   82.79
   2 -10   1  880.21   83.39
   2 -10   1  865.31   86.29
   2 -10   1  761.22   83.69
   2 -10   1  758.52   83.09
  -3  10  -1  386.16   46.00
  -3  10  -1  483.65   44.30
  -3  10  -1  439.76   44.60
   3 -10   1  404.06   46.20
   3 -10   1  451.65   45.50
   3 -10   1  431.56   46.20
   3 -10   1  511.15   51.39
  -4  10  -1  636.74   72.29
  -4  10  -1  658.83   70.99
   4 -10   1  700.63   86.69
   4 -10   1  756.22   72.19
   4 -10   1  765.32   72.39
   4 -10   1  761.32   72.99
  -5  10  -1  107.79   45.10
  -5  10  -1  175.78   19.60
   5 -10   1  152.48   28.50
   5 -10   1  190.68   23.70
   5 -10   1  228.68   41.10
   5 -10   1  196.38   21.60
   5 -10   1  178.98   33.70
  -6  10  -1  168.68   25.00
  -6  10  -1   97.59   46.80
  -6  10  -1  207.58   21.80
   6 -10   1  205.28   26.60
   6 -10   1  315.07   49.30
   6 -10   1  214.28   24.30
   6 -10   1  215.78   31.30
  -7  10  -1   40.10   53.79
  -7  10  -1   79.79   14.10
   7 -10   1   76.99   23.50
   7 -10   1   86.59   16.90
   7 -10   1   83.99   15.70
   7 -10   1   87.09   32.20
  -8  10  -1  -17.40   35.30
  -8  10  -1  -13.90   57.69
  -8  10  -1   -2.70    7.20
  -8  10  -1   -8.10   12.10
   8 -10   1    7.10   31.50
   8 -10   1  -31.50   29.10
   8 -10   1   10.90   18.60
   8 -10   1   -4.50   12.80
  -9  10  -1  106.79   67.19
  -9  10  -1   99.29   19.50
  -9  10  -1  136.79   17.50
   9 -10   1  105.09   25.00
   9 -10   1   92.19   33.30
 -10  10  -1   32.30   69.69
 -10  10  -1  114.89   58.29
 -10  10  -1   36.40   20.20
 -10  10  -1   39.20   13.00
  10 -10   1   16.30   28.20
  10 -10   1   19.50   25.20
   9   9  -1   13.80    5.50
   9   9  -1    6.80    5.20
   9   9  -1    7.60    6.80
   9   9  -1    3.20    8.20
  -9  -9   1   26.20   29.50
  -9  -9   1    8.60   38.60
   8   9  -1  114.29   14.90
   8   9  -1  134.29   16.60
   8   9  -1  162.88   17.80
  -8  -9   1  246.78   44.40
  -8  -9   1  256.97   43.40
   7   9  -1  395.06   42.10
   7   9  -1  388.16   42.10
   7   9  -1  436.26   41.60
  -7  -9   1  402.36   49.20
  -7  -9   1  490.35   57.99
   6   9  -1   10.70    5.80
   6   9  -1   12.40    5.80
   6   9  -1    7.40    3.30
   6   9  -1   12.70    5.20
  -6  -9   1   15.50   15.60
  -6  -9   1   14.80   26.80
  -5  -9   1  472.55   46.50
  -5  -9   1  387.96   49.10
   4   9  -1   25.20    4.80
   4   9  -1   46.90    6.80
   4   9  -1   40.30    6.10
  -4  -9   1   29.00    8.80
  -4  -9   1   43.40   12.00
  -4  -9   1   15.40   27.50
   3   9  -1  677.43   64.69
   3   9  -1  687.23   64.89
   3   9  -1  664.23   65.09
   3   9  -1  643.64   64.99
  -3  -9   1  594.74   66.29
  -3  -9   1  603.44   75.29
   2   9  -1   18.50    5.40
   2   9  -1   28.70   18.60
   2   9  -1   20.10    6.40
   2   9  -1   18.40    4.70
   2   9  -1   23.10    5.00
  -2  -9   1   27.80   18.70
  -2  -9   1   23.60    8.30
  -2  -9   1   33.80   27.60
  -2  -9   1   24.20    6.60
   1   9  -1  966.20   82.69
   1   9  -1  784.62   82.89
   1   9  -1  898.91   82.79
  -1  -9   1  778.42   82.99
  -1  -9   1  846.62   83.59
  -1  -9   1  722.73   82.29
   0   9  -1  757.72   68.49
   0   9  -1  648.54   69.09
   0   9  -1  673.93   68.79
   0   9  -1  778.92   70.19
   0   9  -1  777.82   68.79
   0   9  -1  587.74   73.39
   0  -9   1  610.44   68.79
   0  -9   1  635.94   69.49
  -1   9  -1 3385.96  340.27
  -1   9  -1 3543.35  338.67
  -1   9  -1 3728.83  338.67
  -1   9  -1 3698.53  339.27
   1  -9   1 3374.86  338.67
   1  -9   1 3177.58  338.97
   1  -9   1 3131.69  338.67
  -2   9  -1  116.99   29.50
  -2   9  -1   48.60    8.70
  -2   9  -1   66.39    8.90
  -2   9  -1   82.29   18.70
  -2   9  -1   51.69   10.10
   2  -9   1   55.19    9.10
   2  -9   1   61.79    9.90
   2  -9   1   -4.80   39.40
  -3   9  -1  345.37   31.70
  -3   9  -1  305.87   33.30
  -3   9  -1  281.17   45.20
  -3   9  -1  267.37   31.40
   3  -9   1  294.87   33.60
   3  -9   1  341.77   32.50
   3  -9   1  310.37   33.00
  -4   9  -1   45.30    7.90
  -4   9  -1   -1.00   25.90
  -4   9  -1  117.39   39.20
  -4   9  -1   90.39   16.60
  -4   9  -1   43.50    9.50
   4  -9   1   55.39    9.50
   4  -9   1   41.40   10.50
   4  -9   1   55.09    9.50
   4  -9   1   63.99   26.10
  -5   9  -1   47.50    8.20
  -5   9  -1   52.99   10.00
  -5   9  -1   97.79   26.70
  -5   9  -1   14.70   35.60
   5  -9   1   55.39   13.90
   5  -9   1   48.30   10.00
   5  -9   1   55.29   10.20
   5  -9   1   86.69   27.40
   5  -9   1   58.99   21.30
  -6   9  -1   36.40   41.80
  -6   9  -1   60.39    8.90
  -6   9  -1   48.70   10.70
  -6   9  -1   34.50   26.60
   6  -9   1   49.10   11.00
   6  -9   1   55.69   11.20
   6  -9   1   83.39   29.70
   6  -9   1   45.60   18.80
   6  -9   1   74.49   18.10
  -7   9  -1   10.60    5.40
  -7   9  -1   31.70   47.70
  -7   9  -1  -24.70   27.00
  -7   9  -1    2.90    9.30
   7  -9   1   16.70   10.70
   7  -9   1   32.10   28.50
   7  -9   1    4.50   10.90
   7  -9   1   26.00   20.70
  -8   9  -1   25.50   12.30
  -8   9  -1   47.30   52.49
  -8   9  -1   51.09    8.60
  -8   9  -1  133.89   39.90
   8  -9   1   38.30   26.50
   8  -9   1   60.49   15.50
   8  -9   1   73.99   15.50
   8  -9   1   48.90   24.70
  -9   9  -1    8.20    8.60
  -9   9  -1   17.90   12.60
   9  -9   1   17.50   18.10
   9  -9   1  -25.50   41.10
   9  -9   1   -1.50   27.80
 -10   9  -1   65.89   13.30
 -10   9  -1   56.89   57.49
 -10   9  -1  -20.30   61.79
 -10   9  -1   62.49   19.90
  10  -9   1   45.50   23.90
  10  -9   1   28.70   22.20
  10   8  -1   40.00    6.90
  10   8  -1   10.40    8.60
  10   8  -1   30.90    7.70
  10   8  -1   32.20    7.70
 -10  -8   1   83.99   41.80
 -10  -8   1   67.69   35.60
   9   8  -1  135.79   16.00
   9   8  -1  140.09   17.30
   9   8  -1  139.59   15.50
  -9  -8   1  203.68   32.60
   8   8  -1  365.96   37.00
   8   8  -1  363.46   37.60
  -8  -8   1  374.26   47.60
  -8  -8   1  361.36   62.99
   7   8  -1   69.69   11.60
   7   8  -1   87.59   12.00
   7   8  -1   90.59    9.90
  -7  -8   1   75.79   26.50
  -7  -8   1   58.99   28.70
  -7  -8   1   51.29   23.60
   6   8  -1   26.80    5.80
   6   8  -1   24.30    4.70
   6   8  -1   20.00    6.60
  -6  -8   1   39.30   15.60
  -6  -8   1   24.50   23.10
  -6  -8   1   16.20   12.70
   5   8  -1  864.41   80.09
   5   8  -1  824.02   79.99
   5   8  -1  749.03   79.89
  -5  -8   1  774.32   81.89
  -5  -8   1  809.42   81.39
   4   8  -1    7.80    4.50
   4   8  -1    3.60    9.90
   4   8  -1    0.70    4.20
   4   8  -1    3.40    3.80
  -4  -8   1    9.80    8.70
  -4  -8   1  -12.40   18.30
  -4  -8   1    4.80   21.50
   3   8  -1  499.35   49.80
   3   8  -1  487.25   45.30
   3   8  -1  413.96   45.30
   3   8  -1  491.75   45.30
  -3  -8   1  441.16   47.20
  -3  -8   1  383.56   45.70
   2   8  -1  205.28   23.30
   2   8  -1  218.98   22.80
   2   8  -1  230.38   23.00
   2   8  -1  198.98   23.20
   2   8  -1  250.97   32.70
  -2  -8   1  219.98   25.10
  -2  -8   1  252.57   23.40
   1   8  -1 1100.49  101.89
   1   8  -1  989.70  102.19
   1   8  -1 1130.09  102.59
   1   8  -1 1050.09  102.69
  -1  -8   1  949.21  101.69
  -1  -8   1  960.10  102.09
   0   8  -1  133.49   18.30
   0   8  -1  160.98   15.30
   0   8  -1  101.09   17.60
   0   8  -1  121.19   15.60
   0   8  -1  146.29   15.10
   0  -8   1  140.99   14.60
   0  -8   1  146.39   16.50
   0  -8   1  138.29   15.10
  -1   8  -1  -17.10   22.20
  -1   8  -1   -0.10    5.20
  -1   8  -1    3.70    4.60
  -1   8  -1    3.90    4.80
  -1   8  -1   -6.60   10.10
   1  -8   1    7.40    5.60
   1  -8   1    6.00    5.00
   1  -8   1    6.00    4.10
   1  -8   1   19.30   33.60
  -2   8  -1   37.30   23.90
  -2   8  -1   16.10    6.50
  -2   8  -1    9.70    6.00
  -2   8  -1    0.30   13.60
   2  -8   1   20.30    4.60
   2  -8   1    5.50    5.70
   2  -8   1   -9.30   30.10
   2  -8   1   22.20    5.60
  -3   8  -1  581.74   63.29
  -3   8  -1  624.64   62.59
   3  -8   1  709.43   63.19
   3  -8   1  636.64   63.19
   3  -8   1  597.24   63.59
  -4   8  -1  600.54   62.09
  -4   8  -1  604.64   62.89
   4  -8   1  625.14   62.89
   4  -8   1  675.73   62.79
   4  -8   1  667.73   63.79
   4  -8   1  558.14   69.09
  -5   8  -1  257.17   28.10
  -5   8  -1  251.47   29.10
   5  -8   1  303.97   29.20
   5  -8   1  275.37   31.80
   5  -8   1  299.17   29.30
  -6   8  -1  457.45   46.70
  -6   8  -1  470.05   48.10
   6  -8   1  440.96   48.20
   6  -8   1  511.35   51.89
   6  -8   1  455.55   47.70
   6  -8   1  508.95   52.69
   6  -8   1  423.26   59.09
  -7   8  -1   -1.70   24.80
  -7   8  -1  -27.60   38.90
  -7   8  -1   22.80    5.50
  -7   8  -1    9.10   27.40
  -7   8  -1   20.40    8.00
   7  -8   1   16.00   20.10
   7  -8   1   16.40   20.80
   7  -8   1   18.90   14.30
  -8   8  -1  349.17   41.50
  -8   8  -1  501.25   73.09
  -8   8  -1  385.66   44.00
   8  -8   1  448.46   55.99
   8  -8   1  446.46   45.20
   8  -8   1  433.86   44.10
  -9   8  -1    0.20   13.90
  -9   8  -1    2.00   49.70
  -9   8  -1    6.00    8.00
  -9   8  -1  -48.30   46.30
   9  -8   1    9.80   15.80
   9  -8   1  -27.30   37.00
   9  -8   1  -12.90   21.00
 -10   8  -1   -3.90   11.20
 -10   8  -1    8.60   17.80
 -10   8  -1  -33.70   53.09
 -10   8  -1    6.60   61.39
  10  -8   1  -14.00   20.00
  10  -8   1  -19.50   19.90
  10   7  -1    0.00    6.30
  10   7  -1    1.80    5.40
  10   7  -1    2.90    7.80
  10   7  -1    9.80    6.40
 -10  -7   1   26.70   32.90
 -10  -7   1   42.40   31.00
 -10  -7   1   17.10   34.90
   9   7  -1   15.80    7.40
   9   7  -1   16.70    6.30
   9   7  -1   13.50    5.00
  -9  -7   1  -14.20   26.90
  -9  -7   1  -10.90   39.70
  -9  -7   1   35.00   25.80
  -9  -7   1   34.20   26.10
   8   7  -1   11.70    5.80
   8   7  -1    6.60    4.20
   8   7  -1    4.10    6.30
  -8  -7   1   18.90   23.90
  -8  -7   1   19.10   19.70
  -8  -7   1   -2.90   29.50
   7   7  -1   38.20    7.80
   7   7  -1   57.09    8.90
   7   7  -1   36.80    6.80
   7   7  -1   43.30    7.00
  -7  -7   1   12.90   22.90
  -7  -7   1    0.30   20.30
  -7  -7   1   17.40   19.90
  -7  -7   1   33.30   16.20
   6   7  -1  284.87   25.80
   6   7  -1  231.18   25.50
   6   7  -1  236.48   25.00
   6   7  -1  257.27   25.50
  -6  -7   1  204.68   35.80
  -6  -7   1  193.38   30.20
   5   7  -1   33.20    9.20
   5   7  -1   34.10    5.50
   5   7  -1   39.10    5.50
   5   7  -1   46.90    6.90
  -5  -7   1   15.60   16.10
  -5  -7   1   36.40   11.70
  -5  -7   1   39.20   14.90
  -5  -7   1   47.60   10.30
  -5  -7   1    2.50   17.30
   4   7  -1   53.09   10.30
   4   7  -1   55.59    7.30
   4   7  -1   62.99    6.90
   4   7  -1   47.10    6.70
  -4  -7   1   22.60   16.00
  -4  -7   1   18.50   16.20
  -4  -7   1   39.20    8.30
  -4  -7   1   43.30   10.90
   3   7  -1   11.70    4.00
   3   7  -1   18.80    3.60
   3   7  -1   17.80    3.90
   3   7  -1   20.40   10.70
  -3  -7   1   21.60    5.40
  -3  -7   1   27.10    8.30
  -3  -7   1    9.60   16.20
  -3  -7   1   -8.80   16.60
   2   7  -1 1523.45  150.68
   2   7  -1 1513.15  147.99
   2   7  -1 1614.14  147.89
   2   7  -1 1418.06  147.89
  -2  -7   1 1421.46  148.09
   1   7  -1  359.06   34.10
   1   7  -1  323.27   35.00
   1   7  -1  346.47   35.30
   1   7  -1  315.57   34.40
   1   7  -1  330.17   34.40
  -1  -7   1  333.77   34.10
  -1  -7   1  361.26   34.60
  -1  -7   1  375.66   35.50
   0   7  -1  153.58   20.10
   0   7  -1  192.08   18.50
   0   7  -1  205.08   18.40
   0   7  -1  195.48   19.00
   0  -7   1  152.38   18.20
   0  -7   1  166.48   18.20
   0  -7   1  162.88   18.80
  -1   7  -1   42.60   22.30
  -1   7  -1   23.40    4.10
  -1   7  -1    9.90    9.30
  -1   7  -1   10.90    7.20
  -1   7  -1   18.30    5.80
  -1   7  -1   13.20    5.00
  -1   7  -1   12.70    4.50
   1  -7   1   11.60    4.00
   1  -7   1   15.60    3.90
   1  -7   1    9.00   27.80
   1  -7   1   38.30   11.50
   1  -7   1   13.10    5.10
  -2   7  -1  905.11   91.49
  -2   7  -1  937.41   91.79
  -2   7  -1  812.92   90.79
  -2   7  -1  983.00   90.79
   2  -7   1  922.61   91.19
   2  -7   1  980.60   91.19
   2  -7   1  889.01   91.39
  -3   7  -1 1152.98  108.09
  -3   7  -1  994.30  108.29
   3  -7   1 1167.88  108.59
   3  -7   1 1069.09  109.19
  -4   7  -1  240.08   25.40
  -4   7  -1  164.18   18.70
  -4   7  -1  169.28   19.70
   4  -7   1  201.08   20.00
   4  -7   1  182.38   19.50
   4  -7   1  165.08   21.20
   4  -7   1  187.48   28.90
  -5   7  -1  825.22   84.49
  -5   7  -1  811.72   83.79
   5  -7   1  840.02   84.19
   5  -7   1  860.11   86.39
   5  -7   1  904.91   86.99
  -6   7  -1  306.67   38.20
  -6   7  -1  216.28   24.20
  -6   7  -1  188.78   22.90
   6  -7   1  220.58   24.40
   6  -7   1  227.38   24.80
   6  -7   1  265.27   28.40
  -7   7  -1    8.00   14.30
  -7   7  -1   16.70   19.90
  -7   7  -1   56.79   28.40
  -7   7  -1   12.10    4.80
  -7   7  -1  -24.70   33.70
   7  -7   1    3.70   16.90
   7  -7   1    7.70    7.70
   7  -7   1   16.60    9.10
   7  -7   1    2.70   11.40
   7  -7   1   27.00   20.30
  -8   7  -1   20.50   40.20
  -8   7  -1   -1.30   21.40
  -8   7  -1   18.50    9.70
  -8   7  -1    4.40    6.00
  -8   7  -1    2.70   36.10
   8  -7   1    2.10    9.90
   8  -7   1    3.90   16.50
   8  -7   1    3.60   11.50
   8  -7   1  -17.20   22.60
   8  -7   1    3.90   14.90
  -9   7  -1   -5.40    7.70
  -9   7  -1   -6.40   13.30
  -9   7  -1  -45.00   37.10
  -9   7  -1  -54.79   40.70
   9  -7   1    0.40   15.00
   9  -7   1  -19.50   24.80
   9  -7   1    5.30   14.10
   9  -7   1    1.20   15.60
 -10   7  -1  169.08   23.70
 -10   7  -1  172.38   25.70
 -10   7  -1  150.28   49.50
 -10   7  -1  350.26   71.59
  10  -7   1  141.69   25.90
  10  -7   1  155.98   26.60
 -11   7  -1  -16.00   16.70
 -11   7  -1  -15.90   71.89
 -11   7  -1  -21.80   44.70
 -11   7  -1    0.00   22.30
  11  -7   1    4.70   15.10
  11   6  -1   13.90    7.20
  11   6  -1   18.60    7.10
  10   6  -1   75.79   13.30
  10   6  -1   56.49    9.90
  10   6  -1   69.69   10.50
 -10  -6   1   49.30   30.90
 -10  -6   1  132.29   33.60
 -10  -6   1   66.39   29.80
   9   6  -1  134.09   14.80
   9   6  -1  105.29   13.10
   9   6  -1   80.79   15.70
   9   6  -1  106.79   12.40
  -9  -6   1   98.79   28.20
  -9  -6   1  118.89   26.10
  -9  -6   1   54.59   26.80
  -9  -6   1   38.80   35.40
   8   6  -1  185.18   20.30
   8   6  -1  201.68   19.90
   8   6  -1  176.78   21.00
   8   6  -1  179.78   19.20
  -8  -6   1  186.08   31.60
  -8  -6   1  158.88   32.80
  -8  -6   1  137.39   28.70
   7   6  -1    8.80    5.60
   7   6  -1   19.30    5.00
   7   6  -1   14.50    4.40
   7   6  -1    4.50    4.90
   7   6  -1   20.00    5.50
  -7  -6   1   12.50   15.50
  -7  -6   1   39.50   15.10
  -7  -6   1   -2.30   18.50
  -7  -6   1    0.60   18.20
   6   6  -1 1374.06  129.39
   6   6  -1 1218.88  129.39
   6   6  -1 1397.76  129.19
   6   6  -1 1400.56  129.29
  -6  -6   1 1081.19  131.79
  -6  -6   1 1253.77  132.69
  -6  -6   1 1393.76  131.29
   5   6  -1   -1.70    3.30
   5   6  -1   -9.30    6.40
   5   6  -1    3.50    2.90
  -5  -6   1   -7.70   13.50
  -5  -6   1   -0.70   12.50
  -5  -6   1    8.40    8.90
  -5  -6   1    1.20    8.50
   4   6  -1 2201.08  240.28
   4   6  -1 2721.63  239.98
   4   6  -1 2342.17  240.38
   4   6  -1 2584.54  241.18
   4   6  -1 2331.27  240.28
  -4  -6   1 2409.86  240.68
  -4  -6   1 2472.35  241.18
   3   6  -1  313.27   32.10
   3   6  -1  315.27   32.20
   3   6  -1  335.57   35.20
   3   6  -1  325.17   32.30
  -3  -6   1  338.97   33.90
  -3  -6   1  304.17   32.50
   2   6  -1   96.69   21.50
   2   6  -1  150.68   14.70
   2   6  -1  127.59   14.70
   2   6  -1  165.68   14.90
  -2  -6   1  144.19   15.10
  -2  -6   1  128.69   16.10
   1   6  -1  172.98   18.10
   1   6  -1  188.28   17.70
   1   6  -1  146.29   28.40
   1   6  -1  170.78   17.90
   1   6  -1  150.48   18.60
   1   6  -1  158.88   17.90
  -1  -6   1  175.28   18.50
  -1  -6   1  182.88   17.40
  -1  -6   1  181.78   18.00
   0   6  -1 3806.42  443.16
   0   6  -1 4179.88  442.96
   0   6  -1 4905.91  442.86
   0   6  -1 4119.09  443.06
   0   6  -1 4372.06  442.76
   0   6  -1 4850.21  442.96
   0  -6   1 4787.02  442.86
   0  -6   1 4579.04  442.76
   0  -6   1 4862.21  443.06
  -1   6  -1  492.75   47.80
  -1   6  -1  422.16   48.60
  -1   6  -1  451.85   49.80
  -1   6  -1  481.45   48.20
  -1   6  -1  503.35   48.50
   1  -6   1  495.35   47.90
   1  -6   1  505.95   48.00
   1  -6   1  479.65   48.00
  -2   6  -1 2146.39  211.58
  -2   6  -1 2043.60  210.98
  -2   6  -1 1983.00  210.68
  -2   6  -1 2102.19  210.48
   2  -6   1 2314.27  210.88
   2  -6   1 2364.66  210.88
   2  -6   1 2011.40  211.08
  -3   6  -1   36.70    5.90
  -3   6  -1   43.90   15.90
  -3   6  -1   26.90    9.10
  -3   6  -1   29.50    3.70
  -3   6  -1   27.70   15.60
  -3   6  -1   35.00    4.80
   3  -6   1   18.70    6.10
   3  -6   1   24.80    5.10
   3  -6   1   34.60    5.90
  -4   6  -1  311.67   33.80
  -4   6  -1  347.57   33.60
  -4   6  -1  311.57   34.80
  -4   6  -1  355.76   37.80
   4  -6   1  391.26   34.40
   4  -6   1  333.47   38.50
   4  -6   1  353.36   36.30
   4  -6   1  311.27   34.50
  -5   6  -1    1.70   15.20
  -5   6  -1   15.90   24.00
  -5   6  -1    2.50    3.00
  -5   6  -1   -4.10   14.50
  -5   6  -1    7.10    4.30
  -5   6  -1   15.30    5.50
   5  -6   1    8.00    4.70
   5  -6   1   -0.30    4.40
   5  -6   1   11.70    9.40
   5  -6   1    2.60   10.80
  -6   6  -1   76.29   21.80
  -6   6  -1   44.20   16.70
  -6   6  -1   55.29   27.70
  -6   6  -1   35.60    8.20
  -6   6  -1   43.40    6.40
   6  -6   1   46.50    7.70
   6  -6   1   33.00   15.30
   6  -6   1   37.20   10.00
   6  -6   1   49.60    7.50
  -7   6  -1  341.97   50.09
  -7   6  -1  365.26   44.00
  -7   6  -1  351.36   36.40
  -7   6  -1  343.67   54.19
  -7   6  -1  368.06   38.00
   7  -6   1  277.57   43.40
   7  -6   1  384.56   38.20
   7  -6   1  363.36   37.10
   7  -6   1  389.26   39.20
  -8   6  -1  -60.39   34.40
  -8   6  -1   32.20   13.80
  -8   6  -1   23.60   30.90
  -8   6  -1   10.80   16.50
  -8   6  -1   12.80    6.10
  -8   6  -1   12.80   10.80
   8  -6   1   11.10   15.50
   8  -6   1  -32.60   20.60
   8  -6   1   15.70   10.30
   8  -6   1    4.70    9.20
  -9   6  -1   -5.60   12.60
  -9   6  -1  -56.49   40.60
  -9   6  -1  -23.90   36.00
  -9   6  -1    3.60   18.40
  -9   6  -1    7.20    8.30
   9  -6   1   14.40   14.10
   9  -6   1    2.30   14.80
   9  -6   1  -31.80   23.20
 -10   6  -1   54.29   12.90
 -10   6  -1    1.60   60.79
 -10   6  -1   45.00   42.30
  10  -6   1  -43.50   23.30
  10  -6   1   20.10   14.30
  10  -6   1   54.89   18.20
 -11   6  -1   13.30   17.50
 -11   6  -1    5.60   81.39
 -11   6  -1   27.70   20.30
 -11   6  -1   15.80   44.10
  11  -6   1  -15.90   19.10
  11  -6   1  -14.10   14.80
  11   5  -1   14.90    6.80
  11   5  -1    2.60    9.10
  11   5  -1   12.10    7.50
 -11  -5   1    0.40   32.30
 -11  -5   1   -3.40   30.60
 -11  -5   1   29.20   35.40
  10   5  -1   11.00   10.20
  10   5  -1   11.00    5.90
  10   5  -1    8.80    7.20
  10   5  -1    7.70    5.60
 -10  -5   1   17.40   24.00
 -10  -5   1   14.30   25.90
 -10  -5   1   19.00   28.60
   9   5  -1  595.94   59.39
   9   5  -1  588.84   58.99
   9   5  -1  649.43   58.79
   9   5  -1  579.54   59.99
  -9  -5   1  471.05   67.69
  -9  -5   1  586.44   74.09
  -9  -5   1  670.43   71.39
  -9  -5   1  526.55   66.59
   8   5  -1  297.67   31.70
   8   5  -1  319.87   30.20
   8   5  -1  300.57   30.60
   8   5  -1  260.37   29.50
  -8  -5   1  331.37   39.60
  -8  -5   1  240.68   38.80
   7   5  -1  200.98   21.80
   7   5  -1  231.78   23.60
   7   5  -1  209.28   22.20
   7   5  -1  216.18   22.90
   7   5  -1  231.88   23.10
   7   5  -1  211.18   22.50
  -7  -5   1  183.38   30.60
  -7  -5   1  205.58   29.10
   6   5  -1 1001.00   91.49
   6   5  -1  959.90   91.89
   6   5  -1  927.61   91.59
   6   5  -1  869.51   92.29
   6   5  -1  958.70   91.79
   6   5  -1  859.61   91.79
  -6  -5   1  831.02   94.09
  -6  -5   1  982.90   93.69
   5   5  -1   19.50    3.70
   5   5  -1   19.50    4.00
   5   5  -1   23.50    3.90
   5   5  -1   17.60    3.60
   5   5  -1   18.20    3.80
   5   5  -1   11.20    6.10
   5   5  -1   19.50    3.90
  -5  -5   1    4.50   10.10
  -5  -5   1   17.80    9.20
  -5  -5   1   32.30    9.10
  -5  -5   1    5.00   10.60
  -5  -5   1   17.50   12.20
   4   5  -1  791.92   77.99
   4   5  -1  786.92   78.79
   4   5  -1  703.03   77.89
   4   5  -1  829.02   77.89
   4   5  -1  819.02   77.79
  -4  -5   1  791.42   78.49
   3   5  -1   19.80    3.00
   3   5  -1   15.50    3.40
   3   5  -1   20.40    2.90
   3   5  -1    0.70    7.10
   3   5  -1   17.70    3.00
  -3  -5   1    7.40    6.60
  -3  -5   1   16.50   10.50
  -3  -5   1   16.30    4.30
  -3  -5   1    0.80   10.80
  -3  -5   1   20.10    6.50
   2   5  -1 2533.25  260.07
   2   5  -1 2719.73  260.07
   2   5  -1 2350.46  262.17
   2   5  -1 2702.43  259.97
  -2  -5   1 2899.91  260.57
  -2  -5   1 2620.64  260.07
   1   5  -1  391.86   36.60
   1   5  -1  360.66   36.50
   1   5  -1  416.96   42.60
   1   5  -1  375.16   36.60
   1   5  -1  335.27   36.50
  -1  -5   1  389.96   36.60
  -1  -5   1  322.67   36.20
  -1  -5   1  300.17   42.20
  -1  -5   1  401.46   36.90
   0   5  -1   28.00    4.80
   0   5  -1   18.40    4.90
   0   5  -1   14.90    3.40
   0   5  -1   19.80   15.20
   0   5  -1   17.40    4.10
   0   5  -1   21.30    4.70
   0   5  -1   33.70    4.30
   0  -5   1   18.10   16.20
   0  -5   1   21.30    4.20
   0  -5   1   25.60    3.60
   0  -5   1   35.20    6.20
   0  -5   1   22.90    3.90
   0  -5   1    9.40    4.50
  -1   5  -1   43.60    9.80
  -1   5  -1   45.20    7.20
  -1   5  -1   59.89    6.70
  -1   5  -1   49.30    7.30
  -1   5  -1   65.59    8.90
  -1   5  -1   53.09    9.20
   1  -5   1   72.29    6.70
   1  -5   1   70.59    7.00
  -2   5  -1  170.48   17.00
  -2   5  -1  158.58   21.20
  -2   5  -1  177.48   17.30
  -2   5  -1  148.59   19.60
  -2   5  -1  147.89   17.90
   2  -5   1  181.88   18.30
   2  -5   1  195.18   17.60
  -3   5  -1  192.08   25.70
  -3   5  -1  236.58   23.00
   3  -5   1  237.48   24.70
   3  -5   1  222.48   23.30
   3  -5   1  246.98   23.30
  -4   5  -1  358.66   37.70
  -4   5  -1  420.86   36.90
  -4   5  -1  361.66   36.90
   4  -5   1  347.87   37.30
   4  -5   1  351.36   39.60
   4  -5   1  329.77   39.20
   4  -5   1  408.96   37.30
  -5   5  -1  205.08   21.00
  -5   5  -1  234.18   21.70
  -5   5  -1  205.18   22.00
  -5   5  -1  182.98   28.20
   5  -5   1  209.08   26.40
   5  -5   1  197.68   23.60
   5  -5   1  190.98   21.80
   5  -5   1  204.38   21.40
  -6   5  -1  594.44   53.59
  -6   5  -1  584.74   52.69
  -6   5  -1  381.66   64.09
  -6   5  -1  471.85   56.69
  -6   5  -1  515.05   53.29
   6  -5   1  504.95   53.39
   6  -5   1  568.14   52.89
   6  -5   1  497.75   53.89
  -7   5  -1  584.54   58.69
  -7   5  -1  549.25   57.39
  -7   5  -1  527.85   71.49
  -7   5  -1  541.95   60.99
   7  -5   1  560.44   58.59
   7  -5   1  614.84   58.89
   7  -5   1  609.74   57.69
  -8   5  -1   57.99   13.10
  -8   5  -1   88.09   31.50
  -8   5  -1   93.59   11.80
  -8   5  -1   57.89   15.10
  -8   5  -1    9.80   32.90
   8  -5   1   20.00   19.40
   8  -5   1   65.89   15.90
   8  -5   1   98.39   12.90
   8  -5   1   57.79   12.90
  -9   5  -1    3.10    9.90
  -9   5  -1   -4.80   12.90
  -9   5  -1    5.10   18.80
  -9   5  -1    9.00   33.30
  -9   5  -1  -49.90   39.40
  -9   5  -1    8.30   18.70
   9  -5   1    2.10   13.10
   9  -5   1   -7.00   11.90
   9  -5   1  -38.20   18.90
   9  -5   1    7.20    9.80
 -10   5  -1  -34.60   35.70
 -10   5  -1    8.90   17.30
 -10   5  -1    7.30   12.90
  10  -5   1  -18.40   15.60
  10  -5   1  -23.60   11.60
  10  -5   1  -14.00   19.50
 -11   5  -1    1.10   39.00
 -11   5  -1  -19.80   20.80
 -11   5  -1  -10.50   71.19
 -11   5  -1    8.90   18.40
  11  -5   1   -2.20   12.50
  11  -5   1    2.90   18.20
  11   4  -1   58.99   10.10
  11   4  -1   65.19   10.10
  11   4  -1   51.49    8.90
 -11  -4   1   45.30   30.60
 -11  -4   1   -5.50   28.40
 -11  -4   1   84.59   32.00
  10   4  -1  294.07   28.20
  10   4  -1  257.47   28.10
  10   4  -1  276.57   28.70
 -10  -4   1  312.47   44.00
 -10  -4   1  184.08   37.90
 -10  -4   1  262.67   42.10
 -10  -4   1  282.67   46.40
   9   4  -1    3.90   11.10
   9   4  -1   10.80    4.50
   9   4  -1    3.60    4.90
   9   4  -1    8.90    6.40
   9   4  -1    7.60    9.10
   9   4  -1   17.40    5.90
  -9  -4   1   11.90   26.90
  -9  -4   1   22.10   17.80
  -9  -4   1   28.70   21.50
  -9  -4   1  -15.00   19.50
  -9  -4   1   13.00   18.50
   8   4  -1   -7.10    5.10
   8   4  -1    3.10    9.50
   8   4  -1    6.00    3.30
   8   4  -1    0.20    7.50
   8   4  -1    4.90    4.40
  -8  -4   1  -11.50   14.30
  -8  -4   1  -26.00   17.00
  -8  -4   1  -10.40   14.60
  -8  -4   1  -12.10   18.40
  -8  -4   1   -0.10   14.20
   7   4  -1  140.09   16.30
   7   4  -1  120.59   13.60
   7   4  -1  154.48   14.80
   7   4  -1  122.59   14.80
   7   4  -1  129.69   18.20
  -7  -4   1  100.59   19.40
  -7  -4   1   97.89   20.30
  -7  -4   1  149.29   22.80
  -7  -4   1  181.98   23.00
  -7  -4   1  103.09   20.50
   6   4  -1  148.89   17.00
   6   4  -1  122.89   15.20
   6   4  -1  135.49   14.90
   6   4  -1  150.38   14.50
   6   4  -1  126.19   13.80
  -6  -4   1  116.99   20.70
  -6  -4   1  142.59   19.90
  -6  -4   1   93.99   17.60
   5   4  -1  263.57   29.60
   5   4  -1  304.97   30.30
   5   4  -1  322.97   29.60
   5   4  -1  281.17   29.30
  -5  -4   1  344.57   31.80
  -5  -4   1  251.47   31.50
  -5  -4   1  285.27   32.60
   4   4  -1   46.40    5.80
   4   4  -1   56.19    5.50
   4   4  -1   46.00    5.80
   4   4  -1   43.40    5.70
   4   4  -1   39.80    6.60
   4   4  -1   37.50    5.90
   4   4  -1   47.00    8.50
  -4  -4   1   30.60    9.50
  -4  -4   1   67.39   10.40
  -4  -4   1   26.00   10.40
  -4  -4   1   51.89   10.20
  -4  -4   1   44.50    7.30
   3   4  -1   40.90    5.10
   3   4  -1   39.80    5.10
   3   4  -1   44.90    5.00
   3   4  -1   35.40    4.70
   3   4  -1   57.09    8.10
  -3  -4   1   29.20    9.70
  -3  -4   1   46.90    6.20
  -3  -4   1   38.80    9.60
  -3  -4   1   23.90    8.00
  -3  -4   1   43.10    6.90
   2   4  -1  601.24   60.99
   2   4  -1  665.23   60.69
   2   4  -1  634.34   60.89
   2   4  -1  624.94   60.89
   2   4  -1  530.25   62.79
  -2  -4   1  658.03   62.99
  -2  -4   1  573.54   60.69
  -2  -4   1  700.63   61.39
  -2  -4   1  536.65   63.39
   1   4  -1 2236.48  248.98
   1   4  -1 2699.93  249.08
   1   4  -1 2514.15  249.08
  -1  -4   1 2414.86  251.27
  -1  -4   1 2628.54  249.08
  -1  -4   1 2648.54  248.88
  -1  -4   1 2846.42  249.28
  -1  -4   1 2233.68  248.78
   0   4  -1   21.60    4.00
   0   4  -1   12.10   12.00
   0   4  -1   24.60    4.10
   0   4  -1   25.00    4.30
   0   4  -1   17.40    4.90
   0   4  -1   31.50    3.90
   0  -4   1   13.80   11.60
   0  -4   1   25.50    3.30
   0  -4   1   21.90    3.40
   0  -4   1   23.40    3.50
  -1   4  -1   87.99   15.00
  -1   4  -1   94.79    9.30
  -1   4  -1   74.29   12.40
  -1   4  -1  126.69   20.30
  -1   4  -1   92.09    9.90
  -1   4  -1   83.39   10.50
  -1   4  -1   80.09    9.40
   1  -4   1   94.29    9.50
   1  -4   1   95.89    9.40
   1  -4   1   77.29   16.60
   1  -4   1   92.99    9.80
  -2   4  -1 1544.55  145.39
  -2   4  -1 1287.17  145.29
  -2   4  -1 1333.17  145.29
  -2   4  -1 1540.75  146.99
  -2   4  -1 1261.37  145.89
  -2   4  -1 1640.84  145.69
   2  -4   1 1454.65  145.99
   2  -4   1 1680.33  145.59
   2  -4   1 1548.55  145.59
  -3   4  -1  375.36   45.00
  -3   4  -1  382.66   40.20
  -3   4  -1  443.46   40.70
  -3   4  -1  403.86   40.30
   3  -4   1  369.26   41.40
   3  -4   1  431.26   40.50
   3  -4   1  424.86   40.60
  -4   4  -1  617.94   58.29
  -4   4  -1  464.05   54.89
  -4   4  -1  601.24   55.29
  -4   4  -1  538.45   54.99
   4  -4   1  514.45   55.19
   4  -4   1  570.14   57.09
   4  -4   1  598.44   56.39
  -5   4  -1   58.99   12.50
  -5   4  -1   70.59    9.40
  -5   4  -1   52.49    8.90
  -5   4  -1   55.89    7.30
   5  -4   1   56.19    8.00
   5  -4   1   56.49    8.00
   5  -4   1   65.39   13.40
   5  -4   1   68.09   10.50
  -6   4  -1  347.47   37.40
  -6   4  -1  380.06   40.70
  -6   4  -1  409.06   38.80
  -6   4  -1  301.57   48.60
  -6   4  -1  369.46   38.30
   6  -4   1  372.66   38.30
   6  -4   1  380.96   38.70
   6  -4   1  412.46   37.60
   6  -4   1  301.87   43.10
  -7   4  -1   31.00   24.10
  -7   4  -1   27.60   10.90
  -7   4  -1   21.60   10.40
  -7   4  -1   16.50    5.60
  -7   4  -1   16.40    8.80
   7  -4   1   30.60    8.10
   7  -4   1   21.60    6.30
   7  -4   1    5.00   11.90
   7  -4   1   21.70   17.70
  -8   4  -1  180.88   49.30
  -8   4  -1  306.27   31.00
  -8   4  -1  236.08   41.90
  -8   4  -1  277.47   32.50
  -8   4  -1  368.26   35.50
  -8   4  -1  299.37   33.60
   8  -4   1  315.97   31.00
   8  -4   1  286.97   32.80
   8  -4   1  244.08   34.60
  -9   4  -1   46.60   30.10
  -9   4  -1   89.89   50.19
  -9   4  -1   91.79   19.90
  -9   4  -1   42.40   14.30
   9  -4   1   63.49   11.10
   9  -4   1   39.90   13.70
   9  -4   1   33.70   14.00
 -10   4  -1  -79.69   60.79
 -10   4  -1   23.20   23.50
 -10   4  -1  -24.80   14.20
 -10   4  -1   13.60   16.40
 -10   4  -1  -28.70   30.70
  10  -4   1   -1.60   13.70
  10  -4   1  -37.20   17.50
  10  -4   1   -9.60   12.00
 -11   4  -1   -1.90   35.60
 -11   4  -1  -51.39   69.09
 -11   4  -1   18.20   19.10
 -11   4  -1    4.30   23.10
  11  -4   1   -4.00    8.10
  11  -4   1   -7.70   11.10
  11  -4   1  -15.30   16.00
  11  -4   1  -32.40   17.70
  11   3  -1   68.69   14.10
  11   3  -1   60.29   10.30
  11   3  -1   84.79   11.50
 -11  -3   1   97.59   28.80
 -11  -3   1   83.29   27.00
 -11  -3   1  111.79   34.50
  10   3  -1   14.00    6.80
  10   3  -1    9.90    5.70
  10   3  -1   -2.10    9.80
  10   3  -1  -14.90   12.80
  10   3  -1   13.60    6.20
  10   3  -1   -0.50    7.90
 -10  -3   1    6.20   36.50
 -10  -3   1   -5.30   21.10
 -10  -3   1  -22.30   21.10
 -10  -3   1    0.90   19.80
 -10  -3   1   22.10   22.30
   9   3  -1  132.69   13.40
   9   3  -1  127.89   14.60
   9   3  -1  103.69   18.00
   9   3  -1   94.69   14.70
   9   3  -1  105.39   13.50
  -9  -3   1  123.79   20.80
  -9  -3   1  112.79   28.40
  -9  -3   1  120.99   21.30
   8   3  -1  154.68   18.30
   8   3  -1  171.48   20.10
   8   3  -1  160.58   17.50
  -8  -3   1  149.99   35.40
  -8  -3   1  207.78   26.00
  -8  -3   1  147.49   24.10
   7   3  -1  505.95   61.19
   7   3  -1  630.54   59.29
   7   3  -1  688.63   59.59
  -7  -3   1  548.15   61.89
  -7  -3   1  571.04   62.29
  -7  -3   1  586.24   62.79
  -7  -3   1  600.54   61.99
   6   3  -1   93.29    9.40
   6   3  -1   76.79   14.50
   6   3  -1   77.89   11.30
   6   3  -1   79.79    9.80
   6   3  -1   74.69    9.40
  -6  -3   1   96.39   13.60
  -6  -3   1   57.59   12.40
  -6  -3   1   61.79   12.80
  -6  -3   1  102.59   15.80
  -6  -3   1   71.49   13.50
   5   3  -1  499.05   48.60
   5   3  -1  448.96   48.30
   5   3  -1  536.95   48.80
   5   3  -1  533.85   48.50
   5   3  -1  462.95   49.90
  -5  -3   1  462.75   49.90
  -5  -3   1  453.25   49.80
  -5  -3   1  473.75   50.29
   4   3  -1 1094.89  102.29
   4   3  -1 1020.20  102.29
   4   3  -1  922.51  102.59
   4   3  -1 1090.09  102.29
   4   3  -1 1216.68  102.69
  -4  -3   1  968.30  103.29
  -4  -3   1  927.91  102.59
  -4  -3   1 1020.70  103.39
  -4  -3   1 1043.50  102.89
   3   3  -1  867.21   81.99
   3   3  -1  895.01   81.99
   3   3  -1  824.92   81.89
   3   3  -1  849.12   82.59
  -3  -3   1  867.51   82.29
  -3  -3   1  705.53   82.99
  -3  -3   1  790.92   82.89
   2   3  -1   25.00    3.70
   2   3  -1   33.20    3.50
   2   3  -1   32.50    3.80
   2   3  -1   21.20    6.40
  -2  -3   1   28.40    4.20
  -2  -3   1   30.40    5.40
  -2  -3   1   31.90    6.90
  -2  -3   1   31.60    7.60
  -2  -3   1   42.60    6.30
   1   3  -1   31.20    3.90
   1   3  -1   30.90    3.40
   1   3  -1   38.60    8.90
   1   3  -1   29.30    3.30
  -1  -3   1   25.50    2.80
  -1  -3   1   30.10    8.20
  -1  -3   1   28.50    4.30
  -1  -3   1   24.10    5.90
  -1  -3   1   24.50    3.40
  -1  -3   1   26.30    3.20
  -1  -3   1   25.40    4.10
   0   3  -1 1915.41  199.98
   0   3  -1 2088.39  200.18
   0   3  -1 2087.99  200.08
   0  -3   1 1950.70  199.98
   0  -3   1 2110.49  199.98
  -1   3  -1 1684.93  152.38
  -1   3  -1 1495.05  151.48
  -1   3  -1 1655.83  151.18
  -1   3  -1 1351.66  151.18
  -1   3  -1 1587.84  151.48
  -1   3  -1 1375.86  151.48
   1  -3   1 1513.75  151.48
   1  -3   1 1779.82  151.38
   1  -3   1 1369.76  153.38
  -2   3  -1   10.30    6.60
  -2   3  -1    1.10    0.80
  -2   3  -1    1.60    3.20
  -2   3  -1   -1.40    1.90
  -2   3  -1   -3.00    5.60
  -2   3  -1    7.10    3.70
  -2   3  -1   -0.50    1.20
   2  -3   1   -0.40    6.40
   2  -3   1    2.90    1.90
   2  -3   1    5.90    3.80
   2  -3   1    2.90    1.10
  -3   3  -1  615.14   55.59
  -3   3  -1  475.45   55.99
  -3   3  -1  597.24   57.59
  -3   3  -1  471.05   56.19
   3  -3   1  578.84   56.59
   3  -3   1  614.64   55.49
   3  -3   1  563.14   55.39
  -4   3  -1    0.90    2.90
  -4   3  -1    5.70    2.80
  -4   3  -1   -0.80   11.50
  -4   3  -1    1.10    7.30
  -4   3  -1    3.10    3.60
  -4   3  -1    1.90    2.10
  -4   3  -1   -5.70    9.00
   4  -3   1    0.30    7.50
   4  -3   1    7.80    4.40
   4  -3   1    0.10    2.90
   4  -3   1    5.00    2.80
  -5   3  -1  285.67   29.70
  -5   3  -1  293.27   29.10
  -5   3  -1  297.47   29.20
  -5   3  -1  218.18   35.60
  -5   3  -1  271.57   31.50
  -5   3  -1  326.97   30.10
   5  -3   1  276.47   29.30
   5  -3   1  300.17   29.70
   5  -3   1  282.77   32.80
  -6   3  -1   10.40    6.90
  -6   3  -1   15.80    7.70
  -6   3  -1   25.00    5.50
  -6   3  -1   14.60    7.90
  -6   3  -1   13.90   18.50
  -6   3  -1  -18.50   18.70
   6  -3   1   16.50    5.50
   6  -3   1   16.30   13.70
  -7   3  -1  106.79   16.10
  -7   3  -1  108.79   25.50
  -7   3  -1  147.19   14.90
  -7   3  -1  105.19   17.00
  -7   3  -1   80.99   20.10
  -7   3  -1  105.69   15.90
  -7   3  -1  154.18   15.50
   7  -3   1  120.59   15.60
   7  -3   1  137.69   14.70
   7  -3   1   80.29   20.80
  -8   3  -1  483.15   52.59
  -8   3  -1  470.15   51.59
  -8   3  -1  452.15   71.79
  -8   3  -1  542.85   60.09
   8  -3   1  491.55   50.79
  -9   3  -1   48.90   18.90
  -9   3  -1   32.20   14.20
  -9   3  -1   39.70   26.70
  -9   3  -1   -9.70   46.50
  -9   3  -1   38.40   12.90
   9  -3   1   42.70   12.30
   9  -3   1   49.20   14.50
   9  -3   1   22.20   11.70
 -10   3  -1    3.80   23.40
 -10   3  -1  -11.80   15.00
 -10   3  -1  -81.69   57.59
 -10   3  -1   -5.10   27.00
 -10   3  -1   -3.40   15.10
  10  -3   1    5.00    5.90
  10  -3   1    4.20   10.00
  10  -3   1   -5.20   11.30
  10  -3   1  -28.10   15.30
  10  -3   1    0.90   12.40
 -11   3  -1    0.20   20.00
 -11   3  -1   35.60   31.70
 -11   3  -1   -0.90   19.40
 -11   3  -1  -14.30   31.30
 -11   3  -1  -94.79   93.09
  11  -3   1    1.60   14.20
  11  -3   1   -7.70    8.20
  11  -3   1  -12.50   15.50
  11   2  -1    9.30    7.50
  11   2  -1   -3.70   11.60
  11   2  -1   -9.90   14.20
 -11  -2   1   16.70   25.20
 -11  -2   1   23.60   25.90
  10   2  -1   89.49   12.80
  10   2  -1   94.69   11.50
  10   2  -1   80.89   14.40
 -10  -2   1   53.59   23.80
 -10  -2   1   47.90   20.20
 -10  -2   1  113.09   21.80
 -10  -2   1   63.39   22.50
   9   2  -1   47.20    7.90
   9   2  -1   49.50    8.90
   9   2  -1   32.40    6.50
   9   2  -1   44.70   11.30
  -9  -2   1   44.50   17.00
  -9  -2   1   48.50   16.10
  -9  -2   1   74.29   20.90
  -9  -2   1    7.60   23.10
  -9  -2   1    9.30   16.60
  -9  -2   1   20.10   16.80
   8   2  -1  527.35   54.99
   8   2  -1  574.54   53.69
   8   2  -1  563.24   53.29
   8   2  -1  458.05   53.69
  -8  -2   1  550.54   56.69
  -8  -2   1  601.44   59.39
  -8  -2   1  464.45   56.39
   7   2  -1   98.69   11.60
   7   2  -1  108.89   12.60
   7   2  -1  112.59   12.50
   7   2  -1  130.09   17.00
  -7  -2   1   90.19   16.20
  -7  -2   1   99.99   16.60
  -7  -2   1  118.49   18.10
  -7  -2   1  107.19   17.20
  -7  -2   1   74.09   16.10
  -7  -2   1   82.29   15.10
   6   2  -1  543.25   51.09
   6   2  -1  548.35   51.29
  -6  -2   1  483.55   53.09
  -6  -2   1  535.05   52.89
  -6  -2   1  504.75   53.09
  -6  -2   1  511.35   54.19
  -6  -2   1  475.25   52.89
  -6  -2   1  452.15   52.19
  -6  -2   1  542.75   53.09
   5   2  -1  841.02   81.59
   5   2  -1  889.01   81.69
   5   2  -1  941.71   81.89
   5   2  -1  735.23   82.89
  -5  -2   1  773.52   82.99
  -5  -2   1  761.72   82.49
  -5  -2   1  899.61   82.59
  -5  -2   1  896.51   82.69
  -5  -2   1  734.43   81.99
  -5  -2   1  768.92   82.79
   4   2  -1  274.57   30.30
   4   2  -1  341.57   29.70
   4   2  -1  303.87   29.50
   4   2  -1  281.37   29.20
  -4  -2   1  320.27   29.90
  -4  -2   1  275.47   30.20
  -4  -2   1  326.77   30.30
  -4  -2   1  270.57   30.10
  -4  -2   1  275.67   30.10
  -4  -2   1  253.07   30.00
  -4  -2   1  286.67   30.20
   3   2  -1  283.17   27.20
   3   2  -1  246.28   27.10
   3   2  -1  278.97   26.70
   3   2  -1  270.77   26.70
   3   2  -1  276.97   26.80
  -3  -2   1  242.18   26.80
  -3  -2   1  276.67   27.50
  -3  -2   1  251.87   27.60
  -3  -2   1  291.07   27.20
  -3  -2   1  266.37   27.00
  -3  -2   1  255.37   27.60
   2   2  -1  367.26   35.00
   2   2  -1  352.66   34.90
   2   2  -1  340.07   34.90
   2   2  -1  358.76   35.00
   2   2  -1  307.97   35.60
  -2  -2   1  342.07   35.90
  -2  -2   1  372.36   35.60
  -2  -2   1  363.36   35.10
  -2  -2   1  369.06   35.00
   1   2  -1   51.29    7.80
   1   2  -1   42.30    4.30
   1   2  -1   39.50    4.20
  -1  -2   1   37.40    4.20
  -1  -2   1   36.40    4.30
  -1  -2   1   47.50    5.50
   0   2  -1    1.70    2.10
   0   2  -1    4.00    1.40
   0   2  -1    2.20    4.90
   0   2  -1    2.30    1.00
   0   2  -1    5.70    2.30
   0   2  -1    1.70    1.10
   0   2  -1    3.10    1.00
   0  -2   1    3.50    1.50
   0  -2   1    1.10    1.10
   0  -2   1   11.00    5.20
   0  -2   1    9.90    2.70
  -1   2  -1   61.79    6.00
  -1   2  -1   66.69    8.10
  -1   2  -1   66.09    6.20
  -1   2  -1   52.69    6.70
   1  -2   1   50.29    6.80
   1  -2   1   55.09   10.20
  -2   2  -1   97.59   12.30
  -2   2  -1   81.79   11.30
  -2   2  -1   65.79    7.50
   2  -2   1   69.59    7.30
   2  -2   1   73.49    7.70
  -3   2  -1  339.87   31.70
  -3   2  -1  322.97   33.10
  -3   2  -1  339.57   31.40
  -3   2  -1  339.77   31.80
  -3   2  -1  283.17   31.60
   3  -2   1  261.67   33.20
   3  -2   1  294.37   32.80
   3  -2   1  336.77   31.60
  -4   2  -1  158.78   25.80
  -4   2  -1  184.18   19.90
  -4   2  -1  204.88   20.40
  -4   2  -1  178.28   19.70
  -4   2  -1  175.58   21.20
  -4   2  -1  222.48   19.50
   4  -2   1  203.78   19.60
   4  -2   1  202.08   19.90
   4  -2   1  162.58   22.90
  -5   2  -1 1739.73  169.78
  -5   2  -1 1842.12  170.38
  -5   2  -1 1637.54  172.68
  -5   2  -1 1678.33  170.08
  -5   2  -1 1762.32  170.18
  -5   2  -1 1549.54  170.08
   5  -2   1 1828.92  169.98
  -6   2  -1    2.20    4.80
  -6   2  -1    5.10    5.80
  -6   2  -1    1.40    8.00
  -6   2  -1   -2.10   13.20
  -6   2  -1  -19.60   16.40
  -6   2  -1   -1.40    5.10
  -6   2  -1    1.60    6.00
   6  -2   1  -13.30   11.10
   6  -2   1    8.80    4.30
   6  -2   1    6.70    5.30
  -7   2  -1   20.10   11.40
  -7   2  -1   41.40    7.50
  -7   2  -1  -21.30   25.50
  -7   2  -1   29.60   17.40
   7  -2   1   44.00    8.90
   7  -2   1    1.20   13.80
   7  -2   1   14.40    9.10
  -8   2  -1   46.40   37.90
  -8   2  -1   47.40   19.80
  -8   2  -1   43.30   15.90
  -8   2  -1   80.09   13.70
  -8   2  -1   84.59   13.00
  -8   2  -1   71.29   12.40
   8  -2   1   62.79   13.40
   8  -2   1   71.79   11.00
   8  -2   1   79.19   13.20
  -9   2  -1   -8.60   12.30
  -9   2  -1   13.30   21.60
  -9   2  -1  -46.80   45.10
  -9   2  -1  -11.70   12.90
  -9   2  -1   -3.80   18.00
  -9   2  -1    6.50   12.50
   9  -2   1   -4.90    9.60
   9  -2   1    0.00    6.90
   9  -2   1   -4.30    8.80
 -10   2  -1   76.29   24.60
 -10   2  -1  157.48   63.99
 -10   2  -1   73.39   18.60
 -10   2  -1   74.69   18.10
 -10   2  -1   64.19   27.20
  10  -2   1   54.19   10.30
  10  -2   1   46.40   13.10
  10  -2   1   53.19    9.50
 -11   2  -1   16.50   20.70
 -11   2  -1    0.70   22.20
 -11   2  -1  -18.00   30.30
 -11   2  -1 -112.19   68.79
  11  -2   1    9.50    9.10
  11  -2   1    1.00   12.40
  11  -2   1    2.00   10.10
  11  -2   1  -11.80   16.50
  12  -2   1   66.79   14.50
  12  -2   1   33.60   11.40
  12   1  -1   -7.10    8.80
  12   1  -1   29.90    9.40
  12   1  -1    3.30   12.30
  12   1  -1   46.70   17.60
 -12  -1   1    2.00   32.10
 -12  -1   1  -16.70   28.50
 -12  -1   1   41.20   30.40
  11   1  -1  183.58   19.00
  11   1  -1  148.79   19.60
 -11  -1   1  134.19   28.20
 -11  -1   1  147.69   31.70
 -11  -1   1  105.19   29.90
 -11  -1   1  202.48   36.60
  10   1  -1   28.30   12.20
  10   1  -1   37.10    6.90
  10   1  -1   28.50   10.80
 -10  -1   1   29.00   17.50
 -10  -1   1   27.20   20.70
 -10  -1   1   40.00   19.40
 -10  -1   1   97.69   25.80
 -10  -1   1   19.20   17.70
   9   1  -1   -0.40   14.30
   9   1  -1   12.40    4.60
   9   1  -1  -10.60    9.70
   9   1  -1    6.50    6.00
   9   1  -1   -2.30    8.20
  -9  -1   1  -30.00   14.10
  -9  -1   1  -10.60   13.80
  -9  -1   1   22.30   19.30
  -9  -1   1    9.40   14.10
   8   1  -1  122.79   14.50
   8   1  -1  104.19   18.30
   8   1  -1  125.79   13.10
  -8  -1   1  120.59   21.40
  -8  -1   1  120.09   20.10
  -8  -1   1  118.99   21.00
  -8  -1   1  126.29   20.80
  -8  -1   1  113.29   17.50
  -8  -1   1   66.59   30.40
   7   1  -1  120.49   12.70
   7   1  -1  104.19   13.60
   7   1  -1  121.79   16.60
   7   1  -1   79.49   18.90
  -7  -1   1  100.89   15.80
  -7  -1   1  119.19   24.10
  -7  -1   1  114.59   17.30
  -7  -1   1  119.19   15.90
  -7  -1   1  108.69   16.20
  -7  -1   1   81.39   15.50
   6   1  -1  146.79   14.00
   6   1  -1  126.69   14.10
   6   1  -1  100.59   19.60
   6   1  -1  131.69   16.40
  -6  -1   1  118.89   17.70
  -6  -1   1   93.99   18.00
  -6  -1   1  118.69   13.50
  -6  -1   1  122.19   16.10
  -6  -1   1  133.69   15.80
  -6  -1   1  125.49   15.40
  -6  -1   1  103.59   16.90
   5   1  -1  304.17   31.00
   5   1  -1  258.67   33.20
   5   1  -1  340.27   32.10
  -5  -1   1  315.07   31.90
  -5  -1   1  253.77   33.30
  -5  -1   1  288.77   32.30
  -5  -1   1  332.97   31.90
  -5  -1   1  298.87   32.50
  -5  -1   1  342.07   31.10
  -5  -1   1  309.17   31.50
  -5  -1   1  297.37   31.70
   4   1  -1 2692.33  263.47
   4   1  -1 2467.65  264.27
   4   1  -1 2578.04  263.77
   4   1  -1 2614.54  263.37
  -4  -1   1 2614.74  263.77
  -4  -1   1 2710.93  263.47
  -4  -1   1 2796.02  263.67
  -4  -1   1 2440.36  263.57
  -4  -1   1 2989.60  263.87
  -4  -1   1 2682.83  263.77
  -4  -1   1 2818.22  263.57
   3   1  -1    1.50    2.60
   3   1  -1    3.60    2.50
   3   1  -1    0.60    2.00
   3   1  -1   -1.80    1.70
   3   1  -1    1.00    3.10
  -3  -1   1    5.10    3.20
  -3  -1   1   -1.70    2.70
  -3  -1   1   -1.00    2.90
  -3  -1   1    3.50    2.50
  -3  -1   1    1.70    2.40
  -3  -1   1    4.50    3.20
  -3  -1   1    5.90    2.70
  -3  -1   1   -1.00    2.20
   2   1  -1   12.70    2.60
   2   1  -1    9.30    1.80
   2   1  -1    9.40    2.00
   2   1  -1   16.00    2.60
   2   1  -1   13.20    2.60
   2   1  -1   12.00    2.10
  -2  -1   1    7.00    2.40
  -2  -1   1   10.70    2.50
  -2  -1   1   13.00    2.00
  -2  -1   1   10.20    2.60
  -2  -1   1   18.10    2.70
  -2  -1   1    9.10    2.20
  -2  -1   1   11.20    2.00
  -2  -1   1   12.40    2.50
   1   1  -1   13.10    2.50
   1   1  -1   11.50    1.40
   1   1  -1   13.30    1.60
   1   1  -1   11.00    1.60
   1   1  -1   12.40    1.60
  -1  -1   1   12.50    2.40
  -1  -1   1   10.80    1.80
  -1  -1   1   15.30    2.10
  -1  -1   1   14.80    1.80
  -1  -1   1   11.80    2.10
   0   1  -1   28.20    3.00
   0   1  -1   25.60    2.90
   0   1  -1   33.40    4.30
   0   1  -1   24.20    2.90
   0  -1   1   32.00    3.10
   0  -1   1   29.20    3.30
   0  -1   1   27.40    2.90
  -1   1  -1  145.29   17.10
  -1   1  -1  168.58   16.80
  -1   1  -1  181.88   16.80
  -1   1  -1  167.18   16.60
  -1   1  -1  176.28   17.50
   1  -1   1  193.18   16.90
   1  -1   1  148.69   16.60
   1  -1   1  155.48   16.70
   1  -1   1  183.58   17.60
  -2   1  -1 2434.06  222.18
  -2   1  -1 2169.08  221.88
  -2   1  -1 2155.58  221.68
  -2   1  -1 2001.30  222.28
  -2   1  -1 2472.75  221.78
   2  -1   1 2448.85  221.78
   2  -1   1 2079.99  222.28
  -3   1  -1  407.76   37.60
  -3   1  -1  408.86   38.00
  -3   1  -1  362.66   37.70
  -3   1  -1  362.96   37.30
  -3   1  -1  334.27   39.60
   3  -1   1  420.06   37.60
   3  -1   1  367.06   39.30
   3  -1   1  337.77   37.30
  -4   1  -1 2156.58  201.98
  -4   1  -1 2124.89  201.48
  -4   1  -1 1925.91  201.68
  -4   1  -1 1950.30  203.08
  -4   1  -1 1888.21  201.38
  -4   1  -1 2138.39  201.68
  -4   1  -1 2162.98  201.78
  -4   1  -1 1844.32  201.48
   4  -1   1 2201.48  201.58
  -5   1  -1  655.63   67.39
  -5   1  -1  629.34   69.59
  -5   1  -1  723.93   67.29
  -5   1  -1  696.23   67.89
  -5   1  -1  621.24   66.89
  -5   1  -1  663.03   67.39
   5  -1   1  712.53   66.99
  -6   1  -1   -7.60    8.30
  -6   1  -1    2.00    6.20
  -6   1  -1    4.80    6.70
  -6   1  -1    9.10   20.10
  -6   1  -1    7.80    7.10
  -6   1  -1    4.20    7.00
   6  -1   1    6.80    8.90
   6  -1   1    5.70    5.00
  -7   1  -1  367.16   42.90
  -7   1  -1  328.27   39.50
  -7   1  -1  341.77   38.30
  -7   1  -1  374.66   38.20
   7  -1   1  382.16   37.30
  -8   1  -1   68.79   17.80
  -8   1  -1  113.29   17.60
  -8   1  -1  115.09   19.30
  -8   1  -1  110.79   21.40
  -8   1  -1  137.99   40.40
  -8   1  -1  114.09   18.00
  -8   1  -1  139.89   18.10
   8  -1   1   89.19   16.70
   8  -1   1   80.69   14.20
  -9   1  -1  225.18   29.90
  -9   1  -1  171.28   28.20
  -9   1  -1  251.87   27.50
  -9   1  -1  193.08   34.90
   9  -1   1  163.38   23.10
   9  -1   1  199.18   21.20
 -10   1  -1   -7.70   23.50
 -10   1  -1   14.50   17.10
 -10   1  -1    4.30   17.90
 -10   1  -1   30.70   15.70
 -10   1  -1   47.20   23.00
 -10   1  -1  -29.50   58.39
  10  -1   1   -7.50    9.80
  10  -1   1    9.20   10.50
  10  -1   1   18.70    7.10
  10  -1   1  -15.10   12.80
  10  -1   1    8.50    6.80
 -11   1  -1   22.20   22.00
 -11   1  -1  -15.00   72.89
 -11   1  -1   26.30   24.10
 -11   1  -1   27.90   28.50
 -11   1  -1   26.60   30.60
  11  -1   1   36.70    9.10
  11  -1   1    8.50   10.70
  11  -1   1   -1.90   11.30
  11  -1   1    8.20   13.50
  11  -1   1   18.40    8.20
  12  -1   1   -3.80   11.50
  12  -1   1   10.10   18.90
  12  -1   1    7.90   12.10
  12  -1   1   12.60    9.50
  12   0  -1   -0.30    8.90
  12   0  -1  -28.60   16.90
  12   0  -1    0.90   12.50
  12   0  -1    3.80   10.00
 -12   0   1   -2.00   47.70
 -12   0   1   16.30   27.70
 -12   0   1  -47.70   35.70
 -12   0   1  -21.90   27.50
  11   0  -1   51.79    9.80
  11   0  -1   59.99    9.40
  11   0  -1    6.60   17.30
  11   0  -1   33.00   13.50
 -11   0   1   62.79   21.60
 -11   0   1   67.49   31.70
 -11   0   1   84.29   23.90
 -11   0   1   40.40   25.70
  10   0  -1   12.80   11.90
  10   0  -1   32.50    6.60
  10   0  -1   -7.80   15.80
  10   0  -1   14.20   12.00
 -10   0   1   24.20   17.60
 -10   0   1   52.89   25.60
 -10   0   1   25.40   16.90
 -10   0   1   22.30   18.90
 -10   0   1   10.40   17.20
   9   0  -1   43.10   11.80
   9   0  -1   62.29    9.00
  -9   0   1   89.99   22.00
  -9   0   1  -53.19   48.70
  -9   0   1   39.00   14.20
  -9   0   1   45.00   14.70
  -9   0   1   66.49   14.70
  -9   0   1   52.39   16.50
   8   0  -1  211.28   21.90
   8   0  -1  151.48   25.20
   8   0  -1  192.18   23.20
  -8   0   1  287.87   32.10
  -8   0   1  124.09   36.60
  -8   0   1  226.28   24.70
  -8   0   1  190.58   24.90
  -8   0   1  208.28   25.80
  -8   0   1  223.08   25.50
   7   0  -1  195.88   19.20
   7   0  -1  175.58   20.40
  -7   0   1  183.98   21.30
  -7   0   1  220.38   22.60
  -7   0   1  176.28   22.10
  -7   0   1  171.18   21.20
  -7   0   1  139.59   22.10
  -7   0   1  166.68   26.20
   6   0  -1   40.10    6.30
   6   0  -1   10.80   11.80
   6   0  -1   33.50    9.50
  -6   0   1   25.60    7.90
  -6   0   1   51.09   15.40
  -6   0   1   28.00    7.30
  -6   0   1   37.10    6.60
  -6   0   1   27.70    7.10
  -6   0   1   21.90    8.20
  -6   0   1   20.40    7.80
  -6   0   1   30.10    6.60
   5   0  -1    6.30    3.60
   5   0  -1   -1.60    6.70
   5   0  -1   -3.60    7.80
  -5   0   1    1.60    9.60
  -5   0   1    0.30    3.80
  -5   0   1    4.50    3.70
  -5   0   1   11.10    5.10
  -5   0   1   -0.70    6.30
  -5   0   1    0.80    3.70
  -5   0   1    3.00    4.40
  -5   0   1    5.50    4.20
  -5   0   1   -3.00    6.30
   4   0  -1  449.66   46.20
   4   0  -1  404.46   46.20
  -4   0   1  494.15   45.30
  -4   0   1  466.35   45.50
  -4   0   1  448.16   45.50
  -4   0   1  459.25   45.50
   3   0  -1 1365.36  119.19
   3   0  -1 1105.89  119.89
   3   0  -1 1142.09  119.59
  -3   0   1 1140.19  119.39
  -3   0   1 1136.59  119.49
  -3   0   1 1249.57  119.29
  -3   0   1 1184.88  119.49
  -3   0   1 1167.08  119.39
  -3   0   1 1266.27  119.19
  -3   0   1 1328.77  119.69
   2   0  -1 1277.67  140.59
   2   0  -1 1515.55  140.29
   2   0  -1 1404.66  140.49
  -2   0   1 1530.45  140.59
  -2   0   1 1291.77  140.39
  -2   0   1 1466.35  140.49
  -2   0   1 1507.45  140.29
  -2   0   1 1273.17  140.59
  -2   0   1 1473.55  140.39
  -2   0   1 1506.15  140.59
   1   0  -1  228.78   22.30
   1   0  -1  226.08   22.60
   1   0  -1  224.78   22.20
   1   0  -1  253.47   22.40
   1   0  -1  201.18   22.40
  -1   0   1  213.58   22.40
  -1   0   1  226.88   22.30
  -1   0   1  224.58   22.30
  -1   0   1  212.68   22.30
  -1   0   1  230.38   22.40
  -1   0   1  236.98   22.20
   0   0  -1   -0.10    0.30
  -1   0  -1  763.82   80.89
  -1   0  -1  820.02   80.89
   1   0   1  834.02   80.89
   1   0   1  848.62   80.89
   1   0   1  753.32   80.99
   1   0   1  845.32   81.09
   1   0   1  879.81   80.89
  -2   0  -1   95.49    9.50
  -2   0  -1   76.89    9.40
  -2   0  -1   85.89   10.50
  -2   0  -1   81.89    9.70
   2   0   1  101.39    9.60
  -3   0  -1  158.68   19.40
  -3   0  -1  178.28   17.90
  -3   0  -1  152.18   17.90
  -3   0  -1  177.68   18.50
  -3   0  -1  183.48   19.20
  -4   0  -1    8.80    6.40
  -4   0  -1    2.90    3.90
  -4   0  -1    5.00    3.70
  -4   0  -1   -4.10    8.10
  -4   0  -1    4.30    4.70
  -4   0  -1    4.10    6.80
  -4   0  -1   -1.20    5.90
  -4   0  -1   -0.60    9.70
   4   0   1    5.90    4.00
   4   0   1    2.80    6.30
  -5   0  -1   -0.70    5.00
  -5   0  -1    3.90   13.80
  -5   0  -1    7.30   12.40
  -5   0  -1  -14.40    7.50
  -5   0  -1   -6.80    5.10
  -5   0  -1   -0.80    6.80
  -5   0  -1    6.10    7.40
  -5   0  -1    5.30    6.30
   5   0   1    2.90    8.20
  -6   0  -1 1227.58  131.79
  -6   0  -1 1184.68  132.59
  -6   0  -1 1395.26  133.29
  -6   0  -1 1469.75  132.09
   6   0   1 1364.66  131.39
  -7   0  -1  358.26   47.50
  -7   0  -1  383.06   46.80
  -7   0  -1  450.55   45.80
  -7   0  -1  466.15   45.70
  -7   0  -1  497.45   48.60
  -7   0  -1  480.65   46.20
   7   0   1  431.86   44.30
  -8   0  -1    2.20   15.40
  -8   0  -1  -10.20   10.10
  -8   0  -1   16.40   14.60
  -8   0  -1   -4.90   34.90
  -8   0  -1   12.80   11.50
  -8   0  -1  -18.00   12.70
  -8   0  -1   -3.50   14.50
   8   0   1    7.20    6.40
   8   0   1  -13.80   11.00
   8   0   1   -7.50    8.60
  -9   0  -1  215.78   33.40
  -9   0  -1  262.07   37.00
  -9   0  -1  246.08   31.70
  -9   0  -1  214.48   39.10
  -9   0  -1  222.48   31.40
  -9   0  -1  222.68   63.19
   9   0   1  253.17   25.60
 -10   0  -1  -26.50   16.70
 -10   0  -1  -13.00   16.60
 -10   0  -1   -9.60   19.20
 -10   0  -1 -100.59   54.19
 -10   0  -1   -8.40   22.80
 -10   0  -1    9.30   23.50
  10   0   1    2.60    6.80
  10   0   1   -4.60    9.60
  10   0   1   -0.90   11.80
  10   0   1   -5.20    8.40
  10   0   1    2.10    5.70
 -11   0  -1  -13.10   25.10
 -11   0  -1   55.39   32.00
 -11   0  -1   33.00   22.40
 -11   0  -1    0.70   28.30
  11   0   1   27.80    8.10
  11   0   1   21.80   11.00
  11   0   1    4.50   12.60
  11   0   1   31.50    8.50
  11   0   1   14.40    7.90
  11   0   1   13.40   10.00
  12  -1  -1    7.20   12.80
  12  -1  -1   37.00   11.20
  12  -1  -1   28.40   10.00
  12  -1  -1  -12.00   18.20
 -12   1   1   22.50   24.90
 -12   1   1    9.40   26.60
 -12   1   1   15.00   39.00
 -12   1   1   12.50   31.40
  11  -1  -1   28.90    8.70
  11  -1  -1    1.90   12.30
  11  -1  -1   -2.90   15.40
  11  -1  -1   -3.40   17.90
 -11   1   1   16.40   32.40
 -11   1   1   20.10   24.00
 -11   1   1   12.10   20.10
 -11   1   1   12.40   20.80
  10  -1  -1    4.90   13.50
  10  -1  -1   23.10    7.50
  10  -1  -1   -1.30   12.00
  10  -1  -1  -32.20   17.10
 -10   1   1   28.90   18.20
 -10   1   1   18.30   16.30
 -10   1   1    6.90   26.80
 -10   1   1   13.90   15.40
   9  -1  -1  393.46   38.80
   9  -1  -1  404.26   39.00
  -9   1   1  364.56   41.80
  -9   1   1  380.76   41.70
  -9   1   1  379.16   47.60
  -9   1   1  322.87   42.70
   8  -1  -1   -4.30   11.30
   8  -1  -1   25.40    9.10
   8  -1  -1    5.40   17.60
   8  -1  -1    8.10    5.40
  -8   1   1    2.50   29.90
  -8   1   1    6.30    8.90
  -8   1   1   29.30    9.90
  -8   1   1   31.10   10.50
  -8   1   1    8.70   18.00
  -8   1   1    8.10   10.80
   7  -1  -1  196.18   20.40
   7  -1  -1  156.88   22.70
  -7   1   1  180.78   25.80
  -7   1   1  205.48   20.00
  -7   1   1  188.28   21.90
  -7   1   1  175.88   19.30
  -7   1   1  153.28   21.70
  -7   1   1  155.08   19.50
   6  -1  -1  225.28   22.30
   6  -1  -1  150.28   27.70
  -6   1   1  237.18   22.00
  -6   1   1  190.28   22.70
  -6   1   1  228.48   23.30
  -6   1   1  164.48   27.60
  -6   1   1  207.08   23.50
  -6   1   1  220.08   22.80
   5  -1  -1   12.80    3.80
   5  -1  -1   23.70    9.10
   5  -1  -1   18.30    8.50
  -5   1   1    4.70    8.70
  -5   1   1    9.10    3.00
  -5   1   1   12.50    5.40
  -5   1   1   16.70   10.00
  -5   1   1   12.40    4.40
  -5   1   1   11.50    5.40
  -5   1   1   18.00    5.70
  -5   1   1   12.50    4.80
   4  -1  -1   24.20    4.00
   4  -1  -1   25.00    7.80
   4  -1  -1   32.20    6.70
   4  -1  -1   22.20    6.10
  -4   1   1   27.80    3.70
  -4   1   1   23.90    4.90
  -4   1   1   18.50    5.60
  -4   1   1   23.30    4.40
  -4   1   1   16.60    4.80
  -4   1   1   22.00    7.90
  -4   1   1   17.20    7.20
   3  -1  -1  966.30   89.89
   3  -1  -1  944.41   90.79
  -3   1   1  948.41   90.19
  -3   1   1  949.51   89.89
  -3   1   1 1011.50   90.19
  -3   1   1  759.62   90.59
  -3   1   1  789.32   90.89
   2  -1  -1  182.18   19.80
   2  -1  -1  216.48   19.20
   2  -1  -1  185.08   19.50
  -2   1   1  201.08   20.30
  -2   1   1  190.48   19.20
  -2   1   1  215.38   19.50
  -2   1   1  166.48   19.80
  -2   1   1  169.68   19.20
  -2   1   1  209.68   19.40
   1  -1  -1  607.14   63.29
   1  -1  -1  609.24   63.39
   1  -1  -1  644.64   63.19
   1  -1  -1  600.44   63.19
  -1   1   1  624.54   63.39
  -1   1   1  718.53   63.29
  -1   1   1  628.74   63.29
  -1   1   1  674.93   63.19
  -1   1   1  664.83   63.19
   0  -1  -1    9.00    1.30
   0  -1  -1    7.30    1.30
   0  -1  -1    7.70    1.30
   0  -1  -1    8.80    1.10
   0  -1  -1    7.80    1.10
   0  -1  -1    3.80    2.30
   0  -1  -1   11.90    1.70
   0   1   1    7.50    1.10
   0   1   1    8.10    1.20
   0   1   1   13.50    2.00
   0   1   1    8.00    1.40
   0   1   1   11.00    1.60
   0   1   1   12.30    2.30
  -1  -1  -1   48.90    7.10
  -1  -1  -1   51.69    6.60
  -1  -1  -1   67.89    6.60
  -1  -1  -1   55.49    6.30
  -1  -1  -1   73.59    6.60
   1   1   1   64.99    6.30
   1   1   1   69.69    7.00
   1   1   1   66.89    6.30
   1   1   1   56.89    6.50
   1   1   1   67.59    6.40
   1   1   1   60.89    6.30
  -2  -1  -1  130.69   14.70
  -2  -1  -1  142.29   14.50
  -2  -1  -1  158.78   14.60
  -2  -1  -1  113.09   14.60
   2   1   1  159.58   14.30
   2   1   1  149.79   14.60
  -3  -1  -1  230.98   22.70
  -3  -1  -1  215.58   23.00
  -3  -1  -1  204.38   23.30
  -3  -1  -1  230.78   25.20
   3   1   1  223.98   22.00
  -4  -1  -1   79.59   11.70
  -4  -1  -1   86.29   14.00
  -4  -1  -1  109.59   13.10
  -4  -1  -1   76.79   13.80
  -4  -1  -1   98.19   12.20
  -4  -1  -1   94.59   12.40
   4   1   1  107.69   11.10
  -5  -1  -1   30.50   13.70
  -5  -1  -1   29.00    7.40
  -5  -1  -1   36.00   14.90
  -5  -1  -1   51.29    8.70
  -5  -1  -1   25.60    8.80
  -5  -1  -1   26.00    7.70
  -5  -1  -1   50.09   10.60
   5   1   1   33.60    7.90
   5   1   1   10.10    8.10
  -6  -1  -1  962.20  109.39
  -6  -1  -1 1213.68  109.19
  -6  -1  -1 1046.10  109.29
  -6  -1  -1 1236.58  109.19
  -6  -1  -1 1052.59  109.19
   6   1   1 1020.10  108.59
  -7  -1  -1    4.60    8.50
  -7  -1  -1    0.80   11.60
  -7  -1  -1    5.50   12.50
  -7  -1  -1   -5.10   12.00
  -7  -1  -1  -20.20   24.50
  -7  -1  -1  -11.20   12.80
  -7  -1  -1   -8.10    9.50
   7   1   1    2.40    4.10
   7   1   1  -11.10    9.20
   7   1   1    6.00    2.90
   7   1   1   -1.00    4.30
   7   1   1   -9.80    7.30
  -8  -1  -1  -21.70   32.70
  -8  -1  -1    4.40   13.20
  -8  -1  -1   23.60   12.00
  -8  -1  -1   11.00   15.30
  -8  -1  -1   34.10   13.00
  -8  -1  -1    0.80   16.10
  -8  -1  -1   36.40   16.20
   8   1   1   15.10    5.70
   8   1   1   23.90    5.70
   8   1   1   16.20    8.80
   8   1   1   24.30    4.50
  -9  -1  -1   86.99   18.00
  -9  -1  -1   85.29   20.90
  -9  -1  -1   24.40   44.00
  -9  -1  -1   49.30   15.60
  -9  -1  -1   73.29   24.10
  -9  -1  -1   58.29   33.50
  -9  -1  -1   45.50   15.60
   9   1   1   40.10    8.40
   9   1   1   43.70    6.80
   9   1   1   15.30   11.70
   9   1   1   56.49    9.20
   9   1   1   42.10   10.70
 -10  -1  -1   40.60   18.50
 -10  -1  -1   41.30   23.90
 -10  -1  -1   70.89   18.80
 -10  -1  -1   72.49   22.60
 -10  -1  -1   93.29   33.00
 -10  -1  -1   35.50   23.30
  10   1   1   17.60   12.20
  10   1   1   45.60    7.50
  10   1   1   39.80    8.20
  10   1   1   57.49    7.90
  10   1   1   27.40    9.30
  10   1   1   52.49   11.30
 -11  -1  -1   28.30   26.80
 -11  -1  -1   40.70   23.50
 -11  -1  -1   38.10   28.40
 -11  -1  -1   87.49   33.00
  11   1   1   25.80    8.40
  11   1   1   36.10    8.00
  11   1   1    3.70   12.60
  11   1   1   21.40    9.60
  11   1   1   56.79   10.00
  11   1   1   20.30   11.50
  11   1   1   39.00    7.90
  12  -2  -1    1.30    9.70
  12  -2  -1  -21.00   13.10
 -12   2   1    6.10   25.00
 -12   2   1  -13.60   25.40
 -12   2   1   22.70   41.10
 -12   2   1   25.20   32.50
  11  -2  -1   10.00   11.70
  11  -2  -1    6.40   20.90
  11  -2  -1  -21.50   19.00
 -11   2   1   21.80   19.20
 -11   2   1   41.30   21.30
 -11   2   1   24.80   24.30
  10  -2  -1   15.10   13.30
  10  -2  -1   31.50    7.00
  10  -2  -1  -25.20   18.70
  10  -2  -1   23.40   16.00
 -10   2   1  -32.50   54.79
 -10   2   1   30.40   19.10
 -10   2   1   20.10   16.40
 -10   2   1   39.80   15.50
 -10   2   1   34.50   27.70
   9  -2  -1   -3.90   13.30
   9  -2  -1   35.70    8.70
   9  -2  -1   23.90    6.50
   9  -2  -1  -15.60   23.70
   9  -2  -1   22.90   12.70
  -9   2   1   23.30   12.20
  -9   2   1   14.40   10.40
  -9   2   1    5.80   13.80
  -9   2   1   59.79   24.10
  -9   2   1  -59.69   39.30
  -9   2   1   11.60   13.90
   8  -2  -1  -12.00   13.10
   8  -2  -1   15.90    9.60
   8  -2  -1   -2.40   18.10
   8  -2  -1   25.90    7.00
  -8   2   1    1.20   20.00
  -8   2   1   23.60    7.60
  -8   2   1   28.70   10.00
  -8   2   1   20.30    9.00
  -8   2   1  -26.80   29.30
  -8   2   1   14.70   10.10
  -8   2   1   11.80    6.50
  -8   2   1   27.20    7.90
   7  -2  -1  251.07   23.10
   7  -2  -1  154.88   32.30
  -7   2   1  228.78   24.20
  -7   2   1  173.08   33.20
  -7   2   1  242.68   23.40
  -7   2   1  223.18   25.70
  -7   2   1  188.18   25.50
  -7   2   1  231.38   23.80
  -7   2   1  197.28   25.30
   6  -2  -1 1287.67  115.89
   6  -2  -1 1325.97  116.39
   6  -2  -1 1001.50  118.69
  -6   2   1 1193.58  115.99
  -6   2   1 1320.27  116.09
  -6   2   1 1060.99  119.39
  -6   2   1 1087.69  117.09
  -6   2   1 1109.29  116.79
  -6   2   1 1012.90  116.89
  -6   2   1 1285.47  116.39
   5  -2  -1  760.22   70.59
   5  -2  -1  655.53   72.39
   5  -2  -1  817.12   70.89
  -5   2   1  592.24   74.99
  -5   2   1  657.63   71.69
  -5   2   1  657.23   72.39
  -5   2   1  763.72   70.69
  -5   2   1  692.03   70.59
  -5   2   1  778.52   71.29
   4  -2  -1   21.80    5.60
   4  -2  -1   11.00    7.90
   4  -2  -1   17.90    3.50
   4  -2  -1   15.30    4.50
  -4   2   1   26.40    3.70
  -4   2   1   22.00    4.00
  -4   2   1   22.90    7.80
  -4   2   1   16.40    3.90
  -4   2   1    6.60    9.20
  -4   2   1   18.40    8.20
   3  -2  -1 2643.24  277.87
   3  -2  -1 2960.10  277.47
  -3   2   1 2997.00  277.47
  -3   2   1 2549.15  278.17
  -3   2   1 2892.91  277.77
  -3   2   1 2857.61  277.57
   2  -2  -1  197.38   18.00
   2  -2  -1  149.79   18.90
   2  -2  -1  179.78   18.40
  -2   2   1  201.08   18.40
  -2   2   1  153.88   18.70
  -2   2   1  182.68   17.90
  -2   2   1  188.88   18.20
   1  -2  -1  118.89   11.20
   1  -2  -1  101.39   11.50
   1  -2  -1   92.99   13.40
   1  -2  -1  117.49   11.10
  -1   2   1  115.59   11.30
  -1   2   1  102.29   11.40
  -1   2   1  103.09   12.70
  -1   2   1   87.89   13.00
  -1   2   1  128.09   11.30
  -1   2   1  111.79   11.10
  -1   2   1  107.29   11.00
   0  -2  -1   43.10    4.80
   0  -2  -1   36.20    4.40
   0  -2  -1   47.10    4.40
   0   2   1   40.80    5.40
   0   2   1   44.00    4.50
   0   2   1   40.10    4.60
   0   2   1   40.30    4.80
   0   2   1   48.80    7.10
  -1  -2  -1   21.60    3.20
  -1  -2  -1   20.50    6.10
  -1  -2  -1   19.40    2.60
  -1  -2  -1   26.70    3.30
  -1  -2  -1   23.80    2.80
   1   2   1   20.20    2.40
   1   2   1   23.70    2.60
   1   2   1   29.40    2.90
   1   2   1   17.10    2.90
   1   2   1   25.30    5.10
  -2  -2  -1   79.09   10.30
   2   2   1   77.29   10.70
   2   2   1  103.39    9.10
  -3  -2  -1 4184.98  434.26
  -3  -2  -1 4336.97  434.46
  -3  -2  -1 4687.23  434.56
   3   2   1 4035.10  434.16
   3   2   1 4800.02  434.16
   3   2   1 4416.66  434.16
  -4  -2  -1   16.20    4.50
  -4  -2  -1   32.80    7.60
  -4  -2  -1   20.80    5.90
  -4  -2  -1    9.10   10.30
  -4  -2  -1   30.00    8.80
  -4  -2  -1   16.10    7.10
  -4  -2  -1   34.30    5.40
  -4  -2  -1   26.90    6.50
   4   2   1   29.70    4.30
   4   2   1   38.40    5.50
   4   2   1   34.90    6.00
   4   2   1   24.70    4.10
   4   2   1   22.30    4.10
  -5  -2  -1  252.37   29.30
  -5  -2  -1  221.78   30.10
  -5  -2  -1  229.88   32.70
  -5  -2  -1  236.18   30.10
  -5  -2  -1  306.27   29.40
   5   2   1  302.87   27.70
   5   2   1  310.17   28.90
   5   2   1  277.27   27.50
  -6  -2  -1  198.98   24.30
  -6  -2  -1  212.68   23.20
  -6  -2  -1  205.88   31.90
  -6  -2  -1  171.88   25.40
  -6  -2  -1  207.88   25.20
  -6  -2  -1  169.98   24.20
   6   2   1  185.18   20.20
   6   2   1  198.78   22.00
   6   2   1  198.68   20.40
  -7  -2  -1  135.89   19.20
  -7  -2  -1  121.49   19.20
  -7  -2  -1  111.19   19.40
  -7  -2  -1  107.59   20.90
  -7  -2  -1  104.79   18.10
   7   2   1  136.29   14.20
   7   2   1  127.59   13.50
  -8  -2  -1  153.28   27.30
  -8  -2  -1  170.68   28.00
  -8  -2  -1  130.09   27.30
  -8  -2  -1  209.08   40.40
  -8  -2  -1  215.88   28.80
  -8  -2  -1  222.48   29.70
  -8  -2  -1  207.78   26.50
   8   2   1  182.58   23.10
   8   2   1  188.58   19.90
   8   2   1  208.08   20.80
   8   2   1  208.28   20.20
   8   2   1  199.48   20.60
  -9  -2  -1   -9.60   23.60
  -9  -2  -1   -3.70   17.40
  -9  -2  -1   -7.70   20.10
  -9  -2  -1   13.80   16.40
  -9  -2  -1    6.80   18.90
  -9  -2  -1   35.60   15.40
   9   2   1    7.00    4.20
   9   2   1   -2.00    8.80
   9   2   1  -18.80    9.70
   9   2   1    6.00    5.90
   9   2   1   -4.80    5.60
   9   2   1    1.20    4.30
 -10  -2  -1   24.90   33.40
 -10  -2  -1   50.69   20.20
 -10  -2  -1   60.69   23.80
 -10  -2  -1  -26.50   24.00
 -10  -2  -1   24.70   22.00
  10   2   1   22.50    7.60
  10   2   1   30.30    6.30
  10   2   1   17.00   11.30
  10   2   1   36.70    7.20
  10   2   1   14.20   10.00
 -11  -2  -1    7.10   29.70
 -11  -2  -1  -19.90   24.00
 -11  -2  -1   10.50   32.20
  11   2   1    3.50   10.70
  11   2   1   -6.90    7.10
  11   2   1   -1.10    7.60
  11   2   1   -1.20    6.80
  11   2   1   -4.10   12.40
  11   2   1    2.00    8.20
  12  -3  -1    6.70   10.30
  12  -3  -1   -4.10   14.50
 -12   3   1  -32.00   40.80
 -12   3   1   -8.80   22.90
 -12   3   1   20.40   25.10
  11  -3  -1   13.20    8.90
  11  -3  -1  -16.30   23.40
  11  -3  -1  -22.90   18.80
 -11   3   1   24.60   24.90
 -11   3   1   32.70   17.50
 -11   3   1   23.80   36.90
  10  -3  -1  -14.50   16.10
  10  -3  -1    6.70   13.60
  10  -3  -1  -39.70   21.30
  10  -3  -1   -1.10    6.00
 -10   3   1  -15.30   16.00
 -10   3   1   -2.30   12.80
 -10   3   1    7.60   30.10
 -10   3   1    3.50   18.90
 -10   3   1  -81.99   52.09
   9  -3  -1   67.59   16.10
   9  -3  -1   73.79   12.60
  -9   3   1   68.89   16.70
  -9   3   1   49.70   27.50
  -9   3   1   75.99   16.70
  -9   3   1   99.99   13.20
   8  -3  -1   22.50   10.20
   8  -3  -1   -7.30   14.60
   8  -3  -1  -26.80   20.30
   8  -3  -1   10.10    7.00
  -8   3   1    7.90    6.60
  -8   3   1    6.00   10.20
  -8   3   1   26.60   10.80
  -8   3   1  -38.60   27.20
  -8   3   1   21.90    9.80
  -8   3   1    0.10   25.00
   7  -3  -1  121.59   12.30
   7  -3  -1   55.89   20.40
   7  -3  -1  104.89   14.70
  -7   3   1   47.00   24.40
  -7   3   1   94.59   15.90
  -7   3   1   74.59   15.70
  -7   3   1   98.49   23.90
  -7   3   1   85.39   11.80
  -7   3   1  112.49   19.20
  -7   3   1  109.29   13.60
   6  -3  -1  895.21   80.79
   6  -3  -1  697.63   84.09
  -6   3   1  890.41   80.99
  -6   3   1  858.41   81.19
  -6   3   1  792.32   81.79
  -6   3   1  824.32   82.79
  -6   3   1  693.83   86.19
   5  -3  -1   45.90   10.50
   5  -3  -1   64.69    7.70
   5  -3  -1   44.60    6.40
   5  -3  -1   38.80   12.80
   5  -3  -1   43.30    7.60
  -5   3   1   52.69    6.70
  -5   3   1   27.00   16.30
  -5   3   1   38.50    9.70
  -5   3   1   38.60   12.00
  -5   3   1   42.90    6.20
  -5   3   1   54.19    7.70
   4  -3  -1  801.22   87.99
   4  -3  -1  889.01   87.29
   4  -3  -1  843.02   88.19
  -4   3   1 1005.90   87.49
  -4   3   1  925.01   88.59
  -4   3   1  824.92   87.39
   3  -3  -1  327.27   30.50
   3  -3  -1  290.87   31.00
  -3   3   1  313.07   30.20
  -3   3   1  295.27   32.20
  -3   3   1  295.17   30.30
  -3   3   1  300.07   30.90
   2  -3  -1   45.30    6.20
   2  -3  -1   43.40    5.00
   2  -3  -1   31.50    6.70
  -2   3   1   52.59    6.30
  -2   3   1   32.90    6.80
  -2   3   1   18.00    9.30
  -2   3   1   38.10    5.10
  -2   3   1   48.90    4.80
  -2   3   1   59.69    9.60
  -2   3   1   46.60    5.90
   1  -3  -1 2782.02  296.57
   1  -3  -1 2891.11  296.47
   1  -3  -1 3080.79  296.37
  -1   3   1 2856.41  296.27
  -1   3   1 2818.22  296.47
  -1   3   1 3079.09  296.37
  -1   3   1 3085.29  296.47
  -1   3   1 3277.17  297.17
  -1   3   1 3223.08  296.57
   0  -3  -1   19.00    2.80
   0  -3  -1   21.80    3.00
   0  -3  -1   20.10    4.30
   0  -3  -1   23.30    9.80
   0  -3  -1   17.70    3.10
   0   3   1   25.50    3.00
   0   3   1   21.10    4.20
   0   3   1   31.00    7.10
   0   3   1   20.50    3.10
   0   3   1   19.00    3.20
  -1  -3  -1 1150.28   97.89
  -1  -3  -1  937.21   97.29
  -1  -3  -1 1091.39   97.49
   1   3   1  912.71   97.29
   1   3   1  895.11   97.39
   1   3   1  842.32   97.89
   1   3   1 1080.19   97.29
  -2  -3  -1   89.29    8.60
  -2  -3  -1   62.29    7.80
  -2  -3  -1   68.09    9.20
   2   3   1   81.49    7.80
   2   3   1   81.19    8.20
   2   3   1   73.09    7.90
   2   3   1   75.49    8.30
  -3  -3  -1   -5.20    8.30
  -3  -3  -1    9.10    3.60
  -3  -3  -1   -4.40   11.60
  -3  -3  -1    1.70    6.10
  -3  -3  -1    3.20    3.60
  -3  -3  -1    0.00    5.50
  -3  -3  -1   -9.10    6.50
   3   3   1    7.50    2.10
   3   3   1    4.30    2.10
   3   3   1    7.90    4.60
   3   3   1    3.50    2.40
   3   3   1    4.80    1.70
  -4  -3  -1 1287.87  127.29
  -4  -3  -1 1334.87  127.59
  -4  -3  -1 1357.86  127.29
  -4  -3  -1 1063.79  127.09
   4   3   1 1406.66  126.79
   4   3   1 1343.57  126.79
   4   3   1 1368.86  126.59
   4   3   1 1265.67  126.49
   4   3   1 1169.48  126.49
   4   3   1 1225.18  126.59
  -5  -3  -1 1235.48  115.59
  -5  -3  -1 1084.79  115.49
  -5  -3  -1 1054.59  115.69
   5   3   1 1046.10  114.19
   5   3   1 1250.67  114.49
   5   3   1 1264.67  114.09
   5   3   1 1166.88  114.19
   5   3   1 1128.59  113.99
  -6  -3  -1  103.79   19.00
  -6  -3  -1  119.39   19.60
  -6  -3  -1  105.99   16.50
  -6  -3  -1   89.59   16.40
  -6  -3  -1  126.49   17.30
  -6  -3  -1   55.99   27.40
  -6  -3  -1  102.69   16.40
   6   3   1  105.39   13.60
   6   3   1  102.59   11.50
   6   3   1  101.09   11.10
   6   3   1  110.09   11.80
  -7  -3  -1  477.55   54.89
  -7  -3  -1  509.25   54.79
  -7  -3  -1  422.26   49.70
  -7  -3  -1  444.36   48.90
  -7  -3  -1  433.36   50.59
  -7  -3  -1  433.46   50.39
   7   3   1  400.46   45.10
   7   3   1  458.85   45.60
   7   3   1  502.55   46.60
   7   3   1  475.15   45.40
  -8  -3  -1  313.07   45.10
  -8  -3  -1  281.47   51.59
  -8  -3  -1  354.36   41.40
  -8  -3  -1  369.76   44.10
   8   3   1  380.86   36.60
   8   3   1  323.17   37.60
   8   3   1  382.36   36.10
   8   3   1  364.96   36.50
  -9  -3  -1  101.89   26.80
  -9  -3  -1  140.89   22.60
  -9  -3  -1   36.50   23.80
  -9  -3  -1   67.39   22.30
  -9  -3  -1   87.89   19.90
   9   3   1   73.19   11.10
   9   3   1   57.89   10.90
   9   3   1   64.29   12.30
   9   3   1   98.49   10.00
   9   3   1   90.19   10.40
 -10  -3  -1  115.89   29.70
 -10  -3  -1  142.09   28.00
 -10  -3  -1   99.19   36.30
 -10  -3  -1   81.09   22.70
  10   3   1   71.39   13.40
  10   3   1  101.19   12.30
  10   3   1   77.49   13.00
  10   3   1  111.29   12.10
  10   3   1   73.59   13.80
 -11  -3  -1   29.90   31.50
 -11  -3  -1   42.40   26.00
 -11  -3  -1   13.30   27.90
 -11  -3  -1   30.80   34.30
  11   3   1   10.40   10.80
  11   3   1   14.40    7.80
  11   3   1   17.20    7.70
  11   3   1   14.30    7.90
  11   3   1    6.90    7.30
  11  -4  -1  -18.80   21.60
  11  -4  -1   40.90    9.70
 -11   4   1   20.40   16.80
 -11   4   1   13.10   20.60
 -11   4   1  -17.10   39.00
 -11   4   1   20.70   28.00
  10  -4  -1   13.20   22.20
  10  -4  -1    8.70   16.00
 -10   4   1   23.60   19.40
 -10   4   1   33.80   17.90
 -10   4   1   11.60   34.70
 -10   4   1  -58.49   53.09
 -10   4   1   49.30   12.30
   9  -4  -1   81.59   18.90
  -9   4   1  138.39   25.00
  -9   4   1  108.19   34.20
  -9   4   1   77.59   18.50
  -9   4   1  143.79   22.50
  -9   4   1  110.19   15.90
   8  -4  -1   32.40   10.90
   8  -4  -1   10.60    7.60
   8  -4  -1  -17.50   20.90
   8  -4  -1   -5.60   14.10
  -8   4   1    7.80    9.30
  -8   4   1    0.90   26.30
  -8   4   1    6.10   13.60
  -8   4   1  -20.40   25.20
  -8   4   1   10.60    5.90
   7  -4  -1  166.98   33.20
   7  -4  -1  213.68   23.50
   7  -4  -1  194.88   22.20
  -7   4   1  229.08   22.90
  -7   4   1  201.68   29.00
  -7   4   1  213.48   21.80
  -7   4   1  192.58   24.50
   6  -4  -1   64.49   10.80
   6  -4  -1   39.50   17.00
   6  -4  -1   70.09   15.20
   6  -4  -1   87.49    9.80
   6  -4  -1   77.89   12.90
  -6   4   1   74.49    9.60
  -6   4   1   80.39   11.80
  -6   4   1   49.40   18.90
  -6   4   1   74.59   23.70
  -6   4   1   82.19   10.00
   5  -4  -1  127.79   16.60
   5  -4  -1  125.29   15.90
   5  -4  -1  111.49   13.60
   5  -4  -1   69.59   27.30
   5  -4  -1  140.39   13.20
  -5   4   1  118.89   12.90
  -5   4   1  110.29   13.80
   4  -4  -1 1010.20  100.19
   4  -4  -1  948.91  101.39
   4  -4  -1 1061.39   99.99
   4  -4  -1  955.10  100.99
  -4   4   1  952.00   99.99
  -4   4   1 1140.19   99.99
  -4   4   1 1010.50  100.39
   3  -4  -1  221.78   20.20
   3  -4  -1  206.38   20.20
   3  -4  -1  170.58   23.00
   3  -4  -1  201.28   20.80
  -3   4   1  162.68   21.80
  -3   4   1  208.38   19.90
  -3   4   1  200.78   20.40
  -3   4   1  188.78   19.70
   2  -4  -1   89.69   13.20
   2  -4  -1  116.09   11.80
   2  -4  -1  116.59   11.50
   2  -4  -1  114.69   11.20
  -2   4   1  100.49   16.30
  -2   4   1  104.09   11.10
  -2   4   1  109.89   11.00
  -2   4   1  106.39   11.80
  -2   4   1  108.39   12.20
  -2   4   1   93.39   12.50
   1  -4  -1  116.89   12.90
   1  -4  -1  111.49   13.60
   1  -4  -1  127.39   13.30
   1  -4  -1  116.09   12.80
  -1   4   1  132.79   13.30
  -1   4   1  123.79   13.40
  -1   4   1  128.19   12.80
  -1   4   1  129.09   15.80
  -1   4   1  138.99   13.20
  -1   4   1  121.89   13.00
   0  -4  -1   64.59    7.10
   0  -4  -1   59.19    7.10
   0  -4  -1   56.19    8.70
   0  -4  -1   65.99    6.90
   0   4   1   64.29    7.00
   0   4   1   76.89    7.60
   0   4   1   45.00    9.20
   0   4   1   67.59    7.60
   0   4   1   64.59    7.10
  -1  -4  -1  288.97   26.10
  -1  -4  -1  246.48   24.80
   1   4   1  271.57   24.80
   1   4   1  230.98   25.10
   1   4   1  233.48   25.00
   1   4   1  232.48   25.10
  -2  -4  -1  685.33   68.79
  -2  -4  -1  765.32   69.39
  -2  -4  -1  624.44   68.69
   2   4   1  712.43   68.49
   2   4   1  705.33   68.69
   2   4   1  681.83   68.39
   2   4   1  684.23   68.59
  -3  -4  -1  476.35   44.60
   3   4   1  405.16   43.40
   3   4   1  475.05   44.40
   3   4   1  449.76   43.20
   3   4   1  370.26   43.40
   3   4   1  455.35   43.40
   3   4   1  430.86   43.10
  -4  -4  -1  304.87   29.50
  -4  -4  -1  236.18   28.30
  -4  -4  -1  255.67   36.10
   4   4   1  262.17   27.10
   4   4   1  281.67   27.00
   4   4   1  238.38   26.90
   4   4   1  289.57   27.10
   4   4   1  278.07   27.80
  -5  -4  -1  315.97   31.60
  -5  -4  -1  238.28   33.80
  -5  -4  -1  294.77   32.80
   5   4   1  283.67   28.80
   5   4   1  254.07   28.80
   5   4   1  307.47   29.20
   5   4   1  289.57   29.10
   5   4   1  285.77   28.70
  -6  -4  -1  131.99   21.90
  -6  -4  -1  103.49   20.40
  -6  -4  -1  168.38   22.70
   6   4   1  155.78   16.10
   6   4   1  166.18   17.10
   6   4   1  147.39   16.00
   6   4   1  140.89   16.20
   6   4   1  161.48   16.30
   6   4   1  147.59   15.60
  -7  -4  -1   39.50   16.80
  -7  -4  -1   32.20   17.50
  -7  -4  -1   70.99   16.60
  -7  -4  -1   37.00   16.40
   7   4   1   32.10    5.90
   7   4   1   44.10    7.30
   7   4   1   43.80    8.10
   7   4   1   39.30    5.90
  -8  -4  -1   -8.80   17.90
  -8  -4  -1    7.40   19.90
  -8  -4  -1  -17.00   19.50
  -8  -4  -1    5.00   17.90
   8   4   1   -6.30    8.50
   8   4   1    4.30    3.50
   8   4   1    8.30    5.20
   8   4   1    0.10    7.50
   8   4   1   -2.60    4.70
  -9  -4  -1    1.90   24.10
  -9  -4  -1   28.00   21.30
  -9  -4  -1    3.70   22.00
  -9  -4  -1   19.70   27.00
   9   4   1    6.30    4.00
   9   4   1   10.10    8.50
   9   4   1    6.40    4.90
   9   4   1   -3.60    6.90
   9   4   1   -0.50    9.50
 -10  -4  -1  -62.79   37.00
 -10  -4  -1   30.90   27.20
 -10  -4  -1   25.00   28.40
 -10  -4  -1    9.80   25.30
  10   4   1   -2.00    6.60
  10   4   1   -6.20    5.20
  10   4   1    0.30    5.40
  10   4   1   -5.00    5.30
  10   4   1   -5.90    9.60
  10   4   1   -5.20    6.10
 -11  -4  -1  171.08   36.60
 -11  -4  -1  185.68   39.40
 -11  -4  -1  138.39   34.50
  11   4   1   97.09   14.00
  11   4   1   61.79   11.10
  11   4   1   81.69   13.20
  11  -5  -1  -12.00   23.30
  11  -5  -1  -38.50   39.40
  11  -5  -1  -21.10   14.60
  11  -5  -1    0.30    8.40
 -11   5   1   -8.40   38.90
 -11   5   1   12.60   15.40
 -11   5   1    4.00   21.60
 -11   5   1  -48.20   62.19
  10  -5  -1   -5.80   15.40
  10  -5  -1  -45.60   27.50
  10  -5  -1  -18.10   19.50
 -10   5   1   20.70   34.00
 -10   5   1  -45.90   46.60
 -10   5   1    4.90   10.70
 -10   5   1   15.10   20.10
 -10   5   1   -4.80   17.30
   9  -5  -1  -12.70   17.90
   9  -5  -1   10.90   15.10
   9  -5  -1  -28.70   26.20
  -9   5   1   28.00    7.80
  -9   5   1   14.60   14.30
  -9   5   1    9.80   16.50
  -9   5   1  -48.70   33.20
  -9   5   1  -12.00   28.90
   8  -5  -1  254.47   29.60
   8  -5  -1  241.88   31.10
   8  -5  -1  192.08   40.30
  -8   5   1  264.77   37.70
  -8   5   1  307.37   28.50
  -8   5   1  317.27   31.00
  -8   5   1  242.28   31.70
   7  -5  -1  299.47   33.30
   7  -5  -1  226.18   37.60
   7  -5  -1  303.77   31.20
   7  -5  -1  297.87   32.20
  -7   5   1  301.27   30.50
  -7   5   1  322.97   31.20
  -7   5   1  300.57   32.70
   6  -5  -1   55.39   20.60
   6  -5  -1  103.69   11.80
   6  -5  -1  100.29   12.40
   6  -5  -1   76.49   15.40
   6  -5  -1   92.19   15.20
  -6   5   1   93.99   13.10
  -6   5   1   79.09   10.60
  -6   5   1   77.59   26.30
  -6   5   1   94.39   11.00
   5  -5  -1 1029.20  114.89
   5  -5  -1 1191.58  113.89
   5  -5  -1 1113.29  115.19
  -5   5   1 1245.28  113.39
  -5   5   1 1080.59  113.89
  -5   5   1 1216.58  113.49
   4  -5  -1 1539.55  140.89
   4  -5  -1 1354.06  141.49
   4  -5  -1 1288.97  144.59
   4  -5  -1 1354.46  142.59
  -4   5   1 1401.76  140.49
  -4   5   1 1520.45  141.09
  -4   5   1 1502.75  140.39
  -4   5   1 1410.76  142.79
   3  -5  -1    5.30    3.50
   3  -5  -1    4.20    4.40
   3  -5  -1   -3.20    8.10
   3  -5  -1    0.00   11.60
  -3   5   1   -7.90   11.60
  -3   5   1    1.60    6.10
  -3   5   1    2.00    2.20
  -3   5   1   10.40   10.10
  -3   5   1   -0.60    4.20
   2  -5  -1  698.03   62.79
   2  -5  -1  583.54   63.79
   2  -5  -1  595.44   62.89
   2  -5  -1  666.43   62.79
  -2   5   1  609.94   63.19
  -2   5   1  612.04   63.09
  -2   5   1  655.23   62.99
   1  -5  -1   15.00    3.20
   1  -5  -1   11.20    4.70
   1  -5  -1    9.80    2.90
   1  -5  -1   -8.10   18.50
   1  -5  -1    7.70    4.30
  -1   5   1   14.10    3.90
  -1   5   1   14.50    3.70
  -1   5   1   23.60    7.90
  -1   5   1   27.10   11.20
  -1   5   1   14.60    3.60
  -1   5   1   10.10    2.70
  -1   5   1   13.00    3.80
   0  -5  -1  787.82   79.39
   0  -5  -1  831.42   79.19
   0  -5  -1  722.53   79.59
   0  -5  -1  834.72   79.19
   0   5   1  850.51   79.49
   0   5   1  806.42   79.29
   0   5   1  842.12   79.59
   0   5   1  865.81   79.19
   0   5   1  659.73   79.89
  -1  -5  -1  546.05   53.59
  -1  -5  -1  552.24   53.99
  -1  -5  -1  593.94   54.59
   1   5   1  551.64   53.89
   1   5   1  525.35   53.59
   1   5   1  513.25   53.89
   1   5   1  516.55   53.89
  -2  -5  -1  297.27   30.30
  -2  -5  -1  287.77   28.80
  -2  -5  -1  280.97   29.00
   2   5   1  287.47   28.60
   2   5   1  289.37   28.80
   2   5   1  279.57   28.80
   2   5   1  284.27   28.70
  -3  -5  -1   74.29    8.90
  -3  -5  -1   21.30   16.80
  -3  -5  -1   66.49   10.50
   3   5   1   63.49    7.60
   3   5   1   60.89    6.90
   3   5   1   65.79    7.80
   3   5   1   74.69   11.20
   3   5   1   58.99    7.10
  -4  -5  -1 1921.61  173.88
   4   5   1 1553.54  173.28
   4   5   1 1893.51  173.68
   4   5   1 1624.44  172.88
   4   5   1 1986.60  172.98
   4   5   1 1555.64  172.98
  -5  -5  -1  196.08   25.40
  -5  -5  -1  306.87   37.60
  -5  -5  -1  235.78   25.60
   5   5   1  217.28   22.50
   5   5   1  210.38   21.60
   5   5   1  198.18   21.30
   5   5   1  224.08   21.40
   5   5   1  176.98   21.40
  -6  -5  -1   38.20   13.20
  -6  -5  -1   21.80   15.80
  -6  -5  -1   15.50   11.10
  -6  -5  -1   58.59   15.00
  -6  -5  -1   26.20   18.50
   6   5   1    4.90    6.50
   6   5   1   18.50    4.60
   6   5   1   25.00    4.90
   6   5   1    8.80    5.90
   6   5   1   18.30    5.10
   6   5   1   23.90    3.70
   6   5   1   22.00    4.50
  -7  -5  -1   43.10   16.60
  -7  -5  -1   68.49   19.00
  -7  -5  -1   56.59   19.80
   7   5   1   48.80    6.50
   7   5   1   44.70    6.60
   7   5   1   28.20    9.00
   7   5   1   46.60    6.90
   7   5   1   40.70    7.70
  -8  -5  -1   32.60   20.40
  -8  -5  -1   16.20   19.50
  -8  -5  -1   29.50   23.60
  -8  -5  -1   -4.30   23.50
   8   5   1   22.40    4.50
   8   5   1   19.20    6.10
   8   5   1   19.60    8.80
   8   5   1   23.80    5.40
   8   5   1   29.10    8.00
  -9  -5  -1   67.89   27.50
  -9  -5  -1   21.40   31.40
  -9  -5  -1   38.70   24.10
  -9  -5  -1   49.10   24.60
   9   5   1   19.40    4.80
   9   5   1   12.70    4.70
   9   5   1   19.30    8.90
   9   5   1   16.70    6.70
   9   5   1   18.80    5.50
 -10  -5  -1   29.90   48.40
 -10  -5  -1    8.70   29.10
 -10  -5  -1  -43.40   43.20
  10   5   1   -6.90   11.00
  10   5   1   -3.60    6.70
  10   5   1    5.50    5.60
  10   5   1    9.10    5.80
 -11  -5  -1   27.60   38.50
 -11  -5  -1   68.19   35.20
 -11  -5  -1   88.79   36.30
  11   5   1   11.00    6.60
  11   5   1    7.90    8.20
  11   5   1    6.30    6.90
  11  -6  -1  -13.60   18.20
  11  -6  -1  -14.70   25.40
 -11   6   1   -0.50   13.50
 -11   6   1   15.50   22.30
 -11   6   1  -31.20   48.50
 -11   6   1 -100.39   71.79
  10  -6  -1    5.70   20.40
  10  -6  -1  -33.60   17.10
  10  -6  -1  -41.30   31.90
 -10   6   1   18.60   42.20
 -10   6   1  -10.30    9.90
 -10   6   1 -100.59   51.39
 -10   6   1  -28.30   17.60
   9  -6  -1  -23.40   20.50
   9  -6  -1   19.60   15.60
   9  -6  -1  -58.89   29.20
  -9   6   1   30.60    7.60
  -9   6   1   79.89   35.30
  -9   6   1   15.90   13.70
  -9   6   1  -47.00   33.70
   8  -6  -1  120.99   20.50
   8  -6  -1  123.29   21.30
   8  -6  -1   81.39   28.30
  -8   6   1  105.09   31.10
  -8   6   1  149.99   15.80
  -8   6   1  119.59   39.40
  -8   6   1  145.39   21.30
  -8   6   1  221.88   39.10
   7  -6  -1  159.98   18.70
   7  -6  -1   82.39   26.20
   7  -6  -1  156.18   21.70
   7  -6  -1  128.09   17.80
   7  -6  -1  199.08   30.10
  -7   6   1   99.49   35.80
  -7   6   1  145.09   26.90
  -7   6   1  122.79   18.60
  -7   6   1  129.19   15.40
   6  -6  -1  338.07   37.90
   6  -6  -1  336.77   33.30
   6  -6  -1  309.87   36.10
   6  -6  -1  329.17   33.90
  -6   6   1  332.77   40.90
  -6   6   1  302.47   32.40
  -6   6   1  303.77   33.90
  -6   6   1  326.97   32.50
   5  -6  -1   70.39   20.60
   5  -6  -1  132.29   20.30
   5  -6  -1  108.59   12.80
   5  -6  -1  129.29   13.40
   5  -6  -1  115.99   17.20
  -5   6   1   89.59   13.20
  -5   6   1  110.49   11.60
  -5   6   1   67.49   25.50
  -5   6   1   92.89   17.40
   4  -6  -1   62.59   16.20
   4  -6  -1   59.19   15.70
   4  -6  -1   82.59   12.50
   4  -6  -1   61.89   10.60
   4  -6  -1   76.59   10.20
  -4   6   1  107.49   15.00
  -4   6   1   79.19   10.40
  -4   6   1   87.09    9.80
   3  -6  -1  411.06   44.10
   3  -6  -1  426.26   43.70
   3  -6  -1  459.05   44.00
   3  -6  -1  407.46   46.40
  -3   6   1  397.16   43.20
  -3   6   1  489.25   43.10
  -3   6   1  399.56   43.90
  -3   6   1  474.05   44.50
   2  -6  -1 1894.51  184.68
   2  -6  -1 2008.00  184.78
   2  -6  -1 1943.11  184.58
   2  -6  -1 1672.53  185.28
  -2   6   1 1801.72  184.38
  -2   6   1 1956.50  184.88
  -2   6   1 1730.63  184.78
  -2   6   1 1947.61  184.48
   1  -6  -1  226.98   22.90
   1  -6  -1  211.68   22.00
   1  -6  -1  202.28   22.80
   1  -6  -1  191.48   22.20
  -1   6   1  209.38   22.60
  -1   6   1  232.68   23.10
  -1   6   1  195.88   22.10
  -1   6   1  245.98   22.30
  -1   6   1  231.08   22.80
   0  -6  -1  422.56   42.50
   0  -6  -1  368.56   41.80
   0  -6  -1  444.36   42.00
   0  -6  -1  490.35   41.80
   0   6   1  370.76   42.20
   0   6   1  362.96   43.20
   0   6   1  414.26   41.90
   0   6   1  441.16   42.30
   0   6   1  443.46   42.10
  -1  -6  -1  378.96   41.00
  -1  -6  -1  418.66   42.10
   1   6   1  460.15   41.00
   1   6   1  436.96   40.70
   1   6   1  342.37   41.10
   1   6   1  413.36   40.90
   1   6   1  407.06   41.10
  -2  -6  -1  205.68   20.90
  -2  -6  -1  193.48   21.60
  -2  -6  -1  182.38   23.20
   2   6   1  223.88   20.70
   2   6   1  218.18   21.10
   2   6   1  202.78   21.00
   2   6   1  195.68   21.00
  -3  -6  -1  222.78   23.50
  -3  -6  -1  228.38   24.90
  -3  -6  -1  156.68   32.50
   3   6   1  195.78   22.50
   3   6   1  244.48   22.30
   3   6   1  215.68   22.50
   3   6   1  257.77   25.60
  -4  -6  -1  143.39   18.10
  -4  -6  -1   80.09   16.80
   4   6   1  132.39   12.40
   4   6   1  108.69   12.80
   4   6   1  126.69   13.70
   4   6   1  117.69   15.70
  -5  -6  -1    8.20   20.20
  -5  -6  -1    6.80   16.60
  -5  -6  -1   32.00   10.10
  -5  -6  -1   26.60   11.30
  -5  -6  -1    4.20   14.00
   5   6   1   20.30    3.90
   5   6   1   25.30    6.80
   5   6   1   25.50    4.50
   5   6   1   25.10    4.70
   5   6   1   25.00    4.50
   5   6   1   34.50    4.60
   5   6   1   14.30    5.40
  -6  -6  -1  417.06   46.70
  -6  -6  -1  434.76   48.10
  -6  -6  -1  495.95   49.50
   6   6   1  412.26   41.90
   6   6   1  429.66   42.00
   6   6   1  405.46   42.10
   6   6   1  397.86   42.20
  -7  -6  -1  437.56   46.30
  -7  -6  -1  352.36   40.70
   7   6   1  351.86   33.80
   7   6   1  318.27   33.80
   7   6   1  334.37   33.40
   7   6   1  289.27   34.40
   7   6   1  329.97   33.80
  -8  -6  -1  227.18   37.40
  -8  -6  -1  222.78   43.60
  -8  -6  -1  313.67   41.20
   8   6   1  200.58   23.50
   8   6   1  216.18   22.90
   8   6   1  232.58   22.40
   8   6   1  202.88   23.20
  -9  -6  -1   97.29   32.00
  -9  -6  -1  108.29   28.70
  -9  -6  -1  -15.70   36.00
  -9  -6  -1   65.79   26.60
   9   6   1   48.10    8.20
   9   6   1   33.60    6.60
   9   6   1   50.69    7.90
   9   6   1   49.70    7.40
 -10  -6  -1   95.09   33.30
 -10  -6  -1   75.49   37.20
 -10  -6  -1   -6.90   81.19
 -10  -6  -1   64.89   32.70
  10   6   1   26.30    6.10
  10   6   1   17.50    7.90
  10   6   1   27.10    6.20
  10   6   1   16.20    6.80
  11  -7  -1  -22.10   27.40
  11  -7  -1   -6.70   18.70
 -11   7   1  -66.79   63.39
 -11   7   1   10.10   22.60
 -11   7   1  -13.70   54.79
  10  -7  -1  -41.50   36.80
  10  -7  -1    4.30   22.90
  10  -7  -1  -25.70   22.60
 -10   7   1   12.70    9.70
 -10   7   1   18.30   43.30
 -10   7   1  -58.59   51.79
   9  -7  -1  -38.00   21.10
   9  -7  -1    3.20   16.50
   9  -7  -1  -44.10   30.60
  -9   7   1  -34.10   43.70
  -9   7   1    9.00    7.50
  -9   7   1   -5.50   14.40
  -9   7   1  -45.50   34.00
   8  -7  -1  329.87   36.60
   8  -7  -1  246.78   48.70
  -8   7   1  413.86   49.60
  -8   7   1  349.27   49.60
  -8   7   1  288.77   35.40
   7  -7  -1   -0.90    9.60
   7  -7  -1    4.60   12.30
   7  -7  -1    1.60   17.20
   7  -7  -1    8.60    9.00
   7  -7  -1   -3.60   26.00
  -7   7   1   12.10   21.90
  -7   7   1   12.50    6.70
  -7   7   1   10.80    4.70
  -7   7   1  -12.00   21.60
  -7   7   1    5.60    8.60
  -7   7   1  -23.50   35.70
   6  -7  -1   37.90   13.40
   6  -7  -1   51.89    9.50
   6  -7  -1   45.40    9.30
   6  -7  -1   75.19   26.20
   6  -7  -1   40.00   12.90
  -6   7   1   38.00    7.60
  -6   7   1   27.00    8.40
  -6   7   1  -18.90   27.60
  -6   7   1   48.80    6.40
  -6   7   1   55.19   20.00
  -6   7   1   56.89   16.60
   5  -7  -1   51.39    9.00
   5  -7  -1   65.19   19.90
   5  -7  -1   71.69   10.90
   5  -7  -1   88.69   16.60
   5  -7  -1   55.49   11.90
  -5   7   1   67.29   10.30
  -5   7   1   44.10    7.60
  -5   7   1   56.79    7.20
  -5   7   1    7.50   24.30
  -5   7   1   46.30   12.80
   4  -7  -1   19.00    6.40
   4  -7  -1   12.70    6.60
   4  -7  -1    2.80   14.60
   4  -7  -1    8.50    5.00
   4  -7  -1   13.00   17.70
  -4   7   1   23.50    9.40
  -4   7   1   16.00    6.30
  -4   7   1   14.00    3.20
  -4   7   1   33.30   15.90
  -4   7   1  -18.70   21.30
   3  -7  -1  831.62   82.39
   3  -7  -1  805.42   80.29
   3  -7  -1  778.02   80.49
  -3   7   1  699.93   79.89
  -3   7   1  814.32   79.69
  -3   7   1  859.21   80.99
  -3   7   1  867.01   80.79
   2  -7  -1   26.30    8.30
   2  -7  -1   26.20    5.30
   2  -7  -1   -9.10   30.00
   2  -7  -1   34.10    6.80
   2  -7  -1   23.90    5.40
  -2   7   1   23.50    5.80
  -2   7   1   26.30    4.70
  -2   7   1   -3.30   13.90
  -2   7   1   34.70    5.30
  -2   7   1   45.60   16.70
  -2   7   1   10.70    6.50
   1  -7  -1  148.19   16.80
   1  -7  -1  144.29   16.10
   1  -7  -1  139.49   17.30
   1  -7  -1  145.29   15.70
  -1   7   1  158.18   17.00
  -1   7   1  124.39   18.30
  -1   7   1  165.08   16.10
  -1   7   1  145.39   15.90
   0  -7  -1   68.59   12.50
   0  -7  -1    7.60   31.10
   0  -7  -1   82.59    9.20
   0  -7  -1   81.49    9.60
   0  -7  -1   86.69   10.50
   0   7   1  105.79   11.00
   0   7   1   78.59   12.60
   0   7   1   62.49   10.50
   0   7   1   99.99   12.30
  -1  -7  -1  549.05   62.69
  -1  -7  -1  617.44   61.59
  -1  -7  -1  592.14   62.49
   1   7   1  630.84   61.99
   1   7   1  640.44   61.79
   1   7   1  691.33   62.09
  -2  -7  -1  111.59   17.10
  -2  -7  -1  122.29   15.60
   2   7   1  138.79   15.10
   2   7   1  158.98   15.10
   2   7   1  149.39   14.60
   2   7   1  150.58   14.60
   2   7   1  111.19   15.00
  -3  -7  -1  252.97   30.60
  -3  -7  -1  251.67   39.80
  -3  -7  -1  237.88   28.50
   3   7   1  306.27   27.30
   3   7   1  305.47   27.80
   3   7   1  250.57   27.80
   3   7   1  256.77   27.60
   3   7   1  323.77   31.10
   3   7   1  252.27   27.60
  -4  -7  -1   28.00   25.90
  -4  -7  -1   21.80    7.40
  -4  -7  -1   13.00   10.10
   4   7   1   13.90    3.40
   4   7   1   24.60    8.30
   4   7   1   15.00    3.90
   4   7   1   14.00    4.40
  -5  -7  -1   30.00   25.30
  -5  -7  -1    3.10   17.00
  -5  -7  -1    2.40   10.00
  -5  -7  -1   10.10   10.00
   5   7   1   -3.80    3.60
   5   7   1    3.00    4.40
   5   7   1    7.50    2.90
   5   7   1    5.10    3.90
  -6  -7  -1  157.58   22.20
  -6  -7  -1  139.39   23.70
  -6  -7  -1  135.29   28.20
   6   7   1  137.39   13.80
   6   7   1  113.09   14.10
   6   7   1  115.99   14.40
  -7  -7  -1    5.80   23.20
  -7  -7  -1   -3.50   15.40
  -7  -7  -1  -37.70   23.80
   7   7   1    1.50    5.00
   7   7   1   -6.00    4.60
   7   7   1    0.90    2.70
   7   7   1    1.20    3.50
  -8  -7  -1   27.00   22.10
  -8  -7  -1   43.00   31.90
  -8  -7  -1   43.70   29.10
   8   7   1    2.20    5.30
   8   7   1   12.50    3.60
   8   7   1   13.80    6.20
   8   7   1   15.70    4.50
  -9  -7  -1    3.50   26.80
  -9  -7  -1   10.30   42.20
   9   7   1   -0.30    6.60
   9   7   1    1.80    5.60
   9   7   1   -4.80    6.60
   9   7   1    3.10    4.50
 -10  -7  -1  175.18   39.50
  10   7   1  150.28   18.90
  10   7   1  144.89   17.50
  10   7   1  157.18   17.30
  10   7   1  151.58   17.50
  10  -8  -1  -50.19   26.00
  10  -8  -1   -1.00   23.80
 -10   8   1   33.50   57.99
 -10   8   1   10.00   18.40
 -10   8   1   17.90   10.10
 -10   8   1   19.60   53.59
   9  -8  -1   28.30   39.70
   9  -8  -1    2.50   18.60
   9  -8  -1  -11.30   28.60
  -9   8   1    6.10   15.00
  -9   8   1    0.90    7.60
  -9   8   1    5.00   50.49
  -9   8   1  -19.40   35.10
   8  -8  -1  -12.30   13.30
   8  -8  -1   27.90   31.60
   8  -8  -1   -1.40   25.10
  -8   8   1  -21.80   44.80
  -8   8   1    5.50    5.90
  -8   8   1   -1.00   10.00
  -8   8   1   16.90   29.70
   7  -8  -1  167.48   26.10
   7  -8  -1  197.68   33.00
   7  -8  -1  170.98   29.70
   7  -8  -1  127.19   36.90
   7  -8  -1  187.38   25.10
  -7   8   1  103.59   41.90
  -7   8   1  242.68   32.80
  -7   8   1  156.68   22.00
  -7   8   1  193.18   19.50
   6  -8  -1  476.35   58.19
   6  -8  -1  540.65   56.79
   6  -8  -1  508.55   53.69
   6  -8  -1  531.95   65.59
  -6   8   1  555.84   52.09
  -6   8   1  512.45   52.29
   5  -8  -1  115.09   22.40
   5  -8  -1  112.99   14.20
   5  -8  -1   78.99   13.50
   5  -8  -1  103.89   17.60
   5  -8  -1   90.29   22.00
  -5   8   1   30.10   31.80
  -5   8   1  148.69   24.20
  -5   8   1  141.89   19.80
  -5   8   1   90.99   11.50
  -5   8   1   79.19   13.30
   4  -8  -1   -6.50    7.10
   4  -8  -1   -0.90   22.60
   4  -8  -1    2.40   14.20
   4  -8  -1    9.30    7.80
   4  -8  -1   -1.20    5.80
  -4   8   1    1.10    3.00
  -4   8   1   -1.40    3.60
  -4   8   1  -13.10    8.00
  -4   8   1    2.00   19.70
  -4   8   1   12.70   21.70
  -4   8   1    2.40    7.00
   3  -8  -1  359.96   36.10
   3  -8  -1  329.37   36.40
   3  -8  -1  310.27   35.70
   3  -8  -1  299.27   38.70
  -3   8   1  398.06   36.30
  -3   8   1  370.66   36.80
  -3   8   1  349.47   35.00
  -3   8   1  345.87   34.70
   2  -8  -1  108.49   12.80
   2  -8  -1   98.89   14.50
   2  -8  -1    7.00   40.60
   2  -8  -1  126.89   13.10
   2  -8  -1  111.19   15.00
  -2   8   1   96.49   12.40
  -2   8   1   80.09   12.70
  -2   8   1  103.09   22.80
  -2   8   1  119.79   15.30
  -2   8   1  111.69   13.20
   1  -8  -1   91.69   16.20
   1  -8  -1  129.39   14.90
   1  -8  -1  120.09   13.90
   1  -8  -1  106.19   13.70
   1  -8  -1   42.80   45.20
  -1   8   1  108.69   14.70
  -1   8   1  139.49   13.90
  -1   8   1  158.18   16.00
  -1   8   1  159.18   22.30
  -1   8   1  114.09   15.60
   0  -8  -1   50.19    7.00
   0  -8  -1   57.09   10.20
   0  -8  -1   16.20   39.80
   0  -8  -1   48.30    8.10
   0   8   1   61.49    8.10
   0   8   1   58.79   10.10
   0   8   1   60.19    9.70
   0   8   1   36.10   11.70
   0   8   1   43.80    8.50
  -1  -8  -1  250.97   28.00
  -1  -8  -1  232.38   26.00
  -1  -8  -1  228.28   25.00
   1   8   1  267.47   25.80
   1   8   1  243.58   26.20
   1   8   1  279.07   25.90
   1   8   1  227.48   27.10
  -2  -8  -1  391.06   44.10
  -2  -8  -1  460.65   43.20
   2   8   1  410.66   42.70
   2   8   1  379.76   42.90
   2   8   1  453.35   42.50
   2   8   1  430.46   42.50
   2   8   1  424.16   42.60
  -3  -8  -1  275.87   38.50
  -3  -8  -1  378.16   52.29
   3   8   1  378.46   35.80
   3   8   1  351.36   36.10
   3   8   1  325.87   36.10
   3   8   1  370.86   36.00
   3   8   1  388.86   35.70
  -4  -8  -1   -9.90   21.10
  -4  -8  -1    2.30    7.50
  -4  -8  -1   21.90   29.40
  -4  -8  -1    4.50   11.30
   4   8   1   13.30    3.50
   4   8   1    6.80    4.50
   4   8   1   -2.70    9.10
   4   8   1    9.40    4.30
   4   8   1    5.00    4.60
  -5  -8  -1   -2.60   10.60
  -5  -8  -1   19.50   37.20
  -5  -8  -1   28.90   10.80
   5   8   1    3.80    7.40
   5   8   1    1.40    3.50
   5   8   1    5.80    4.50
   5   8   1   -0.30    4.90
  -6  -8  -1   32.70   31.00
  -6  -8  -1   21.10   15.00
  -6  -8  -1    6.20   16.10
   6   8   1    6.60    4.40
   6   8   1   10.40    3.40
   6   8   1   13.30    5.20
  -7  -8  -1  169.98   30.60
  -7  -8  -1  131.59   24.80
   7   8   1  115.29   14.20
   7   8   1  149.59   16.20
   7   8   1  128.19   15.90
   7   8   1  160.68   15.20
  -8  -8  -1   -1.40   38.80
  -8  -8  -1  -24.50   34.60
  -8  -8  -1   -7.40   23.00
   8   8   1    5.40    4.00
   8   8   1   -0.90    6.30
   8   8   1    5.70    5.90
   8   8   1    0.20    3.70
  -9  -8  -1  180.48   51.89
  -9  -8  -1  173.38   33.80
   9   8   1  121.39   14.20
   9   8   1   94.99   15.20
   9   8   1  103.29   13.00
  10  -9  -1   -5.60   27.10
 -10   9   1  -28.70   52.79
 -10   9   1   -7.70   63.49
 -10   9   1    8.40   10.50
 -10   9   1   15.70   18.90
   9  -9  -1   12.80   34.00
   9  -9  -1   -4.90   19.50
  -9   9   1   14.90    8.30
   8  -9  -1  -26.20   24.20
   8  -9  -1  -25.50   34.70
   8  -9  -1   -2.50   14.50
  -8   9   1    4.90   10.90
  -8   9   1  -36.40   46.40
  -8   9   1   -1.50   29.00
  -8   9   1    7.30    6.60
   7  -9  -1   30.90   18.10
   7  -9  -1   49.90   13.00
   7  -9  -1   72.29   30.80
   7  -9  -1   53.09   20.00
  -7   9   1   27.90   10.60
  -7   9   1   78.09   23.20
  -7   9   1   38.90    7.40
  -7   9   1   -3.70   45.80
   6  -9  -1  449.46   48.30
   6  -9  -1  306.57   38.50
   6  -9  -1  317.97   40.30
   6  -9  -1  422.76   41.30
   6  -9  -1  435.06   56.69
  -6   9   1  325.77   38.70
  -6   9   1  344.27   36.40
   5  -9  -1   35.90   25.90
   5  -9  -1   56.09   10.70
   5  -9  -1   72.69   13.80
   5  -9  -1   77.79   22.80
  -5   9   1    5.00   34.70
  -5   9   1   66.99    8.60
  -5   9   1   69.39    9.70
  -5   9   1   65.89   11.50
   4  -9  -1   60.39   10.50
   4  -9  -1   88.59   18.20
   4  -9  -1   29.40   31.30
   4  -9  -1   83.09   14.20
   4  -9  -1   88.19   12.90
  -4   9   1   79.09    8.90
  -4   9   1   53.39   11.30
  -4   9   1   60.89    9.70
   3  -9  -1   37.50    7.40
   3  -9  -1   34.30    9.80
   3  -9  -1   21.70    8.00
   3  -9  -1    0.60   40.50
  -3   9   1   55.49    9.20
  -3   9   1   26.80    9.40
  -3   9   1   34.10    6.30
  -3   9   1   -4.30   24.00
  -3   9   1   35.50    5.50
   2  -9  -1  151.98   15.60
   2  -9  -1   38.00   52.79
   2  -9  -1  132.69   19.50
   2  -9  -1  125.79   17.40
   2  -9  -1  106.99   15.10
  -2   9   1  150.08   15.50
  -2   9   1  121.99   18.40
  -2   9   1  129.09   15.30
  -2   9   1  106.49   15.00
  -2   9   1  131.29   26.60
   1  -9  -1   29.40    9.90
   1  -9  -1   34.00   66.49
   1  -9  -1   33.90    6.10
   1  -9  -1   17.90    6.40
   1  -9  -1   49.00    9.20
  -1   9   1   34.90    6.60
  -1   9   1   29.90    8.30
  -1   9   1   61.59   24.00
  -1   9   1   16.70   16.30
  -1   9   1   37.30    6.40
  -1   9   1   20.90    9.40
   0  -9  -1   59.89   11.30
   0  -9  -1   83.09    9.70
   0  -9  -1   74.79    9.70
   0  -9  -1   21.10   44.90
   0  -9  -1   74.39   13.20
   0   9   1   58.29   10.60
   0   9   1   92.69   12.50
   0   9   1   84.29   14.60
   0   9   1   93.99   11.70
  -1  -9  -1   95.29   16.90
  -1  -9  -1   74.39   14.60
  -1  -9  -1   17.60   38.00
  -1  -9  -1  110.59   13.70
  -1  -9  -1   93.99   11.70
   1   9   1   97.09   13.80
   1   9   1  134.09   13.20
   1   9   1  128.89   14.70
   1   9   1  102.69   16.30
  -2  -9  -1   79.79   13.70
  -2  -9  -1   64.29   18.30
  -2  -9  -1   56.99    9.10
  -2  -9  -1   59.59   10.40
  -2  -9  -1   -4.00   30.70
   2   9   1   76.39   10.00
   2   9   1  128.69   23.90
   2   9   1   82.39   12.50
   2   9   1   78.59    9.90
  -3  -9  -1  262.27   33.80
  -3  -9  -1  358.16   50.79
   3   9   1  313.37   31.40
   3   9   1  307.27   30.90
   3   9   1  365.46   36.90
   3   9   1  296.57   31.20
   3   9   1  270.87   31.50
  -4  -9  -1  248.38   29.80
  -4  -9  -1  197.88   28.10
   4   9   1  276.07   26.10
   4   9   1  248.08   25.90
   4   9   1  245.78   25.20
  -5  -9  -1  102.19   36.50
  -5  -9  -1   43.80   13.00
  -5  -9  -1   37.10   14.20
   5   9   1   61.69    8.30
   5   9   1   45.50    7.10
   5   9   1   52.59    7.80
  -6  -9  -1  183.08   30.10
  -6  -9  -1  136.99   24.10
   6   9   1  151.38   17.20
   6   9   1  171.18   18.20
   6   9   1  151.78   18.20
  -7  -9  -1   23.10   34.90
  -7  -9  -1   21.00   20.60
  -7  -9  -1   -7.30   25.10
   7   9   1    3.40    6.10
   7   9   1    3.00    3.50
   7   9   1   -0.40    6.40
   7   9   1   -7.70    4.90
  -8  -9  -1   78.19   41.50
  -8  -9  -1   14.00   24.70
  -8  -9  -1   38.00   38.60
   8   9   1    6.10    9.20
   8   9   1   11.50    7.10
   8   9   1    8.60    4.30
   8   9   1    3.10    6.40
  -9  -9  -1   76.09   55.29
  -9  -9  -1    4.70   32.30
  -9  -9  -1   30.90   41.00
   9   9   1   12.20    5.00
   9   9   1    7.80    6.90
   9   9   1   14.70    5.80
  10 -10  -1    0.40   28.60
  10 -10  -1  -28.90   30.80
 -10  10   1   21.90   21.80
 -10  10   1  -80.69   52.89
 -10  10   1   86.39   75.09
 -10  10   1   25.00   11.50
   9 -10  -1   17.20   21.20
   9 -10  -1    7.50   39.60
  -9  10   1   22.40    9.30
  -9  10   1   11.20   40.00
  -9  10   1  -83.29   66.09
  -9  10   1    0.80   16.50
   8 -10  -1   83.69   30.00
   8 -10  -1   75.69   41.80
   8 -10  -1   74.29   19.80
  -8  10   1   80.39   11.50
  -8  10   1   22.30   55.29
  -8  10   1   76.89   17.20
  -8  10   1  110.09   32.20
   7 -10  -1  -10.80   30.00
   7 -10  -1    3.70   11.30
   7 -10  -1    8.80   19.50
   7 -10  -1    8.50   21.40
  -7  10   1    7.30    6.30
  -7  10   1  -64.09   49.99
  -7  10   1   -1.30   10.10
  -7  10   1    3.60   21.00
   6 -10  -1   -1.80    9.90
   6 -10  -1  -10.40   15.40
   6 -10  -1    3.60   26.90
   6 -10  -1  -18.40   14.60
  -6  10   1    0.40    6.30
  -6  10   1  -82.89   42.00
  -6  10   1   -3.10   13.40
  -6  10   1    2.60   10.70
   5 -10  -1  161.88   37.70
   5 -10  -1  178.98   25.40
   5 -10  -1  181.08   22.30
   5 -10  -1  213.28   24.40
  -5  10   1  135.39   21.00
  -5  10   1  167.58   18.50
  -5  10   1  145.89   17.40
   4 -10  -1  207.48   24.80
   4 -10  -1   92.59   46.50
   4 -10  -1  218.48   29.60
   4 -10  -1  182.78   27.00
  -4  10   1  210.18   22.10
  -4  10   1  230.98   24.50
  -4  10   1  192.78   41.60
  -4  10   1  203.18   21.30
  -4  10   1  195.08   31.10
   3 -10  -1  327.77   35.50
   3 -10  -1  316.77   35.80
   3 -10  -1  283.87   33.20
   3 -10  -1  295.97   33.50
  -3  10   1  292.97   32.60
  -3  10   1  362.16   33.50
  -3  10   1  411.86   53.49
  -3  10   1  306.07   32.10
   2 -10  -1  104.79   16.30
   2 -10  -1  130.59   17.50
   2 -10  -1  115.69   15.70
   2 -10  -1   85.09   16.60
   2 -10  -1   45.50   66.49
  -2  10   1  129.09   15.40
  -2  10   1  141.09   15.40
  -2  10   1  128.29   15.40
  -2  10   1  175.98   26.60
  -2  10   1  117.39   19.50
   1 -10  -1   -1.40    6.40
   1 -10  -1   -1.50    6.70
   1 -10  -1   14.20   62.89
   1 -10  -1   -5.00    9.90
  -1  10   1   -2.10    6.70
  -1  10   1   57.39   28.80
  -1  10   1    0.20    8.00
  -1  10   1    1.90    6.60
  -1  10   1    4.30    8.50
   0 -10  -1  -19.50   49.70
   0 -10  -1   13.60   10.00
   0 -10  -1   13.00    5.00
   0 -10  -1   24.40    6.90
   0  10   1   41.60   26.00
   0  10   1   13.20    7.50
   0  10   1   37.40    8.40
   0  10   1   16.50    7.00
   0  10   1   23.60   13.20
  -1 -10  -1  397.86   44.20
  -1 -10  -1  416.26   43.00
  -1 -10  -1  385.96   46.00
   1  10   1  453.65   43.50
   1  10   1  447.16   44.30
   1  10   1  463.05   45.70
  -2 -10  -1   60.89   10.60
  -2 -10  -1   60.29   19.70
  -2 -10  -1   61.89   14.10
  -2 -10  -1   80.79   13.70
   2  10   1   79.89   12.40
   2  10   1  109.59   14.30
   2  10   1   86.89   12.50
   2  10   1   89.49   11.60
  -3 -10  -1   42.90   28.50
  -3 -10  -1    5.70    8.30
   3  10   1    3.60    5.70
   3  10   1   11.70    7.50
   3  10   1    8.10    5.00
   3  10   1    4.50    5.80
  -4 -10  -1  185.98   33.40
   4  10   1  250.57   25.90
   4  10   1  281.87   26.40
   4  10   1  244.08   26.90
   4  10   1  251.67   28.10
  -5 -10  -1   20.70   14.80
  -5 -10  -1   49.00   17.30
   5  10   1   66.19   11.40
   5  10   1   64.69    8.70
   5  10   1   96.29   11.10
  -6 -10  -1  166.28   26.40
  -6 -10  -1  152.98   27.10
   6  10   1  141.59   18.00
   6  10   1  190.38   19.30
   6  10   1  187.68   20.10
   6  10   1  197.18   20.10
  -7 -10  -1   27.30   42.90
  -7 -10  -1   10.20   28.40
  -7 -10  -1   12.50   22.40
   7  10   1    6.30    5.40
   7  10   1    3.60    6.60
   7  10   1   -0.50   11.50
   7  10   1    0.80    4.00
  -8 -10  -1   33.00   45.80
  -8 -10  -1    0.00   42.00
  -8 -10  -1    7.00   39.20
   8  10   1    6.10    4.40
   8  10   1    2.50    5.60
   9 -11  -1    3.70   25.10
   9 -11  -1    5.70   44.40
  -9  11   1   16.20   16.80
  -9  11   1  -68.39   70.79
  -9  11   1  -33.10   37.40
  -9  11   1    7.10   10.00
   8 -11  -1   96.99   49.00
   8 -11  -1   52.99   21.70
   8 -11  -1  120.29   31.60
  -8  11   1   59.69   16.30
  -8  11   1   74.49   11.80
  -8  11   1  -87.09  106.89
  -8  11   1  156.08   43.20
   7 -11  -1   -3.80   19.80
   7 -11  -1   -8.40   27.00
   7 -11  -1    1.20   15.50
   7 -11  -1   37.90   36.00
  -7  11   1   -2.70   13.50
  -7  11   1   17.00   21.40
  -7  11   1   -1.50    7.00
  -7  11   1  -83.89   56.49
   6 -11  -1   30.20   13.60
   6 -11  -1   31.00   15.00
   6 -11  -1   38.60   20.70
   6 -11  -1   40.50   29.20
  -6  11   1   18.80    7.10
  -6  11   1   -9.80   46.90
  -6  11   1   12.10   13.20
  -6  11   1   11.00   15.30
   5 -11  -1   58.79   13.90
   5 -11  -1   29.20   17.20
   5 -11  -1   44.10   11.60
   5 -11  -1   56.79   25.60
  -5  11   1   39.20   13.30
  -5  11   1   47.90   41.40
  -5  11   1   31.20    7.70
   4 -11  -1   73.99   53.79
   4 -11  -1   61.79   17.00
   4 -11  -1   42.80   11.70
   4 -11  -1   32.00   15.60
   4 -11  -1   46.80   11.80
  -4  11   1   58.09   10.70
  -4  11   1   29.10   13.60
  -4  11   1   41.40    7.00
  -4  11   1   39.40    8.80
  -4  11   1  115.69   34.60
  -4  11   1   83.89   38.20
   3 -11  -1   23.40   13.60
   3 -11  -1   10.70    8.40
   3 -11  -1   16.30   69.09
   3 -11  -1    3.80    7.70
   3 -11  -1  -12.50   11.60
  -3  11   1  -18.50   49.60
  -3  11   1   -0.90    5.60
  -3  11   1   -2.60    6.60
  -3  11   1  -13.50   28.30
  -3  11   1    7.90    7.60
  -3  11   1   -5.80   12.10
   2 -11  -1   17.80   81.39
   2 -11  -1   17.20    7.70
   2 -11  -1   16.90    9.40
   2 -11  -1   11.90   12.70
   2 -11  -1   14.40    9.20
  -2  11   1    9.90   13.20
  -2  11   1   23.40    8.00
  -2  11   1   20.60    7.80
  -2  11   1   23.40    7.90
  -2  11   1    7.60   24.20
  -2  11   1   32.00   32.20
   1 -11  -1  411.16   40.20
   1 -11  -1  193.88   87.19
   1 -11  -1  333.57   39.80
  -1  11   1  402.26   42.60
  -1  11   1  446.26   40.80
   0 -11  -1   76.49   11.30
   0 -11  -1   58.99   15.00
   0 -11  -1   45.70    7.80
   0 -11  -1   58.29   64.09
   0  11   1   64.19   10.00
   0  11   1   72.89   16.40
   0  11   1   30.90   10.30
  -1 -11  -1   77.59   16.10
  -1 -11  -1   78.49   11.50
  -1 -11  -1   65.09   55.59
  -1 -11  -1   96.59   15.00
   1  11   1   63.79   12.50
   1  11   1  115.09   16.40
   1  11   1  122.09   16.90
   2  11   1  586.34   54.49
   2  11   1  444.96   54.49
   2  11   1  513.95   55.79
   2  11   1  594.74   54.39
  -3 -11  -1  -18.60   28.30
  -3 -11  -1   -8.10   13.80
  -3 -11  -1   -2.60    9.80
   3  11   1   -0.10    7.10
   3  11   1    8.40    5.90
   3  11   1    8.20    8.80
   3  11   1   -0.80    5.50
  -4 -11  -1   20.80   15.60
  -4 -11  -1   26.10   12.10
  -4 -11  -1   95.89   40.60
   4  11   1   39.10    7.10
   4  11   1   37.20    6.70
   4  11   1   27.20    8.20
  -5 -11  -1    9.90   14.60
  -5 -11  -1    9.90   16.50
   5  11   1   23.80    7.20
   5  11   1   33.50    8.20
   5  11   1   19.50    8.60
   5  11   1   22.10    5.30
  -6 -11  -1  127.09   23.50
  -6 -11  -1  103.09   24.70
   6  11   1   99.29   13.60
   6  11   1   98.79   14.80
   6  11   1   85.69   11.40
  -7 -11  -1    6.70   30.50
  -7 -11  -1   52.09   46.50
  -7 -11  -1   31.40   24.90
   7  11   1   -5.90    5.40
   7  11   1   -0.90    4.10
   7  11   1   -3.60    7.70
  -8 -11  -1  398.36   57.49
  -8 -11  -1  352.46   45.90
   8  11   1  277.47   29.90
   8  11   1  232.58   28.40
   8  11   1  304.07   29.20
   8 -12  -1   65.99   22.40
   8 -12  -1   58.39   45.10
  -8  12   1  106.69   30.50
  -8  12   1   77.49   73.99
  -8  12   1   55.39   11.50
  -8  12   1   40.70   18.10
   7 -12  -1   25.80   21.70
   7 -12  -1    0.20   17.50
   7 -12  -1   27.90   34.30
   7 -12  -1  -33.80   34.50
  -7  12   1   21.40   21.30
  -7  12   1   12.50   60.39
  -7  12   1    7.70   13.80
  -7  12   1    5.20    8.00
   6 -12  -1    1.40   25.80
   6 -12  -1   10.60   26.70
   6 -12  -1  -10.80   14.00
   6 -12  -1   18.30   16.30
  -6  12   1   14.30   15.60
  -6  12   1   25.50   54.09
  -6  12   1   15.70   15.30
  -6  12   1   13.30    7.60
   5 -12  -1   54.99   21.10
   5 -12  -1   34.50   21.00
   5 -12  -1   25.30   12.30
   5 -12  -1   31.10   14.50
  -5  12   1   24.90    8.10
  -5  12   1   13.50   14.40
  -5  12   1   52.49   45.40
  -5  12   1   15.10   12.40
   4 -12  -1   13.00   12.00
   4 -12  -1   16.40   16.60
   4 -12  -1   19.30   12.50
   4 -12  -1   22.00   17.90
  -4  12   1    8.70    9.50
  -4  12   1   -4.80   12.50
  -4  12   1   10.80    7.60
  -4  12   1   20.20   38.00
   3 -12  -1   48.10   13.10
   3 -12  -1   41.20   11.60
   3 -12  -1   39.70   17.80
   3 -12  -1   -7.80   92.59
   3 -12  -1   48.80   14.50
  -3  12   1   62.79   34.70
  -3  12   1   29.80   15.90
  -3  12   1   65.59   11.10
  -3  12   1   93.99   40.60
  -3  12   1   36.20   13.60
  -3  12   1   61.59   10.20
   2 -12  -1   20.30   18.30
   2 -12  -1    5.80    9.20
   2 -12  -1   26.90   15.60
   2 -12  -1    2.00   99.79
   2 -12  -1   15.20    8.60
  -2  12   1   17.10   40.30
  -2  12   1   17.80    8.90
  -2  12   1    7.30   13.30
  -2  12   1   20.60   26.80
  -2  12   1    6.80    8.90
   1 -12  -1  277.37   40.70
   1 -12  -1  317.57   34.10
   1 -12  -1  285.07   35.50
   1 -12  -1  219.78  102.89
   1 -12  -1  339.27   34.00
  -1  12   1  373.56   35.10
  -1  12   1  318.57   37.30
   0 -12  -1  133.29   86.09
   0 -12  -1  238.58   36.80
   0 -12  -1  349.17   31.60
   0 -12  -1  283.37   33.00
   0  12   1  279.97   33.10
  -1 -12  -1   37.10   10.80
  -1 -12  -1   17.00   15.20
  -1 -12  -1   11.30    6.50
   1  12   1   -1.10   14.10
   1  12   1    5.00    7.90
   1  12   1   25.00    9.10
   1  12   1   11.90    9.30
  -2 -12  -1   54.99   18.40
  -2 -12  -1   74.69   15.10
   2  12   1   93.09   14.20
   2  12   1   95.29   15.50
   2  12   1  119.09   20.00
   2  12   1  111.79   14.60
  -3 -12  -1   -0.40   15.70
  -3 -12  -1   90.69   33.60
  -3 -12  -1    6.60   11.50
   3  12   1   25.90    7.80
   3  12   1   29.80    7.60
   3  12   1   23.30   11.20
   3  12   1   19.10    8.90
  -4 -12  -1  167.78   29.20
  -4 -12  -1  173.98   29.10
   4  12   1  202.88   22.70
   4  12   1  211.98   23.60
   4  12   1  234.78   25.40
   4  12   1  221.68   24.20
  -5 -12  -1   54.59   20.80
  -5 -12  -1   54.99   17.60
   5  12   1   63.49   10.30
   5  12   1   69.89   10.50
   5  12   1   68.89   11.50
  -6 -12  -1   29.50   38.90
  -6 -12  -1   64.49   24.10
   6  12   1   61.19    9.80
   6  12   1   91.49   12.60
   6  12   1   59.19   11.30
  -7 -12  -1   77.49   33.80
  -7 -12  -1  105.79   54.19
  -7 -12  -1    0.30   27.10
   7  12   1   15.70    8.80
   7 -13  -1  -23.90   19.10
  -7  13   1   57.49   69.39
  -7  13   1   -3.20   17.20
  -7  13   1    4.80    9.50
   6 -13  -1  132.59   22.00
   6 -13  -1  121.49   36.00
   6 -13  -1  120.69   31.00
   6 -13  -1  117.39   23.60
  -6  13   1  108.89   16.60
  -6  13   1   85.79   21.10
   5 -13  -1    7.00   25.50
   5 -13  -1    1.50   13.50
   5 -13  -1   -0.20   21.30
   5 -13  -1   13.20   15.30
  -5  13   1   -3.80    8.50
  -5  13   1   21.40   14.90
  -5  13   1    6.40   12.40
  -5  13   1  -34.20   50.19
   4 -13  -1  276.37   44.20
   4 -13  -1  351.06   39.80
   4 -13  -1  331.27   40.50
  -4  13   1  362.66   37.00
  -4  13   1  355.56   43.10
   3 -13  -1   22.50   14.60
   3 -13  -1   12.30   11.80
   3 -13  -1   20.10   11.90
  -3  13   1   33.90   35.90
  -3  13   1   12.80   16.10
  -3  13   1    5.90    8.90
  -3  13   1    9.60    9.60
   2 -13  -1  335.57   35.20
   2 -13  -1  277.77   35.20
   2 -13  -1  210.88  168.08
   2 -13  -1  288.97   34.80
   2 -13  -1  266.37   42.30
  -2  13   1  311.77   37.30
  -2  13   1  360.16   34.80
   1 -13  -1   98.99   17.10
   1 -13  -1   82.99  118.79
   1 -13  -1   78.69   21.60
   1 -13  -1  116.19   17.30
  -1  13   1  162.48   21.40
  -1  13   1  104.49   18.90
  -1  13   1  172.18   50.39
  -1  13   1  128.99   18.80
   0 -13  -1   52.39   18.80
   0 -13  -1   57.49   13.70
   0 -13  -1   54.59   10.20
   0  13   1   66.69   13.50
   0  13   1  112.09   22.10
   0  13   1   56.49   11.30
   0  13   1   39.50   14.10
  -1 -13  -1   39.10   13.00
  -1 -13  -1   48.90   18.20
   1  13   1   32.50   12.30
   1  13   1   87.29   17.90
   1  13   1   65.59   12.40
   1  13   1   43.50   10.60
  -2 -13  -1  181.98   29.70
  -2 -13  -1  174.38   27.40
   2  13   1  256.87   25.70
   2  13   1  198.88   25.60
   2  13   1  200.68   24.40
  -3 -13  -1   11.30   16.30
  -3 -13  -1    3.50   13.60
   3  13   1   27.40   12.40
   3  13   1    1.20    8.30
   3  13   1    7.60    9.50
   3  13   1   20.70    8.70
  -4 -13  -1   58.29   20.60
  -4 -13  -1   35.40   16.40
   4  13   1   37.50   10.40
   4  13   1   36.50   14.20
   4  13   1   30.50    8.00
  -5 -13  -1  102.69   22.70
  -5 -13  -1  110.19   28.40
   5  13   1  135.79   17.10
   5  13   1  111.29   15.10
  -6 -13  -1   16.50   55.69
  -6 -13  -1   17.20   25.00
  -6 -13  -1   -5.30   25.30
   6  13   1    3.10    9.60
   6  13   1    0.00    5.90
   6  13   1    0.40    8.00
   6 -14  -1  -15.10   19.80
   6 -14  -1  -12.30   28.00
   6 -14  -1    0.60   39.30
  -6  14   1   -9.90   64.69
  -6  14   1  -20.00   20.10
   5 -14  -1   22.20   23.60
   5 -14  -1    8.30   20.20
   5 -14  -1   -4.30   30.90
   5 -14  -1   35.10   16.90
  -5  14   1   73.69   52.69
  -5  14   1   -4.30   19.40
  -5  14   1   22.90   10.10
   4 -14  -1   29.40   19.60
   4 -14  -1   -7.00   15.40
   4 -14  -1  -31.00   18.50
   4 -14  -1  -16.80   26.10
  -4  14   1   73.09   47.30
  -4  14   1   21.90   10.70
  -4  14   1   23.70   32.70
   3 -14  -1   57.99   15.90
   3 -14  -1   49.00   17.60
   3 -14  -1   17.50   23.70
   3 -14  -1   45.20   17.20
  -3  14   1   43.90   12.50
  -3  14   1  153.28   41.30
  -3  14   1   25.90   18.20
   2 -14  -1   35.40   13.00
   2 -14  -1   21.90   14.10
   2 -14  -1   10.60   20.90
  -2  14   1  110.79   34.10
  -2  14   1   27.40   18.50
  -2  14   1   46.30   12.60
   1 -14  -1   -6.20   13.50
   1 -14  -1   -4.20   10.00
   1 -14  -1   37.40   21.10
  -1  14   1    1.70   12.60
  -1  14   1    8.70   11.20
  -1  14   1   -8.60   15.30
   0 -14  -1  108.19   18.30
   0 -14  -1   57.69   23.60
   0  14   1  124.89   18.30
   0  14   1   83.49   17.80
  -1 -14  -1  436.46   48.90
  -1 -14  -1  354.26   53.99
   1  14   1  508.65   46.70
   1  14   1  420.96   48.20
  -2 -14  -1   11.10   14.20
  -2 -14  -1   18.40   20.90
   2  14   1   16.50    8.60
   2  14   1   -1.00   10.80
  -3 -14  -1   97.39   26.40
  -3 -14  -1   72.69   20.10
   3  14   1  128.69   18.00
   3  14   1  123.59   22.00
   3  14   1  109.09   17.70
  -4 -14  -1   26.10   20.10
  -4 -14  -1    0.70   27.00
   4  14   1    6.80    9.70
   4  14   1    6.80    8.70
   4  14   1   -7.70   10.60
  -5 -14  -1   65.59   22.60
  -5 -14  -1   73.69   27.10
   5  14   1   55.69   13.10
   5  14   1   53.59   10.20
   5 -15  -1   37.80   25.70
   5 -15  -1   33.70   22.20
   5 -15  -1    4.70   37.70
  -5  15   1   51.49   55.19
  -5  15   1    7.90   11.70
  -5  15   1  -14.10   22.00
   4 -15  -1   38.90   33.80
   4 -15  -1   24.90   31.70
   4 -15  -1   27.60   19.80
  -4  15   1   -7.40   13.00
  -4  15   1   17.90   47.30
  -4  15   1   17.50   22.50
   3 -15  -1  -23.90   26.40
   3 -15  -1   -9.90   16.70
   3 -15  -1   -6.30   16.80
  -3  15   1   24.80   41.70
  -3  15   1    3.60   20.30
   2 -15  -1   40.80   18.70
   2 -15  -1   43.30   27.00
   2 -15  -1   47.40   15.80
  -2  15   1   54.39   20.90
   1 -15  -1  216.38   34.10
  -1  15   1  257.67   34.30
   0 -15  -1  195.38   32.80
   0  15   1  207.78   30.10
   0  15   1  287.47   31.70
   0  15   1  213.58   28.70
  -1 -15  -1   82.49   18.90
  -1 -15  -1   64.59   41.10
   1  15   1   85.49   14.20
   1  15   1   65.89   17.60
  -2 -15  -1   16.20   24.50
  -2 -15  -1    5.90   16.90
   2  15   1    1.90   12.90
   2  15   1    2.50   10.50
   2  15   1    6.70   13.40
  -3 -15  -1   76.99   21.10
  -3 -15  -1   74.09   27.90
   3  15   1   87.79   16.90
   3  15   1   99.69   15.00
   3 -16  -1  231.98   38.90
  -3  16   1  311.47   43.50
  -3  16   1  329.47   37.40
   2 -16  -1  -20.80   29.20
   2 -16  -1   -5.40   20.90
  -2  16   1   23.80   21.20
  -2  16   1   -5.20   15.20
  -2  16   1   39.20   37.00
   1 -16  -1   -7.50   19.70
   1 -16  -1   22.60   29.30
  -1  16   1    5.40   17.80
  -1  16   1    0.60   14.20
   0 -16  -1  -19.80   28.80
   0 -16  -1   14.50   19.40
   0  16   1   -9.50   13.10
   0  16   1   -1.20   17.30
   0  16   1    4.70   16.20
  -1 -16  -1   40.40   30.10
  -1 -16  -1   28.10   19.70
   1  16   1   60.59   16.90
   1  16   1   34.50   13.20
   1  16   1   41.70   17.40
   2  16  -2   17.70   22.30
   2  16  -2   50.79   13.70
   2  16  -2   12.20   10.90
   2  16  -2   27.90   13.90
  -2 -16   2    7.30   25.50
  -2 -16   2   34.40   18.70
   1  16  -2  207.78   28.40
  -1 -16   2  155.38   32.90
  -1 -16   2  188.48   30.80
   0  16  -2    8.60   27.10
   0  16  -2   -6.30   14.00
   0  16  -2    4.70   12.20
   0 -16   2   11.10   24.80
   0 -16   2    7.90   17.10
  -1  16  -2  -12.80   14.30
  -1  16  -2   22.30   13.10
  -1  16  -2   88.79   33.30
   1 -16   2   -0.80   25.40
   1 -16   2    6.40   18.20
  -2  16  -2   30.80   39.20
  -2  16  -2   -5.70   18.60
   2 -16   2   67.99   43.30
   2 -16   2    2.90   19.70
  -3  16  -2   26.10   24.30
  -3  16  -2   47.90   20.80
  -3  16  -2  237.78   54.19
   3 -16   2   81.29   22.30
  -4  16  -2    3.80   21.10
  -4  16  -2    8.90   12.90
  -4  16  -2   99.99   53.69
   4 -16   2   -8.20   20.80
   4 -16   2   18.10   22.70
   4 -16   2   27.50   32.60
   4  15  -2    8.00    8.50
   4  15  -2   -1.80   10.60
   4  15  -2    5.60    9.00
  -4 -15   2  -18.70   47.00
  -4 -15   2   20.70   22.30
   3  15  -2  273.87   38.30
   3  15  -2  342.67   32.90
   3  15  -2  300.57   32.20
   3  15  -2  239.48   33.50
  -3 -15   2  262.57   43.00
   2  15  -2   18.70   10.20
   2  15  -2   11.80   17.70
   2  15  -2   -4.50   11.20
  -2 -15   2  -11.50   31.10
  -2 -15   2  -30.40   14.50
   1  15  -2    3.20   12.20
   1  15  -2   37.40   10.40
   1  15  -2   17.20   20.50
   1  15  -2   32.10   11.50
  -1 -15   2    9.10   13.60
  -1 -15   2   -3.40   20.50
   0  15  -2   76.39   13.70
   0  15  -2   92.09   24.50
   0  15  -2  121.29   20.10
   0 -15   2   43.60   23.00
   0 -15   2   40.50   15.00
  -1  15  -2  183.58   22.60
   1 -15   2  112.29   26.60
   1 -15   2  115.99   22.00
  -2  15  -2   36.50   16.40
  -2  15  -2   62.09   35.00
  -2  15  -2   31.90   12.40
   2 -15   2   32.70   15.00
   2 -15   2    7.90   21.50
  -3  15  -2   39.70   12.20
  -3  15  -2   99.19   40.70
  -3  15  -2   61.39   16.40
  -3  15  -2   44.30   18.80
   3 -15   2   46.00   23.80
   3 -15   2   41.80   17.60
   3 -15   2   28.00   22.70
   3 -15   2   17.00   16.80
  -4  15  -2   81.19   50.69
  -4  15  -2    3.30   14.20
  -4  15  -2  -12.60   17.90
  -4  15  -2    4.50   10.80
   4 -15   2   13.80   23.30
   4 -15   2   24.20   15.70
   4 -15   2    1.50   24.10
   4 -15   2    6.40   18.00
  -5  15  -2   19.60   18.70
  -5  15  -2   30.90   11.30
  -5  15  -2   57.39   17.80
  -5  15  -2   59.99   57.29
   5 -15   2   63.89   30.20
   5 -15   2   23.20   16.60
   5 -15   2   38.60   27.10
   5 -15   2   13.40   20.70
   5  14  -2   89.99   15.10
   5  14  -2  112.99   16.20
   5  14  -2  103.99   14.60
  -5 -14   2  121.89   23.20
  -5 -14   2  117.59   26.30
   4  14  -2   16.90    7.60
   4  14  -2   17.70    9.50
   4  14  -2   27.70   12.90
   4  14  -2   19.90    8.50
  -4 -14   2   40.20   43.20
  -4 -14   2    4.60   19.20
  -4 -14   2   -0.40   15.90
   3  14  -2   49.60   11.70
   3  14  -2   57.89   10.30
   3  14  -2   56.09   15.20
   3  14  -2   55.29   10.10
  -3 -14   2   23.00   14.80
  -3 -14   2   59.09   19.50
  -3 -14   2  151.28   36.00
   2  14  -2    3.30    9.50
   2  14  -2   11.00    8.40
   2  14  -2   -5.80    8.00
   2  14  -2   13.00   14.90
  -2 -14   2   10.40   12.40
  -2 -14   2    0.60   15.50
   1  14  -2  448.16   54.29
   1  14  -2  541.85   54.99
   1  14  -2  601.74   57.99
   1  14  -2  530.05   53.59
  -1 -14   2  491.85   58.99
   0  14  -2    8.70    9.00
   0  14  -2   11.10   10.40
   0  14  -2  -11.80   18.60
   0  14  -2   -9.00   11.50
   0 -14   2    1.20   11.60
   0 -14   2   -2.90   15.00
  -1  14  -2   15.20   12.00
  -1  14  -2    8.30   11.50
  -1  14  -2   40.90   24.30
  -1  14  -2   35.20   10.40
   1 -14   2   50.09   13.60
   1 -14   2   26.70   15.90
   1 -14   2   19.10   10.20
  -2  14  -2    5.60   12.70
  -2  14  -2    4.60    9.90
  -2  14  -2   19.50   10.50
  -2  14  -2   21.50   27.80
   2 -14   2   12.50   12.10
   2 -14   2   -0.60   17.20
   2 -14   2    4.50   15.10
   2 -14   2    7.90   13.60
  -3  14  -2   16.40   11.00
  -3  14  -2   15.60   35.60
  -3  14  -2  -17.00   15.30
  -3  14  -2    9.40    9.00
   3 -14   2   -8.50   12.20
   3 -14   2   26.80   18.50
   3 -14   2    2.50   13.20
   3 -14   2   29.60   18.20
  -4  14  -2   17.10    9.40
  -4  14  -2   45.20   16.30
  -4  14  -2   70.09   45.20
  -4  14  -2   30.50   13.20
   4 -14   2    9.00   23.00
   4 -14   2    5.20   15.30
   4 -14   2   13.90   14.70
   4 -14   2   19.80   19.40
  -5  14  -2   81.09   18.40
  -5  14  -2  124.69   53.99
  -5  14  -2   39.90   16.50
  -5  14  -2   19.40   10.20
   5 -14   2  102.69   29.70
   5 -14   2   57.49   21.50
   5 -14   2   41.20   16.60
   5 -14   2   50.09   18.60
  -6  14  -2    3.10    9.20
  -6  14  -2    2.00   21.40
  -6  14  -2   -2.70   16.10
  -6  14  -2   39.00   61.49
   6 -14   2  -13.00   16.50
   6 -14   2   17.50   24.70
   6 -14   2  -18.30   34.20
   6 -14   2    8.20   20.80
  -7  14  -2  -39.10   69.69
  -7  14  -2   18.70   10.70
  -7  14  -2   56.79   29.10
  -7  14  -2    0.40   16.50
   7 -14   2   66.79   42.20
   7 -14   2   38.20   31.40
   7 -14   2   11.60   19.10
   7  13  -2    0.70    5.00
   7  13  -2   -7.60    7.20
   7  13  -2    5.20    9.50
  -7 -13   2  -15.80   25.40
  -7 -13   2   41.70   46.40
   6  13  -2    5.40    8.40
   6  13  -2    3.20   11.10
   6  13  -2    8.20    7.80
   6  13  -2    2.20    5.10
  -6 -13   2   17.10   22.40
  -6 -13   2    0.00   22.30
  -6 -13   2   19.10   44.00
   5  13  -2    5.30   10.20
   5  13  -2    6.90    5.30
   5  13  -2   -5.90    8.30
  -5 -13   2   -8.80   18.00
  -5 -13   2   87.89   44.70
  -5 -13   2   -1.10   16.50
   4  13  -2   94.89   12.40
   4  13  -2  107.59   18.90
   4  13  -2   83.89   13.10
   4  13  -2   97.69   13.80
  -4 -13   2   82.49   19.00
  -4 -13   2   62.39   16.50
  -4 -13   2  184.68   44.00
   3  13  -2   11.00    6.40
   3  13  -2   11.40   10.90
   3  13  -2    0.90    7.10
  -3 -13   2   19.70   16.30
  -3 -13   2  -10.60   30.50
  -3 -13   2    2.60   11.80
   2  13  -2   74.79   10.40
   2  13  -2   45.20   11.10
   2  13  -2   81.49   12.40
   2  13  -2   82.99   14.80
  -2 -13   2   38.50   14.80
  -2 -13   2   59.39   13.40
  -2 -13   2   75.59   22.50
   1  13  -2   90.49   17.00
   1  13  -2   98.79   13.70
   1  13  -2   92.99   14.00
   1  13  -2   82.99   13.40
  -1 -13   2   63.49   13.70
  -1 -13   2   86.39   16.80
   0  13  -2  200.38   56.99
   0  13  -2  125.09   21.30
   0  13  -2  159.28   19.00
   0  13  -2  134.29   23.40
   0 -13   2  159.88   17.90
   0 -13   2  154.88   20.90
   0 -13   2  122.49   22.10
   0 -13   2   56.79   82.89
  -1  13  -2   36.70   30.70
  -1  13  -2   14.00   12.20
  -1  13  -2   51.29   10.80
  -1  13  -2   39.90    9.70
   1 -13   2   38.10   92.39
   1 -13   2   37.40    9.30
   1 -13   2   28.70   14.70
   1 -13   2   31.50   11.60
  -2  13  -2   84.79   56.79
  -2  13  -2   45.70   14.20
  -2  13  -2  106.49   28.00
  -2  13  -2   73.79   13.40
  -2  13  -2   54.39   10.80
  -2  13  -2   82.09   12.70
   2 -13   2   48.90   13.30
   2 -13   2   61.69   16.30
   2 -13   2   68.29   16.70
   2 -13   2   46.00   12.00
   2 -13   2   72.89   91.59
  -3  13  -2   15.30   10.10
  -3  13  -2  -26.60   31.10
  -3  13  -2   29.60    8.00
  -3  13  -2   -8.60   13.10
   3 -13   2   17.70   12.80
   3 -13   2   12.10   14.70
   3 -13   2    7.40   11.80
   3 -13   2  -23.50   17.40
  -4  13  -2   -2.80   13.40
  -4  13  -2   -6.70   39.60
  -4  13  -2   -1.80    7.40
  -4  13  -2    5.60   12.30
   4 -13   2   14.60   13.90
   4 -13   2   -2.60   11.00
   4 -13   2    8.00   15.10
   4 -13   2   23.50   23.20
  -5  13  -2   99.09   49.99
  -5  13  -2   22.40    8.10
  -5  13  -2    9.60   13.70
  -5  13  -2   44.10   16.70
   5 -13   2   37.10   17.40
   5 -13   2   17.70   13.60
   5 -13   2   21.90   29.00
   5 -13   2    9.00   16.00
  -6  13  -2  218.98   39.50
  -6  13  -2  377.26   67.09
   6 -13   2  190.98   42.60
  -7  13  -2   11.80   68.59
  -7  13  -2   11.00   14.60
  -7  13  -2    0.10    8.90
   7 -13   2   -7.10   59.99
   7 -13   2  -17.10   23.90
   7 -13   2   -5.90   14.90
  -8  13  -2  -24.20   14.80
  -8  13  -2    6.40   37.60
  -8  13  -2 -155.58   75.59
  -8  13  -2   -6.60   10.40
   8 -13   2   16.00   40.60
   8 -13   2    0.60   20.60
   8 -13   2  -23.10   37.70
   7  12  -2   -1.40    8.60
   7  12  -2    0.80    9.60
   7  12  -2    8.30    4.70
   7  12  -2   -6.30    6.70
  -7 -12   2  -15.70   24.80
  -7 -12   2   -9.80   44.50
  -7 -12   2   20.80   32.30
   6  12  -2   58.49    8.90
   6  12  -2   68.79   11.80
   6  12  -2   54.59   10.10
  -6 -12   2   51.09   18.80
  -6 -12   2  182.68   43.50
  -6 -12   2   65.49   21.10
   5  12  -2    6.90    4.60
   5  12  -2   12.00    6.90
   5  12  -2   22.90    6.90
   5  12  -2   14.00    9.30
  -5 -12   2    7.20   14.20
  -5 -12   2   21.70   39.10
  -5 -12   2    9.90   14.20
   4  12  -2  385.76   40.90
   4  12  -2  395.66   41.70
   4  12  -2  386.06   40.00
   4  12  -2  414.06   40.70
   3  12  -2  125.39   15.60
   3  12  -2  134.89   14.90
   3  12  -2  109.59   18.40
   3  12  -2  127.79   15.50
  -3 -12   2  210.98   35.40
  -3 -12   2   94.29   18.40
   2  12  -2   23.80    6.70
   2  12  -2   27.00    7.50
   2  12  -2   34.50   10.50
  -2 -12   2   52.39   20.70
  -2 -12   2   20.90   11.80
   1  12  -2   10.70    6.50
   1  12  -2    3.80    8.20
   1  12  -2   19.80    6.40
   1  12  -2   29.50   37.50
   1  12  -2  -15.20   11.10
  -1 -12   2    0.10   10.10
  -1 -12   2  -30.00   54.89
  -1 -12   2   -7.60   12.40
  -1 -12   2    9.40    4.90
  -1 -12   2   -7.40   12.00
   0  12  -2    2.50    6.90
   0  12  -2  -10.50    8.10
   0  12  -2    5.20    6.80
   0  12  -2  -23.10   47.40
   0  12  -2  -25.90   13.00
   0  12  -2    1.70    6.90
   0 -12   2   -0.20    8.50
   0 -12   2   29.60    8.90
   0 -12   2  -16.30   11.70
   0 -12   2    5.20   61.29
   0 -12   2   -2.60    5.70
  -1  12  -2  380.26   37.90
  -1  12  -2  350.26   44.20
  -1  12  -2  345.97   38.10
   1 -12   2  391.76   40.20
   1 -12   2  242.88   83.09
  -2  12  -2   47.80    7.60
  -2  12  -2   44.50   12.40
  -2  12  -2   34.70    8.30
  -2  12  -2   41.00   22.90
  -2  12  -2   20.00   44.70
  -2  12  -2   39.50    8.90
   2 -12   2   19.50   15.10
   2 -12   2   27.80    9.30
   2 -12   2  -32.10   70.49
   2 -12   2   36.00    9.60
   2 -12   2   21.60   13.00
  -3  12  -2    1.30   42.30
  -3  12  -2   51.29   29.30
  -3  12  -2   23.80   11.80
  -3  12  -2   21.00   10.00
  -3  12  -2   15.70    6.90
   3 -12   2   19.80   10.40
   3 -12   2   30.30   11.10
   3 -12   2   19.90   11.90
   3 -12   2   23.70   19.00
   3 -12   2   31.80   61.49
  -4  12  -2  127.39   15.20
  -4  12  -2  101.39   17.40
   4 -12   2  124.69   21.50
   4 -12   2  144.89   27.60
   4 -12   2  114.49   22.40
   4 -12   2  107.69   18.00
  -5  12  -2   11.60   16.30
  -5  12  -2   -8.90   44.20
  -5  12  -2    4.00   11.20
   5 -12   2  -16.20   27.80
   5 -12   2  -15.80   11.20
   5 -12   2    0.20   14.80
  -6  12  -2   -5.00   54.29
  -6  12  -2    8.50   11.70
  -6  12  -2   21.60    7.50
   6 -12   2   17.40   16.30
   6 -12   2   37.60   18.80
   6 -12   2   51.49   32.60
   6 -12   2   16.50   12.80
  -7  12  -2   10.00   29.50
  -7  12  -2   19.70    8.00
  -7  12  -2  -37.50   61.79
  -7  12  -2    3.80   14.10
   7 -12   2   15.70   20.00
   7 -12   2    5.00   13.00
   7 -12   2   14.70   24.20
   7 -12   2   21.20   35.10
  -8  12  -2   -8.70   36.60
  -8  12  -2    9.90    9.30
  -8  12  -2    0.70   13.90
  -8  12  -2  -21.90   73.79
   8 -12   2   18.70   18.10
   8 -12   2   40.10   26.60
   8 -12   2   14.70   34.80
   8  11  -2   99.69   12.60
   8  11  -2   90.09   14.40
   8  11  -2   68.79   10.70
   8  11  -2   95.89   16.20
  -8 -11   2  210.48   45.20
   7  11  -2   48.70    9.40
   7  11  -2   59.29    9.60
   7  11  -2   33.70    9.90
  -7 -11   2   47.10   30.70
  -7 -11   2   69.39   22.50
   6  11  -2  136.29   15.60
   6  11  -2  123.39   14.50
   6  11  -2  142.69   15.80
   6  11  -2   91.79   12.50
  -6 -11   2  205.28   40.40
  -6 -11   2   85.79   21.50
  -6 -11   2   65.59   20.60
   5  11  -2   52.49    7.90
   5  11  -2   35.50    5.80
  -5 -11   2   24.90   15.30
  -5 -11   2   27.20   13.20
   4  11  -2   93.89   11.50
   4  11  -2   95.29   13.50
   4  11  -2  110.29   14.40
   4  11  -2  110.59   12.40
  -4 -11   2   68.79   14.60
  -4 -11   2   87.09   16.20
  -4 -11   2  159.18   36.00
   3  11  -2  399.06   39.20
   3  11  -2  418.46   38.80
   3  11  -2  376.06   39.50
   3  11  -2  361.76   40.00
  -3 -11   2  324.87   41.50
  -3 -11   2  436.46   55.99
   2  11  -2  290.47   34.60
   2  11  -2  352.46   52.79
   2  11  -2  309.87   36.70
   2  11  -2  362.46   33.20
  -2 -11   2  323.97   34.50
  -2 -11   2  331.27   43.30
  -2 -11   2  300.47   36.80
   1  11  -2   19.00    7.00
   1  11  -2   19.90    5.60
   1  11  -2   16.80    9.30
   1  11  -2   18.00   35.20
   1  11  -2   12.20    5.80
  -1 -11   2   13.20   45.70
  -1 -11   2   10.80    7.10
  -1 -11   2    9.20    9.40
  -1 -11   2   11.90    5.30
  -1 -11   2   10.40    4.20
  -1 -11   2    0.70   11.30
   0  11  -2  448.46   54.59
   0  11  -2  522.85   53.19
   0  11  -2  499.95   52.39
   0 -11   2  553.04   51.99
   0 -11   2  461.05   53.49
   0 -11   2  598.84   53.19
  -1  11  -2   -6.50   40.80
  -1  11  -2   -3.00   13.70
  -1  11  -2    5.00    6.20
  -1  11  -2   -2.40    8.40
  -1  11  -2    3.70    7.10
  -1  11  -2   13.00    6.20
   1 -11   2    1.20    9.10
   1 -11   2   -4.80    7.00
   1 -11   2  -20.50   54.69
  -2  11  -2   86.99   20.60
  -2  11  -2   61.89   10.00
  -2  11  -2   95.09   11.20
  -2  11  -2   62.99   12.90
   2 -11   2   72.29   13.80
   2 -11   2    9.00   53.59
   2 -11   2   70.39   12.00
   2 -11   2   76.99   13.50
  -3  11  -2   32.10    6.20
  -3  11  -2   36.20   10.50
  -3  11  -2  -43.50   34.80
  -3  11  -2   56.39   25.90
  -3  11  -2   14.90   10.00
   3 -11   2   11.80    9.90
   3 -11   2   19.30    9.40
   3 -11   2    5.10    8.70
   3 -11   2   39.20   46.40
  -4  11  -2   -5.40   34.40
  -4  11  -2   45.80   34.80
  -4  11  -2    1.00    9.50
  -4  11  -2    2.30    5.30
  -4  11  -2    0.60   12.60
   4 -11   2   -1.40   10.70
   4 -11   2    5.40   10.40
   4 -11   2   -9.30   22.10
   4 -11   2   -9.50    8.60
   4 -11   2   32.50   38.60
  -5  11  -2    2.10   42.50
  -5  11  -2   25.40   10.20
  -5  11  -2   37.30   17.10
  -5  11  -2   22.90    6.00
   5 -11   2   17.10   11.50
   5 -11   2   12.90   13.40
   5 -11   2   15.80   10.00
   5 -11   2  -11.20   25.50
  -6  11  -2  275.97   33.30
   6 -11   2  286.77   35.20
   6 -11   2  313.37   39.20
   6 -11   2  304.47   33.90
  -7  11  -2   -8.10   28.50
  -7  11  -2    5.40    6.50
  -7  11  -2    5.90   10.90
  -7  11  -2  -61.99   56.99
   7 -11   2   -3.00   12.50
   7 -11   2    9.30   15.50
   7 -11   2   28.00   32.30
   7 -11   2    6.80   21.50
  -8  11  -2 -125.29   63.69
  -8  11  -2    9.00    8.00
   8 -11   2   10.40   29.50
   8 -11   2    2.20   21.70
   8 -11   2  -47.70   45.10
   8 -11   2    4.20   16.40
  -9  11  -2  -68.49   73.19
  -9  11  -2  -16.60   14.70
  -9  11  -2    8.50   10.30
  -9  11  -2   -8.30   52.19
   9 -11   2  -14.60   29.30
   9 -11   2    4.00   20.40
   9  10  -2   -3.60    8.60
   9  10  -2    9.20    5.50
   9  10  -2   -5.60    5.30
   9  10  -2   -3.60    7.40
  -9 -10   2   29.90   41.50
  -9 -10   2  -29.80   31.10
   8  10  -2   13.20    8.00
   8  10  -2    5.40    4.80
   8  10  -2    4.10   10.40
   8  10  -2   -0.30    4.30
  -8 -10   2    2.60   31.70
  -8 -10   2    6.00   22.70
   7  10  -2   10.40    4.80
   7  10  -2    9.00    3.60
   7  10  -2    1.20    6.50
  -7 -10   2  -23.70   17.70
  -7 -10   2   45.00   28.40
  -7 -10   2   18.50   28.20
   6  10  -2   18.70    4.20
   6  10  -2   37.00    6.30
   6  10  -2   22.60    7.10
   6  10  -2   33.00    7.40
  -6 -10   2   30.80   16.20
  -6 -10   2   19.40   16.90
  -6 -10   2    0.30   25.40
   5  10  -2    2.90    5.10
   5  10  -2    3.40    3.50
   5  10  -2    2.50    6.00
   5  10  -2    9.00    5.30
  -5 -10   2   14.30   26.70
  -5 -10   2    8.90   10.80
   4  10  -2    7.80    4.60
   4  10  -2    3.40    5.60
   4  10  -2   10.70    5.00
   4  10  -2    5.00    3.50
  -4 -10   2   34.10   28.30
  -4 -10   2    0.00    8.50
   3  10  -2  858.01   87.09
   3  10  -2 1010.60   87.09
   3  10  -2  920.01   86.79
   3  10  -2  942.51   91.79
   3  10  -2  882.41   87.29
  -3 -10   2  749.03   87.49
  -3 -10   2  763.92   95.79
  -3 -10   2  839.82   88.79
   2  10  -2   34.10    6.00
   2  10  -2   26.40    6.60
   2  10  -2   28.10    5.60
   2  10  -2   30.70    7.70
  -2 -10   2   14.70   19.40
  -2 -10   2   25.80   33.60
  -2 -10   2   44.30   10.60
  -2 -10   2   38.60    7.80
   1  10  -2   34.10    5.90
   1  10  -2   34.90    6.60
   1  10  -2   48.00   30.20
   1  10  -2   16.90    8.40
   1  10  -2   35.10    6.80
   1  10  -2   20.20    6.00
  -1 -10   2   82.79   27.00
  -1 -10   2   39.90    7.50
  -1 -10   2   26.00   36.60
  -1 -10   2   13.00    9.40
  -1 -10   2   15.70   12.10
   0  10  -2   -1.80    4.60
   0  10  -2   -1.40    4.70
   0  10  -2  -19.80   31.80
   0  10  -2   -7.10    5.10
   0  10  -2   -1.20    9.50
   0  10  -2    1.50    5.60
   0 -10   2   -5.80    7.70
   0 -10   2   -1.40    4.00
   0 -10   2    0.70    5.80
   0 -10   2  -12.70   42.10
   0 -10   2   -8.10    6.30
  -1  10  -2  107.69   13.60
  -1  10  -2  109.59   14.20
  -1  10  -2   86.09   18.40
  -1  10  -2  123.19   14.20
  -1  10  -2  186.28   39.80
  -1  10  -2  131.49   16.00
   1 -10   2   98.39   13.40
   1 -10   2   54.89   57.19
   1 -10   2  112.39   13.70
   1 -10   2   95.79   15.90
  -2  10  -2   61.59    9.60
  -2  10  -2   77.89   12.10
  -2  10  -2   88.19   12.40
  -2  10  -2   63.79    9.70
  -2  10  -2  124.09   36.30
  -2  10  -2   62.39   18.50
   2 -10   2   63.79   10.50
   2 -10   2    0.80   44.20
   2 -10   2   58.99   10.00
   2 -10   2   61.59   10.80
  -3  10  -2   73.59   21.70
  -3  10  -2   77.89   33.10
  -3  10  -2   50.39   11.10
  -3  10  -2   15.80    9.00
  -3  10  -2   33.10    6.00
   3 -10   2   27.60    7.30
   3 -10   2   37.70    9.40
   3 -10   2  -18.90   34.90
   3 -10   2   26.80    8.80
  -4  10  -2  155.18   38.20
  -4  10  -2  160.28   21.20
  -4  10  -2  262.47   48.60
  -4  10  -2  160.68   18.50
   4 -10   2  182.38   21.00
   4 -10   2  285.17   47.30
   4 -10   2  173.48   22.60
   4 -10   2  162.78   19.90
  -5  10  -2   13.40   29.40
  -5  10  -2   34.30   38.60
  -5  10  -2   32.40   17.80
  -5  10  -2   16.90    7.60
  -5  10  -2   20.70    5.10
   5 -10   2   19.50   23.20
   5 -10   2   19.70    9.30
   5 -10   2   -1.30    8.40
   5 -10   2    2.90   14.00
  -6  10  -2   54.09    8.10
  -6  10  -2   58.19   11.40
  -6  10  -2    3.90   45.30
   6 -10   2   64.09   29.60
   6 -10   2   82.79   18.40
   6 -10   2   58.19   12.10
   6 -10   2   58.79   12.30
  -7  10  -2    3.90   46.00
  -7  10  -2  -22.50   29.60
  -7  10  -2    1.60    5.90
  -7  10  -2    5.00    8.40
   7 -10   2   13.40   27.40
   7 -10   2   -0.70   11.70
   7 -10   2    3.40   11.90
   7 -10   2  -19.90   18.30
  -8  10  -2   69.29   14.60
  -8  10  -2   70.29   10.40
  -8  10  -2  179.18   43.30
  -8  10  -2   65.49   59.79
   8 -10   2   43.10   32.20
   8 -10   2   38.40   24.70
   8 -10   2   79.89   17.30
   8 -10   2   46.00   17.00
  -9  10  -2   35.50   52.19
  -9  10  -2    4.50   62.19
  -9  10  -2    2.40   14.20
  -9  10  -2   12.00    9.50
   9 -10   2   -8.10   24.50
 -10  10  -2    1.60   13.20
 -10  10  -2    0.00   18.70
 -10  10  -2  -30.90   69.09
 -10  10  -2  -10.60   67.29
  10 -10   2   14.70   24.70
  10 -10   2    2.00   23.20
   9   9  -2   -5.10    6.90
   9   9  -2    2.10    8.20
   9   9  -2   -3.60    5.20
   9   9  -2   -5.40    5.30
  -9  -9   2   -2.90   26.80
  -9  -9   2   18.70   36.40
   8   9  -2   -7.20    7.20
   8   9  -2   10.40    6.70
   8   9  -2   -0.80    4.60
  -8  -9   2  -12.10   28.00
  -8  -9   2   13.60   40.10
  -8  -9   2   19.20   21.70
   7   9  -2    2.50    4.80
   7   9  -2   17.90    6.80
   7   9  -2    6.70    6.10
  -7  -9   2   22.40   26.70
  -7  -9   2   13.40   17.10
  -7  -9   2    9.40   25.90
   6   9  -2  132.19   15.00
   6   9  -2  140.69   16.10
   6   9  -2  138.79   16.10
  -6  -9   2   65.79   28.10
  -6  -9   2  173.78   27.30
  -6  -9   2  147.19   24.50
   5   9  -2   22.80    5.60
   5   9  -2   18.30    5.30
  -5  -9   2   15.20   21.70
  -5  -9   2   22.70   12.80
  -5  -9   2   16.70    9.90
   4   9  -2  107.19   11.70
   4   9  -2  107.69   12.10
   4   9  -2  101.19   11.40
  -4  -9   2   73.79   14.40
  -4  -9   2   66.69   14.80
  -4  -9   2   42.60   28.50
   3   9  -2   53.09   17.50
   3   9  -2   75.99    9.30
   3   9  -2   55.09    9.90
   3   9  -2   63.89    9.50
  -3  -9   2   90.49   13.50
  -3  -9   2   76.59   11.20
   2   9  -2   67.39   21.30
   2   9  -2   51.09    7.20
   2   9  -2   43.30    7.20
   2   9  -2   61.29    7.30
   2   9  -2   43.80    7.90
  -2  -9   2   43.40    7.70
  -2  -9   2   12.80   26.60
  -2  -9   2   41.20   19.70
  -2  -9   2   46.10   10.20
   1   9  -2  522.45   60.79
   1   9  -2  575.14   60.49
   1   9  -2  654.13   60.29
   1   9  -2  699.53   59.99
  -1  -9   2  609.74   61.29
  -1  -9   2  561.74   60.49
  -1  -9   2  597.44   59.89
   0   9  -2  112.19   14.20
   0   9  -2  112.69   13.00
   0   9  -2   96.09   16.00
   0   9  -2  137.59   12.80
   0   9  -2  113.59   12.90
   0  -9   2  103.89   14.70
   0  -9   2   82.69   13.00
   0  -9   2  112.09   12.30
   0  -9   2   26.70   37.20
  -1   9  -2  320.97   33.00
  -1   9  -2  375.46   33.60
  -1   9  -2  319.87   33.70
   1  -9   2  288.87   33.20
   1  -9   2  306.97   33.90
   1  -9   2  324.67   33.30
  -2   9  -2   42.90    6.90
  -2   9  -2   44.70    7.70
  -2   9  -2   68.29   31.50
  -2   9  -2   61.19   11.10
  -2   9  -2   13.80   13.60
   2  -9   2   26.50    7.00
   2  -9   2   46.60   35.80
   2  -9   2   39.40    7.70
   2  -9   2   38.20    7.80
  -3   9  -2   26.50   20.90
  -3   9  -2    1.90   25.70
  -3   9  -2    1.00    9.60
  -3   9  -2   10.80    6.30
  -3   9  -2    7.10    2.40
  -3   9  -2    1.30    3.80
   3  -9   2   14.50    7.10
   3  -9   2    2.20    5.30
   3  -9   2    7.70    6.50
   3  -9   2    2.70   27.30
  -4   9  -2  277.57   26.30
  -4   9  -2  182.78   40.70
  -4   9  -2  218.98   27.40
   4  -9   2  346.27   41.80
   4  -9   2  262.47   29.60
   4  -9   2  260.67   27.70
   4  -9   2  253.67   27.60
  -5   9  -2   -7.40   14.40
  -5   9  -2   44.70   34.10
  -5   9  -2   11.80    4.30
  -5   9  -2    7.70    7.30
   5  -9   2   22.40    7.50
   5  -9   2    2.20   12.10
   5  -9   2   19.50    7.30
   5  -9   2   -0.70   17.60
  -6   9  -2   -5.30    4.40
  -6   9  -2   -9.60   22.90
  -6   9  -2   10.40   25.20
  -6   9  -2   -2.40    6.50
  -6   9  -2  -26.80   36.90
   6  -9   2    4.30    8.10
   6  -9   2   -5.00   15.90
   6  -9   2   -0.50   16.00
   6  -9   2   -3.50    8.40
  -7   9  -2   45.20   27.60
  -7   9  -2   22.80    5.90
  -7   9  -2   15.00    9.50
  -7   9  -2   47.30   45.30
   7  -9   2   18.80   10.10
   7  -9   2  -11.30   22.50
   7  -9   2   16.90   11.10
   7  -9   2   30.60   21.30
  -8   9  -2  324.17   61.69
  -8   9  -2  213.58   26.20
  -8   9  -2  239.18   29.60
   8  -9   2  241.88   44.70
   8  -9   2  240.58   38.50
   8  -9   2  280.27   31.10
   8  -9   2  260.57   31.30
  -9   9  -2    1.00    8.80
  -9   9  -2  -10.80   13.20
  -9   9  -2    1.70   91.79
   9  -9   2   -6.60   17.10
   9  -9   2   -8.20   22.40
   9  -9   2  -13.40   29.40
 -10   9  -2   46.50   59.79
 -10   9  -2   54.49   18.80
 -10   9  -2  200.58   72.09
 -10   9  -2   50.69   14.30
  10  -9   2   73.59   23.20
  10  -9   2   29.40   22.60
  10   8  -2    7.20    7.10
  10   8  -2   11.80    5.90
  10   8  -2    1.40    6.60
  10   8  -2    6.20    8.40
 -10  -8   2  -19.10   34.30
 -10  -8   2   68.89   38.60
 -10  -8   2   19.00   32.00
   9   8  -2    4.70    7.40
   9   8  -2   -1.80    6.00
   9   8  -2    1.90    4.80
  -9  -8   2  -33.80   24.50
  -9  -8   2   22.90   28.60
  -9  -8   2   20.40   28.70
   8   8  -2   14.10    6.90
   8   8  -2   11.70    4.50
   8   8  -2   -0.70    5.90
  -8  -8   2  -21.90   25.20
  -8  -8   2   24.20   24.50
  -8  -8   2   30.60   19.60
  -8  -8   2  -13.90   34.20
   7   8  -2    9.80    4.20
   7   8  -2    9.10    6.10
   7   8  -2    3.00    5.50
  -7  -8   2   -5.80   21.60
  -7  -8   2  -19.60   14.20
  -7  -8   2    0.50   19.80
  -7  -8   2   18.90   24.40
   6   8  -2  224.58   23.10
   6   8  -2  213.98   23.30
   6   8  -2  242.58   22.70
  -6  -8   2  167.28   28.70
  -6  -8   2  181.28   30.70
  -6  -8   2  231.68   30.90
   5   8  -2  278.37   27.00
   5   8  -2  260.97   26.70
   5   8  -2  282.87   26.80
  -5  -8   2  224.38   29.20
  -5  -8   2  218.18   30.70
   4   8  -2   33.70   11.40
   4   8  -2   35.20    5.60
   4   8  -2   32.10    5.30
   4   8  -2   25.80    4.70
  -4  -8   2   11.40   17.70
  -4  -8   2    9.00   19.10
  -4  -8   2   17.30    8.60
  -4  -8   2   22.20    7.20
   3   8  -2   33.60    5.40
   3   8  -2   23.10   13.80
   3   8  -2   35.90    5.10
   3   8  -2   29.20    5.40
  -3  -8   2   47.40    8.80
  -3  -8   2   -6.30   16.90
  -3  -8   2   25.60    6.60
  -3  -8   2   22.80   20.20
   2   8  -2  290.07   31.00
   2   8  -2  313.97   30.40
   2   8  -2  340.47   31.00
  -2  -8   2  287.97   31.70
  -2  -8   2  286.47   32.00
   1   8  -2  870.41   84.09
   1   8  -2  758.72   84.49
   1   8  -2  952.30   83.99
   1   8  -2  967.20   93.39
   1   8  -2  805.12   84.09
   1   8  -2  835.72   84.39
  -1  -8   2  860.31   84.69
  -1  -8   2  821.22   83.79
  -1  -8   2  806.02   84.29
   0   8  -2  174.88   18.00
   0   8  -2  165.78   16.90
   0   8  -2  156.08   17.40
   0   8  -2  152.48   16.90
   0  -8   2  158.28   17.90
   0  -8   2  153.88   17.00
   0  -8   2  151.58   16.50
  -1   8  -2  156.28   16.10
  -1   8  -2  149.39   14.80
  -1   8  -2  125.29   14.40
  -1   8  -2  121.39   15.40
  -1   8  -2   98.59   22.90
   1  -8   2   78.39   32.60
   1  -8   2  121.19   16.80
   1  -8   2  128.59   14.60
   1  -8   2  122.59   15.20
  -2   8  -2  916.31   93.69
  -2   8  -2  818.02   96.09
  -2   8  -2 1061.49   92.89
  -2   8  -2  961.80   92.99
   2  -8   2  961.60   93.49
   2  -8   2  931.21   93.69
   2  -8   2  903.71   93.29
  -3   8  -2    1.10    9.70
  -3   8  -2    0.60    5.70
  -3   8  -2    7.50   17.70
  -3   8  -2    5.20   27.10
  -3   8  -2    5.60    3.10
   3  -8   2   -1.90    6.30
   3  -8   2   -0.90   21.30
   3  -8   2    7.90    5.30
   3  -8   2    1.60    4.30
  -4   8  -2  118.99   25.40
  -4   8  -2  103.99   12.90
  -4   8  -2  138.99   19.70
  -4   8  -2  100.79   11.70
  -4   8  -2   81.19   27.20
   4  -8   2   94.39   12.70
   4  -8   2   91.79   21.30
   4  -8   2   99.49   16.50
  -5   8  -2   -1.80   20.80
  -5   8  -2   -9.80   30.10
  -5   8  -2   23.10    6.70
  -5   8  -2   24.00   16.00
   5  -8   2   14.90   14.50
   5  -8   2   18.70    6.60
   5  -8   2   17.40   10.80
   5  -8   2   24.90    7.10
  -6   8  -2  384.26   46.60
  -6   8  -2  430.16   45.50
   6  -8   2  480.15   49.99
   6  -8   2  466.65   46.50
   6  -8   2  512.05   51.89
   6  -8   2  480.35   46.70
  -7   8  -2  247.28   26.10
  -7   8  -2  195.98   42.30
  -7   8  -2  221.08   49.70
  -7   8  -2  204.98   24.50
   7  -8   2  207.98   26.60
   7  -8   2  287.77   27.70
   7  -8   2  257.17   34.90
   7  -8   2  250.57   31.60
  -8   8  -2   -4.30    6.20
  -8   8  -2   -7.40    8.80
  -8   8  -2  -12.20   39.00
  -8   8  -2  -32.30   43.50
   8  -8   2  -13.20   10.20
   8  -8   2  -29.00   22.50
   8  -8   2    5.50   16.40
   8  -8   2    0.60   11.00
  -9   8  -2   17.70   13.40
  -9   8  -2   38.00    9.70
  -9   8  -2   44.40   49.70
   9  -8   2   50.59   19.10
   9  -8   2   49.00   15.50
   9  -8   2   71.49   16.60
   9  -8   2  -14.10   29.50
 -10   8  -2   49.60   52.59
 -10   8  -2   71.29   18.90
 -10   8  -2   41.00   14.00
 -10   8  -2  183.48   70.99
  10  -8   2   38.80   20.90
  10  -8   2   46.50   17.50
  10   7  -2   42.00    8.40
  10   7  -2   46.60    7.40
  10   7  -2   43.70    9.80
 -10  -7   2  109.19   34.40
 -10  -7   2   41.70   31.90
 -10  -7   2   67.39   30.00
   9   7  -2    5.20    6.20
   9   7  -2    4.60    4.80
   9   7  -2   11.00    7.40
  -9  -7   2    3.50   24.40
  -9  -7   2   13.40   25.10
  -9  -7   2   27.30   23.70
   8   7  -2   54.69    9.90
   8   7  -2   63.39    8.60
   8   7  -2   60.39   10.00
  -8  -7   2   40.30   22.20
  -8  -7   2   77.19   20.50
  -8  -7   2   54.99   30.50
  -8  -7   2   35.20   23.40
   7   7  -2   -3.40    5.20
   7   7  -2    2.20    5.00
   7   7  -2    1.60    3.90
   7   7  -2   -1.40    5.20
  -7  -7   2    1.40   13.40
  -7  -7   2   -2.60   21.20
  -7  -7   2  -16.70   18.70
  -7  -7   2    9.50   16.30
   6   7  -2   35.50    6.30
   6   7  -2   55.99    7.90
   6   7  -2   38.20    5.90
   6   7  -2   42.10    7.00
  -6  -7   2   30.90   17.30
  -6  -7   2   19.00   15.50
  -6  -7   2   46.10   13.00
   5   7  -2  197.08   21.20
   5   7  -2  228.18   20.80
   5   7  -2  205.88   21.80
   5   7  -2  195.28   24.70
   5   7  -2  211.28   21.30
  -5  -7   2  182.78   29.20
  -5  -7   2  174.48   24.10
   4   7  -2  869.21   88.19
   4   7  -2  949.11   87.09
   4   7  -2  889.41   87.59
   4   7  -2  856.31   87.49
   4   7  -2  935.71   89.29
  -4  -7   2  752.72   88.49
  -4  -7   2  919.51   87.99
   3   7  -2   99.09   10.30
   3   7  -2   87.39   10.40
   3   7  -2   97.19   16.10
   3   7  -2  102.79   10.20
  -3  -7   2   97.99   13.90
  -3  -7   2   74.09   11.10
  -3  -7   2   48.10   18.60
   2   7  -2 2045.80  187.18
   2   7  -2 1841.62  187.38
   2   7  -2 1730.63  187.38
   2   7  -2 1907.01  187.28
  -2  -7   2 2011.00  187.58
  -2  -7   2 1856.41  187.88
   1   7  -2   91.69   23.50
   1   7  -2   91.09   10.70
   1   7  -2   89.49    9.80
  -1  -7   2   66.19   23.00
  -1  -7   2  101.09   14.50
  -1  -7   2   87.99   10.00
  -1  -7   2   76.49    8.90
  -1  -7   2   79.69   11.20
   0   7  -2  280.77   39.30
   0   7  -2  172.88   19.20
   0   7  -2  164.18   20.60
   0   7  -2  220.38   19.70
   0  -7   2  175.78   19.30
   0  -7   2  188.38   19.30
   0  -7   2  181.08   19.60
  -1   7  -2  284.37   28.70
  -1   7  -2  269.37   28.00
  -1   7  -2  231.88   30.80
  -1   7  -2  285.27   29.70
  -1   7  -2  276.37   28.20
   1  -7   2  293.67   28.30
   1  -7   2  288.17   28.50
   1  -7   2  279.67   28.40
  -2   7  -2   15.30   11.60
  -2   7  -2    3.30    2.70
  -2   7  -2    3.20    4.70
  -2   7  -2   -7.30    7.50
  -2   7  -2    3.90   20.80
  -2   7  -2    8.20    2.40
   2  -7   2    2.80    4.20
   2  -7   2  -17.00   20.30
   2  -7   2    2.50    3.50
   2  -7   2    3.60    4.70
  -3   7  -2  361.26   35.60
  -3   7  -2  316.97   36.60
   3  -7   2  352.56   36.70
   3  -7   2  374.16   36.10
   3  -7   2  375.06   37.30
  -4   7  -2 1216.18  109.69
  -4   7  -2 1051.29  110.09
   4  -7   2 1115.89  112.99
   4  -7   2 1067.99  111.19
   4  -7   2 1105.49  110.19
   4  -7   2 1101.09  109.99
  -5   7  -2    5.20   25.30
  -5   7  -2   25.00   18.00
  -5   7  -2    7.70    5.80
  -5   7  -2   10.40   17.30
   5  -7   2   -0.80   11.10
   5  -7   2   16.80   11.30
   5  -7   2   21.00    5.30
   5  -7   2   13.70    5.30
  -6   7  -2    2.90    6.40
  -6   7  -2  -11.00   17.30
  -6   7  -2   -1.70   29.20
  -6   7  -2   24.70   22.90
  -6   7  -2   -0.40    3.70
   6  -7   2    7.80    6.10
   6  -7   2   -1.10    9.90
   6  -7   2    8.00   15.50
  -7   7  -2   -3.40   26.50
  -7   7  -2    8.40   19.00
  -7   7  -2   15.50    5.10
  -7   7  -2  -11.60   33.10
  -7   7  -2   10.80   12.60
   7  -7   2    5.80    8.80
   7  -7   2    7.20   15.00
   7  -7   2    1.00   11.10
   7  -7   2  -12.90   18.40
  -8   7  -2   20.90   36.30
  -8   7  -2   24.60   20.40
  -8   7  -2   18.30   10.70
  -8   7  -2   10.20    6.50
  -8   7  -2  -35.50   36.40
   8  -7   2    8.00    9.30
   8  -7   2   10.90   14.10
   8  -7   2   20.70   14.30
   8  -7   2   10.50   11.20
   8  -7   2  -32.50   20.70
  -9   7  -2   22.00   14.60
  -9   7  -2   67.79   53.49
  -9   7  -2   20.10    9.90
  -9   7  -2   52.99   38.00
   9  -7   2   34.40   12.70
   9  -7   2   -5.50   22.70
   9  -7   2   41.60   15.00
   9  -7   2   46.30   15.10
 -10   7  -2  173.88   73.19
 -10   7  -2   77.49   19.80
 -10   7  -2   57.19   47.60
 -10   7  -2   69.49   15.50
  10  -7   2   94.79   18.90
  10  -7   2   52.29   19.60
 -11   7  -2   24.70   22.10
 -11   7  -2   28.90   49.40
 -11   7  -2   57.49   86.99
 -11   7  -2   26.60   19.50
  11  -7   2   11.70   15.70
  11  -7   2  -12.20   19.70
  11   6  -2   -3.10    6.70
  11   6  -2    2.50    7.20
  11   6  -2    0.90    8.90
 -11  -6   2  -40.50   32.60
 -11  -6   2   14.20   33.60
 -11  -6   2   20.70   39.10
  10   6  -2   13.60    9.40
  10   6  -2   21.10    8.70
  10   6  -2   33.90    6.40
 -10  -6   2   26.00   26.80
 -10  -6   2   32.00   26.20
 -10  -6   2   -0.10   30.10
   9   6  -2   10.70    5.90
   9   6  -2   21.70    9.10
   9   6  -2   34.80    7.80
   9   6  -2   28.80    5.60
  -9  -6   2   -4.50   23.00
  -9  -6   2   20.90   22.40
  -9  -6   2   43.80   25.00
  -9  -6   2    3.40   41.40
   8   6  -2   16.10    5.80
   8   6  -2   27.40    7.70
   8   6  -2   26.80    4.80
   8   6  -2   12.90    6.70
  -8  -6   2   13.90   17.70
  -8  -6   2   21.60   19.30
  -8  -6   2   18.60   20.10
  -8  -6   2    4.70   23.90
   7   6  -2    4.40    5.30
   7   6  -2    0.80    5.10
   7   6  -2    5.70    5.40
   7   6  -2   -0.40    3.10
  -7  -6   2  -21.10   15.40
  -7  -6   2   -7.60   18.60
  -7  -6   2    1.60   13.80
  -7  -6   2    7.30   16.00
   6   6  -2  291.97   29.60
   6   6  -2  248.68   26.30
   6   6  -2  265.67   26.00
   6   6  -2  240.38   26.40
   6   6  -2  241.08   26.10
  -6  -6   2  173.18   32.80
  -6  -6   2  266.87   32.50
  -6  -6   2  302.47   30.20
   5   6  -2  326.27   34.60
   5   6  -2  322.87   34.50
   5   6  -2  361.76   34.70
  -5  -6   2  373.76   36.60
  -5  -6   2  377.36   37.10
  -5  -6   2  294.87   39.10
   4   6  -2  306.07   30.40
   4   6  -2  244.88   27.60
   4   6  -2  295.87   27.40
   4   6  -2  266.97   27.80
   4   6  -2  281.87   27.70
  -4  -6   2  292.87   30.60
  -4  -6   2  240.18   28.50
   3   6  -2  761.72   75.89
   3   6  -2  756.32   73.49
   3   6  -2  735.13   73.49
   3   6  -2  760.62   73.49
  -3  -6   2  699.83   73.69
  -3  -6   2  738.13   74.39
   2   6  -2 2392.56  211.38
   2   6  -2 1953.20  211.48
   2   6  -2 2022.50  211.48
   2   6  -2 1990.70  211.38
  -2  -6   2 2356.06  211.58
  -2  -6   2 2153.88  211.88
   1   6  -2  206.68   19.20
   1   6  -2  173.58   30.50
   1   6  -2  197.18   18.60
   1   6  -2  156.68   18.30
   1   6  -2  157.28   18.10
  -1  -6   2  171.88   18.90
  -1  -6   2  176.68   17.80
  -1  -6   2  142.99   28.80
  -1  -6   2  142.19   21.20
  -1  -6   2  210.28   18.30
   0   6  -2 1954.20  207.78
   0   6  -2 2185.08  207.88
   0   6  -2 2189.98  208.08
   0   6  -2 2059.29  208.28
   0   6  -2 2030.50  208.28
   0  -6   2 2138.79  207.88
   0  -6   2 2147.59  207.88
   0  -6   2 2162.38  207.98
  -1   6  -2  436.56   41.20
  -1   6  -2  425.86   40.70
  -1   6  -2  373.86   42.30
  -1   6  -2  420.26   42.60
  -1   6  -2  369.56   40.70
   1  -6   2  410.76   41.10
   1  -6   2  449.56   41.00
   1  -6   2  389.66   40.80
  -2   6  -2 1174.38  121.19
  -2   6  -2 1160.48  122.69
  -2   6  -2 1331.67  121.59
  -2   6  -2 1110.39  120.99
   2  -6   2 1375.06  121.49
   2  -6   2 1222.48  121.89
  -3   6  -2  356.06   39.10
  -3   6  -2  266.87   30.50
  -3   6  -2  297.37   34.70
  -3   6  -2  299.97   31.30
   3  -6   2  337.97   32.50
   3  -6   2  310.17   31.40
   3  -6   2  310.47   31.00
  -4   6  -2  210.98   31.90
  -4   6  -2  213.88   23.70
  -4   6  -2  246.58   24.50
  -4   6  -2  268.97   41.30
  -4   6  -2  252.67   30.00
   4  -6   2  235.58   28.40
   4  -6   2  253.87   24.80
   4  -6   2  256.37   27.50
   4  -6   2  220.88   24.40
  -5   6  -2  209.58   23.10
  -5   6  -2  233.08   31.90
  -5   6  -2  236.38   22.40
  -5   6  -2  179.18   30.50
   5  -6   2  207.58   26.10
   5  -6   2  224.98   23.50
   5  -6   2  225.68   28.50
   5  -6   2  224.08   23.00
  -6   6  -2  180.78   28.80
  -6   6  -2  192.28   20.20
  -6   6  -2  187.48   31.60
  -6   6  -2  173.88   18.60
  -6   6  -2  170.08   33.10
   6  -6   2  185.68   19.50
   6  -6   2  198.48   20.40
   6  -6   2  148.59   22.00
   6  -6   2  138.99   27.80
  -7   6  -2  211.08   20.40
  -7   6  -2  271.57   44.10
  -7   6  -2  158.18   36.80
  -7   6  -2  180.18   22.50
   7  -6   2  171.28   22.70
   7  -6   2  167.18   28.80
  -8   6  -2   33.20   13.90
  -8   6  -2   16.70    6.70
  -8   6  -2  -22.10   33.60
  -8   6  -2   16.20   15.80
  -8   6  -2    2.80   10.40
  -8   6  -2   10.70   39.50
   8  -6   2   13.20   12.50
   8  -6   2    8.00    8.60
   8  -6   2  -11.60   19.40
   8  -6   2   32.50   12.40
  -9   6  -2  293.27   34.00
  -9   6  -2  316.97   50.49
  -9   6  -2  256.97   39.30
  -9   6  -2  276.47   30.70
   9  -6   2  261.97   31.80
   9  -6   2  283.37   33.60
   9  -6   2  247.58   33.40
 -10   6  -2   -8.20   17.10
 -10   6  -2  -54.49   64.49
 -10   6  -2   32.00   38.30
 -10   6  -2   14.70   13.70
  10  -6   2  -11.30   15.30
  10  -6   2  -34.50   18.50
  10  -6   2   15.80   14.10
 -11   6  -2  158.78   25.20
 -11   6  -2  191.38   46.40
 -11   6  -2  186.98   27.70
 -11   6  -2  222.98   92.09
  11  -6   2  108.59   21.50
  11   5  -2   15.30    6.90
  11   5  -2   33.30    8.30
 -11  -5   2   28.50   29.80
 -11  -5   2   22.10   31.10
 -11  -5   2  -24.50   33.90
  10   5  -2   -3.40   10.30
  10   5  -2   -0.20    5.70
  10   5  -2    0.80    7.60
  10   5  -2   -6.00    5.50
 -10  -5   2  -13.00   36.70
 -10  -5   2   28.20   24.60
 -10  -5   2    9.60   26.00
   9   5  -2    1.30    5.30
   9   5  -2   -3.60    6.60
   9   5  -2   -1.10    8.50
   9   5  -2   -0.70    4.20
   9   5  -2    3.60    5.90
  -9  -5   2  -22.70   28.20
  -9  -5   2    7.40   22.70
  -9  -5   2  -15.40   16.40
  -9  -5   2  -23.00   19.20
   8   5  -2  118.09   15.50
   8   5  -2  130.29   15.90
   8   5  -2  123.69   12.70
   8   5  -2  100.59   14.80
   8   5  -2  101.79   13.60
  -8  -5   2  100.49   20.80
  -8  -5   2  128.89   22.70
  -8  -5   2   62.59   24.60
   7   5  -2    4.00    5.80
   7   5  -2    2.80    3.10
   7   5  -2   10.30    5.20
   7   5  -2    5.10    6.30
  -7  -5   2   -5.20   11.40
  -7  -5   2    9.70   13.10
  -7  -5   2   -2.60   15.80
  -7  -5   2   -4.80   13.80
   6   5  -2   -5.30    3.40
   6   5  -2    3.80    6.60
   6   5  -2   -1.20    3.40
   6   5  -2   -2.80    4.10
   6   5  -2    8.20    2.80
   6   5  -2    0.00    3.00
   6   5  -2    1.70    4.10
  -6  -5   2  -12.90   11.20
  -6  -5   2   13.90   10.60
  -6  -5   2   -4.50    9.30
  -6  -5   2    5.60   11.40
  -6  -5   2   -1.80   11.70
   5   5  -2  702.63   65.39
   5   5  -2  674.73   65.99
   5   5  -2  591.14   65.29
   5   5  -2  671.53   65.79
   5   5  -2  626.34   65.69
   5   5  -2  682.23   65.59
  -5  -5   2  692.73   67.09
   4   5  -2   14.10    3.20
   4   5  -2   19.10    3.00
   4   5  -2   12.70    3.10
   4   5  -2    6.70    6.40
   4   5  -2   12.90    3.40
  -4  -5   2   30.20    7.30
  -4  -5   2   16.60    5.10
  -4  -5   2   22.80    8.80
  -4  -5   2   17.10   10.30
  -4  -5   2   11.60    8.40
   3   5  -2  295.17   32.80
   3   5  -2  326.97   32.60
   3   5  -2  329.67   32.80
   3   5  -2  340.57   35.20
   3   5  -2  309.27   32.80
  -3  -5   2  372.06   33.10
  -3  -5   2  338.97   35.70
  -3  -5   2  318.77   33.70
   2   5  -2  314.87   28.10
   2   5  -2  249.97   28.10
   2   5  -2  268.67   28.10
   2   5  -2  294.77   27.90
  -2  -5   2  304.27   28.70
  -2  -5   2  268.97   31.00
  -2  -5   2  239.28   28.70
  -2  -5   2  289.37   28.20
   1   5  -2   21.20    4.10
   1   5  -2   22.20   14.30
   1   5  -2   17.10    3.20
   1   5  -2   24.10    3.60
   1   5  -2   14.30    2.90
  -1  -5   2   22.30    4.20
  -1  -5   2   20.00    2.60
  -1  -5   2   14.50    3.00
  -1  -5   2    7.80   12.30
  -1  -5   2   12.90    8.30
   0   5  -2   60.69    9.10
   0   5  -2   86.79   19.50
   0   5  -2   71.19    8.30
   0   5  -2   70.99    7.80
   0  -5   2  100.79   17.60
   0  -5   2   69.69    8.00
   0  -5   2   74.09    7.80
   0  -5   2   65.29    7.50
  -1   5  -2 1443.86  139.29
  -1   5  -2 1272.27  139.19
  -1   5  -2 1355.86  140.29
  -1   5  -2 1526.15  139.59
   1  -5   2 1603.74  139.39
   1  -5   2 1395.26  139.39
   1  -5   2 1275.37  143.09
  -2   5  -2  380.86   42.20
  -2   5  -2  306.97   35.00
  -2   5  -2  368.06   34.70
   2  -5   2  332.37   35.70
   2  -5   2  356.06   35.00
   2  -5   2  366.96   35.00
  -3   5  -2 1103.69  112.79
  -3   5  -2 1151.58  113.19
  -3   5  -2 1148.99  115.59
   3  -5   2 1228.98  112.99
   3  -5   2 1111.59  113.99
   3  -5   2 1118.19  113.09
  -4   5  -2  331.87   32.40
  -4   5  -2  353.86   33.00
  -4   5  -2  266.37   37.60
   4  -5   2  341.97   35.60
   4  -5   2  297.97   33.10
   4  -5   2  304.87   32.70
   4  -5   2  367.96   35.10
  -5   5  -2  314.77   34.30
  -5   5  -2  335.57   36.90
  -5   5  -2  322.57   39.20
   5  -5   2  348.27   38.20
   5  -5   2  359.16   36.20
   5  -5   2  361.76   34.70
   5  -5   2  360.96   36.70
  -6   5  -2  528.15   51.09
  -6   5  -2  429.46   59.89
  -6   5  -2  505.65   53.89
   6  -5   2  422.06   55.19
   6  -5   2  512.25   51.39
   6  -5   2  574.14   50.69
   6  -5   2  486.25   50.99
  -7   5  -2  150.68   17.70
  -7   5  -2   92.39   31.70
  -7   5  -2  133.09   16.10
  -7   5  -2  162.58   36.60
   7  -5   2  146.49   18.60
   7  -5   2  120.39   18.20
   7  -5   2  162.88   16.90
  -8   5  -2   20.90   35.70
  -8   5  -2   67.99   16.60
  -8   5  -2   15.80   18.60
  -8   5  -2   14.20   26.70
  -8   5  -2   38.40    8.10
  -8   5  -2   22.80   12.80
   8  -5   2   45.50    9.50
   8  -5   2  -18.30   17.80
   8  -5   2   19.20   10.50
  -9   5  -2  129.79   55.99
  -9   5  -2   62.99   34.20
  -9   5  -2   69.49   16.50
  -9   5  -2   79.39   13.00
   9  -5   2   66.79   14.10
   9  -5   2   60.59   12.30
 -10   5  -2   59.29   32.60
 -10   5  -2    8.20   16.70
 -10   5  -2   -6.80   66.19
 -10   5  -2   32.70   15.40
  10  -5   2   26.20   15.30
  10  -5   2   49.10   13.60
  10  -5   2    9.00   12.30
  10  -5   2   -2.70   18.90
 -11   5  -2   39.50   19.90
 -11   5  -2   29.10   36.70
 -11   5  -2   24.50   22.10
  11  -5   2    6.50   13.00
  11  -5   2  -15.70   15.80
  11   4  -2   44.90   10.20
  11   4  -2   68.09    9.70
  11   4  -2   49.00    8.70
  11   4  -2   38.90   13.30
 -11  -4   2   48.10   30.80
 -11  -4   2   40.00   27.10
 -11  -4   2   29.00   28.80
  10   4  -2   18.00    6.30
  10   4  -2   18.50    7.60
  10   4  -2   19.60   10.80
  10   4  -2   16.40    6.10
 -10  -4   2   42.80   22.50
 -10  -4   2    9.20   21.00
 -10  -4   2    6.60   25.70
 -10  -4   2    8.20   23.40
   9   4  -2   56.09    8.30
   9   4  -2   44.90    7.70
   9   4  -2   78.19   14.20
   9   4  -2   40.80   12.70
   9   4  -2   57.09   12.90
   9   4  -2   64.29    9.20
  -9  -4   2    5.00   18.40
  -9  -4   2   42.70   20.10
  -9  -4   2   -6.30   27.00
  -9  -4   2   44.20   22.10
  -9  -4   2   57.89   19.30
   8   4  -2   23.60    6.50
   8   4  -2   36.60    9.70
   8   4  -2   21.50    5.40
   8   4  -2   23.30    4.40
   8   4  -2   17.50    8.20
   8   4  -2   21.40    5.50
  -8  -4   2    4.50   15.00
  -8  -4   2   14.70   19.00
  -8  -4   2  -17.20   15.30
  -8  -4   2   19.40    6.80
  -8  -4   2   12.60   17.50
  -8  -4   2   12.30   14.00
   7   4  -2  433.16   43.80
   7   4  -2  418.16   43.10
   7   4  -2  430.66   43.10
   7   4  -2  391.66   42.70
   7   4  -2  456.15   43.60
  -7  -4   2  349.77   46.70
  -7  -4   2  445.56   47.10
  -7  -4   2  495.35   47.00
   6   4  -2  255.77   26.40
   6   4  -2  269.67   27.10
   6   4  -2  267.17   27.20
   6   4  -2  301.07   26.90
   6   4  -2  266.57   26.60
  -6  -4   2  313.27   30.30
  -6  -4   2  204.78   29.30
  -6  -4   2  197.48   30.30
  -6  -4   2  254.77   30.00
  -6  -4   2  207.08   30.20
  -6  -4   2  270.37   30.40
   5   4  -2  118.69   14.80
   5   4  -2  132.69   13.10
   5   4  -2  127.09   13.10
   5   4  -2  133.09   13.30
  -5  -4   2   93.59   16.30
  -5  -4   2  108.09   17.70
  -5  -4   2  108.49   16.90
  -5  -4   2  101.99   16.20
   4   4  -2   93.59    9.60
   4   4  -2   86.99    9.40
   4   4  -2   80.79   12.00
   4   4  -2   83.59    9.10
   4   4  -2   91.49    9.60
  -4  -4   2  116.89   12.70
  -4  -4   2   61.09   12.20
  -4  -4   2   88.89   11.20
  -4  -4   2   82.19   14.70
   3   4  -2 3702.23  365.96
   3   4  -2 3694.43  366.86
   3   4  -2 3489.65  365.76
   3   4  -2 3992.70  365.96
  -3  -4   2 3678.83  366.76
  -3  -4   2 3253.87  367.06
  -3  -4   2 4192.88  366.06
   2   4  -2  236.18   26.10
   2   4  -2  277.27   26.10
   2   4  -2  255.17   26.10
   2   4  -2  277.47   25.90
  -2  -4   2  251.67   27.50
  -2  -4   2  291.47   26.30
  -2  -4   2  212.28   26.80
  -2  -4   2  276.87   29.50
   1   4  -2 1367.76  128.39
   1   4  -2 1292.77  125.59
   1   4  -2 1220.28  125.59
   1   4  -2 1167.08  125.49
  -1  -4   2 1172.38  125.39
  -1  -4   2 1312.07  125.69
  -1  -4   2 1277.47  127.79
  -1  -4   2 1386.86  125.49
   0   4  -2  392.36   37.00
   0   4  -2  365.76   37.80
   0   4  -2  389.16   37.10
   0  -4   2  358.66   41.00
   0  -4   2  373.66   36.90
   0  -4   2  383.06   37.00
   0  -4   2  335.27   36.90
  -1   4  -2   12.50    2.40
  -1   4  -2   24.20    7.50
  -1   4  -2   11.30    2.50
  -1   4  -2   17.90    2.30
  -1   4  -2   13.80    2.00
  -1   4  -2    8.60    3.10
  -1   4  -2   13.90    5.20
   1  -4   2    5.90    2.00
   1  -4   2   13.50    3.30
   1  -4   2   38.10   11.80
   1  -4   2    9.70    1.80
   1  -4   2    9.20    2.50
   1  -4   2   13.50    5.10
  -2   4  -2   54.79    9.60
  -2   4  -2   53.09    6.10
  -2   4  -2   51.19    5.50
  -2   4  -2   40.90    7.70
   2  -4   2   58.99    6.10
   2  -4   2   46.90    6.00
   2  -4   2   34.80   11.20
   2  -4   2   37.60    8.00
  -3   4  -2   20.50    3.90
  -3   4  -2   47.70   12.10
  -3   4  -2   20.50    6.60
  -3   4  -2   22.10    9.90
  -3   4  -2    4.00    9.50
  -3   4  -2   21.70    3.50
   3  -4   2   13.50    6.20
   3  -4   2   13.40    7.50
   3  -4   2   34.10    4.80
   3  -4   2   23.70    3.90
  -4   4  -2  982.50   90.89
  -4   4  -2  759.12   92.29
  -4   4  -2  933.91   90.49
  -4   4  -2  974.00   92.99
   4  -4   2  888.21   90.79
   4  -4   2 1012.90   90.69
   4  -4   2  838.02   92.29
   4  -4   2  932.31   91.59
  -5   4  -2  242.58   31.30
  -5   4  -2  254.17   28.50
  -5   4  -2  299.17   28.00
   5  -4   2  284.17   28.60
   5  -4   2  293.97   28.20
   5  -4   2  309.57   29.10
   5  -4   2  222.38   32.60
  -6   4  -2  327.57   34.00
  -6   4  -2  337.67   34.90
  -6   4  -2  337.17   36.60
  -6   4  -2  298.57   45.50
  -6   4  -2  319.07   34.30
   6  -4   2  327.07   34.50
   6  -4   2  384.56   34.30
   6  -4   2  331.87   34.60
  -7   4  -2   -1.50    8.30
  -7   4  -2   -6.30    6.80
  -7   4  -2   -1.50   12.30
  -7   4  -2    9.70    8.90
  -7   4  -2  -46.40   27.30
  -7   4  -2   15.50   21.00
  -7   4  -2    8.70    5.60
   7  -4   2    7.70    6.00
   7  -4   2   15.20    7.30
   7  -4   2  -27.90   13.60
  -8   4  -2   -3.60   10.10
  -8   4  -2   -2.20   24.90
  -8   4  -2    5.90    7.90
  -8   4  -2  -51.89   38.50
  -8   4  -2   19.20   15.80
   8  -4   2    4.70    7.30
   8  -4   2   26.20   10.90
   8  -4   2   -0.80    9.10
  -9   4  -2  120.49   17.10
  -9   4  -2   96.79   31.50
  -9   4  -2  105.09   19.20
   9  -4   2  103.79   17.40
   9  -4   2  116.49   20.50
 -10   4  -2  -10.30   29.20
 -10   4  -2  -21.80   24.40
 -10   4  -2   10.90   17.10
 -10   4  -2  -81.09   57.09
 -10   4  -2   -0.70   15.80
  10  -4   2  -10.50    9.70
  10  -4   2  -15.20   14.80
  10  -4   2  -10.20   10.60
  10  -4   2    0.70    4.30
  10  -4   2  -12.40   12.90
 -11   4  -2    6.20   36.30
 -11   4  -2   31.10   34.80
 -11   4  -2   31.10   21.40
 -11   4  -2  105.39   85.59
  11  -4   2   12.40   15.80
  11  -4   2   30.80    9.60
  11  -4   2   22.20   14.60
  11  -4   2   19.90   12.70
  11   3  -2   51.79   10.50
  11   3  -2   43.80   13.70
  11   3  -2   65.79    9.40
  11   3  -2   86.79   11.20
 -11  -3   2   33.60   26.30
 -11  -3   2   13.70   24.50
  10   3  -2    5.00    6.30
  10   3  -2   -9.20   13.80
  10   3  -2    7.40    7.00
  10   3  -2    3.00    5.70
  10   3  -2   -2.70   10.90
 -10  -3   2   39.80   21.40
 -10  -3   2    3.00   19.90
 -10  -3   2    8.60   21.10
 -10  -3   2   -7.40   20.70
   9   3  -2  186.68   27.30
   9   3  -2  179.48   23.80
   9   3  -2  229.18   20.80
   9   3  -2  196.68   21.70
  -9  -3   2  134.99   26.70
  -9  -3   2  149.69   30.60
  -9  -3   2  244.28   29.00
  -9  -3   2  197.88   34.20
   8   3  -2   74.79    9.30
   8   3  -2   65.39   11.30
   8   3  -2   73.19   13.80
   8   3  -2   68.59   11.60
   8   3  -2   60.09   10.70
  -8  -3   2  100.09   18.30
  -8  -3   2   69.19   14.80
  -8  -3   2   59.89   16.60
  -8  -3   2   58.29   18.70
   7   3  -2   58.89   11.80
   7   3  -2   65.49    9.80
   7   3  -2   89.59   11.40
  -7  -3   2  105.69   15.60
  -7  -3   2   48.80   13.50
  -7  -3   2   61.69   13.50
  -7  -3   2   60.19   12.60
  -7  -3   2   56.19   14.70
   6   3  -2  172.68   18.20
   6   3  -2  179.58   17.70
   6   3  -2  150.98   19.70
   6   3  -2  198.48   19.00
   6   3  -2  173.88   18.10
  -6  -3   2  152.18   21.30
  -6  -3   2  203.28   22.30
  -6  -3   2  154.18   21.40
  -6  -3   2  149.69   22.00
  -6  -3   2  153.18   20.40
  -6  -3   2  152.18   21.10
   5   3  -2 1428.26  121.19
   5   3  -2 1363.36  121.29
   5   3  -2 1243.78  121.09
   5   3  -2 1125.99  121.29
   5   3  -2 1303.37  121.39
  -5  -3   2 1123.19  121.69
  -5  -3   2 1179.68  121.89
  -5  -3   2 1193.58  121.89
  -5  -3   2 1171.28  121.99
  -5  -3   2 1104.59  121.79
   4   3  -2   92.19   11.70
   4   3  -2  102.39   10.40
   4   3  -2   95.29   10.30
   4   3  -2   94.69   10.30
  -4  -3   2   86.99   11.90
  -4  -3   2   97.19   12.20
  -4  -3   2  102.39   12.60
  -4  -3   2   80.19   12.40
   3   3  -2  197.98   21.90
   3   3  -2  198.78   20.40
   3   3  -2  218.28   20.60
   3   3  -2  190.38   20.60
   3   3  -2  193.98   20.50
  -3  -3   2  193.58   21.60
  -3  -3   2  220.98   21.00
  -3  -3   2  210.68   22.20
  -3  -3   2  223.48   22.60
   2   3  -2  562.84   53.89
   2   3  -2  523.05   53.99
  -2  -3   2  557.14   55.39
  -2  -3   2  564.94   54.29
  -2  -3   2  520.65   54.49
   1   3  -2 5161.18  458.35
   1   3  -2 4881.21  458.45
   1   3  -2 4838.42  458.45
   1   3  -2 4581.84  459.85
   1   3  -2 4019.30  458.45
  -1  -3   2 4228.98  458.35
  -1  -3   2 4753.52  458.75
  -1  -3   2 4970.40  458.65
  -1  -3   2 4616.64  458.35
  -1  -3   2 4720.33  458.35
  -1  -3   2 4290.67  458.55
  -1  -3   2 4828.02  459.65
   0   3  -2 2476.85  247.08
   0   3  -2 2332.47  246.98
   0   3  -2 2236.58  246.88
   0   3  -2 2635.44  247.28
   0  -3   2 2789.92  248.58
   0  -3   2 2712.53  246.98
   0  -3   2 2376.46  247.08
   0  -3   2 2512.65  247.28
  -1   3  -2 2801.12  284.57
  -1   3  -2 2649.93  284.67
  -1   3  -2 2654.53  284.07
  -1   3  -2 2975.70  284.37
  -1   3  -2 2770.92  284.07
   1  -3   2 2892.91  284.57
   1  -3   2 3147.39  284.27
   1  -3   2 3209.78  285.97
  -2   3  -2    8.20    4.10
  -2   3  -2    5.50    1.30
  -2   3  -2   10.70    6.40
  -2   3  -2    5.30    7.40
  -2   3  -2    2.40    7.10
   2  -3   2    4.40    6.50
   2  -3   2    4.30    4.30
   2  -3   2    3.40    1.90
   2  -3   2    2.50    4.60
   2  -3   2    3.80    2.10
  -3   3  -2  518.45   50.79
  -3   3  -2  473.35   52.29
  -3   3  -2  473.05   53.19
  -3   3  -2  532.65   51.39
  -3   3  -2  550.54   50.59
  -3   3  -2  552.74   50.49
   3  -3   2  514.85   50.59
   3  -3   2  497.75   50.69
   3  -3   2  460.45   51.79
  -4   3  -2 1731.73  171.88
  -4   3  -2 1776.32  172.48
  -4   3  -2 1844.32  172.08
  -4   3  -2 1816.12  171.98
  -4   3  -2 1626.04  172.78
  -4   3  -2 1679.83  171.78
   4  -3   2 1574.54  172.18
   4  -3   2 1868.91  171.98
   4  -3   2 1964.30  171.88
   4  -3   2 1536.15  173.18
  -5   3  -2   18.50    5.30
  -5   3  -2    6.30   14.10
  -5   3  -2   22.30    9.00
  -5   3  -2   17.70   15.90
  -5   3  -2  -11.00   14.10
  -5   3  -2   26.40    4.40
  -5   3  -2   21.50    7.10
  -5   3  -2   37.00    5.30
   5  -3   2   24.70    5.00
   5  -3   2   31.00    5.20
   5  -3   2   32.20    5.00
   5  -3   2   22.10   11.40
  -6   3  -2  158.58   18.70
  -6   3  -2  138.69   25.00
  -6   3  -2  158.98   19.30
  -6   3  -2  140.59   22.50
  -6   3  -2  172.98   17.80
  -6   3  -2  148.29   19.40
   6  -3   2  184.28   18.60
   6  -3   2  190.98   18.10
  -7   3  -2   53.49    8.80
  -7   3  -2   74.19   29.00
  -7   3  -2   63.49   10.40
  -7   3  -2   52.19   21.80
  -7   3  -2   65.59   11.20
  -7   3  -2   45.50   14.50
  -7   3  -2   61.79    9.20
  -7   3  -2   66.79   10.30
   7  -3   2   70.79   10.20
   7  -3   2   45.30    9.30
  -8   3  -2  458.15   43.40
  -8   3  -2  463.15   44.10
  -8   3  -2  396.06   43.30
  -8   3  -2  338.97   52.49
  -8   3  -2  461.05   47.80
   8  -3   2  350.56   41.80
   8  -3   2  386.66   43.60
  -9   3  -2  160.78   22.70
  -9   3  -2   98.89   17.70
  -9   3  -2  138.59   24.60
  -9   3  -2  118.79   19.00
  -9   3  -2  144.99   28.60
   9  -3   2  119.79   17.90
   9  -3   2  115.39   19.40
   9  -3   2   89.49   14.40
 -10   3  -2  110.69   30.90
 -10   3  -2  125.79   21.10
 -10   3  -2   78.09   20.40
 -10   3  -2  118.19   20.90
  10  -3   2  111.79   12.20
  10  -3   2   74.19   16.00
  10  -3   2   99.59   19.00
  10  -3   2   96.39   14.40
 -11   3  -2   57.19   31.20
 -11   3  -2   26.40   23.20
 -11   3  -2    2.80   31.60
 -11   3  -2   27.30   21.50
 -11   3  -2   73.29   82.49
  11  -3   2   10.60    5.40
  11  -3   2    5.80   13.30
  11  -3   2    1.20   14.00
  11  -3   2   11.30   12.80
  11   2  -2    3.60   16.30
  11   2  -2    8.50   12.40
  11   2  -2   14.20    8.30
 -11  -2   2   24.00   24.10
  10   2  -2   -5.90   11.70
  10   2  -2   16.20   15.30
  10   2  -2   24.10   11.70
  10   2  -2   32.60    7.50
 -10  -2   2    2.30   18.80
 -10  -2   2   30.10   19.40
 -10  -2   2   -7.60   19.00
 -10  -2   2    8.50   17.60
   9   2  -2  -11.30   13.90
   9   2  -2   11.10    6.30
   9   2  -2    3.80   10.20
   9   2  -2   -0.30    4.70
  -9  -2   2   24.60   15.90
  -9  -2   2    7.70   14.50
  -9  -2   2   11.30   15.10
  -9  -2   2   -7.30   18.20
  -9  -2   2  -20.10   15.00
   8   2  -2   82.49   12.20
   8   2  -2   66.99   16.20
   8   2  -2   86.59   12.50
  -8  -2   2  115.09   19.90
  -8  -2   2  112.69   16.10
  -8  -2   2  130.39   20.40
  -8  -2   2  100.69   18.20
  -8  -2   2   92.89   16.60
   7   2  -2  468.95   44.50
   7   2  -2  413.96   43.10
   7   2  -2  372.36   45.60
  -7  -2   2  402.06   43.20
  -7  -2   2  359.56   45.50
  -7  -2   2  526.05   45.80
  -7  -2   2  465.95   45.20
  -7  -2   2  488.75   46.70
  -7  -2   2  366.06   45.20
  -7  -2   2  408.26   44.30
   6   2  -2   26.80    4.50
   6   2  -2   36.40    8.90
   6   2  -2   31.30    7.00
   6   2  -2   42.60    8.30
   6   2  -2   25.20    5.30
  -6  -2   2   17.20    9.70
  -6  -2   2   31.60    8.20
  -6  -2   2    9.10    6.80
  -6  -2   2   29.30    6.70
  -6  -2   2   22.70    8.60
  -6  -2   2   41.40    9.00
  -6  -2   2   32.30    9.80
   5   2  -2  196.38   21.90
   5   2  -2  215.78   21.90
   5   2  -2  216.48   22.40
   5   2  -2  212.88   23.20
   5   2  -2  216.98   22.00
  -5  -2   2  224.58   23.20
  -5  -2   2  179.58   23.40
  -5  -2   2  200.18   23.00
  -5  -2   2  259.27   23.80
  -5  -2   2  207.68   23.10
  -5  -2   2  242.98   27.40
   4   2  -2   28.60    5.80
   4   2  -2   22.60    4.10
   4   2  -2   26.90    5.10
   4   2  -2   35.40    4.50
   4   2  -2   28.70    5.10
  -4  -2   2   17.30    5.40
  -4  -2   2   40.30    7.30
  -4  -2   2   40.40    6.00
  -4  -2   2   27.50    5.70
  -4  -2   2   23.50    5.10
  -4  -2   2   32.60    5.40
   3   2  -2   11.10    3.90
   3   2  -2    4.40    1.90
   3   2  -2    2.60    1.60
   3   2  -2    1.80    2.10
   3   2  -2    0.20    2.40
   3   2  -2    0.20    1.80
  -3  -2   2    3.30    3.90
  -3  -2   2    6.30    3.30
  -3  -2   2    3.20    2.10
  -3  -2   2    1.90    2.80
  -3  -2   2    1.20    3.70
  -3  -2   2    3.80    2.90
  -3  -2   2   -1.20    3.50
   2   2  -2   35.10    3.90
   2   2  -2   31.20    3.90
   2   2  -2   33.20    3.60
   2   2  -2   34.40    3.80
   2   2  -2   31.30    6.50
  -2  -2   2   28.60    4.50
  -2  -2   2   35.30    6.40
  -2  -2   2   33.70    3.80
  -2  -2   2   33.90    3.70
   1   2  -2  153.88   13.70
   1   2  -2  131.79   13.60
   1   2  -2  134.69   15.40
   1   2  -2  129.79   13.70
   1   2  -2  144.29   13.60
   1   2  -2  153.28   13.80
  -1  -2   2  136.79   13.60
  -1  -2   2  114.09   14.00
  -1  -2   2  150.48   16.20
  -1  -2   2  127.99   13.90
  -1  -2   2  131.79   13.60
   0   2  -2  144.99   16.70
   0   2  -2  177.38   16.60
   0   2  -2  180.48   16.70
   0   2  -2  176.18   18.40
   0   2  -2  170.58   16.50
   0   2  -2  147.89   16.40
   0   2  -2  137.09   16.50
   0  -2   2  166.78   16.50
   0  -2   2  180.38   16.50
   0  -2   2  186.68   18.00
  -1   2  -2   19.10    2.80
  -1   2  -2   11.70    5.60
  -1   2  -2    9.40    3.80
  -1   2  -2   19.00    2.60
   1  -2   2   18.20    2.50
   1  -2   2   16.60    2.20
   1  -2   2   18.70    4.80
   1  -2   2   23.50    4.00
  -2   2  -2 6513.75  589.44
  -2   2  -2 6046.09  588.44
   2  -2   2 5601.14  589.14
   2  -2   2 6477.05  588.54
   2  -2   2 5261.37  589.24
  -3   2  -2  257.57   27.10
  -3   2  -2  259.07   27.90
  -3   2  -2  296.57   27.00
  -3   2  -2  239.08   28.90
  -3   2  -2  272.27   27.00
   3  -2   2  301.67   27.00
   3  -2   2  234.68   28.40
   3  -2   2  249.38   27.40
   3  -2   2  293.67   26.90
  -4   2  -2   33.50    5.50
  -4   2  -2   17.60   11.80
  -4   2  -2   41.40    5.60
  -4   2  -2   33.90    4.90
  -4   2  -2   16.90    9.50
  -4   2  -2   23.00    3.90
  -4   2  -2   36.80    7.20
  -4   2  -2   24.10    8.40
  -4   2  -2   -1.00   12.30
   4  -2   2   25.60    4.90
   4  -2   2   24.50    4.50
   4  -2   2   27.20    8.10
  -5   2  -2   20.80    4.60
  -5   2  -2    6.90   14.30
  -5   2  -2    1.60   11.70
  -5   2  -2    8.70    4.00
  -5   2  -2   15.60    9.20
  -5   2  -2   11.10    5.10
  -5   2  -2   13.80    5.10
  -5   2  -2   11.10    5.60
   5  -2   2   10.40    4.40
   5  -2   2   12.10    2.90
   5  -2   2   12.60    9.20
  -6   2  -2  128.09   14.00
  -6   2  -2  114.49   14.70
  -6   2  -2   87.59   12.50
  -6   2  -2   82.49   19.80
  -6   2  -2   98.69   13.70
  -6   2  -2   65.69   15.30
   6  -2   2  103.29   12.50
  -7   2  -2   11.90    7.90
  -7   2  -2   -0.80    8.20
  -7   2  -2    1.40   10.40
  -7   2  -2   14.50    8.50
  -7   2  -2    1.30   17.20
  -7   2  -2   -6.90   29.30
  -7   2  -2    6.40   13.10
   7  -2   2   -5.20    4.70
   7  -2   2   -3.80    6.20
  -8   2  -2  -15.70   10.30
  -8   2  -2  -19.70   37.30
  -8   2  -2   -0.40   16.30
  -8   2  -2   12.60   16.90
  -8   2  -2    6.40   12.20
  -8   2  -2   10.40   10.20
   8  -2   2   -7.40    7.20
   8  -2   2    8.40    8.70
   8  -2   2   -9.80   11.00
  -9   2  -2    7.20   20.40
  -9   2  -2    4.60   13.50
  -9   2  -2  -15.90   20.40
  -9   2  -2  -55.99   49.80
  -9   2  -2   -2.50   12.80
  -9   2  -2   -9.30   13.90
   9  -2   2    7.30    6.60
   9  -2   2   -4.70    9.20
   9  -2   2  -18.40   11.70
   9  -2   2   -4.80    8.60
 -10   2  -2    8.40   18.70
 -10   2  -2    8.80   63.79
 -10   2  -2   35.70   27.30
 -10   2  -2    0.30   25.20
 -10   2  -2  -16.40   16.30
 -10   2  -2   13.70   16.50
  10  -2   2   -0.50   12.10
  10  -2   2   -7.10    9.80
  10  -2   2    1.80    9.90
  10  -2   2   -5.70    7.50
  10  -2   2    2.10    6.80
 -11   2  -2  368.86   43.50
 -11   2  -2  411.96   46.80
  11  -2   2  290.67   30.80
  11  -2   2  278.87   32.70
  11  -2   2  283.47   33.60
  12   1  -2   10.50   13.10
  12   1  -2   27.40    9.00
  12   1  -2   11.60    9.30
 -12  -1   2   24.10   29.40
 -12  -1   2   -8.50   27.00
 -12  -1   2   13.60   29.60
  11   1  -2   69.19   16.00
  11   1  -2   84.49   14.00
  11   1  -2  115.99   17.50
 -11  -1   2   84.19   28.30
 -11  -1   2   57.49   25.70
 -11  -1   2  101.89   24.70
 -11  -1   2   84.99   31.30
  10   1  -2    5.90   11.60
  10   1  -2   18.10    7.40
  10   1  -2   -0.10    5.70
  10   1  -2   -2.70   12.40
  10   1  -2  -15.90   17.40
 -10  -1   2   20.60   25.50
 -10  -1   2   -9.50   17.00
 -10  -1   2    2.60   17.70
 -10  -1   2   28.40   17.60
 -10  -1   2   32.50   18.40
   9   1  -2   17.80   10.40
   9   1  -2    9.20   16.30
   9   1  -2   30.80   11.50
   9   1  -2   17.30    6.90
   9   1  -2   18.40    5.10
  -9  -1   2   10.80   12.30
  -9  -1   2    9.30   15.90
  -9  -1   2   38.30   20.80
  -9  -1   2    9.50   13.20
   8   1  -2  119.99   17.00
   8   1  -2  131.29   19.10
   8   1  -2  128.69   15.00
  -8  -1   2  156.38   19.40
  -8  -1   2   78.19   16.80
  -8  -1   2  102.99   20.00
  -8  -1   2  118.19   19.50
  -8  -1   2  162.58   21.30
   7   1  -2  313.27   32.00
   7   1  -2  320.17   30.50
   7   1  -2  255.07   34.30
   7   1  -2  274.87   29.90
  -7  -1   2  286.17   31.30
  -7  -1   2  309.97   31.60
  -7  -1   2  254.27   34.20
  -7  -1   2  300.67   32.70
  -7  -1   2  296.67   29.80
  -7  -1   2  276.97   32.20
  -7  -1   2  257.87   31.50
   6   1  -2  204.68   20.70
   6   1  -2  219.48   21.10
   6   1  -2  218.08   23.10
   6   1  -2  149.39   24.00
  -6  -1   2  184.48   25.10
  -6  -1   2  189.98   21.20
  -6  -1   2  195.38   21.50
  -6  -1   2  183.58   23.20
  -6  -1   2  184.88   23.30
  -6  -1   2  237.48   22.70
  -6  -1   2  168.58   20.90
  -6  -1   2  175.48   21.30
   5   1  -2  867.01   79.79
   5   1  -2  742.13   80.59
   5   1  -2  794.12   80.19
  -5  -1   2  827.82   80.09
  -5  -1   2  894.21   79.99
  -5  -1   2  777.32   80.49
  -5  -1   2  924.61   79.99
  -5  -1   2  699.83   80.69
  -5  -1   2  760.32   79.89
  -5  -1   2  851.21   80.09
  -5  -1   2  813.42   80.39
  -5  -1   2  687.63   80.19
   4   1  -2 1854.41  205.18
   4   1  -2 2016.40  204.68
   4   1  -2 2286.67  204.48
   4   1  -2 1908.81  204.88
  -4  -1   2 1969.10  204.68
  -4  -1   2 2086.89  204.68
  -4  -1   2 2255.97  204.58
  -4  -1   2 2078.39  204.88
  -4  -1   2 2331.87  205.08
  -4  -1   2 2054.39  205.08
  -4  -1   2 1989.10  204.98
   3   1  -2   13.10    2.40
   3   1  -2    7.10    3.70
   3   1  -2    8.50    3.00
   3   1  -2    7.30    2.50
  -3  -1   2    4.10    3.40
  -3  -1   2   11.00    2.50
  -3  -1   2    6.80    2.30
  -3  -1   2   14.00    2.90
  -3  -1   2   10.80    2.20
  -3  -1   2    9.80    2.50
  -3  -1   2    5.30    3.20
   2   1  -2  938.01   91.59
   2   1  -2  922.41   91.69
   2   1  -2  886.31   91.99
   2   1  -2  924.11   91.59
  -2  -1   2  910.31   91.89
  -2  -1   2  819.92   91.59
  -2  -1   2  960.10   91.59
  -2  -1   2  943.81   91.69
  -2  -1   2  964.90   92.09
  -2  -1   2 1020.00   91.79
   1   1  -2  493.85   49.00
   1   1  -2  462.75   48.90
   1   1  -2  522.85   48.80
   1   1  -2  439.76   49.50
   1   1  -2  487.75   48.90
   1   1  -2  530.85   49.00
  -1  -1   2  544.75   49.00
  -1  -1   2  505.85   49.00
  -1  -1   2  520.85   48.80
  -1  -1   2  455.85   48.90
  -1  -1   2  485.55   49.00
  -1  -1   2  500.85   49.50
   0   1  -2 1066.69  106.69
   0   1  -2 1017.60  106.19
   0   1  -2 1050.29  106.29
   0   1  -2 1034.10  106.29
   0   1  -2 1109.99  106.19
   0   1  -2 1185.88  106.29
   0   1  -2 1104.39  106.19
   0  -1   2 1057.99  106.19
   0  -1   2  929.81  106.19
   0  -1   2 1084.39  106.19
   0  -1   2 1131.39  106.29
   0  -1   2 1092.09  106.69
   0  -1   2 1158.68  106.19
  -1   1  -2   18.30    3.40
  -1   1  -2   22.00    5.40
  -1   1  -2   25.10    2.50
  -1   1  -2   25.20    4.00
  -1   1  -2   25.00    2.90
  -1   1  -2   20.40    2.40
   1  -1   2   19.30    2.30
   1  -1   2   27.70    2.80
   1  -1   2   17.00    3.50
   1  -1   2   17.50    2.60
   1  -1   2   22.90    3.80
  -2   1  -2 4695.63  425.26
  -2   1  -2 4512.15  425.26
  -2   1  -2 4067.89  426.06
  -2   1  -2 4002.70  425.46
  -3   1  -2  451.45   44.00
  -3   1  -2  457.65   44.40
  -3   1  -2  460.45   44.30
  -3   1  -2  435.76   45.90
   3  -1   2  411.06   43.90
  -4   1  -2   75.29    9.50
  -4   1  -2   48.70    8.20
  -4   1  -2   61.59    6.20
  -4   1  -2   41.40   11.00
  -4   1  -2   54.99    7.60
  -4   1  -2   61.49    9.30
  -4   1  -2   81.19   12.60
   4  -1   2   57.49    7.40
  -5   1  -2    1.10   14.00
  -5   1  -2    1.50    5.80
  -5   1  -2  -27.20   14.90
  -5   1  -2   10.10    6.00
  -5   1  -2    7.40    5.10
  -5   1  -2   -4.40    9.20
  -5   1  -2    5.80    4.80
  -5   1  -2   12.20   11.20
   5  -1   2    8.70    4.10
   5  -1   2    9.90    7.00
  -6   1  -2  266.47   25.20
  -6   1  -2  175.58   24.00
  -6   1  -2  215.08   24.40
   6  -1   2  233.28   23.80
  -7   1  -2   -3.70   13.50
  -7   1  -2    8.00   14.40
  -7   1  -2   12.10    8.60
  -7   1  -2    8.40    8.80
  -7   1  -2   -8.60   10.80
  -7   1  -2  -54.59   27.40
  -7   1  -2    5.90    7.70
   7  -1   2    4.80    5.70
   7  -1   2  -15.60    9.40
   7  -1   2    7.90    7.50
  -8   1  -2  179.58   24.50
  -8   1  -2  160.98   29.50
  -8   1  -2  186.78   23.80
  -8   1  -2  222.88   25.80
  -8   1  -2  167.08   26.40
  -8   1  -2  177.68   30.50
   8  -1   2  157.38   20.50
   8  -1   2  204.68   22.20
  -9   1  -2   86.59   51.19
  -9   1  -2   34.50   14.30
  -9   1  -2   41.60   16.40
  -9   1  -2   45.20   19.80
  -9   1  -2   38.60   21.70
  -9   1  -2   20.90   21.30
  -9   1  -2   28.00   13.60
   9  -1   2   30.80    8.80
   9  -1   2   32.80   10.20
   9  -1   2   40.90    7.00
 -10   1  -2  206.18   32.20
 -10   1  -2  228.58   37.30
 -10   1  -2  224.38   30.20
  10  -1   2  163.48   19.30
  10  -1   2  165.28   21.90
  10  -1   2  136.69   21.10
 -11   1  -2   53.29   25.20
 -11   1  -2  136.89   72.89
 -11   1  -2   60.99   23.30
 -11   1  -2    8.40   28.70
 -11   1  -2  101.99   33.20
 -11   1  -2   72.59   23.50
  11  -1   2   17.90    8.30
  11  -1   2   50.69   10.10
  11  -1   2   40.70   11.30
  11  -1   2   37.80    7.20
  11  -1   2   33.20    9.30
  11  -1   2   30.00   10.70
  11  -1   2    7.90   12.90
  12   0  -2   -1.20   13.30
  12   0  -2   10.00    9.40
  12   0  -2   28.50   10.10
  12   0  -2    1.90   18.50
 -12   0   2    8.40   26.80
 -12   0   2   37.40   32.70
 -12   0   2    3.80   38.20
 -12   0   2   47.50   27.20
  11   0  -2   -3.20   12.00
  11   0  -2  -26.00   18.00
  11   0  -2    2.20    8.00
  11   0  -2    5.40    7.50
 -11   0   2   17.50   22.70
 -11   0   2   11.60   21.20
 -11   0   2   32.00   32.00
 -11   0   2  -13.20   21.10
  10   0  -2  429.56   39.70
  10   0  -2  444.96   40.30
  10   0  -2  319.37   43.00
 -10   0   2  397.06   45.70
 -10   0   2  339.87   45.90
 -10   0   2  393.96   55.29
 -10   0   2  329.97   46.90
   9   0  -2   14.30   15.00
   9   0  -2   15.50   18.10
   9   0  -2    8.40    6.50
   9   0  -2    4.10   11.70
  -9   0   2    1.90   11.70
  -9   0   2   12.00   13.20
  -9   0   2   14.30   20.70
  -9   0   2   -3.40   13.10
  -9   0   2   12.90   12.80
   8   0  -2  114.39   14.40
   8   0  -2  101.89   17.50
   8   0  -2  118.69   19.80
  -8   0   2  114.59   22.20
  -8   0   2  147.69   18.00
  -8   0   2   88.89   18.20
  -8   0   2  123.89   19.00
  -8   0   2  111.29   19.30
   7   0  -2   89.59   12.00
   7   0  -2  113.69   13.70
   7   0  -2   84.29   18.30
   7   0  -2   92.89   17.20
  -7   0   2   86.49   21.90
  -7   0   2  102.19   17.80
  -7   0   2   97.49   16.40
  -7   0   2   80.19   14.00
  -7   0   2  133.99   14.20
  -7   0   2  104.79   13.60
  -7   0   2   98.49   14.30
   6   0  -2  215.08   29.40
   6   0  -2  233.08   27.80
   6   0  -2  281.17   26.30
   6   0  -2  251.07   26.20
  -6   0   2  231.58   27.70
  -6   0   2  289.67   27.00
  -6   0   2  242.38   31.40
   5   0  -2  574.04   55.99
   5   0  -2  511.75   56.89
   5   0  -2  519.15   57.09
  -5   0   2  568.54   55.99
  -5   0   2  467.15   56.99
  -5   0   2  573.84   56.49
  -5   0   2  587.04   56.59
  -5   0   2  599.34   56.59
  -5   0   2  642.54   56.19
   4   0  -2   69.99    9.70
   4   0  -2   68.59    9.90
   4   0  -2   67.69    8.50
  -4   0   2   73.19    9.40
  -4   0   2   77.99    8.10
  -4   0   2   58.29    9.50
  -4   0   2   83.89   10.20
  -4   0   2   74.19   10.70
  -4   0   2   80.19    8.60
   3   0  -2   97.89   11.00
   3   0  -2   96.19   10.60
   3   0  -2  106.19   10.30
   3   0  -2  106.59   11.00
  -3   0   2  100.39   11.50
  -3   0   2  108.79   10.90
  -3   0   2  105.79   12.00
  -3   0   2  106.99   10.40
  -3   0   2   92.99   10.50
  -3   0   2   89.79   11.10
  -3   0   2   98.89   11.30
   2   0  -2 2025.10  208.38
   2   0  -2 2044.40  208.48
   2   0  -2 2153.88  208.78
   2   0  -2 1906.51  208.48
   2   0  -2 2222.68  208.28
  -2   0   2 2126.09  208.38
  -2   0   2 2182.78  208.28
  -2   0   2 2335.37  208.38
  -2   0   2 1973.20  208.88
  -2   0   2 2181.38  208.58
  -2   0   2 2118.59  208.28
   1   0  -2  378.36   37.30
   1   0  -2  345.97   37.70
   1   0  -2  362.36   37.20
   1   0  -2  374.26   37.20
  -1   0   2  395.96   37.20
  -1   0   2  331.97   37.20
  -1   0   2  403.46   37.20
  -1   0   2  390.26   37.30
  -1   0   2  398.26   37.10
  -1   0   2  325.17   37.70
  -1   0   2  431.06   37.20
   0   0  -2  293.77   26.70
   0   0  -2  290.77   26.80
   0   0  -2  305.67   26.70
   0   0  -2  292.97   26.80
   0   0  -2  254.07   26.70
   0   0  -2  267.47   26.80
   0   0  -2  227.58   27.10
   0   0   2  285.77   26.80
   0   0   2  257.37   26.80
   0   0   2  233.08   27.10
   0   0   2  265.97   26.70
   0   0   2  279.67   26.70
   0   0   2  272.77   26.70
   0   0   2  256.17   26.80
  -1   0  -2  560.84   57.69
  -1   0  -2  593.94   57.49
  -1   0  -2  626.94   57.79
   1   0   2  519.45   57.39
   1   0   2  589.64   57.39
   1   0   2  605.44   57.39
  -2   0  -2 1386.76  145.79
  -2   0  -2 1559.14  145.59
  -3   0  -2  362.26   35.80
  -3   0  -2  350.56   36.50
  -4   0  -2 1357.46  140.19
  -4   0  -2 1436.56  139.29
  -4   0  -2 1292.47  139.39
  -4   0  -2 1496.85  139.79
   4   0   2 1457.05  139.29
  -5   0  -2  156.88   21.00
  -5   0  -2  150.18   18.20
  -5   0  -2  158.48   17.90
  -5   0  -2  156.18   19.30
  -5   0  -2  170.48   19.80
  -6   0  -2  238.78   27.20
  -6   0  -2  264.17   27.00
  -6   0  -2  207.78   25.90
  -6   0  -2  194.48   28.50
  -6   0  -2  242.08   25.60
   6   0   2  237.58   24.00
  -7   0  -2  105.19   17.50
  -7   0  -2  164.78   34.00
  -7   0  -2   87.29   16.80
  -7   0  -2  102.99   16.00
  -7   0  -2  140.49   18.20
  -7   0  -2   66.29   15.00
  -7   0  -2   92.99   19.20
   7   0   2  105.69   12.80
   7   0   2  112.59   15.10
  -8   0  -2   22.80   35.90
  -8   0  -2   20.40   16.90
  -8   0  -2   26.90   11.90
  -8   0  -2   25.90   11.20
  -8   0  -2   41.40   13.20
  -8   0  -2   47.70   16.60
  -8   0  -2   17.60   17.10
   8   0   2   19.20    6.40
   8   0   2   26.60    8.50
   8   0   2   35.30    5.70
   8   0   2    7.20    9.40
  -9   0  -2    5.70   18.40
  -9   0  -2   28.90   22.10
  -9   0  -2   11.50   13.70
  -9   0  -2    2.50   13.30
  -9   0  -2   12.00   20.80
  -9   0  -2   32.80   22.10
  -9   0  -2    4.80   47.40
   9   0   2    8.70    4.60
   9   0   2    3.40    5.60
   9   0   2   -6.90    9.70
   9   0   2   10.60    7.00
 -10   0  -2   37.20   31.00
 -10   0  -2   -6.20   22.10
 -10   0  -2   -7.30   16.70
 -10   0  -2   53.29   28.40
 -10   0  -2    7.60   17.50
 -10   0  -2   -1.40   21.10
 -10   0  -2   26.90   60.29
  10   0   2    7.30   10.10
  10   0   2   16.20    6.30
  10   0   2   15.90    6.80
  10   0   2    5.30    5.00
  10   0   2    5.10    9.50
 -11   0  -2   31.80   26.60
 -11   0  -2   19.70   27.30
 -11   0  -2   46.50   22.70
 -11   0  -2 -130.99   67.79
 -11   0  -2  103.39   33.70
 -11   0  -2   47.20   28.00
  11   0   2   19.40    8.40
  11   0   2   -2.90   11.40
  11   0   2   27.80    9.50
  11   0   2   23.10    9.70
  11   0   2   14.40    6.60
  11   0   2   14.80    7.90
  11   0   2   18.80   10.20
  12  -1  -2   -9.70    9.10
  12  -1  -2   -7.90   13.60
  12  -1  -2    8.10   10.60
  12  -1  -2  -17.30   20.40
 -12   1   2   23.60   39.30
 -12   1   2   37.30   26.60
 -12   1   2   -2.00   29.10
 -12   1   2  -18.00   25.30
  11  -1  -2   82.39   14.60
  11  -1  -2   77.39   17.10
 -11   1   2   58.79   24.70
 -11   1   2   81.29   21.70
 -11   1   2  154.98   42.00
 -11   1   2  123.39   25.30
  10  -1  -2   27.30   17.00
  10  -1  -2  -15.30   21.00
  10  -1  -2   36.90   14.30
 -10   1   2   41.30   26.80
 -10   1   2   52.79   16.10
 -10   1   2   63.99   16.60
 -10   1   2   84.69   18.60
   9  -1  -2   -7.90   12.70
   9  -1  -2   12.20    5.90
   9  -1  -2    7.60    7.30
   9  -1  -2   -7.30   12.90
   9  -1  -2  -39.60   19.30
  -9   1   2   -5.90   20.70
  -9   1   2   -9.10   12.60
  -9   1   2    0.60   11.70
  -9   1   2   25.40   11.50
  -9   1   2    3.70   11.30
   8  -1  -2  -12.20   17.80
   8  -1  -2   38.90    6.30
   8  -1  -2   18.90   13.10
   8  -1  -2   33.80    6.60
  -8   1   2   33.30    7.80
  -8   1   2   31.90    9.00
  -8   1   2    0.40   26.40
  -8   1   2   23.60   16.90
  -8   1   2   12.30    7.60
  -8   1   2   28.00   11.10
  -8   1   2   24.10    9.40
  -8   1   2   27.80    9.70
   7  -1  -2  274.37   28.10
   7  -1  -2  271.67   28.90
   7  -1  -2  213.48   31.10
  -7   1   2  252.77   30.00
  -7   1   2  202.18   38.30
  -7   1   2  300.87   29.70
  -7   1   2  275.37   28.90
  -7   1   2  279.67   30.30
  -7   1   2  308.57   28.50
   6  -1  -2    0.70    9.50
   6  -1  -2   -2.00   10.10
   6  -1  -2   -0.50    4.70
  -6   1   2    1.40    6.60
  -6   1   2    1.10    5.00
  -6   1   2    0.40    6.90
  -6   1   2    1.60    4.70
  -6   1   2    3.50   11.60
  -6   1   2    0.70   10.70
  -6   1   2    0.60    6.90
   5  -1  -2   50.69    9.40
   5  -1  -2   57.29   10.10
   5  -1  -2   47.70    6.80
  -5   1   2   59.39    9.40
  -5   1   2   30.60    7.70
  -5   1   2   50.69   10.30
  -5   1   2   50.79    6.60
  -5   1   2   43.20    6.70
  -5   1   2   31.70    9.50
  -5   1   2   65.09    9.20
   4  -1  -2  756.32   70.79
   4  -1  -2  724.43   71.59
   4  -1  -2  695.93   71.79
  -4   1   2  696.63   70.79
  -4   1   2  770.02   71.39
  -4   1   2  725.53   71.99
  -4   1   2  694.63   71.19
  -4   1   2  666.83   71.89
  -4   1   2  669.73   71.99
  -4   1   2  755.42   70.89
   3  -1  -2  150.98   17.30
   3  -1  -2  177.68   16.50
   3  -1  -2  161.58   17.40
  -3   1   2  145.59   16.50
  -3   1   2  192.58   18.00
  -3   1   2  174.08   17.10
  -3   1   2  137.89   18.60
  -3   1   2  146.49   17.50
  -3   1   2  183.18   17.00
   2  -1  -2 3451.35  380.06
   2  -1  -2 3643.14  379.96
  -2   1   2 3987.90  380.56
  -2   1   2 4358.96  379.96
   1  -1  -2  734.33   78.69
   1  -1  -2  814.22   78.59
   1  -1  -2  703.23   78.69
  -1   1   2  767.42   78.69
  -1   1   2  899.11   78.79
  -1   1   2  824.72   78.59
  -1   1   2  813.22   78.69
  -1   1   2  825.62   78.69
   0  -1  -2  329.67   35.80
   0  -1  -2  410.06   36.00
   0  -1  -2  374.96   35.90
   0  -1  -2  362.56   36.00
   0  -1  -2  323.87   35.90
   0   1   2  351.46   35.80
   0   1   2  373.66   36.00
   0   1   2  400.56   35.90
   0   1   2  354.16   35.90
   0   1   2  357.06   35.90
  -1  -1  -2  235.98   25.10
  -1  -1  -2  279.07   24.80
  -1  -1  -2  275.57   24.80
  -1  -1  -2  254.47   24.60
   1   1   2  229.48   24.80
   1   1   2  203.28   24.70
   1   1   2  268.57   24.70
   1   1   2  238.28   24.50
  -2  -1  -2  763.52   71.99
  -2  -1  -2  754.42   71.49
  -2  -1  -2  690.83   71.59
   2   1   2  682.33   71.49
   2   1   2  657.13   71.29
   2   1   2  789.52   71.29
  -3  -1  -2  161.48   20.20
  -3  -1  -2  176.18   18.40
  -3  -1  -2  162.88   18.40
   3   1   2  174.88   17.40
   3   1   2  182.78   17.30
  -4  -1  -2  535.65   52.09
  -4  -1  -2  444.36   51.89
  -4  -1  -2  545.65   51.79
  -5  -1  -2   21.30    8.20
  -5  -1  -2   38.40    8.40
  -5  -1  -2   33.90    6.80
  -5  -1  -2   38.80    9.30
  -5  -1  -2    8.30   23.80
  -5  -1  -2   12.10   15.30
  -5  -1  -2   21.60   11.90
  -5  -1  -2   19.70    8.00
   5   1   2   14.90    5.90
  -6  -1  -2   16.20    7.30
  -6  -1  -2   10.00   23.00
  -6  -1  -2   16.80   10.30
  -6  -1  -2  -23.70   24.70
  -6  -1  -2    9.90   13.60
  -6  -1  -2   38.30   10.80
  -6  -1  -2   26.20   10.10
  -6  -1  -2   14.60    9.60
   6   1   2    2.10    6.60
   6   1   2   25.90    4.10
   6   1   2   13.20    6.70
   6   1   2   21.10    4.10
  -7  -1  -2  120.49   23.50
  -7  -1  -2  248.18   36.30
  -7  -1  -2  187.58   23.70
  -7  -1  -2  103.79   42.00
  -7  -1  -2  171.78   25.60
  -7  -1  -2  136.79   23.50
  -7  -1  -2  185.18   21.50
  -7  -1  -2  122.09   20.80
   7   1   2  167.18   19.40
   7   1   2  162.68   17.40
   7   1   2  168.88   16.80
  -8  -1  -2   18.10   11.50
  -8  -1  -2    9.70   13.10
  -8  -1  -2    2.40   16.40
  -8  -1  -2   10.20   18.00
  -8  -1  -2    1.80   13.60
  -8  -1  -2    8.40   14.60
  -8  -1  -2  -18.40   35.20
   8   1   2    9.00    4.90
   8   1   2    8.60    7.80
   8   1   2   15.80    4.00
   8   1   2    6.00    4.90
   8   1   2   -2.20    8.20
  -9  -1  -2  -12.40   17.30
  -9  -1  -2    1.80   21.20
  -9  -1  -2  -62.29   45.80
  -9  -1  -2   -9.60   14.00
  -9  -1  -2   -4.30   14.90
  -9  -1  -2   14.90   22.90
  -9  -1  -2   10.10   18.50
   9   1   2    4.10    4.10
   9   1   2    5.70    5.70
   9   1   2   -5.80    8.40
   9   1   2   -8.00    9.00
   9   1   2    5.60    6.00
   9   1   2    2.10    4.50
 -10  -1  -2  126.79   27.50
 -10  -1  -2  242.68   40.50
 -10  -1  -2  134.89   27.80
 -10  -1  -2  117.29   39.50
 -10  -1  -2  148.49   27.30
  10   1   2  133.39   16.20
  10   1   2  142.99   15.70
  10   1   2  125.69   15.50
  10   1   2  149.69   15.80
  10   1   2   99.49   19.00
 -11  -1  -2   75.39   25.40
 -11  -1  -2  172.18   34.60
 -11  -1  -2   66.29   30.40
 -11  -1  -2   58.29   24.50
 -11  -1  -2   25.40   28.90
  11   1   2   64.69   12.10
  11   1   2   82.49   16.10
  11   1   2   84.89   13.00
  11   1   2   46.80   13.70
  11   1   2   88.49   12.90
  11   1   2   86.59   11.80
  12  -2  -2   29.90   10.40
  12  -2  -2   14.60   14.40
 -12   2   2    4.40   25.50
 -12   2   2   76.19   31.20
 -12   2   2   67.59   24.20
 -12   2   2  116.79   44.40
  11  -2  -2    2.20   14.70
  11  -2  -2   -9.00   20.40
  11  -2  -2  -46.00   22.20
 -11   2   2   -4.60   22.10
 -11   2   2   54.59   60.09
 -11   2   2   16.50   18.60
  10  -2  -2   34.70    8.20
  10  -2  -2  -34.50   23.10
  10  -2  -2   34.70   18.00
  10  -2  -2   -3.90   14.40
 -10   2   2    6.20   29.40
 -10   2   2   17.10   14.00
 -10   2   2   32.20   16.70
   9  -2  -2   -6.00   14.20
   9  -2  -2   17.10   13.90
   9  -2  -2   17.20    6.00
  -9   2   2   18.80   10.00
  -9   2   2    3.80   11.60
  -9   2   2   -1.90   23.00
  -9   2   2  -30.30   36.30
  -9   2   2   48.40   14.50
   8  -2  -2  415.66   38.60
   8  -2  -2  370.86   38.50
   8  -2  -2  340.27   40.30
  -8   2   2  369.06   41.30
  -8   2   2  282.87   48.10
  -8   2   2  416.56   39.00
  -8   2   2  316.87   40.60
  -8   2   2  406.06   39.00
  -8   2   2  393.66   39.50
   7  -2  -2  302.17   29.30
   7  -2  -2  235.28   36.90
   7  -2  -2  240.08   35.40
   7  -2  -2  285.97   30.60
  -7   2   2  301.47   29.90
  -7   2   2  248.98   32.30
  -7   2   2  295.27   33.60
  -7   2   2  286.87   31.80
  -7   2   2  309.67   29.60
  -7   2   2  297.17   29.50
   6  -2  -2   97.39   11.00
   6  -2  -2   89.19    9.90
   6  -2  -2   73.99   15.60
   6  -2  -2   57.99   14.60
  -6   2   2   71.89   13.20
  -6   2   2   60.49   11.30
  -6   2   2   80.19   14.90
  -6   2   2   61.49   15.80
  -6   2   2   75.89    9.70
  -6   2   2   96.19   10.50
  -6   2   2   82.69   17.70
   5  -2  -2   27.00   11.60
   5  -2  -2   32.30    5.00
   5  -2  -2   23.10    8.30
  -5   2   2   36.60    5.50
  -5   2   2    9.00    9.20
  -5   2   2   33.50    4.70
  -5   2   2   15.20    7.50
   4  -2  -2    2.80    2.50
   4  -2  -2   -7.60    5.70
   4  -2  -2    3.90    4.10
  -4   2   2    1.60    7.40
  -4   2   2    2.60    2.20
  -4   2   2    0.60    2.00
  -4   2   2   -0.10    5.30
  -4   2   2    1.90    6.00
  -4   2   2   -3.00    3.40
   3  -2  -2  237.18   23.20
   3  -2  -2  239.08   23.70
   3  -2  -2  223.18   24.40
  -3   2   2  242.78   23.10
  -3   2   2  229.48   24.30
  -3   2   2  232.98   23.60
  -3   2   2  237.58   23.10
  -3   2   2  218.68   23.40
  -3   2   2  205.08   25.70
   2  -2  -2    7.30    1.80
   2  -2  -2    5.90    4.50
   2  -2  -2    7.50    2.80
   2  -2  -2    6.80    2.20
  -2   2   2   11.80    2.10
  -2   2   2   16.00    4.80
  -2   2   2    5.40    2.20
  -2   2   2    5.20    4.70
  -2   2   2    5.20    2.30
  -2   2   2    8.90    3.00
  -2   2   2    5.00    1.60
   1  -2  -2    2.30    1.50
   1  -2  -2    4.50    4.50
   1  -2  -2    1.80    1.50
  -1   2   2    1.90    1.80
  -1   2   2    0.00    3.70
  -1   2   2    1.90    1.20
  -1   2   2    5.30    1.60
  -1   2   2   10.90    3.80
  -1   2   2    2.60    1.30
   0  -2  -2 5449.25  480.05
   0  -2  -2 5176.08  480.15
   0  -2  -2 5352.46  480.05
   0   2   2 4911.01  480.25
   0   2   2 4792.92  480.15
   0   2   2 4134.09  480.65
   0   2   2 4320.97  480.05
  -1  -2  -2 5199.78  569.64
  -1  -2  -2 6331.67  569.54
   1   2   2 5461.75  570.14
   1   2   2 5827.22  569.54
   1   2   2 6163.98  569.54
   1   2   2 5739.93  569.64
  -2  -2  -2   34.20    5.60
  -2  -2  -2   32.10    5.30
  -2  -2  -2   33.10    6.00
  -2  -2  -2   23.10    7.90
  -2  -2  -2   37.40    6.60
  -2  -2  -2   49.10    6.50
  -2  -2  -2   30.80    4.20
   2   2   2   46.10    4.80
   2   2   2   39.40    4.30
   2   2   2   30.70    6.10
   2   2   2   36.80    4.00
   2   2   2   37.00    4.70
   2   2   2   42.90    4.50
  -3  -2  -2 2016.60  207.78
  -3  -2  -2 2163.18  208.18
  -3  -2  -2 2087.29  207.78
   3   2   2 1949.90  207.48
   3   2   2 2315.37  207.68
  -4  -2  -2   93.29   11.60
  -4  -2  -2   42.70   16.20
  -4  -2  -2   71.69   10.50
  -4  -2  -2   75.99   11.80
   4   2   2   72.69    8.50
   4   2   2   73.69    8.60
   4   2   2   85.69    8.70
   4   2   2   87.69    8.50
  -5  -2  -2  452.85   52.19
  -5  -2  -2  404.56   55.49
  -5  -2  -2  591.04   51.69
  -5  -2  -2  564.14   51.69
   5   2   2  555.84   50.19
   5   2   2  435.96   50.59
   5   2   2  509.25   51.09
  -6  -2  -2  147.89   23.20
  -6  -2  -2  151.78   31.60
  -6  -2  -2  115.69   22.40
  -6  -2  -2  145.79   24.30
  -6  -2  -2  190.78   35.30
   6   2   2  197.88   16.90
   6   2   2  131.69   18.60
   6   2   2  191.18   18.20
   6   2   2  159.98   18.90
  -7  -2  -2  153.68   22.40
  -7  -2  -2  138.69   22.10
  -7  -2  -2  190.48   41.20
  -7  -2  -2  194.18   45.80
  -7  -2  -2  212.68   24.30
  -7  -2  -2  168.18   25.30
  -7  -2  -2  125.49   24.20
   7   2   2  165.98   16.80
   7   2   2  161.88   17.10
  -8  -2  -2   89.29   16.20
  -8  -2  -2   76.59   22.60
  -8  -2  -2   53.79   18.10
  -8  -2  -2   63.19   19.70
  -8  -2  -2   89.89   18.20
  -8  -2  -2   62.59   18.10
  -8  -2  -2  143.59   36.30
   8   2   2   82.99   13.50
   8   2   2   88.99    9.80
   8   2   2   83.69   11.40
   8   2   2   95.79   10.30
  -9  -2  -2 1041.70  100.99
  -9  -2  -2  963.80  103.79
  -9  -2  -2 1107.89  104.19
  -9  -2  -2 1058.09  100.09
  -9  -2  -2  837.92  100.89
   9   2   2  953.00   96.39
   9   2   2  959.90   96.39
   9   2   2  906.91   97.39
 -10  -2  -2  -29.10   32.50
 -10  -2  -2    8.30   24.70
 -10  -2  -2    4.40   33.00
 -10  -2  -2   26.10   23.20
 -10  -2  -2   -4.30   19.20
 -10  -2  -2    4.90   29.00
  10   2   2   -2.80   10.70
  10   2   2    4.10    5.50
  10   2   2   -5.30    6.40
  10   2   2   -2.70    5.50
  10   2   2   -1.40    5.00
  10   2   2   -8.60    9.50
  10   2   2   -4.40    9.10
 -11  -2  -2   95.79   36.00
 -11  -2  -2   26.90   25.50
 -11  -2  -2   63.99   29.30
 -11  -2  -2   66.69   48.40
  11   2   2   44.90   11.90
  11   2   2   31.10    9.60
  11   2   2   44.80    9.10
  11   2   2   31.50   15.30
  11   2   2   56.09    8.90
  12  -3  -2  -16.80   15.60
  12  -3  -2   13.00    9.90
 -12   3   2  -29.90   43.30
 -12   3   2    0.70   25.50
 -12   3   2    4.30   21.40
  11  -3  -2   39.00    9.30
  11  -3  -2   14.30   23.40
  11  -3  -2  -37.40   27.00
 -11   3   2   64.09   38.50
 -11   3   2   28.60   19.50
 -11   3   2   25.80   23.20
 -11   3   2   21.40   17.20
  10  -3  -2   23.20   19.20
  10  -3  -2  -28.80   26.00
  10  -3  -2   -3.30   16.30
 -10   3   2   52.39   13.10
 -10   3   2   17.60   32.00
 -10   3   2   40.20   16.90
 -10   3   2   35.30   17.90
   9  -3  -2  313.17   38.70
   9  -3  -2  339.87   33.00
  -9   3   2  296.07   51.09
  -9   3   2  311.17   34.00
  -9   3   2  350.96   35.70
  -9   3   2  296.47   37.90
  -9   3   2  234.48   40.60
   8  -3  -2   73.69   12.60
   8  -3  -2   21.40   16.20
   8  -3  -2   30.20   22.80
  -8   3   2   53.09    8.60
  -8   3   2   66.49   13.00
  -8   3   2   11.00   24.90
  -8   3   2   55.29   10.20
  -8   3   2   46.30   14.20
   7  -3  -2   89.69   20.00
   7  -3  -2  103.69   13.60
   7  -3  -2   72.09   11.00
   7  -3  -2   80.99   19.70
  -7   3   2   97.49   10.80
  -7   3   2   58.79   22.60
  -7   3   2   81.89   14.80
  -7   3   2   91.39   13.90
  -7   3   2   50.79   16.00
  -7   3   2   46.50   21.20
   6  -3  -2  108.79   21.00
   6  -3  -2  115.69   15.10
  -6   3   2  122.69   19.50
  -6   3   2  144.69   14.40
  -6   3   2  138.39   14.60
  -6   3   2  147.39   16.90
  -6   3   2  124.79   24.40
   5  -3  -2   12.90    4.30
   5  -3  -2   13.20    6.00
   5  -3  -2    8.80    7.40
   5  -3  -2   -6.90   10.50
  -5   3   2    3.80    9.10
  -5   3   2   19.00    3.40
  -5   3   2    9.50   12.20
  -5   3   2   24.90    8.40
  -5   3   2    7.70    2.90
  -5   3   2   14.20    4.90
   4  -3  -2   11.10    3.30
   4  -3  -2   20.40    8.60
   4  -3  -2    7.20    6.10
   4  -3  -2   19.90    5.10
  -4   3   2   28.80   12.30
  -4   3   2   11.60    7.10
  -4   3   2    7.00    3.60
  -4   3   2   20.80    7.70
  -4   3   2    9.80    2.90
  -4   3   2   19.10    2.90
   3  -3  -2   87.59   12.60
   3  -3  -2  106.39   10.60
   3  -3  -2   77.99   14.00
   3  -3  -2   98.09   11.60
  -3   3   2  115.29   12.90
  -3   3   2   99.99   11.20
  -3   3   2   93.99   11.50
  -3   3   2  101.69   10.60
  -3   3   2  110.59   10.50
   2  -3  -2  126.39   13.20
   2  -3  -2  129.99   13.60
  -2   3   2  123.19   15.40
  -2   3   2  128.19   13.20
  -2   3   2  130.69   13.30
  -2   3   2  120.89   12.60
  -2   3   2  122.89   12.70
  -2   3   2  117.49   13.60
   1  -3  -2  302.57   30.90
   1  -3  -2  294.67   30.80
  -1   3   2  305.37   30.80
  -1   3   2  290.07   30.80
  -1   3   2  317.17   32.50
  -1   3   2  300.57   30.80
  -1   3   2  318.47   30.90
  -1   3   2  345.37   31.00
   0  -3  -2 5798.72  587.04
   0   3   2 6289.77  587.14
   0   3   2 5400.26  587.34
   0   3   2 6375.06  588.24
  -1  -3  -2  141.09   15.40
  -1  -3  -2  173.18   15.90
  -1  -3  -2  157.98   15.30
  -1  -3  -2  136.39   15.40
   1   3   2  138.99   15.40
   1   3   2  159.08   15.60
   1   3   2  142.09   15.80
   1   3   2  153.58   15.20
   1   3   2  165.58   15.40
   1   3   2  174.78   17.60
  -2  -3  -2    2.60    4.80
  -2  -3  -2    6.60    5.30
  -2  -3  -2   -6.60    6.10
  -2  -3  -2   -0.40    3.20
  -2  -3  -2    6.60    3.00
  -2  -3  -2   -1.40    9.90
   2   3   2    4.90    2.40
   2   3   2    1.60    1.60
   2   3   2    3.40    1.30
   2   3   2    1.80    1.60
   2   3   2    5.80    1.80
   2   3   2   -1.20    4.50
  -3  -3  -2  975.80   87.49
  -3  -3  -2  760.62   87.19
  -3  -3  -2  856.01   86.89
   3   3   2  845.82   86.39
   3   3   2  940.91   86.49
  -4  -3  -2  343.87   38.20
  -4  -3  -2  368.86   37.10
  -4  -3  -2  378.16   37.60
   4   3   2  374.26   35.80
   4   3   2  364.86   36.10
   4   3   2  312.17   35.40
   4   3   2  348.17   35.50
   4   3   2  326.17   35.50
   4   3   2  394.76   35.80
  -5  -3  -2 1012.10  107.59
  -5  -3  -2 1137.99  108.99
  -5  -3  -2  956.60  112.89
  -5  -3  -2  931.01  108.69
  -5  -3  -2 1135.99  108.29
  -5  -3  -2 1123.19  107.29
   5   3   2 1077.19  106.49
   5   3   2 1179.28  106.39
   5   3   2 1048.80  106.39
   5   3   2 1124.49  106.49
  -6  -3  -2  111.09   20.20
  -6  -3  -2   82.59   31.70
  -6  -3  -2   94.39   13.80
  -6  -3  -2   35.10   18.40
  -6  -3  -2   68.19   15.20
  -6  -3  -2   99.59   15.80
  -6  -3  -2   39.40   15.10
  -6  -3  -2   48.20   14.60
   6   3   2   56.79    9.50
   6   3   2   74.89    9.00
   6   3   2   70.89    8.60
   6   3   2   75.89    8.10
   6   3   2   74.39   11.10
  -7  -3  -2  588.54   55.79
  -7  -3  -2  503.15   57.29
  -7  -3  -2  515.25   56.99
  -7  -3  -2  465.35   57.49
  -7  -3  -2  561.44   63.09
  -7  -3  -2  542.95   56.09
   7   3   2  441.16   53.19
   7   3   2  569.84   52.49
   7   3   2  520.15   52.29
   7   3   2  543.95   52.09
  -8  -3  -2   14.90   31.00
  -8  -3  -2   11.10   17.40
  -8  -3  -2   -6.70   13.40
  -8  -3  -2   -3.60   18.60
  -8  -3  -2   11.40   22.90
   8   3   2   -8.20    7.10
   8   3   2   -5.10    7.00
   8   3   2    3.10    3.90
   8   3   2   -1.80    4.60
  -9  -3  -2   90.29   27.40
  -9  -3  -2   59.79   18.90
  -9  -3  -2  116.09   26.10
  -9  -3  -2  136.99   29.40
  -9  -3  -2   52.09   23.00
   9   3   2   61.99   10.30
   9   3   2   61.29   11.90
   9   3   2   57.29    9.10
   9   3   2   70.59    9.50
   9   3   2   78.79    9.40
   9   3   2   80.09   14.60
 -10  -3  -2   13.70   29.50
 -10  -3  -2    9.80   21.10
 -10  -3  -2   17.90   35.40
 -10  -3  -2  -13.00   23.40
 -10  -3  -2   41.90   26.70
  10   3   2    2.90    6.70
  10   3   2    5.90    5.20
  10   3   2    0.90    5.30
  10   3   2   -4.90    9.60
  10   3   2    7.70    9.70
  10   3   2   -2.80    4.80
  10   3   2    0.30    6.20
 -11  -3  -2   -2.90   28.30
 -11  -3  -2   65.79   35.60
 -11  -3  -2   38.30   32.40
 -11  -3  -2   45.80   52.89
  11   3   2   -2.70   10.60
  11   3   2    9.00    7.20
  11   3   2    9.40    7.20
  11   3   2    8.30    8.30
  11   3   2   20.70    8.10
  11   3   2   15.90    6.70
  11  -4  -2   33.50   25.50
  11  -4  -2   13.80   18.00
  11  -4  -2   39.80    9.90
 -11   4   2   38.20   21.20
 -11   4   2   28.20   40.70
 -11   4   2   80.59   16.60
 -11   4   2   78.39   24.90
  10  -4  -2    5.70    7.30
  10  -4  -2   -8.10   15.50
  10  -4  -2  -21.10   29.50
  10  -4  -2   11.30   20.70
 -10   4   2   10.90   16.60
 -10   4   2   -0.40   17.10
 -10   4   2   19.20   35.50
 -10   4   2   16.10   10.70
 -10   4   2  -83.29   43.50
   9  -4  -2  381.96   42.90
  -9   4   2  420.96   40.40
  -9   4   2  296.87   43.70
  -9   4   2  343.47   38.00
  -9   4   2  368.36   42.60
   8  -4  -2   24.60   10.70
   8  -4  -2   -3.10   22.30
   8  -4  -2    3.80   19.10
  -8   4   2   34.80   15.80
  -8   4   2    9.10   27.50
  -8   4   2   10.20    5.80
  -8   4   2    4.90   10.00
  -8   4   2   22.60   27.00
   7  -4  -2   20.90    6.10
   7  -4  -2    0.70   14.40
   7  -4  -2   13.90   18.60
   7  -4  -2    7.90    7.40
  -7   4   2    5.40   17.60
  -7   4   2   15.10    5.80
  -7   4   2   19.40   17.80
  -7   4   2   -1.90    9.00
  -7   4   2   14.30    4.90
  -7   4   2   13.60   13.40
  -7   4   2   13.10   20.50
   6  -4  -2   -3.10    4.60
   6  -4  -2    6.80    5.50
   6  -4  -2   13.00   11.20
   6  -4  -2   -6.40   15.60
   6  -4  -2   14.70    7.60
  -6   4   2    2.90    3.80
  -6   4   2   -7.40    5.10
  -6   4   2    8.80   10.80
  -6   4   2  -12.50   16.50
  -6   4   2    3.10   12.80
  -6   4   2    7.20    3.50
   5  -4  -2  999.00  102.79
   5  -4  -2 1025.00  101.79
   5  -4  -2 1016.20  103.09
  -5   4   2 1018.10  102.39
  -5   4   2 1008.10  101.49
  -5   4   2 1098.09  103.59
   4  -4  -2    3.80    7.70
   4  -4  -2    6.60    4.70
   4  -4  -2   10.60    3.70
   4  -4  -2    3.80    9.40
  -4   4   2   -6.40   11.90
  -4   4   2   10.00    4.30
  -4   4   2    0.00    7.70
  -4   4   2    7.10    2.60
  -4   4   2    3.20    7.60
  -4   4   2    6.50    2.40
   3  -4  -2 2956.60  315.97
   3  -4  -2 3341.77  315.67
  -3   4   2 3358.16  315.57
  -3   4   2 3131.59  315.77
  -3   4   2 3515.85  317.07
  -3   4   2 2669.93  316.07
  -3   4   2 3451.55  315.47
   2  -4  -2   36.10   12.60
   2  -4  -2   34.30    5.00
   2  -4  -2   40.50    4.70
   2  -4  -2   29.00    6.00
  -2   4   2   64.59   11.70
  -2   4   2   25.60    5.60
  -2   4   2   32.70    5.70
  -2   4   2    9.20    9.90
  -2   4   2   37.30    4.40
  -2   4   2   39.10    5.70
  -2   4   2   25.10    4.60
   1  -4  -2 1087.99  103.39
   1  -4  -2  947.71  103.39
  -1   4   2 1044.30  103.19
  -1   4   2 1099.99  103.29
  -1   4   2  981.00  103.09
  -1   4   2 1104.59  103.49
   0  -4  -2 1130.49  100.19
   0  -4  -2 1017.60   99.69
   0  -4  -2  944.91   99.49
   0  -4  -2 1122.39   99.49
   0   4   2  960.40   99.79
   0   4   2  975.40   99.59
   0   4   2  909.01   99.69
  -1  -4  -2  341.57   35.70
  -1  -4  -2  414.96   36.80
  -1  -4  -2  412.76   36.10
   1   4   2  339.77   36.00
   1   4   2  394.16   35.70
   1   4   2  304.57   35.90
   1   4   2  318.27   36.00
  -2  -4  -2  482.55   47.10
  -2  -4  -2  456.35   47.00
   2   4   2  517.05   46.60
   2   4   2  450.85   46.90
   2   4   2  459.05   46.60
   2   4   2  457.25   46.80
  -3  -4  -2    7.10    3.10
  -3  -4  -2   -6.10    6.40
  -3  -4  -2   -3.00    4.20
  -3  -4  -2    5.40    8.40
  -3  -4  -2   -5.80    9.10
  -3  -4  -2   -3.10   17.80
   3   4   2    1.20    2.10
   3   4   2    2.90    2.20
   3   4   2    0.50    2.80
   3   4   2    2.20    4.80
   3   4   2    1.20    1.80
   3   4   2    1.50    2.30
   3   4   2    3.50    2.10
  -4  -4  -2   26.70    9.30
  -4  -4  -2   15.30    9.10
  -4  -4  -2   13.30   17.50
  -4  -4  -2   51.59    9.30
  -4  -4  -2   10.90   17.40
  -4  -4  -2   36.80    7.70
  -4  -4  -2    8.50    9.90
   4   4   2   26.80    4.40
   4   4   2   28.50    5.40
   4   4   2   27.00    4.40
   4   4   2   28.00    5.30
   4   4   2   31.40    5.00
   4   4   2   40.10    6.90
  -5  -4  -2   43.30   19.50
  -5  -4  -2   40.90   11.40
  -5  -4  -2   13.70   22.90
  -5  -4  -2   15.10   13.70
  -5  -4  -2   43.70   10.60
  -5  -4  -2   26.20    8.70
   5   4   2   34.00    5.30
   5   4   2   34.50    5.80
   5   4   2   42.30    6.50
   5   4   2   29.40    5.90
   5   4   2   27.00    4.80
   5   4   2   32.60    5.50
   5   4   2   27.90    5.20
  -6  -4  -2  638.64   66.59
  -6  -4  -2  515.15   67.79
  -6  -4  -2  716.63   67.19
   6   4   2  721.83   63.69
   6   4   2  601.44   63.09
   6   4   2  598.34   63.19
   6   4   2  624.84   62.99
  -7  -4  -2   66.19   19.10
  -7  -4  -2   81.99   20.30
  -7  -4  -2   67.09   22.20
  -7  -4  -2   71.99   18.70
   7   4   2   49.40    9.70
   7   4   2   73.79    9.50
   7   4   2   87.29   11.80
   7   4   2   61.79    8.30
   7   4   2   85.09    9.40
  -8  -4  -2  164.38   24.60
  -8  -4  -2  104.29   28.30
  -8  -4  -2   96.99   24.40
  -8  -4  -2   93.09   26.30
   8   4   2  127.09   14.30
   8   4   2  115.69   13.50
   8   4   2  126.39   14.70
   8   4   2  146.99   16.90
  -9  -4  -2   12.00   28.80
  -9  -4  -2   -8.00   22.30
  -9  -4  -2   -2.50   27.80
   9   4   2   -1.90    6.30
   9   4   2    1.10    4.00
   9   4   2    0.60    4.70
   9   4   2    6.80    8.60
   9   4   2   -3.90    8.50
   9   4   2    2.10    4.10
 -10  -4  -2    0.60   38.00
 -10  -4  -2   25.70   25.90
 -10  -4  -2   50.29   32.20
 -10  -4  -2   89.19   28.80
  10   4   2   32.40    6.30
  10   4   2   25.30    5.70
  10   4   2   12.10    7.00
  10   4   2   12.70    9.80
  10   4   2    4.80    6.70
  10   4   2   19.20    5.60
 -11  -4  -2  315.27   45.30
  11   4   2  219.38   25.40
  11   4   2  248.58   25.50
  11   4   2  227.58   25.40
  11  -5  -2    5.00    8.60
  11  -5  -2  -23.90   26.30
  11  -5  -2  -27.80   18.50
 -11   5   2  -23.70   45.60
 -11   5   2   28.70   22.20
 -11   5   2    4.40   13.20
  10  -5  -2  -29.90   33.40
  10  -5  -2   10.20   21.50
 -10   5   2   17.80   17.90
 -10   5   2    5.60   36.60
 -10   5   2    0.10   10.00
 -10   5   2  -18.20   17.50
   9  -5  -2   12.00   15.50
   9  -5  -2   18.50   30.80
   9  -5  -2  -13.80   18.80
  -9   5   2  -16.50   31.60
  -9   5   2   -7.90   20.10
  -9   5   2  -23.20   34.10
  -9   5   2   50.89   15.90
  -9   5   2   26.30   12.10
  -9   5   2   28.70    7.60
   8  -5  -2  -10.50   22.70
   8  -5  -2  -13.40   21.70
   8  -5  -2    9.00   11.30
  -8   5   2   -4.50    7.60
  -8   5   2   -6.90   25.70
  -8   5   2  -20.90   28.30
  -8   5   2    7.40    5.80
  -8   5   2   -4.70   23.70
  -8   5   2   -3.90   11.30
   7  -5  -2  646.54   61.79
   7  -5  -2  656.53   62.59
   7  -5  -2  619.54   66.39
  -7   5   2  596.04   62.69
  -7   5   2  560.24   61.29
   6  -5  -2   22.00   11.00
   6  -5  -2   28.70   19.60
   6  -5  -2   37.70    7.50
   6  -5  -2   35.50   10.20
   6  -5  -2   43.60    7.10
  -6   5   2   20.50   23.60
  -6   5   2   42.50    6.70
  -6   5   2   22.00   13.90
  -6   5   2   44.70    7.80
  -6   5   2   34.90    5.80
  -6   5   2   39.90   14.60
   5  -5  -2   95.49   15.60
   5  -5  -2  101.69   19.90
   5  -5  -2   94.59   12.10
   5  -5  -2  113.79   17.20
   5  -5  -2  124.99   12.20
  -5   5   2   99.09   18.40
  -5   5   2   98.49   19.30
  -5   5   2   41.70   22.40
  -5   5   2   92.29   10.80
  -5   5   2   88.69   10.70
  -5   5   2  105.09   12.90
   4  -5  -2   22.80    5.00
   4  -5  -2   11.70    4.60
   4  -5  -2    9.70   10.60
   4  -5  -2   18.00    6.70
  -4   5   2   18.50    3.50
  -4   5   2   15.90    5.30
   3  -5  -2   53.79    7.80
   3  -5  -2   38.90    7.20
   3  -5  -2   59.69    8.30
   3  -5  -2   58.89   10.00
  -3   5   2   64.29    8.90
  -3   5   2   48.90    6.20
  -3   5   2   71.59   13.80
  -3   5   2   51.79    6.60
  -3   5   2   58.39    8.60
   2  -5  -2  998.80   95.19
   2  -5  -2 1009.70   95.29
   2  -5  -2  923.21   95.49
   2  -5  -2  917.11   94.99
  -2   5   2  897.21   95.29
  -2   5   2 1040.40   94.89
  -2   5   2  945.01   95.39
  -2   5   2  948.51   94.89
   1  -5  -2  581.94   58.79
   1  -5  -2  603.84   59.29
   1  -5  -2  573.94   58.89
  -1   5   2  574.54   59.19
  -1   5   2  609.74   59.09
  -1   5   2  604.44   58.89
  -1   5   2  595.94   58.89
   0  -5  -2  861.41   84.09
   0  -5  -2  819.62   84.59
   0  -5  -2  804.92   84.09
   0  -5  -2  850.91   83.79
   0   5   2  917.91   84.39
   0   5   2  886.21   84.19
   0   5   2  805.72   83.99
  -1  -5  -2  100.89   10.50
  -1  -5  -2  107.69   13.80
  -1  -5  -2  103.29   11.40
   1   5   2   83.29   11.30
   1   5   2  111.99   10.70
   1   5   2   86.29   11.70
   1   5   2   95.69   11.30
   1   5   2  106.89   11.40
  -2  -5  -2 5976.60  510.25
  -2  -5  -2 4985.80  509.85
   2   5   2 4656.93  509.85
   2   5   2 5318.47  509.85
   2   5   2 4866.91  509.75
   2   5   2 4878.91  509.95
   2   5   2 5566.64  509.75
  -3  -5  -2   16.80    8.00
  -3  -5  -2    0.30   11.50
  -3  -5  -2    6.90    9.50
  -3  -5  -2   19.20   20.50
  -3  -5  -2    6.60    4.60
   3   5   2   16.00    2.70
   3   5   2   10.20    2.70
   3   5   2   12.30    6.40
   3   5   2   10.70    3.10
   3   5   2   17.60    4.10
   3   5   2   11.30    2.80
  -4  -5  -2 1535.55  168.38
  -4  -5  -2 1688.03  164.08
  -4  -5  -2 1692.73  163.58
   4   5   2 1589.04  162.68
   4   5   2 1583.84  162.78
   4   5   2 1561.24  163.28
   4   5   2 1803.52  162.58
   4   5   2 1907.01  163.28
   4   5   2 1468.25  162.38
  -5  -5  -2  425.76   39.90
  -5  -5  -2  348.07   49.00
  -5  -5  -2  325.97   42.20
   5   5   2  323.07   36.60
   5   5   2  406.66   36.80
   5   5   2  393.86   37.80
   5   5   2  345.87   36.60
   5   5   2  352.86   36.80
  -6  -5  -2  344.57   41.50
  -6  -5  -2  250.87   35.70
  -6  -5  -2  264.07   34.90
  -6  -5  -2  298.67   40.00
   6   5   2  280.17   29.40
   6   5   2  304.67   29.60
   6   5   2  296.47   30.30
   6   5   2  276.87   29.60
   6   5   2  308.57   29.90
  -7  -5  -2   27.90   17.10
  -7  -5  -2   69.89   21.40
   7   5   2   67.99    8.80
   7   5   2   54.49    8.10
   7   5   2   44.40    6.50
   7   5   2   46.40    8.50
   7   5   2   68.59   10.20
  -8  -5  -2  288.67   39.70
  -8  -5  -2  278.47   45.00
  -8  -5  -2  342.87   42.00
   8   5   2  247.08   26.60
   8   5   2  244.48   25.90
   8   5   2  250.27   26.20
  -9  -5  -2  115.19   28.30
  -9  -5  -2  138.89   33.20
  -9  -5  -2   31.90   33.70
  -9  -5  -2   88.09   26.90
   9   5   2   50.69    9.10
   9   5   2   62.79   10.60
   9   5   2   62.79    9.00
   9   5   2   40.10    8.10
   9   5   2   54.79    8.30
 -10  -5  -2  422.16   56.79
 -10  -5  -2  460.55   69.79
  10   5   2  308.97   32.60
  10   5   2  305.47   32.90
  10   5   2  305.27   32.40
  11  -6  -2   25.40   29.10
  11  -6  -2    0.20    8.80
  11  -6  -2  -38.60   21.60
 -11   6   2   -7.40   21.60
 -11   6   2  -28.50   47.50
  10  -6  -2  161.98   28.10
 -10   6   2  101.59   23.30
 -10   6   2  111.39   18.60
 -10   6   2   89.49   48.10
   9  -6  -2   -4.50   21.70
   9  -6  -2    6.30   29.00
   9  -6  -2   29.10   16.90
  -9   6   2   11.50   14.40
  -9   6   2  -20.20   38.90
  -9   6   2    5.80    7.30
  -9   6   2  -13.80   31.50
  -9   6   2   34.40   12.60
   8  -6  -2  -27.60   22.40
   8  -6  -2   12.10   12.20
   8  -6  -2  -16.60   26.30
  -8   6   2   27.20   12.20
  -8   6   2  -41.40   33.10
  -8   6   2   24.10   21.90
  -8   6   2    8.90   11.60
  -8   6   2    1.60   27.40
  -8   6   2    8.00    6.20
   7  -6  -2  153.68   25.00
   7  -6  -2  191.38   30.90
   7  -6  -2  188.68   22.20
   7  -6  -2  126.19   32.90
   7  -6  -2  183.68   22.20
  -7   6   2  158.08   18.60
  -7   6   2   88.39   36.90
  -7   6   2  174.98   21.00
  -7   6   2  194.28   19.10
  -7   6   2  192.08   33.30
   6  -6  -2   77.89   15.40
   6  -6  -2   79.89   14.40
   6  -6  -2   77.09   11.40
   6  -6  -2   92.69   12.50
   6  -6  -2   49.40   21.00
  -6   6   2   74.29   10.20
  -6   6   2   82.19   13.30
  -6   6   2   21.40   25.00
  -6   6   2   99.69   19.10
  -6   6   2  108.39   20.30
  -6   6   2   86.09   10.10
   5  -6  -2   77.29   11.10
   5  -6  -2   52.29   10.90
   5  -6  -2   61.79   18.10
   5  -6  -2   55.59   14.30
   5  -6  -2   50.59    8.90
  -5   6   2   70.19    7.50
  -5   6   2   42.30    9.00
  -5   6   2   -6.80   22.80
  -5   6   2   57.59   13.50
  -5   6   2   34.80   14.90
  -5   6   2   66.29    7.90
   4  -6  -2 1209.88  122.09
   4  -6  -2 1392.46  121.59
   4  -6  -2 1137.09  123.59
   4  -6  -2 1263.17  121.59
  -4   6   2 1158.78  121.19
  -4   6   2 1263.47  122.49
  -4   6   2 1287.37  121.09
  -4   6   2 1093.49  121.69
   3  -6  -2  192.08   21.00
   3  -6  -2  223.18   21.30
   3  -6  -2  198.78   22.30
  -3   6   2  192.38   20.00
  -3   6   2  167.18   20.90
  -3   6   2  180.38   19.70
  -3   6   2  216.48   21.60
   2  -6  -2   -2.70   23.30
   2  -6  -2   21.20    4.50
   2  -6  -2   21.80    4.70
   2  -6  -2   21.40    6.40
   2  -6  -2   19.40    6.40
  -2   6   2   34.50    6.50
  -2   6   2   29.80    5.90
  -2   6   2   29.20    4.40
  -2   6   2   28.80    4.30
  -2   6   2    9.60   12.90
  -2   6   2   32.00   12.40
   1  -6  -2 2164.88  212.78
   1  -6  -2 2109.09  212.78
   1  -6  -2 2201.98  212.68
   1  -6  -2 2106.39  213.08
  -1   6   2 2096.39  212.88
  -1   6   2 2181.48  212.78
  -1   6   2 2203.08  212.78
  -1   6   2 2184.28  213.18
   0  -6  -2 1444.06  146.29
   0  -6  -2 1383.66  145.69
   0  -6  -2 1556.14  145.39
   0  -6  -2 1517.95  145.49
   0   6   2 1552.94  145.99
   0   6   2 1216.48  145.89
   0   6   2 1589.44  145.89
   0   6   2 1530.15  145.59
  -1  -6  -2 1165.48  116.99
  -1  -6  -2 1212.48  117.39
  -1  -6  -2 1194.78  118.09
   1   6   2 1290.57  117.39
   1   6   2 1206.48  117.39
   1   6   2 1286.67  117.09
   1   6   2 1117.69  117.39
   1   6   2 1006.60  117.39
  -2  -6  -2  307.17   31.80
  -2  -6  -2  349.77   33.60
  -2  -6  -2  294.17   31.20
   2   6   2  284.37   31.30
   2   6   2  275.07   31.40
   2   6   2  317.97   31.40
   2   6   2  352.66   31.10
  -3  -6  -2   83.09   12.40
  -3  -6  -2   38.70   23.10
  -3  -6  -2   78.89   16.60
  -3  -6  -2  105.19   15.50
   3   6   2   86.09   10.70
   3   6   2  125.19   15.10
   3   6   2  101.69   10.90
   3   6   2  106.99   11.50
   3   6   2  109.59   10.70
  -4  -6  -2 1024.20  105.59
  -4  -6  -2 1282.87  113.99
  -4  -6  -2  982.10  104.69
   4   6   2  927.91  103.79
   4   6   2 1176.68  104.69
   4   6   2  971.50  103.99
   4   6   2 1074.09  103.69
  -5  -6  -2   47.70   27.90
  -5  -6  -2   -6.80   22.50
  -5  -6  -2    5.00   14.80
  -5  -6  -2   21.80   10.70
  -5  -6  -2   -0.40   11.50
   5   6   2    5.50    3.30
   5   6   2    3.80    6.10
   5   6   2    4.90    3.60
   5   6   2    5.80    3.90
   5   6   2    7.50    3.40
   5   6   2    8.20    2.60
   5   6   2    8.50    3.80
  -6  -6  -2  517.05   52.79
  -6  -6  -2  506.85   51.19
   6   6   2  388.46   46.10
   6   6   2  514.15   46.40
   6   6   2  448.36   46.50
  -7  -6  -2  135.49   28.20
   7   6   2  167.08   16.80
   7   6   2  121.59   15.80
   7   6   2  153.68   16.90
   7   6   2  158.18   16.10
   7   6   2  170.68   16.60
  -8  -6  -2   65.59   30.30
  -8  -6  -2   29.80   23.00
  -8  -6  -2   90.39   25.80
  -8  -6  -2   99.59   32.30
   8   6   2   55.29    8.90
   8   6   2   66.19    9.40
   8   6   2   65.39    8.50
  -9  -6  -2   58.09   28.60
  -9  -6  -2   82.59   39.00
   9   6   2   76.59   10.50
   9   6   2   80.89   12.50
   9   6   2   68.19    9.60
   9   6   2   69.29    9.60
 -10  -6  -2  -28.70   49.20
 -10  -6  -2   78.09   37.70
 -10  -6  -2   51.59   33.50
  10   6   2   21.70    5.80
  11  -7  -2   52.69   33.50
 -11   7   2   92.19   16.70
 -11   7   2  112.89   25.80
 -11   7   2   81.79   57.19
  10  -7  -2  230.58   38.90
 -10   7   2  233.58   57.59
 -10   7   2  211.18   24.40
 -10   7   2   98.89   55.99
 -10   7   2  173.38   31.50
   9  -7  -2  130.09   21.30
   9  -7  -2   19.60   31.10
   9  -7  -2   51.09   31.80
  -9   7   2   81.09   11.30
  -9   7   2  -10.60   45.00
  -9   7   2   61.19   38.90
  -9   7   2   81.19   18.70
   8  -7  -2   73.09   35.10
   8  -7  -2  154.68   31.70
  -8   7   2  141.49   17.00
  -8   7   2  126.79   22.90
  -8   7   2   63.29   43.70
  -8   7   2  187.88   19.70
  -8   7   2  140.89   31.60
   7  -7  -2   19.40   28.70
   7  -7  -2   12.10   10.10
   7  -7  -2   36.40   17.40
   7  -7  -2   47.60   13.60
   7  -7  -2   17.30   14.50
  -7   7   2   38.30    9.30
  -7   7   2   26.80    6.00
  -7   7   2   23.60   20.80
  -7   7   2   29.00   33.90
  -7   7   2   49.70   22.80
  -7   7   2   31.40    6.70
   6  -7  -2  284.47   45.50
   6  -7  -2  276.17   35.10
   6  -7  -2  299.47   33.00
   6  -7  -2  300.87   37.50
   6  -7  -2  298.77   34.00
  -6   7   2  287.97   31.40
  -6   7   2  341.37   31.30
  -6   7   2  357.56   38.40
   5  -7  -2  102.29   15.20
   5  -7  -2   62.49   19.40
   5  -7  -2   73.59   11.60
   5  -7  -2   74.09   11.50
   5  -7  -2   65.19   18.00
  -5   7   2  108.79   19.30
  -5   7   2   84.89   15.10
  -5   7   2   53.89   10.00
  -5   7   2   64.49    9.00
  -5   7   2   67.79    8.60
  -5   7   2   19.60   26.60
   4  -7  -2  543.25   53.99
   4  -7  -2  556.74   56.59
   4  -7  -2  507.75   53.59
   4  -7  -2  504.95   54.19
  -4   7   2  535.85   53.89
  -4   7   2  550.94   52.99
  -4   7   2  577.94   54.69
  -4   7   2  485.15   52.69
   3  -7  -2   95.09   13.20
   3  -7  -2   95.29   12.90
   3  -7  -2  112.09   14.70
   3  -7  -2  117.99   16.10
  -3   7   2  118.59   12.20
  -3   7   2   93.49   11.50
  -3   7   2  104.69   14.50
  -3   7   2  121.09   13.90
   2  -7  -2 2942.91  293.27
   2  -7  -2 2867.31  293.47
   2  -7  -2 3081.29  293.57
   2  -7  -2 3093.39  293.57
  -2   7   2 2763.72  293.67
  -2   7   2 3222.48  293.07
  -2   7   2 2834.52  293.07
   1  -7  -2   23.00    4.40
   1  -7  -2   -9.40   33.50
   1  -7  -2   15.60    4.70
   1  -7  -2   34.10    8.00
   1  -7  -2   17.00    5.10
  -1   7   2   29.40    6.60
  -1   7   2   35.20    7.10
  -1   7   2   15.80   11.70
  -1   7   2   23.20    4.90
  -1   7   2   55.89   16.20
   0  -7  -2   36.10    9.80
   0  -7  -2   21.60   30.60
   0  -7  -2   55.19    6.20
   0  -7  -2   38.80    6.50
   0   7   2   21.20    9.70
   0   7   2   55.89    7.80
   0   7   2   43.40    8.10
   0   7   2   52.09    8.30
   0   7   2   77.09   16.50
  -1  -7  -2    9.20    5.00
  -1  -7  -2   10.10    3.10
  -1  -7  -2   -1.20    7.40
  -1  -7  -2   -2.50   24.90
   1   7   2    2.00    5.90
   1   7   2    9.20    6.80
   1   7   2    6.50    6.00
   1   7   2    7.80    3.90
   1   7   2   23.50   12.50
   1   7   2   20.50    5.40
  -2  -7  -2  125.59   15.10
  -2  -7  -2  119.89   16.30
  -2  -7  -2  137.99   18.20
  -2  -7  -2  110.99   29.40
   2   7   2  145.39   15.70
   2   7   2  167.18   15.10
   2   7   2  121.69   16.10
   2   7   2  168.58   18.20
   2   7   2  155.58   15.80
  -3  -7  -2   12.40   19.80
  -3  -7  -2   27.70    6.40
  -3  -7  -2   20.10   10.50
  -3  -7  -2   25.40   23.90
   3   7   2   29.10    4.40
   3   7   2   17.60    9.40
   3   7   2   20.50    4.80
   3   7   2   31.10    5.50
   3   7   2   31.70    5.20
   3   7   2   26.90    4.70
  -4  -7  -2   17.90   18.80
  -4  -7  -2   55.99    9.60
  -4  -7  -2   77.29   24.10
  -4  -7  -2  131.89   33.80
  -4  -7  -2   47.60   12.40
   4   7   2   48.20    7.60
   4   7   2   45.10    6.50
   4   7   2   36.30    9.30
   4   7   2   46.60    7.70
   4   7   2   51.79    6.70
   4   7   2   35.10    6.90
  -5  -7  -2   19.10   12.10
  -5  -7  -2   47.80   11.90
  -5  -7  -2   48.50   27.20
   5   7   2   47.60    6.90
   5   7   2   39.80    6.30
   5   7   2   33.00    6.60
   5   7   2   27.50    5.10
   5   7   2   37.30    5.60
   5   7   2   38.10    6.00
  -6  -7  -2   69.99   30.60
  -6  -7  -2   68.69   17.30
  -6  -7  -2   32.40   17.10
   6   7   2   40.10    7.00
   6   7   2   49.50    8.10
   6   7   2   34.80    5.90
   6   7   2   41.50    6.20
  -7  -7  -2  497.15   64.49
  -7  -7  -2  499.05   63.39
   7   7   2  531.65   55.19
   7   7   2  549.95   55.09
   7   7   2  610.04   54.89
  -8  -7  -2   28.10   52.79
  -8  -7  -2   -3.10   22.70
  -8  -7  -2   78.69   35.40
  -9  -7  -2  -10.90   42.80
  -9  -7  -2   26.00   29.10
  -9  -7  -2   55.49   37.30
   9   7   2   13.90    6.00
   9   7   2    9.90    4.60
 -10  -7  -2   94.39   60.89
 -10  -7  -2  139.09   47.00
  10  -8  -2   -5.70   26.40
  10  -8  -2  -55.79   30.50
 -10   8   2    0.50    9.70
 -10   8   2    9.90   19.70
 -10   8   2  -79.39   48.40
   9  -8  -2   11.40   19.40
   9  -8  -2  -23.30   29.60
   9  -8  -2  -18.60   33.10
  -9   8   2    0.50   15.80
  -9   8   2  -38.20   35.00
  -9   8   2  -27.70   47.20
  -9   8   2   11.10    7.80
   8  -8  -2  247.18   43.50
   8  -8  -2  259.67   30.80
  -8   8   2  250.07   24.70
  -8   8   2  172.98   29.30
  -8   8   2  109.09   47.30
   7  -8  -2   42.00   18.50
   7  -8  -2   10.10   30.70
   7  -8  -2   -4.30   12.00
   7  -8  -2   -1.90   17.20
   7  -8  -2    0.60   18.60
  -7   8   2   22.30    6.20
  -7   8   2   13.90   19.60
  -7   8   2   18.30    6.20
  -7   8   2  -13.00   38.40
  -7   8   2   19.00   25.50
  -7   8   2   10.00    9.50
   6  -8  -2  283.57   30.90
   6  -8  -2  246.58   36.50
   6  -8  -2  277.17   28.40
   6  -8  -2  294.97   43.20
  -6   8   2  232.08   25.80
  -6   8   2  225.08   29.30
  -6   8   2  235.28   25.60
   5  -8  -2   36.00    8.60
   5  -8  -2   46.20   11.70
   5  -8  -2   26.50   16.00
   5  -8  -2   64.79   11.80
   5  -8  -2    7.10   20.40
  -5   8   2   52.69    7.10
  -5   8   2   68.39   21.20
  -5   8   2   41.50    6.80
  -5   8   2   55.79   10.00
  -5   8   2   56.69   12.70
  -5   8   2    6.70   27.20
   4  -8  -2  152.68   17.80
   4  -8  -2  133.09   16.20
   4  -8  -2  117.39   19.20
   4  -8  -2  126.49   22.10
  -4   8   2  118.69   14.80
  -4   8   2  163.98   18.10
  -4   8   2  115.99   16.90
  -4   8   2  137.09   14.40
   3  -8  -2  169.08   20.30
   3  -8  -2  170.08   22.40
   3  -8  -2  182.58   22.40
   3  -8  -2  186.08   20.60
  -3   8   2  156.68   22.10
  -3   8   2  189.48   19.40
  -3   8   2  189.78   20.90
  -3   8   2  194.68   19.00
   2  -8  -2  165.68   15.90
   2  -8  -2  137.59   16.60
   2  -8  -2  107.69   17.50
   2  -8  -2  116.39   14.90
  -2   8   2  142.09   15.10
  -2   8   2  101.99   16.80
  -2   8   2  120.49   15.00
   1  -8  -2  426.66   39.90
   1  -8  -2  383.36   42.30
   1  -8  -2  377.46   39.70
   1  -8  -2  393.96   40.20
  -1   8   2  336.07   41.30
  -1   8   2  446.06   40.10
  -1   8   2  370.26   44.50
   0  -8  -2  395.76   45.00
   0  -8  -2  437.36   45.80
   0  -8  -2  435.26   47.40
   0  -8  -2  465.95   45.30
   0   8   2  500.75   48.00
   0   8   2  487.15   46.60
   0   8   2  464.45   46.00
  -1  -8  -2 1287.57  139.79
  -1  -8  -2 1289.97  140.69
  -1  -8  -2 1465.15  139.39
   1   8   2 1607.84  139.59
   1   8   2 1422.56  139.69
   1   8   2 1397.86  139.89
   1   8   2 1390.56  140.19
  -2  -8  -2    6.20   12.80
  -2  -8  -2   17.40   10.30
  -2  -8  -2   22.40    6.70
  -2  -8  -2    9.40   26.50
   2   8   2   13.80    5.10
   2   8   2    9.20    5.40
   2   8   2   21.20    6.00
   2   8   2   12.60   12.50
   2   8   2   14.00    6.50
  -3  -8  -2 1022.90  114.89
   3   8   2 1237.78  114.29
   3   8   2 1092.49  114.29
   3   8   2 1117.39  114.39
   3   8   2 1190.78  114.49
   3   8   2 1254.67  113.99
  -4  -8  -2   38.70    9.60
  -4  -8  -2   68.19   30.90
  -4  -8  -2   12.90   11.10
   4   8   2   34.10    6.20
   4   8   2   27.40    4.90
   4   8   2   44.80    6.50
   4   8   2   28.70    5.80
  -5  -8  -2  566.54   62.39
  -5  -8  -2  580.74   61.69
   5   8   2  551.64   58.99
   5   8   2  601.14   59.39
   5   8   2  609.14   59.49
   5   8   2  643.84   59.29
  -6  -8  -2  106.69   34.70
  -6  -8  -2   21.50   17.20
   6   8   2   16.70    5.50
   6   8   2   22.90    5.80
   6   8   2   24.70    4.30
  -7  -8  -2   10.30   18.70
  -7  -8  -2   22.50   36.20
   7   8   2    0.10    4.30
   7   8   2    3.00    5.70
   7   8   2   11.50    5.70
   7   8   2    1.30    3.40
  -8  -8  -2   -0.20   35.50
  -8  -8  -2   29.60   23.90
  -8  -8  -2   54.49   35.10
   8   8   2   10.50    6.60
   8   8   2    7.30    4.00
   8   8   2   13.90    6.00
   8   8   2   12.10    4.50
  -9  -8  -2  158.18   52.59
  -9  -8  -2  208.98   37.80
   9   8   2  129.19   15.40
   9   8   2  135.29   15.20
   9   8   2  130.99   16.20
  10  -9  -2  -24.10   47.10
  10  -9  -2  -14.50   32.00
 -10   9   2  -56.59   62.59
 -10   9   2   -0.30   20.90
   9  -9  -2   21.50   34.60
   9  -9  -2   18.20   21.70
  -9   9   2   59.69   30.60
   8  -9  -2   52.29   26.80
   8  -9  -2   48.50   17.10
   8  -9  -2   37.60   34.30
  -8   9   2   52.49   14.90
  -8   9   2   40.60    8.60
  -8   9   2   12.90   50.59
  -8   9   2   99.19   29.30
   7  -9  -2   37.30   23.70
   7  -9  -2   87.59   31.30
   7  -9  -2   91.09   16.00
   7  -9  -2   79.59   21.80
  -7   9   2  100.99   23.40
  -7   9   2   75.79   13.90
  -7   9   2  -20.80   43.30
  -7   9   2   78.99   11.60
   6  -9  -2   47.20   12.00
   6  -9  -2    3.50   25.60
   6  -9  -2   64.09   15.40
   6  -9  -2   55.59   17.30
   6  -9  -2   57.69   23.10
  -6   9   2   75.19   16.70
  -6   9   2   -5.70   38.20
  -6   9   2   85.99   27.20
  -6   9   2   43.80    8.70
  -6   9   2   52.39    7.90
   5  -9  -2  400.66   58.19
   5  -9  -2  370.86   47.00
   5  -9  -2  483.65   51.29
   5  -9  -2  445.66   45.30
   5  -9  -2  405.56   46.30
  -5   9   2  472.35   43.10
  -5   9   2  407.26   43.40
   4  -9  -2  388.66   37.40
   4  -9  -2  356.36   38.10
   4  -9  -2  340.67   40.90
   4  -9  -2  425.46   41.00
  -4   9   2  337.57   38.60
  -4   9   2  343.67   35.90
  -4   9   2  316.17   36.20
   3  -9  -2  243.98   24.60
   3  -9  -2  209.08   24.20
   3  -9  -2  195.48   27.30
  -3   9   2  252.37   23.20
  -3   9   2  185.18   23.50
  -3   9   2  183.18   25.80
  -3   9   2  245.58   25.10
   2  -9  -2   96.79   12.30
   2  -9  -2   62.69   57.09
   2  -9  -2  109.29   14.00
   2  -9  -2  101.99   12.50
   2  -9  -2   58.89   15.30
  -2   9   2   80.79   22.00
  -2   9   2   95.89   12.50
  -2   9   2   93.29   12.70
  -2   9   2   66.19   14.00
   1  -9  -2  382.86   39.30
   1  -9  -2  325.77   41.50
   1  -9  -2  346.77   39.80
   1  -9  -2  399.86   39.40
  -1   9   2  405.06   40.00
  -1   9   2  425.06   41.60
  -1   9   2  446.46   45.70
   0  -9  -2 2032.20  204.68
   0  -9  -2 1872.91  205.28
   0  -9  -2 1943.11  204.08
   0   9   2 2267.47  204.58
   0   9   2 2038.90  204.88
   0   9   2 2258.87  205.68
  -1  -9  -2  305.47   32.50
  -1  -9  -2  286.07   35.90
  -1  -9  -2  275.07   33.40
   1   9   2  344.37   33.20
   1   9   2  342.27   34.00
   1   9   2  387.06   35.60
  -2  -9  -2  244.48   30.30
  -2  -9  -2  226.88   28.60
  -2  -9  -2  208.78   35.30
   2   9   2  302.87   27.50
   2   9   2  263.07   28.90
   2   9   2  294.37   27.80
   2   9   2  254.67   28.00
   3   9   2  411.56   41.10
   3   9   2  415.16   40.80
   3   9   2  367.86   41.10
   3   9   2  411.46   40.80
   3   9   2  404.26   41.30
  -4  -9  -2   -2.00    8.40
   4   9   2   -1.40    5.90
   4   9   2    8.40    5.40
   4   9   2   -2.40    5.40
  -5  -9  -2  128.59   19.00
   5   9   2  117.19   15.50
   5   9   2  127.19   14.00
   5   9   2  139.09   14.80
  -6  -9  -2  151.68   41.40
  -6  -9  -2   60.49   21.00
  -6  -9  -2   44.20   18.70
   6   9   2   39.20    7.50
   6   9   2   31.00    6.40
   6   9   2   34.10    6.40
   6   9   2   28.90    7.20
  -7  -9  -2  280.27   45.50
  -7  -9  -2  227.78   33.90
   7   9   2  166.88   20.50
   7   9   2  200.68   21.20
   7   9   2  204.68   22.00
   7   9   2  218.68   21.90
  -8  -9  -2   54.79   39.90
  -8  -9  -2   34.70   44.70
  -8  -9  -2   50.79   27.00
   8   9   2   31.20    5.60
   8   9   2   26.30    6.10
   8   9   2   33.10    7.20
  -9  -9  -2   27.00   34.00
  -9  -9  -2  119.39   49.80
  -9  -9  -2   44.20   56.39
   9   9   2    2.60    6.80
   9   9   2   15.10    5.40
   9   9   2   19.70    5.50
   9 -10  -2  260.07   42.00
   9 -10  -2  202.78   50.49
  -9  10   2  269.37   35.50
  -9  10   2   39.50   69.29
  -9  10   2  220.48   26.40
   8 -10  -2   89.79   28.50
   8 -10  -2   72.39   19.90
   8 -10  -2  100.79   43.70
  -8  10   2   41.50   17.40
  -8  10   2   68.49   11.10
  -8  10   2  149.69   30.80
  -8  10   2   21.40   57.79
   7 -10  -2   69.79   16.40
   7 -10  -2   70.09   20.90
   7 -10  -2   90.49   34.10
  -7  10   2  -11.40   49.00
  -7  10   2   39.50    8.60
  -7  10   2   51.89   13.00
   6 -10  -2  335.77   42.50
   6 -10  -2  319.77   34.10
   6 -10  -2  374.86   46.50
   6 -10  -2  332.47   37.70
  -6  10   2  252.97   31.00
  -6  10   2  266.77   34.90
   5 -10  -2   88.59   37.90
   5 -10  -2   99.59   18.00
   5 -10  -2  147.29   27.70
   5 -10  -2  105.49   19.30
   5 -10  -2  105.59   20.40
  -5  10   2  106.39   12.70
  -5  10   2  104.99   13.90
  -5  10   2   90.69   16.00
   4 -10  -2   41.80   10.50
   4 -10  -2   51.69   15.10
   4 -10  -2   21.50   10.70
   4 -10  -2    9.00   46.40
   4 -10  -2   46.70   14.00
  -4  10   2   13.90   11.80
  -4  10   2   36.40    9.80
  -4  10   2  -52.49   29.60
  -4  10   2   32.10    7.20
  -4  10   2   78.09   27.90
   3 -10  -2 1003.30   97.79
   3 -10  -2  951.40   97.19
   3 -10  -2 1017.90   97.49
   3 -10  -2  962.80   98.79
  -3  10   2  997.70   96.39
  -3  10   2  960.00   96.69
  -3  10   2  895.11   98.39
   2 -10  -2  449.86   43.30
   2 -10  -2  411.26   42.60
   2 -10  -2  374.16   45.20
   2 -10  -2  352.86   43.10
  -2  10   2  461.85   43.00
  -2  10   2  474.55   53.89
  -2  10   2  376.06   45.10
  -2  10   2  431.66   42.90
   1 -10  -2  227.98   83.89
   1 -10  -2  364.06   41.80
   1 -10  -2  456.25   42.00
   1 -10  -2  361.46   45.00
   1 -10  -2  425.16   42.90
  -1  10   2  443.66   44.70
  -1  10   2  446.06   42.50
   0 -10  -2   45.40    8.30
   0 -10  -2   32.10   12.90
   0 -10  -2   37.30   56.89
   0 -10  -2   32.20    9.10
   0  10   2   68.19   25.50
   0  10   2   35.90   10.50
   0  10   2   59.69   14.40
  -1 -10  -2    8.20   10.60
  -1 -10  -2    7.50    4.80
  -1 -10  -2    5.90    7.50
   1  10   2    5.80    6.60
   1  10   2    8.40    7.20
   1  10   2    4.40   20.70
   1  10   2   12.60   10.80
   1  10   2    4.70    7.50
  -2 -10  -2   25.60   41.90
  -2 -10  -2   97.39   18.40
  -2 -10  -2   89.89   16.90
   2  10   2  148.79   15.50
   2  10   2  100.99   15.70
   2  10   2  124.59   18.50
   2  10   2  125.19   14.40
   2  10   2  189.98   31.10
  -3 -10  -2   63.89   15.80
  -3 -10  -2   42.90   14.80
  -3 -10  -2   82.49   34.50
  -3 -10  -2   30.00   11.30
   3  10   2   52.99    9.30
   3  10   2   61.09   10.10
   3  10   2   66.39    8.90
   3  10   2   62.49    9.70
  -4 -10  -2  118.49   22.10
   4  10   2  136.19   17.10
   4  10   2  124.79   15.00
   4  10   2  126.69   16.50
   4  10   2  148.79   16.20
  -5 -10  -2  -20.80   16.20
  -5 -10  -2   67.59   43.40
  -5 -10  -2   -1.40   12.50
   5  10   2    9.70    7.00
   5  10   2    4.10    4.20
   5  10   2    5.60    8.80
   5  10   2    2.30    5.40
  -6 -10  -2   16.10   20.20
  -6 -10  -2    3.60   19.40
  -6 -10  -2   58.19   44.70
   6  10   2    4.70    4.10
   6  10   2   -3.90    5.10
   6  10   2   -6.30    6.90
  -7 -10  -2  105.29   26.50
  -7 -10  -2  161.78   32.10
   7  10   2   88.29   14.50
   7  10   2   84.89   14.40
  -8 -10  -2   59.49   43.60
  -8 -10  -2   36.60   29.80
   8  10   2   24.40   13.10
   8  10   2    9.50    5.70
   8  10   2   13.50    4.80
   9 -11  -2   26.60   27.00
   9 -11  -2    4.90   41.50
  -9  11   2   -7.40   19.00
  -9  11   2 -119.19   67.49
  -9  11   2   15.30   10.30
   8 -11  -2    7.00   29.00
   8 -11  -2   -0.40   19.60
  -8  11   2    5.30   14.80
  -8  11   2   22.10    8.50
  -8  11   2  -73.19   64.09
   7 -11  -2  213.88   40.70
   7 -11  -2  172.68   37.60
   7 -11  -2  183.58   29.10
  -7  11   2  162.78   25.70
  -7  11   2   -3.00   56.59
  -7  11   2  151.58   20.00
  -7  11   2  228.88   32.30
   6 -11  -2    8.40   25.90
   6 -11  -2    0.90   15.00
   6 -11  -2   23.90   23.90
   6 -11  -2   -4.50   11.70
  -6  11   2  -12.40    6.40
  -6  11   2  -52.89   44.00
  -6  11   2  -19.50   13.90
  -6  11   2   -8.40   13.50
   5 -11  -2  144.19   24.20
   5 -11  -2  162.28   29.20
   5 -11  -2  159.08   27.30
   5 -11  -2  143.39   23.20
  -5  11   2  171.78   24.40
  -5  11   2  159.28   17.60
  -5  11   2  140.49   18.60
  -5  11   2  158.58   46.00
   4 -11  -2  154.08   25.20
   4 -11  -2  170.18   31.20
   4 -11  -2  193.88   22.90
   4 -11  -2  150.98   25.00
   4 -11  -2   70.79   64.19
  -4  11   2  199.98   21.70
  -4  11   2  160.38   19.30
  -4  11   2  137.79   18.20
   3 -11  -2   45.60   10.80
   3 -11  -2   62.99   12.90
   3 -11  -2   53.79   17.00
   3 -11  -2   59.19   12.40
   3 -11  -2  110.59   84.39
  -3  11   2  120.19   34.30
  -3  11   2   28.50   15.40
  -3  11   2   56.69    9.00
  -3  11   2   64.59   30.10
   2 -11  -2  304.97   37.60
   2 -11  -2  324.57   34.20
   2 -11  -2  319.37   33.80
   2 -11  -2  311.67   33.20
   2 -11  -2  288.57   99.69
  -2  11   2  282.07   36.80
  -2  11   2  303.57   34.10
   1 -11  -2   14.80    9.10
   1 -11  -2    7.80   12.60
   1 -11  -2   63.69   84.59
   1 -11  -2   20.20    6.60
   1 -11  -2   11.30    6.40
  -1  11   2   24.90   32.10
  -1  11   2   30.60   20.00
  -1  11   2   10.00   10.30
  -1  11   2   14.90    9.80
   0 -11  -2   25.40    9.60
   0 -11  -2   18.90   14.30
   0 -11  -2   34.00    5.70
   0  11   2   47.20   11.00
   0  11   2   41.90   10.40
   0  11   2   99.09   30.40
   0  11   2   37.20   12.80
   0  11   2   71.49   17.10
  -1 -11  -2   30.10   57.79
  -1 -11  -2   15.90    8.50
  -1 -11  -2   16.20    6.00
   1  11   2   34.50   20.80
   1  11   2   20.70    7.90
   1  11   2   20.80   32.20
  -2 -11  -2  184.28   27.20
  -2 -11  -2  206.28   29.90
   2  11   2  258.57   25.60
   2  11   2  256.17   26.10
  -3 -11  -2   33.70   32.00
  -3 -11  -2  -10.80    8.90
  -3 -11  -2   -8.10   13.90
   3  11   2   -2.50    5.90
   3  11   2   -0.40    7.60
   3  11   2    3.80    9.50
   3  11   2    1.60    6.50
  -4 -11  -2   54.29   15.70
   4  11   2  100.89   15.30
   4  11   2  122.09   13.90
   4  11   2   86.59   14.30
   4  11   2   87.09   12.30
  -5 -11  -2  156.68   30.70
  -5 -11  -2  143.99   29.60
   5  11   2  210.68   23.60
   5  11   2  198.58   21.90
   5  11   2  257.57   23.20
  -6 -11  -2   10.00   22.10
  -6 -11  -2   -0.50   20.30
  -6 -11  -2   84.49   51.29
   6  11   2    3.60    4.20
   6  11   2    8.30    7.10
   6  11   2   12.00    8.10
  -7 -11  -2  -19.00   26.00
  -7 -11  -2   14.90   50.59
  -7 -11  -2   43.00   32.00
   7  11   2    4.60    4.80
   7  11   2   19.10    8.90
   7  11   2   11.10    6.40
   8 -12  -2   16.80   23.00
   8 -12  -2  -17.30   43.40
  -8  12   2   -8.20   18.40
  -8  12   2   -5.40   67.79
   7 -12  -2   -0.40   33.50
   7 -12  -2    5.60   29.00
   7 -12  -2   23.10   22.00
  -7  12   2   -1.50   17.30
  -7  12   2   31.40   60.19
  -7  12   2   16.50    8.60
   6 -12  -2   44.00   18.20
   6 -12  -2   57.69   16.90
   6 -12  -2   35.70   32.60
   6 -12  -2   35.50   25.30
  -6  12   2   18.80   52.29
  -6  12   2    5.90   17.10
  -6  12   2   44.70    9.20
   5 -12  -2  197.98   31.80
   5 -12  -2  188.08   26.70
   5 -12  -2  187.58   33.40
   5 -12  -2  180.98   26.60
  -5  12   2  157.78   20.20
  -5  12   2  114.99   23.70
   4 -12  -2  331.67   48.60
   4 -12  -2  403.86   41.60
   4 -12  -2  416.26   42.00
  -4  12   2  362.76   39.40
  -4  12   2  321.47   44.40
   3 -12  -2  142.39   22.50
   3 -12  -2   91.09   23.00
   3 -12  -2   74.49  105.89
   3 -12  -2  111.29   19.60
   3 -12  -2  133.39   20.90
  -3  12   2  202.28   45.10
  -3  12   2   73.69   21.50
  -3  12   2  162.18   18.20
  -3  12   2  130.19   18.20
   2 -12  -2   18.30    9.70
   2 -12  -2   20.60   18.50
   2 -12  -2  102.69  115.89
   2 -12  -2   11.60   10.20
   2 -12  -2    3.70    8.90
  -2  12   2    9.90    9.60
  -2  12   2   15.10   15.30
  -2  12   2   57.89   27.10
  -2  12   2   20.10   38.60
  -2  12   2   32.80   10.00
   1 -12  -2  342.97   40.40
   1 -12  -2  445.16   40.30
   1 -12  -2  460.65  113.69
   1 -12  -2  404.76   42.50
   1 -12  -2  331.37   46.70
  -1  12   2  392.46   44.20
   0 -12  -2   59.09    9.60
   0 -12  -2   25.60   17.10
   0 -12  -2   28.40   11.00
   0 -12  -2  137.59   92.79
   0  12   2  106.49   16.30
   0  12   2   59.89   11.30
   0  12   2   70.09   14.40
  -1 -12  -2  326.67   39.40
  -1 -12  -2  290.27   32.30
   1  12   2  320.17   34.40
  -2 -12  -2   54.09   18.10
  -2 -12  -2   73.59   14.60
   2  12   2   82.49   12.40
   2  12   2   82.89   12.40
   2  12   2   54.49   11.90
  -3 -12  -2   97.89   22.70
   3  12   2  122.19   16.70
   3  12   2  126.69   15.90
   3  12   2  129.59   17.90
  -4 -12  -2   -1.10   14.30
  -4 -12  -2   51.39   20.40
   4  12   2   30.60    7.50
   4  12   2   19.30    8.50
   4  12   2   10.60    8.90
  -5 -12  -2   60.19   18.40
  -5 -12  -2   30.20   21.90
   5  12   2   36.20   10.70
   5  12   2   62.49    8.70
  -6 -12  -2   23.50   23.40
  -6 -12  -2   -8.30   23.70
   6  12   2   32.10    6.70
   6  12   2   32.50   10.40
   6  12   2   36.60    8.50
  -7 -12  -2   52.39   30.50
   7  12   2   34.70    6.60
   7  12   2   35.40    7.90
   7  12   2   32.10    9.40
   7 -13  -2  106.49   26.60
   7 -13  -2  175.08   43.00
  -7  13   2  140.89   22.60
  -7  13   2   87.79   25.10
   6 -13  -2   40.00   40.90
   6 -13  -2   58.99   28.70
   6 -13  -2   65.19   21.80
   6 -13  -2  103.59   22.30
  -6  13   2   89.39   12.70
  -6  13   2   45.60   21.70
  -6  13   2  196.48   58.69
   5 -13  -2   39.40   30.30
   5 -13  -2   35.90   21.70
   5 -13  -2   48.50   17.50
   5 -13  -2   45.90   17.60
  -5  13   2  161.58   50.29
  -5  13   2  -14.10   17.50
  -5  13   2   21.80    9.40
   4 -13  -2   -6.10   15.00
   4 -13  -2   -9.50   13.30
   4 -13  -2  -31.70   26.70
  -4  13   2   -2.50    8.90
  -4  13   2   14.50   39.60
  -4  13   2  -18.10   17.40
   3 -13  -2   80.89   41.00
   3 -13  -2  165.98   22.90
   3 -13  -2  149.99   25.40
   3 -13  -2  139.99   23.60
  -3  13   2  140.59   21.40
  -3  13   2  127.79   24.80
  -3  13   2  170.18   20.40
   2 -13  -2  179.68   31.80
   2 -13  -2  217.48   29.60
   2 -13  -2  174.88  145.29
   2 -13  -2  211.48   26.70
  -2  13   2  398.76   75.59
  -2  13   2  185.08   33.20
  -2  13   2  263.27   27.70
   1 -13  -2   15.50   12.70
   1 -13  -2   15.70   18.40
   1 -13  -2   28.20    9.60
  -1  13   2   52.69   13.00
  -1  13   2   24.00   11.00
  -1  13   2    6.30   13.60
  -1  13   2   82.29   25.10
   0 -13  -2   -1.80   18.80
   0 -13  -2   -5.50   11.60
   0 -13  -2    4.70    8.60
   0  13   2   -8.90    9.80
   0  13   2   11.60   13.10
   0  13   2   21.90   20.00
  -1 -13  -2   36.40   15.10
  -1 -13  -2   52.99   21.70
   1  13   2   86.49   13.10
   1  13   2  120.09   15.70
   1  13   2   74.99   14.90
  -2 -13  -2   38.30   15.00
  -2 -13  -2   27.20   20.30
   2  13   2  113.49   17.00
   2  13   2   59.69   13.20
   2  13   2   72.79   12.40
   2  13   2   87.99   13.90
  -3 -13  -2   29.70   20.80
  -3 -13  -2   42.20   15.10
   3  13   2   52.79   10.70
   3  13   2   22.90   11.50
   3  13   2   29.20    9.10
  -4 -13  -2  -10.40   17.20
  -4 -13  -2   -0.40   16.20
   4  13   2    1.90    8.00
   4  13   2   10.30    8.80
   4  13   2   -7.90    9.30
  -5 -13  -2  148.49   31.00
   5  13   2  122.79   19.20
   5  13   2  157.68   17.80
   5  13   2  145.39   22.40
  -6 -13  -2    3.00   27.00
  -6 -13  -2   40.40   26.70
   6  13   2   16.30   10.10
   6  13   2    7.80    8.30
   6  13   2   17.10    6.30
   6 -14  -2   23.10   48.20
   6 -14  -2    6.70   21.40
   6 -14  -2    7.20   27.80
  -6  14   2   -3.40   10.40
  -6  14   2  -45.40   19.10
  -6  14   2    2.10   57.69
   5 -14  -2   58.59   21.70
   5 -14  -2   92.89   24.40
   5 -14  -2   59.39   20.50
   5 -14  -2    2.90   37.30
  -5  14   2   61.89   15.00
  -5  14   2   40.50   22.80
  -5  14   2  199.68   52.69
   4 -14  -2    4.50   18.50
   4 -14  -2   50.49   17.90
   4 -14  -2  -10.10   30.00
   4 -14  -2   62.99   18.90
  -4  14   2   35.80   12.30
  -4  14   2   11.70   18.90
  -4  14   2  126.79   45.70
   3 -14  -2  -11.80   25.70
   3 -14  -2   15.80   15.40
   3 -14  -2    4.40   24.70
   3 -14  -2   -9.60   13.90
  -3  14   2   28.80   20.20
  -3  14   2    1.10   11.80
  -3  14   2   27.00   36.70
   2 -14  -2   78.69   19.00
   2 -14  -2   27.60   25.70
  -2  14   2  173.58   33.70
  -2  14   2   98.19   16.30
  -2  14   2  101.29   16.50
  -2  14   2   40.80   21.20
   1 -14  -2    5.30   11.10
   1 -14  -2   -3.30   12.40
   1 -14  -2    3.40   22.50
  -1  14   2   20.70   25.90
  -1  14   2   -6.30   15.80
  -1  14   2   -8.90   11.80
  -1  14   2  -16.30   15.80
   0 -14  -2   40.40   15.30
   0 -14  -2  -10.80   21.60
   0  14   2  -10.50   14.50
   0  14   2   31.90   22.30
   0  14   2   26.70   11.40
   0  14   2   15.70   13.70
  -1 -14  -2   34.50   23.20
  -1 -14  -2   23.20   14.90
   1  14   2   42.90   11.40
   1  14   2   65.99   14.80
   1  14   2   16.50   14.30
  -2 -14  -2    3.20   14.70
  -2 -14  -2   11.60   22.30
   2  14   2   -8.50   11.60
   2  14   2   -0.10   12.80
   2  14   2   17.10   12.40
  -3 -14  -2   -5.40   36.50
   3  14   2   35.20   22.00
   3  14   2   15.70   11.30
   3  14   2   14.50   10.10
  -4 -14  -2  -14.50   18.60
  -4 -14  -2    4.90   23.10
   4  14   2   31.90   10.10
   4  14   2   19.90    9.40
   4  14   2  -15.20   12.00
   5 -15  -2   61.39   25.30
   5 -15  -2   56.89   23.60
   5 -15  -2   36.00   45.80
  -5  15   2  146.79   55.39
  -5  15   2   51.79   25.10
  -5  15   2   24.40   14.00
   4 -15  -2   28.90   36.90
   4 -15  -2   74.59   22.10
   4 -15  -2  111.39   23.10
  -4  15   2   87.39   16.80
  -4  15   2   86.29   26.00
   3 -15  -2   12.80   18.10
   3 -15  -2   -8.10   30.10
   3 -15  -2   -8.60   17.00
  -3  15   2   24.20   14.20
  -3  15   2   -4.50   21.10
  -3  15   2  -32.80   37.70
   2 -15  -2    5.50   18.10
   2 -15  -2   -8.70   18.10
   2 -15  -2    5.30   27.50
  -2  15   2   16.30   20.00
  -2  15   2    3.50   13.40
  -2  15   2  -14.20   33.40
   1 -15  -2   28.60   18.30
   1 -15  -2   31.00   27.30
  -1  15   2   60.99   16.80
  -1  15   2   36.30   14.40
  -1  15   2  100.99   28.90
  -1  15   2   26.30   16.60
   0 -15  -2   24.10   27.60
   0 -15  -2   91.49   21.00
   0  15   2   97.99   18.40
   0  15   2  112.59   16.60
   0  15   2   80.99   19.40
  -1 -15  -2    5.20   25.90
  -1 -15  -2    6.70   17.20
   1  15   2   15.30   15.10
   1  15   2    1.90   11.60
   1  15   2   -1.70   14.40
  -2 -15  -2   67.49   27.50
  -2 -15  -2   36.00   19.00
   2  15   2   56.09   16.90
   2  15   2   73.09   13.90
   2  15   2   73.29   19.50
  -3 -15  -2   -1.90   19.50
  -3 -15  -2   18.10   26.10
   3  15   2   14.30   14.60
   3  15   2   29.80   14.30
   3  15   2   14.70   11.40
   2 -16  -2   31.10   20.30
   1 -16  -2   -0.20   19.80
   1 -16  -2  -13.10   31.10
  -1  16   2   -0.90   19.70
  -1  16   2    2.20   15.00
   0 -16  -2   -2.80   20.10
   0  16   2   43.70   14.60
   0  16   2   15.10   19.00
   3  16  -3   97.89   15.10
   3  16  -3  103.19   16.80
  -3 -16   3   93.99   22.50
   2  16  -3   31.80   13.10
   2  16  -3   55.89   12.60
   2  16  -3   63.99   21.30
   2  16  -3   38.30   11.50
  -2 -16   3   39.70   18.70
  -2 -16   3   22.70   25.00
   1  16  -3   89.69   14.70
   1  16  -3   91.59   25.40
   1  16  -3  139.19   20.70
   1  16  -3   49.20   16.40
  -1 -16   3   57.79   25.30
  -1 -16   3   83.69   19.60
   0  16  -3   14.80   14.50
   0  16  -3   27.10   25.70
   0  16  -3  -11.70   14.90
   0 -16   3    9.00   24.20
   0 -16   3    0.70   15.60
  -1  16  -3    8.80   16.10
  -1  16  -3   -1.20   13.00
  -1  16  -3   31.00   30.10
   1 -16   3  -11.70   25.10
   1 -16   3   -5.80   17.80
  -2  16  -3   48.50   37.50
  -2  16  -3   21.60   13.20
  -2  16  -3    2.50   17.40
   2 -16   3   20.00   18.60
   2 -16   3  -21.40   37.80
  -3  16  -3    1.40   18.20
  -3  16  -3   17.10   12.10
  -3  16  -3   -1.90   43.00
   3 -16   3   -6.80   16.80
   3 -16   3    1.00   48.50
  -4  16  -3  118.89   24.50
  -4  16  -3  174.98   32.70
  -4  16  -3  118.79   19.60
   4 -16   3  107.39   25.90
   4 -16   3  110.39   23.30
   4 -16   3  185.78   34.50
   4 -16   3   95.59   30.20
   4  15  -3   16.30    8.60
   4  15  -3   17.90   11.10
   4  15  -3   21.30    9.20
   4  15  -3   17.90   15.20
  -4 -15   3    4.90   17.60
  -4 -15   3   -8.10   22.40
  -4 -15   3   45.00   45.80
   3  15  -3   -7.70   10.30
   3  15  -3   -0.50    9.00
   3  15  -3    7.90    8.40
   3  15  -3  -11.50   16.30
  -3 -15   3  -18.50   19.60
  -3 -15   3  -11.80   15.20
  -3 -15   3  -24.70   34.00
   2  15  -3   77.29   18.90
   2  15  -3   47.40   12.30
   2  15  -3   49.30   10.80
  -2 -15   3   41.10   15.90
  -2 -15   3   93.89   21.90
   1  15  -3   69.19   20.20
   1  15  -3   69.19   11.70
   1  15  -3   49.00   15.40
   1  15  -3   52.59   11.30
  -1 -15   3   23.90   20.70
  -1 -15   3   26.10   15.20
   0  15  -3   43.20   11.50
   0  15  -3   47.40   12.60
   0  15  -3   49.90   21.90
   0 -15   3   15.70   20.50
   0 -15   3   14.00   15.10
  -1  15  -3   48.60   12.70
  -1  15  -3   83.49   26.50
   1 -15   3   50.29   20.40
   1 -15   3   51.29   16.60
  -2  15  -3  121.09   33.10
  -2  15  -3   77.09   19.90
  -2  15  -3   71.49   14.00
   2 -15   3   73.59   18.60
   2 -15   3   80.49   22.50
   2 -15   3   65.49   18.60
  -3  15  -3   88.89   38.40
  -3  15  -3   32.80   11.50
  -3  15  -3   72.29   14.60
  -3  15  -3   34.60   17.80
   3 -15   3   70.59   22.60
   3 -15   3   46.00   17.70
   3 -15   3   43.80   17.10
   3 -15   3   32.40   22.00
  -4  15  -3  179.28   31.20
  -4  15  -3  149.09   23.80
   4 -15   3  130.29   29.20
   4 -15   3  242.08   32.30
   4 -15   3  277.97   41.90
   4 -15   3  163.58   30.00
  -5  15  -3   62.59   13.10
  -5  15  -3   51.09   19.10
   5 -15   3   92.49   20.30
   5 -15   3  136.99   33.00
   5 -15   3   85.29   22.20
   5 -15   3   52.99   24.30
  -6  15  -3   29.50   11.70
  -6  15  -3   33.10   18.50
   6 -15   3   37.20   19.20
   6  14  -3    4.00    5.70
   6  14  -3    5.40    8.10
   6  14  -3   26.90   10.20
  -6 -14   3   50.29   50.29
  -6 -14   3   10.70   26.40
  -6 -14   3    8.80   23.50
   5  14  -3    3.90    6.10
   5  14  -3    8.10   12.20
   5  14  -3   -0.60    9.10
   5  14  -3    9.10    7.80
  -5 -14   3   20.40   19.00
  -5 -14   3   -4.10   19.30
  -5 -14   3   92.69   48.70
   4  14  -3  194.88   25.40
   4  14  -3  208.58   28.40
   4  14  -3  245.38   23.90
  -4 -14   3  163.78   30.20
  -4 -14   3  206.58   35.10
   3  14  -3   20.60    7.60
   3  14  -3    8.90    7.40
   3  14  -3    5.80   12.50
   3  14  -3    1.20    9.00
  -3 -14   3  -13.10   17.20
  -3 -14   3   52.29   33.40
  -3 -14   3    7.60   13.40
   2  14  -3   -1.80   14.10
   2  14  -3    6.50    7.80
   2  14  -3   10.50    7.60
   2  14  -3    1.20    9.00
  -2 -14   3   -7.20   12.00
  -2 -14   3   26.80   22.70
  -2 -14   3   34.20   17.40
   1  14  -3   21.40   15.60
   1  14  -3   13.60    8.30
   1  14  -3   25.40    8.60
   1  14  -3    3.60    9.00
  -1 -14   3   -5.90   15.70
  -1 -14   3    8.30   11.70
   0  14  -3  112.69   16.10
   0  14  -3  113.89   21.20
   0  14  -3   89.69   13.00
   0  14  -3   77.09   14.60
   0 -14   3   55.39   14.00
   0 -14   3   43.10   18.70
  -1  14  -3   51.49   10.40
  -1  14  -3   40.50   13.20
  -1  14  -3   40.20   21.40
   1 -14   3    8.00   12.90
   1 -14   3   31.30   10.70
   1 -14   3   18.60   16.10
  -2  14  -3  579.54   51.29
  -2  14  -3  515.05   50.69
  -2  14  -3  432.66   53.29
   2 -14   3  457.95   54.99
   2 -14   3  454.15   52.09
   2 -14   3  561.24   55.39
   2 -14   3  392.56   52.59
  -3  14  -3   57.79   12.90
  -3  14  -3   82.89   33.50
  -3  14  -3   36.80   15.30
  -3  14  -3   20.90    9.60
   3 -14   3   27.30   12.90
   3 -14   3   47.50   14.50
   3 -14   3   27.90   16.70
   3 -14   3   26.00   21.60
  -4  14  -3  111.49   17.30
  -4  14  -3   66.69   19.60
   4 -14   3  182.48   30.60
   4 -14   3  130.29   19.80
   4 -14   3  134.59   22.90
   4 -14   3  108.09   20.50
  -5  14  -3   45.00   10.20
  -5  14  -3   85.09   20.40
  -5  14  -3   53.99   15.60
   5 -14   3   82.19   32.60
   5 -14   3   35.10   19.60
   5 -14   3   55.19   20.10
   5 -14   3   24.50   15.50
  -6  14  -3  203.88   25.00
   6 -14   3  217.18   40.70
   6 -14   3  194.08   31.80
   6 -14   3  182.68   32.30
   6 -14   3  308.37   45.50
  -7  14  -3    1.10   16.00
  -7  14  -3    6.90   30.90
  -7  14  -3   10.80   10.40
  -7  14  -3  -41.50   70.79
   7 -14   3    2.80   26.60
   7 -14   3    6.80   40.40
   7 -14   3   -9.70   18.30
   7  13  -3   62.89   11.30
   7  13  -3   43.90   15.90
   7  13  -3   57.79   10.00
  -7 -13   3   24.00   24.80
  -7 -13   3  185.38   47.70
   6  13  -3   49.60   11.00
   6  13  -3   52.19    9.80
   6  13  -3   43.50    7.20
   6  13  -3   62.79   12.70
  -6 -13   3   47.20   24.20
  -6 -13   3   63.59   23.00
   5  13  -3   -2.00    7.40
   5  13  -3    2.10    4.90
   5  13  -3    7.90    8.20
   5  13  -3   11.90   10.80
  -5 -13   3   52.69   43.80
  -5 -13   3  -16.90   17.30
  -5 -13   3   -5.30   15.50
   4  13  -3   58.29   10.40
   4  13  -3   52.09   12.40
   4  13  -3   81.99   11.80
   4  13  -3   67.29   10.80
  -4 -13   3   31.80   16.40
  -4 -13   3   53.39   15.10
  -4 -13   3  104.89   41.00
   3  13  -3  106.19   15.30
   3  13  -3  137.49   18.70
   3  13  -3  106.79   13.30
   3  13  -3  101.39   13.90
  -3 -13   3   61.69   15.80
  -3 -13   3   91.99   18.20
   2  13  -3  499.55   49.40
   2  13  -3  481.85   50.79
  -2 -13   3  501.15   50.59
  -2 -13   3  430.96   53.09
   1  13  -3   20.70    9.10
   1  13  -3    6.40   13.10
   1  13  -3   10.40    7.50
   1  13  -3   17.10    6.80
  -1 -13   3   -3.20   12.20
  -1 -13   3   14.40    9.90
   0  13  -3  473.05   47.30
   0  13  -3  478.55   46.10
   0  13  -3  617.94   96.29
   0  13  -3  460.45   49.99
   0 -13   3  404.76   45.50
   0 -13   3  379.06   49.30
   0 -13   3  480.85   47.00
   0 -13   3  265.87   89.39
  -1  13  -3   34.50    9.00
  -1  13  -3   44.60   10.00
  -1  13  -3   -5.10   60.89
  -1  13  -3   30.00   18.00
  -1  13  -3   30.50    8.60
  -1  13  -3   38.00   12.10
   1 -13   3   23.90   11.10
   1 -13   3   29.30   15.20
   1 -13   3  -36.00   78.89
   1 -13   3   20.50    9.10
   1 -13   3   28.80   14.30
  -2  13  -3   32.60   22.70
  -2  13  -3   11.00    9.10
  -2  13  -3   -0.40   12.40
  -2  13  -3   47.90   58.29
   2 -13   3    4.70    9.80
   2 -13   3   13.40   13.80
   2 -13   3   31.00   17.00
   2 -13   3  107.19   83.09
   2 -13   3    4.80    9.30
  -3  13  -3   33.90   11.70
  -3  13  -3   69.79   30.40
  -3  13  -3   20.40   11.90
   3 -13   3   22.70   12.70
   3 -13   3   16.50   14.00
   3 -13   3   17.40   20.10
   3 -13   3   24.60   10.60
  -4  13  -3   30.90   13.30
  -4  13  -3   44.40    8.60
  -4  13  -3  137.09   40.80
   4 -13   3   43.10   15.20
   4 -13   3   34.40   14.90
   4 -13   3   20.90   12.90
   4 -13   3   62.39   26.70
  -5  13  -3   95.69   14.20
  -5  13  -3   94.29   16.80
   5 -13   3   90.29   20.50
   5 -13   3   84.99   19.30
   5 -13   3  175.98   34.90
   5 -13   3   77.89   17.10
  -6  13  -3   18.90   24.60
  -6  13  -3   12.60    8.00
  -6  13  -3    5.50   57.39
   6 -13   3   -8.30   33.80
   6 -13   3    4.30   17.20
  -7  13  -3  175.08   71.39
  -7  13  -3   22.80   13.20
  -7  13  -3   43.40   10.30
   7 -13   3   48.30   22.30
   7 -13   3   82.69   37.10
   7 -13   3   55.79   17.00
  -8  13  -3   30.30   76.39
  -8  13  -3   14.30   14.00
  -8  13  -3   -6.80   14.70
  -8  13  -3    3.60   39.90
   8 -13   3    7.40   19.70
   8 -13   3  -39.00   35.80
   8 -13   3    6.50   28.20
   8  12  -3   92.59   13.20
   8  12  -3  113.39   18.60
   8  12  -3   96.19   14.40
   8  12  -3  141.89   17.10
   7  12  -3  118.59   15.90
   7  12  -3   84.19   11.90
   7  12  -3  102.39   17.30
   7  12  -3  115.29   14.10
  -7 -12   3  169.28   44.70
  -7 -12   3  120.09   56.69
  -7 -12   3   53.69   27.00
   6  12  -3  126.49   14.60
   6  12  -3  148.49   18.00
   6  12  -3  141.59   18.70
  -6 -12   3  116.99   24.50
  -6 -12   3  113.29   24.30
   5  12  -3   31.50    7.30
   5  12  -3   14.80    7.80
   5  12  -3   14.80    4.80
  -5 -12   3   24.40   15.70
  -5 -12   3   -3.40   15.80
  -5 -12   3   67.39   38.10
   4  12  -3  257.47   27.30
   4  12  -3  262.67   25.80
   4  12  -3  230.08   26.10
   4  12  -3  247.98   24.90
  -4 -12   3  344.77   56.19
  -4 -12   3  189.48   29.10
  -4 -12   3  182.58   30.00
   3  12  -3   49.60   10.00
   3  12  -3   49.00    7.70
   3  12  -3   40.10    6.80
   3  12  -3   24.60    8.20
  -3 -12   3   49.70   29.80
  -3 -12   3   47.60   11.00
  -3 -12   3   10.90   13.00
   2  12  -3   89.19   12.80
   2  12  -3   86.99   11.10
   2  12  -3   67.99   12.40
   2  12  -3   71.59   11.60
  -2 -12   3   45.70   11.80
  -2 -12   3   58.69   22.80
   1  12  -3   47.70    9.70
   1  12  -3   79.59   13.30
   1  12  -3   52.09   41.80
   1  12  -3   82.49   10.80
  -1 -12   3   51.49   10.60
  -1 -12   3   49.10   12.70
  -1 -12   3   51.39   53.29
  -1 -12   3   72.09   15.00
   0  12  -3  284.07   56.69
   0  12  -3  198.08   20.30
   0  12  -3  184.18   21.00
   0  12  -3  186.78   20.30
   0  12  -3  151.98   22.00
   0 -12   3  181.58   19.90
   0 -12   3  132.89   24.00
   0 -12   3   84.59   63.49
  -1  12  -3  482.75   55.49
  -1  12  -3  526.35   50.59
  -1  12  -3  582.84   50.69
  -1  12  -3  425.16   51.39
   1 -12   3  449.66   50.59
  -2  12  -3  497.05   48.90
  -2  12  -3  481.25   47.50
  -2  12  -3  526.85   46.90
  -2  12  -3  524.15   55.49
   2 -12   3  431.76   48.00
   2 -12   3  407.66   48.40
   2 -12   3  386.56   50.29
  -3  12  -3   64.89   10.00
  -3  12  -3   41.50   62.79
  -3  12  -3  130.99   28.20
  -3  12  -3   95.29   14.30
   3 -12   3   65.79   12.00
   3 -12   3   50.99   15.30
   3 -12   3   38.40   54.39
  -4  12  -3   76.09   14.60
  -4  12  -3   63.39   10.60
   4 -12   3  107.99   16.50
   4 -12   3  110.69   16.60
  -5  12  -3  169.08   26.80
  -5  12  -3  243.58   23.80
   5 -12   3  251.67   31.40
   5 -12   3  179.78   27.90
   5 -12   3  227.98   26.10
  -6  12  -3   86.49   16.60
  -6  12  -3  265.47   58.49
   6 -12   3  162.88   36.50
   6 -12   3  124.19   23.40
   6 -12   3  123.49   18.00
   6 -12   3   90.29   18.90
  -7  12  -3    2.60    7.60
  -7  12  -3  -45.10   32.40
  -7  12  -3   12.70   71.29
  -7  12  -3  -15.60   11.50
   7 -12   3   -6.80   14.00
   7 -12   3   12.30   31.30
   7 -12   3  -26.40   23.90
   7 -12   3    9.70   17.30
  -8  12  -3   30.20   10.30
  -8  12  -3   29.40   69.59
  -8  12  -3   27.20   14.20
  -8  12  -3   86.79   45.10
   8 -12   3   25.60   30.70
   8 -12   3   70.39   18.90
   8 -12   3   33.00   22.40
   8  11  -3    4.00    5.80
   8  11  -3    0.50    7.70
   8  11  -3    5.10    4.80
   8  11  -3   -3.00    8.80
  -8 -11   3    3.30   23.70
  -8 -11   3   -0.90   39.40
   7  11  -3   16.90    7.90
   7  11  -3    4.40    8.60
   7  11  -3   14.60    5.20
  -7 -11   3   22.60   42.40
  -7 -11   3    7.60   19.30
  -7 -11   3   38.10   31.20
   6  11  -3   55.69    8.40
   6  11  -3   84.09   10.90
   6  11  -3   66.59    9.30
  -6 -11   3   37.50   17.80
  -6 -11   3   45.50   32.10
  -6 -11   3   60.39   18.90
   5  11  -3  365.56   35.90
   5  11  -3  356.16   35.20
   5  11  -3  366.26   35.60
  -5 -11   3  332.47   55.29
  -5 -11   3  278.87   38.30
  -5 -11   3  301.57   40.60
   4  11  -3   11.80    6.00
   4  11  -3   12.10    5.80
   4  11  -3    9.20    4.10
   4  11  -3    5.50    7.10
  -4 -11   3   19.70    9.30
  -4 -11   3    1.00   12.50
  -4 -11   3    5.80   29.40
   3  11  -3  253.07   26.80
   3  11  -3  261.57   27.50
   3  11  -3  268.87   28.40
  -3 -11   3  259.97   29.20
  -3 -11   3  265.77   30.60
  -3 -11   3  273.27   47.20
   2  11  -3    9.60    5.10
   2  11  -3    3.00   28.60
   2  11  -3   21.50    5.40
  -2 -11   3   -6.20   38.40
  -2 -11   3    8.00    9.60
  -2 -11   3   17.60   20.50
  -2 -11   3    6.30    7.10
   1  11  -3   97.49   14.50
   1  11  -3  129.49   13.00
   1  11  -3  155.58   40.30
   1  11  -3   87.89   16.00
   1  11  -3  128.19   13.80
  -1 -11   3   45.00   44.10
  -1 -11   3   85.79   17.30
  -1 -11   3   91.39   14.40
  -1 -11   3   94.99   16.10
   0  11  -3   37.90   12.40
   0  11  -3   70.59    9.30
   0  11  -3  125.89   47.30
   0  11  -3   85.29   10.50
   0  11  -3   67.29   10.10
   0  11  -3   40.70    9.40
   0 -11   3   59.29   10.70
   0 -11   3   45.50    9.90
   0 -11   3   23.70   49.70
   0 -11   3   52.69    9.60
   0 -11   3   54.39    9.30
  -1  11  -3  156.28   47.70
  -1  11  -3  102.29   16.20
  -1  11  -3  104.69   13.50
  -1  11  -3   65.29   17.60
  -1  11  -3  118.49   14.40
  -1  11  -3  126.49   14.60
   1 -11   3   90.29   14.90
   1 -11   3   93.19   53.59
   1 -11   3   83.69   14.90
   1 -11   3  110.19   14.60
  -2  11  -3  337.07   38.50
  -2  11  -3  335.67   37.20
  -2  11  -3  408.56   37.00
  -2  11  -3  452.65   45.30
   2 -11   3  380.86   38.70
   2 -11   3  334.37   38.00
   2 -11   3  337.27   38.50
  -3  11  -3  702.03   74.99
  -3  11  -3  697.63   73.59
   3 -11   3  659.83   74.79
   3 -11   3  829.52   75.19
   3 -11   3  804.42   74.79
  -4  11  -3  237.68   43.00
  -4  11  -3  133.19   15.90
  -4  11  -3  107.39   19.20
   4 -11   3  126.39   18.60
   4 -11   3  146.99   20.30
   4 -11   3  168.58   21.40
   4 -11   3  157.78   39.10
  -5  11  -3   65.59   10.30
  -5  11  -3   59.19   41.80
  -5  11  -3   62.19   12.20
   5 -11   3   81.39   12.90
   5 -11   3   74.79   16.50
   5 -11   3   67.79   13.00
  -6  11  -3   53.99   11.60
  -6  11  -3   61.29   43.90
  -6  11  -3   43.50    8.20
   6 -11   3   56.49   12.60
   6 -11   3   80.59   29.00
   6 -11   3   59.19   12.90
   6 -11   3   64.29   19.40
  -7  11  -3   78.09   10.30
  -7  11  -3    5.00   54.79
  -7  11  -3  154.28   37.30
  -7  11  -3   39.00   12.80
   7 -11   3  105.19   24.20
   7 -11   3   31.80   24.70
   7 -11   3   75.99   30.10
   7 -11   3   63.59   15.30
  -8  11  -3  -15.50   17.70
  -8  11  -3   17.10    8.50
  -8  11  -3   -1.10   59.19
   8 -11   3  -15.40   22.50
   8 -11   3   13.10   28.30
   8 -11   3    7.30   17.00
  -9  11  -3   10.00   71.99
  -9  11  -3  -34.90   55.79
  -9  11  -3    9.60   14.90
  -9  11  -3   15.60   11.10
   9 -11   3    8.00   20.10
   9 -11   3   13.00   25.50
   9  10  -3   31.30    9.90
   9  10  -3   23.70    6.90
   9  10  -3   29.20    8.50
   9  10  -3   34.20    6.80
  -9 -10   3   63.99   40.40
  -9 -10   3   77.99   32.00
   8  10  -3   26.40    6.00
   8  10  -3   26.40    8.80
  -8 -10   3   -1.80   32.40
  -8 -10   3   27.30   22.70
   7  10  -3  165.68   20.10
   7  10  -3  167.88   18.40
   7  10  -3  195.68   20.00
  -7 -10   3  115.19   25.50
  -7 -10   3  181.08   35.20
   6  10  -3  177.28   20.20
   6  10  -3  174.48   19.40
   6  10  -3  194.78   19.90
  -6 -10   3  152.08   24.70
  -6 -10   3  148.29   25.00
   5  10  -3    2.40    6.10
   5  10  -3   -5.80    5.40
   5  10  -3    6.60    5.00
  -5 -10   3   -1.90    9.90
  -5 -10   3   -8.90   24.30
  -5 -10   3   10.50   12.40
   4  10  -3   -2.60    5.30
   4  10  -3    7.30    5.30
  -4 -10   3    1.70    8.10
  -4 -10   3   -3.00   10.50
  -4 -10   3  -13.00   23.10
   3  10  -3  335.97   30.90
   3  10  -3  266.67   31.00
   3  10  -3  322.07   30.50
   3  10  -3  260.67   42.20
  -3 -10   3  274.27   32.60
  -3 -10   3  291.07   31.70
   2  10  -3  103.59   14.00
   2  10  -3   69.49   28.30
   2  10  -3  119.49   12.60
   2  10  -3  126.79   12.90
   2  10  -3  104.69   12.50
  -2 -10   3   32.80   32.50
  -2 -10   3  112.39   16.60
  -2 -10   3   63.19   23.30
  -2 -10   3  105.29   14.10
   1  10  -3  161.18   16.30
   1  10  -3  126.39   18.10
   1  10  -3  136.19   16.30
   1  10  -3  166.78   16.10
   1  10  -3  145.79   17.30
   1  10  -3  172.38   39.00
  -1 -10   3  139.29   15.50
  -1 -10   3  218.48   37.80
  -1 -10   3   69.59   38.60
  -1 -10   3  141.89   17.00
   0  10  -3  447.16   44.00
   0  10  -3  390.16   44.90
   0  10  -3  479.95   43.30
   0  10  -3  471.55   43.50
   0 -10   3  371.56   43.40
   0 -10   3  387.86   43.90
   0 -10   3  433.16   43.00
  -1  10  -3    1.90    5.10
  -1  10  -3    2.10   11.50
  -1  10  -3    8.40    4.80
  -1  10  -3   -0.40    6.90
  -1  10  -3  -29.70   38.50
  -1  10  -3    6.00    6.90
   1 -10   3    4.80    5.20
   1 -10   3   13.60    5.70
   1 -10   3   30.40   42.40
   1 -10   3   -2.70    7.20
  -2  10  -3   54.29   10.50
  -2  10  -3   65.99    9.00
  -2  10  -3   56.19   17.70
  -2  10  -3  115.19   37.70
   2 -10   3   58.19   10.00
   2 -10   3   76.09   12.30
   2 -10   3   62.49   10.20
   2 -10   3   20.90   37.80
  -3  10  -3  589.74   58.19
  -3  10  -3  423.96   50.39
  -3  10  -3  518.95   49.50
   3 -10   3  484.55   51.09
   3 -10   3  498.25   50.49
   3 -10   3  495.35   50.59
  -4  10  -3  194.18   38.10
  -4  10  -3  183.08   19.30
  -4  10  -3  132.19   21.40
  -4  10  -3  272.37   39.20
   4 -10   3  178.58   21.30
   4 -10   3  216.68   21.60
   4 -10   3  185.48   24.70
   4 -10   3  148.89   38.10
  -5  10  -3   31.80   19.70
  -5  10  -3    4.10   29.40
  -5  10  -3    5.60   37.00
  -5  10  -3    5.40    4.40
  -5  10  -3    3.30    7.80
   5 -10   3   13.10   21.80
   5 -10   3   -1.20    8.20
   5 -10   3  -12.40   18.80
   5 -10   3   12.60    8.20
  -6  10  -3   31.70   10.00
  -6  10  -3   21.70   43.10
  -6  10  -3   34.30    6.50
   6 -10   3   49.60   10.10
   6 -10   3   47.10   17.40
   6 -10   3   33.50   10.30
  -7  10  -3   -2.90    8.10
  -7  10  -3    6.10    5.90
  -7  10  -3  -41.00   49.20
  -7  10  -3  -24.00   33.30
   7 -10   3   -7.40   19.00
   7 -10   3    9.60   10.70
   7 -10   3   -2.30   11.00
   7 -10   3    2.50   22.50
  -8  10  -3   79.59   15.50
  -8  10  -3  170.98   60.19
   8 -10   3   86.29   16.90
   8 -10   3   92.29   17.60
   8 -10   3  122.99   26.90
   8 -10   3   91.99   29.20
  -9  10  -3  -13.90   60.29
  -9  10  -3   58.69   12.00
  -9  10  -3   48.50   15.30
   9 -10   3   34.00   19.10
   9 -10   3   58.99   19.90
   9 -10   3   98.19   23.60
 -10  10  -3  133.99   23.80
 -10  10  -3  194.58   69.39
  10 -10   3  151.28   26.80
  10 -10   3   75.79   26.20
   9   9  -3  247.48   26.10
   9   9  -3  227.98   27.10
   9   9  -3  285.07   28.10
  -9  -9   3  215.18   38.50
   8   9  -3   13.30    7.80
   8   9  -3   20.00    4.90
   8   9  -3   26.70    7.20
  -8  -9   3  -21.40   26.90
  -8  -9   3   33.40   26.20
  -8  -9   3   -6.20   20.10
   7   9  -3   25.20    6.30
   7   9  -3   22.70    8.00
   7   9  -3   21.60    5.50
  -7  -9   3   -1.80   22.90
  -7  -9   3   15.30   15.70
  -7  -9   3   43.20   27.30
   6   9  -3   86.99   12.70
   6   9  -3   96.89   11.90
   6   9  -3  108.89   12.80
  -6  -9   3   53.49   23.60
  -6  -9   3  107.39   18.20
  -6  -9   3  101.29   19.20
   5   9  -3  367.56   41.60
   5   9  -3  477.05   41.80
   5   9  -3  415.56   43.30
  -5  -9   3  423.66   43.50
  -5  -9   3  365.56   44.10
   4   9  -3   54.49    8.10
   4   9  -3   41.80    6.80
   4   9  -3   53.09    8.30
   4   9  -3   31.10   14.90
  -4  -9   3   83.59   12.60
  -4  -9   3   13.50   24.00
  -4  -9   3   42.10    9.00
  -4  -9   3    8.80   20.00
   3   9  -3    7.40    4.70
   3   9  -3    8.70    4.00
   3   9  -3    0.00    3.90
  -3  -9   3   -1.50   23.40
  -3  -9   3    2.80    7.40
  -3  -9   3   -3.70   17.20
   2   9  -3   11.70    4.20
   2   9  -3   10.60    4.00
   2   9  -3   15.90    4.70
   2   9  -3  -19.80   21.60
   2   9  -3    6.80    5.70
  -2  -9   3   10.60   25.10
  -2  -9   3   13.00    6.40
  -2  -9   3    4.60    7.20
  -2  -9   3   -9.70   16.20
   1   9  -3   82.99   11.20
   1   9  -3  105.19   32.00
   1   9  -3   72.29   12.00
   1   9  -3   74.29   10.10
   1   9  -3   84.49   10.20
   1   9  -3   79.79   14.30
  -1  -9   3   63.39   20.50
  -1  -9   3   92.49   10.90
  -1  -9   3   54.09   29.70
  -1  -9   3   88.49    9.50
  -1  -9   3   83.19   12.50
   0   9  -3 1296.47  134.59
   0   9  -3 1271.57  134.89
   0   9  -3 1545.35  135.09
   0   9  -3 1490.85  134.49
   0  -9   3 1314.97  134.79
   0  -9   3 1300.47  135.09
   0  -9   3 1305.17  134.49
  -1   9  -3   40.10   32.40
  -1   9  -3  -10.00   10.40
  -1   9  -3    4.50    5.20
  -1   9  -3    9.80    7.10
  -1   9  -3    9.00    4.30
  -1   9  -3    6.90    4.50
   1  -9   3   12.80    4.90
   1  -9   3    3.40    5.00
   1  -9   3   15.80   33.30
   1  -9   3    8.70    5.90
  -2   9  -3   65.49   10.50
  -2   9  -3   49.20   15.80
  -2   9  -3   68.79    8.50
  -2   9  -3   65.59    9.10
  -2   9  -3   78.99   32.50
   2  -9   3   81.99    9.50
   2  -9   3   58.89   10.70
   2  -9   3   51.09    9.40
   2  -9   3   57.89   33.00
  -3   9  -3  220.88   43.40
  -3   9  -3  141.39   27.10
  -3   9  -3  178.38   18.30
  -3   9  -3  142.19   20.00
   3  -9   3  182.98   21.10
   3  -9   3  170.48   19.70
   3  -9   3  198.98   19.70
  -4   9  -3  271.27   48.60
  -4   9  -3  344.77   36.70
  -4   9  -3  379.26   35.40
   4  -9   3  288.77   36.20
   4  -9   3  349.67   36.60
   4  -9   3  409.16   38.70
   4  -9   3  407.56   47.40
  -5   9  -3  291.87   34.90
  -5   9  -3  359.16   34.00
  -5   9  -3  267.27   50.99
   5  -9   3  332.17   35.10
   5  -9   3  338.47   35.60
   5  -9   3  394.86   39.30
  -6   9  -3  -30.00   26.30
  -6   9  -3   -3.50    4.40
  -6   9  -3   -6.40    7.10
  -6   9  -3   -3.20   25.30
  -6   9  -3  -15.20   35.60
   6  -9   3  -10.10   24.90
   6  -9   3   22.50   17.20
   6  -9   3    7.20    8.70
   6  -9   3   -6.60    7.40
  -7   9  -3  188.68   25.00
  -7   9  -3  230.78   27.20
  -7   9  -3  232.58   53.39
   7  -9   3  265.77   27.70
   7  -9   3  256.47   38.30
   7  -9   3  300.47   28.80
  -8   9  -3    1.70   10.60
  -8   9  -3   18.50   44.50
  -8   9  -3    2.10    6.80
  -8   9  -3    8.10   49.00
   8  -9   3   16.70   13.10
   8  -9   3   27.40   19.20
   8  -9   3   -5.80   24.00
   8  -9   3   16.20   11.80
  -9   9  -3  -53.79   58.09
  -9   9  -3   17.50   13.60
  -9   9  -3   10.20    9.50
  -9   9  -3   44.00   69.79
   9  -9   3  -45.20   25.90
   9  -9   3   -6.80   32.10
   9  -9   3   12.90   15.20
   9  -9   3  -10.80   15.30
 -10   9  -3   65.49   64.59
 -10   9  -3    5.60   17.70
 -10   9  -3   41.50   14.90
 -10   9  -3  149.09   60.69
  10  -9   3   36.80   17.20
  10  -9   3  -15.70   20.00
  10   8  -3   12.50    6.30
  10   8  -3   28.80    9.00
  10   8  -3   24.60    7.50
 -10  -8   3   24.80   32.00
 -10  -8   3  -23.10   31.40
 -10  -8   3   55.89   34.90
   9   8  -3   94.09   13.70
   9   8  -3   90.89   14.50
   9   8  -3   99.09   13.40
  -9  -8   3  148.69   33.40
  -9  -8   3  106.49   46.60
  -9  -8   3  107.49   28.70
   8   8  -3   31.30    7.60
   8   8  -3   22.60    5.50
   8   8  -3   25.50    6.80
  -8  -8   3   14.10   18.80
  -8  -8   3   18.90   24.70
  -8  -8   3   13.30   22.90
   7   8  -3  107.09   13.70
   7   8  -3  116.49   14.20
   7   8  -3  115.89   12.80
  -7  -8   3  120.29   24.90
  -7  -8   3   84.89   27.50
  -7  -8   3   86.19   19.10
   6   8  -3   26.40    6.50
   6   8  -3   42.30    6.20
   6   8  -3   42.20    6.80
   6   8  -3   45.20    7.70
  -6  -8   3   -6.90   17.60
  -6  -8   3   64.39   16.10
  -6  -8   3   46.80   13.20
  -6  -8   3    8.10   16.10
   5   8  -3   84.29    9.30
   5   8  -3   65.09    9.30
   5   8  -3   71.99    8.40
   5   8  -3   82.69    9.50
  -5  -8   3   28.10   17.70
  -5  -8   3   37.60   12.60
  -5  -8   3   47.40   17.40
   4   8  -3  589.44   58.89
   4   8  -3  606.24   58.99
   4   8  -3  631.04   58.89
   4   8  -3  609.94   62.19
  -4  -8   3  506.75   60.39
   3   8  -3   18.20    4.00
   3   8  -3   28.60   15.20
   3   8  -3   24.00    4.70
   3   8  -3   17.70    4.50
  -3  -8   3   -1.60   14.10
  -3  -8   3   19.20    5.60
  -3  -8   3   13.70   18.90
  -3  -8   3   31.70    8.50
   2   8  -3  725.43   67.39
   2   8  -3  624.84   67.89
   2   8  -3  734.93   67.59
   2   8  -3  676.23   67.59
  -2  -8   3  635.74   67.59
  -2  -8   3  670.33   68.09
   1   8  -3   60.29    8.00
   1   8  -3   45.90    6.90
   1   8  -3   41.10    7.50
   1   8  -3   59.79   10.50
   1   8  -3   27.60   26.80
  -1  -8   3   17.20   14.80
  -1  -8   3   51.89    9.00
  -1  -8   3   52.69    6.00
  -1  -8   3   45.90   24.50
   0   8  -3  149.59   17.90
   0   8  -3  175.18   18.80
   0   8  -3  221.68   39.40
   0   8  -3  154.08   16.30
   0   8  -3  133.79   18.20
   0   8  -3  155.98   16.70
   0  -8   3  168.88   17.50
   0  -8   3  144.09   16.70
   0  -8   3  162.58   16.50
   0  -8   3  111.09   31.90
  -1   8  -3    5.80    8.90
  -1   8  -3   12.70   30.20
  -1   8  -3    9.20    3.90
  -1   8  -3   10.40    8.50
  -1   8  -3   10.80    3.50
  -1   8  -3    7.50    5.40
   1  -8   3   -1.00    3.90
   1  -8   3    5.10    3.60
   1  -8   3   12.30    4.60
   1  -8   3    7.50   26.50
  -2   8  -3  486.65   50.59
  -2   8  -3  529.85   49.80
  -2   8  -3  497.45   49.99
   2  -8   3  464.05   50.99
   2  -8   3  531.75   50.59
  -3   8  -3  -18.10   15.10
  -3   8  -3    5.20    4.80
  -3   8  -3  -15.90   21.90
  -3   8  -3   12.50   13.00
  -3   8  -3    0.80    2.80
   3  -8   3    2.50    6.80
   3  -8   3    6.50    4.60
   3  -8   3   12.30   19.20
   3  -8   3    5.20    4.80
  -4   8  -3   97.09   10.90
  -4   8  -3  138.79   24.20
  -4   8  -3  115.49   25.20
  -4   8  -3   37.80   22.80
  -4   8  -3   74.39   12.30
   4  -8   3  117.69   12.60
   4  -8   3  104.99   12.70
   4  -8   3   87.59   19.80
   4  -8   3  110.69   17.10
  -5   8  -3  422.36   47.00
  -5   8  -3  437.26   47.70
   5  -8   3  532.45   47.90
   5  -8   3  474.15   48.20
   5  -8   3  512.15   52.09
  -6   8  -3   27.80    5.20
  -6   8  -3   34.50    7.70
  -6   8  -3   65.49   28.00
  -6   8  -3   24.80   21.80
   6  -8   3   31.90    7.70
   6  -8   3   11.70   16.40
   6  -8   3   34.20   13.80
   6  -8   3   25.50    8.60
  -7   8  -3  269.27   26.60
  -7   8  -3  305.97   46.70
  -7   8  -3  209.98   41.30
  -7   8  -3  235.28   24.40
   7  -8   3  244.58   31.10
   7  -8   3  195.18   33.10
   7  -8   3  217.98   27.10
   7  -8   3  212.58   26.30
  -8   8  -3   61.69   44.30
  -8   8  -3   26.60   11.00
  -8   8  -3   30.40    7.80
  -8   8  -3   96.79   45.50
   8  -8   3   13.20   22.50
   8  -8   3   36.70   10.80
   8  -8   3   38.90   12.80
  -9   8  -3  -32.90   54.89
  -9   8  -3    7.50   11.60
  -9   8  -3    0.80   47.60
  -9   8  -3    2.10   13.30
   9  -8   3   33.50   17.00
   9  -8   3   11.60   13.20
   9  -8   3  -10.10   15.00
 -10   8  -3  -13.80   16.80
 -10   8  -3   13.00   14.20
 -10   8  -3  -67.99   48.20
 -10   8  -3  -59.49   70.99
  10  -8   3  -13.70   19.40
  10  -8   3    6.80   16.40
  10   7  -3    8.70    8.20
  10   7  -3   15.90    5.90
  10   7  -3   17.60    7.10
 -10  -7   3   15.40   28.60
 -10  -7   3   18.60   28.00
 -10  -7   3    4.30   32.20
   9   7  -3   11.60    6.40
   9   7  -3    3.10    4.90
   9   7  -3   13.70    7.80
  -9  -7   3   25.80   24.30
  -9  -7   3   21.90   22.70
  -9  -7   3   49.99   23.80
   8   7  -3   22.20    7.50
   8   7  -3    7.70    6.60
   8   7  -3   15.60    6.40
   8   7  -3   14.30    4.10
  -8  -7   3    6.20   19.30
  -8  -7   3   32.60   20.20
  -8  -7   3   11.60   21.10
   7   7  -3  592.24   55.79
   7   7  -3  568.84   55.79
   7   7  -3  516.85   55.99
   7   7  -3  586.64   55.49
  -7  -7   3  501.35   61.99
  -7  -7   3  568.94   59.79
  -7  -7   3  506.75   63.89
   6   7  -3   17.60    4.90
   6   7  -3   26.90    5.30
   6   7  -3   20.00    4.70
   6   7  -3   11.40    4.20
  -6  -7   3   -4.20   14.90
  -6  -7   3   12.60   11.50
  -6  -7   3    7.40   15.20
  -6  -7   3   20.40   14.70
   5   7  -3  162.18   17.90
   5   7  -3  182.58   22.30
   5   7  -3  163.38   17.90
   5   7  -3  163.48   17.70
  -5  -7   3  172.28   21.90
  -5  -7   3  179.08   21.00
   4   7  -3   44.20   11.90
   4   7  -3   47.80    6.70
   4   7  -3   56.29    6.90
   4   7  -3   36.70    6.40
   4   7  -3   45.80    6.10
  -4  -7   3   32.80   16.00
  -4  -7   3   53.39    9.80
  -4  -7   3   31.50   13.60
  -4  -7   3   48.30    7.70
   3   7  -3    9.90    3.50
   3   7  -3    8.00    3.20
   3   7  -3    6.70    3.10
   3   7  -3   13.20    3.60
   3   7  -3    9.30   12.00
  -3  -7   3   15.90    7.00
  -3  -7   3    3.80   11.30
  -3  -7   3    9.80    6.90
  -3  -7   3   13.20    4.30
  -3  -7   3   -9.10   14.80
   2   7  -3    1.00   16.20
   2   7  -3   38.00    5.60
   2   7  -3   23.40    4.20
  -2  -7   3   28.50   17.00
  -2  -7   3   19.00    4.70
  -2  -7   3   27.00    5.90
  -2  -7   3   34.00   12.70
   1   7  -3   37.30    6.10
   1   7  -3   37.50    5.60
   1   7  -3   44.30    7.60
   1   7  -3   -1.00   26.70
  -1  -7   3   39.50    6.50
  -1  -7   3   25.30   18.80
  -1  -7   3   31.30    5.70
  -1  -7   3   23.80   11.00
  -1  -7   3   38.50    4.80
   0   7  -3   82.09   10.60
   0   7  -3   75.29   13.50
   0   7  -3   77.69   11.80
   0   7  -3   94.49    9.80
   0   7  -3   79.29   28.90
   0  -7   3   88.29   24.10
   0  -7   3   83.79   10.20
   0  -7   3   81.69    9.70
   0  -7   3  102.99   10.70
  -1   7  -3  346.77   34.20
  -1   7  -3  299.57   36.80
  -1   7  -3  352.66   34.70
  -1   7  -3  428.06   51.89
  -1   7  -3  342.07   36.40
  -1   7  -3  382.66   34.30
   1  -7   3  356.16   34.60
   1  -7   3  296.97   34.30
   1  -7   3  246.18   46.10
   1  -7   3  357.56   34.80
  -2   7  -3 2483.15  222.28
  -2   7  -3 2205.98  217.88
  -2   7  -3 2024.50  215.98
  -2   7  -3 2221.58  216.48
  -2   7  -3 2187.98  215.78
   2  -7   3 2034.50  216.28
   2  -7   3 2239.18  216.28
   2  -7   3 2177.98  216.68
  -3   7  -3   31.00   19.30
  -3   7  -3    9.40    4.50
  -3   7  -3   13.50   11.20
  -3   7  -3   17.00    3.20
   3  -7   3   15.00    4.70
   3  -7   3   21.70   15.00
   3  -7   3   20.40    7.30
   3  -7   3   13.60    4.30
  -4   7  -3  839.92   89.39
  -4   7  -3  811.82   95.09
  -4   7  -3  856.81   89.99
   4  -7   3  879.61   89.89
   4  -7   3 1025.70   91.89
   4  -7   3  902.71   89.99
   4  -7   3 1022.40   92.79
  -5   7  -3   21.00    3.90
  -5   7  -3   27.80    6.10
  -5   7  -3   22.40   20.00
  -5   7  -3  -13.10   21.40
  -5   7  -3   -5.40   16.60
   5  -7   3   20.00   11.60
   5  -7   3   19.50    6.30
   5  -7   3   36.20   10.60
  -6   7  -3  288.17   40.40
  -6   7  -3  289.77   30.50
  -6   7  -3  307.97   47.00
  -6   7  -3  298.37   31.50
   6  -7   3  303.57   38.30
   6  -7   3  338.47   34.30
   6  -7   3  293.67   31.70
  -7   7  -3   89.79   12.60
  -7   7  -3   78.69   35.50
  -7   7  -3   64.69   20.40
  -7   7  -3   59.29   10.90
   7  -7   3  106.69   16.10
   7  -7   3  106.09   13.60
   7  -7   3  107.59   21.40
   7  -7   3   61.09   20.00
  -8   7  -3    7.50   10.50
  -8   7  -3    2.80   19.70
  -8   7  -3   40.10   34.50
  -8   7  -3   25.30    7.40
  -8   7  -3   59.39   45.20
   8  -7   3   36.20   14.30
   8  -7   3   54.59   14.10
   8  -7   3    7.60   11.30
   8  -7   3    2.20   19.60
   8  -7   3    8.80    9.30
  -9   7  -3  309.37   50.59
  -9   7  -3  216.18   28.40
  -9   7  -3  207.28   24.50
   9  -7   3  159.18   26.10
   9  -7   3  185.28   27.90
 -10   7  -3  104.39   17.40
 -10   7  -3   52.79   18.90
 -10   7  -3  128.69   44.90
  10  -7   3   30.80   22.70
  10  -7   3   86.49   17.30
  10  -7   3   47.20   17.50
 -11   7  -3    9.70   94.29
 -11   7  -3    1.50   20.60
 -11   7  -3  -20.70   46.80
 -11   7  -3   32.60   22.10
  11  -7   3   -8.50   18.30
  11  -7   3   -0.60   14.90
  11   6  -3    6.30    9.10
  11   6  -3    5.70    7.00
  11   6  -3    4.90    7.50
 -11  -6   3   -0.70   30.50
 -11  -6   3   -1.80   32.00
 -11  -6   3   31.90   38.70
  10   6  -3  111.79   16.30
  10   6  -3  113.19   13.90
 -10  -6   3  142.09   34.60
 -10  -6   3  136.29   29.50
 -10  -6   3   66.59   29.80
   9   6  -3   53.09    9.90
   9   6  -3   32.00    5.80
   9   6  -3   35.10    8.70
   9   6  -3   22.60    6.80
  -9  -6   3    3.90   22.40
  -9  -6   3   -1.60   20.10
  -9  -6   3   43.80   24.50
   8   6  -3  286.67   29.60
   8   6  -3  289.47   28.80
  -8  -6   3  247.78   38.40
  -8  -6   3  325.37   38.90
  -8  -6   3  230.18   44.00
   7   6  -3  318.47   31.00
   7   6  -3  316.27   31.70
   7   6  -3  326.27   31.90
  -7  -6   3  257.37   40.30
  -7  -6   3  249.97   38.20
  -7  -6   3  296.57   37.00
   6   6  -3   41.90    7.40
   6   6  -3   41.90    7.50
   6   6  -3   56.79    7.50
   6   6  -3   43.70    6.30
   6   6  -3   29.70   10.50
  -6  -6   3   21.50   14.00
  -6  -6   3   43.70   13.60
  -6  -6   3   30.00   12.70
  -6  -6   3   19.40   14.50
  -6  -6   3   33.70   11.50
   5   6  -3   10.70    3.40
   5   6  -3    7.00    3.90
   5   6  -3    2.60   12.80
   5   6  -3    8.50    3.50
  -5  -6   3    6.40   10.50
  -5  -6   3    1.20   12.90
  -5  -6   3   18.20   10.30
  -5  -6   3    2.70    8.00
  -5  -6   3   -4.50   10.70
   4   6  -3    5.00    8.30
   4   6  -3   11.00    3.10
   4   6  -3   14.10    3.50
   4   6  -3    8.90    3.20
  -4  -6   3   -0.90    9.20
  -4  -6   3   15.20    5.00
  -4  -6   3   10.90    6.90
  -4  -6   3  -13.10    9.20
  -4  -6   3    6.40   12.20
   3   6  -3    1.60    2.60
   3   6  -3    6.80    5.20
   3   6  -3    1.40    9.90
   3   6  -3    0.60    2.70
   3   6  -3    5.70    2.40
  -3  -6   3   -3.30    8.70
  -3  -6   3    2.80    5.10
  -3  -6   3    2.90    3.70
  -3  -6   3    9.80   12.10
   2   6  -3    2.20    2.70
   2   6  -3    5.60    2.50
   2   6  -3  -11.00   13.00
   2   6  -3    4.30    2.70
  -2  -6   3    0.90    3.00
  -2  -6   3    4.90    4.50
  -2  -6   3    5.00   12.90
  -2  -6   3   -7.50    8.50
  -2  -6   3    1.20    4.60
   1   6  -3   11.20    5.00
   1   6  -3   -5.10   17.90
   1   6  -3   12.70    2.80
   1   6  -3   12.90    3.60
   1   6  -3    8.10    3.00
  -1  -6   3    8.80   14.20
  -1  -6   3    5.90    7.50
  -1  -6   3   12.20    2.20
  -1  -6   3   10.50    4.00
  -1  -6   3    5.60    8.50
   0   6  -3 1479.45  135.19
   0   6  -3 1239.08  135.59
   0   6  -3 1454.95  135.39
   0  -6   3 1496.85  135.29
   0  -6   3 1347.37  135.19
   0  -6   3 1254.47  139.39
   0  -6   3 1298.47  135.09
  -1   6  -3 1164.68  129.59
  -1   6  -3 1315.87  128.89
  -1   6  -3 1329.07  128.59
  -1   6  -3 1419.16  128.59
   1  -6   3 1270.47  128.99
   1  -6   3 1216.18  128.79
   1  -6   3 1404.16  128.79
  -2   6  -3    7.80   10.20
  -2   6  -3   15.10    4.00
  -2   6  -3   19.10   11.20
  -2   6  -3   21.80    3.50
  -2   6  -3   28.50    5.70
  -2   6  -3   22.60   17.80
   2  -6   3    8.20   14.60
   2  -6   3   17.80    4.00
   2  -6   3   20.80    4.00
   2  -6   3   23.60    5.90
  -3   6  -3   12.60    6.70
  -3   6  -3    6.60    4.10
  -3   6  -3   13.90   13.40
  -3   6  -3    4.40   17.70
   3  -6   3   19.20    4.30
   3  -6   3    8.20    6.10
   3  -6   3    3.80    3.80
   3  -6   3    5.30   11.40
  -4   6  -3  379.46   39.60
  -4   6  -3  389.36   39.00
  -4   6  -3  372.06   46.10
   4  -6   3  382.36   39.70
   4  -6   3  457.35   42.60
   4  -6   3  371.56   39.50
   4  -6   3  405.16   42.40
  -5   6  -3    3.30    2.90
  -5   6  -3    0.50   13.60
  -5   6  -3    5.10    4.70
  -5   6  -3   34.30   22.30
   5  -6   3    0.20    7.40
   5  -6   3    6.40    5.20
   5  -6   3    0.10   10.40
   5  -6   3    5.10    4.60
  -6   6  -3  400.46   45.60
  -6   6  -3  398.96   40.80
  -6   6  -3  410.36   56.29
   6  -6   3  413.86   41.80
   6  -6   3  371.06   44.70
   6  -6   3  393.16   40.70
  -7   6  -3   22.60   34.50
  -7   6  -3   39.70    8.70
  -7   6  -3   23.40    6.10
  -7   6  -3   37.50   15.80
   7  -6   3   26.90    9.00
   7  -6   3   23.80    4.40
   7  -6   3   40.00    7.50
   7  -6   3   23.10   16.40
  -8   6  -3  172.98   30.40
  -8   6  -3  179.08   22.40
  -8   6  -3  232.98   41.70
  -8   6  -3  183.48   25.00
   8  -6   3  240.88   27.40
   8  -6   3  194.88   22.80
   8  -6   3  180.98   24.50
  -9   6  -3  223.18   31.20
  -9   6  -3  260.77   28.40
  -9   6  -3  177.98   45.20
   9  -6   3  235.18   29.30
 -10   6  -3   37.20   18.30
 -10   6  -3   49.80   16.20
 -10   6  -3  126.69   47.00
  10  -6   3   48.90   20.40
  10  -6   3   24.80   15.10
  10  -6   3   34.30   13.50
  10  -6   3   -5.30   17.40
 -11   6  -3   12.60   20.90
 -11   6  -3    8.70   21.40
 -11   6  -3    3.30   39.70
 -11   6  -3  -50.39   92.99
  11  -6   3   14.80   14.30
  11   5  -3  111.09   14.20
  11   5  -3   81.09   22.20
  11   5  -3  114.89   17.60
 -11  -5   3  100.39   30.40
 -11  -5   3   32.60   29.50
  10   5  -3   83.39   15.70
  10   5  -3   79.89   12.80
  10   5  -3  101.59   12.90
  10   5  -3  114.99   12.60
 -10  -5   3   60.39   25.50
 -10  -5   3   38.30   26.60
 -10  -5   3  112.89   31.20
   9   5  -3   -2.50    5.50
   9   5  -3    0.80    4.40
   9   5  -3    6.10    8.80
   9   5  -3   -5.70    7.00
  -9  -5   3   -7.00   17.70
  -9  -5   3    3.80   19.70
  -9  -5   3   -5.70   22.70
   8   5  -3  288.47   29.20
   8   5  -3  261.67   28.00
   8   5  -3  311.07   29.90
   8   5  -3  315.37   29.10
   8   5  -3  263.27   28.70
  -8  -5   3  208.38   34.60
  -8  -5   3  277.17   37.80
  -8  -5   3  233.38   40.70
  -8  -5   3  224.68   35.80
   7   5  -3  123.09   13.00
   7   5  -3  114.39   12.50
   7   5  -3   96.99   11.10
  -7  -5   3   71.59   17.60
  -7  -5   3   90.89   19.30
  -7  -5   3   75.49   18.00
   6   5  -3    5.70    3.10
   6   5  -3    1.80    7.00
   6   5  -3   -0.60    4.00
   6   5  -3    5.80    4.30
   6   5  -3   10.80    3.10
   6   5  -3    1.60    4.20
   6   5  -3    2.30    3.00
  -6  -5   3   25.80   11.60
  -6  -5   3    8.80   10.10
  -6  -5   3   -1.10    9.50
  -6  -5   3   -4.60   10.60
  -6  -5   3    6.00    9.70
   5   5  -3  380.86   36.80
   5   5  -3  359.06   36.50
   5   5  -3  369.46   38.40
   5   5  -3  375.26   36.20
   5   5  -3  365.76   36.80
  -5  -5   3  405.26   38.70
  -5  -5   3  377.56   38.20
  -5  -5   3  305.87   40.20
  -5  -5   3  376.66   38.80
  -5  -5   3  322.27   39.10
   4   5  -3   89.79    9.80
   4   5  -3   91.59   10.10
   4   5  -3   99.99   14.30
   4   5  -3   92.19    9.90
   4   5  -3   89.09   10.00
  -4  -5   3   74.69   14.50
  -4  -5   3   57.09   12.90
  -4  -5   3  107.69   11.50
  -4  -5   3   83.89   12.80
  -4  -5   3  103.29   14.00
   3   5  -3  481.25   46.80
   3   5  -3  484.95   46.80
   3   5  -3  471.55   49.30
   3   5  -3  396.66   46.80
  -3  -5   3  433.76   50.39
  -3  -5   3  503.85   47.60
  -3  -5   3  474.95   48.20
  -3  -5   3  515.65   47.00
   2   5  -3 1576.14  162.58
   2   5  -3 1654.73  162.68
   2   5  -3 1514.25  162.58
   2   5  -3 1730.33  162.58
  -2  -5   3 1628.44  164.78
  -2  -5   3 1778.52  163.48
  -2  -5   3 1790.92  162.88
  -2  -5   3 1438.06  162.88
  -2  -5   3 1728.23  162.58
   1   5  -3  179.98   27.00
   1   5  -3  161.38   16.30
   1   5  -3  154.38   16.10
   1   5  -3  154.88   16.00
  -1  -5   3  169.88   18.50
  -1  -5   3  147.59   17.20
  -1  -5   3  157.38   22.90
  -1  -5   3  151.18   16.00
  -1  -5   3  160.08   16.40
   0   5  -3   59.19    7.60
   0   5  -3   66.39   10.50
[truncated: 1,679,201 more chars]
