# Supplementary material
Source: MDPI journal article supplement (https://www.mdpi.com/2073-4352/13/4/704)
Supplement: s1 [file s1 › 2.cif]

 
data_IlyasSakh5_0ma_a
 
_audit_creation_method            'SHELXL-2014/7'
_shelx_SHELXL_version_number      '2014/7'
_chemical_name_systematic         ?
_chemical_name_common             ?
_chemical_melting_point           ?
_chemical_formula_moiety          ?
_chemical_formula_sum
 'C12 H12 Br4 Co N4 O8' 
_chemical_formula_weight          718.83

loop_
 _atom_type_symbol
 _atom_type_description
 _atom_type_scat_dispersion_real
 _atom_type_scat_dispersion_imag
 _atom_type_scat_source
 'C'  'C'   0.0033   0.0016
 'International Tables Vol C Tables 4.2.6.8 and 6.1.1.4'
 'H'  'H'   0.0000   0.0000
 'International Tables Vol C Tables 4.2.6.8 and 6.1.1.4'
 'O'  'O'   0.0106   0.0060
 'International Tables Vol C Tables 4.2.6.8 and 6.1.1.4'
 'Br'  'Br'  -0.2901   2.4595
 'International Tables Vol C Tables 4.2.6.8 and 6.1.1.4'
 'Co'  'Co'   0.3494   0.9721
 'International Tables Vol C Tables 4.2.6.8 and 6.1.1.4'
 'N'  'N'   0.0061   0.0033
 'International Tables Vol C Tables 4.2.6.8 and 6.1.1.4'
 
_space_group_crystal_system       monoclinic
_space_group_IT_number            15
_space_group_name_H-M_alt         'C 2/c'
_space_group_name_Hall            '-C 2yc'
 
_shelx_space_group_comment
;
The symmetry employed for this shelxl refinement is uniquely defined
by the following loop, which should always be used as a source of
symmetry information in preference to the above space-group names.
They are only intended as comments.
;
 
loop_
 _space_group_symop_operation_xyz
 'x, y, z'
 '-x, y, -z+1/2'
 'x+1/2, y+1/2, z'
 '-x+1/2, y+1/2, -z+1/2'
 '-x, -y, -z'
 'x, -y, z-1/2'
 '-x+1/2, -y+1/2, -z'
 'x+1/2, -y+1/2, z-1/2'
 
_cell_length_a                    18.3716(10)
_cell_length_b                    11.4111(6)
_cell_length_c                    13.2287(12)
_cell_angle_alpha                 90
_cell_angle_beta                  132.282(2)
_cell_angle_gamma                 90
_cell_volume                      2051.8(2)
_cell_formula_units_Z             4
_cell_measurement_temperature    100(2)
_cell_measurement_reflns_used      9936
_cell_measurement_theta_min        2.33
_cell_measurement_theta_max       37.34
 
_exptl_crystal_description        prismatic
_exptl_crystal_colour             pink
_exptl_crystal_density_meas       ?
_exptl_crystal_density_method     ?
_exptl_crystal_density_diffrn     2.327          
_exptl_crystal_F_000              1372
_exptl_transmission_factor_min    ?
_exptl_transmission_factor_max    ?
_exptl_crystal_size_max           0.054
_exptl_crystal_size_mid           0.023
_exptl_crystal_size_min           0.018
_exptl_absorpt_coefficient_mu     8.674
_shelx_estimated_absorpt_T_min    0.652
_shelx_estimated_absorpt_T_max    0.859
_exptl_absorpt_correction_type    multi-scan
_exptl_absorpt_correction_T_min   0.3308  
_exptl_absorpt_correction_T_max   0.7474
_exptl_absorpt_process_details    SADABS
_exptl_absorpt_special_details    ?
_diffrn_ambient_temperature       100(2)
_diffrn_radiation_wavelength      0.71073
_diffrn_radiation_type            MoK\a
_diffrn_source                    ?
_diffrn_measurement_device_type  'Bruker APEX-II CCD'
_diffrn_measurement_method       '\f and \w scans'
_diffrn_detector_area_resol_mean  ?
_diffrn_reflns_number             23514
_diffrn_reflns_av_unetI/netI      0.0538
_diffrn_reflns_av_R_equivalents   0.0925
_diffrn_reflns_limit_h_min        -30
_diffrn_reflns_limit_h_max        25
_diffrn_reflns_limit_k_min        -17
_diffrn_reflns_limit_k_max        19
_diffrn_reflns_limit_l_min        -20
_diffrn_reflns_limit_l_max        22
_diffrn_reflns_theta_min          2.330
_diffrn_reflns_theta_max          37.384
_diffrn_reflns_theta_full         25.242
_diffrn_measured_fraction_theta_max   0.914
_diffrn_measured_fraction_theta_full  1.000
_diffrn_reflns_Laue_measured_fraction_max    0.914
_diffrn_reflns_Laue_measured_fraction_full   1.000
_diffrn_reflns_point_group_measured_fraction_max   0.914
_diffrn_reflns_point_group_measured_fraction_full  1.000
_reflns_number_total              4908
_reflns_number_gt                 4079
_reflns_threshold_expression      'I > 2\s(I)'
_reflns_Friedel_coverage          0.000
_reflns_Friedel_fraction_max      .
_reflns_Friedel_fraction_full     .
 
_reflns_special_details
;
 Reflections were merged by SHELXL according to the crystal
 class for the calculation of statistics and refinement.
 
 _reflns_Friedel_fraction is defined as the number of unique
 Friedel pairs measured divided by the number that would be
 possible theoretically, ignoring centric projections and
 systematic absences.
;
 
_computing_data_collection       'Bruker APEX2'
_computing_cell_refinement       'Bruker SAINT'
_computing_data_reduction        'Bruker SAINT'
_computing_structure_solution    'SHELXS-97 (Sheldrick 2008)'
_computing_structure_refinement 'SHELXL-2014/7 (Sheldrick, 2014)'
_computing_molecular_graphics    'Bruker SHELXTL'
_computing_publication_material  'Bruker SHELXTL'
_refine_special_details           ?
_refine_ls_structure_factor_coef  Fsqd
_refine_ls_matrix_type            full
_refine_ls_weighting_scheme       calc
_refine_ls_weighting_details
'w=1/[\s^2^(Fo^2^)+(0.0312P)^2^+0.3993P] where P=(Fo^2^+2Fc^2^)/3'
_atom_sites_solution_primary      ?
_atom_sites_solution_secondary    ?
_atom_sites_solution_hydrogens    mixed
_refine_ls_hydrogen_treatment     mixed
_refine_ls_extinction_method      none
_refine_ls_extinction_coef        .
_refine_ls_number_reflns          4908
_refine_ls_number_parameters      139
_refine_ls_number_restraints      0
_refine_ls_R_factor_all           0.0433
_refine_ls_R_factor_gt            0.0324
_refine_ls_wR_factor_ref          0.0790
_refine_ls_wR_factor_gt           0.0758
_refine_ls_goodness_of_fit_ref    1.019
_refine_ls_restrained_S_all       1.019
_refine_ls_shift/su_max           0.001
_refine_ls_shift/su_mean          0.000
 
loop_
 _atom_site_label
 _atom_site_type_symbol
 _atom_site_fract_x
 _atom_site_fract_y
 _atom_site_fract_z
 _atom_site_U_iso_or_equiv
 _atom_site_adp_type
 _atom_site_occupancy
 _atom_site_site_symmetry_order  
 _atom_site_calc_flag
 _atom_site_refinement_flags_posn
 _atom_site_refinement_flags_adp
 _atom_site_refinement_flags_occupancy
 _atom_site_disorder_assembly
 _atom_site_disorder_group
Br6 Br 0.39932(2) 0.40598(2) 0.34526(2) 0.01464(5) Uani 1 1 d . . . . .
Br3 Br 0.33314(2) 0.30002(2) -0.03682(2) 0.01821(5) Uani 1 1 d . . . . .
Co1 Co 0.5000 0.84933(3) 0.2500 0.00800(6) Uani 1 2 d S T P . .
O10 O 0.58112(11) 0.86057(12) 0.46036(14) 0.0135(2) Uani 1 1 d . . . . .
O8 O 0.37460(11) 0.85716(13) 0.22193(16) 0.0155(3) Uani 1 1 d . . . . .
N1 N 0.5000 0.04209(17) 0.2500 0.0100(3) Uani 1 2 d S T P . .
N3 N 0.66520(12) 0.81510(13) 0.54959(16) 0.0109(3) Uani 1 1 d . . . . .
N2 N 0.5000 0.66359(17) 0.2500 0.0090(3) Uani 1 2 d S T P . .
O11 O 0.68512(13) 0.71965(16) 0.5273(2) 0.0339(5) Uani 1 1 d . . . . .
C4 C 0.5000 0.28855(19) 0.2500 0.0091(4) Uani 1 2 d S T P . .
O12 O 0.72750(16) 0.8632(2) 0.6600(2) 0.0460(7) Uani 1 1 d . . . . .
C5 C 0.5000 0.41867(19) 0.2500 0.0092(4) Uani 1 2 d S T P . .
C7 C 0.45934(13) 0.60432(14) 0.28873(18) 0.0097(3) Uani 1 1 d . . . . .
H7 H 0.4308 0.6465 0.3166 0.012 Uiso 1 1 calc R U . . .
C2 C 0.43086(14) 0.10234(14) 0.13503(19) 0.0115(3) Uani 1 1 d . . . . .
H2 H 0.3811 0.0604 0.0534 0.014 Uiso 1 1 calc R U . . .
C6 C 0.45784(14) 0.48274(14) 0.28916(19) 0.0100(3) Uani 1 1 d . . . . .
C3 C 0.42965(14) 0.22406(15) 0.13157(18) 0.0114(3) Uani 1 1 d . . . . .
C9 C 0.35756(18) 0.94203(18) 0.2838(3) 0.0195(4) Uani 1 1 d . . . . .
H9A H 0.4203 0.9633 0.3740 0.029 Uiso 1 1 calc R U . . .
H9B H 0.3134 0.9088 0.2936 0.029 Uiso 1 1 calc R U . . .
H9C H 0.3273 1.0121 0.2260 0.029 Uiso 1 1 calc R U . . .
H8 H 0.327(3) 0.829(3) 0.166(3) 0.026(9) Uiso 1 1 d . . . . .
 
loop_
 _atom_site_aniso_label
 _atom_site_aniso_U_11
 _atom_site_aniso_U_22
 _atom_site_aniso_U_33
 _atom_site_aniso_U_23
 _atom_site_aniso_U_13
 _atom_site_aniso_U_12
Br6 0.01703(9) 0.01076(7) 0.02009(10) 0.00124(6) 0.01410(8) -0.00170(6)
Br3 0.01606(9) 0.01054(8) 0.00942(8) 0.00195(5) 0.00101(8) 0.00042(6)
Co1 0.00733(13) 0.00529(11) 0.00763(13) 0.000 0.00350(12) 0.000
O10 0.0109(6) 0.0135(5) 0.0093(5) 0.0024(4) 0.0040(5) 0.0048(5)
O8 0.0100(6) 0.0145(6) 0.0196(7) -0.0067(5) 0.0089(6) -0.0026(5)
N1 0.0099(9) 0.0073(7) 0.0093(8) 0.000 0.0050(8) 0.000
N3 0.0108(6) 0.0111(5) 0.0088(6) -0.0005(5) 0.0058(6) -0.0015(5)
N2 0.0082(8) 0.0073(7) 0.0079(8) 0.000 0.0039(7) 0.000
O11 0.0155(8) 0.0194(7) 0.0325(10) -0.0090(7) 0.0023(8) 0.0093(6)
C4 0.0098(10) 0.0051(7) 0.0088(9) 0.000 0.0048(9) 0.000
O12 0.0194(9) 0.0601(14) 0.0197(9) -0.0219(9) -0.0027(8) 0.0124(10)
C5 0.0094(9) 0.0052(7) 0.0085(9) 0.000 0.0043(8) 0.000
C7 0.0104(7) 0.0064(5) 0.0101(7) 0.0001(5) 0.0060(6) 0.0006(5)
C2 0.0109(7) 0.0078(6) 0.0088(7) -0.0007(5) 0.0038(6) -0.0014(5)
C6 0.0104(7) 0.0065(5) 0.0127(7) 0.0003(5) 0.0076(6) -0.0012(5)
C3 0.0112(7) 0.0076(6) 0.0080(7) 0.0009(5) 0.0035(6) 0.0001(5)
C9 0.0192(9) 0.0172(8) 0.0252(10) -0.0029(7) 0.0163(9) 0.0006(7)
 
_geom_special_details
;
 All esds (except the esd in the dihedral angle between two l.s. planes)
 are estimated using the full covariance matrix.  The cell esds are taken
 into account individually in the estimation of esds in distances, angles
 and torsion angles; correlations between esds in cell parameters are only
 used when they are defined by crystal symmetry.  An approximate (isotropic)
 treatment of cell esds is used for estimating esds involving l.s. planes.
;
 
loop_
 _geom_bond_atom_site_label_1
 _geom_bond_atom_site_label_2
 _geom_bond_distance
 _geom_bond_site_symmetry_2
 _geom_bond_publ_flag
Br6 C6 1.8834(18) . ?
Br3 C3 1.8822(18) . ?
Co1 O8 2.0741(15) 2_655 ?
Co1 O8 2.0742(15) . ?
Co1 O10 2.0978(14) . ?
Co1 O10 2.0979(14) 2_655 ?
Co1 N2 2.119(2) . ?
Co1 N1 2.200(2) 1_565 ?
O10 N3 1.263(2) . ?
O8 C9 1.432(3) . ?
O8 H8 0.74(3) . ?
N1 C2 1.342(2) 2_655 ?
N1 C2 1.342(2) . ?
N1 Co1 2.200(2) 1_545 ?
N3 O12 1.223(2) . ?
N3 O11 1.246(2) . ?
N2 C7 1.339(2) 2_655 ?
N2 C7 1.339(2) . ?
C4 C3 1.393(2) . ?
C4 C3 1.393(2) 2_655 ?
C4 C5 1.485(3) . ?
C5 C6 1.394(2) 2_655 ?
C5 C6 1.394(2) . ?
C7 C6 1.388(2) . ?
C7 H7 0.9500 . ?
C2 C3 1.389(2) . ?
C2 H2 0.9500 . ?
C9 H9A 0.9800 . ?
C9 H9B 0.9800 . ?
C9 H9C 0.9800 . ?
 
loop_
 _geom_angle_atom_site_label_1
 _geom_angle_atom_site_label_2
 _geom_angle_atom_site_label_3
 _geom_angle
 _geom_angle_site_symmetry_1
 _geom_angle_site_symmetry_3
 _geom_angle_publ_flag
O8 Co1 O8 175.07(8) 2_655 . ?
O8 Co1 O10 92.73(6) 2_655 . ?
O8 Co1 O10 86.97(6) . . ?
O8 Co1 O10 86.97(6) 2_655 2_655 ?
O8 Co1 O10 92.73(6) . 2_655 ?
O10 Co1 O10 172.99(8) . 2_655 ?
O8 Co1 N2 92.47(4) 2_655 . ?
O8 Co1 N2 92.47(4) . . ?
O10 Co1 N2 93.50(4) . . ?
O10 Co1 N2 93.51(4) 2_655 . ?
O8 Co1 N1 87.53(4) 2_655 1_565 ?
O8 Co1 N1 87.53(4) . 1_565 ?
O10 Co1 N1 86.50(4) . 1_565 ?
O10 Co1 N1 86.49(4) 2_655 1_565 ?
N2 Co1 N1 180.0 . 1_565 ?
N3 O10 Co1 123.05(12) . . ?
C9 O8 Co1 124.77(13) . . ?
C9 O8 H8 108(3) . . ?
Co1 O8 H8 125(3) . . ?
C2 N1 C2 118.3(2) 2_655 . ?
C2 N1 Co1 120.83(10) 2_655 1_545 ?
C2 N1 Co1 120.83(10) . 1_545 ?
O12 N3 O11 119.16(19) . . ?
O12 N3 O10 120.34(17) . . ?
O11 N3 O10 120.49(17) . . ?
C7 N2 C7 119.3(2) 2_655 . ?
C7 N2 Co1 120.34(10) 2_655 . ?
C7 N2 Co1 120.34(10) . . ?
C3 C4 C3 116.3(2) . 2_655 ?
C3 C4 C5 121.87(10) . . ?
C3 C4 C5 121.88(10) 2_655 . ?
C6 C5 C6 116.7(2) 2_655 . ?
C6 C5 C4 121.63(10) 2_655 . ?
C6 C5 C4 121.64(10) . . ?
N2 C7 C6 121.62(17) . . ?
N2 C7 H7 119.2 . . ?
C6 C7 H7 119.2 . . ?
N1 C2 C3 122.11(17) . . ?
N1 C2 H2 118.9 . . ?
C3 C2 H2 118.9 . . ?
C7 C6 C5 120.35(17) . . ?
C7 C6 Br6 118.99(14) . . ?
C5 C6 Br6 120.65(12) . . ?
C2 C3 C4 120.58(17) . . ?
C2 C3 Br3 118.74(14) . . ?
C4 C3 Br3 120.67(13) . . ?
O8 C9 H9A 109.5 . . ?
O8 C9 H9B 109.5 . . ?
H9A C9 H9B 109.5 . . ?
O8 C9 H9C 109.5 . . ?
H9A C9 H9C 109.5 . . ?
H9B C9 H9C 109.5 . . ?
 
_refine_diff_density_max    1.201
_refine_diff_density_min   -1.850
_refine_diff_density_rms    0.159

_shelx_res_file
;

    IlyasSakh5_0ma_a.res created by SHELXL-2014/7

TITL IlyasSakh5_0ma_a.res in C2/c
CELL  0.71073  18.3716  11.4111  13.2287   90.000  132.282   90.000
ZERR     4.00   0.0010   0.0006   0.0012    0.000    0.002    0.000
LATT 7
SYMM  - X,   Y, 1/2 - Z
SFAC C  H  O  Br Co N
UNIT 48  48  32  16  4  16
MERG 2
L.S. 10
ACTA
BOND   $H
FMAP 2
PLAN 20
SIZE 0.054 0.023 0.018
TEMP  -173.15
WGHT    0.031200    0.399323
FVAR       0.16733
BR6   4    0.399324    0.405979    0.345264    11.00000    0.01703    0.01076 =
         0.02009    0.00124    0.01410   -0.00170
BR3   4    0.333142    0.300015   -0.036823    11.00000    0.01606    0.01054 =
         0.00942    0.00195    0.00101    0.00042
CO1   5    0.500000    0.849334    0.250000    10.50000    0.00733    0.00529 =
         0.00763    0.00000    0.00350    0.00000
O10   3    0.581125    0.860572    0.460357    11.00000    0.01090    0.01350 =
         0.00928    0.00239    0.00400    0.00484
O8    3    0.374600    0.857156    0.221931    11.00000    0.01001    0.01446 =
         0.01964   -0.00667    0.00894   -0.00256
N1    6    0.500000    0.042091    0.250000    10.50000    0.00989    0.00732 =
         0.00928    0.00000    0.00501    0.00000
N3    6    0.665201    0.815098    0.549586    11.00000    0.01082    0.01111 =
         0.00879   -0.00052    0.00581   -0.00150
N2    6    0.500000    0.663595    0.250000    10.50000    0.00816    0.00735 =
         0.00788    0.00000    0.00393    0.00000
O11   3    0.685117    0.719648    0.527334    11.00000    0.01551    0.01943 =
         0.03253   -0.00898    0.00229    0.00931
C4    1    0.500000    0.288545    0.250000    10.50000    0.00982    0.00508 =
         0.00876    0.00000    0.00479    0.00000
O12   3    0.727499    0.863236    0.659954    11.00000    0.01939    0.06014 =
         0.01968   -0.02193   -0.00267    0.01242
C5    1    0.500000    0.418670    0.250000    10.50000    0.00941    0.00523 =
         0.00851    0.00000    0.00426    0.00000
C7    1    0.459341    0.604317    0.288730    11.00000    0.01043    0.00636 =
         0.01013    0.00009    0.00601    0.00062
AFIX  43
H7    2    0.430818    0.646532    0.316598    11.00000   -1.20000
AFIX   0
C2    1    0.430859    0.102340    0.135031    11.00000    0.01094    0.00779 =
         0.00880   -0.00067    0.00378   -0.00142
AFIX  43
H2    2    0.381129    0.060432    0.053359    11.00000   -1.20000
AFIX   0
C6    1    0.457843    0.482736    0.289164    11.00000    0.01037    0.00648 =
         0.01274    0.00028    0.00763   -0.00122
C3    1    0.429648    0.224062    0.131571    11.00000    0.01122    0.00759 =
         0.00801    0.00089    0.00351    0.00012
C9    1    0.357558    0.942031    0.283768    11.00000    0.01922    0.01721 =
         0.02521   -0.00289    0.01626    0.00059
AFIX 137
H9A   2    0.420270    0.963267    0.373995    11.00000   -1.50000
H9B   2    0.313426    0.908844    0.293646    11.00000   -1.50000
H9C   2    0.327312    1.012079    0.225990    11.00000   -1.50000
AFIX   0
H8    2    0.327258    0.828991    0.165630    11.00000    0.02601
HKLF    4

REM  IlyasSakh5_0ma_a.res in C2/c
REM R1 =  0.0324 for    4079 Fo > 4sig(Fo)  and  0.0433 for all    4908 data
REM    139 parameters refined using      0 restraints

END

WGHT      0.0310      0.0000

REM Highest difference peak  1.201,  deepest hole -1.850,  1-sigma level  0.159
Q1    1   0.3624  0.4496  0.3222  11.00000  0.05    1.20
Q2    1   0.3682  0.2576 -0.0082  11.00000  0.05    1.20
Q3    1   0.4404  0.3658  0.3787  11.00000  0.05    1.19
Q4    1   0.5411  0.8895  0.2899  11.00000  0.05    1.19
Q5    1   0.2925  0.2569 -0.0706  11.00000  0.05    1.17
Q6    1   0.4334  0.4437  0.3728  11.00000  0.05    1.16
Q7    1   0.2981  0.3464 -0.0686  11.00000  0.05    1.11
Q8    1   0.3676  0.3447 -0.0068  11.00000  0.05    1.07
Q9    1   0.3614  0.3608  0.3065  11.00000  0.05    1.02
Q10   1   0.5394  0.8056  0.2851  11.00000  0.05    0.98
Q11   1   0.3687  0.4057  0.2812  11.00000  0.05    0.88
Q12   1   0.4504  0.4024  0.4471  11.00000  0.05    0.85
Q13   1   0.7013  0.8185  0.6599  11.00000  0.05    0.73
Q14   1   0.4616  0.2544  0.1899  11.00000  0.05    0.73
Q15   1   0.7236  0.8869  0.6096  11.00000  0.05    0.70
Q16   1   0.4815  0.4523  0.2800  11.00000  0.05    0.69
Q17   1   0.3791  0.2913  0.0613  11.00000  0.05    0.65
Q18   1   0.5000  0.3498  0.2500  10.50000  0.05    0.64
Q19   1   0.5203  0.0620  0.3013  11.00000  0.05    0.63
Q20   1   0.2482  0.9298  0.2316  11.00000  0.05    0.57
;
_shelx_res_checksum    3598

_shelx_hkl_file
;
  -2   0   2  229.78   22.10
  -2   0   2  286.27   20.20
  -2   0   2  259.17   20.20
   2   0  -2  249.97   20.20
  -2   0   2  236.78   20.30
   2   0  -2  281.07   20.20
   2   0  -2  234.08   20.30
   2   0  -2  272.87   22.40
  -4   0   4 1022.70   88.49
  -4   0   4 1203.78   84.99
  -4   0   4 1209.18   84.89
   4   0  -4 1086.79   84.89
  -4   0   4  987.90   85.29
   4   0  -4 1109.19   88.69
   4   0  -4  988.40   85.29
  -6   0   6  485.25   36.20
  -6   0   6  441.86   36.80
  -6   0   6  420.66   44.90
   6   0  -6  454.95   36.20
   6   0  -6  453.35   36.80
   6   0  -6  536.55   46.00
  -8   0   8  154.98   11.80
  -8   0   8  136.49   29.10
  -8   0   8  151.38   13.40
   8   0  -8  126.89   13.00
   8   0  -8  156.98   30.40
  -8   0   8  156.38   11.70
  10   0 -10 1948.31  163.58
 -10   0  10 2271.07  163.88
 -10   0  10 2001.00  162.68
 -10   0  10 2192.78  162.58
 -10   0  10 1843.92  175.78
  10   0 -10 2222.78  178.08
 -12   0  12  272.57   19.40
  12   0 -12  219.68   22.10
 -12   0  12  200.08   56.09
 -12   0  12  266.77   23.00
  12   0 -12  238.08   61.49
 -12   0  12  231.28   19.60
  14   0 -14    0.70   75.99
  14   0 -14    5.50    7.90
 -14   0  14   13.50   10.60
 -14   0  14  -53.59  116.89
 -16   0  16  650.13   51.19
 -18   0  18    6.60    3.20
 -20   0  20   64.29    7.90
 -22   0  22   27.80    6.40
  -1   1   1   28.60    2.70
  -1   1   1   33.90    2.50
   1   1  -1   32.30    4.40
   1   1  -1   32.80    2.50
  -1  -1   1   28.10    2.60
   1  -1  -1   30.40    2.70
  -1  -1   1   32.40    4.60
  -1  -1   1   31.60    2.50
  -1  -1   1   31.80    2.50
   1  -1  -1   29.60    2.50
  -3   1   3  646.34   50.59
   3   1  -3  691.23   53.49
   3   1  -3  689.13   50.69
   3   1  -3  681.73   50.59
   3   1  -3  575.04   50.89
  -3   1   3  647.24   53.69
  -3   1   3  663.33   50.69
  -3   1   3  620.14   50.89
  -3  -1   3  665.43   53.59
   3  -1  -3  627.64   50.89
  -3  -1   3  666.73   50.69
   3  -1  -3  664.03   50.59
   3  -1  -3  591.24   53.89
   5   1  -5    3.10    0.40
  -5   1   5    5.70    2.00
  -5   1   5    3.50    0.40
  -5   1   5    2.90   12.30
   5   1  -5    4.70   11.20
   5   1  -5    1.80    1.50
  -5  -1   5    0.90   12.00
  -5  -1   5    1.40    1.60
  -5  -1   5    2.60    0.60
  -5  -1   5    2.90    0.50
   5  -1  -5   19.30   13.00
   5  -1  -5    3.60    1.80
  -7   1   7   55.19   20.50
   7   1  -7   75.09    7.00
  -7   1   7   93.19    8.60
   7   1  -7  151.48   23.70
  -7   1   7   94.89    7.10
   7   1  -7   85.79    8.30
  -7   1   7   94.09    7.00
  -7  -1   7   98.89   22.50
   7  -1  -7   82.79   23.40
   7  -1  -7   84.69    8.50
  -7  -1   7   92.39    7.20
  -7  -1   7   89.59    7.00
   9   1  -9   30.20    5.60
   9   1  -9   24.30   29.30
  -9   1   9   31.80    2.50
  -9   1   9   20.70    5.20
  -9   1   9   -9.90   26.00
  -9   1   9   24.80    2.60
   9  -1  -9   20.10   30.90
  -9  -1   9   29.90    5.30
  -9  -1   9   21.90    2.70
  -9  -1   9  -23.20   48.80
   9  -1  -9   22.20    4.80
  -9  -1   9   33.90    2.50
  11   1 -11  103.19   12.70
 -11   1  11  137.59   10.10
 -11   1  11  204.28   48.20
 -11   1  11  118.69   10.20
  11   1 -11  138.69   46.30
 -11   1  11  138.99   14.10
 -11  -1  11  133.89   10.00
  11  -1 -11  107.29   13.00
 -11  -1  11  123.49   10.30
 -11  -1  11  146.09   13.70
 -11  -1  11   97.99   43.30
  11  -1 -11   96.59   49.00
 -13   1  13  812.02   65.29
  13   1 -13  755.62   66.99
 -13   1  13  808.22   68.19
 -13   1  13  731.13  108.49
 -13   1  13  893.21   65.19
  13  -1 -13  941.81  117.59
 -13  -1  13  893.91   67.59
 -13  -1  13  849.52   65.09
 -13  -1  13  804.32  110.19
 -13  -1  13  817.02   65.29
  13  -1 -13  842.12   67.39
  15   1 -15   10.90   11.30
 -15   1  15   27.00   13.90
 -15   1  15   25.00    3.90
 -15   1  15   27.60   89.39
 -15   1  15   26.50    3.00
 -15  -1  15   29.70   13.20
 -15  -1  15   23.50    3.70
 -15  -1  15   29.80    2.80
  15  -1 -15  -14.90   96.99
  15  -1 -15    6.60   10.20
 -17   1  17    0.20    2.60
 -17  -1  17    1.90    2.80
 -19   1  19    7.30    3.40
 -19  -1  19    2.80    3.40
 -21   1  21    7.10    6.80
 -21  -1  21    5.40    5.50
   0   2   0 1136.49   81.59
   0   2   0 1036.00   82.29
   0   2   0  949.40   81.59
   0  -2   0 1016.60   81.59
   0  -2   0 1077.59   82.29
  -2   2   2  615.14   51.29
   2   2  -2  652.13   49.00
  -2   2   2  628.64   49.00
   2   2  -2  637.14   49.20
   2   2  -2  660.43   50.79
  -2   2   2  593.54   49.20
  -2  -2   2  605.34   49.00
  -2  -2   2  587.04   50.89
   2  -2  -2  641.14   49.00
  -2  -2   2  650.73   49.20
  -4   2   4 1218.68   92.29
   4   2  -4 1265.77   92.29
  -4   2   4 1235.38   92.29
  -4   2   4 1167.28   92.69
  -4   2   4 1092.69   96.19
   4   2  -4 1118.89   92.59
   4   2  -4 1182.08   95.69
  -4  -2   4 1237.88   92.29
  -4  -2   4 1181.78   96.09
   4  -2  -4 1134.09   92.69
  -4  -2   4 1116.29   92.59
  -4  -2   4 1223.38   92.39
   6   2  -6   76.79    6.10
  -6   2   6   51.19   18.50
   6   2  -6   94.39   17.80
  -6   2   6   75.79    7.50
   6   2  -6   67.29    6.90
  -6   2   6   82.09    6.10
  -6   2   6   73.89    6.00
   6  -2  -6   78.19    7.40
  -6  -2   6   82.09    6.20
   6  -2  -6   58.49   19.70
  -6  -2   6   69.09   18.20
  -8   2   8 1477.05  112.09
  -8   2   8 1452.85  111.09
   8   2  -8 1284.97  110.99
   8   2  -8 1563.44  121.19
  -8   2   8 1417.96  121.59
  -8   2   8 1401.56  110.99
   8   2  -8 1216.98  111.69
  -8  -2   8 1502.75  111.89
   8  -2  -8 1680.73  124.09
  -8  -2   8 1580.24  125.49
   8  -2  -8 1339.07  111.89
  -8  -2   8 1327.67  110.99
  -8  -2   8 1425.36  111.19
  10   2 -10    2.90    3.80
  10   2 -10   36.20   34.50
 -10   2  10    5.20    1.30
 -10   2  10   25.30   33.50
 -10   2  10    7.10    1.00
 -10   2  10    6.00    5.20
 -10  -2  10    9.10   34.00
 -10  -2  10    9.30    1.10
 -10  -2  10    7.60    5.80
  10  -2 -10   23.20   39.80
  10  -2 -10    4.60    4.80
 -12   2  12  122.99    8.60
  12   2 -12  200.28   54.49
  12   2 -12   95.89   12.20
 -12   2  12  103.19   14.60
 -12   2  12  111.99   53.69
 -12   2  12  103.39    8.80
 -12  -2  12  100.09   50.69
 -12  -2  12   95.79    8.90
  12  -2 -12  125.29   59.49
  12  -2 -12   97.49   12.90
 -12  -2  12  112.09    8.50
 -14   2  14  -21.00   73.19
 -14   2  14    8.90    1.90
  14   2 -14    5.60    9.00
 -14   2  14    3.70    1.50
 -14   2  14    7.10   11.20
 -14  -2  14   17.20    9.40
 -14  -2  14    7.00    1.10
  14  -2 -14    6.70    8.80
  14  -2 -14   26.90   86.49
 -14  -2  14  -11.10   86.79
 -14  -2  14    5.30    2.10
 -16   2  16   49.20    4.30
 -16   2  16   36.80    4.90
 -16   2  16   52.69   18.30
 -16   2  16   34.90  110.19
 -16  -2  16   37.60    5.10
  16  -2 -16   20.00   12.60
  16  -2 -16   20.70  140.39
 -18   2  18   68.29    8.00
 -18  -2  18   62.39    7.20
 -20   2  20   13.50    4.20
 -20  -2  20   14.00    4.20
 -22   2  22    2.80    5.10
  -1   3   1  100.19    8.60
   1   3  -1  109.49   10.90
   1   3  -1  108.89   10.50
  -1   3   1   99.89   11.80
  -1   3   1  108.79    8.40
  -1   3   1  108.59    8.40
   1  -3  -1  124.89   12.70
   1  -3  -1  105.99    8.60
   1  -3  -1   96.99    8.40
  -1  -3   1  113.39    8.40
  -1  -3   1   91.49    8.50
  -1  -3   1  109.99    8.50
   3   3  -3   89.79    6.70
  -3   3   3   89.39    6.70
  -3   3   3  103.79   14.50
   3   3  -3   80.69    7.00
  -3   3   3   81.39    7.20
   3   3  -3   73.89   12.40
   3  -3  -3   87.19    7.20
  -3  -3   3   79.89    7.00
  -3  -3   3   71.99   12.20
  -3  -3   3   82.99    6.70
  -5   3   5 1704.93  142.49
   5   3  -5 1896.21  137.39
  -5   3   5 1703.23  137.39
  -5   3   5 1789.12  137.39
  -5   3   5 1742.93  137.99
   5   3  -5 1815.92  141.59
   5   3  -5 1557.34  137.69
  -5  -3   5 1777.92  137.49
  -5  -3   5 1640.34  137.79
   5  -3  -5 1702.63  137.89
  -5  -3   5 1981.20  137.39
  -5  -3   5 1816.72  142.49
  -7   3   7  882.11   79.19
   7   3  -7 1014.60   78.69
  -7   3   7  863.31   68.99
  -7   3   7  935.21   69.99
  -7   3   7  898.81   68.99
   7   3  -7  820.92   69.59
  -7  -3   7  897.31   68.99
  -7  -3   7  861.51   79.19
  -7  -3   7  863.01   69.09
  -7  -3   7  873.91   69.69
   7  -3  -7  848.42   69.89
   9   3  -9   53.69   28.50
   9   3  -9   63.19    8.20
  -9   3   9   86.89    6.40
  -9   3   9   57.69   32.20
  -9   3   9   86.39    6.30
  -9  -3   9   70.49    6.50
   9  -3  -9   93.19   35.80
  -9  -3   9   55.39   30.60
   9  -3  -9   77.69    9.30
  -9  -3   9   75.69    6.20
 -11   3  11  163.28   16.80
  11   3 -11  136.39   44.90
 -11   3  11  157.98   12.50
  11   3 -11  159.48   15.30
 -11   3  11  102.19   46.40
 -11  -3  11  158.68   12.30
 -11  -3  11  121.69   46.70
  11  -3 -11  154.08   15.50
 -11  -3  11  147.89   12.60
 -11  -3  11  165.38   15.70
  13   3 -13  173.18   64.79
 -13   3  13  166.88   67.29
 -13   3  13  102.39   16.90
  13   3 -13   96.89   14.40
 -13   3  13  106.59    8.60
 -13   3  13  107.29    8.80
  13  -3 -13  101.19   14.80
 -13  -3  13  108.09    8.40
  13  -3 -13  225.78   76.39
 -13  -3  13  103.79    8.90
 -13  -3  13   97.29   65.09
 -15   3  15  135.09    9.90
 -15   3  15  147.59   24.30
 -15   3  15   73.89   91.99
 -15   3  15  105.99   10.20
  15  -3 -15  215.08  116.29
  15  -3 -15  136.69   19.60
 -15  -3  15  113.39   10.30
 -17   3  17  150.68   11.40
 -17   3  17  119.19   11.70
 -17  -3  17  144.69   13.60
 -19   3  19    1.60    3.50
 -19  -3  19   -0.30    3.90
 -21  -3  21   56.09    8.60
   0   4   0 1704.93  131.99
   0  -4   0 1712.13  131.99
   0  -4   0 1745.03  131.89
   0  -4   0 1594.14  133.39
  -2   4   2  155.08   13.40
  -2   4   2  134.59   18.50
  -2   4   2  149.29   13.00
   2  -4  -2  202.58   20.20
   2  -4  -2  175.38   13.40
  -2  -4   2  169.18   13.20
  -2  -4   2  178.38   13.10
  -4   4   4  338.97   30.70
  -4   4   4  274.47   22.70
   4   4  -4  231.58   27.40
  -4   4   4  273.27   22.10
   4  -4  -4  290.07   22.70
  -4  -4   4  257.47   30.00
  -4  -4   4  274.47   22.10
  -4  -4   4  309.17   22.40
  -6   4   6  565.94   43.80
   6   4  -6  515.75   43.40
  -6   4   6  562.84   42.90
  -6   4   6  470.25   52.79
   6   4  -6  561.24   50.99
  -6   4   6  509.45   42.90
  -6  -4   6  477.55   52.99
  -6  -4   6  556.44   43.50
  -6  -4   6  617.84   42.90
  -6  -4   6  554.24   43.00
   6  -4  -6  648.24   57.39
   6  -4  -6  530.45   43.70
  -8   4   8  178.48   33.10
  -8   4   8  151.88   18.30
   8   4  -8  152.78   14.50
  -8   4   8  181.18   13.40
   8   4  -8  148.19   28.60
  -8   4   8  167.68   13.30
  -8  -4   8  178.78   32.80
   8  -4  -8  192.38   38.90
  -8  -4   8  175.18   13.50
  -8  -4   8  168.38   13.30
  -8  -4   8  177.08   14.70
   8  -4  -8  165.18   15.10
  10   4 -10  419.46   37.40
 -10   4  10  484.65   66.79
 -10   4  10  456.75   36.10
  10   4 -10  420.56   65.59
 -10   4  10  525.65   38.40
 -10   4  10  474.45   36.10
 -10  -4  10  496.45   37.70
 -10  -4  10  429.06   68.39
  10  -4 -10  443.16   37.80
  10  -4 -10  605.74   77.09
 -10  -4  10  453.25   36.30
 -10  -4  10  417.66   36.00
 -12   4  12  -33.60   53.39
  12   4 -12  -29.40   49.90
 -12   4  12    1.40    1.40
 -12   4  12   -1.40    8.20
  12   4 -12   -2.30    6.00
 -12   4  12    1.30    1.00
  12  -4 -12    7.50    7.00
 -12  -4  12   -1.50    1.60
  12  -4 -12   54.99   65.19
 -12  -4  12  -43.50   52.69
 -12  -4  12    0.90    0.80
 -14   4  14   15.70    2.50
 -14   4  14   13.20    2.40
 -14   4  14   24.40   12.40
 -14   4  14  -32.40   80.09
  14   4 -14   23.60    9.40
  14  -4 -14   67.19  101.69
  14  -4 -14    6.00    9.70
 -14  -4  14   18.20    2.60
 -14  -4  14   17.80   10.10
 -16   4  16   81.59    7.30
 -16   4  16  123.19   20.90
 -16   4  16   50.39  153.48
 -16   4  16   88.09    6.90
  16  -4 -16   75.39  149.29
  16  -4 -16   57.49   15.60
 -16  -4  16   62.79    7.70
 -18   4  18   30.10    4.30
 -18  -4  18   32.00    4.50
 -20   4  20   64.19    8.20
 -20  -4  20   73.19   11.50
  -1   5   1 1306.87  107.29
   1   5  -1 1451.35  109.29
   1   5  -1 1442.36  108.79
  -1   5   1 1301.47  109.59
   1   5  -1 1282.67  107.29
  -1   5   1 1394.16  107.49
  -1  -5   1 1348.67  107.39
   1  -5  -1 1259.77  107.49
  -1  -5   1 1403.56  107.29
   1  -5  -1 1580.34  110.39
  -1  -5   1 1366.76  107.39
   3   5  -3   44.70   10.00
  -3   5   3   50.59    4.40
  -3   5   3   44.10   13.40
  -3   5   3   58.79    5.40
  -3  -5   3   51.59   11.30
  -3  -5   3   54.19    4.50
  -3  -5   3   51.79    4.80
   3  -5  -3   72.49   15.90
   3  -5  -3   60.19    5.30
  -5   5   5  218.88   17.80
   5   5  -5  232.08   17.30
  -5   5   5  197.38   30.90
   5   5  -5  199.18   26.10
  -5   5   5  212.08   16.80
   5  -5  -5  195.78   17.70
  -5  -5   5  213.98   17.30
  -5  -5   5  181.38   34.10
  -5  -5   5  221.08   16.90
   7   5  -7  159.68   13.80
   7   5  -7  118.99   24.30
  -7   5   7  172.68   30.50
  -7   5   7  157.68   12.90
  -7   5   7  184.48   14.70
  -7   5   7  168.18   12.90
   7  -5  -7  170.08   35.50
   7  -5  -7  161.98   14.40
  -7  -5   7  157.28   13.00
  -7  -5   7  158.38   30.60
   9   5  -9  256.37   22.80
  -9   5   9  269.27   21.50
  -9   5   9  278.27   21.50
  -9   5   9  223.48   43.10
   9   5  -9  239.68   45.60
  -9   5   9  298.87   23.90
   9  -5  -9  283.87   23.60
  -9  -5   9  286.07   53.79
  -9  -5   9  257.17   21.70
  -9  -5   9  285.17   23.00
   9  -5  -9  316.17   51.99
  11   5 -11  130.39   44.40
 -11   5  11   73.89    6.20
 -11   5  11   72.39   46.30
  11   5 -11   72.99   10.20
 -11   5  11   92.69   13.40
 -11   5  11   72.89    6.30
  11  -5 -11   79.49   11.90
 -11  -5  11   51.09   48.60
  11  -5 -11  155.18   59.59
 -11  -5  11   79.29   10.80
 -11  -5  11   75.99    6.80
 -13   5  13   41.30   65.69
  13   5 -13   12.90    7.50
 -13   5  13   28.10   12.30
 -13   5  13   24.30    2.50
 -13  -5  13   20.70    3.00
  13  -5 -13   10.40    9.30
 -13  -5  13   10.50    8.00
 -15   5  15  170.08   33.10
 -15   5  15  145.19   12.50
 -15   5  15  172.18  100.99
 -15   5  15  154.98   12.30
  15  -5 -15  302.97  136.29
 -15  -5  15  147.09   12.80
  15  -5 -15  172.08   23.90
 -17   5  17    6.70    2.90
 -17   5  17   12.90    2.50
 -17  -5  17    7.60    3.30
 -19   5  19   21.90    4.20
 -19  -5  19   16.50    4.60
 -21   5  21   33.80    5.90
   0   6   0   44.00    8.90
   0   6   0   26.20    2.20
   0   6   0   22.50    3.20
   0  -6   0   47.40   11.50
   0  -6   0   27.00    2.30
  -2   6   2  866.51   66.59
   2   6  -2  704.73   61.79
  -2   6   2  774.22   61.79
   2   6  -2  852.11   64.09
  -2   6   2  775.22   62.19
  -2  -6   2  758.82   61.99
  -2  -6   2  791.22   61.89
  -2  -6   2  766.22   61.99
   2  -6  -2  856.21   62.29
  -4   6   4  187.28   15.00
   4   6  -4  219.88   23.00
   4   6  -4  175.98   15.40
  -4   6   4  194.98   16.00
  -4   6   4  174.08   27.20
   4  -6  -4  244.08   32.80
   4  -6  -4  181.28   15.80
  -4  -6   4  170.28   25.80
  -4  -6   4  204.88   15.40
   6   6  -6   17.30   16.30
  -6   6   6   11.30    1.30
  -6   6   6   14.90    4.00
  -6   6   6    9.90    1.40
  -6   6   6   -8.10   21.00
   6   6  -6   16.80    2.90
  -6  -6   6   21.40   22.30
  -6  -6   6   11.30    1.80
  -6  -6   6    9.50    2.60
   6  -6  -6   10.50    3.70
   8   6  -8 1547.25  120.49
  -8   6   8 1492.35  132.69
  -8   6   8 1485.85  119.79
  -8   6   8 1471.85  119.79
  -8   6   8 1739.53  121.09
  -8  -6   8 1657.93  120.49
  -8  -6   8 1366.16  134.09
   8  -6  -8 1443.36  120.79
  -8  -6   8 1540.25  119.89
 -10   6  10   36.30    3.50
 -10   6  10   40.10    3.70
  10   6 -10  -16.60   35.50
  10   6 -10   41.20    7.90
 -10   6  10   45.60    8.20
 -10   6  10   31.50   43.10
 -10  -6  10   51.19    8.20
  10  -6 -10   49.00    8.30
  10  -6 -10   76.39   55.39
 -10  -6  10   76.09   47.80
  12   6 -12  101.59   13.40
 -12   6  12  121.89   16.70
 -12   6  12   76.39   61.49
 -12   6  12   96.99    8.60
 -12   6  12  106.89    8.80
 -12  -6  12  113.69    9.10
  12  -6 -12  169.28   83.39
  12  -6 -12  115.49   15.40
 -14   6  14   11.80  141.59
  14  -6 -14  -81.09  113.19
 -16   6  16    0.20    2.10
 -16   6  16   -0.50    2.50
 -16  -6  16    5.60    3.00
 -18   6  18  109.99   10.10
 -18  -6  18  109.89   10.80
 -20   6  20   18.60    4.90
 -20  -6  20   20.80    5.40
  -1   7   1    3.00    1.70
   1   7  -1   15.60    8.30
  -1   7   1    1.20    0.80
   1   7  -1    1.20   10.50
  -1   7   1    1.40   10.60
   1   7  -1    3.70    0.60
  -1  -7   1    1.70    0.80
   1  -7  -1    3.50    1.70
   1  -7  -1   -1.00   12.80
  -3   7   3   33.40   16.00
  -3   7   3   65.79    6.00
   3   7  -3   59.19   11.90
   3   7  -3   74.99   11.90
   3   7  -3   50.19    4.70
  -3   7   3   58.99    4.70
   3  -7  -3   85.79   21.50
   3  -7  -3   52.09    5.90
  -3  -7   3   57.59    5.10
  -3  -7   3   56.99    5.10
  -3  -7   3   59.19    4.80
  -5   7   5 1551.54  128.19
  -5   7   5 1860.51  129.09
   5   7  -5 1700.73  132.29
  -5   7   5 1627.64  136.29
  -5  -7   5 1590.54  128.39
  -5  -7   5 1556.64  128.29
   5  -7  -5 1610.84  128.89
  -7   7   7   91.19   32.10
  -7   7   7  127.19   10.20
   7   7  -7  139.99   11.60
   7   7  -7  134.39   24.80
  -7   7   7  127.59   10.30
  -7  -7   7  120.59   10.50
   7  -7  -7  126.99   12.50
  -7  -7   7  102.09   33.30
  -7  -7   7  136.89   11.50
   9   7  -9   45.80    7.50
  -9   7   9   45.10    3.90
  -9   7   9   39.20    3.80
  -9   7   9   72.89   39.80
  -9   7   9   57.19   10.10
   9   7  -9   58.59   31.60
   9  -7  -9   80.79   51.49
  -9  -7   9    8.30   43.50
  -9  -7   9   50.99    7.50
  -9  -7   9   43.90    4.80
   9  -7  -9   45.20    9.40
 -11   7  11   73.89    6.40
 -11   7  11   61.19   56.19
 -11   7  11   71.69    6.20
 -11   7  11   86.49   14.90
  11   7 -11   77.29   10.80
 -11  -7  11   88.19   11.20
  11  -7 -11   64.49   13.00
  11  -7 -11   25.20   72.19
 -11  -7  11   77.19    6.80
 -13   7  13   77.59    6.30
 -13   7  13  100.59   81.09
  13   7 -13   52.49   10.60
 -13   7  13   77.99    6.50
 -13  -7  13   72.69    7.10
 -13  -7  13   86.19   14.80
  13  -7 -13  144.29  108.79
 -15   7  15  101.69    8.30
 -15   7  15   88.79    7.90
 -15  -7  15   85.79    8.70
 -17   7  17   25.00    3.40
 -19   7  19    8.10    4.00
 -19  -7  19   10.70    5.00
   0   8   0  176.68   14.80
   0   8   0  216.28   15.40
   0   8   0  206.28   23.00
   0  -8   0  170.08   15.20
   0  -8   0  175.48   28.40
  -2   8   2   11.30    2.70
   2   8  -2    8.10   11.00
   2   8  -2   22.70   14.60
   2   8  -2   12.80    1.50
  -2   8   2   14.40    1.50
  -2   8   2   16.20   15.10
  -2  -8   2   13.30    2.40
  -2  -8   2   11.10    1.80
   2  -8  -2   11.00    2.70
   2  -8  -2   10.30   18.40
  -2  -8   2   11.50    1.80
  -4   8   4  267.57   22.50
   4   8  -4  344.37   29.80
  -4   8   4  309.17   38.50
  -4   8   4  311.27   23.50
   4   8  -4  293.97   29.90
   4   8  -4  264.87   22.50
  -4  -8   4  284.37   22.70
  -4  -8   4  281.77   22.60
   4  -8  -4  257.67   23.30
  -4  -8   4  285.87   22.70
   4  -8  -4  407.36   47.50
  -6   8   6  -24.70   32.90
   6   8  -6   -2.50   17.10
  -6   8   6    3.60    1.00
  -6   8   6    0.20    4.20
  -6  -8   6    0.90    2.50
   6  -8  -6   13.50   37.10
   6  -8  -6    8.40    4.20
  -6  -8   6    3.60    1.40
  -8   8   8  300.67   48.30
  -8   8   8  288.57   21.80
  -8   8   8  279.07   21.80
   8   8  -8  311.27   47.00
   8  -8  -8  276.07   24.00
  -8  -8   8  267.57   22.80
  -8  -8   8  168.78   48.70
 -10   8  10   52.49   51.49
 -10   8  10    6.60    1.30
 -10   8  10    9.70    1.60
  10   8 -10    7.90    5.90
  10  -8 -10   27.70   69.69
  10  -8 -10    8.70    7.60
 -10  -8  10    8.70    5.10
 -12   8  12  131.49   10.20
  12   8 -12  129.69   16.00
 -12   8  12  180.88   76.59
 -12   8  12  108.89   10.00
 -12  -8  12  136.09   15.80
 -12  -8  12  125.49   10.70
  12  -8 -12  240.18  102.19
 -14   8  14    8.10    2.20
 -14   8  14    6.80    1.90
 -16   8  16   23.00    3.60
 -16   8  16   26.60    3.90
 -16  -8  16   25.70    4.40
 -18   8  18    6.10    3.80
 -18   8  18   11.90    3.40
 -18  -8  18   12.10    5.40
   1   9  -1 1045.30   85.99
   1   9  -1 1036.30   81.79
  -1   9   1 1050.09   81.79
  -1  -9   1  979.30   81.89
   1  -9  -1 1166.98   91.29
  -1  -9   1 1101.79   81.89
   1  -9  -1  986.50   82.09
   3   9  -3  528.55   44.60
   3   9  -3  558.14   43.80
  -3   9   3  532.65   53.49
  -3   9   3  542.25   41.30
   3   9  -3  476.45   41.20
  -3  -9   3  529.35   41.30
  -3  -9   3  547.15   41.40
  -3  -9   3  533.55   41.30
   3  -9  -3  501.95   41.90
  -5   9   5   91.19   29.30
  -5   9   5   78.99    6.90
   5   9  -5   82.49    6.90
   5   9  -5   95.09   17.90
   5   9  -5   75.49   16.40
  -5   9   5   93.09    9.50
  -5  -9   5   83.19    7.20
  -5  -9   5   87.89    7.60
  -5  -9   5   89.59    7.50
   5  -9  -5   68.69   36.30
  -7   9   7   22.30    6.60
   7   9  -7   16.70   28.30
   7   9  -7   50.69   23.60
  -7   9   7   28.30    2.60
  -7   9   7   14.50   35.70
   7  -9  -7   69.49   49.50
  -7  -9   7   19.50    5.00
   7  -9  -7   19.80    5.60
  -7  -9   7   27.40    5.20
  -7  -9   7   22.30    3.20
  -9   9   9  357.86   65.69
   9   9  -9  546.05   38.30
  -9   9   9  426.86   36.70
  -9   9   9  439.86   36.60
  -9  -9   9  457.35   36.90
  -9  -9   9  497.75   37.80
  11   9 -11   68.89   12.40
 -11   9  11   48.40    4.40
 -11   9  11   12.10   67.39
 -11   9  11   45.70    4.50
  11  -9 -11  125.49  133.59
 -11  -9  11   64.09   11.20
 -11  -9  11   41.10    5.40
 -13   9  13  293.17   22.50
 -13   9  13  283.47   22.70
 -13  -9  13  275.97   23.50
 -15   9  15  192.78   15.60
 -15   9  15  189.28   15.40
 -15  -9  15  187.58   16.20
 -17   9  17   30.80    4.50
 -17   9  17   38.20    5.00
 -17  -9  17   30.00    5.30
 -19   9  19   11.30    6.50
   0  10   0 1074.79   88.39
   0  10   0 1014.20   83.69
   0  10   0 1168.98   91.69
   0 -10   0 1056.69   84.09
  -2  10   2  352.46   29.00
  -2  10   2  422.26   29.90
   2  10  -2  370.46   31.90
   2  10  -2  366.56   30.90
   2  10  -2  356.26   29.00
  -2 -10   2  346.87   29.10
   2 -10  -2  392.16   51.99
  -4  10   4  543.45   42.60
  -4  10   4  506.15   61.79
   4  10  -4  512.45   42.50
  -4  10   4  603.64   43.70
  -4 -10   4  515.95   42.70
   4 -10  -4  615.14   69.39
   4 -10  -4  537.75   43.50
   6  10  -6   46.40   16.70
   6  10  -6   33.70    3.60
   6  10  -6   40.00   17.40
  -6  10   6   39.00    3.60
  -6  10   6   60.39   36.50
  -6  10   6   42.40    3.70
  -6 -10   6   43.30    4.20
  -6 -10   6   40.50    4.80
   6 -10  -6   96.09   50.59
  -6 -10   6   42.00    4.60
  -8  10   8   65.19    5.60
   8  10  -8   87.09   37.10
  -8  10   8   74.59    5.70
  -8  10   8   90.19   54.79
  -8 -10   8   66.99    7.90
   8 -10  -8   89.59   68.39
  -8 -10   8   54.99    6.20
 -10  10  10   71.59    6.60
 -10  10  10   84.59    6.80
 -10 -10  10   84.39    7.50
  10 -10 -10  -24.40  103.29
 -10 -10  10   78.89   10.90
 -12  10  12  480.35   37.20
 -12  10  12  475.35   37.10
 -12 -10  12  459.85   38.00
 -14  10  14   56.19    6.00
 -14 -10  14   60.89    7.30
 -16  10  16   46.20    6.30
 -16  10  16   54.79    5.60
 -16 -10  16   44.50    6.20
 -18  10  18  102.79    9.30
 -18  10  18   79.09   11.10
   1  11  -1  676.43   55.59
   1  11  -1  579.94   49.90
  -1  11   1  622.04   49.90
   1  11  -1  729.63   52.79
  -1  11   1  624.94   60.69
   1 -11  -1  612.34   50.19
   3  11  -3   58.59    5.40
  -3  11   3   66.99    5.50
  -3 -11   3   68.89    5.80
   3 -11  -3  121.89   39.00
  -5  11   5  -27.40   37.00
   5 -11  -5   18.40   45.90
  -7  11   7   82.19   50.19
  -7  11   7  130.59   10.60
  -7  11   7  132.39   10.70
   7  11  -7  137.39   10.70
   7 -11  -7  146.09   69.29
  -7 -11   7  124.29   11.00
   9  11  -9  251.87   44.30
  -9  11   9  235.58   17.60
  -9  11   9  219.68   17.50
  -9 -11   9  226.58   18.70
  -9 -11   9  196.38   18.00
 -11  11  11   11.30    2.00
 -11  11  11   15.30    2.30
 -11 -11  11    8.80    4.20
 -11 -11  11    9.80    7.90
 -13  11  13   44.90    4.70
 -13  11  13   50.09    5.40
 -13 -11  13   40.50    6.50
 -15  11  15   54.99    6.40
 -15  11  15   59.89    5.80
 -15 -11  15   45.70    7.60
 -17  11  17   79.49    8.30
 -17 -11  17   89.59   10.70
   0  12   0   10.50    1.50
   0 -12   0    7.60    2.70
  -2  12   2   71.59    5.90
   2  12  -2   66.79    5.80
  -2  12   2   44.00   29.80
   2 -12  -2  119.89   42.40
  -4  12   4  498.05   67.89
   4  12  -4  422.06   33.80
  -4  12   4  410.96   33.80
   4 -12  -4  552.94   82.19
  -4 -12   4  435.06   34.00
   6  12  -6   72.69    6.00
  -6  12   6   68.49    6.00
  -6  12   6   68.19    6.10
   6 -12  -6  154.18   68.69
  -6 -12   6   68.09    6.60
  -8  12   8  320.17   23.20
   8  12  -8  304.17   23.20
  -8  12   8  270.17   23.10
  -8 -12   8  272.47   23.60
 -10  12  10   76.19    6.60
  10  12 -10   72.69    6.60
 -10 -12  10   66.29    7.80
 -12  12  12    9.30    2.20
 -12  12  12    8.00    2.60
 -12 -12  12    4.60    3.90
 -14  12  14   22.50    4.00
 -14  12  14   33.00    4.30
 -14 -12  14   32.70    5.30
 -16  12  16   -2.10    3.60
 -16 -12  16    6.50    5.30
   1  13  -1    8.10    1.60
  -1  13   1   -7.20   25.00
  -1  13   1   10.20    1.70
   1 -13  -1   11.20    4.00
   3  13  -3   84.09    7.50
  -3  13   3   96.09    7.60
  -3  13   3   94.89   41.10
   3 -13  -3   94.09   56.59
  -5  13   5  396.26   30.10
  -5  13   5  383.26   30.00
  -5  13   5  303.97   64.19
   5  13  -5  389.76   30.10
   5 -13  -5  422.56   81.59
  -5 -13   5  362.36   30.30
   7  13  -7  213.48   16.90
  -7  13   7  220.68   16.90
  -7  13   7  216.38   17.00
  -7 -13   7  192.58   17.50
   9  13  -9   21.40    3.30
  -9  13   9   23.40    3.50
  -9  13   9   19.30    2.50
  -9 -13   9   13.50    3.80
 -11  13  11  135.89   11.60
  11  13 -11  144.59   11.50
 -11  13  11  134.69   11.40
 -11 -13  11  134.89   12.60
 -13  13  13   49.99    5.30
 -13  13  13   49.50    6.20
  13  13 -13   42.70    5.40
 -13 -13  13   41.60    6.20
  15  13 -15   17.30    3.70
 -15  13  15   16.80    3.60
 -15 -13  15   20.00    6.00
   0  14   0   33.50    3.70
  -2  14   2   65.19    6.30
   2  14  -2   77.49    6.20
  -4  14   4   41.30   54.79
  -4  14   4    6.20    1.90
   4  14  -4    7.40    1.80
  -4  14   4    7.30    2.80
   4 -14  -4  -27.00   76.29
  -6  14   6    3.00    1.70
   6  14  -6    0.20    2.40
  -6  14   6    0.30    2.00
  -6 -14   6    2.60    4.00
  -8  14   8  197.08   14.60
   8  14  -8  170.68   14.50
  -8  14   8  183.38   14.50
  -8 -14   8  159.88   15.40
 -10  14  10    9.20    2.30
 -10  14  10    6.50    2.90
  10  14 -10   11.80    2.60
 -10 -14  10   15.30    4.40
  12  14 -12    1.80    3.20
 -12  14  12    3.40    3.20
 -12  14  12    8.10    2.70
 -12 -14  12    0.60    5.50
 -14  14  14    7.80    3.20
   1  15  -1    1.40    1.80
  -1  15   1    4.20    1.90
  -3  15   3  112.89    9.20
  -3  15   3  101.89    9.10
   3  15  -3  110.79   10.10
  -5  15   5   11.60    2.50
  -5  15   5   11.30    2.10
   5  15  -5    8.30    2.20
   7  15  -7   84.59    7.40
  -7  15   7   86.79    7.50
  -7  15   7   70.39    7.30
  -7 -15   7   90.09    9.00
  -9  15   9   31.00    5.10
   9  15  -9   28.10    4.70
  -9  15   9   37.90    4.50
  -9 -15   9   44.30    5.90
 -11  15  11    7.30    4.60
  11  15 -11    8.00    3.00
 -11  15  11   11.70    3.40
 -11 -15  11    1.00    5.50
 -13  15  13   37.90    5.90
   0  16   0  228.18   18.30
   2  16  -2    2.50    2.20
  -2  16   2    2.90    2.30
  -2  16   2    2.80    2.00
  -4  16   4  151.08   12.70
   4  16  -4  156.68   12.80
  -4  16   4  157.38   12.90
  -6  16   6   65.69    6.30
   6  16  -6   60.99    6.10
  -6  16   6   53.59    5.90
   8  16  -8   79.69    7.40
  -8  16   8   78.49    7.60
  -8  16   8   64.09    8.70
  -8 -16   8   73.19    9.70
 -10  16  10  148.59   12.90
 -10  16  10  160.58   13.40
  10  16 -10  144.39   13.20
 -10 -16  10  173.28   15.50
  -1  17   1    9.40    2.60
   1  17  -1   13.80    2.80
  -1  17   1   18.60    2.90
   1  17  -1    8.90    2.60
  -3  17   3   12.30    2.60
  -3  17   3   15.00    3.00
   3  17  -3   13.80    2.90
   5  17  -5  116.89   10.50
  -5  17   5  114.29   10.80
  -5  17   5  143.89   12.00
  -7  17   7   24.40    3.30
   7  17  -7   18.70    3.40
  -7  17   7   14.20    3.90
   0  18   0  109.19    9.80
   2  18  -2    5.90    3.30
  -2  18   2   11.60    2.90
  -2  18   2   10.00    3.20
   2  18  -2    7.90    2.90
  -4  18   4   49.90    5.90
   4  18  -4   58.09    6.10
  -4  18   4   52.19    6.70
   4  18  -4   49.99    6.20
  -6  18   6    2.40    4.00
   6  18  -6    0.60    3.20
   6  18  -6    2.00    3.20
  -1  19   1   25.00    4.30
   1  19  -1   20.80    4.10
  -3  19   3  179.08   15.40
 -22   0  21    2.50    4.50
 -20   0  19    1.10    3.40
 -18   0  17    4.10    2.80
 -16   0  15    1.10    1.10
  16   0 -15   -1.40   10.00
 -16   0  15   14.40   12.40
 -16   0  15    1.00    2.10
 -14   0  13   -0.50    1.60
 -14   0  13    1.40    8.60
  14   0 -13   -4.30    7.00
 -14   0  13    1.00    1.00
  14   0 -13   39.00   64.49
 -14   0  13  -23.30   58.09
 -12   0  11    0.50    0.80
 -12   0  11   -0.10    1.20
 -12   0  11   10.00   37.20
  12   0 -11    1.10    5.40
  12   0 -11    5.30   40.50
 -12   0  11   -0.10    5.60
  10   0  -9   20.30   30.60
  10   0  -9   -3.40    3.50
 -10   0   9    1.20    0.60
 -10   0   9   -2.60    3.90
 -10   0   9   -4.70   27.20
 -10   0   9    2.60    1.00
   8   0  -7   -9.70   18.90
  -8   0   7    0.80    0.70
   8   0  -7   -0.10    2.50
  -8   0   7    9.00   18.80
  -8   0   7    0.50    2.60
  -6   0   5   -0.80    2.10
  -6   0   5   -1.40    0.30
   6   0  -5   -1.50    1.80
   6   0  -5  -16.80   11.30
  -6   0   5   -1.70   12.10
   4   0  -3   -0.80    1.00
   4   0  -3    2.60    7.70
   4   0  -3   -1.40    0.40
  -4   0   3    2.90    6.90
  -4   0   3   -0.60    0.30
  -4   0   3   -1.70    0.90
  -4   0   3   -1.10    0.10
   2   0  -1    2.30    3.00
  -2   0   1   -2.90    0.20
  -2   0   1   -3.80    0.50
   0   0   1   -0.40    0.20
   0   0   1    0.20    0.40
   0   0  -1    0.20    0.10
   0   0  -1    0.90    3.50
  -2   0   3  -10.90    1.00
  -2   0   3  -10.60    7.10
   2   0  -3   -9.50    1.00
  -2   0   3  -10.30    0.30
   2   0  -3   -9.60    0.30
   2   0  -3  -10.00    7.60
   2   0  -3  -10.60    0.30
  -2   0   3  -10.40    0.30
   4   0  -5   -0.70    0.40
  -4   0   5    0.20    0.40
   4   0  -5    0.30    1.60
  -4   0   5   -7.50   12.60
  -4   0   5    2.30    1.80
  -4   0   5    0.90    0.50
   4   0  -5   -1.10   12.80
   6   0  -7    3.20   20.10
  -6   0   7    0.80    0.70
  -6   0   7    1.60   19.30
  -6   0   7   -1.30    2.70
   6   0  -7    0.20    2.40
  -6   0   7    0.50    0.60
  -8   0   9  -31.80   26.40
  -8   0   9   -0.70    0.80
   8   0  -9   -4.20    3.20
  -8   0   9    0.80    3.90
 -10   0  11   -1.80    1.00
 -10   0  11   -0.60   40.30
  10   0 -11   -5.00   44.90
  10   0 -11    2.00    4.70
 -10   0  11   -0.90    6.20
 -10   0  11   -1.80    1.20
 -12   0  13   83.89   57.09
 -12   0  13   -0.60    1.60
  12   0 -13    3.80    6.80
 -12   0  13    6.90    8.50
  12   0 -13    3.40   63.09
  14   0 -15  -45.00   93.29
 -14   0  15   -0.20    2.00
 -14   0  15  -35.70   86.79
  14   0 -15    4.00   11.20
 -14   0  15    1.10   12.50
 -14   0  15   -1.30    1.80
 -16   0  17    1.10    2.70
 -18   0  19    3.90    3.40
 -20   0  21    1.20    4.20
 -21   1  20   21.40    4.50
 -21  -1  20   21.30    4.60
 -19   1  18   73.19    7.70
 -19  -1  18   82.29    7.90
 -17   1  16   17.00    2.80
 -17  -1  16   11.80    2.80
 -15   1  14   50.19   11.80
 -15   1  14   -8.30   72.29
 -15   1  14   51.89    4.00
  15   1 -14   29.10   75.39
 -15   1  14   43.50    4.50
 -15  -1  14   46.60   11.00
  15  -1 -14   24.30    9.90
 -15  -1  14   37.60    4.60
 -15  -1  14   -6.90   70.99
  13   1 -12  230.08   55.99
  13   1 -12  152.18   16.70
 -13   1  12  187.28   18.60
 -13   1  12  109.69   51.69
 -13   1  12  158.48   14.00
 -13   1  12  199.08   13.80
  13  -1 -12  180.38   17.70
 -13  -1  12  181.08   13.80
  13  -1 -12  208.88   62.19
 -13  -1  12  184.48   17.60
 -13  -1  12  150.98   54.99
 -13  -1  12  161.08   14.10
  11   1 -10  394.06   34.10
 -11   1  10  430.06   34.60
 -11   1  10  338.67   59.09
 -11   1  10  447.46   32.80
 -11   1  10  412.56   32.90
 -11  -1  10  446.36   32.70
 -11  -1  10  426.06   32.90
 -11  -1  10  362.26   58.89
  11  -1 -10  397.06   34.30
  -9   1   8  437.86   37.50
   9   1  -8  421.16   37.30
   9   1  -8  570.24   53.69
  -9   1   8  479.65   36.40
  -9   1   8  464.55   52.29
  -9   1   8  471.35   36.50
  -9  -1   8  489.45   36.40
  -9  -1   8  458.55   37.50
   9  -1  -8  460.65   37.50
   9  -1  -8  458.75   53.69
  -9  -1   8  484.25   51.59
   7   1  -6  816.72   61.49
   7   1  -6  871.71   68.79
  -7   1   6  803.92   61.59
  -7   1   6  785.52   61.49
   7   1  -6  753.42   62.09
  -7   1   6  799.62   62.19
  -7   1   6  777.02   69.19
  -7  -1   6  783.62   68.69
  -7  -1   6  775.02   62.09
   7  -1  -6  693.23   62.09
  -7  -1   6  790.22   61.59
  -7  -1   6  815.72   61.49
   7  -1  -6  791.72   69.79
  -5   1   4  213.18   18.00
  -5   1   4  228.28   17.60
   5   1  -4  215.78   18.00
  -5   1   4  223.88   17.50
   5   1  -4  226.48   17.50
  -5   1   4  230.68   24.10
   5   1  -4  219.98   22.90
  -5  -1   4  231.38   17.60
   5  -1  -4  242.88   24.50
   5  -1  -4  221.68   18.10
  -5  -1   4  223.78   23.20
  -3   1   2  971.30   84.89
   3   1  -2 1230.78   82.99
   3   1  -2  972.30   83.09
  -3   1   2 1017.60   83.19
   3  -1  -2 1002.20   83.19
   3  -1  -2 1139.79   82.99
  -3  -1   2  961.70   83.09
  -3  -1   2 1098.99   84.49
   3  -1  -2 1147.39   85.29
  -3  -1   2 1088.69   82.99
  -1   1   0  265.67   22.20
   1   1   0  254.97   22.10
  -1   1   0  320.47   22.00
   1   1   0  277.97   22.00
  -1   1   0  275.57   22.00
   1  -1   0  267.17   22.00
  -1  -1   0  235.98   22.60
  -1  -1   0  291.37   22.00
   1  -1   0  262.67   22.20
  -1  -1   0  280.57   22.10
   1  -1   0  311.67   22.00
  -1  -1   0  321.47   22.00
   1   1  -2  372.06   33.30
   1   1  -2  364.36   30.90
   1   1  -2  432.36   30.80
  -1   1   2  384.16   30.70
   1   1  -2  429.36   30.80
  -1   1   2  415.06   33.40
  -1   1   2  425.76   30.70
  -1   1   2  339.57   30.90
   1  -1  -2  410.46   30.70
   1  -1  -2  366.66   31.00
   1  -1  -2  374.36   30.70
  -1  -1   2  422.66   30.80
   1  -1  -2  359.76   33.20
  -1  -1   2  369.06   33.50
  -1  -1   2  402.86   30.80
  -3   1   4  671.73   53.09
   3   1  -4  618.84   48.20
   3   1  -4  647.64   53.09
  -3   1   4  674.93   48.20
  -3   1   4  572.94   48.60
  -3   1   4  602.54   48.20
   3   1  -4  549.54   48.50
   3  -1  -4  598.64   48.20
  -3  -1   4  612.14   48.20
  -3  -1   4  656.73   53.39
  -3  -1   4  665.63   48.20
   3  -1  -4  533.45   48.20
   3  -1  -4  670.93   53.49
  -3  -1   4  618.14   48.60
   5   1  -6  306.37   36.60
  -5   1   6  329.97   26.70
  -5   1   6  370.16   26.00
  -5   1   6  362.76   25.90
  -5   1   6  314.47   36.90
   5   1  -6  319.07   26.60
   5  -1  -6  258.57   37.00
  -5  -1   6  337.27   26.00
   5  -1  -6  299.37   26.60
  -5  -1   6  281.37   37.00
  -5  -1   6  355.86   26.00
   7   1  -8  582.04   58.19
  -7   1   8  549.65   41.50
  -7   1   8  574.24   42.70
  -7   1   8  536.65   41.60
  -7   1   8  458.15   55.99
   7   1  -8  465.75   42.30
   7  -1  -8  495.35   42.50
  -7  -1   8  522.05   41.60
   7  -1  -8  529.25   58.69
  -7  -1   8  563.54   41.50
  -7  -1   8  553.04   42.60
  -7  -1   8  525.35   57.79
  -9   1  10   68.09    5.60
  -9   1  10   81.59   36.60
   9   1 -10   59.79   37.00
  -9   1  10   65.59    9.80
  -9   1  10   73.99    5.40
   9  -1 -10  135.49   41.90
   9  -1 -10   53.29    8.50
  -9  -1  10   59.79    5.60
  -9  -1  10   76.79   35.80
  -9  -1  10   71.39    9.50
 -11   1  12   30.30    2.90
 -11   1  12   28.40   50.49
  11   1 -12    5.20   53.39
 -11   1  12   27.10    3.20
 -11   1  12   20.50    7.70
  11   1 -12   20.00    6.60
  11  -1 -12   32.00   57.09
 -11  -1  12  -10.10   48.40
 -11  -1  12   43.30    8.30
 -11  -1  12   29.40    3.20
 -11  -1  12   32.60    2.90
 -13   1  14   93.69   75.89
 -13   1  14   88.99    6.50
  13   1 -14   53.59   78.09
  13   1 -14   60.69   12.00
 -13   1  14   67.99    6.70
 -13   1  14   95.89   16.30
 -13  -1  14   81.19    6.40
 -13  -1  14   64.69    6.70
  13  -1 -14   34.30   79.39
 -13  -1  14   85.89   16.50
 -13  -1  14   98.09   76.09
 -15   1  16  108.99    9.90
 -15   1  16  113.79    9.50
 -15   1  16  122.99   25.50
 -15  -1  16  123.79   10.00
  15  -1 -16  108.29   22.80
 -17   1  18  147.79   13.10
 -17  -1  18  156.38   13.00
 -19   1  20    1.00    3.70
 -19  -1  20    4.40    3.80
 -21   1  22    4.90    4.80
 -21  -1  22   -0.40    5.50
 -22   2  21    4.70    4.80
 -22  -2  21    4.20    4.50
 -20   2  19   70.69    7.60
 -20  -2  19   61.39    7.80
 -18   2  17    2.40    2.80
  16   2 -15  205.78   25.10
 -16   2  15  229.08   20.00
 -16   2  15  195.58   90.39
 -16   2  15  268.77   19.80
  16  -2 -15  290.57   27.20
 -16  -2  15  239.48   20.20
 -16  -2  15  287.27   27.30
  16  -2 -15  429.66  110.79
  14   2 -13  222.38   20.30
  14   2 -13  230.48   65.89
 -14   2  13  236.28   67.69
 -14   2  13  188.38   16.80
 -14  -2  13  206.08   65.89
  14  -2 -13  249.48   78.59
 -14  -2  13  213.28   16.70
 -12   2  11  218.78   18.70
 -12   2  11  213.08   15.20
  12   2 -11  167.08   17.50
 -12   2  11  159.88   53.09
 -12   2  11  193.68   15.40
  12   2 -11  172.38   47.20
 -12  -2  11  147.59   46.40
  12  -2 -11  199.18   18.40
 -12  -2  11  194.48   15.50
  12  -2 -11  212.08   55.39
 -12  -2  11  165.78   18.00
 -10   2   9 2059.19  158.08
 -10   2   9 1958.60  158.18
  10   2  -9 1745.73  158.88
  10   2  -9 2092.89  158.08
 -10   2   9 1757.72  168.98
  10   2  -9 2410.86  170.18
 -10   2   9 2264.87  159.38
 -10  -2   9 1967.80  158.28
 -10  -2   9 2045.10  159.08
 -10  -2   9 1903.11  168.78
  10  -2  -9 2263.47  172.58
  10  -2  -9 1918.21  159.18
  -8   2   7  223.58   34.60
   8   2  -7  189.48   17.80
  -8   2   7  216.88   17.00
  -8   2   7  224.48   18.20
   8   2  -7  234.88   31.90
  -8   2   7  222.78   16.90
  -8  -2   7  218.08   32.80
   8  -2  -7  222.58   18.20
  -8  -2   7  210.68   17.10
   8  -2  -7  149.79   31.80
  -8  -2   7  230.08   16.90
  -6   2   5   61.49    6.60
   6   2  -5   69.69    5.50
  -6   2   5   71.89    5.50
  -6   2   5   27.10   17.40
   6   2  -5   68.89    6.20
  -6   2   5   65.39    5.50
   6   2  -5   66.79   14.20
  -6  -2   5   72.09    5.60
   6  -2  -5   66.79    6.50
  -6  -2   5   64.79    6.30
   6  -2  -5   61.59   17.50
  -6  -2   5   55.09   14.20
  -6  -2   5   78.59    5.40
  -4   2   3  231.48   19.60
  -4   2   3  241.68   24.40
   4   2  -3  224.28   19.40
   4   2  -3  281.87   19.10
  -4   2   3  246.38   19.20
   4   2  -3  254.27   22.30
  -4  -2   3  250.27   22.70
  -4  -2   3  219.48   19.40
   4  -2  -3  248.98   25.10
  -4  -2   3  259.77   19.20
   4  -2  -3  240.98   19.60
  -2   2   1 1063.59   88.09
  -2   2   1 1150.18   88.39
   2   2  -1 1322.47   88.09
  -2   2   1 1083.79   89.89
   2   2  -1 1176.78   88.59
   2   2  -1 1024.10   88.09
  -2  -2   1 1190.68   88.39
   2  -2  -1 1098.79   88.29
   2  -2  -1 1120.59   88.09
  -2  -2   1 1050.09   88.09
   0   2  -1 1553.44  126.49
   0   2  -1 1366.46  127.99
   0   2   1 1404.36  127.59
   0   2  -1 1696.23  126.49
   0   2   1 1617.04  126.49
   0  -2  -1 1519.05  127.69
   0  -2  -1 1840.62  126.49
   0  -2  -1 1759.12  126.69
   0  -2   1 1802.02  126.59
   2   2  -3 3272.37  258.17
  -2   2   3 3688.83  255.37
  -2   2   3 2989.20  255.37
  -2   2   3 3068.49  257.97
   2  -2  -3 3457.15  258.47
  -2  -2   3 3435.06  255.47
  -2  -2   3 2995.70  258.27
   4   2  -5 2093.09  161.58
  -4   2   5 1923.41  161.48
  -4   2   5 2140.79  156.68
   4   2  -5 1939.21  157.18
   4   2  -5 1962.20  156.68
  -4   2   5 2020.60  157.28
  -4   2   5 1981.40  156.68
   4  -2  -5 2136.99  162.38
   4  -2  -5 1868.11  157.18
  -4  -2   5 2042.80  156.68
  -4  -2   5 1985.10  161.98
  -4  -2   5 2021.20  156.78
  -6   2   7  869.81   75.89
   6   2  -7  874.11   75.59
   6   2  -7  759.62   66.19
  -6   2   7  828.62   65.59
  -6   2   7  909.41   65.59
  -6   2   7  836.42   66.39
  -6  -2   7  845.92   65.69
  -6  -2   7  877.91   76.49
  -6  -2   7  832.92   65.59
  -6  -2   7  832.12   66.29
   6  -2  -7  807.42   66.29
   6  -2  -7  838.02   77.29
   8   2  -9    4.70    3.70
  -8   2   9    1.30    4.30
  -8   2   9    3.00    0.70
  -8   2   9   -2.00   29.40
   8   2  -9   21.00   29.30
  -8   2   9    4.60    1.00
   8  -2  -9   10.50   34.30
  -8  -2   9    0.10    3.90
  -8  -2   9    2.20    0.70
   8  -2  -9    3.40    3.80
  -8  -2   9    2.50    1.00
  -8  -2   9    6.30   29.20
 -10   2  11  259.97   20.00
  10   2 -11  240.68   22.30
 -10   2  11  197.38   50.99
 -10   2  11  269.37   20.10
 -10   2  11  284.37   23.30
  10   2 -11  347.47   53.49
 -10  -2  11  244.88   20.10
  10  -2 -11  224.88   22.20
 -10  -2  11  249.08   20.00
 -10  -2  11  255.27   53.19
  10  -2 -11  304.67   56.99
 -12   2  13   75.89    6.20
 -12   2  13   35.80   62.69
  12   2 -13   89.89   65.29
  12   2 -13   62.69   13.10
 -12   2  13   85.49    6.40
 -12   2  13   73.19   14.00
  12  -2 -13   54.09   12.00
 -12  -2  13   60.89    6.40
 -12  -2  13   79.59    6.10
  12  -2 -13   94.19   69.79
 -12  -2  13   35.40   60.99
 -12  -2  13   80.19   14.40
 -14   2  15  375.06   31.00
 -14   2  15  464.45   38.30
 -14   2  15  387.06   30.90
 -14   2  15  179.38   96.69
 -14  -2  15  431.96   36.30
  14  -2 -15  298.37  151.38
 -14  -2  15  351.96   31.10
 -14  -2  15  403.86   30.80
 -16   2  17   15.50    3.20
 -16   2  17   18.90    2.60
 -16  -2  17   18.80    3.30
 -18   2  19   50.69    6.80
 -18  -2  19   60.59    7.10
 -20   2  21   78.89    9.60
 -20  -2  21   93.09   10.10
 -21   3  20   -1.40    4.10
 -21  -3  20   -0.80    4.20
 -19   3  18    5.50    3.10
 -19  -3  18   -1.10    3.30
 -17   3  16   13.10    2.20
 -17   3  16  -27.40  107.79
 -17   3  16   16.40   17.30
 -17   3  16   13.80    2.70
  17  -3 -16   67.79  144.59
  17  -3 -16    9.70   14.00
 -17  -3  16   10.60    2.90
 -15   3  14   69.99   13.60
 -15   3  14   70.79    6.50
 -15   3  14  139.29   77.59
  15   3 -14   81.09   15.30
 -15   3  14   79.29    6.00
  15  -3 -14   53.89   11.80
 -15  -3  14   67.29    6.60
 -15  -3  14   66.79   12.40
  15  -3 -14  108.79   91.99
  13   3 -12   39.80   50.39
 -13   3  12  112.29   55.09
 -13   3  12   24.20    8.60
 -13   3  12   22.50    2.40
 -13   3  12   25.90    2.90
  13   3 -12   15.80    6.60
  13  -3 -12   26.30   61.99
  13  -3 -12   22.50    7.70
 -13  -3  12   15.30   50.89
 -13  -3  12   19.90    3.10
 -13  -3  12   21.90    6.90
  11   3 -10  138.39   14.20
 -11   3  10  155.08   12.40
 -11   3  10  171.48   42.60
  11   3 -10  237.38   40.60
  11   3 -10  162.38   12.20
  11  -3 -10  241.28   48.50
 -11  -3  10  141.79   12.50
  11  -3 -10  175.58   15.20
 -11  -3  10  149.99   40.20
   9   3  -8  226.58   19.50
  -9   3   8  259.57   42.00
   9   3  -8  234.58   20.50
  -9   3   8  244.98   19.50
   9   3  -8  305.07   40.00
  -9   3   8  278.37   21.20
  -9   3   8  240.98   19.60
  -9  -3   8  243.88   19.70
   9  -3  -8  280.17   47.80
   9  -3  -8  248.58   21.00
  -9  -3   8  275.37   20.70
  -9  -3   8  240.48   19.50
  -9  -3   8  270.67   41.90
   7   3  -6  686.93   48.20
  -7   3   6  611.54   48.20
  -7   3   6  591.34   48.30
  -7   3   6  628.94   49.10
   7   3  -6  551.24   48.70
   7   3  -6  689.73   55.99
  -7  -3   6  628.84   48.80
   7  -3  -6  625.54   59.99
   7  -3  -6  614.24   49.10
  -7  -3   6  543.85   55.79
  -5   3   4  131.59   11.30
   5   3  -4  146.09   17.00
  -5   3   4  145.09   10.60
  -5   3   4  114.79   20.90
   5   3  -4  125.69   10.90
  -5  -3   4  128.39   10.60
   5  -3  -4  138.59   11.30
   5  -3  -4  146.79   22.30
  -3   3   2    2.40    1.30
  -3   3   2    3.20    7.30
   3   3  -2    1.20    0.60
   3   3  -2    3.30    3.40
  -3  -3   2   -0.10    0.40
  -3  -3   2    0.40    4.50
  -3  -3   2    1.50    0.60
   3  -3  -2    0.80    1.10
  -1   3   0   20.60    6.00
  -1   3   0   14.70    1.80
  -1   3   0   15.00    1.30
   1   3   0   16.50    1.40
   1   3   0   18.80    1.40
   1  -3   0   14.80    1.40
  -1  -3   0   15.50    1.40
   1  -3   0   11.50    1.80
   1  -3   0   11.10    6.50
  -1  -3   0   17.60    3.30
  -1   3   2 1127.09   87.19
   1   3  -2 1099.19   87.49
   1   3  -2 1065.89   84.89
  -1   3   2 1085.19   84.99
  -1   3   2 1002.90   84.69
  -1  -3   2 1093.89   84.79
  -1  -3   2 1075.69   84.69
  -1  -3   2 1000.30   87.29
  -1  -3   2 1139.79   84.99
   1  -3  -2 1109.09   87.39
   1  -3  -2 1153.28   84.69
   1  -3  -2 1045.00   84.99
   3   3  -4  974.10   82.19
   3   3  -4  937.21   77.99
  -3   3   4  988.10   77.69
  -3   3   4 1043.00   82.49
  -3   3   4 1060.79   77.69
  -3   3   4  971.20   78.09
   3  -3  -4 1162.38   83.59
  -3  -3   4  995.20   77.69
  -3  -3   4  947.61   82.79
  -3  -3   4  980.90   77.69
   3  -3  -4  989.50   78.09
  -3  -3   4  918.11   77.99
  -5   3   6  528.05   51.19
  -5   3   6  513.35   41.20
   5   3  -6  579.14   51.49
  -5   3   6  551.54   41.20
   5   3  -6  491.15   41.70
  -5   3   6  558.24   42.00
  -5  -3   6  516.15   41.20
   5  -3  -6  512.85   41.90
   5  -3  -6  583.34   53.49
  -5  -3   6  563.24   41.20
  -5  -3   6  466.45   41.70
  -5  -3   6  504.85   51.19
  -7   3   8   89.19    6.30
  -7   3   8   92.79   28.20
  -7   3   8   73.39    8.60
   7   3  -8   83.09   26.50
   7   3  -8   73.99    8.00
  -7   3   8   71.89    6.20
   7  -3  -8   71.59    8.40
  -7  -3   8   86.39   28.60
  -7  -3   8   79.49    6.20
   7  -3  -8   61.99   31.00
  -7  -3   8   77.19    6.40
  -9   3  10  116.79    8.90
  -9   3  10  105.59   12.70
   9   3 -10   97.09   11.30
  -9   3  10  144.79   41.20
   9   3 -10  113.49   37.60
   9  -3 -10  110.49   11.70
  -9  -3  10   69.79   39.30
  -9  -3  10  111.59   11.60
  -9  -3  10  105.99    9.00
   9  -3 -10  154.18   44.70
  -9  -3  10  116.09    8.80
 -11   3  12  216.88   20.30
 -11   3  12  195.28   15.10
  11   3 -12  120.79   56.69
 -11   3  12  170.38   57.59
 -11   3  12  195.88   15.20
 -11  -3  12  185.68   15.30
 -11  -3  12  159.48   22.30
 -13   3  14   33.40    3.70
  13   3 -14   17.70    9.30
 -13   3  14   35.60    3.40
 -13   3  14   39.70   12.60
 -13   3  14  113.29   72.99
 -13  -3  14   29.20    4.10
  13  -3 -14    7.60   89.59
 -13  -3  14   34.10    3.10
  13  -3 -14   23.00    9.90
 -15   3  16   45.80    4.30
 -15   3  16  142.99  109.49
 -15   3  16   38.00   27.40
 -15   3  16   33.40    4.70
 -15  -3  16   30.40    5.00
  15  -3 -16  -89.39  134.69
 -17   3  18   14.50    3.40
 -17  -3  18   12.20    3.60
 -19   3  20   32.30    5.10
 -19  -3  20   38.10    5.30
 -21   3  22    7.00    5.30
 -22   4  21    3.00    4.60
 -22  -4  21    1.80    6.00
 -20   4  19    2.60    3.70
 -20  -4  19    4.70    4.10
 -18   4  17  226.48   18.30
 -18  -4  17  223.48   18.60
 -16   4  15  154.58   99.79
 -16   4  15  155.08   11.80
 -16   4  15  132.09   12.10
  16  -4 -15  135.49   28.40
  16  -4 -15  153.78  119.79
 -16  -4  15  152.38   12.30
 -14   4  13    3.30    1.70
  14   4 -13   -2.00    7.50
 -14   4  13  -27.70   60.89
 -14   4  13    1.90    1.20
 -14   4  13   -2.30    9.70
 -14  -4  13    2.20    2.00
  14  -4 -13    5.90   78.79
  14  -4 -13   -6.50    8.80
 -14  -4  13   -1.60    8.70
  12   4 -11  154.08   45.10
  12   4 -11  149.79   15.10
 -12   4  11  183.98   17.30
 -12   4  11   89.69   49.50
 -12   4  11  158.78   12.20
 -12   4  11  154.08   12.30
 -12  -4  11  129.59   52.79
  12  -4 -11  304.57   62.89
  12  -4 -11  135.39   16.10
 -12  -4  11  159.28   15.20
 -12  -4  11  142.59   12.50
 -10   4   9  279.77   22.20
 -10   4   9  235.98   42.60
  10   4  -9  233.38   19.90
 -10   4   9  249.28   20.00
 -10   4   9  251.27   19.90
  10   4  -9  248.68   21.30
  10   4  -9  297.67   46.80
  10  -4  -9  284.47   22.70
 -10  -4   9  319.87   48.80
  10  -4  -9  331.47   58.89
 -10  -4   9  229.98   21.20
 -10  -4   9  253.97   20.10
  -8   4   7  438.76   35.70
  -8   4   7  471.65   50.99
   8   4  -7  532.65   47.60
   8   4  -7  436.96   36.40
   8   4  -7  504.95   35.70
  -8   4   7  432.96   35.70
  -8  -4   7  505.95   49.99
   8  -4  -7  540.65   56.59
  -8  -4   7  432.36   36.40
   8  -4  -7  437.96   36.80
  -8  -4   7  433.86   35.80
   6   4  -5 2108.09  177.58
  -6   4   5 2441.96  177.98
  -6   4   5 2283.07  177.28
   6   4  -5 2386.86  180.98
  -6   4   5 2203.08  182.78
  -6  -4   5 2100.49  181.48
   6  -4  -5 2347.57  177.98
  -6  -4   5 2295.47  177.38
   4   4  -3  520.15   39.60
  -4   4   3  403.16   42.90
   4   4  -3  490.25   37.60
  -4   4   3  463.15   38.00
  -4   4   3  463.95   37.50
  -4  -4   3  474.05   37.50
  -4  -4   3  542.55   37.60
  -4  -4   3  434.36   40.70
   4  -4  -3  487.95   38.00
  -2   4   1 4282.97  303.77
  -2   4   1 3591.04  305.77
  -2   4   1 3680.53  303.47
   2  -4  -1 4455.35  303.87
   2  -4  -1 3422.16  305.77
   0   4  -1  554.14   45.30
   0   4  -1  683.53   48.90
   0   4   1  545.05   45.30
   0   4  -1  574.14   48.00
   0   4   1  589.04   45.50
   0  -4  -1  622.14   47.70
   0  -4   1  508.25   45.50
   0  -4  -1  559.64   45.40
   0  -4   1  609.84   45.30
   0  -4   1  577.14   45.50
  -2   4   3   17.30    9.70
  -2   4   3   14.20    1.40
   2   4  -3    8.10    9.90
   2   4  -3   20.30    2.40
  -2   4   3   15.30    1.40
  -2   4   3   12.60    2.60
   2  -4  -3   14.30    2.50
  -2  -4   3   15.10    1.40
  -2  -4   3   23.10   11.50
   2  -4  -3    7.80   11.10
  -2  -4   3   15.20    1.60
  -2  -4   3   18.90    2.50
   4   4  -5   18.80    3.20
  -4   4   5   18.50    3.90
  -4   4   5    6.70   14.90
  -4   4   5   21.60    1.70
  -4   4   5   15.00    1.70
  -4  -4   5   26.30    3.50
  -4  -4   5   18.60    1.90
  -4  -4   5   19.90    1.70
   4  -4  -5   16.90    3.60
  -4  -4   5   27.50   17.10
   4  -4  -5   19.80   17.10
   6   4  -7 1003.80   81.89
  -6   4   7  988.90   91.29
  -6   4   7 1099.59   81.29
  -6   4   7 1093.89   82.29
   6   4  -7 1171.08   91.69
  -6   4   7  992.80   81.29
  -6  -4   7  982.30   93.39
   6  -4  -7  910.91   82.09
  -6  -4   7 1079.89   81.99
  -6  -4   7 1106.19   81.29
  -6  -4   7 1026.30   81.39
  -8   4   9  190.08   15.90
   8   4  -9  200.28   17.40
  -8   4   9  227.08   39.40
   8   4  -9  172.88   36.10
  -8   4   9  222.58   18.50
  -8   4   9  225.28   16.10
  -8  -4   9  213.48   17.70
   8  -4  -9  204.78   17.90
  -8  -4   9  171.68   15.90
  -8  -4   9  204.58   16.10
  -8  -4   9  214.08   41.90
   8  -4  -9  183.38   45.10
  10   4 -11  819.62  124.79
 -10   4  11  888.61   63.69
 -10   4  11  771.32   61.29
 -10   4  11  733.63   92.89
 -10   4  11  804.82   61.29
  10  -4 -11  730.53   62.99
 -10  -4  11  737.03   94.29
  10  -4 -11  854.41  105.29
 -10  -4  11  737.63   61.39
  12   4 -13  231.98   23.70
 -12   4  13  240.38   20.30
 -12   4  13  292.17   26.10
 -12   4  13  260.57   20.20
 -12  -4  13  251.77   20.50
  12  -4 -13  243.98   24.30
 -12  -4  13  288.27   20.10
 -12  -4  13  231.88   24.60
  12  -4 -13  333.37   89.29
 -14   4  15  110.79    8.50
 -14   4  15   84.79   97.69
 -14   4  15  101.99    8.80
 -14   4  15  117.89   23.20
  14  -4 -15   98.29  120.79
 -14  -4  15   96.39    8.50
 -14  -4  15   97.79    9.10
 -16   4  17    1.30    2.40
 -16   4  17    3.60    2.80
 -16  -4  17   -1.20    2.90
 -18   4  19    1.70    3.50
 -18  -4  19   -4.00    3.70
 -20   4  21    4.20    4.80
 -20  -4  21    8.10    5.10
 -21   5  20   34.40    5.20
 -21  -5  20   29.40    5.60
 -19   5  18  149.99   12.60
 -19  -5  18  143.49   13.20
 -17   5  16    3.80    2.50
 -17   5  16    5.10    2.10
 -17  -5  16    2.60    2.90
 -15   5  14  346.87   29.10
 -15   5  14  352.46   94.89
 -15   5  14  359.66   28.90
 -15   5  14  429.86   36.40
  15  -5 -14  328.57   34.00
  15  -5 -14  450.05  116.09
 -15  -5  14  394.06   33.40
 -13   5  12  264.07   21.30
  13   5 -12  233.38   23.80
 -13   5  12  314.57   26.50
 -13   5  12  268.77   66.29
 -13   5  12  270.57   21.20
 -13  -5  12  258.67   21.50
  13  -5 -12  272.47   25.40
 -13  -5  12  284.17   24.10
 -11   5  10   10.80    1.50
 -11   5  10   14.00    6.60
 -11   5  10   11.50    1.60
 -11   5  10   39.20   42.40
  11   5 -10   16.30   35.30
  11  -5 -10   -9.70   47.80
 -11  -5  10    8.60    4.50
 -11  -5  10   10.40    1.90
  11  -5 -10   16.20    6.00
  -9   5   8  256.97   21.70
  -9   5   8  256.47   21.70
   9   5  -8  298.07   40.10
   9   5  -8  274.77   22.70
  -9   5   8  267.27   48.60
  -9   5   8  318.97   23.70
   9  -5  -8  390.56   57.09
  -9  -5   8  258.87   21.90
  -9  -5   8  307.57   22.80
   9  -5  -8  261.27   23.40
  -9  -5   8  250.17   46.10
   7   5  -6  401.46   40.10
   7   5  -6  413.66   32.50
  -7   5   6  397.16   46.30
  -7   5   6  416.56   32.00
  -7  -5   6  395.96   32.10
   7  -5  -6  518.15   52.69
  -7  -5   6  404.96   32.50
  -7  -5   6  365.76   43.80
   7  -5  -6  411.06   33.10
  -5   5   4  998.00   74.59
   5   5  -4  979.90   74.79
  -5   5   4  886.21   75.69
  -5   5   4  924.31   80.99
  -5  -5   4  961.40   74.69
   5  -5  -4  969.60   75.19
  -5  -5   4  952.10   74.79
  -3   5   2 4126.59  352.96
  -3   5   2 4406.26  355.86
   3   5  -2 4542.95  352.96
   3   5  -2 5343.27  353.06
   3  -5  -2 4053.89  352.96
   3  -5  -2 4649.33  356.46
  -1   5   0   32.70    2.70
   1   5   0   29.30    2.70
   1   5   0   30.20    2.90
  -1   5   0   33.90    3.40
   1   5   0   22.40    5.70
   1  -5   0   35.00    3.40
  -1  -5   0   38.30    2.80
   1  -5   0   36.40   11.30
  -1  -5   0   25.30    6.30
  -1   5   2  423.96   31.70
   1   5  -2  377.26   31.30
   1   5  -2  386.86   36.60
  -1   5   2  393.46   31.30
   1   5  -2  411.66   35.90
  -1  -5   2  404.46   31.40
   1  -5  -2  455.15   37.10
  -1  -5   2  406.16   31.70
  -1  -5   2  364.06   31.60
   1  -5  -2  402.76   31.60
   3   5  -4   77.19    6.70
  -3   5   4   91.49   17.20
  -3   5   4   70.79    6.00
   3   5  -4   61.09   15.80
  -3   5   4   85.49    7.20
  -3   5   4   78.59    6.10
   3  -5  -4   81.99   19.00
  -3  -5   4   76.09    6.80
  -3  -5   4   55.89   17.00
   3  -5  -4   60.89    6.90
  -5   5   6   41.80    3.30
  -5   5   6   11.40   19.50
   5   5  -6   51.19   18.90
  -5   5   6   32.70    5.80
  -5   5   6   44.50    3.40
  -5  -5   6   22.70   22.20
  -5  -5   6   42.40    5.10
   5  -5  -6   43.20   24.40
   5  -5  -6   43.40    6.10
  -5  -5   6   41.10    3.60
  -5  -5   6   35.00    3.30
   7   5  -8 1541.75  128.69
  -7   5   8 1518.65  127.99
  -7   5   8 1756.22  129.19
  -7   5   8 1812.42  127.99
  -7   5   8 1592.74  139.19
   7   5  -8 1757.52  138.29
  -7  -5   8 1636.24  128.79
   7  -5  -8 1803.02  144.39
  -7  -5   8 1692.43  127.99
  -7  -5   8 1549.84  128.09
  -7  -5   8 1488.15  141.09
   7  -5  -8 1555.24  128.99
  -9   5  10  497.75   37.00
  -9   5  10  344.47   67.09
   9   5 -10  469.05   39.60
  -9   5  10  470.95   37.00
  -9  -5  10  493.55   75.19
   9  -5 -10  617.14   82.69
  -9  -5  10  513.55   38.60
  -9  -5  10  441.06   36.90
  -9  -5  10  465.05   37.10
   9  -5 -10  452.15   38.80
 -11   5  12  158.38   61.09
  11   5 -12  139.39   16.60
 -11   5  12  160.58   13.10
 -11   5  12  167.88   13.00
  11  -5 -12  235.08   75.09
 -11  -5  12  157.58   17.20
 -11  -5  12  159.08   13.20
 -11  -5  12  179.68   12.90
  11  -5 -12  157.48   17.60
  13   5 -14  144.69   20.40
 -13   5  14  182.48   14.90
 -13   5  14   81.09   85.99
 -13   5  14  234.98   25.40
 -13   5  14  199.78   14.80
 -13  -5  14  177.78   15.10
  13  -5 -14  173.88  107.39
 -15   5  16   16.70    2.50
 -15   5  16   15.90    2.80
 -15  -5  16   11.70    3.30
 -17   5  18   43.10    5.30
 -17  -5  18   37.70    5.10
 -19   5  20   43.00    5.70
 -19  -5  20   48.00    6.50
 -22   6  21   19.80    5.50
 -20   6  19    1.70    3.70
 -18  -6  17   12.70    3.70
 -16   6  15  132.89   10.90
 -16   6  15  140.09   10.60
 -16  -6  15  114.09   11.20
  14   6 -13   40.70    9.00
 -14   6  13   39.30    3.80
 -14   6  13  -62.49   72.69
 -14   6  13   39.90    4.20
 -14   6  13   45.00   13.10
 -14  -6  13   38.00    4.70
 -14  -6  13   53.49    9.50
  14  -6 -13   40.60   11.20
  14  -6 -13   48.90  100.39
  12   6 -11   45.10    7.00
 -12   6  11   63.89   51.09
 -12   6  11   30.60    3.50
 -12   6  11   36.80    3.20
 -12   6  11   40.10    9.30
  12  -6 -11   41.40   63.99
 -12  -6  11   32.20    3.90
  12  -6 -11   26.10    8.50
 -12  -6  11   36.10    6.90
  10   6  -9   18.70   29.40
 -10   6   9   26.80   36.30
 -10   6   9   25.20    2.70
 -10   6   9   26.50    2.60
  10   6  -9   25.00    5.10
 -10   6   9   33.50    6.90
 -10  -6   9   31.50    6.30
 -10  -6   9   14.50   37.10
  10  -6  -9   51.49   46.70
  10  -6  -9   36.90    6.80
 -10  -6   9   30.50    3.30
   8   6  -7  179.68   29.10
  -8   6   7  121.69   11.90
  -8   6   7  116.99    9.50
   8   6  -7  116.79   10.60
  -8   6   7  107.69    9.40
  -8   6   7  112.89   30.60
   8  -6  -7  126.29   36.50
  -8  -6   7  135.19   10.60
  -8  -6   7   83.29   28.50
  -8  -6   7  115.59    9.60
  -6   6   5 1128.79   84.99
  -6   6   5 1084.89   92.79
   6   6  -5 1183.28   84.49
  -6   6   5 1083.29   84.19
   6  -6  -5 1071.69   84.99
  -6  -6   5 1033.60   84.39
  -6  -6   5 1068.69   84.29
  -6  -6   5  941.71   90.09
   4   6  -3   56.39    9.40
  -4   6   3   56.69    6.10
   4   6  -3   73.69   10.30
  -4   6   3   46.60   17.60
  -4   6   3   54.79    5.10
  -4  -6   3   70.09    5.20
  -4  -6   3   64.79    5.20
  -4  -6   3   59.99    5.10
  -4  -6   3   70.39    5.20
   4  -6  -3   82.69   19.70
   4  -6  -3   57.69    6.20
   2   6  -1  219.08   18.30
  -2   6   1  233.38   18.30
   2   6  -1  213.88   19.00
  -2   6   1  245.18   18.80
  -2   6   1  234.48   25.60
   2   6  -1  230.58   19.50
   2  -6  -1  241.88   18.80
  -2  -6   1  246.08   18.40
   0   6   1  352.76   27.00
   0   6  -1  322.87   33.60
   0   6  -1  337.57   32.20
   0   6   1  357.86   30.90
   0   6   1  362.36   27.30
   0   6  -1  318.57   27.00
   0  -6   1  341.57   27.00
   0  -6  -1  370.56   31.80
   0  -6  -1  358.56   27.20
   0  -6   1  318.47   27.40
   0  -6   1  344.37   27.30
  -2   6   3  383.56   36.70
   2   6  -3  394.56   39.80
  -2   6   3  327.27   28.90
   2   6  -3  332.07   35.80
  -2   6   3  399.46   29.50
   2   6  -3  347.77   28.90
   2  -6  -3  411.16   39.50
  -2  -6   3  396.06   29.30
  -2  -6   3  362.96   29.30
  -2  -6   3  391.36   29.00
   2  -6  -3  349.37   29.40
   4   6  -5   93.39    7.70
  -4   6   5   80.89    6.50
  -4   6   5   82.39    8.10
   4   6  -5   79.19   19.10
  -4   6   5   74.19    6.50
  -4   6   5   74.49   21.00
  -4  -6   5   80.49   22.10
  -4  -6   5   81.69    6.70
   4  -6  -5  114.99   25.10
  -4  -6   5   79.49    7.60
   4  -6  -5   79.69    7.90
  -6   6   7  304.57   24.40
   6   6  -7  317.37   25.30
  -6   6   7  292.47   45.70
   6   6  -7  321.77   42.20
  -6   6   7  310.37   24.40
  -6   6   7  345.97   26.00
   6  -6  -7  282.47   25.70
  -6  -6   7  313.97   24.60
  -6  -6   7  305.97   25.30
   8   6  -9   31.30    6.60
  -8   6   9   31.20    2.70
   8   6  -9    7.60   51.19
  -8   6   9   29.80    2.80
  -8   6   9   39.40   34.60
  -8  -6   9   28.70    3.30
   8  -6  -9   94.19   44.10
  -8  -6   9   34.40    6.90
   8  -6  -9   23.50    6.10
  -8  -6   9   -1.90   39.20
 -10   6  11  668.53   48.50
  10   6 -11  631.94   50.09
 -10   6  11  492.55   88.09
 -10   6  11  637.24   48.40
  10  -6 -11  591.64   50.49
 -10  -6  11  630.04   48.60
 -10  -6  11  415.06   82.59
 -12   6  13   28.80    3.50
 -12   6  13   20.40    3.30
 -12   6  13   17.40   11.60
  12   6 -13   19.20    9.10
 -12   6  13   63.29   74.89
 -12  -6  13   31.00    3.80
 -12  -6  13   25.40    9.40
  12  -6 -13    6.50   96.19
  12  -6 -13   18.60    9.50
 -14   6  15   14.20    2.70
 -14   6  15   18.90    2.90
 -14  -6  15   18.80    3.20
 -16   6  17    7.10    3.00
 -16   6  17   11.30    2.60
 -16  -6  17   10.50    3.50
 -18   6  19   18.30    4.20
 -18  -6  19   16.20    4.80
 -19   7  18   45.10    6.70
 -19  -7  18   53.19    6.30
 -17   7  16   28.80    3.70
 -17   7  16   25.70    3.80
 -17  -7  16   21.20    4.20
 -15   7  14    9.80    1.80
 -15   7  14    7.40    2.20
 -15  -7  14    9.10    2.90
 -13   7  12  -17.00   68.29
  13   7 -12    1.70    7.30
 -13   7  12    0.20   16.20
 -13  -7  12   11.00    7.00
  13  -7 -12   15.70    9.70
  13  -7 -12    3.10   87.49
 -11   7  10  832.52  101.69
  11   7 -10  934.71   70.69
 -11   7  10  862.41   69.59
 -11   7  10  849.72   69.49
  11  -7 -10 1132.09  120.79
 -11  -7  10  863.71   69.79
  11  -7 -10  860.71   73.19
 -11  -7  10  934.61   70.69
  -9   7   8  172.88   13.80
  -9   7   8  203.38   17.10
   9   7  -8  129.59   37.50
  -9   7   8  160.58   13.80
   9   7  -8  201.68   15.20
  -9   7   8  178.68   40.30
  -9  -7   8   97.69   39.80
   9  -7  -8  285.77   53.39
  -9  -7   8  165.48   14.00
   9  -7  -8  158.18   16.30
  -9  -7   8  170.88   15.00
  -7   7   6  133.89   10.50
  -7   7   6  107.99   29.20
   7   7  -6  133.39   11.30
   7   7  -6  163.88   24.70
  -7  -7   6   96.29   26.40
  -7  -7   6  122.59   10.70
   7  -7  -6  134.09   12.40
  -7  -7   6  139.89   11.20
  -5   7   4   14.00   25.90
  -5   7   4    6.80    2.80
   5   7  -4   13.60    8.00
  -5  -7   4   12.10    1.80
   5  -7  -4    5.20   22.30
   5  -7  -4   12.00    3.10
  -5  -7   4   11.40    2.00
  -5  -7   4   14.20    1.80
  -3   7   2  373.36   31.00
   3   7  -2  365.56   31.00
  -3   7   2  395.66   39.80
  -3   7   2  432.26   31.70
   3  -7  -2  412.76   41.70
  -3  -7   2  395.76   31.10
   3  -7  -2  411.46   31.60
  -1   7   0 1517.25  112.19
  -1   7   0 1397.76  115.59
   1   7   0 1354.46  111.79
   1   7   0 1374.36  113.39
  -1   7   0 1350.46  111.79
   1   7   0 1619.94  111.99
  -1  -7   0 1389.76  114.29
  -1  -7   0 1558.54  111.89
  -1  -7   0 1395.36  111.89
   1  -7   0 1396.56  112.19
   1  -7   0 1385.26  117.39
   1   7  -2  293.07   23.50
   1   7  -2  357.86   33.40
  -1   7   2  286.57   23.50
  -1   7   2  248.38   30.80
   1   7  -2  308.77   30.50
  -1   7   2  302.87   23.90
   1  -7  -2  291.67   23.90
  -1  -7   2  305.97   23.90
  -1  -7   2  295.37   24.00
   1  -7  -2  308.47   33.40
  -1  -7   2  316.07   23.60
  -3   7   4   65.19    5.70
  -3   7   4   79.49   20.20
   3   7  -4   99.99   18.40
   3   7  -4   64.99    5.70
   3   7  -4  101.89   18.40
  -3   7   4   84.79    7.30
  -3  -7   4   70.39    6.70
   3  -7  -4   71.59    6.90
  -3  -7   4   66.59    6.80
  -3  -7   4   71.09    5.80
  -5   7   6 1132.89   90.49
   5   7  -6 1164.08   98.69
   5   7  -6 1247.18   91.19
  -5   7   6 1282.97   91.49
  -5   7   6 1103.89   90.49
  -5   7   6 1172.28  101.49
  -5  -7   6 1034.10  102.49
  -5  -7   6 1093.49   90.59
   5  -7  -6 1135.49   91.39
  -5  -7   6 1152.28   90.99
   5  -7  -6 1222.38  105.99
   7   7  -8  169.88   16.00
  -7   7   8  208.18   39.40
  -7   7   8  198.08   14.50
  -7   7   8  184.68   14.40
  -7  -7   8  191.18   44.90
  -7  -7   8  185.88   16.10
  -7  -7   8  171.88   14.70
   7  -7  -8  172.98   16.60
   7  -7  -8  291.07   49.50
  -9   7  10  100.09    8.50
   9   7 -10  112.79   12.00
  -9   7  10  110.59   14.70
  -9   7  10   88.09   47.50
  -9   7  10   99.19    8.60
  -9  -7  10  101.89    8.90
  -9  -7  10  110.99   12.20
   9  -7 -10  206.48   64.89
  -9  -7  10   97.09   55.19
   9  -7 -10  127.39   13.30
 -11   7  12  -39.30   65.49
  11   7 -12   11.60    7.40
 -11  -7  12   14.30    8.00
  11  -7 -12   -4.80   85.89
 -13   7  14   63.39    5.10
 -13   7  14   49.50    5.40
 -13  -7  14   47.90    6.10
 -15   7  16  260.77   19.50
 -15   7  16  230.58   19.70
 -15  -7  16  237.98   20.10
 -17   7  18   35.90    5.80
 -17   7  18   40.00    5.30
 -17  -7  18   34.10    5.30
 -19  -7  20    5.80    6.10
 -20   8  19   16.70    4.60
 -20  -8  19   13.50    5.50
 -18   8  17   54.89    5.80
 -18   8  17   50.79    6.40
 -18  -8  17   50.49    7.40
 -16   8  15   66.19    6.80
 -16   8  15   70.49    6.30
 -16  -8  15   72.49    7.80
 -14   8  13  175.68   14.60
 -14   8  13  184.48   14.50
 -14  -8  13  182.78   15.10
 -12   8  11   22.90   61.89
 -12   8  11    1.90    1.20
  12   8 -11    4.50    6.50
 -12   8  11    0.20    1.40
  12  -8 -11   20.80   84.09
 -12  -8  11    0.20    2.30
 -12  -8  11    4.90    6.10
 -10   8   9  332.77   24.10
 -10   8   9  266.07   55.59
 -10   8   9  291.87   24.00
  10   8  -9  306.47   25.60
 -10  -8   9  292.17   24.30
  10  -8  -9  293.27   26.70
 -10  -8   9  232.68   69.89
 -10  -8   9  316.67   25.30
  10  -8  -9  388.46   72.29
  -8   8   7  662.73   54.19
  -8   8   7  769.82   55.89
  -8   8   7  611.84   74.99
   8  -8  -7  718.73   55.59
  -8  -8   7  666.13   54.29
  -8  -8   7  662.23   72.69
   6   8  -5   90.39   16.80
   6   8  -5  114.59   19.80
  -6   8   5   94.39    7.30
  -6   8   5   82.99   26.00
   6  -8  -5   92.59    9.40
  -6  -8   5   91.59    7.50
  -6  -8   5   74.89    7.70
   6  -8  -5  149.69   36.50
  -6  -8   5   92.39    7.50
   4   8  -3  108.49    9.30
  -4   8   3  115.59   23.00
  -4   8   3  125.99   10.60
  -4   8   3  114.09    9.30
  -4  -8   3  106.99    9.40
   4  -8  -3  155.48   27.20
   4  -8  -3  129.89   10.60
  -2   8   1  160.28   13.80
  -2   8   1  200.98   14.60
   2   8  -1  172.68   13.80
  -2   8   1  165.58   26.40
   2  -8  -1  196.08   32.20
   2  -8  -1  159.58   14.40
  -2  -8   1  180.98   13.90
   0   8  -1   15.50    1.70
   0   8  -1   32.50   17.50
   0   8  -1   14.50   13.30
   0   8   1   21.70   11.90
   0   8   1   11.60    1.70
   0   8   1   17.20    2.50
   0  -8  -1   16.10    2.80
   0  -8   1   16.80    3.00
   0  -8   1   21.30    3.20
   0  -8   1   18.40    1.90
   0  -8  -1   21.00   14.40
   2   8  -3 1962.80  145.19
   2   8  -3 1876.21  146.09
  -2   8   3 1730.73  146.39
  -2   8   3 1873.41  141.59
   2   8  -3 1680.33  141.09
  -2   8   3 1762.32  141.09
   2  -8  -3 2066.79  148.89
   2  -8  -3 1738.43  141.59
  -2  -8   3 1763.32  141.39
  -2  -8   3 1735.33  141.39
  -2  -8   3 1755.72  141.19
  -4   8   5  411.76   51.09
   4   8  -5  419.66   34.90
  -4   8   5  505.25   36.10
   4   8  -5  462.05   48.20
   4   8  -5  473.05   47.10
  -4   8   5  452.95   34.90
  -4  -8   5  396.16   35.60
  -4  -8   5  447.86   35.50
   4  -8  -5  448.86   35.90
  -4  -8   5  448.06   35.10
  -6   8   7  119.29    9.50
   6   8  -7  122.79   28.60
  -6   8   7  124.69    9.50
   6   8  -7  113.79   11.50
  -6   8   7  154.18   35.70
  -6  -8   7  105.09    9.70
   6  -8  -7  145.09   44.90
   6  -8  -7  117.49   12.00
  -6  -8   7   66.89   57.69
  -6  -8   7  129.89   11.10
  -8   8   9  130.49   15.10
  -8   8   9  120.89   10.10
   8   8  -9  126.19   13.00
  -8   8   9  211.78   47.80
   8  -8  -9  224.98   65.79
  -8  -8   9  117.19   12.70
  -8  -8   9  105.69   64.89
   8  -8  -9  144.39   13.90
  -8  -8   9  122.59   10.40
 -10   8  11   31.50    3.10
 -10   8  11   33.50    3.30
  10   8 -11   34.40    7.40
 -10   8  11   52.29   61.39
 -10  -8  11   30.10    7.60
 -10  -8  11   22.80    4.00
  10  -8 -11   77.59   82.69
 -12   8  13  321.67   24.90
 -12   8  13  304.77   24.80
 -12  -8  13  315.97   25.20
 -14   8  15   49.30    5.50
 -14   8  15   50.99    5.10
 -14  -8  15   50.59    6.50
 -16   8  17    0.10    3.30
 -16  -8  17    0.20    3.80
 -18   8  19   76.49    9.40
 -18  -8  19   70.29    9.60
 -19   9  18    4.30    4.10
 -19  -9  18    8.20    4.90
 -17   9  16   47.40    6.20
 -17  -9  16   56.89    7.30
 -15   9  14   26.60    4.20
 -15   9  14   29.20    3.60
 -15  -9  14   25.90    4.40
 -13   9  12    3.00    1.90
  13   9 -12    6.50    8.50
 -13   9  12    2.40    1.50
 -13  -9  12   -1.20    2.70
 -13  -9  12    0.90    7.80
 -11   9  10  560.14   91.99
 -11   9  10  540.25   43.50
 -11   9  10  542.25   43.50
  11   9 -10  614.74   45.20
 -11  -9  10  558.94   44.70
  11  -9 -10  824.32  132.39
 -11  -9  10  507.05   43.80
  -9   9   8    1.00    1.00
  -9   9   8  -21.30   41.50
  -9   9   8    3.40    1.30
  -9  -9   8    1.60    3.40
   9  -9  -8  -63.69   55.59
  -9  -9   8    1.30    1.80
   9  -9  -8    4.30    5.90
  -9  -9   8   -1.10   39.60
   7   9  -6   36.50   15.20
   7   9  -6   52.49   13.70
  -7   9   6   40.40    3.70
  -7   9   6   56.09    8.60
  -7   9   6   37.10   32.80
  -7  -9   6   47.30    4.60
  -7  -9   6   39.70    4.30
   7  -9  -6   76.79   44.10
  -7  -9   6   33.20    4.20
   7  -9  -6   44.00    8.00
  -5   9   4   52.09   25.30
   5   9  -4   60.79    4.80
  -5   9   4   57.19    7.50
  -5   9   4   54.49    4.80
   5  -9  -4   42.00   30.10
   5  -9  -4   50.89    7.20
  -5  -9   4   58.69    5.00
   3   9  -2    6.70    1.10
  -3   9   2   15.70   19.50
  -3   9   2    8.40    3.10
  -3   9   2   11.00    1.50
  -3  -9   2   10.80    1.50
   3  -9  -2    5.70    2.90
   3  -9  -2   -0.10   24.70
   1   9   0  680.13   51.29
   1   9   0  524.55   46.30
  -1   9   0  559.84   46.30
   1   9   0  658.63   49.60
  -1   9   0  628.64   53.99
   1  -9   0  568.34   46.70
  -1  -9   0  582.24   46.50
  -1  -9   0  588.84   46.40
  -1   9   2   28.30    2.50
  -1   9   2   27.50   17.50
   1   9  -2   42.30   15.50
   1   9  -2   18.20   19.70
   1   9  -2   25.00    2.50
  -1   9   2   28.70    4.40
   1  -9  -2   23.50    4.20
  -1  -9   2   26.00    3.90
  -1  -9   2   24.90    2.80
  -1  -9   2   23.80    4.30
   1  -9  -2   27.40   20.20
   3   9  -4   86.19   20.60
   3   9  -4  107.19   24.50
  -3   9   4   93.09    8.70
   3   9  -4   83.19    6.80
  -3   9   4  100.89   25.60
  -3   9   4   83.19    6.80
  -3  -9   4   80.99    7.00
   3  -9  -4   74.19   30.20
  -3  -9   4   82.89    7.90
   3  -9  -4   80.39    8.50
  -3  -9   4   78.99    7.80
  -5   9   6  490.95   35.80
  -5   9   6  376.16   58.49
   5   9  -6  473.15   51.79
   5   9  -6  453.55   54.89
   5   9  -6  458.95   35.80
  -5   9   6  471.85   35.80
   5  -9  -6  461.65   37.00
  -5  -9   6  432.26   37.30
  -5  -9   6  439.86   36.70
  -5  -9   6  449.26   35.90
  -7   9   8    2.20    1.20
  -7   9   8    4.00    1.10
  -7   9   8    3.80   49.70
  -7  -9   8    3.30    1.80
   7  -9  -8    2.60    6.80
   7  -9  -8   11.70   56.39
  -7  -9   8   -4.60    6.00
  -9   9  10   64.59    5.70
  -9   9  10  -11.80   55.89
   9   9 -10   77.99   12.10
  -9   9  10   66.59    5.60
  -9  -9  10   65.19    6.30
 -11   9  12   53.79    5.10
  11   9 -12   84.79   16.40
 -11   9  12   62.09    5.30
 -11  -9  12   88.19   15.80
 -11  -9  12   46.00    6.00
 -13   9  14    9.70    2.30
 -13   9  14    4.10    2.00
 -13  -9  14    9.00    3.30
 -15   9  16   65.69    6.70
 -15   9  16   59.39    6.00
 -15  -9  16   57.69    7.80
 -17   9  18   30.90    4.10
 -17   9  18   21.30    4.70
 -17  -9  18   20.70    5.30
 -18  10  17    9.10    3.90
 -18  10  17    8.80    3.20
 -18 -10  17    7.70    5.10
 -16  10  15   17.60    3.40
 -16  10  15   19.00    2.90
 -16 -10  15   15.00    4.40
 -14  10  13   13.70    2.30
 -14  10  13   14.80    2.70
 -14 -10  13   10.70    3.60
 -12  10  11    5.60    1.60
  12  10 -11    8.20    9.00
 -12  10  11    6.40    1.90
 -12 -10  11    4.00    3.00
 -12 -10  11    4.10    6.90
 -10  10   9   15.00   57.89
 -10  10   9    5.90    1.50
  10  10  -9  -11.60   40.80
 -10  10   9   10.60    1.90
  10 -10  -9   77.59   80.69
 -10 -10   9   11.10    2.60
 -10 -10   9   12.00    4.20
   8  10  -7  106.79   18.30
  -8  10   7   85.79    7.40
  -8  10   7   91.29    7.60
   8 -10  -7  125.49   60.39
  -8 -10   7   95.39    7.90
   6  10  -5   92.89    8.80
  -6  10   5  120.59   36.80
  -6  10   5  109.99   11.70
  -6  10   5  111.99    8.40
   6 -10  -5   96.89   11.20
   6 -10  -5   98.49   43.80
  -4  10   3   17.90    4.40
  -4  10   3   12.20    1.60
  -4  10   3   17.00   25.60
   4 -10  -3   10.20    3.80
   4 -10  -3    3.40   33.70
  -4 -10   3   15.60    2.30
  -2  10   1    5.90    3.50
  -2  10   1    1.40    1.00
  -2  10   1   -5.90   29.40
   2  10  -1    0.00    0.90
   2 -10  -1  -10.20   28.50
   2 -10  -1    3.50    3.60
  -2 -10   1    1.40    1.30
   0  10   1   52.89    5.60
   0  10  -1   50.19    4.00
   0  10  -1   70.79   25.00
   0  10  -1   39.20   17.40
   0  10   1   54.79   16.90
   0  10   1   42.70    4.00
   0 -10   1   49.90    7.20
   0 -10  -1   42.10    5.00
   0 -10   1   43.80    5.30
   0 -10  -1   55.49   22.20
   2  10  -3  118.99    9.70
   2  10  -3  150.08   26.10
  -2  10   3  126.89    9.70
  -2  10   3  133.29   11.30
  -2 -10   3  122.19   10.30
  -2 -10   3  111.19   10.50
   2 -10  -3  141.99   31.70
  -2 -10   3  121.09    9.90
   2 -10  -3  111.49   10.90
  -4  10   5   21.00    2.30
  -4  10   5   34.80   30.70
   4  10  -5   22.80    2.50
  -4  10   5   27.40    5.30
   4  10  -5   33.20   21.50
  -4  10   5   25.60    2.50
   4  10  -5   25.70   20.20
  -4 -10   5   21.90    3.20
   4 -10  -5   37.60   39.70
   4 -10  -5   23.10    4.80
  -4 -10   5   18.80    3.60
  -4 -10   5   27.50    4.60
   6  10  -7   26.30   31.30
  -6  10   7    2.60    1.20
  -6  10   7    4.60    1.20
  -6  10   7  -10.10   40.60
  -6 -10   7   -0.60    3.80
   6 -10  -7   18.30   57.69
  -6 -10   7   -0.80    1.70
   8  10  -9   36.60   50.89
  -8  10   9  -26.90   53.19
   8 -10  -9  -33.40   76.09
  -8 -10   9   11.70    5.40
 -10  10  11    7.90    1.60
 -10  10  11    7.60    1.80
 -10 -10  11    4.00    2.70
 -10 -10  11    3.10    7.20
 -12  10  13   37.40    4.20
 -12  10  13   24.80    3.70
 -12 -10  13   34.50    5.20
 -14  10  15    2.90    2.30
 -14  10  15    5.00    2.90
 -14 -10  15    5.30    3.80
 -16  10  17    4.40    4.30
 -16  10  17    2.50    3.00
 -16 -10  17    0.20    4.60
 -17  11  16    4.90    2.90
 -17  11  16    2.50    3.60
 -17 -11  16    5.50    4.90
 -15  11  14   28.80    4.00
 -15  11  14   36.50    5.00
 -15 -11  14   23.50    4.80
 -13  11  12   29.40    3.80
 -13  11  12   36.80    4.40
 -13 -11  12   42.80    6.10
 -11  11  10  474.75   39.60
 -11  11  10  560.24   39.70
 -11 -11  10  475.55   40.00
  -9  11   8  -30.10   58.89
  -9  11   8    4.30    1.40
  -9  11   8    3.20    1.60
  -9 -11   8    2.60    2.40
   9 -11  -8   30.90   79.19
  -7  11   6  -16.70   44.80
  -7  11   6    5.10    1.50
  -7 -11   6    7.90    2.10
   7 -11  -6   10.40   56.09
  -5  11   4  205.98   40.10
  -5  11   4  161.48   13.00
   5  11  -4  165.58   12.90
   5 -11  -4  168.98   49.60
  -5 -11   4  155.68   13.20
  -3  11   2  104.29    8.40
   3  11  -2  109.69    8.40
   3 -11  -2   99.39   10.20
  -3 -11   2  101.09    8.60
   3 -11  -2   88.39   41.90
  -1  11   0  905.01   80.29
   1  11   0  797.62   62.89
  -1  11   0  768.02   62.89
  -1  11   0  773.82   71.99
   1 -11   0  872.01   63.69
   1 -11   0  755.02   63.29
   1  11  -2    0.80    1.10
   1  11  -2    3.80   21.70
  -1  11   2    3.60    1.10
  -1  11   2   -3.10   22.70
  -1  11   2    2.90    3.70
   1  11  -2   -0.50   16.70
   1 -11  -2    4.40   30.30
  -1 -11   2    1.50    2.30
   1 -11  -2    0.10    3.00
  -1 -11   2    0.90    2.70
   3  11  -4   34.90    3.30
  -3  11   4   34.60    3.40
  -3  11   4   37.90    3.30
   3  11  -4   27.50   18.60
   3  11  -4   31.80   16.10
  -3 -11   4   35.50    4.00
  -3 -11   4   33.80    4.40
   3 -11  -4   51.79   38.30
  -3 -11   4   32.60    4.40
  -5  11   6  420.06   32.20
   5  11  -6  406.36   32.30
  -5  11   6  397.76   32.20
   5  11  -6  435.06   46.30
  -5  11   6  437.36   70.39
   5 -11  -6  502.25   86.79
  -5 -11   6  385.86   32.50
  -5 -11   6  422.36   32.60
   7  11  -8   88.89    7.10
  -7  11   8   64.09   57.39
  -7  11   8   85.19    7.10
  -7  11   8   87.79    7.10
   7 -11  -8  166.98   80.49
  -7 -11   8   78.89    7.70
  -7 -11   8   77.89    9.50
   9  11 -10  131.09   10.90
   9  11 -10   91.09   73.79
  -9  11  10  130.29   10.80
  -9  11  10  134.89   10.90
  -9 -11  10  137.99   11.60
 -11 -11  12   16.00    3.60
 -13  11  14    2.10    2.70
 -13  11  14    1.70    2.20
 -13 -11  14    0.50    3.70
 -15  11  16  205.38   16.50
 -15  11  16  206.78   17.60
 -15 -11  16  189.08   17.90
 -17  11  18   20.40    4.30
 -18  12  17   51.79    6.80
 -16  12  15    2.90    3.50
 -16  12  15    1.70    2.80
 -16 -12  15   -0.90    5.10
 -14  12  13  143.59   11.10
 -14  12  13  112.59   10.30
 -14 -12  13  115.39   12.00
 -12  12  11    1.80    2.20
 -12  12  11    4.60    1.90
 -12 -12  11    7.10    3.70
  10  12  -9   35.90    3.80
 -10  12   9   28.90    3.80
 -10  12   9   27.80    3.40
 -10 -12   9   29.10    4.30
  -8  12   7  488.75   37.00
  -8  12   7  465.05   36.90
   8  12  -7  482.25   37.00
   8 -12  -7  299.67  138.89
  -8 -12   7  449.06   37.20
   6 -12  -5  -14.60   60.79
  -4  12   3    1.30   35.60
   4  12  -3   14.00    2.10
  -4  12   3   13.20    1.80
  -4 -12   3    9.50    2.30
   4 -12  -3   -0.50   52.29
  -2  12   1   -7.60   27.10
   2  12  -1    0.70    1.20
  -2  12   1   -0.10    1.20
   0  12  -1    5.90   20.10
   0  12   1    2.90   25.70
   0  12  -1    5.40    1.40
   0 -12   1    5.20    3.50
   2  12  -3  912.21   71.39
  -2  12   3  998.80   88.79
  -2  12   3  874.21   71.39
   2 -12  -3 1038.50   97.19
  -2 -12   3  864.11   71.59
  -4  12   5   17.80    2.40
  -4  12   5   73.59   45.40
  -4  12   5   15.80    2.30
   4  12  -5   19.50    2.50
   4 -12  -5  -28.30   50.89
  -4 -12   5   14.70    2.70
   6  12  -7    9.50    1.90
  -6  12   7   12.80    2.00
  -6  12   7   14.20    1.90
   6 -12  -7   79.59   75.99
  -6 -12   7   12.00    2.80
  -8  12   9  100.59    8.50
  -8  12   9  107.49    8.60
   8  12  -9  100.09    8.60
  -8 -12   9  100.99    9.40
 -10  12  11    8.00    2.30
 -10  12  11    7.40    2.00
  10  12 -11    4.20    2.10
 -10 -12  11    8.80    3.50
 -12  12  13  140.89   12.10
 -12  12  13  145.49   12.30
  12  12 -13  152.38   12.20
 -14  12  15    7.30    2.90
  14  12 -15   11.50    2.90
 -14 -12  15    5.00    4.60
 -16  12  17   -0.50    3.50
 -17  13  16    7.80    3.60
  15  13 -14   34.00    5.20
 -15  13  14   34.10    4.90
 -15  13  14   35.40    4.70
 -15 -13  14   29.60    6.10
  13  13 -12   21.40    3.30
 -13  13  12   19.10    2.90
 -13  13  12   23.00    3.50
 -13 -13  12   15.20    5.00
 -11  13  10   98.39    8.30
 -11  13  10   89.59    8.60
  11  13 -10  109.09    8.60
 -11 -13  10   90.29    9.70
  -9  13   8   26.00    3.80
  -9  13   8   28.30    3.50
  -7  13   6   40.00    3.90
  -7  13   6   33.80    3.60
   7  13  -6   30.00    3.70
  -7 -13   6   31.60    5.10
  -5  13   4   30.90   48.20
  -5  13   4   23.00    3.00
   5  13  -4   22.00    3.00
  -5 -13   4   26.80    4.10
   5 -13  -4   52.89   70.39
  -3  13   2  269.67   21.40
   3  13  -2  265.97   21.40
  -3  13   2  312.17   45.80
   1  13   0   94.09    8.00
  -1  13   0   99.59    8.00
  -1  13   0   82.79   28.40
   1 -13   0   97.59   10.30
  -1  13   2    7.70    1.70
  -1  13   2  -11.50   28.40
   1 -13  -2    4.30    4.30
  -3  13   4   14.30    1.90
  -3  13   4   13.50    1.80
   3  13  -4    7.60    1.80
  -3  13   4   58.79   44.40
   3 -13  -4   42.40   56.59
  -3 -13   4   11.20    2.60
  -5  13   6   47.90    4.60
   5  13  -6   44.40    4.50
  -5  13   6   49.10    4.50
  -5 -13   6   43.60    5.60
   5 -13  -6   40.10   98.29
  -7  13   8  150.38   10.90
  -7  13   8  124.99   10.80
   7  13  -8  135.89   10.90
  -7 -13   8  113.79   11.50
  -9  13  10   21.50    3.00
   9  13 -10   25.60    3.60
  -9  13  10   17.70    2.60
  -9 -13  10   20.90    4.30
 -11  13  12    5.60    2.30
  11  13 -12    6.30    2.50
 -11  13  12    3.50    2.70
 -11 -13  12    4.80    4.30
 -13  13  14   35.90    5.10
  13  13 -14   34.80    5.30
 -13 -13  14   37.30    6.00
 -15  13  16   20.80    4.00
 -14  14  13   29.10    4.50
  14  14 -13   24.20    4.10
 -14  14  13   29.40    4.70
 -14 -14  13   31.00    6.40
 -12  14  11    0.40    2.90
  12  14 -11    0.70    2.60
 -12  14  11    2.90    2.30
 -12 -14  11   -2.40    4.60
 -10  14   9   14.40    3.00
 -10  14   9   12.30    2.50
  10  14  -9   15.40    2.60
 -10 -14   9   18.70    4.30
  -8  14   7    7.00    2.50
  -8  14   7   11.90    2.20
   8  14  -7   11.60    2.20
  -8 -14   7   17.80    3.70
  -6  14   5  580.24   43.40
   6  14  -5  533.35   43.30
  -6 -14   5  540.75   43.70
   4  14  -3   64.39    5.60
  -4  14   3  107.09   50.89
  -4  14   3   59.89    5.70
  -2  14   1  246.48   20.10
   2  14  -1  259.37   20.10
   0  14   1  283.27   22.90
   0  14  -1  296.77   23.00
  -2  14   3   40.50    4.00
  -2  14   3   41.70    4.20
   2  14  -3   39.60    4.10
  -4  14   5  118.19   10.00
   4  14  -5  127.89   10.00
  -4  14   5  125.29   10.10
  -4 -14   5  113.79   10.70
   6  14  -7  120.59    9.80
  -6  14   7  115.29    9.70
  -6  14   7  124.69    9.80
  -6 -14   7   99.09   10.70
  -8  14   9   -0.30    2.40
  -8  14   9    1.70    1.90
   8  14  -9    0.60    2.10
  -8 -14   9    7.30    4.00
  10  14 -11  475.15   35.70
 -10  14  11  453.65   35.60
 -10  14  11  465.85   35.60
 -10 -14  11  404.06   36.20
  12  14 -13   14.00    3.10
 -12  14  13   17.20    3.70
 -12 -14  13   12.40    5.30
 -13  15  12   21.00    4.10
  13  15 -12   13.50    3.40
 -13  15  12   11.40    3.10
 -13 -15  12   13.10    6.10
 -11  15  10    5.10    2.60
 -11  15  10    7.90    3.20
  11  15 -10    3.40    2.70
 -11 -15  10    9.70    5.30
  -9  15   8   53.69    5.50
   9  15  -8   49.40    5.80
  -9  15   8   63.79    6.10
  -9 -15   8   53.09    8.00
  -7  15   6   42.90    4.70
   7  15  -6   44.50    4.90
  -7  15   6   42.60    6.90
  -7 -15   6   49.60    6.70
  -5  15   4   58.79    5.70
   5  15  -4   58.79    5.60
  -3  15   2  624.84   49.20
   3  15  -2  629.04   49.20
   1  15   0   11.90    2.10
   1  15   0   11.50    2.20
  -1  15   0   11.40    2.20
  -1  15   2   56.09    5.10
  -1  15   2   52.09    5.20
  -3  15   4   -2.30    1.70
  -3  15   4    5.50    2.10
   3  15  -4    1.70    1.80
  -5  15   6    1.10    1.80
   5  15  -6   -0.40    1.90
  -5  15   6    2.10    2.30
  -7  15   8  236.58   20.10
  -7  15   8  272.37   20.20
   7  15  -8  248.68   20.20
  -7 -15   8  245.88   20.90
  -9  15  10  131.19   11.90
   9  15 -10  144.49   12.00
  -9  15  10  146.49   12.10
  -9 -15  10  151.68   13.60
 -11  15  12   86.19    7.50
  11  15 -12   65.59    7.40
 -11 -15  12   76.69   10.70
 -12  16  11   35.90    5.00
  10  16  -9  159.18   14.10
 -10  16   9  144.89   12.80
 -10  16   9  160.98   13.20
  10  16  -9  153.08   14.20
 -10 -16   9  142.49   15.60
   8  16  -7    1.60    2.50
  -8  16   7    3.20    2.40
  -8  16   7    1.30    2.90
   8  16  -7    2.80    2.60
  -8 -16   7    1.90    4.60
  -6  16   5   70.89    6.80
   6  16  -5   64.59    6.40
  -6  16   5   66.99    6.40
  -4  16   3   85.09    7.40
  -4  16   3   84.89    7.60
   4  16  -3   83.89    7.50
   4  16  -3   84.59    7.50
  -2  16   1  433.66   33.50
   2  16  -1  425.66   33.40
   2  16  -1  411.16   33.40
   0  16   1   53.09    5.30
   0  16   1   46.70    4.90
   0  16  -1   48.50    5.10
   2  16  -3   23.30    2.90
  -2  16   3   18.10    2.80
   4  16  -5    7.10    2.40
  -4  16   5    6.30    2.30
  -4  16   5   15.80    4.90
  -6  16   7   73.69    7.30
   6  16  -7   71.09    6.80
  -6  16   7   69.69    6.70
   8  16  -9   14.40    3.30
  -8  16   9   18.80    3.70
  -8  16   9   12.30    2.90
  -8 -16   9   17.80    5.60
   9  17  -8   31.80    4.00
  -9  17   8   32.30    4.50
   9  17  -8   27.70    4.00
  -9  17   8   20.30    3.80
   7  17  -6  152.08   12.20
   7  17  -6  131.09   12.40
  -7  17   6  153.68   12.20
  -7  17   6  142.59   12.60
   5  17  -4    0.60    2.50
  -5  17   4    4.60    2.90
  -5  17   4    2.60    2.90
   5  17  -4    4.00    2.50
   3  17  -2   15.70    2.80
   3  17  -2   12.60    3.00
  -3  17   2   12.40    3.00
  -3  17   2   17.30    2.80
  -1  17   0   64.09    6.60
   1  17   0   69.09    6.40
   1  17   0   70.69    6.70
   1  17  -2  182.58   15.00
  -1  17   2  182.68   15.00
  -3  17   4  134.89   11.10
  -3  17   4  128.29   10.90
   3  17  -4  122.59   10.90
  -5  17   6  147.59   11.90
  -5  17   6  126.59   11.50
   7  17  -8   34.90    5.70
  -7  17   8   43.10    5.40
   8  18  -7   18.20    3.80
  -8  18   7   18.20    4.50
   6  18  -5   86.19    8.00
   6  18  -5   75.49    7.90
  -4  18   3    0.90    3.20
   4  18  -3    7.20    3.70
  -4  18   3    5.30    2.70
   2  18  -1    6.60    3.10
   2  18  -1   12.30    2.80
  -2  18   1   11.40    3.20
  -2  18   1   14.00    3.00
   0  18  -1   60.09    7.10
   0  18   1   54.19    6.10
   0  18  -1   58.19    6.00
   0  18   1   58.69    6.50
   2  18  -3   87.79    8.60
  -2  18   3   92.39    8.50
  -2  18   3   99.29    8.90
  -4  18   5  121.69   11.10
  -5  19   4   31.10    5.80
  -3  19   2   -1.20    3.60
   3  19  -2    0.90    3.70
   1  19   0    1.40    3.50
  -1  19   0    1.80    3.60
  -1  19   2   41.60    6.40
 -22   0  20  166.08   14.80
 -20   0  18   53.29    6.30
 -18   0  16   35.80    4.90
  16   0 -14  218.78   84.79
 -16   0  14  204.08   21.50
 -16   0  14  159.58   14.50
  16   0 -14  194.08   20.10
 -16   0  14  184.98   76.49
  14   0 -12    3.70    6.60
 -14   0  12    3.80    7.00
  14   0 -12   33.20   53.69
 -14   0  12   -1.20   46.50
 -14   0  12    3.10    1.50
  12   0 -10 2281.07  179.38
 -12   0  10 2173.08  165.28
  12   0 -10 1900.81  165.08
 -12   0  10 2270.97  163.98
 -12   0  10 2122.09  178.28
 -12   0  10 1913.51  164.08
 -10   0   8  136.99   12.30
  10   0  -8  133.19   12.30
 -10   0   8   81.39   27.10
 -10   0   8  117.89   10.70
 -10   0   8  147.49   10.50
  10   0  -8  220.28   39.00
  -8   0   6 1187.98  105.79
  -8   0   6 1273.57   99.69
  -8   0   6 1365.86   99.59
   8   0  -6 1362.46  106.79
   8   0  -6 1244.78  100.19
  -8   0   6 1219.78  100.19
   6   0  -4 8800.12  626.24
  -6   0   4 7877.01  625.74
  -6   0   4 7279.07  622.54
  -4   0   2 3562.24  248.98
   4   0  -2 2942.91  248.98
   4   0  -2 3294.37  251.37
  -4   0   2 2946.61  250.97
   2   0   0  785.22   63.29
  -2   0   0  780.02   63.29
  -2   0   0  782.92   64.99
  -2   0   0  826.82   63.09
  -2   0   0  896.71   63.09
   2   0   0  705.33   66.69
   2   0   0  861.31   63.09
   2   0   0  795.02   63.09
   0   0   2  365.26   34.70
   0   0  -2  436.36   31.00
   0   0   2  361.66   31.30
   0   0   2  378.26   31.00
   0   0   2  420.66   31.00
   0   0  -2  415.36   31.00
   0   0  -2  376.56   31.30
   0   0  -2  402.16   34.90
  -2   0   4   51.99    5.30
  -2   0   4   55.49   16.20
   2   0  -4   56.79   13.80
   2   0  -4   57.69    4.50
  -2   0   4   63.39    4.60
   2   0  -4   52.99    5.20
  -2   0   4   55.59    4.50
  -4   0   6 7569.64  576.14
   4   0  -6 6295.17  581.14
   4   0  -6 7857.41  576.84
  -4   0   6 7774.22  576.14
  -6   0   8  263.77   44.00
   6   0  -8  288.17   26.10
  -6   0   8  317.17   25.10
   6   0  -8  350.86   47.40
  -6   0   8  319.07   26.40
  -6   0   8  359.16   25.10
  -8   0  10  365.26   28.40
  -8   0  10  388.76   28.40
  -8   0  10  353.36   30.20
   8   0 -10  310.67   57.99
   8   0 -10  332.87   29.90
  -8   0  10  437.26   60.29
 -10   0  12  793.62  108.99
  10   0 -12  836.42   75.39
 -10   0  12  964.20   73.69
  10   0 -12 1141.59  114.59
 -10   0  12  923.81   73.69
 -10   0  12 1038.70   75.89
 -12   0  14  282.67   21.50
 -12   0  14  282.17   80.19
  12   0 -14  188.48  121.29
 -12   0  14  258.77   21.30
  12   0 -14  271.17   26.60
 -14   0  16  348.37   29.20
 -14   0  16  388.56   29.10
 -16   0  18   46.90    6.00
 -18   0  20   16.30    4.10
 -20   0  22  180.98   16.50
 -23   1  21    2.10    4.70
 -23  -1  21    2.40    4.60
 -21   1  19   45.10    6.30
 -21  -1  19   37.10    5.20
 -19   1  17  198.18   16.40
 -19  -1  17  194.98   17.00
  17   1 -15   72.49   13.70
 -17   1  15  146.19   91.79
 -17   1  15  130.79   26.20
 -17   1  15   69.39    7.20
 -17  -1  15   97.19   19.30
 -17  -1  15   86.69    7.20
  17  -1 -15   66.39   15.40
 -15   1  13    8.20    1.30
 -15   1  13    7.00    8.60
 -15   1  13    5.70    1.80
  15   1 -13    5.80    7.10
 -15   1  13  -13.50   58.99
  15   1 -13  -15.60   64.09
 -15  -1  13    6.90    1.90
 -15  -1  13   51.29   60.29
  15  -1 -13    3.40    7.80
 -15  -1  13   10.60    8.10
  15  -1 -13   38.60   68.29
 -13   1  11  -37.00   40.30
 -13   1  11   -0.10    1.20
  13   1 -11   -6.60   42.70
 -13   1  11    1.70    0.80
 -13   1  11   -0.20    6.40
  13   1 -11    1.30    6.60
 -13  -1  11   11.50   40.20
  13  -1 -11    8.20   47.00
  13  -1 -11    1.80    5.60
 -13  -1  11    0.70    1.40
 -13  -1  11   -3.90    5.40
  11   1  -9    1.50    3.70
 -11   1   9    0.40    4.20
 -11   1   9  -13.30   26.20
 -11   1   9    2.90    1.00
  11   1  -9   19.20   28.40
  11  -1  -9  -10.20   30.60
 -11  -1   9    5.50    4.00
  11  -1  -9    6.00    4.40
 -11  -1   9    0.80    1.00
 -11  -1   9   15.40   27.90
  -9   1   7 2192.08  168.68
  -9   1   7 2225.98  168.58
  -9   1   7 1982.40  175.68
  -9   1   7 2254.77  169.48
   9   1  -7 2085.79  169.28
   9   1  -7 2469.55  176.78
   9  -1  -7 2157.88  169.38
  -9  -1   7 2075.39  169.28
  -9  -1   7 2118.49  168.68
  -9  -1   7 2056.39  175.28
   7   1  -5  139.39   11.40
  -7   1   5  116.39   22.50
  -7   1   5  139.29   10.70
   7   1  -5  121.99   21.60
  -7   1   5  137.99   11.50
   7  -1  -5  135.39   11.60
   7  -1  -5  149.19   23.80
  -7  -1   5  115.49   20.10
  -7  -1   5  138.09   10.70
  -7  -1   5  130.89   11.40
   5   1  -3  966.80   75.49
  -5   1   3  884.41   72.59
  -5   1   3  997.80   72.49
   5   1  -3  949.11   72.89
  -5   1   3  861.51   75.99
  -5   1   3  885.31   72.89
   5  -1  -3  822.12   72.89
  -5  -1   3  977.90   72.59
  -5  -1   3  890.41   75.19
   5  -1  -3 1059.49   78.79
  -3   1   1  158.48   12.80
  -3   1   1  121.99   15.90
  -3   1   1  167.28   12.80
   3   1  -1  171.08   12.70
   3  -1  -1  155.98   16.30
  -3  -1   1  176.38   12.70
  -3  -1   1  133.39   14.70
  -3  -1   1  139.19   12.90
  -3  -1   1  181.28   12.80
   3  -1  -1  155.18   13.00
   3  -1  -1  178.78   12.80
   1   1   1   80.79   11.90
  -1   1  -1  100.59    8.20
  -1   1  -1   88.49   12.50
   1   1   1   98.99    8.10
  -1   1  -1  110.69    8.00
   1   1   1  103.69    7.90
  -1   1  -1   95.59    7.90
  -1  -1  -1  100.19    8.20
   1  -1   1  110.69    7.90
   1  -1   1  103.09    8.30
   1  -1   1   95.49   12.60
   1  -1   1   94.99    7.90
   1   1  -3 2180.78  162.68
  -1   1   3 2076.39  166.08
   1   1  -3 1901.51  162.98
  -1   1   3 2443.96  162.68
   1   1  -3 2029.50  162.68
  -1   1   3 1921.71  163.08
   1   1  -3 2154.98  166.48
  -1  -1   3 2123.39  162.68
  -1  -1   3 1997.50  163.08
   1  -1  -3 2104.09  163.28
   1  -1  -3 1946.01  166.08
   1  -1  -3 1978.90  162.78
   1  -1  -3 2288.57  162.68
  -1  -1   3 2037.40  166.78
   3   1  -5  166.88   14.60
   3   1  -5  198.88   26.80
  -3   1   5  202.48   14.00
  -3   1   5  161.48   14.70
  -3   1   5  180.88   14.00
  -3   1   5  150.28   24.60
  -3  -1   5  173.08   14.70
   3  -1  -5  154.78   14.60
  -3  -1   5  182.08   14.00
  -3  -1   5  197.58   27.00
   3  -1  -5  176.08   26.50
  -3  -1   5  186.78   14.00
  -5   1   7   21.80   20.50
  -5   1   7   19.30    3.90
   5   1  -7   33.20   22.20
  -5   1   7   25.40    2.00
  -5   1   7   24.40    2.00
   5  -1  -7   21.70   22.80
  -5  -1   7   21.10    4.30
   5  -1  -7   27.60    4.30
  -5  -1   7   23.40   21.40
  -5  -1   7   17.60    2.10
  -5  -1   7   19.90    2.10
   7   1  -9 1303.07  151.68
  -7   1   9 1370.86  127.59
   7   1  -9 1360.96  115.19
  -7   1   9 1610.24  114.29
  -7   1   9 1536.85  115.49
  -7   1   9 1550.54  114.29
  -7  -1   9 1589.64  114.29
  -7  -1   9 1253.37  114.39
  -7  -1   9 1504.05  115.39
   7  -1  -9 1695.33  130.39
  -7  -1   9 1333.17  128.09
   7  -1  -9 1370.66  115.19
  -9   1  11   17.90    2.10
  -9   1  11   13.70    6.70
  -9   1  11   17.10    2.20
   9   1 -11   -0.30   42.60
   9   1 -11   13.50    6.00
  -9  -1  11   12.90    2.00
  -9  -1  11    9.60   42.10
  -9  -1  11   13.80    6.30
  -9  -1  11   20.10    2.30
   9  -1 -11   14.00    5.60
   9  -1 -11   88.09   46.80
  11   1 -13   49.80   65.99
 -11   1  13   48.20   16.40
 -11   1  13   25.90    2.80
 -11   1  13   24.60    3.10
  11   1 -13   18.00    8.10
 -11   1  13   82.19   58.99
 -11  -1  13   37.00   62.49
 -11  -1  13   21.60    3.20
  11  -1 -13   17.50   69.49
 -11  -1  13   25.60    2.80
  11  -1 -13   21.90    9.00
 -11  -1  13   22.60    9.30
 -13   1  15    4.80    2.10
 -13   1  15   26.20  100.49
  13   1 -15    1.90   10.70
 -13   1  15    8.20    1.90
 -13   1  15  -13.30   12.50
 -13  -1  15    9.20    1.80
 -13  -1  15   24.50   12.70
  13  -1 -15  -42.00  101.99
 -13  -1  15    8.70    2.20
  13  -1 -15    2.10   11.50
 -15   1  17    0.60    2.20
 -15   1  17    2.00    2.60
 -15  -1  17    0.00    2.60
 -17   1  19  107.79   10.00
 -19   1  21   20.10    4.70
 -19  -1  21   18.80    5.00
 -22   2  20   -2.80    4.00
 -22  -2  20   -0.80    4.10
 -20   2  18   40.40    5.90
 -20  -2  18   42.50    6.10
 -18   2  16    0.90    2.40
 -18  -2  16    0.90    2.50
 -16   2  14  148.79   11.10
 -16   2  14  181.88   21.20
 -16   2  14   49.70   77.59
 -16   2  14  126.69   11.40
  16   2 -14  107.29   21.90
  16  -2 -14  134.29   18.30
 -16  -2  14  177.48   20.30
 -16  -2  14  130.09   11.60
  16  -2 -14  156.68   93.09
 -14   2  12  204.28   58.19
 -14   2  12  245.48   18.00
  14   2 -12  206.88   20.80
 -14   2  12  214.38   18.20
  14   2 -12  374.16   60.69
  14  -2 -12  257.17   21.90
 -14  -2  12  240.98   21.60
 -14  -2  12  209.88   18.40
  14  -2 -12  269.97   65.19
  12   2 -10   18.50    5.00
 -12   2  10   17.50    2.30
 -12   2  10   19.90    1.70
 -12   2  10   22.50    6.20
  12   2 -10   29.70   34.40
 -12   2  10   -0.10   35.20
 -12  -2  10   26.20   34.50
  12  -2 -10   43.90   40.10
 -12  -2  10   14.00    5.10
  12  -2 -10   14.00    5.40
 -12  -2  10   13.20    2.00
  10   2  -8   92.49   25.70
 -10   2   8   92.69    7.50
 -10   2   8   51.09   25.50
  10   2  -8   92.39    9.00
 -10   2   8   90.59    7.30
 -10   2   8  112.59    9.90
  10  -2  -8   94.49    9.80
 -10  -2   8   62.29   25.30
  10  -2  -8  120.49   31.00
 -10  -2   8   87.39    7.60
  -8   2   6    5.30    2.70
  -8   2   6    6.30   17.50
   8   2  -6  -14.80   14.40
   8   2  -6    3.60    2.00
  -8  -2   6   -4.60   14.30
   8  -2  -6    6.90    2.80
   8  -2  -6   -4.20   17.60
  -8  -2   6    4.70    2.10
   6   2  -4  216.18   18.20
  -6   2   4  227.48   18.50
   6   2  -4  222.28   23.20
  -6   2   4  221.58   26.30
  -6  -2   4  255.67   18.00
  -6  -2   4  226.48   18.30
   6  -2  -4  221.88   18.50
  -6  -2   4  213.38   23.30
  -4   2   2 3172.98  265.97
   4   2  -2 3800.92  263.27
   4   2  -2 3554.54  264.67
  -4   2   2 3286.17  263.27
   4   2  -2 3083.59  263.17
   4  -2  -2 3648.54  266.37
  -4  -2   2 3073.49  264.47
  -2   2   0  833.32   65.29
  -2   2   0  804.42   65.29
   2   2   0  866.61   65.39
  -2   2   0  868.81   65.59
  -2   2   0  779.12   67.79
  -2  -2   0  776.22   66.59
   2  -2   0  815.52   65.29
   2  -2   0  742.13   65.69
  -2  -2   0  899.21   65.29
  -2  -2   0  960.20   65.29
   2  -2   0  850.01   65.29
   0   2  -2 2869.11  215.48
   0   2   2 2545.35  215.38
   0   2  -2 2786.72  218.48
   0   2   2 2700.73  217.88
   0   2  -2 2472.55  215.68
   0  -2  -2 3054.09  215.38
   0  -2   2 2904.61  215.48
   0  -2   2 2452.55  218.28
   0  -2   2 3205.08  215.48
   0  -2  -2 2603.64  218.08
  -2   2   4 1031.50   84.79
  -2   2   4 1145.39   84.29
  -2   2   4 1011.70   88.99
  -2   2   4 1164.68   84.29
   2   2  -4  981.20   84.69
   2   2  -4 1128.39   89.89
  -2  -2   4 1086.89   84.39
   2  -2  -4 1137.49   89.79
  -2  -2   4 1051.29   90.09
   2  -2  -4 1051.49   84.29
  -2  -2   4 1096.19   84.39
   2  -2  -4 1032.50   84.79
  -2  -2   4 1123.09   84.79
   4   2  -6  630.14   54.39
  -4   2   6  509.65   44.20
  -4   2   6  534.55   43.40
  -4   2   6  641.84   43.40
   4   2  -6  512.05   44.00
  -4   2   6  568.24   53.39
  -4  -2   6  570.94   43.50
  -4  -2   6  439.66   54.39
  -4  -2   6  570.94   44.20
   4  -2  -6  535.35   44.10
   4  -2  -6  560.24   55.09
  -4  -2   6  574.94   43.50
   6   2  -8   19.90    4.10
  -6   2   8   29.40    6.00
   6   2  -8   23.80   31.10
  -6   2   8   25.70    2.40
  -6   2   8   27.70    2.40
  -6   2   8   70.39   27.40
  -6  -2   8   30.00    2.50
  -6  -2   8   -1.40   26.10
  -6  -2   8   37.90    5.70
  -6  -2   8   30.40    2.60
   6  -2  -8   18.40    4.20
   6  -2  -8    3.80   27.00
   8   2 -10  295.37   48.80
  -8   2  10  303.77   22.50
  -8   2  10  253.97   28.30
  -8   2  10  279.67   22.50
  -8   2  10  274.47   46.70
   8   2 -10  260.07   24.10
   8  -2 -10  274.47   24.30
   8  -2 -10  354.36   63.59
  -8  -2  10  314.87   22.50
  -8  -2  10  277.07   48.80
  -8  -2  10  292.17   22.60
  10   2 -12   54.09   54.19
 -10   2  12    2.20    1.40
  10   2 -12   -4.20    6.00
 -10   2  12   -4.20    7.60
 -10   2  12   21.10   51.59
 -10   2  12    2.60    1.10
  10  -2 -12  -35.90   57.29
  10  -2 -12   -0.20    5.70
 -10  -2  12   53.09   53.39
 -10  -2  12    6.10    7.80
 -10  -2  12    1.00    1.50
  12   2 -14  274.77   28.40
 -12   2  14  310.77   23.90
  12   2 -14  133.19   85.59
 -12   2  14  342.87   30.00
 -12   2  14  251.17   81.99
 -12   2  14  306.67   24.00
 -12  -2  14  268.17   82.79
 -12  -2  14  315.47   23.90
 -12  -2  14  310.97   30.30
  12  -2 -14  283.07   29.10
  12  -2 -14  301.07   91.99
 -12  -2  14  294.57   24.10
 -14   2  16   26.90  116.39
 -14   2  16   16.40    2.60
 -14   2  16    3.40   16.50
 -14   2  16   16.00    2.80
  14  -2 -16  131.49  126.09
 -14  -2  16   14.70    3.10
  14  -2 -16   21.90   15.10
 -14  -2  16   14.50    2.90
 -16   2  18   -0.70    3.00
 -16  -2  18    2.50    3.20
 -18   2  20   11.40    4.00
 -18  -2  20   11.70    4.30
 -20   2  22   11.10    5.10
 -20  -2  22    5.30    6.60
 -23   3  21   12.70    4.80
 -23  -3  21   10.00    5.20
 -21   3  19   23.80    4.50
 -21  -3  19   31.20    4.70
 -19   3  17   99.89    9.70
 -19  -3  17   99.09    9.30
 -17   3  15  178.28   12.50
 -17   3  15   57.49  125.99
 -17   3  15  190.98   26.10
 -17   3  15  138.09   12.80
  17  -3 -15  304.07  117.69
  17  -3 -15  158.68   22.80
 -17  -3  15  139.39   13.00
 -15   3  13   -0.30    9.50
 -15   3  13  -14.60   61.29
 -15   3  13    1.00    1.10
 -15   3  13    2.90    1.70
  15   3 -13   -5.40    6.40
  15  -3 -13   -3.60    8.60
 -15  -3  13    4.80    8.10
  15  -3 -13   68.69   76.59
 -15  -3  13    2.40    1.80
  13   3 -11  783.02   91.49
  13   3 -11  576.24   46.40
 -13   3  11  558.04   45.00
 -13   3  11  556.54   80.59
 -13  -3  11  549.45   45.10
 -13  -3  11  508.15   80.29
  13  -3 -11  753.72   87.89
  13  -3 -11  569.54   48.10
  11   3  -9  255.57   21.30
 -11   3   9  259.47   48.90
 -11   3   9  238.88   20.00
  11   3  -9  333.47   45.80
 -11   3   9  247.98   20.10
 -11   3   9  272.27   22.20
 -11  -3   9  245.88   40.30
  11  -3  -9  266.57   22.10
 -11  -3   9  262.37   21.40
  11  -3  -9  309.27   47.00
 -11  -3   9  234.38   20.20
  -9   3   7  119.99    9.80
  -9   3   7   87.39   25.90
   9   3  -7  167.08   29.20
  -9   3   7  110.59    9.80
   9   3  -7  128.19   10.90
  -9   3   7  126.59   11.50
   9  -3  -7  220.98   39.00
  -9  -3   7  132.39   10.00
   9  -3  -7  131.59   11.60
  -9  -3   7  119.59   10.90
  -9  -3   7  124.69   23.80
  -7   3   5  559.84   54.09
   7   3  -5  539.75   46.30
  -7   3   5  598.24   46.00
  -7   3   5  590.74   46.70
   7   3  -5  561.84   51.09
  -7  -3   5  584.14   46.40
   7  -3  -5  671.73   60.09
  -7  -3   5  594.54   46.10
   7  -3  -5  586.54   46.70
  -7  -3   5  638.64   52.19
  -5   3   3   53.19   13.70
   5   3  -3   56.09   10.40
  -5   3   3   57.49    4.60
   5  -3  -3   61.09    5.50
  -5  -3   3   55.19    4.70
   5  -3  -3   59.09   15.00
  -5  -3   3   64.59   11.00
  -5  -3   3   49.50    4.90
   3   3  -1 1092.79   91.69
  -3   3   1 1115.29   91.69
  -3   3   1 1179.48   94.79
   3   3  -1 1321.47   91.69
  -3   3   1 1120.89   91.99
   3   3  -1 1080.29   91.69
  -3  -3   1 1247.58   91.69
  -3  -3   1 1268.37   92.29
  -3  -3   1 1165.58   92.29
   3  -3  -1 1161.48   92.09
   1   3   1 1820.82  138.99
  -1   3  -1 1920.21  138.99
   1   3   1 1755.02  140.79
   1   3   1 1617.84  139.09
  -1   3  -1 1825.22  142.09
   1  -3   1 1780.12  139.29
  -1  -3  -1 1743.63  139.19
   1  -3   1 1871.11  139.09
  -1  -3  -1 1699.03  140.69
  -1   3   3  874.71   68.59
  -1   3   3  959.40   68.59
   1   3  -3 1014.90   73.99
  -1   3   3  780.52   72.09
  -1   3   3  833.22   68.89
   1   3  -3  814.82   68.89
   1  -3  -3  803.72   68.89
  -1  -3   3  901.41   68.59
   1  -3  -3  942.81   73.09
  -1  -3   3  891.91   68.59
  -1  -3   3  733.43   73.09
   1  -3  -3  941.51   68.59
  -1  -3   3  924.61   68.99
  -3   3   5   47.30    5.20
   3   3  -5   41.70    4.80
  -3   3   5   42.30    3.70
   3   3  -5   38.60   17.30
  -3   3   5   48.40   16.60
   3  -3  -5   43.20    5.00
  -3  -3   5   46.90    3.80
  -3  -3   5   23.50   18.10
  -3  -3   5   49.40    3.80
   3  -3  -5   49.10   17.50
   5   3  -7   61.59    6.40
  -5   3   7   49.50    4.70
   5   3  -7   99.39   42.60
  -5   3   7   53.89    6.80
  -5   3   7   62.99   22.90
  -5   3   7   62.59    4.70
  -5  -3   7   64.59    4.80
  -5  -3   7   56.59    4.70
  -5  -3   7   75.49   26.70
   5  -3  -7   55.39   26.30
   5  -3  -7   56.79    6.70
   7   3  -9  100.19   10.00
   7   3  -9  101.79   34.30
  -7   3   9  125.39   11.60
  -7   3   9   73.69   34.00
   7  -3  -9  100.39   10.30
  -7  -3   9   79.89   35.40
   7  -3  -9  131.19   39.30
  -7  -3   9   94.19    8.10
  -7  -3   9   94.19    8.00
  -7  -3   9  102.69   10.40
  -9   3  11  667.83   51.19
   9   3 -11  580.84   52.59
  -9   3  11  611.14   83.29
   9   3 -11  719.63   87.09
  -9   3  11  674.43   51.19
  -9   3  11  661.53   53.49
  -9  -3  11  712.13   51.19
  -9  -3  11  733.43   53.19
  -9  -3  11  635.34   51.29
  -9  -3  11  554.74   84.89
   9  -3 -11  599.24   52.79
   9  -3 -11  587.94   91.89
 -11   3  13  476.05   36.80
  11   3 -13  454.25   39.50
 -11   3  13  476.75   36.90
  11   3 -13  599.64   99.89
 -11   3  13  382.46   79.89
  11  -3 -13  757.32  115.29
 -11  -3  13  486.85   83.09
  11  -3 -13  415.86   39.50
 -11  -3  13  451.85   37.00
 -11  -3  13  513.35   36.80
 -13   3  15  105.69   17.10
 -13   3  15   70.89    6.30
 -13   3  15   70.39    6.00
 -13   3  15   13.50   89.29
  13  -3 -15   48.30  110.19
 -13  -3  15   94.39   21.00
  13  -3 -15   74.39   15.30
 -13  -3  15   58.79    5.80
 -13  -3  15   66.39    6.50
 -15   3  17  128.09   11.50
 -15   3  17  157.58   11.70
 -15  -3  17  118.59   11.60
 -17   3  19   31.20    4.60
 -17  -3  19   37.70    4.80
 -19   3  21   23.60    5.10
 -19  -3  21   24.90    5.30
 -22   4  20   34.10    5.20
 -22  -4  20   26.20    5.40
 -20   4  18    4.90    3.10
 -20  -4  18    9.80    3.60
 -18   4  16   73.09  126.79
  18  -4 -16   22.20   22.90
  18  -4 -16   61.99  159.68
  16   4 -14  205.18   23.60
 -16   4  14  234.88   82.69
 -16   4  14  216.68   18.40
 -16   4  14  259.47   18.20
 -16   4  14  275.57   28.00
  16  -4 -14  424.96  112.29
  16  -4 -14  204.08   25.10
 -16  -4  14  215.38   18.50
 -14   4  12  166.68   14.70
 -14   4  12  204.58   20.60
  14   4 -12  193.18   17.70
 -14   4  12  165.38   58.19
 -14   4  12  183.48   14.40
 -14  -4  12  188.08   18.10
 -14  -4  12  175.68   14.80
  14  -4 -12  225.08   75.99
 -14  -4  12  141.69   57.79
  14  -4 -12  182.68   19.50
 -12   4  10  218.68   18.70
 -12   4  10  188.08   47.10
  12   4 -10  238.08   40.90
 -12   4  10  179.58   15.20
 -12   4  10  190.08   15.40
 -12  -4  10  200.58   17.30
  12  -4 -10  278.37   55.69
 -12  -4  10  182.08   15.50
  12  -4 -10  197.48   18.10
 -12  -4  10  193.58   43.20
 -10   4   8  499.05   60.69
 -10   4   8  515.55   42.20
  10   4  -8  577.84   55.79
  10   4  -8  524.65   43.00
 -10   4   8  573.14   43.70
 -10  -4   8  521.25   42.30
  10  -4  -8  525.05   43.50
  10  -4  -8  701.03   69.29
 -10  -4   8  528.15   43.00
 -10  -4   8  559.34   57.69
  -8   4   6   20.70    4.00
   8   4  -6   19.80    3.30
   8   4  -6   18.70    1.60
  -8   4   6   20.90   20.70
  -8   4   6   15.40    1.80
   8   4  -6    9.70   13.50
   8  -4  -6   32.10   24.10
  -8  -4   6   15.60    2.10
  -8  -4   6   22.00   15.60
   8  -4  -6   13.20    3.60
  -6   4   4  226.68   18.00
  -6   4   4  232.38   18.80
   6   4  -4  263.97   23.00
  -6   4   4  234.98   29.00
   6   4  -4  216.58   18.30
  -6  -4   4  222.38   18.30
   6  -4  -4  250.67   18.90
  -6  -4   4  222.88   24.30
  -6  -4   4  216.08   18.10
  -4   4   2  245.98   18.70
   4   4  -2  237.08   19.50
  -4   4   2  238.68   26.20
  -4   4   2  243.88   19.20
   4   4  -2  238.88   18.70
  -4  -4   2  219.58   19.80
  -4  -4   2  231.18   18.80
   4  -4  -2  253.87   19.30
  -2   4   0  666.53   52.79
  -2   4   0  716.83   53.09
  -2   4   0  662.83   56.69
   2   4   0  627.64   52.79
   2   4   0  691.33   53.79
  -2  -4   0  729.43   52.79
   2  -4   0  684.43   57.49
   2  -4   0  603.54   53.09
  -2  -4   0  695.03   52.79
   0   4  -2 1274.17  100.29
   0   4  -2 1392.56  104.69
   0   4   2 1216.68  100.29
   0   4   2 1327.87  100.29
   0   4   2 1348.67  103.19
   0   4   2 1244.18  100.49
   0   4  -2 1198.28  103.89
   0  -4  -2 1359.46  103.29
   0  -4  -2 1300.47  100.49
   0  -4   2 1220.28  100.69
   0  -4   2 1390.66  100.69
   0  -4   2 1320.87  100.29
   0  -4  -2 1126.09  100.19
  -2   4   4   98.19    7.30
  -2   4   4   93.19    8.10
   2   4  -4   98.29   18.30
  -2   4   4  110.19   19.90
  -2   4   4   94.89    7.30
   2   4  -4   81.49    8.00
  -2  -4   4   81.09    8.10
  -2  -4   4   93.59    7.30
  -2  -4   4   91.19    7.40
   2  -4  -4   91.09   18.20
  -2  -4   4   92.99   19.70
   2  -4  -4   98.79    8.10
  -4   4   6  305.17   39.50
  -4   4   6  351.16   25.30
  -4   4   6  324.07   25.30
   4   4  -6  313.97   39.30
   4   4  -6  299.87   26.00
  -4   4   6  333.07   26.30
  -4  -4   6  318.47   25.40
   4  -4  -6  329.77   26.20
  -4  -4   6  312.07   25.30
  -4  -4   6  296.27   43.40
   4  -4  -6  324.77   42.70
  -4  -4   6  324.67   26.10
  -6   4   8  -26.00   27.30
   6   4  -8   11.50    3.80
  -6   4   8   11.60    4.40
   6   4  -8   13.60   27.50
  -6  -4   8    5.20    3.50
   6  -4  -8   -0.20   31.50
   6  -4  -8   12.00    3.90
  -6  -4   8    2.20   31.30
  -8   4  10   84.89    7.00
  -8   4  10   85.89   11.60
   8   4 -10   67.89    9.80
   8   4 -10  116.39   40.50
  -8   4  10  131.09   41.90
  -8   4  10   95.39    7.10
  -8  -4  10   99.69   44.50
  -8  -4  10   98.59    7.00
   8  -4 -10  143.89   47.50
  -8  -4  10   76.89    7.20
   8  -4 -10   81.29   10.20
 -10   4  12  180.98   14.50
  10   4 -12  212.88   59.39
 -10   4  12  207.08   19.90
 -10   4  12  195.88   14.60
 -10   4  12  171.18   56.49
  10  -4 -12  174.58   18.50
  10  -4 -12  221.28   69.49
 -10  -4  12  167.48   14.50
 -10  -4  12  158.68   62.99
 -10  -4  12  175.88   14.90
 -10  -4  12  192.78   18.60
 -12   4  14   50.99   18.70
 -12   4  14   43.40    3.80
 -12   4  14   35.70    4.00
 -12   4  14   30.60   76.99
  12   4 -14   36.20   10.00
 -12  -4  14   33.10    3.60
 -12  -4  14   37.40    4.50
  12  -4 -14  -15.50   97.29
 -14   4  16  136.39   12.20
 -14   4  16  167.48   12.10
 -14  -4  16  136.19   12.50
 -16   4  18    1.90    3.10
 -16   4  18    2.90    2.80
 -16  -4  18    0.60    3.30
 -18   4  20    1.60    4.10
 -18  -4  20    5.90    4.40
 -23   5  21   -2.60    5.10
 -21   5  19   51.19    7.00
 -21  -5  19   49.70    7.80
 -19   5  17   31.80    5.20
 -19  -5  17   35.80    4.80
 -17   5  15   15.70   16.00
 -17   5  15   30.30    4.00
 -17   5  15  -18.60  102.29
  17  -5 -15   26.40   14.60
  17  -5 -15   -0.20  140.49
 -17  -5  15   17.60    3.50
 -15   5  13   53.39   12.30
 -15   5  13   42.20    3.60
 -15   5  13   39.30   70.19
 -15   5  13   36.20    4.10
  15   5 -13   25.40    9.20
 -15  -5  13   36.70    4.80
  15  -5 -13   46.10   11.80
  15  -5 -13  113.69   91.39
 -15  -5  13   41.10    9.30
 -13   5  11   45.00   49.20
 -13   5  11   50.39    9.10
 -13   5  11   36.70    3.00
 -13   5  11   33.20    3.40
  13   5 -11   27.90    6.40
  13   5 -11   42.60   42.30
 -13  -5  11   24.80    3.80
  13  -5 -11   35.30    8.70
  13  -5 -11    7.80   64.49
 -13  -5  11   20.60   45.40
  11   5  -9  506.75   38.10
 -11   5   9  508.75   66.29
 -11   5   9  426.66   38.20
  11   5  -9  537.85   58.19
  11   5  -9  491.25   39.20
 -11   5   9  548.45   40.30
 -11   5   9  454.25   38.20
 -11  -5   9  459.15   38.40
  11  -5  -9  518.95   77.99
 -11  -5   9  512.45   39.30
 -11  -5   9  475.75   63.09
  11  -5  -9  494.35   40.10
  -9   5   7  251.67   41.70
  -9   5   7  274.07   21.60
  -9   5   7  232.98   20.00
   9   5  -7  332.17   34.10
   9   5  -7  231.68   20.60
  -9  -5   7  269.97   38.90
   9  -5  -7  264.77   21.50
  -9  -5   7  246.18   20.70
  -9  -5   7  249.38   20.10
   9  -5  -7  350.06   51.29
  -7   5   5   31.50    5.10
   7   5  -5   30.60   11.40
   7   5  -5   21.00    3.30
  -7   5   5   22.70    2.30
  -7   5   5   36.70   19.40
   7  -5  -5   31.80    4.80
  -7  -5   5   25.90    3.30
   7  -5  -5   44.90   23.60
  -7  -5   5   24.40    2.50
  -7  -5   5   29.30   14.90
  -5   5   3  327.57   26.20
   5   5  -3  356.76   26.20
  -5   5   3  340.17   26.80
   5   5  -3  364.76   27.70
  -5   5   3  344.37   35.10
  -5  -5   3  327.87   26.20
  -5  -5   3  318.87   26.20
  -5  -5   3  285.57   28.70
   5  -5  -3  339.17   26.90
  -3   5   1  682.23   58.79
  -3   5   1  654.63   53.79
  -3   5   1  664.53   53.39
   3  -5  -1  667.53   53.89
  -3  -5   1  729.33   53.39
   3  -5  -1  701.83   59.29
  -1   5  -1  721.83   62.09
   1   5   1  754.82   60.09
   1   5   1  657.03   57.59
   1   5   1  743.03   57.79
  -1  -5  -1  708.23   57.69
   1  -5   1  692.73   57.59
  -1  -5  -1  835.42   57.59
  -1  -5  -1  828.32   60.29
   1  -5   1  693.53   57.99
  -1   5   3  419.66   37.90
  -1   5   3  482.35   37.30
   1   5  -3  522.95   48.50
  -1   5   3  483.85   43.30
  -1   5   3  496.75   37.30
   1   5  -3  466.65   44.10
   1  -5  -3  484.45   44.30
   1  -5  -3  476.45   37.70
  -1  -5   3  412.36   37.80
  -1  -5   3  491.65   37.80
  -1  -5   3  527.25   37.30
  -3   5   5  328.27   26.50
  -3   5   5  262.67   37.70
  -3   5   5  313.17   25.60
   3   5  -5  301.77   26.30
   3   5  -5  335.77   39.10
  -3   5   5  331.57   25.70
  -3  -5   5  339.47   25.70
   3  -5  -5  351.96   41.30
  -3  -5   5  355.66   26.40
  -3  -5   5  350.06   25.80
  -3  -5   5  310.87   44.70
   3  -5  -5  315.27   26.40
  -5   5   7   74.09    6.10
  -5   5   7   90.19   26.60
   5   5  -7   76.39   26.20
  -5   5   7   77.59    6.10
   5   5  -7   76.69    8.10
  -5   5   7   75.39    8.60
  -5  -5   7   77.09    8.10
   5  -5  -7   78.29    8.30
  -5  -5   7   70.49    6.30
  -5  -5   7   80.09    6.20
  -5  -5   7  137.29   32.40
   5  -5  -7   31.20   29.30
   7   5  -9  -14.00   31.70
   7   5  -9    8.90    4.30
  -7   5   9   24.90    5.70
  -7   5   9   13.40    1.60
  -7   5   9   -5.80   36.70
  -7   5   9   11.40    1.70
  -7  -5   9   11.80    1.60
   7  -5  -9   12.90    4.80
  -7  -5   9   10.30    4.70
   7  -5  -9   18.90   40.80
  -7  -5   9   19.80   39.80
  -7  -5   9   12.10    1.80
   9   5 -11  154.68   17.00
  -9   5  11  165.88   14.40
  -9   5  11  204.78   19.40
   9   5 -11  121.09   51.29
  -9   5  11  182.88   14.50
  -9   5  11   92.79   51.29
   9  -5 -11  180.58   17.80
  -9  -5  11  199.18   17.90
   9  -5 -11  190.48   66.29
  -9  -5  11  200.48   14.40
  -9  -5  11  147.59   58.19
  -9  -5  11  186.88   15.00
 -11   5  13  139.19   10.90
 -11   5  13  138.09   72.19
 -11   5  13  136.89   10.80
 -11   5  13  147.59   19.20
  11   5 -13  130.69   16.20
  11  -5 -13  144.59   17.00
  11  -5 -13  195.18   95.79
 -11  -5  13  126.89   10.80
 -11  -5  13  129.29   11.20
 -13   5  15  117.09   10.30
 -13   5  15  125.19   10.20
 -13   5  15   68.59  106.29
 -13  -5  15  106.19   10.60
  13  -5 -15  223.08  137.89
 -13  -5  15  142.89   10.30
 -15   5  17   24.40    3.20
 -15   5  17   26.10    3.60
 -15  -5  17   17.70    3.80
 -17   5  19    6.30    3.60
 -17  -5  19    5.00    4.20
 -19  -5  21   57.69    8.10
 -22  -6  20    4.50    5.20
 -20   6  18   48.70    6.50
 -20  -6  18   54.19    7.10
 -18   6  16   91.49    7.60
 -18   6  16   78.89    8.00
 -18  -6  16   89.49    8.80
 -16   6  14  113.69    9.00
 -16   6  14  108.19    9.40
 -16   6  14   59.29   94.19
 -16  -6  14  109.29    9.80
  16  -6 -14  160.18  127.79
  14   6 -12  624.64   49.00
 -14   6  12  493.45   88.39
 -14   6  12  577.54   47.00
 -14   6  12  558.84   47.10
 -14  -6  12  579.64   47.30
 -14  -6  12  653.83   49.20
  14  -6 -12  650.13   53.69
 -12   6  10   18.40    7.50
 -12   6  10   11.30    1.50
  12   6 -10   16.50   34.90
 -12   6  10    7.20    1.20
 -12   6  10   11.20   46.80
  12   6 -10   10.50    4.90
 -12  -6  10    8.90    2.10
  12  -6 -10   -9.50   58.89
 -12  -6  10    7.40    4.90
  12  -6 -10    3.80    6.70
 -12  -6  10   33.40   41.70
 -10   6   8   17.40    2.00
  10   6  -8   15.00    3.70
 -10   6   8   16.10    1.80
  10   6  -8   10.00   23.00
 -10   6   8   25.10    6.00
 -10  -6   8   18.70   28.90
  10  -6  -8   16.90    5.50
 -10  -6   8   20.90    3.80
  10  -6  -8   30.40   40.30
 -10  -6   8   17.80    2.60
  -8   6   6  238.88   18.80
   8   6  -6  253.47   29.20
   8   6  -6  232.98   19.30
  -8   6   6  186.98   34.60
  -8   6   6  261.47   20.50
   8  -6  -6  231.68   20.20
  -8  -6   6  248.28   36.20
  -8  -6   6  228.48   19.00
   8  -6  -6  321.47   49.70
  -8  -6   6  242.38   19.30
  -6   6   4  490.25   40.60
  -6   6   4  587.94   41.50
  -6   6   4  440.06   50.69
   6   6  -4  540.55   40.70
   6   6  -4  571.94   42.90
  -6  -6   4  555.14   40.60
   6  -6  -4  448.06   41.30
  -6  -6   4  480.25   40.60
  -4   6   2 1427.36  119.09
  -4   6   2 1389.66  113.69
  -4  -6   2 1494.45  113.69
   4  -6  -2 1540.55  120.29
   4  -6  -2 1438.66  114.19
   2   6   0   30.80    2.60
   2   6   0   28.00    2.40
  -2   6   0   31.70    3.70
   2   6   0   17.90    5.90
  -2  -6   0   21.00    5.60
   2  -6   0   18.20   15.90
  -2  -6   0   25.30    2.50
  -2  -6   0   34.00    2.50
   2  -6   0   25.50    3.80
   0   6   2   68.69    5.80
   0   6   2   76.79    5.90
   0   6   2   88.69   14.10
   0   6   2   79.59    6.70
   0   6  -2   74.59   15.60
   0   6  -2   67.09    5.90
   0  -6   2   70.49    6.00
   0  -6  -2   75.99    6.40
   0  -6  -2  103.99   18.90
   0  -6   2   63.49    6.70
   0  -6   2   81.49    7.00
   2   6  -4 1634.94  138.39
  -2   6   4 1658.73  132.79
   2   6  -4 1577.34  132.79
  -2   6   4 1644.94  138.29
   2   6  -4 1901.81  139.49
  -2   6   4 1572.54  132.79
  -2   6   4 1813.42  133.39
  -2  -6   4 1673.23  132.89
   2  -6  -4 1861.21  139.79
  -2  -6   4 1774.12  133.29
   2  -6  -4 1647.24  133.29
   4   6  -6   28.30    4.80
  -4   6   6   22.60    2.30
  -4   6   6   19.70   22.70
   4   6  -6   45.40   22.60
  -4   6   6   28.60    2.30
  -4   6   6   30.70    5.50
  -4  -6   6   27.40    2.70
   4  -6  -6   21.00    4.10
  -4  -6   6   26.20    2.40
  -4  -6   6   18.60   27.40
  -4  -6   6   26.20    5.00
   4  -6  -6   12.20   26.80
  -6   6   8  378.46   30.50
   6   6  -8  361.16   31.60
  -6   6   8  394.36   30.50
  -6   6   8  337.27   53.79
  -6   6   8  407.06   32.20
   6   6  -8  476.75   56.39
  -6  -6   8  405.06   30.50
   6  -6  -8  353.06   31.80
   6  -6  -8  405.96   64.79
  -6  -6   8  390.86   63.99
  -6  -6   8  415.66   31.80
  -6  -6   8  386.16   30.60
  -8   6  10    7.10    7.00
  -8   6  10    0.30    1.10
   8   6 -10    7.30   40.00
   8   6 -10   -0.30    5.00
  -8   6  10    0.60   53.89
  -8   6  10    0.90    1.00
   8  -6 -10    0.70    5.40
  -8  -6  10  -12.40   51.19
  -8  -6  10    3.30    1.10
   8  -6 -10   15.70   51.59
  -8  -6  10   10.80    5.80
  -8  -6  10    3.30    1.60
  10   6 -12    1.20    6.80
 -10   6  12    0.90    1.30
 -10   6  12    7.00    9.90
 -10   6  12  -25.70   59.59
 -10   6  12    0.60    1.40
 -10  -6  12    0.30    1.20
 -10  -6  12    1.30    2.00
  10  -6 -12   14.30   75.09
  10  -6 -12    6.60    7.60
 -10  -6  12    2.70    7.50
 -12   6  14  565.64   40.80
 -12   6  14  506.45   40.50
 -12   6  14  427.46  103.69
 -12  -6  14  493.45   40.70
  12  -6 -14  320.27  128.39
 -14   6  16   70.49    6.70
 -14   6  16   72.79    6.40
 -14  -6  16   63.69    7.30
 -16   6  18    9.60    3.50
 -16   6  18   11.30    3.00
 -16  -6  18    5.90    4.00
 -18  -6  20   10.40    4.80
 -21   7  19   30.40    4.80
 -21  -7  19   26.00    5.50
 -19   7  17   14.70    2.80
 -19   7  17   14.20    3.50
 -19  -7  17   10.70    4.10
 -17   7  15  159.78   12.40
 -17   7  15  150.08   12.70
 -17  -7  15  145.89   13.20
  15   7 -13   22.00    9.50
 -15   7  13   30.80    3.20
 -15   7  13  107.19   85.99
 -15   7  13   32.00    3.80
 -15  -7  13   39.30    9.30
 -15  -7  13   27.20    3.80
  15  -7 -13   79.19  125.99
 -13   7  11  306.37   68.99
 -13   7  11  251.47   20.30
  13   7 -11  257.67   22.90
 -13   7  11  303.67   26.10
 -13   7  11  244.48   20.40
 -13  -7  11  252.37   20.70
 -13  -7  11  257.87   22.70
  13  -7 -11  249.88   24.60
  13  -7 -11  260.67   88.19
  11   7  -9  402.86   54.39
 -11   7   9  364.76   29.80
 -11   7   9  451.95   86.49
  11   7  -9  411.06   31.00
 -11   7   9  371.16   29.70
 -11  -7   9  394.56   30.80
 -11  -7   9  327.27   30.10
  11  -7  -9  416.36   32.40
 -11  -7   9  300.97   55.49
  -9   7   7    6.50    1.10
   9   7  -7   -1.10   17.80
  -9   7   7    5.60   29.00
  -9   7   7    3.70    5.10
   9   7  -7    9.20    3.00
  -9  -7   7    2.00    2.60
   9  -7  -7    6.60    5.10
  -9  -7   7    2.10    1.50
   9  -7  -7   22.20   39.10
  -9  -7   7   20.00   28.40
  -7   7   5  377.46   30.30
   7   7  -5  431.96   30.60
  -7   7   5  388.96   31.50
   7   7  -5  386.56   34.50
  -7   7   5  430.06   47.90
  -7  -7   5  357.16   37.80
  -7  -7   5  373.36   30.40
   7  -7  -5  368.06   31.40
  -7  -7   5  383.36   30.40
  -5   7   3    2.10    2.70
  -5   7   3    1.60   20.80
  -5   7   3    2.30    0.80
  -5  -7   3    2.80    1.00
   5  -7  -3   15.30   21.20
   5  -7  -3    1.10    2.60
  -3   7   1  308.87   24.20
  -3   7   1  252.47   34.50
  -3   7   1  331.37   24.80
   3  -7  -1  301.97   24.80
   1   7   1 1383.86  115.59
   1   7   1 1567.74  115.89
  -1   7  -1 1461.65  115.69
  -1   7  -1 1449.65  120.39
   1   7   1 1542.55  118.29
   1  -7   1 1488.35  115.69
  -1  -7  -1 1574.74  118.49
   1  -7   1 1302.97  116.19
   1  -7   1 1541.55  116.19
  -1  -7  -1 1510.15  115.79
  -1   7   3  139.39   24.50
   1   7  -3   71.69   18.80
   1   7  -3  108.59   22.90
   1   7  -3   98.89    8.20
  -1   7   3  102.79    8.20
  -1   7   3  111.19    8.20
  -1   7   3  109.99    9.10
   1  -7  -3  112.69   21.70
  -1  -7   3   92.99    9.30
  -1  -7   3  105.99    8.30
  -1  -7   3  104.69    9.30
   1  -7  -3   98.59    9.00
  -3   7   5   29.00    2.50
   3   7  -5   23.00   20.90
  -3   7   5   26.10    2.50
  -3   7   5   35.60    5.30
   3   7  -5   27.20   21.10
  -3   7   5   42.60   24.40
   3   7  -5   30.80    2.60
  -3  -7   5   22.80    4.30
   3  -7  -5   39.80   25.70
   3  -7  -5   29.40    4.90
  -3  -7   5   28.50    2.90
  -3  -7   5   30.00    5.10
  -5   7   7   67.39    8.30
  -5   7   7   14.40   29.60
  -5   7   7   54.39    4.70
   5   7  -7   56.09    7.40
   5   7  -7   73.89   27.80
  -5   7   7   54.09    4.70
   5  -7  -7   78.79   36.40
   5  -7  -7   56.19    7.70
  -5  -7   7   68.59    7.50
  -5  -7   7   31.10   36.00
  -5  -7   7   56.49    5.00
  -7   7   9   62.09    5.20
   7   7  -9   85.79   39.00
  -7   7   9   60.89    5.20
  -7   7   9   65.09   40.20
   7   7  -9   63.89    8.90
  -7   7   9   64.29   12.20
  -7  -7   9   15.10   49.10
  -7  -7   9   66.39    5.80
  -7  -7   9   56.39    9.00
   7  -7  -9   44.40   50.29
   7  -7  -9   64.49    9.80
   9   7 -11  343.77   33.20
  -9   7  11  438.16   34.90
  -9   7  11  431.76   31.10
  -9   7  11  389.56   31.10
  -9   7  11  436.96   86.79
  -9  -7  11  379.36   33.60
   9  -7 -11  487.75   86.19
   9  -7 -11  385.26   33.90
  -9  -7  11  391.86   31.30
 -11   7  13   94.99    7.90
 -11   7  13   95.09    8.00
 -11   7  13   60.19   81.59
 -11  -7  13   89.29    8.40
 -11  -7  13  109.89   16.80
  11  -7 -13   35.30  103.09
 -13   7  15   35.30    4.00
 -13   7  15   32.60    4.40
 -15   7  17  126.79   10.90
 -15   7  17  130.99   10.60
 -15  -7  17  114.19   11.30
 -17   7  19    1.20    4.20
 -17  -7  19    1.80    7.70
 -22   8  20    3.90    4.90
 -20   8  18    9.30    4.00
 -20  -8  18    6.20    4.90
 -18   8  16   14.40    2.50
 -18   8  16    4.20    3.10
 -18  -8  16   15.50    4.10
 -16   8  14   11.50    2.00
 -16   8  14    8.50    2.40
 -16  -8  14    6.60    3.20
  14   8 -12   75.49   12.60
 -14   8  12   58.79    5.30
 -14   8  12   58.69    5.70
 -14   8  12    9.00   78.79
 -14  -8  12   72.89   12.90
  14  -8 -12   84.49  107.49
 -12   8  10   51.19   88.79
  12   8 -10   55.09    8.90
 -12   8  10   46.50   11.30
 -12   8  10   43.10    4.20
 -12   8  10   46.70    4.30
  12  -8 -10   38.70    9.10
  12  -8 -10  106.09   78.09
 -12  -8  10   48.90    8.70
 -12  -8  10   45.40    5.10
  10   8  -8  190.08   15.40
 -10   8   8  178.08   14.10
 -10   8   8  116.69   44.40
  10   8  -8  207.98   37.50
  10  -8  -8  263.57   59.49
 -10  -8   8  172.98   15.10
 -10  -8   8  161.58   41.90
 -10  -8   8  167.38   14.60
  10  -8  -8  177.78   17.60
   8   8  -6  233.98   23.80
  -8   8   6  170.18   14.20
  -8   8   6  191.88   16.50
  -8   8   6  167.88   36.20
  -8  -8   6  179.98   14.40
   8  -8  -6  174.48   16.50
  -8  -8   6  172.38   14.40
  -6   8   4  290.57   22.90
  -6   8   4  322.67   24.10
  -6   8   4  228.38   41.40
   6  -8  -4  372.56   48.40
  -6  -8   4  286.27   22.90
   6  -8  -4  262.87   23.90
   4   8  -2  231.88   18.90
  -4   8   2  229.48   18.90
  -4   8   2  271.07   19.80
  -4   8   2  279.67   35.30
  -4  -8   2  232.58   18.90
   4  -8  -2  224.78   19.80
   4  -8  -2  274.17   39.80
   2   8   0  242.38   19.80
  -2   8   0  273.27   20.60
  -2   8   0  286.27   33.90
  -2   8   0  245.58   19.80
  -2  -8   0  271.67   19.90
   2  -8   0  223.18   20.50
   2  -8   0  241.58   39.40
   0   8   2  537.85   48.10
   0   8  -2  500.55   49.99
   0   8  -2  492.15   41.20
   0   8   2  581.64   41.20
   0   8   2  530.35   41.60
   0   8  -2  611.24   54.39
   0  -8  -2  519.15   41.50
   0  -8   2  495.15   41.30
   0  -8  -2  555.34   49.80
   0  -8   2  509.35   41.80
   0  -8   2  510.25   41.70
  -2   8   4   61.39    6.40
  -2   8   4   43.10   21.50
  -2   8   4   51.29    4.40
   2   8  -4   28.30   21.00
  -2   8   4   51.29    4.40
   2   8  -4   48.50    4.40
   2   8  -4   60.09   23.20
   2  -8  -4   49.90    6.10
  -2  -8   4   54.29    6.30
  -2  -8   4   55.29    4.60
   2  -8  -4   41.30   25.20
  -2  -8   4   61.19    6.60
  -4   8   6  486.25   37.90
  -4   8   6  403.86   57.49
   4   8  -6  477.25   37.90
   4   8  -6  527.35   56.49
   4   8  -6  511.15   57.79
  -4   8   6  484.15   37.90
  -4  -8   6  471.45   38.00
   4  -8  -6  463.65   38.90
  -4  -8   6  501.95   38.80
   4  -8  -6  571.74   66.29
  -6   8   8    7.10    1.20
  -6   8   8    9.50    1.20
   6   8  -8    5.70    4.80
  -6   8   8   11.20   36.40
   6   8  -8   -8.10   33.40
  -6   8   8   10.80    6.30
  -6  -8   8    4.80    1.90
   6  -8  -8   27.20   47.20
  -6  -8   8  -14.70   45.30
  -6  -8   8    6.60    4.60
   6  -8  -8    5.20    4.90
  -8   8  10  130.99   10.70
   8   8 -10  137.09   14.70
  -8   8  10  132.49   10.70
  -8   8  10  229.18   55.49
  -8  -8  10  132.69   14.60
   8  -8 -10  171.08   69.89
  -8  -8  10  134.89   11.10
 -10   8  12    4.80    1.50
  10   8 -12   -1.60    8.00
 -10   8  12    5.30   82.29
 -10   8  12    2.40    1.60
  10  -8 -12  -21.60   96.19
 -10  -8  12    0.00    2.20
 -10  -8  12   13.50    9.00
 -12   8  14   31.20    4.00
 -12   8  14   32.60    3.70
 -12  -8  14   27.10    4.50
 -14   8  16    5.20    2.80
 -14   8  16    4.60    2.30
 -14  -8  16    0.60    3.40
 -16   8  18   15.80    3.40
 -16   8  18   12.50    3.90
 -16  -8  18    6.60    4.40
 -21   9  19  169.98   15.40
 -19   9  17    4.70    2.90
 -19   9  17   10.40    3.70
 -19  -9  17    4.40    5.70
 -17   9  15   12.30    2.40
 -17   9  15    9.50    4.80
 -17  -9  15    4.60    4.00
 -15   9  13   13.10    2.60
 -15   9  13   16.00    2.10
 -15  -9  13   13.20    3.80
 -13   9  11   12.40    1.70
 -13   9  11    7.80    2.00
  13   9 -11   14.80    7.20
 -13  -9  11    9.30    3.00
  13  -9 -11   67.99  107.69
 -13  -9  11    8.80    6.30
 -11   9   9  448.26   35.90
 -11   9   9  471.35   36.00
 -11   9   9  472.55   86.49
 -11  -9   9  450.55   36.70
 -11  -9   9  446.26   36.30
  11  -9  -9  686.13  110.59
  -9   9   7  334.77   62.09
  -9   9   7  328.17   24.70
  -9   9   7  343.77   27.40
  -9  -9   7  284.57   24.80
   9  -9  -7  342.77   27.10
  -9  -9   7  292.67   25.10
   9  -9  -7  427.76   64.89
  -9  -9   7  289.97   24.90
  -7   9   5  155.58   12.60
  -7   9   5  180.38   15.10
  -7   9   5  138.59   35.30
   7  -9  -5  149.39   17.20
   7  -9  -5  177.98   43.70
  -7  -9   5  151.68   12.80
   5   9  -3  967.10   77.09
  -5   9   3 1101.69   77.99
  -5   9   3  976.00   88.19
  -5   9   3  974.40   77.09
   5  -9  -3  842.32   77.79
   5  -9  -3 1136.99   93.89
  -5  -9   3  974.80   77.19
   3   9  -1    8.30    1.30
  -3   9   1    6.30    1.10
  -3   9   1   19.40   20.70
  -3   9   1    9.40    3.40
   3  -9  -1  -25.20   28.10
  -3  -9   1    6.90    1.30
   3  -9  -1    8.00    3.20
  -1   9  -1   42.70   19.60
  -1   9  -1   37.20    3.30
   1   9   1   42.60    4.20
   1   9   1   39.80   13.50
  -1   9  -1   40.20   25.00
   1   9   1   39.50    3.20
   1  -9   1   27.50    5.20
   1  -9   1   40.10    6.10
  -1  -9  -1   24.20   18.60
  -1  -9  -1   35.30    4.00
   1   9  -3  166.08   30.90
  -1   9   3  205.08   15.40
   1   9  -3  178.98   14.50
  -1   9   3  159.58   14.40
  -1   9   3  185.98   14.50
  -1   9   3  166.88   27.30
   1   9  -3  213.78   32.80
  -1  -9   3  195.78   15.60
   1  -9  -3  205.58   38.00
  -1  -9   3  186.58   14.60
   1  -9  -3  182.38   15.20
  -1  -9   3  173.08   15.40
   3   9  -5  738.53   60.29
  -3   9   5  720.33   60.19
  -3   9   5  832.22   76.49
   3   9  -5  906.71   74.79
  -3   9   5  847.42   61.29
  -3   9   5  713.13   60.19
  -3  -9   5  798.32   61.59
   3  -9  -5  967.20   83.39
  -3  -9   5  779.32   60.89
   3  -9  -5  692.13   61.29
  -3  -9   5  712.13   60.39
  -5   9   7  546.95   45.40
   5   9  -7  483.75   94.69
   5   9  -7  558.64   45.40
  -5   9   7  651.63   47.10
  -5   9   7  559.54   73.89
   5   9  -7  587.24   68.29
  -5   9   7  541.15   45.40
   5  -9  -7  770.52   97.99
  -5  -9   7  582.74   46.30
  -5  -9   7  567.94   45.60
   5  -9  -7  608.94   46.70
  -7   9   9  317.57   26.00
  -7   9   9  315.27   26.00
  -7   9   9  296.87   60.79
  -7  -9   9  350.46   28.10
  -7  -9   9  346.57   26.30
   7  -9  -9  357.46   73.99
  -9   9  11   51.79    4.80
  -9   9  11   49.50    4.70
   9   9 -11   58.99   11.20
  -9   9  11   47.90   67.29
  -9  -9  11   45.60    9.40
   9  -9 -11   55.59   89.99
  -9  -9  11   58.09    5.50
 -11   9  13   37.30    4.20
 -11   9  13   36.40    3.90
 -11  -9  13   31.80    5.10
 -13   9  15  115.69    9.50
 -13  -9  15   99.49   10.10
 -15   9  17    8.20    3.80
 -15   9  17    9.30    3.00
 -15  -9  17    6.20    4.30
 -18  10  16  232.78   20.50
 -18  10  16  271.37   20.20
 -18 -10  16  246.38   21.30
 -16  10  14    1.00    3.90
 -16  10  14    3.40    2.00
 -16 -10  14    0.00    3.70
 -14  10  12   40.30    4.00
 -14  10  12   42.60    4.40
 -14 -10  12   42.90    8.70
 -14 -10  12   23.10    5.70
 -12  10  10  106.89    8.60
 -12  10  10  116.59    8.80
 -12 -10  10   91.09   12.00
 -12 -10  10   93.99    9.50
 -10  10   8  395.36   31.80
 -10  10   8  432.96   31.90
 -10  10   8  400.36   65.59
 -10 -10   8  372.96   32.10
  10 -10  -8  688.83  106.19
  -8  10   6 1239.78   96.29
  -8  10   6 1252.67  127.89
   8 -10  -6 1497.45  126.99
  -8 -10   6 1107.89   96.39
   6  10  -4  606.84   46.00
  -6  10   4  628.54   67.89
  -6  10   4  628.54   47.30
  -6  10   4  561.14   46.00
   6 -10  -4  717.63   78.29
   6 -10  -4  543.85   47.10
  -6 -10   4  552.34   46.10
  -4  10   2   11.30    1.80
  -4  10   2   22.20   26.40
  -4  10   2   13.50    4.40
   4  10  -2   14.10    1.70
  -4 -10   2   14.40    2.20
   4 -10  -2    8.10    3.70
   4 -10  -2    0.80   34.70
   2  10   0  140.69   10.20
  -2  10   0  130.59   10.20
  -2  10   0  115.59   26.00
   2 -10   0  100.49   12.90
   0  10   2  480.35   49.40
   0  10   2  444.66   38.20
   0  10  -2  489.05   38.30
   0  10   2  525.85   39.00
   0  10  -2  637.24   60.49
   0 -10  -2  485.65   38.60
   0 -10   2  528.95   39.10
   0 -10   2  418.16   39.30
   0 -10  -2  491.85   51.19
   2  10  -4  244.68   37.00
  -2  10   4  214.78   40.00
  -2  10   4  283.47   21.00
   2  10  -4  242.28   40.00
  -2  10   4  240.98   19.70
  -2  10   4  245.08   19.70
  -2 -10   4  245.98   20.60
  -2 -10   4  256.47   20.80
   2 -10  -4  254.17   42.60
   2 -10  -4  236.38   20.70
  -4  10   6  543.25   73.99
   4  10  -6  570.44   46.50
  -4  10   6  593.94   46.50
  -4  10   6  634.94   46.50
   4  10  -6  596.44   67.39
  -4 -10   6  587.04   47.30
   4 -10  -6  763.02   87.69
  -4 -10   6  566.74   47.90
  -4 -10   6  592.24   46.70
   6  10  -8  712.63   56.49
  -6  10   8  773.82   56.39
  -6  10   8  719.23   56.39
  -6  10   8  736.23   95.19
   6  10  -8  762.22   90.29
   6 -10  -8 1022.10  117.89
  -6 -10   8  666.63   56.59
  -6 -10   8  676.93   57.39
  -8  10  10  375.86   28.20
  -8  10  10  373.66   28.10
  -8 -10  10  328.27   30.60
  -8 -10  10  347.77   28.50
   8 -10 -10  289.47  111.69
 -10  10  12   17.50    2.40
 -10  10  12   15.50    2.20
 -10 -10  12    9.90    3.60
 -12  10  14   37.40    4.70
 -12  10  14   39.50    4.30
 -12 -10  14   28.30    4.70
 -14  10  16   24.00    3.50
 -14  10  16   30.10    4.80
 -14 -10  16   26.10    4.80
 -16  10  18  122.09   10.90
 -16 -10  18  112.99   12.90
 -19  11  17    0.10    3.30
 -19  11  17   -0.50    4.30
 -17  11  15    2.50    3.20
 -17  11  15    1.90    2.60
 -17 -11  15   -0.20    4.80
 -15  11  13    4.80    2.00
 -15  11  13    6.30    2.90
 -15 -11  13    0.70    3.90
 -13  11  11  176.78   14.10
 -13  11  11  158.38   13.90
 -13 -11  11  189.78   15.10
 -11  11   9  100.69    8.50
 -11  11   9  106.79    8.30
 -11 -11   9   91.09    9.10
  -9  11   7   75.19   55.39
  -9  11   7   85.99    6.90
   9 -11  -7   68.59   70.29
  -9 -11   7   71.79    7.30
   7  11  -5   66.59    5.80
  -7  11   5   72.69   42.90
  -7  11   5   79.49    5.90
  -7 -11   5   55.99    6.20
   7 -11  -5  139.99   58.09
  -5  11   3  531.15   67.39
   5  11  -3  503.45   43.90
  -5 -11   3  615.94   44.10
   5 -11  -3  624.34   81.19
   3  11  -1   79.59    6.20
  -3  11   1   32.20   28.00
  -3 -11   1   75.29    6.50
   3 -11  -1   68.89    8.40
   3 -11  -1   98.79   41.50
  -1  11  -1   17.10   23.80
  -1  11  -1   11.30    1.50
   1  11   1    6.60    1.30
  -1  11  -1    6.00   32.90
   1 -11   1    7.40    3.50
   1 -11   1    8.40    4.60
  -1  11   3   15.80   26.80
   1  11  -3   22.40   24.10
   1  11  -3    2.30    1.10
  -1 -11   3    2.20    1.70
   1 -11  -3    1.90    3.60
  -1 -11   3    2.40    3.20
   1 -11  -3   -5.90   29.80
  -1 -11   3    5.80    3.80
  -3  11   5  448.46   69.79
   3  11  -5  420.96   50.19
  -3  11   5  401.86   29.80
  -3  11   5  353.06   29.80
   3  11  -5  369.26   29.80
  -3 -11   5  359.66   30.00
  -3 -11   5  392.36   30.70
   3 -11  -5  417.76   73.19
  -5  11   7  217.58   16.90
  -5  11   7  253.47   56.79
  -5  11   7  230.68   16.90
   5  11  -7  163.28   43.10
   5  11  -7  213.18   16.90
   5 -11  -7  189.78   69.19
  -5 -11   7  209.08   18.40
  -5 -11   7  192.78   17.20
   7  11  -9   97.29   60.29
  -7  11   9  113.59    9.30
   7  11  -9  112.49    9.30
  -7  11   9  116.89    9.30
  -7 -11   9  109.19    9.90
  -7 -11   9  115.89   13.60
  -9  11  11    1.90    1.70
  -9  11  11    2.70    1.90
   9  11 -11    5.00    2.10
  -9 -11  11   -0.10    3.30
 -11  11  13  208.68   15.70
 -11  11  13  188.98   15.60
 -11 -11  13  180.98   16.30
 -13  11  15   48.10    5.60
 -13 -11  15   53.69    7.60
 -15  11  17    5.10    3.50
 -15 -11  17    3.40    5.00
 -18  12  16    3.40    3.20
 -18  12  16   -0.40    4.00
 -18 -12  16    8.20    9.20
 -16  12  14  139.99   12.30
 -16  12  14  134.59   11.70
 -16 -12  14  147.99   13.60
 -14  12  12   90.49    7.70
 -14 -12  12   83.39    9.70
 -12  12  10   -1.60    2.10
 -12 -12  10   -0.10    3.40
 -10  12   8  115.39    9.80
  10  12  -8  127.59    9.70
 -10  12   8  112.49    9.60
 -10 -12   8  110.19   10.50
  -8  12   6    8.70    2.00
  -8  12   6   52.59   54.69
   8 -12  -6  -58.89   72.19
  -8 -12   6   11.20    2.70
  -6  12   4   24.90    3.00
   6  12  -4   26.20    2.80
  -6 -12   4   28.00    3.70
   6 -12  -4  101.49   62.29
  -4  12   2  415.36   32.70
  -4  12   2  381.56   61.89
   4  12  -2  390.36   32.60
  -4 -12   2  448.06   32.80
   4 -12  -2  404.46   66.99
   2  12   0  187.08   15.40
  -2  12   0  184.38   34.60
  -2  12   0  198.98   15.50
   2 -12   0  198.98   17.70
   0  12   2  424.06   32.70
   0  12  -2  462.05   50.09
   0  12  -2  430.86   32.70
   0  12   2  409.46   32.60
   0 -12   2  384.06   33.60
  -2  12   4  174.18   13.10
  -2  12   4  170.98   42.00
   2  12  -4  176.28   13.10
  -2  12   4  156.58   13.10
  -2 -12   4  151.28   13.40
  -2 -12   4  161.28   14.40
   2 -12  -4  129.49   47.00
   4  12  -6   24.80   30.40
  -4  12   6    4.20    1.50
  -4  12   6    0.70    1.30
  -4  12   6  -47.00   49.30
   4  12  -6    2.30    1.40
  -4 -12   6   -1.10    5.60
  -4 -12   6   -0.80    2.20
   4 -12  -6    7.70   59.89
   6  12  -8   38.70   44.90
  -6  12   8   11.80    1.90
   6  12  -8   15.30    2.00
  -6 -12   8   11.20    5.90
  -6 -12   8    8.60    2.80
   8  12 -10  198.78   15.70
  -8  12  10  198.48   15.60
  -8  12  10  184.98   15.80
  -8 -12  10  196.88   16.40
  10  12 -12   31.60    4.10
 -10  12  12   36.50    4.40
 -10  12  12   29.00    3.90
 -10 -12  12   33.50    4.80
 -12  12  14  141.99   11.90
 -12 -12  14  142.09   13.30
  14  12 -16   44.90    5.60
 -14  12  16   34.50    6.50
 -14 -12  16   34.50    6.30
 -17  13  15   82.09    9.20
 -17  13  15   84.79    8.20
 -15  13  13    1.40    2.50
 -15  13  13    3.40    3.20
 -15 -13  13    2.00    4.90
 -13  13  11  165.18   13.90
  13  13 -11  178.48   13.80
 -13  13  11  159.48   13.60
 -13 -13  11  164.18   15.10
  11  13  -9  192.98   15.90
 -11  13   9  210.78   15.90
 -11  13   9  183.98   15.70
 -11 -13   9  193.68   16.70
  -9  13   7   20.70    3.10
  -9  13   7   35.40    3.80
   9  13  -7   27.00    3.60
  -9 -13   7   28.10    4.00
  -7  13   5   56.79    5.00
   7  13  -5   48.70    4.70
  -7 -13   5   46.10    5.80
  -5  13   3   65.99   46.00
  -5  13   3   22.70    3.00
   5  13  -3   20.00    2.70
   5 -13  -3  -26.50   67.89
  -5 -13   3   20.70    3.00
  -3  13   1  137.69   41.10
  -3  13   1  209.58   17.10
   3  13  -1  229.58   17.10
   3 -13  -1  215.08   20.30
  -1  13  -1  632.94   52.59
   1  13   1  712.13   52.59
  -1  13  -1  700.23   85.29
   1  13   1  660.03   52.49
  -1  13   3   77.29    6.60
  -1  13   3   78.99    6.70
   1  13  -3   78.09    6.70
  -1  13   3   67.89   34.60
   1 -13  -3  122.59   40.30
  -3  13   5   58.99    4.80
  -3  13   5   46.60    4.60
   3  13  -5   51.59    4.80
  -3  13   5    2.70   52.59
   3 -13  -5   82.99   62.09
  -3 -13   5   42.60    5.60
  -5  13   7   27.60    3.60
  -5  13   7   25.20    3.50
   5  13  -7   29.00    3.30
  -5 -13   7   26.60    3.90
  -7  13   9   36.00    4.20
   7  13  -9   37.60    4.20
  -7  13   9   43.60    4.40
  -9  13  11  103.79    9.10
  -9  13  11   95.89    8.80
   9  13 -11  109.39    9.00
  -9 -13  11  111.19   10.30
 -11  13  13   64.29    6.60
  11  13 -13   68.39    6.60
 -11 -13  13   69.99    8.50
  13  13 -15    1.20    3.10
 -13  13  15    4.60    3.10
 -13 -13  15    0.40    5.10
 -16  14  14    4.00    4.40
 -16  14  14    3.30    3.10
 -14  14  12   44.40    6.10
 -14  14  12   46.70    5.30
 -12  14  10    4.40    2.20
  12  14 -10   -2.60    2.50
 -12  14  10    1.00    2.80
 -12 -14  10    1.60    4.60
  10  14  -8   26.40    3.80
  10  14  -8   25.70    3.50
 -10  14   8   21.10    3.80
 -10  14   8   24.90    3.40
 -10 -14   8   22.40    4.50
  -8  14   6   38.70    4.50
  -6  14   4    3.50    1.90
   6  14  -4    2.80    1.80
  -6 -14   4   -0.50    2.70
   4  14  -2  161.58   11.80
  -4  14   2   89.69   58.29
  -4  14   2  151.78   11.90
   4  14  -2  125.49   11.80
  -2  14   0    0.40    1.60
   2  14   0    2.80    1.70
   2  14   0   -1.50    1.50
   0  14  -2    6.70    1.70
   0  14   2    8.00    1.70
   0  14   2    5.50    1.80
   2  14  -4  116.29   10.20
  -2  14   4  130.09   10.10
  -4  14   6   25.90    3.60
   4  14  -6   27.20    3.40
  -4  14   6   20.60    3.30
  -4 -14   6   28.30    4.00
  -6  14   8   71.39    6.00
   6  14  -8   62.49    5.90
  -6  14   8   49.70    5.50
  -6 -14   8   61.29    7.40
  -8  14  10    8.20    2.20
   8  14 -10   -0.20    2.20
  -8  14  10    3.20    2.60
  -8 -14  10   -0.80    3.90
 -10  14  12    0.90    2.50
 -12  14  14  100.39    9.30
 -13  15  11   23.80    4.20
 -13  15  11   25.00    3.80
  13  15 -11   34.90    5.00
 -13 -15  11   18.10    6.10
 -11  15   9   14.10    2.90
  11  15  -9   16.00    2.90
  11  15  -9   15.60    3.10
 -11  15   9   17.40    3.40
 -11 -15   9   21.60    5.40
   9  15  -7  167.48   13.70
  -9  15   7  172.38   13.80
   9  15  -7  181.48   13.50
  -9  15   7  144.49   13.50
  -9 -15   7  164.18   14.80
  -7  15   5   20.00    3.10
   7  15  -5   17.10    2.80
   7  15  -5   24.10    3.30
  -7 -15   5   19.20    4.00
   5  15  -3    1.90    1.80
  -5  15   3    7.10    2.60
   5  15  -3    0.60    1.80
   3  15  -1   68.89    6.40
  -3  15   1   77.49    6.90
   1  15   1   19.40    2.70
  -1  15  -1   22.70    3.40
   1  15   1   22.20    3.10
  -1  15   3   67.59    6.20
   1  15  -3   72.39    6.30
  -1  15   3   69.19    6.40
  -3  15   5   23.50    3.50
  -3  15   5   13.70    2.40
   3  15  -5   18.40    2.60
  -5  15   7   40.20    4.00
  -5  15   7   33.30    4.50
   5  15  -7   27.60    4.00
  -5 -15   7   24.50    4.70
  -7  15   9  126.59   10.80
   7  15  -9  124.69   10.70
  -7  15   9  116.39   10.50
  -7 -15   9  134.79   12.20
   9  15 -11   11.80    3.00
  -9  15  11   11.90    2.90
  -9 -15  11    5.80    5.30
 -14  16  12   18.10    4.80
  12  16 -10   28.60    4.30
 -12  16  10   28.90    4.70
 -12  16  10   33.70    4.90
 -12 -16  10   30.70    7.00
  10  16  -8   75.29    7.00
 -10  16   8   65.59    7.60
  10  16  -8   68.89    7.30
 -10 -16   8   86.09    9.90
  -8  16   6   13.20    2.60
   8  16  -6    7.30    2.60
   8  16  -6   10.00    2.50
  -8  16   6   11.40    3.00
  -8 -16   6    9.20    4.40
  -6  16   4  255.37   19.00
   6  16  -4  196.98   18.80
   6  16  -4  251.17   18.80
   4  16  -2   28.80    4.00
   4  16  -2   30.10    3.80
  -4  16   2   32.10    4.20
   2  16   0  181.58   15.30
  -2  16   0  198.18   15.40
   0  16   2  201.38   15.90
   0  16   2  203.98   15.80
   0  16  -2  181.88   15.90
  -2  16   4   33.00    4.10
  -2  16   4   40.40    4.70
   2  16  -4   33.40    4.40
  -4  16   6   94.89    8.50
   4  16  -6   94.99    8.70
  -4  16   6  107.39    8.90
   6  16  -8   15.10    3.20
  -8  16  10   44.80    5.70
   8  16 -10   54.99    6.20
  -8 -16  10   44.90    7.20
 -11  17   9   31.80    5.10
  -9  17   7   -1.50    3.50
   9  17  -7    1.40    3.00
  -9  17   7    0.10    2.70
   9  17  -7    2.20    3.00
   7  17  -5   14.50    3.00
  -7  17   5   15.20    3.40
   7  17  -5   14.70    3.10
  -7  17   5   18.30    3.10
   5  17  -3    8.00    2.70
  -5  17   3    8.90    2.90
   5  17  -3   11.70    2.60
   3  17  -1   31.80    4.80
   3  17  -1   38.20    4.50
  -3  17   1   44.10    4.90
   1  17   1   70.79    6.70
  -1  17  -1   66.89    6.70
   1  17   1   70.19    6.60
   1  17  -3   31.50    4.40
  -1  17   3   25.30    3.50
  -1  17   3   32.30    3.80
  -3  17   5   41.10    5.70
  -3  17   5   42.30    5.50
   3  17  -5   33.00    5.10
  -5  17   7    3.70    2.60
   5  17  -7   10.70    3.00
 -10  18   8   -1.50    5.20
   8  18  -6   71.29    7.60
   8  18  -6   70.09    7.60
  -8  18   6   70.89    8.20
  -6  18   4   31.70    4.50
   6  18  -4   18.70    3.80
  -6  18   4   21.30    5.20
   4  18  -2   15.00    3.40
   4  18  -2   11.10    3.10
  -4  18   2   14.40    3.00
   2  18   0   10.30    2.80
   2  18   0   10.20    3.20
   0  18  -2   38.50    5.20
   0  18   2   38.70    4.80
   0  18   2   35.80    5.50
  -2  18   4    4.40    4.00
   2  18  -4    7.70    3.40
  -2  18   4    9.30    2.90
   3  19  -1   67.99    7.70
   1  19   1   15.30    4.00
 -24   0  21    5.60    4.80
 -22   0  19   -0.80    3.60
 -20   0  17   -0.50    2.90
  18   0 -15    5.30   11.70
 -18   0  15   -1.00    2.20
 -18   0  15   -2.90   13.90
  16   0 -13  -43.70   66.59
 -16   0  13   17.50    9.20
 -16   0  13    1.00    1.70
 -16   0  13  -23.00   79.79
  16   0 -13   -8.80    7.90
 -14   0  11   -1.80    6.10
 -14   0  11  -28.00   42.10
  14   0 -11   28.10   46.50
 -14   0  11   -0.70    1.30
  14   0 -11   -0.90    5.40
 -12   0   9   -4.30   29.20
  12   0  -9    0.40    4.10
 -12   0   9    0.60    1.00
 -12   0   9   -2.30    3.90
  12   0  -9  -33.10   31.40
 -10   0   7  -13.60   19.50
 -10   0   7   -1.00    0.80
  10   0  -7    0.70    2.80
 -10   0   7   -0.20    2.90
  10   0  -7    2.70   20.20
   8   0  -5   12.10   14.80
   8   0  -5    1.50    2.10
  -8   0   5    2.70    0.70
  -8   0   5    3.70   13.10
  -8   0   5    1.90    0.30
  -8   0   5    0.90    2.10
  -6   0   3    0.00    0.40
  -6   0   3    0.50    0.30
   6   0  -3    3.40    1.50
  -6   0   3   -2.40    9.20
  -6   0   3    0.00    1.20
   6   0  -3    2.00    9.60
   6   0  -3    1.10    0.30
  -4   0   1   -5.00    7.00
   4   0  -1   -4.50    0.40
   4   0  -1   -4.90    1.00
   4   0  -1   -5.30    0.30
  -4   0   1   -5.50    0.30
  -4   0   1   -3.80    1.00
  -4   0   1   -4.60    0.30
   4   0  -1  -13.30    6.80
  -2   0  -1   -5.70    6.80
   2   0   1    0.50    1.00
  -2   0  -1    0.30    0.40
   2   0   1   -0.40    7.90
  -2   0  -1    2.10    1.10
   2   0   1   -0.10    0.20
   2   0   1   -0.40    0.40
   0   0   3    2.80   10.90
   0   0   3    0.20    0.50
   0   0   3    1.30    1.60
   0   0  -3    0.10    0.30
   0   0  -3    0.40    1.40
   0   0  -3   -5.00   11.30
   2   0  -5   -6.70   16.80
   2   0  -5   -1.10    1.90
  -2   0   5    0.30    0.60
  -2   0   5    1.20    0.50
  -2   0   5   -3.70   15.00
  -2   0   5    1.40    2.20
  -4   0   7   -1.00   22.40
  -4   0   7   -0.10    0.80
   4   0  -7    1.10    2.80
   4   0  -7   28.00   24.60
  -4   0   7    1.20    3.20
  -4   0   7    0.60    0.70
  -6   0   9   -1.00    0.80
   6   0  -9   -2.80    3.80
   6   0  -9  -11.50   33.50
  -6   0   9   -0.60    0.90
  -6   0   9   -8.90   30.80
  -6   0   9    6.50    4.60
  -8   0  11    2.20    6.60
   8   0 -11   -0.60    5.80
   8   0 -11  -23.60   47.70
  -8   0  11   -0.60    1.10
  -8   0  11   10.70   41.80
  10   0 -13    4.50   68.79
 -10   0  13    1.90    1.50
  10   0 -13    1.80    7.80
 -10   0  13   53.69   60.29
 -10   0  13    2.50    1.50
 -10   0  13   -6.20   11.00
  12   0 -15  112.99  103.59
 -12   0  15   78.09   90.69
 -14   0  17    1.90    2.30
 -14   0  17    1.90    2.50
 -16   0  19    4.30    3.50
 -18   0  21    4.70    4.60
 -23   1  20   -4.30    4.10
 -23  -1  20    2.90    4.80
 -21   1  18    2.10    3.20
 -21  -1  18    3.30    3.10
 -19   1  16  230.58   19.50
 -19  -1  16  251.67   19.60
 -17   1  14  142.39   76.29
 -17   1  14  154.98   14.10
  17   1 -14  187.18   19.50
  17  -1 -14  173.68   91.89
 -17  -1  14  209.18   21.10
  17  -1 -14  178.08   20.60
 -17  -1  14  170.78   14.20
 -15   1  12    8.00    1.00
 -15   1  12   18.80   52.29
  15   1 -12   -8.30   67.89
 -15   1  12    5.10    7.50
  15   1 -12    6.90    6.40
 -15  -1  12    5.10    1.80
 -15  -1  12  -10.30   49.99
 -15  -1  12    3.80    7.00
  15  -1 -12   29.10   57.99
  15  -1 -12    5.30    6.80
  13   1 -10  102.29   39.60
 -13   1  10   59.79    4.70
 -13   1  10   72.99   38.50
 -13   1  10   71.09    9.80
  13   1 -10   69.89    8.70
 -13   1  10   52.89    5.00
 -13  -1  10   52.29    5.10
  13  -1 -10   54.09    8.80
 -13  -1  10   67.49    9.00
  13  -1 -10   79.59   43.20
 -13  -1  10   64.19   36.40
 -11   1   8   12.20   25.40
  11   1  -8    5.90    3.40
 -11   1   8    3.80    0.90
  11   1  -8    1.60   23.30
 -11   1   8   -1.00    3.60
 -11  -1   8    2.20    1.00
 -11  -1   8    7.10    3.40
  11  -1  -8   -0.30    3.50
 -11  -1   8    6.20   24.00
  11  -1  -8   -3.30   28.40
  -9   1   6  952.90   86.49
  -9   1   6  995.50   79.29
  -9   1   6  975.10   78.59
  -9   1   6 1140.09   78.59
   9   1  -6  973.00   79.19
   9   1  -6 1149.08   86.39
  -9  -1   6 1042.30   79.29
   9  -1  -6 1139.79   88.39
   9  -1  -6  916.41   79.29
  -9  -1   6  944.51   78.69
  -9  -1   6  873.81   85.59
  -7   1   4   50.49    4.00
  -7   1   4   29.70   13.50
   7   1  -4   51.69    4.90
  -7   1   4   47.80    4.00
  -7   1   4   48.10    5.10
   7   1  -4   69.49   13.60
   7  -1  -4   61.19   15.90
   7  -1  -4   43.40    5.00
  -7  -1   4   54.39   12.50
  -7  -1   4   54.79    4.10
  -5   1   2  768.62   64.39
  -5   1   2  768.22   67.79
  -5   1   2  817.22   64.09
   5   1  -2  820.42   63.99
   5   1  -2  941.71   64.09
   5   1  -2  747.33   64.29
   5   1  -2  838.82   66.89
  -5   1   2  885.11   63.99
  -5  -1   2  950.90   64.09
   5  -1  -2  937.61   74.79
   5  -1  -2  736.43   64.39
  -5  -1   2  691.23   66.59
  -5  -1   2  759.02   64.29
   5  -1  -2  847.72   64.09
  -3   1   0   82.89    7.30
  -3   1   0   82.09    6.80
   3   1   0   87.79    6.80
   3   1   0   87.19    7.20
  -3   1   0   84.49    6.80
   3  -1   0   85.59    6.80
  -3  -1   0   74.39   12.80
   3  -1   0   81.79    6.80
   3  -1   0   75.29    7.30
   3  -1   0   67.69   12.20
  -3  -1   0   95.39    6.80
  -1   1  -2  653.43   49.50
  -1   1  -2  585.44   49.90
   1   1   2  674.93   49.60
   1   1   2  628.34   49.90
   1   1   2  580.14   53.69
   1  -1   2  640.74   49.50
   1  -1   2  650.33   49.60
  -1  -1  -2  612.24   49.90
  -1  -1  -2  654.63   53.99
  -1   1   4  418.86   32.60
  -1   1   4  422.96   32.00
  -1   1   4  390.86   40.00
   1   1  -4  384.46   40.50
   1   1  -4  380.06   32.50
  -1   1   4  447.16   32.00
  -1  -1   4  396.06   32.60
   1  -1  -4  489.45   41.20
   1  -1  -4  390.66   32.50
  -1  -1   4  334.97   40.70
  -1  -1   4  412.86   32.10
   1  -1  -4  416.56   32.00
  -1  -1   4  411.06   32.00
   3   1  -6  114.99   25.00
  -3   1   6  120.79    9.10
  -3   1   6  112.19   10.30
  -3   1   6  116.69    9.10
  -3   1   6   97.29   23.90
   3   1  -6  102.49   10.10
   3  -1  -6  172.28   30.80
   3  -1  -6   98.39   10.10
  -3  -1   6  130.69   26.00
  -3  -1   6  118.09    9.10
  -3  -1   6  122.09    9.10
  -3  -1   6  116.69   12.80
  -5   1   8  396.06   29.90
  -5   1   8  366.96   28.50
   5   1  -8  335.37   29.50
  -5   1   8  330.17   50.19
   5   1  -8  451.85   53.89
  -5   1   8  378.16   28.50
  -5  -1   8  367.56   28.50
  -5  -1   8  366.66   28.50
  -5  -1   8  336.17   50.49
   5  -1  -8  411.46   52.29
   5  -1  -8  304.77   29.50
  -5  -1   8  375.46   29.80
  -7   1  10  180.18   14.30
  -7   1  10  167.88   14.20
  -7   1  10  169.08   17.20
   7   1 -10  242.18   47.70
  -7   1  10  124.79   43.20
  -7  -1  10  189.98   14.30
   7  -1 -10  173.08   16.60
  -7  -1  10  234.48   46.90
   7  -1 -10  221.38   48.30
  -7  -1  10  186.28   16.90
  -7  -1  10  181.08   14.20
   9   1 -12  239.98   24.20
  -9   1  12  218.38   61.39
   9   1 -12  209.08   64.39
  -9   1  12  285.07   21.30
  -9   1  12  267.87   21.30
  -9   1  12  252.47   25.00
   9  -1 -12  274.37   24.40
  -9  -1  12  281.57   25.10
  -9  -1  12  195.88   59.99
  -9  -1  12  273.67   21.30
   9  -1 -12  309.47   65.09
  -9  -1  12  280.47   21.30
 -11   1  14  155.78   76.79
  11   1 -14  203.78   81.99
 -11   1  14  200.08   16.50
 -11   1  14  248.68   25.60
 -11   1  14  228.78   16.50
  11   1 -14  186.78   22.00
 -11  -1  14  160.88   77.79
  11  -1 -14  129.19   89.39
  11  -1 -14  163.58   22.50
 -11  -1  14  205.58   16.50
 -11  -1  14  210.48   16.40
 -11  -1  14  202.68   23.90
 -13   1  16   42.30  110.69
 -13   1  16    8.90   15.90
 -13   1  16    2.50    2.20
 -13   1  16    2.60    2.00
  13  -1 -16  -12.70   13.70
  13  -1 -16   34.50  136.09
 -13  -1  16    2.90    2.00
 -13  -1  16    2.60    2.30
 -15   1  18   15.70    3.20
 -15  -1  18   14.90    3.40
 -17  -1  20   58.99    7.80
 -19   1  22   16.40    5.40
 -19  -1  22    8.20    5.40
 -24   2  21   11.30    4.80
 -24  -2  21    6.00    5.10
 -22   2  19  211.88   17.90
 -22  -2  19  214.18   18.00
 -20   2  17   12.00    3.00
 -20  -2  17    7.10    3.20
 -18   2  15   35.60   14.90
 -18   2  15   -3.60   86.09
 -18   2  15   37.80    4.80
  18  -2 -15  143.09  118.39
 -18  -2  15   47.00    5.00
  18  -2 -15   45.00   14.00
 -16   2  13  398.16   74.79
  16   2 -13  350.16   30.30
 -16   2  13  303.97   33.90
 -16   2  13  351.56   27.30
 -16  -2  13  302.17   73.39
  16  -2 -13  596.64   90.39
  16  -2 -13  356.36   31.30
 -16  -2  13  388.96   30.90
 -16  -2  13  307.37   27.40
 -14   2  11   79.59    6.90
 -14   2  11   95.59    6.60
 -14   2  11   85.89   45.30
  14   2 -11   59.79   10.40
 -14   2  11   87.89   12.10
  14   2 -11  104.89   44.90
  14  -2 -11  169.78   53.69
 -14  -2  11   81.69   11.00
 -14  -2  11   75.69   42.80
  14  -2 -11   80.19   12.00
 -14  -2  11   73.89    7.00
 -12   2   9  492.15   65.89
 -12   2   9  545.25   45.30
 -12   2   9  572.84   45.20
  12   2  -9  682.63   66.39
 -12   2   9  612.04   46.80
  12   2  -9  549.85   46.30
 -12  -2   9  618.84   46.40
  12  -2  -9  695.43   79.39
 -12  -2   9  585.04   45.30
  12  -2  -9  578.24   46.70
 -12  -2   9  464.55   62.79
  10   2  -7  340.07   38.40
 -10   2   7  302.17   25.20
  10   2  -7  304.47   24.90
 -10   2   7  284.37   41.30
  10  -2  -7  299.87   25.30
  10  -2  -7  333.97   45.70
 -10  -2   7  308.37   24.10
  -8   2   5  243.28   19.30
   8   2  -5  227.98   19.90
   8   2  -5  313.27   29.00
  -8   2   5  257.27   20.20
  -8   2   5  197.18   31.00
   8  -2  -5  245.98   20.20
  -8  -2   5  258.07   19.40
  -8  -2   5  189.18   27.80
  -8  -2   5  254.77   19.90
   6   2  -3 4092.69  291.07
  -6   2   3 3350.26  294.77
  -6   2   3 3686.93  291.57
   6   2  -3 4003.70  293.67
   6  -2  -3 3321.77  291.57
  -6  -2   3 3410.86  293.37
   6  -2  -3 4279.87  297.87
  -4   2   1 3243.68  265.17
   4   2  -1 3684.63  265.17
   4   2  -1 3087.49  266.87
   4  -2  -1 3085.19  265.47
  -4  -2   1 2966.70  266.67
   4  -2  -1 3642.84  268.57
   4  -2  -1 3514.45  265.17
  -4  -2   1 3950.40  265.17
   2   2   1  216.38   24.80
   2   2   1  275.37   20.70
  -2   2  -1  241.98   26.40
  -2   2  -1  248.78   20.70
   2   2   1  277.77   21.00
  -2   2  -1  241.88   26.40
   2  -2   1  253.27   21.20
   2  -2   1  263.57   21.20
   2  -2   1  279.37   20.70
  -2  -2  -1  262.07   25.30
  -2  -2  -1  306.67   20.70
  -2  -2  -1  261.17   21.00
   0   2  -3  944.21   69.19
   0   2   3  804.02   67.29
   0   2  -3  756.42   62.69
   0   2   3  777.62   62.69
   0   2   3  788.42   62.29
   0  -2   3  808.52   62.29
   0  -2  -3  794.32   62.19
   0  -2   3  774.42   62.29
   0  -2   3  757.62   68.29
   0  -2   3  831.92   62.79
   0  -2  -3  761.42   62.69
   0  -2  -3  812.42   69.59
  -2   2   5  599.24   42.50
  -2   2   5  515.45   51.29
  -2   2   5  553.14   43.20
   2   2  -5  532.55   53.09
   2   2  -5  497.45   43.00
  -2   2   5  523.95   42.50
  -2  -2   5  541.75   42.50
  -2  -2   5  498.95   53.19
   2  -2  -5  533.75   43.10
  -2  -2   5  548.25   42.50
   2  -2  -5  601.74   52.69
   2  -2  -5  545.25   42.50
  -2  -2   5  560.04   43.20
   4   2  -7 1112.89  100.39
  -4   2   7 1412.76   99.69
  -4   2   7 1272.27  100.59
  -4   2   7 1408.66  110.79
  -4   2   7 1279.77   99.69
   4   2  -7 1522.65  112.39
   4  -2  -7 1135.89  100.39
  -4  -2   7 1246.28   99.69
   4  -2  -7 1297.37  111.39
  -4  -2   7 1258.77   99.79
  -4  -2   7 1283.47  100.59
  -4  -2   7 1192.88  111.29
  -6   2   9  954.70   71.59
   6   2  -9  869.41   91.99
  -6   2   9  992.20   73.29
  -6   2   9  950.70   90.29
  -6   2   9  934.51   71.59
   6  -2  -9  981.20   94.49
  -6  -2   9  822.12   91.09
  -6  -2   9  889.71   71.59
  -6  -2   9  887.21   71.59
   6  -2  -9  855.81   72.69
  -6  -2   9  917.41   72.79
   8   2 -11  462.05   43.40
  -8   2  11  471.05   79.99
  -8   2  11  537.45   41.90
  -8   2  11  566.44   41.90
   8   2 -11  621.24   83.99
  -8   2  11  550.44   44.30
  -8  -2  11  599.04   41.90
   8  -2 -11  533.15   46.50
  -8  -2  11  523.15   44.00
  -8  -2  11  500.05   42.00
 -10   2  13  407.06   33.20
 -10   2  13  384.86   28.00
  10   2 -13  304.17   31.00
  10   2 -13  417.86   78.39
 -10   2  13  335.97   77.69
 -10   2  13  350.16   28.00
 -10  -2  13  358.96   28.00
 -10  -2  13  351.46   31.80
 -10  -2  13  331.77   28.10
  10  -2 -13  380.66   87.29
 -12   2  15   74.69    6.70
 -12   2  15  -10.90   94.79
 -12   2  15   82.19    6.60
 -12   2  15   85.89   17.00
 -12  -2  15   72.49    6.90
  12  -2 -15   74.99   14.40
 -12  -2  15   84.69   16.80
 -12  -2  15   67.49    6.60
  12  -2 -15   35.20  106.79
 -14   2  17   36.50    5.20
 -14   2  17   42.70    4.90
 -14  -2  17   41.80    5.30
 -16   2  19    6.90    3.50
 -16  -2  19    9.40    3.60
 -18  -2  21   67.99    9.90
 -23   3  20    6.40    4.50
 -23  -3  20    0.00    4.30
 -21   3  18   34.20    5.30
 -21  -3  18   33.40    4.90
 -19   3  16   73.19    7.00
 -19  -3  16   74.59    9.00
 -17   3  14   65.29    4.90
 -17   3  14   77.39   14.40
 -17   3  14   55.49    5.60
  17   3 -14   50.99   11.00
 -17   3  14   14.20   82.19
  17  -3 -14   47.40   12.50
  17  -3 -14   62.99   97.69
 -17  -3  14   58.39   11.40
 -17  -3  14   45.80    5.60
  15   3 -12    2.30   52.39
 -15   3  12   14.80    2.10
  15   3 -12   13.80    6.40
 -15   3  12   14.70    2.00
 -15   3  12   22.60    8.90
 -15   3  12    1.00   51.89
 -15  -3  12   47.50   52.69
 -15  -3  12   11.80    2.20
  15  -3 -12    9.50    8.30
  15  -3 -12   10.70   64.09
 -13   3  10  176.48   14.40
 -13   3  10  116.19   42.20
 -13   3  10  178.68   14.20
  13   3 -10  165.28   41.20
 -13   3  10  217.28   17.90
  13   3 -10  160.48   16.20
 -13  -3  10  148.89   40.60
 -13  -3  10  173.68   14.50
 -13  -3  10  191.58   16.40
  13  -3 -10  282.97   53.19
  13  -3 -10  184.08   17.60
 -11   3   8  410.26   32.90
  11   3  -8  414.06   33.80
 -11   3   8  384.46   53.49
  11   3  -8  495.75   48.70
 -11   3   8  404.16   32.80
 -11   3   8  429.96   34.30
 -11  -3   8  427.96   33.80
  11  -3  -8  394.06   34.30
 -11  -3   8  411.36   33.00
 -11  -3   8  451.45   51.59
  11  -3  -8  528.35   60.49
   9   3  -6   17.20    3.10
  -9   3   6   10.20   20.80
   9   3  -6   19.60   15.10
  -9   3   6   20.70    1.90
  -9   3   6   19.70    3.80
   9  -3  -6   23.90    4.10
  -9  -3   6   41.20   19.00
  -9  -3   6   19.10    3.10
  -9  -3   6   17.40    2.10
   9  -3  -6   25.90   24.40
  -7   3   4  273.17   36.20
   7   3  -4  347.47   27.90
   7   3  -4  371.26   27.50
  -7   3   4  346.67   28.30
  -7   3   4  338.57   27.60
   7   3  -4  427.36   33.20
  -7  -3   4  375.36   27.70
  -7  -3   4  328.87   27.90
   7  -3  -4  360.96   28.40
  -7  -3   4  335.07   33.00
   5   3  -2  250.17   22.20
   5   3  -2  262.77   19.20
  -5   3   2  250.07   19.30
  -5   3   2  231.68   19.80
   5   3  -2  240.18   19.40
  -5   3   2  286.27   27.60
  -5  -3   2  228.08   22.10
   5  -3  -2  249.48   27.20
  -5  -3   2  209.78   19.50
   5  -3  -2  251.27   19.90
  -5  -3   2  261.17   19.30
   3   3   0 1206.08   90.39
  -3   3   0 1085.99   90.39
   3   3   0 1207.98   90.49
  -3   3   0 1158.58   90.79
  -3   3   0 1066.99   94.09
   3  -3   0 1139.19   90.79
  -3  -3   0 1118.39   92.39
   3  -3   0 1118.49   94.89
   3  -3   0 1262.37   90.39
  -3  -3   0 1175.38   90.39
  -1   3  -2   11.40    1.10
  -1   3  -2   10.70   11.10
   1   3   2   11.40    1.00
   1   3   2   14.50    2.10
   1   3   2   12.70    1.10
  -1   3  -2   28.70   12.60
   1   3   2   14.00    1.10
   1   3   2   18.40   10.20
   1  -3   2   13.90    2.60
   1  -3   2   12.00    1.20
  -1  -3  -2   17.80   10.70
  -1   3   4  142.09   11.90
  -1   3   4  141.39   11.20
   1   3  -4  157.88   26.70
   1   3  -4  128.09   11.80
  -1   3   4  128.79   24.30
   1  -3  -4  153.38   11.10
  -1  -3   4  129.99   23.20
  -1  -3   4  148.99   11.20
  -1  -3   4  138.69   11.20
   1  -3  -4  141.69   11.90
   3   3  -6    0.80    2.60
   3   3  -6    6.50   24.10
  -3   3   6    4.80   17.70
  -3   3   6    1.80    0.60
  -3   3   6    0.40    2.70
   3  -3  -6    4.80    2.70
  -3  -3   6    4.40   23.20
  -3  -3   6    2.80    0.70
   3  -3  -6    0.60   24.10
  -3  -3   6    1.60    2.80
  -3  -3   6    1.50    0.80
   5   3  -8  239.98   22.00
   5   3  -8  318.17   49.50
  -5   3   8  290.17   20.80
  -5   3   8  224.08   38.20
  -5   3   8  289.67   22.60
   5  -3  -8  285.77   51.09
  -5  -3   8  267.87   20.90
  -5  -3   8  255.07   20.90
  -5  -3   8  232.58   43.00
   5  -3  -8  232.78   22.10
  -5  -3   8  284.67   22.30
  -7   3  10   71.69    5.90
   7   3 -10   29.40   41.70
  -7   3  10   31.50   36.70
   7   3 -10   59.59    9.20
  -7   3  10   72.49    5.90
  -7   3  10   85.29   10.70
  -7  -3  10   59.19   43.00
  -7  -3  10   72.69   10.00
  -7  -3  10   77.39    6.10
  -7  -3  10   64.19    6.00
   7  -3 -10   67.79   47.40
   7  -3 -10   88.19    9.50
  -9   3  12   27.40   55.39
   9   3 -12   34.20   13.40
  -9   3  12   57.89   10.40
  -9   3  12   43.20    3.70
  -9   3  12   46.20    3.90
  -9  -3  12   12.20   58.29
  -9  -3  12   34.80    4.00
  -9  -3  12   38.50    4.00
  -9  -3  12   29.90    8.70
   9  -3 -12  114.99   67.59
   9  -3 -12   34.50    8.70
 -11   3  14   18.90    2.50
 -11   3  14    9.50   81.29
  11   3 -14    9.80    9.10
 -11   3  14   21.20    2.80
 -11   3  14   29.70   13.20
 -11  -3  14   16.10   11.00
  11  -3 -14   22.60   10.90
  11  -3 -14  180.58   97.89
 -11  -3  14   15.10    2.70
 -11  -3  14   20.60    2.80
 -13   3  16   89.09   21.20
 -13   3  16   16.00  114.79
 -13   3  16   87.39    8.40
 -13   3  16   90.49    8.30
  13  -3 -16   84.39   19.10
 -13  -3  16  109.69    8.20
 -13  -3  16   99.09    8.70
 -15   3  18   25.40    3.50
 -15   3  18   14.90    3.70
 -15  -3  18   28.50    3.90
 -17   3  20    1.40    4.00
 -17  -3  20    1.10    4.10
 -24   4  21   46.90    6.70
 -22   4  19    6.60    3.70
 -22  -4  19    1.70    4.00
 -20   4  17   23.70    3.60
 -20  -4  17   14.90    3.70
 -18   4  15   23.30   18.50
 -18   4  15    5.00    1.70
 -18   4  15    5.00    2.30
 -18  -4  15    8.90    2.70
  18  -4 -15  -58.99  132.69
  18  -4 -15   -6.90   13.40
 -16   4  13   40.10    4.30
 -16   4  13   42.20    3.70
  16   4 -13   40.60    8.70
 -16   4  13    8.60   68.69
 -16  -4  13   27.00    9.30
 -16  -4  13   43.60    4.70
  16  -4 -13   96.79   84.09
  16  -4 -13   47.90   11.00
  14   4 -11  773.12   88.79
 -14   4  11  677.73   92.59
 -14   4  11  721.53   56.19
  14  -4 -11  669.73   58.19
 -14  -4  11  761.72   57.69
 -14  -4  11  692.73   90.09
 -12   4   9  605.64   50.39
 -12   4   9  641.84   73.49
  12   4  -9  599.94   51.39
 -12   4   9  620.34   50.49
 -12   4   9  739.93   52.39
  12   4  -9  752.52   68.49
 -12  -4   9  627.24   50.59
 -12  -4   9  603.54   70.99
 -12  -4   9  661.13   51.49
 -10   4   7    1.70    0.80
  10   4  -7  -15.90   17.30
  10   4  -7    1.30    2.50
 -10   4   7   11.50   25.60
 -10  -4   7   13.90   18.90
 -10  -4   7    0.10    1.00
  10  -4  -7  -13.40   27.80
  10  -4  -7   -4.50    3.70
  -8   4   5 1065.39   82.69
  -8   4   5 1130.09   83.49
   8   4  -5 1034.40   82.99
  -8   4   5 1071.29   91.39
   8   4  -5 1136.69   82.59
   8   4  -5 1008.80   88.49
   8  -4  -5 1044.20   83.49
  -8  -4   5 1033.90   82.99
  -8  -4   5  979.80   87.29
  -8  -4   5 1057.59   82.69
  -6   4   3  130.19   10.30
   6   4  -3  130.59   10.50
  -6   4   3  129.39   23.80
   6   4  -3  133.69   15.20
   6   4  -3  135.59   10.20
  -6   4   3  129.79   11.10
  -6  -4   3  127.59   10.50
  -6  -4   3  121.49   15.50
  -6  -4   3  128.79   10.30
   6  -4  -3  153.08   25.10
   6  -4  -3  128.09   11.20
   4   4  -1   86.49    7.70
   4   4  -1   96.79    7.70
  -4   4   1  101.09    8.40
  -4   4   1   95.19    7.70
  -4   4   1  101.29   16.50
   4   4  -1  103.19    7.80
  -4  -4   1  109.39    7.70
  -4  -4   1   92.39   11.20
  -4  -4   1   94.79   10.20
   4  -4  -1   92.19    8.50
   2   4   1 1313.97  113.59
   2   4   1 1641.84  113.39
  -2   4  -1 1435.06  113.49
  -2   4  -1 1403.06  117.69
   2   4   1 1393.76  115.99
   2  -4   1 1445.66  113.49
  -2  -4  -1 1514.25  116.19
   2  -4   1 1368.96  113.89
  -2  -4  -1 1607.54  113.49
  -2  -4  -1 1403.86  113.59
   0   4   3 1063.09   87.79
   0   4   3  956.80   83.09
   0   4   3 1108.69   83.09
   0   4   3 1145.39   83.59
   0   4  -3 1008.40   83.09
   0   4  -3 1079.29   89.99
   0   4   3 1055.29   83.09
   0  -4  -3 1070.59   83.09
   0  -4   3 1103.09   83.89
   0  -4   3  987.90   83.09
   0  -4   3 1054.69   83.19
   0  -4  -3 1240.28   88.89
   0  -4  -3 1012.60   83.49
   2   4  -5 1875.81  158.88
   2   4  -5 2204.88  166.38
  -2   4   5 1970.50  158.38
  -2   4   5 2211.98  159.38
  -2   4   5 2088.59  158.38
  -2   4   5 1934.21  164.18
  -2  -4   5 2081.49  158.38
   2  -4  -5 1849.71  158.88
   2  -4  -5 1945.71  158.38
  -2  -4   5 2154.28  159.08
  -4   4   7  728.03   55.69
  -4   4   7  770.12   56.69
   4   4  -7  887.31   71.59
   4   4  -7  666.03   56.39
  -4   4   7  728.73   70.09
  -4  -4   7  624.54   55.69
   4  -4  -7  711.73   57.29
  -4  -4   7  638.14   72.79
  -4  -4   7  718.53   55.69
  -6   4   9    7.10    1.00
  -6   4   9   26.60   32.30
  -6   4   9   11.80    5.60
  -6   4   9    3.70    0.90
   6   4  -9   -0.70    3.80
   6   4  -9  -19.70   34.50
  -6  -4   9   24.30   39.70
   6  -4  -9    3.90    4.10
  -6  -4   9    5.40    1.30
  -6  -4   9    0.80    4.50
   6  -4  -9  -13.50   38.40
  -6  -4   9    3.60    1.10
  -8   4  11   61.29    4.90
  -8   4  11   56.69    4.90
  -8   4  11   67.49   12.40
   8   4 -11   51.49    9.50
   8   4 -11  167.08   86.49
  -8   4  11   -6.50   46.80
  -8  -4  11  124.19   56.19
   8  -4 -11  137.49   61.89
  -8  -4  11   53.19    5.10
   8  -4 -11   50.79    9.30
  -8  -4  11   62.19   10.40
 -10   4  13  299.57   23.90
 -10   4  13  303.17   23.90
 -10   4  13  334.17   29.40
  10   4 -13  278.47   27.30
 -10   4  13  263.07   78.09
 -10  -4  13  330.27   23.90
  10  -4 -13  388.26   89.79
 -10  -4  13  313.07   28.50
 -10  -4  13  275.47   24.00
  10  -4 -13  290.97   28.10
 -12   4  15   14.90    2.60
 -12   4  15  137.89  102.99
 -12   4  15   19.10   16.00
 -12   4  15   13.70    2.30
  12  -4 -15    4.10   13.70
 -12  -4  15   17.20    2.90
 -12  -4  15   17.10    2.30
  12  -4 -15  -18.70  122.69
 -14   4  17  152.38   12.40
 -14   4  17  145.19   12.50
 -16  -4  19   63.09    7.70
 -18  -4  21   10.60    5.10
 -23   5  20    2.10    4.70
 -23  -5  20   -5.50    4.90
 -21   5  18   41.70    6.30
 -21  -5  18   49.50    7.30
 -19   5  16   31.10    4.70
 -19   5  16   40.90    4.10
 -19  -5  16   33.50    4.50
 -17   5  14   87.89    8.40
 -17   5  14   28.40   91.49
 -17   5  14  104.99    8.00
 -17   5  14  103.09   20.90
  17  -5 -14  103.09   19.40
 -17  -5  14   95.59    8.80
  17  -5 -14   30.30  120.99
 -15   5  12  343.77   25.40
 -15   5  12  317.67   25.60
  15   5 -12  317.27   28.00
 -15  -5  12  298.57   25.80
  15  -5 -12  508.15   94.29
 -15  -5  12  320.47   28.20
  15  -5 -12  338.77   29.90
 -13   5  10   21.20    2.40
  13   5 -10   17.60    4.80
 -13   5  10   16.60    1.80
 -13   5  10   24.50   44.90
 -13   5  10   16.90    7.30
  13   5 -10   29.00   34.50
  13  -5 -10   14.50    7.10
 -13  -5  10  -12.60   36.90
 -13  -5  10   13.10    2.30
  13  -5 -10   51.69   56.39
 -13  -5  10   14.70    5.00
  11   5  -8 1083.59   85.09
 -11   5   8 1066.49   75.39
 -11   5   8  867.71   90.89
  11   5  -8  926.81   74.49
 -11   5   8  905.61   73.89
 -11  -5   8  969.90   74.49
 -11  -5   8  827.62   86.59
  11  -5  -8  926.41   75.19
 -11  -5   8  901.11   73.99
  -9   5   6 1225.08   97.69
  -9   5   6 1081.89  107.49
  -9   5   6 1320.47   98.89
   9   5  -6 1196.68   97.99
   9   5  -6 1439.06  103.49
  -9  -5   6 1258.07   98.09
  -9  -5   6 1174.98   97.79
  -9  -5   6 1310.07  104.49
   9  -5  -6 1577.74  139.19
   9  -5  -6 1141.49   98.59
   7   5  -4    9.50    2.00
  -7   5   4    6.60    1.20
   7   5  -4   19.00   10.10
  -7   5   4    5.80    2.80
  -7   5   4   10.90   18.70
   7  -5  -4    7.90   21.20
  -7  -5   4   14.10   10.30
   7  -5  -4   10.00    3.20
  -5   5   2   42.60    4.90
   5   5  -2   43.70    3.50
  -5   5   2   37.30    3.60
  -5   5   2   18.70   15.80
   5  -5  -2   37.80    5.00
  -5  -5   2   41.50    3.60
  -3   5   0  599.74   46.10
   3   5   0  557.34   45.60
   3   5   0  591.74   45.50
  -3   5   0  575.24   45.60
  -3   5   0  549.15   51.89
   3  -5   0  568.34   46.10
   3  -5   0  582.24   54.09
  -3  -5   0  587.84   47.00
  -3  -5   0  622.94   45.60
   1   5   2  765.52   55.79
   1   5   2  715.43   55.69
  -1   5  -2  697.93   62.29
   1   5   2  703.53   60.29
  -1   5  -2  814.62   64.29
  -1   5  -2  661.63   55.79
   1   5   2  719.23   56.09
   1  -5   2  742.93   55.79
  -1  -5  -2  726.93   56.09
   1  -5   2  630.54   56.29
   1  -5   2  705.13   55.79
   1  -5   2  745.03   56.39
  -1  -5  -2  663.73   60.09
  -1   5   4 3724.43  253.37
  -1  -5   4 3150.88  253.47
  -1  -5   4 3367.96  254.07
   1  -5  -4 3080.39  258.57
   1  -5  -4 2899.41  253.77
  -3   5   6   79.19    6.60
   3   5  -6   95.29   27.10
   3   5  -6   84.19    8.20
  -3   5   6   92.09   24.40
  -3   5   6   81.59    8.30
  -3   5   6   80.09    6.50
  -3  -5   6   90.89    6.80
   3  -5  -6   69.49    8.00
  -3  -5   6   85.99    8.50
  -3  -5   6   90.49   31.00
  -5   5   8  372.56   27.10
   5   5  -8  306.57   55.39
  -5   5   8  332.37   25.20
  -5   5   8  310.67   25.20
  -5   5   8  327.37   52.29
   5   5  -8  279.27   26.40
  -5  -5   8  339.17   51.69
   5  -5  -8  306.57   26.60
  -5  -5   8  316.67   26.70
  -5  -5   8  335.27   25.30
  -5  -5   8  318.37   25.20
  -7   5  10   -0.70    1.10
  -7   5  10   10.40   40.90
   7   5 -10    2.10    5.10
  -7   5  10    8.10    6.70
  -7   5  10    0.10    0.90
   7  -5 -10    7.70   49.50
  -7  -5  10   -0.50    1.40
  -7  -5  10    2.00    4.90
  -7  -5  10    2.90    1.10
  -7  -5  10  -15.80   50.69
   7  -5 -10   -3.00    5.00
   9   5 -12   17.90    7.10
  -9   5  12  -64.29   54.49
   9  -5 -12  -24.50   72.49
   9  -5 -12    9.60    7.20
 -11   5  14  503.65   42.10
 -11   5  14  412.66   96.49
 -11   5  14  481.75   35.00
  11   5 -14  364.96   38.90
 -11   5  14  461.25   35.00
  11  -5 -14  444.96   40.40
 -11  -5  14  446.36   34.90
  11  -5 -14  606.04  163.28
 -11  -5  14  422.76   40.50
 -11  -5  14  425.96   35.20
 -13   5  16  193.08   15.40
 -13   5  16  201.58   15.30
 -13  -5  16  169.18   15.50
 -15   5  18   32.70    4.40
 -15   5  18   36.50    5.20
 -15  -5  18   32.30    4.80
 -22   6  19   29.40    4.80
 -22  -6  19   20.50    5.30
 -20   6  17   48.70    6.40
 -20  -6  17   61.89    7.20
 -18   6  15   58.89    6.30
 -18   6  15   64.99    5.50
 -18  -6  15   58.29    7.00
 -16   6  13   45.10    4.90
 -16   6  13   52.49    4.50
 -16   6  13   78.19   78.39
 -16   6  13   79.69   14.20
  16   6 -13   63.59   10.40
  16  -6 -13   41.90   13.00
  16  -6 -13   12.60  103.59
 -16  -6  13   55.09   10.00
 -16  -6  13   50.09    5.70
 -14   6  11   86.39   60.79
  14   6 -11  150.28   16.10
 -14   6  11  158.58   13.00
 -14   6  11  174.28   12.80
  14  -6 -11  150.88   17.90
 -14  -6  11  151.78   13.30
 -14  -6  11  178.58   16.20
  14  -6 -11  260.87   78.89
  12   6  -9  659.33   56.09
 -12   6   9  683.53   55.19
 -12   6   9  687.23   83.49
 -12   6   9  692.33   55.19
  12   6  -9  815.72   55.09
 -12  -6   9  598.04   78.09
 -12  -6   9  713.03   56.09
  12  -6  -9  710.53   57.09
  10   6  -7  244.48   34.40
  10   6  -7  241.88   19.70
 -10   6   7  189.28   40.00
 -10   6   7  234.78   18.90
 -10   6   7  273.87   21.10
  10  -6  -7  207.28   20.80
 -10  -6   7  245.58   19.60
  10  -6  -7  293.57   55.19
 -10  -6   7  239.28   19.10
 -10  -6   7  251.47   41.20
  -8   6   5   74.99   25.20
  -8   6   5   49.60    7.20
   8   6  -5   57.89   12.20
   8   6  -5   62.79    5.60
  -8   6   5   63.29    5.00
  -8  -6   5   63.39    5.40
  -8  -6   5   60.79    5.20
  -8  -6   5   45.70   16.50
   8  -6  -5   72.09   29.50
   8  -6  -5   56.79    7.50
  -6   6   3    6.90   18.20
   6  -6  -3   10.30    3.30
  -4   6   1  103.09   20.00
   4   6  -1  106.99    8.10
  -4   6   1   89.79    8.10
  -4   6   1  104.19    9.40
   4  -6  -1   95.49    9.20
   4  -6  -1  107.09   22.60
  -4  -6   1  112.69    8.20
   2   6   1  837.52   64.19
  -2   6  -1  742.83   70.89
  -2   6  -1  826.22   64.19
   2   6   1  859.31   64.39
   2   6   1  771.62   64.19
   2   6   1  821.92   67.29
   2  -6   1  784.82   64.79
  -2  -6  -1  898.31   67.39
  -2  -6  -1  758.62   64.39
  -2  -6  -1  907.41   64.19
   0   6  -3  407.46   39.90
   0   6   3  304.17   24.00
   0   6   3  311.37   34.10
   0   6   3  297.47   24.50
   0   6  -3  283.77   39.40
   0   6   3  302.47   24.10
   0   6  -3  292.67   24.00
   0  -6   3  266.27   24.80
   0  -6  -3  313.57   24.60
   0  -6   3  327.77   24.90
   0  -6  -3  394.06   35.80
   0  -6   3  303.37   24.10
  -2   6   5  155.28   11.90
   2   6  -5  153.28   11.90
  -2   6   5  123.69   25.40
   2   6  -5  208.28   31.30
  -2   6   5  143.39   11.90
  -2   6   5  144.69   13.10
   2  -6  -5  156.98   12.90
   2  -6  -5  196.88   30.60
  -2  -6   5  143.49   13.20
  -4   6   7  986.10   96.49
  -4   6   7 1056.09   84.29
  -4   6   7 1130.39   84.29
  -4   6   7 1192.08   85.39
   4   6  -7 1251.87  100.09
   4   6  -7 1049.59   85.09
  -4  -6   7 1041.60   84.29
   4  -6  -7 1010.50   85.19
  -4  -6   7 1080.79   84.39
  -4  -6   7 1127.59   85.29
  -4  -6   7  898.81  102.59
  -6   6   9  133.89   40.60
   6   6  -9   75.19   10.40
  -6   6   9   94.89    7.60
  -6   6   9  102.19   12.30
  -6   6   9   91.59    7.60
  -6  -6   9  108.89   11.30
  -6  -6   9   99.99    7.70
  -6  -6   9    9.00   47.00
   6  -6  -9   87.19   10.80
  -6  -6   9   98.59    7.90
   6  -6  -9   10.70   63.29
  -8   6  11    6.90    1.50
  -8   6  11   10.00    1.40
   8   6 -11    4.40    6.00
  -8   6  11   12.40   51.39
  -8   6  11   13.70    8.40
   8  -6 -11  -36.90   62.19
  -8  -6  11    3.80    6.60
  -8  -6  11    8.40    1.50
  -8  -6  11    6.00    1.90
   8  -6 -11    9.70    6.60
  -8  -6  11    7.10   80.49
  10   6 -13   46.90   10.00
 -10   6  13   80.69   77.49
 -10   6  13   42.20    4.10
 -10   6  13   36.10    3.90
 -10  -6  13   36.60   10.50
 -10  -6  13   42.30    4.60
 -10  -6  13   39.70    3.90
  10  -6 -13    3.40   96.19
 -12   6  15   16.60    2.50
 -12   6  15   11.60    2.30
 -12  -6  15    6.60    2.90
 -12  -6  15   12.20    2.30
 -14   6  17  188.78   14.80
 -14   6  17  186.28   15.00
 -14  -6  17  164.08   15.10
 -16   6  19    5.80    4.90
 -16   6  19    7.30    4.10
 -16  -6  19    5.50    4.10
 -23   7  20   18.90    5.10
 -21   7  18   53.29    7.00
 -21  -7  18   47.00    7.10
 -19   7  16    9.40    3.00
 -19   7  16    9.70    2.40
 -19  -7  16    6.60    3.70
 -17   7  14  225.18   16.90
 -17   7  14  193.88   17.10
 -17  -7  14  216.88   17.60
 -15   7  12   -4.70   75.89
 -15   7  12   64.59    5.00
  15   7 -12   38.70    8.80
 -15   7  12   60.89    5.30
  15  -7 -12   46.70   12.10
 -15  -7  12   49.80    6.00
 -15  -7  12   71.99   12.00
  15  -7 -12   92.19  100.39
 -13   7  10    0.40    1.00
 -13   7  10    2.50    8.20
 -13   7  10    4.20    1.40
 -13   7  10   23.10   51.19
  13   7 -10   -3.40    4.90
 -13  -7  10    2.70    2.10
  13  -7 -10   39.70   71.09
  13  -7 -10   -1.30   10.00
 -13  -7  10   -1.90    4.80
 -11   7   8   23.10    2.90
 -11   7   8   38.40   37.50
  11   7  -8   32.10   23.50
 -11   7   8   26.50    6.80
 -11  -7   8   28.60    5.30
 -11  -7   8   35.10    3.40
  11  -7  -8   51.09   49.90
  11  -7  -8   21.40    6.70
 -11  -7   8   31.10   33.10
   9   7  -6    3.90    2.30
   9   7  -6    5.20   13.10
  -9   7   6   -2.80   28.70
  -9   7   6    5.30    1.10
  -9   7   6    2.90    4.40
  -9  -7   6    1.30    1.80
  -9  -7   6    1.40   20.60
  -9  -7   6    3.00    1.40
   9  -7  -6    2.10    4.30
   9  -7  -6   30.00   35.70
  -7   7   4 1754.32  130.79
  -7   7   4 1574.54  138.59
  -7   7   4 1624.44  129.89
  -7  -7   4 1675.43  129.99
   7  -7  -4 1672.93  130.79
  -5   7   2    0.50    2.50
  -5   7   2    2.40    0.70
  -5  -7   2    1.10    0.90
   5  -7  -2    2.90    2.90
   5  -7  -2   10.70   21.10
  -3   7   0  514.55   41.50
   3   7   0  469.95   41.50
  -3   7   0  571.24   42.20
  -3  -7   0  545.45   41.50
   3  -7   0  522.85   42.20
   3  -7   0  606.94   55.79
   1   7   2  399.06   38.00
  -1   7  -2  388.16   30.20
   1   7   2  408.96   30.60
  -1   7  -2  371.16   41.70
   1   7   2  397.16   30.20
   1   7   2  356.46   30.10
  -1   7  -2  488.45   46.20
   1  -7   2  406.76   31.10
  -1  -7  -2  372.96   30.50
   1  -7   2  384.36   30.30
  -1  -7  -2  361.16   38.10
   1  -7   2  348.37   30.90
  -1   7   4  650.23   46.40
  -1   7   4  538.75   45.60
  -1   7   4  513.85   56.09
   1   7  -4  639.24   58.99
  -1   7   4  579.84   45.70
   1   7  -4  553.04   45.70
   1  -7  -4  550.24   46.30
  -1  -7   4  602.74   46.50
  -1  -7   4  574.64   45.80
   1  -7  -4  713.33   59.59
   3   7  -6 1096.09   88.69
  -3   7   6 1181.58   89.59
  -3   7   6 1124.79  100.99
  -3   7   6 1255.97   88.59
  -3   7   6 1079.29   88.59
   3  -7  -6 1207.08  104.29
  -3  -7   6 1139.59   88.69
  -3  -7   6 1169.48   89.49
  -3  -7   6 1120.49   88.79
   3  -7  -6  998.80   89.29
   5   7  -8  110.69   37.90
  -5   7   8   57.29   35.40
  -5   7   8  111.29   11.10
  -5   7   8   90.39    7.20
   5   7  -8   83.79   10.10
  -5  -7   8   84.99    7.50
  -5  -7   8   88.29    7.30
  -5  -7   8   95.89   10.50
   5  -7  -8   77.59   10.10
  -7   7  10   45.00    4.00
   7   7 -10   43.80    7.70
  -7   7  10   73.69   12.50
  -7   7  10   56.29   49.10
  -7   7  10   51.49    4.90
  -7  -7  10   51.79    9.80
  -7  -7  10   35.70    4.50
  -7  -7  10   50.99    4.10
   7  -7 -10   30.80    7.80
   7  -7 -10   75.99   64.99
  -9   7  12  664.53   52.39
  -9   7  12  568.04  107.09
   9   7 -12  612.94   54.49
  -9   7  12  632.34   52.39
  -9  -7  12  764.52   52.39
  -9  -7  12  673.53   52.59
   9  -7 -12  736.63  134.79
 -11   7  14    4.80    1.90
 -11   7  14   11.00    2.20
 -11  -7  14    8.90    2.60
 -13   7  16    1.40    2.50
 -13   7  16   -0.80    2.20
 -13  -7  16   -0.90    3.10
 -15   7  18    5.60    4.00
 -15   7  18   -2.40    3.00
 -15  -7  18   -6.90    3.60
 -17  -7  20   12.20    5.10
 -22   8  19   53.19    8.20
 -20   8  17   69.79    7.60
 -18   8  15    0.40    1.90
 -18  -8  15    1.50    3.60
 -16   8  13  178.38   13.90
 -16   8  13  171.08   14.10
 -16  -8  13  168.38   14.60
 -14   8  11  204.38   16.30
  14   8 -11  234.08   19.60
 -14   8  11  203.88   16.10
 -14   8  11  225.58   75.09
  14  -8 -11  389.16   98.99
 -14  -8  11  193.38   18.80
 -14  -8  11  184.58   16.60
  12   8  -9    6.00    1.00
 -12   8   9   33.70   49.00
 -12   8   9    3.90    1.60
 -12   8   9    1.70    7.60
  12   8  -9    9.40    4.40
 -12  -8   9    5.60    3.70
 -12  -8   9    6.50    2.20
  12  -8  -9   -2.20   65.39
  12  -8  -9    8.40    8.00
  10   8  -7  561.84   38.40
 -10   8   7  486.15   65.89
 -10   8   7  481.25   38.00
 -10  -8   7  384.76   56.19
 -10  -8   7  455.95   38.10
  10  -8  -7  484.45   39.80
 -10  -8   7  466.65   38.10
  10  -8  -7  475.05   81.29
  -8   8   5    1.80   28.20
  -8   8   5    1.10    1.10
  -8   8   5    4.90    4.40
   8  -8  -5    3.00    4.30
  -8  -8   5   -0.10    1.40
   8  -8  -5  -13.80   34.00
  -6   8   3  452.95   32.90
  -6   8   3  397.06   31.80
  -6   8   3  462.45   49.20
   6  -8  -3  427.96   54.79
   6  -8  -3  349.37   32.80
  -6  -8   3  401.46   31.90
   4   8  -1 1330.17  112.49
  -4   8   1 1368.96  112.49
  -4   8   1 1483.25  113.19
  -4   8   1 1357.66  120.69
   4  -8  -1 1394.56  113.19
  -4  -8   1 1628.24  112.59
   4  -8  -1 1530.25  124.59
  -2   8  -1   16.90    1.90
   2   8   1   21.90    1.90
  -2   8  -1   37.80   20.50
   2   8   1   38.60   12.80
   2   8   1   17.90    2.70
  -2   8  -1   23.00   23.80
   2  -8   1   21.70    4.20
  -2  -8  -1   24.80    2.80
  -2  -8  -1   26.70   10.60
   2  -8   1   14.40    3.50
   0   8  -3   -1.70   20.60
   0   8   3    9.90    2.80
   0   8   3    7.90    1.30
   0   8   3   10.50    1.30
   0   8  -3   11.00    1.30
   0   8   3   15.90   18.80
   0   8  -3   22.20   25.60
   0  -8   3    9.20    1.40
   0  -8  -3   25.70   20.80
   0  -8   3    9.90    3.40
   0  -8  -3   10.70    2.70
   2   8  -5   36.80   29.40
  -2   8   5   25.10    2.20
  -2   8   5   10.00   25.90
  -2   8   5   24.60    2.20
   2   8  -5   20.90   27.50
   2   8  -5   21.60    2.30
  -2   8   5   35.80    5.70
   2  -8  -5   24.30    5.10
   2  -8  -5   28.80   30.90
  -2  -8   5   14.60    4.30
  -2  -8   5   20.60    2.70
  -2  -8   5   20.00    4.80
   4   8  -7  165.38   38.50
  -4   8   7  169.88   13.00
  -4   8   7  171.58   15.70
   4   8  -7  157.08   13.00
  -4   8   7   99.59   36.90
   4  -8  -7  143.19   14.90
  -4  -8   7  168.58   13.30
  -4  -8   7  177.58   15.30
   4  -8  -7  251.07   47.70
  -6   8   9  401.36   73.69
  -6   8   9  381.46   31.10
  -6   8   9  368.16   31.10
   6   8  -9  418.16   33.20
  -6   8   9  434.16   34.50
  -6  -8   9  405.66   31.40
  -6  -8   9  420.36   33.10
   6  -8  -9  359.46   33.10
   8   8 -11  167.48   18.20
  -8   8  11  163.08   13.60
  -8   8  11  180.58   13.60
  -8   8  11  143.89   63.99
   8  -8 -11  193.08   85.39
  -8  -8  11  166.28   14.00
  -8  -8  11  175.58   18.60
 -10   8  13    3.60    1.90
 -10   8  13    4.10    1.70
 -10  -8  13    2.10    2.60
 -12   8  15  274.17   21.70
 -12   8  15  285.67   21.80
 -12  -8  15  256.07   22.20
 -14   8  17    9.30    3.80
 -14   8  17    6.10    2.90
 -14  -8  17    3.90    3.80
 -16   8  19   53.09    6.70
 -16  -8  19   34.00    6.10
 -21   9  18    8.40    4.50
 -21  -9  18    2.80    5.20
 -19   9  16    8.80    3.40
 -19   9  16   17.80    2.90
 -19  -9  16    9.60    4.60
 -17   9  14  175.68   13.70
 -17   9  14  164.58   14.00
 -17  -9  14  167.28   14.90
  15   9 -12    9.80    8.60
 -15   9  12   11.40    1.80
 -15   9  12    9.60    2.20
 -15  -9  12    5.90    6.90
 -15  -9  12    8.10    3.30
  13   9 -10   41.70    6.70
 -13   9  10   36.40    3.90
 -13   9  10   30.30    3.60
 -13   9  10  -22.80   64.29
  13   9 -10   40.10    3.30
  13  -9 -10  -17.10   93.29
 -13  -9  10   49.60    7.60
 -11   9   8    7.90   46.20
 -11   9   8   43.80    4.00
 -11  -9   8   39.20    5.00
 -11  -9   8   15.50   33.10
  11  -9  -8   49.80   12.50
 -11  -9   8   36.20    4.70
  11  -9  -8  102.79   62.69
  -9   9   6  115.29    9.50
  -9   9   6  111.59   40.30
  -9   9   6  145.49   13.50
   9  -9  -6  121.29   13.30
  -9  -9   6  102.59    9.70
   9  -9  -6  172.88   49.60
  -7   9   4  372.26   54.69
  -7   9   4  453.95   34.20
  -7   9   4  414.26   32.10
  -7  -9   4  382.76   32.10
   7  -9  -4  393.76   33.50
   7  -9  -4  414.56   63.79
  -5   9   2   19.30    4.40
   5   9  -2   16.30    2.00
  -5   9   2   19.70    2.10
  -5   9   2   38.90   25.30
  -5  -9   2   22.40    2.30
   5  -9  -2   12.30    4.30
   5  -9  -2   23.10   31.20
   3   9   0  106.29    9.10
  -3   9   0  113.39    9.10
  -3   9   0   97.79   26.90
   3   9   0  122.79    9.10
  -3  -9   0  123.69    9.20
   3  -9   0  104.39   10.70
   3  -9   0   87.09   32.90
   1   9   2  467.25   38.30
  -1   9  -2  498.65   38.40
   1   9   2  504.05   38.30
   1   9   2  401.96   53.79
   1   9   2  535.95   38.70
  -1   9  -2  612.94   60.79
  -1   9  -2  510.15   52.49
  -1  -9  -2  430.06   47.20
  -1  -9  -2  466.35   38.60
   1  -9   2  452.05   39.20
   1  -9   2  523.55   39.40
  -1   9   4   64.69    5.20
   1   9  -4   74.99   39.70
  -1   9   4   66.09    5.30
   1   9  -4   57.19   27.50
   1   9  -4   62.99    5.30
  -1   9   4   52.89   26.50
   1  -9  -4   86.19   30.80
  -1  -9   4   69.69    8.10
   1  -9  -4   55.49    7.20
  -1  -9   4   62.69    8.00
  -1  -9   4   63.29    5.60
   3   9  -6  255.77   20.40
   3   9  -6  265.07   43.50
  -3   9   6  263.17   20.60
  -3   9   6  258.47   42.90
  -3   9   6  284.27   22.20
   3   9  -6  251.77   44.00
  -3  -9   6  215.48   22.30
  -3  -9   6  286.37   22.10
   3  -9  -6  304.27   52.29
  -3  -9   6  248.38   20.60
   3  -9  -6  249.58   21.80
   5   9  -8    1.80    1.10
  -5   9   8    2.50    1.10
  -5   9   8    3.90    1.10
  -5   9   8  -18.40   41.20
   5   9  -8    1.90   43.60
  -5  -9   8    6.40    5.60
  -5  -9   8    2.70    1.70
   5  -9  -8  -22.50   54.69
   7   9 -10    1.80    7.70
  -7   9  10   61.29   57.49
  -7   9  10   14.00    1.70
  -7   9  10   11.30    1.70
  -7  -9  10   12.80    2.40
   7  -9 -10  -18.50   76.09
  -7  -9  10   12.60    7.10
  -9   9  12  291.97   22.10
  -9   9  12  254.27   22.00
  -9  -9  12  291.07   22.50
 -11   9  14    1.30    2.30
 -11   9  14    0.10    1.90
 -11  -9  14    3.90    3.00
 -13   9  16    0.30    2.50
 -13  -9  16    0.10    3.70
 -15   9  18    2.50    3.30
 -15  -9  18    4.30    4.60
 -20  10  17    8.20    4.10
 -20 -10  17    3.10    5.20
 -18  10  15    2.40    2.30
 -18  10  15    0.20    3.00
 -18 -10  15    6.70    4.60
 -16  10  13   15.90    2.40
 -16  10  13   14.70    2.90
 -16 -10  13   17.90    4.30
 -14  10  11   48.50    5.10
 -14  10  11   52.69    4.90
  14  10 -11   65.09   10.40
 -14 -10  11   65.69   11.10
 -14 -10  11   50.39    6.40
 -12  10   9   11.60    2.10
  12  10  -9   14.40    2.00
 -12  10   9   81.49   63.69
 -12  10   9   13.90    1.80
 -12 -10   9    6.10    2.90
  12 -10  -9    7.90   84.19
 -10  10   7    2.90    1.50
 -10  10   7   25.60   46.00
  10 -10  -7  -11.10   60.09
 -10 -10   7   -2.20    2.10
  -8  10   5   32.70   65.69
   8 -10  -5   -1.60    6.60
  -8 -10   5   13.60    2.20
   8 -10  -5   10.50   49.40
  -6  10   3   94.09   11.10
   6  10  -3   90.89    8.10
  -6  10   3  106.79    8.20
  -6  10   3   70.29   33.50
  -6 -10   3  114.89    8.40
   6 -10  -3  153.98   45.40
   6 -10  -3   92.69   10.90
  -4  10   1  118.69   10.70
  -4  10   1   86.09   30.70
  -4  10   1   94.99    8.20
   4  10  -1  101.59    8.10
   4  10  -1   99.99    8.10
   4 -10  -1   80.19   10.20
   4 -10  -1  151.88   40.20
  -4 -10   1  108.49    8.30
  -2  10  -1   14.20   26.20
   2  10   1    6.80    1.20
  -2  10  -1   10.30   33.20
   2  10   1   11.00    1.50
  -2  10  -1    9.80    1.40
   2 -10   1    9.80    4.70
   2 -10   1   11.10    3.90
   0  10  -3   -9.60   33.90
   0  10   3   14.60   24.10
   0  10  -3    1.10    1.60
   0  10   3    8.10    3.20
   0 -10   3    2.20    3.80
   0 -10   3    4.10    4.40
   0 -10  -3    0.60   24.90
   0 -10  -3    4.70    2.90
   2  10  -5   10.20    1.40
  -2  10   5    9.80    1.30
  -2  10   5    6.50   33.30
   2  10  -5    0.30   53.49
  -2  10   5    7.10    1.30
  -2 -10   5    3.30    4.80
  -2 -10   5    7.20    1.80
   2 -10  -5   13.70   40.40
  -2 -10   5   10.20    4.80
   2 -10  -5    5.20    4.40
   4  10  -7   15.30    2.10
  -4  10   7    9.20    1.50
   4  10  -7   21.30   42.30
  -4  10   7   18.70   43.00
  -4  10   7   13.80    2.00
  -4 -10   7   11.10    2.30
  -4 -10   7    8.90    6.20
   4 -10  -7   74.69   56.39
   6  10  -9    6.50   59.89
   6  10  -9   30.70    3.40
  -6  10   9   34.00    3.30
  -6  10   9   45.80   58.09
  -6  10   9   30.50    3.20
  -6 -10   9   36.90    4.30
  -6 -10   9   31.80   10.80
   6 -10  -9  -47.80   75.39
   8  10 -11   26.30    3.00
  -8  10  11   24.00    3.10
  -8  10  11   22.60    2.90
  -8 -10  11   17.20    3.30
 -10  10  13    3.30    2.10
 -10 -10  13    3.90    3.10
 -12  10  15    2.40    2.40
 -12 -10  15    6.20    3.70
 -14  10  17   29.90    3.90
 -14 -10  17   16.00    5.00
 -16  10  19    3.40    4.20
 -21  11  18   14.60    5.90
 -19  11  16   29.50    3.90
 -19  11  16   26.10    4.40
 -19 -11  16   21.70    5.90
 -17  11  14  214.78   17.30
 -17  11  14  204.68   16.90
 -15  11  12    8.90    2.20
 -15  11  12   14.40    2.70
 -15 -11  12    4.40    3.90
  13  11 -10   20.70    2.40
 -13  11  10   13.10    2.10
 -13  11  10   15.40    2.60
 -13 -11  10   10.00    3.60
 -11  11   8  225.28   18.00
  11  11  -8  240.88   17.70
 -11 -11   8  204.78   18.30
  -9  11   6  183.88   15.30
  -9  11   6  179.68   53.79
  -9 -11   6  198.68   15.60
   9 -11  -6  232.48   70.89
  -7  11   4  530.45   76.09
   7  11  -4  550.34   45.90
  -7  11   4  611.34   46.00
   7 -11  -4  707.43   92.89
  -7 -11   4  591.74   46.10
  -5  11   2   -1.40    1.20
  -5  11   2   -7.70   33.00
   5  11  -2    0.80    1.10
   5  11  -2    1.20    1.00
   5 -11  -2  -10.60   48.30
  -5 -11   2    0.90    1.50
   3  11   0   16.10    2.10
  -3  11   0   33.00   46.70
  -3  11   0   21.40    2.30
   3  11   0   16.70    2.10
   3 -11   0   21.10    6.10
   1  11   2  484.15   37.20
  -1  11  -2  466.75   37.20
   1  11   2  504.95   37.20
   1  11   2  474.05   46.50
  -1  11  -2  467.45   59.39
   1 -11   2  509.65   40.50
  -1 -11  -2  437.26   37.40
  -1 -11  -2  427.96   48.70
   1  11  -4   73.29    6.60
   1  11  -4  108.79   33.00
  -1  11   4   73.49   34.20
  -1  11   4   87.79    6.60
  -1  11   4   79.99    6.60
   1 -11  -4  100.29   36.30
  -1 -11   4   80.39    7.00
  -1 -11   4   75.39   10.00
  -3  11   6  358.76   26.30
  -3  11   6  326.87   56.39
  -3  11   6  321.37   26.30
   3  11  -6  336.87   26.30
   3  11  -6  333.87   63.19
  -3 -11   6  321.97   26.50
  -3 -11   6  333.17   28.00
   3 -11  -6  298.87   64.69
  -5  11   8    2.20    1.50
   5  11  -8    0.40    1.40
   5  11  -8   -7.70   53.79
  -5  11   8   -5.00   60.69
  -5  11   8    3.90    1.40
  -5 -11   8    5.90    2.30
  -5 -11   8   -1.40    6.20
   5 -11  -8  -29.80   79.39
  -7  11  10   90.39    7.10
   7  11 -10   91.29    7.20
  -7  11  10   70.99    7.10
  -7 -11  10   81.09    8.00
  -9  11  12  334.37   27.40
   9  11 -12  357.86   27.50
  -9  11  12  355.86   27.40
  -9 -11  12  338.07   27.90
 -11  11  14    7.40    2.40
  11  11 -14    3.80    2.30
 -11 -11  14    4.10    3.90
  13  11 -16   52.59    5.50
 -13  11  16   41.60    5.70
 -13 -11  16   38.20    6.10
 -15  11  18   -0.70    3.80
 -20  12  17   86.29   10.20
 -18  12  15   29.90    4.50
 -18  12  15   22.90    3.70
 -18 -12  15   33.00    6.20
 -16  12  13   20.70    2.90
 -16  12  13   17.20    3.40
 -16 -12  13   20.60    5.20
 -14  12  11   72.59    6.40
 -14 -12  11   66.19    8.50
  12  12  -9   17.10    2.70
 -12  12   9   19.30    2.80
 -12  12   9   16.50    2.40
 -12 -12   9   21.70    3.80
  10  12  -7  241.28   20.00
 -10  12   7  264.37   20.10
  10  12  -7  250.97   19.90
 -10 -12   7  249.58   20.40
  -8  12   5  -54.29   49.90
   8 -12  -5  -34.40   68.79
  -8 -12   5    5.40    2.30
   6  12  -3   70.39    5.80
  -6  12   3   62.89    6.00
  -6  12   3   34.30   48.70
   6  12  -3   73.99    5.90
   6 -12  -3   84.29   67.29
  -6 -12   3   71.09    6.40
  -4  12   1  682.13   56.79
   4  12  -1  759.62   56.79
  -4  12   1  752.42   80.69
  -2  12  -1   28.80   33.20
   2  12   1   28.30    2.80
  -2  12  -1   29.50    2.90
   2  12   1   21.10    2.80
   2 -12   1   31.30    6.90
   0  12  -3   -6.00   32.70
   0  12   3    3.90    1.30
   0  12  -3    4.90    1.40
   0  12   3    2.90    1.30
   0 -12  -3   17.00   31.40
   0 -12   3    5.10    5.50
  -2  12   5  -18.80   44.30
  -2  12   5    9.80    1.60
   2  12  -5   27.20   37.10
  -2  12   5    9.60    1.70
   2  12  -5    7.00    1.70
  -2 -12   5    6.90    5.70
   2 -12  -5   41.40   49.00
  -2 -12   5    7.90    2.30
  -4  12   7    5.10    1.50
  -4  12   7   51.69   59.89
   4  12  -7    2.80    1.60
  -4  12   7    6.60    1.70
  -4 -12   7    1.10    6.20
  -4 -12   7    4.10    2.60
   4 -12  -7   -2.20   74.19
  -6  12   9  432.16   30.80
   6  12  -9  304.67   75.29
  -6  12   9  359.16   30.90
  -8  12  11   26.60    3.60
  -8  12  11   20.70    3.20
  -8 -12  11   14.90    3.90
 -10  12  13    3.70    2.30
  10  12 -13    1.00    2.30
 -10 -12  13    0.90    3.80
  12  12 -15  118.69   10.70
 -12  12  15  128.39   10.80
 -12 -12  15  125.39   12.10
 -14  12  17    3.10    3.70
 -19  13  16    2.30    4.60
 -19  13  16    4.70    3.70
 -17  13  14   18.90    3.20
 -17  13  14   13.80    4.10
 -17 -13  14    7.00    6.00
 -15  13  12   43.80    5.80
 -15  13  12   44.10    5.00
 -15 -13  12   49.60    6.70
 -13  13  10    1.90    2.60
 -13  13  10    2.90    2.00
  13  13 -10    4.40    2.30
 -13 -13  10    4.60    4.10
 -11  13   8   46.60    4.80
  11  13  -8   44.10    4.20
 -11  13   8   36.00    4.40
  -9  13   6   70.79    6.10
   9  13  -6   64.49    5.70
   9  13  -6   58.69    5.80
  -9 -13   6   67.99    6.90
   7  13  -4  143.39   11.10
   7  13  -4  132.69   11.10
  -7  13   4  142.89   11.20
  -7 -13   4  127.19   11.60
   5  13  -2   19.10    2.40
   5  13  -2   15.50    2.40
  -5  13   2   46.70   44.70
  -5  13   2   17.90    2.80
   3  13   0   35.50    3.40
   3  13   0   28.20    3.40
  -3  13   0   16.60   38.60
  -3  13   0   39.30    3.60
   3 -13   0   33.60    8.30
   1  13   2    0.60    1.30
  -1  13  -2   19.50   37.20
  -1  13  -2    0.60    1.40
   1  13   2    2.40    1.40
   1 -13   2    3.60    6.40
  -1  13   4  282.07   22.90
  -1  13   4  391.96   65.39
   1  13  -4  255.17   43.90
   1  13  -4  305.77   23.00
   1 -13  -4  305.67   54.09
  -1 -13   4  276.57   24.60
   3  13  -6    7.40    1.90
  -3  13   6   13.60    1.90
  -3  13   6   16.00   62.39
   3 -13  -6   28.60   68.59
  -3 -13   6   12.90    2.90
   5  13  -8   50.19    5.10
  -5  13   8   49.30    4.90
  -5  13   8   56.19    5.10
  -5 -13   8   58.19    6.50
  -7  13  10    6.60    2.20
   7  13 -10    6.00    2.10
  -7  13  10    5.40    2.10
  -7 -13  10    1.80    3.60
  -9  13  12   73.89    7.20
   9  13 -12   88.49    7.30
  -9 -13  12   69.29    8.90
 -11 -13  14   76.79    9.60
 -18  14  15   20.70    5.50
 -16  14  13   22.90    3.70
  16  14 -13   13.20    3.90
 -16  14  13   27.20    4.30
 -16 -14  13   17.90    6.70
  14  14 -11   71.49    7.40
 -14  14  11   75.99    7.50
 -14  14  11   70.09    6.80
 -14 -14  11   64.49   10.00
  12  14  -9  389.76   28.80
 -12  14   9  355.06   28.70
  12  14  -9  344.67   28.60
 -12  14   9  358.56   28.80
 -12 -14   9  363.76   29.60
  10  14  -7   14.10    2.50
  10  14  -7   14.90    2.30
 -10 -14   7   15.60    4.00
   8  14  -5  135.39   11.80
  -8  14   5  145.89   12.00
   8  14  -5  145.69   11.70
  -8 -14   5  154.08   12.60
  -6  14   3    1.10    1.80
   6  14  -3    4.00    1.60
   6  14  -3    2.10    1.60
   4  14  -1    6.30    1.60
  -4  14   1    3.90    1.80
   4  14  -1    5.10    1.70
   4 -14  -1    5.20   11.00
  -2  14  -1  692.93   52.19
   2  14   1  660.53   52.19
  -2  14  -1  566.14   88.19
   2  14   1  658.23   52.19
   2 -14   1  673.73   53.79
   0  14  -3   49.80    5.00
   0  14   3   59.69    5.00
   0  14   3   51.89    5.10
  -2  14   5  102.09    9.20
   2  14  -5  112.69    9.30
  -2  14   5  121.09    9.30
   4  14  -7  367.46   28.30
  -4  14   7  344.97   28.30
  -4  14   7  374.46   28.30
  -4 -14   7  342.97   28.80
  -6  14   9    4.40    2.40
   6  14  -9    5.50    2.30
  -6  14   9    6.30    2.10
  -6 -14   9    4.00    3.70
  -8  14  11   38.50    5.10
   8  14 -11   47.10    5.20
  -8 -14  11   46.20    6.20
 -10  14  13   24.80    3.70
  10  14 -13   29.10    3.70
 -10 -14  13   26.20    5.80
 -15  15  12  124.19   10.80
  15  15 -12  124.99   11.40
 -15 -15  12  118.39   14.20
 -13  15  10   25.60    3.80
  13  15 -10   28.90    3.90
 -13  15  10   29.70    4.30
 -13 -15  10   21.90    6.20
 -11  15   8  228.18   18.10
  11  15  -8  211.68   17.80
 -11  15   8  207.18   17.90
  11  15  -8  229.68   18.00
 -11 -15   8  237.88   19.20
   9  15  -6  265.37   22.10
  -9  15   6  280.47   22.20
   9  15  -6  286.17   22.00
  -9 -15   6  274.67   22.90
   7  15  -4   34.90    3.80
  -7  15   4   30.00    4.30
  -5  15   2   38.60    4.10
   5  15  -2   33.40    5.10
   5  15  -2   33.30    4.00
   3  15   0   57.19    5.60
  -3  15   0   58.09    5.60
   3  15   0   61.19    5.50
   1  15   2  132.49   11.00
  -1  15  -2  130.79   11.00
   1  15   2  135.69   10.90
  -1  15   4  393.76   31.00
  -1  15   4  378.16   31.00
   1  15  -4  405.76   31.00
   3  15  -6   49.80    4.70
  -3  15   6   39.40    4.90
  -3  15   6   41.50    4.50
  -5  15   8  104.69    9.50
  -5  15   8  109.09    9.10
   5  15  -8  101.59    9.20
  -5 -15   8  116.39   10.60
  -7  15  10   23.00    3.60
   7  15 -10   23.70    4.00
  -7 -15  10   26.80    6.40
  -9  15  12    1.20    2.90
   9  15 -12    7.60    3.10
  -9 -15  12    2.60    5.70
 -14  16  11   47.90    5.90
  12  16  -9    1.50    3.40
 -12  16   9    9.70    3.70
 -12  16   9    5.40    2.80
 -12 -16   9    1.70    6.40
  10  16  -7    6.00    2.90
  10  16  -7    2.90    2.60
 -10  16   7   10.80    2.70
 -10  16   7    3.80    3.10
 -10 -16   7   14.80    5.20
  -8  16   5  103.49    8.90
   8  16  -5   86.29    8.50
   8  16  -5  104.59    8.60
  -6  16   3  121.49   10.20
   6  16  -3  114.99    9.90
   6  16  -3  118.69   10.00
   4  16  -1    4.60    3.00
   4  16  -1    3.90    2.00
  -4  16   1    3.00    2.30
   2  16   1    1.60    2.30
  -2  16  -1    3.90    2.20
   2  16   1    3.10    2.00
   0  16  -3  152.38   12.10
   0  16   3  146.09   11.90
   0  16   3  136.39   12.00
  -2  16   5  179.48   14.40
   2  16  -5  182.98   14.50
  -2  16   5  165.98   14.50
   4  16  -7   13.70    3.00
  -4  16   7   17.80    2.90
  -6  16   9   61.79    6.30
   6  16  -9   58.19    6.50
 -13  17  10   21.10    5.80
  11  17  -8   19.10    4.00
 -11  17   8   19.80    4.50
 -11 -17   8   33.30    6.80
  -9  17   6  107.79    9.80
   9  17  -6  113.79   10.00
   9  17  -6  110.79    9.90
  -9  17   6  117.49   10.30
   7  17  -4  176.08   13.90
   7  17  -4  156.78   14.00
  -7  17   4  171.48   14.10
   5  17  -2   39.80    4.70
   5  17  -2   37.40    5.00
  -5  17   2   36.60    5.00
   3  17   0  226.98   18.50
   3  17   0  239.28   18.50
  -3  17   0  222.08   18.60
   1  17   2   23.20    3.40
  -1  17  -2   19.00    3.30
   1  17   2   24.10    3.10
  -1  17   4   11.40    4.00
  -1  17   4   15.40    3.30
   1  17  -4   11.80    3.00
   3  17  -6    6.50    2.70
  -3  17   6    0.60    2.50
  -5  17   8  106.69   10.60
   5  17  -8  114.89   10.20
 -10  18   7    5.80    5.00
   8  18  -5   44.80    6.90
  -8  18   5   49.40    6.40
   8  18  -5   33.40    4.80
   6  18  -3  156.28   13.30
  -6  18   3  140.49   13.30
   6  18  -3  170.98   13.70
   4  18  -1   87.09    7.70
   4  18  -1   69.79    8.00
  -4  18   1   87.79    8.00
  -2  18  -1   27.70    3.90
   2  18   1   24.10    3.40
   2  18   1   22.50    3.90
   0  18   3   13.20    3.00
   0  18  -3   15.10    3.30
   5  19  -2   15.80    4.10
   3  19   0   36.10    6.40
 -24   0  20    5.20    7.20
 -22   0  18   71.89    7.60
 -20   0  16  122.19   10.60
  18   0 -14  666.43   55.29
 -18   0  14  707.83   56.19
 -18   0  14  628.24   52.29
  16   0 -12  298.17   66.29
 -16   0  12  255.67   22.20
  16   0 -12  235.58   21.70
 -16   0  12  201.58   18.20
 -16   0  12  265.07   59.59
 -14   0  10  151.18   15.40
  14   0 -10  172.58   46.40
 -14   0  10  151.68   12.90
  14   0 -10  184.98   15.70
 -14   0  10  142.79   42.50
  12   0  -8 1549.24  115.19
 -12   0   8 1610.54  114.19
 -12   0   8 1334.17  128.39
 -12   0   8 1305.27  115.49
  10   0  -6  663.23   58.09
 -10   0   6  572.64   46.10
  10   0  -6  535.75   46.80
 -10   0   6  595.54   46.80
 -10   0   6  631.54   56.89
   8   0  -4 3637.14  283.17
  -8   0   4 3278.07  278.97
   8   0  -4 4197.18  278.47
  -8   0   4 3146.69  282.57
  -6   0   2   41.70    3.30
   6   0  -2   41.90   12.10
  -6   0   2   43.60    3.30
  -6   0   2   32.60   11.60
   6   0  -2   42.60    3.30
   6   0  -2   37.10    4.10
  -6   0   2   38.00    4.10
  -4   0   0 1109.19  103.19
   4   0   0 1312.87   99.49
   4   0   0 1253.07   99.89
  -4   0   0 1277.07   99.89
   4   0   0 1236.18   99.49
   4   0   0 1387.36  103.79
  -4   0   0 1345.77   99.59
  -2   0  -2 9999.00  735.53
   2   0   2 8711.43  731.33
   2   0   2 9417.56  735.43
   0   0  -4  949.11   81.49
   0   0   4  962.00   91.89
   0   0   4 1156.28   81.09
   0   0   4 1070.79   81.59
   0   0  -4 1019.00   88.59
   2   0  -6    5.90    2.80
   2   0  -6    5.30   20.40
  -2   0   6    2.30   22.40
  -2   0   6    8.90    1.40
  -2   0   6    8.70    3.40
  -2   0   6   11.00    1.20
   4   0  -8   10.20   31.70
  -4   0   8   33.00    2.80
  -4   0   8   25.60    5.30
  -4   0   8   29.80   31.20
  -4   0   8   29.30    2.70
  -6   0  10    6.30    5.70
  -6   0  10   29.80   39.20
   6   0 -10  -13.50   41.50
   6   0 -10    4.70    5.10
  -6   0  10    6.80    1.30
  -8   0  12 2303.17  181.98
   8   0 -12 2013.40  183.28
  -8   0  12 2469.45  181.98
  -8   0  12 2510.75  184.08
   8   0 -12 2611.54  211.28
  -8   0  12 2115.39  206.18
 -10   0  14    4.00    1.70
  10   0 -14    7.80    9.60
 -10   0  14   10.30   12.10
  10   0 -14  -69.89   82.99
 -10   0  14  -52.99   77.49
 -12   0  16   15.90    2.70
 -12   0  16   16.10    2.70
 -14   0  18  329.27   27.00
 -14   0  18  344.27   26.80
 -16   0  20   -1.90    3.90
 -18   0  22   41.30    6.60
 -25   1  21   15.30    5.90
 -23   1  19    8.80    3.90
 -23  -1  19    8.20    3.80
 -21   1  17   74.79    8.20
 -21  -1  17   88.39    8.10
 -19   1  15   26.60   16.10
 -19   1  15   11.60    2.70
 -19  -1  15   17.20    2.90
  19  -1 -15    7.50   13.80
 -17   1  13   91.59   87.19
  17   1 -13  117.69   15.90
 -17   1  13  113.79    9.80
  17   1 -13   82.29   70.99
  17  -1 -13  135.49   16.90
 -17  -1  13  108.79    9.90
  17  -1 -13  219.58   81.49
 -17  -1  13  149.69   16.80
 -17  -1  13   57.69   62.79
 -15   1  11  569.74   86.39
 -15   1  11  651.93   51.89
  15   1 -11  615.04   53.49
 -15   1  11  764.72   54.19
 -15  -1  11  590.44   51.89
  15  -1 -11  835.42   95.19
  15  -1 -11  657.93   53.89
 -15  -1  11  611.24   85.19
 -15  -1  11  703.23   53.69
  13   1  -9  224.78   39.40
 -13   1   9  146.79   13.60
 -13   1   9  125.59   10.70
 -13   1   9  150.28   10.40
  13   1  -9  127.69   12.90
 -13   1   9  145.99   10.50
 -13   1   9  110.49   35.10
 -13  -1   9   53.99   32.60
 -13  -1   9  125.59   13.90
 -13  -1   9  114.69   10.70
  13  -1  -9  105.09   40.30
  13  -1  -9  124.39   13.10
 -11   1   7  131.29    9.80
 -11   1   7  127.79   28.00
  11   1  -7  116.79   11.30
  11   1  -7  137.79   27.10
 -11   1   7  125.69   10.00
 -11   1   7  133.79   11.60
 -11  -1   7  124.59   10.00
 -11  -1   7  123.69   27.10
  11  -1  -7  150.58   32.10
 -11  -1   7  119.19   11.30
  11  -1  -7  117.19   11.70
   9   1  -5    9.40   15.50
  -9   1   5    1.70    0.40
  -9   1   5    3.40    2.20
  -9   1   5    2.40    0.60
  -9   1   5   -9.10   16.00
   9   1  -5    6.50    2.30
   9  -1  -5    2.30    2.50
  -9  -1   5    4.30    3.40
   9  -1  -5   10.10   18.00
  -9  -1   5   -3.50   13.90
  -9  -1   5    3.00    0.80
  -7   1   3   49.80    5.50
   7   1  -3   73.09   13.80
   7   1  -3   55.29    5.40
  -7   1   3   49.90   15.00
   7   1  -3   60.59    4.60
  -7   1   3   58.69    4.60
  -7   1   3   56.79    4.60
  -7  -1   3   60.29    4.70
   7  -1  -3   41.00   14.90
   7  -1  -3   50.09    5.60
  -7  -1   3   67.29   13.30
   7  -1  -3   59.19    4.60
   5   1  -1 2222.68  170.28
   5   1  -1 1944.91  166.68
   5   1  -1 1965.60  166.98
  -5   1   1 2179.58  167.08
  -5   1   1 2262.87  166.68
   5  -1  -1 1859.41  167.08
  -5  -1   1 1889.81  169.48
   5  -1  -1 2208.48  170.78
  -5  -1   1 2292.27  166.68
   5  -1  -1 2527.05  166.68
   3   1   1    2.30    0.30
   3   1   1    1.10    0.50
   3   1   1    0.50    1.20
  -3   1  -1    1.90    0.30
  -3   1  -1    6.00   11.30
   3   1   1    6.50   10.20
  -3   1  -1    6.40   11.70
   3  -1   1    1.10    1.60
   3  -1   1    0.60    1.60
   3  -1   1    1.70    0.40
   3  -1   1    1.60    0.50
  -3  -1  -1    2.80    0.40
  -3  -1  -1    1.70    1.40
   1   1   3  213.78   17.30
   1   1   3  233.78   17.40
  -1   1  -3  242.18   17.40
  -1   1  -3  202.48   28.40
   1   1   3  230.78   18.00
   1   1   3  216.48   27.80
  -1   1  -3  213.58   17.40
  -1   1  -3  187.98   17.90
   1  -1   3  215.18   17.50
  -1  -1  -3  253.67   17.30
   1  -1   3  224.08   18.40
  -1  -1  -3  236.68   28.10
   1  -1   3  180.38   29.10
   1  -1   3  216.18   17.40
  -1  -1  -3  213.68   17.90
  -1  -1  -3  208.58   17.30
   1   1  -5 1858.61  162.58
   1   1  -5 2162.48  169.78
  -1   1   5 1928.41  168.78
  -1   1   5 1972.80  162.38
  -1   1   5 2179.68  161.78
   1  -1  -5 1824.72  162.28
  -1  -1   5 2319.37  162.48
   1  -1  -5 2247.38  161.68
  -1  -1   5 2181.98  161.78
  -1  -1   5 2151.88  161.78
  -1  -1   5 2006.20  169.78
   1  -1  -5 2003.70  169.48
   3   1  -7  423.76   52.59
  -3   1   7  396.26   31.50
  -3   1   7  363.66   50.19
   3   1  -7  353.96   32.40
  -3   1   7  434.16   31.40
  -3   1   7  406.86   32.60
   3  -1  -7  419.46   52.49
  -3  -1   7  417.46   31.50
  -3  -1   7  416.56   32.70
   3  -1  -7  362.76   32.40
  -3  -1   7  414.26   52.29
  -3  -1   7  419.66   31.50
  -5   1   9  103.79    7.90
  -5   1   9   92.99   10.80
  -5   1   9   93.69    7.70
   5   1  -9  108.39   40.00
  -5   1   9  128.59   36.60
   5  -1  -9   75.39   38.00
  -5  -1   9   91.39    7.80
   5  -1  -9   89.19   10.50
  -5  -1   9   96.79   10.90
  -5  -1   9   99.49    7.80
  -5  -1   9   86.19   39.50
   7   1 -11  188.08   57.09
  -7   1  11  195.88   14.60
   7   1 -11  169.18   17.30
  -7   1  11  185.18   14.60
  -7   1  11  116.09   51.99
  -7   1  11  192.18   18.60
  -7  -1  11  191.58   18.40
  -7  -1  11  185.48   14.60
  -7  -1  11  207.98   55.09
  -7  -1  11  195.28   14.70
   7  -1 -11  148.39   17.30
  -9   1  13   18.10    2.80
  -9   1  13   54.89   65.59
   9   1 -13   11.60    8.20
   9   1 -13   39.30   72.29
  -9   1  13   16.00    2.20
  -9   1  13   30.20   10.40
  -9  -1  13   25.00   10.70
  -9  -1  13   14.60   68.09
  -9  -1  13   17.60    2.80
  -9  -1  13   15.90    2.20
   9  -1 -13   -0.60   71.19
   9  -1 -13   18.50    8.60
 -11   1  15  509.45   37.20
  11   1 -15  422.46   41.50
 -11   1  15  401.46  111.99
 -11   1  15  494.85   37.20
  11  -1 -15  682.23  159.18
 -11  -1  15  474.35   37.20
  11  -1 -15  435.06   42.20
 -11  -1  15  273.77  111.69
 -11  -1  15  487.65   37.30
 -13   1  17    2.00    2.40
 -13   1  17   -0.60    2.40
 -13  -1  17    2.40    2.70
 -13  -1  17    3.60    2.50
 -15   1  19    7.70    4.60
 -15  -1  19    0.40    3.50
 -17   1  21    8.30    4.70
 -17  -1  21    2.00    4.70
 -24   2  20   -0.50    7.10
 -24  -2  20    9.70    4.50
 -22   2  18   24.20    4.20
 -22  -2  18   23.60    4.20
 -20   2  16   43.30    5.20
 -18   2  14   35.60   12.90
 -18   2  14   29.90    2.60
  18   2 -14   24.30   10.40
 -18   2  14   61.49   82.69
 -18   2  14   21.60    3.10
  18  -2 -14    7.50  100.79
 -18  -2  14   20.50    3.20
  18  -2 -14    5.40   11.30
 -18  -2  14   29.30   11.30
  16   2 -12    5.30    6.60
 -16   2  12   12.20   10.80
 -16   2  12   19.10   54.39
  16   2 -12    0.00   56.99
 -16   2  12   10.20    1.20
 -16   2  12    6.40    1.80
 -16  -2  12    8.10    1.90
 -16  -2  12   31.10   52.39
  16  -2 -12   11.00    7.80
  16  -2 -12   10.90   64.19
 -16  -2  12   11.30    7.30
 -14   2  10   54.09   39.30
  14   2 -10   40.10   38.60
 -14   2  10   46.30    9.30
 -14   2  10   42.30    3.20
 -14   2  10   34.90    3.60
  14   2 -10   31.70    6.10
 -14  -2  10   33.70    3.80
 -14  -2  10   57.19   37.40
  14  -2 -10   40.00   47.30
  14  -2 -10   42.20    7.50
 -14  -2  10   45.80    8.30
 -12   2   8  207.98   17.40
 -12   2   8  150.08   35.90
 -12   2   8  181.98   15.30
  12   2  -8  271.47   43.20
  12   2  -8  200.98   16.80
 -12   2   8  184.98   15.50
  12  -2  -8  202.08   17.40
  12  -2  -8  246.78   41.50
 -12  -2   8  196.68   15.60
 -12  -2   8  204.78   33.80
  10   2  -6 1658.23  134.09
 -10   2   6 1440.96  140.79
 -10   2   6 1718.63  133.49
 -10   2   6 1817.02  134.29
  10  -2  -6 1675.43  134.29
 -10  -2   6 1676.83  139.89
 -10  -2   6 1894.91  134.09
 -10  -2   6 1743.63  133.49
  -8   2   4  322.27   26.10
   8   2  -4  381.96   33.50
   8   2  -4  301.37   25.90
  -8   2   4  330.67   36.40
   8   2  -4  307.97   25.30
  -8   2   4  336.87   25.40
  -8  -2   4  292.57   25.80
   8  -2  -4  331.07   26.30
  -8  -2   4  311.87   32.70
   8  -2  -4  393.46   37.70
  -8  -2   4  336.67   25.50
  -6   2   2 1118.59   96.59
  -6   2   2 1112.19   91.49
   6   2  -2 1077.29   91.79
  -6   2   2 1118.59   91.99
   6   2  -2 1216.08   94.79
   6  -2  -2 1269.67   91.49
   6  -2  -2 1213.18   97.19
  -6  -2   2  993.20   94.19
  -6  -2   2 1147.49   91.79
  -6  -2   2 1323.47   91.49
   6  -2  -2 1173.68   92.09
  -6  -2   2 1283.27   91.49
   4   2   0    5.80    1.50
  -4   2   0    6.30   10.90
  -4   2   0    8.40    0.80
  -4   2   0    6.90    1.80
   4   2   0    6.50    0.80
   4   2   0    6.40    1.50
   4   2   0    6.70    0.80
  -4  -2   0   18.00    8.60
   4  -2   0   -0.10   12.20
   4  -2   0    8.90    2.10
  -4  -2   0    3.60    8.50
   2   2   2  227.58   17.30
  -2   2  -2  211.68   16.80
   2   2   2  221.58   25.50
   2   2   2  210.18   16.80
  -2   2  -2  246.18   27.50
   2  -2   2  199.78   16.80
   2  -2   2  222.98   16.90
  -2  -2  -2  206.48   17.30
   0   2   4  936.81   66.09
   0   2   4  905.81   74.09
   0   2   4  864.01   66.79
   0   2  -4  927.51   75.69
   0   2  -4  741.83   66.69
   0   2   4  785.12   66.19
   0  -2  -4  877.01   74.59
   0  -2   4  856.51   66.89
   0  -2  -4  740.13   66.69
   0  -2   4  900.11   66.29
   0  -2   4  846.62   66.19
   2   2  -6  293.47   43.00
   2   2  -6  259.27   23.90
  -2   2   6  292.27   23.00
  -2   2   6  339.27   22.90
  -2   2   6  287.67   40.00
  -2   2   6  295.17   24.00
   2  -2  -6  308.37   23.00
   2  -2  -6  298.37   23.90
  -2  -2   6  256.97   43.20
  -2  -2   6  291.47   23.00
  -2  -2   6  262.27   24.00
   2  -2  -6  245.08   43.10
  -2  -2   6  300.47   23.10
  -4   2   8  381.96   53.49
  -4   2   8  409.36   31.90
   4   2  -8  381.66   32.20
   4   2  -8  448.36   66.99
  -4   2   8  405.86   30.40
  -4  -2   8  394.66   30.50
   4  -2  -8  350.76   57.19
  -4  -2   8  405.16   30.40
  -4  -2   8  405.46   32.00
  -4  -2   8  313.07   57.49
   4  -2  -8  323.77   31.50
  -6   2  10  724.53   78.29
  -6   2  10  644.54   47.40
   6   2 -10  549.35   48.70
  -6   2  10  601.64   49.20
   6   2 -10  648.94   80.09
  -6   2  10  606.74   47.30
  -6  -2  10  571.64   82.39
  -6  -2  10  587.74   47.40
  -6  -2  10  603.24   49.00
  -6  -2  10  581.34   47.30
   6  -2 -10  711.33   83.89
  -8   2  12   72.29    6.00
   8   2 -12   53.79   59.49
  -8   2  12   90.79   13.80
   8   2 -12   58.29   11.70
  -8   2  12   54.99   63.29
  -8   2  12   64.99    6.00
  -8  -2  12   70.99    6.10
   8  -2 -12   71.59   66.89
  -8  -2  12   76.89    6.10
   8  -2 -12   55.39   10.00
  -8  -2  12   85.79   13.30
  -8  -2  12   42.60   58.29
 -10   2  14   12.00    2.00
 -10   2  14  -39.60   79.99
  10   2 -14   12.70    9.40
  10   2 -14   12.60   85.19
 -10   2  14   10.90   12.40
 -10   2  14   13.00    2.00
 -10  -2  14   10.20   11.40
 -10  -2  14   10.40    2.10
 -10  -2  14   67.49   84.89
  10  -2 -14   23.30   96.49
  10  -2 -14    3.60    9.90
 -10  -2  14   13.90    2.30
 -12   2  16   -7.30  115.29
 -12   2  16   25.40    3.80
 -12   2  16   18.90   24.50
 -12   2  16   19.20    2.90
  12  -2 -16   23.50   27.60
  12  -2 -16   81.49  134.39
 -12  -2  16   25.80    3.80
 -12  -2  16   20.10    3.20
 -14   2  18   14.10    3.00
 -14   2  18   12.70    3.20
 -16   2  20   77.19    8.40
 -16  -2  20   66.19    8.70
 -18  -2  22    6.90    5.50
 -23   3  19   45.30    7.00
 -23  -3  19   39.50    5.60
 -21   3  17    0.40    2.90
 -21  -3  17    2.80    3.30
 -19   3  15  124.99   10.20
 -19   3  15  126.09  107.29
 -19  -3  15  111.39   10.20
  19  -3 -15  116.49   22.80
  19  -3 -15  129.99  134.69
  17   3 -13   86.89   13.30
 -17   3  13   97.89    7.40
 -17   3  13  114.99   17.80
 -17   3  13   89.39    7.90
 -17   3  13  132.59   72.19
 -17  -3  13   77.69    8.10
  17  -3 -13   93.79   16.40
  17  -3 -13  155.68   92.39
 -15   3  11  221.38   17.80
  15   3 -11  244.88   20.40
  15   3 -11  234.08   51.99
 -15   3  11  221.48   18.00
 -15   3  11  169.68   56.09
  15  -3 -11  216.48   67.69
  15  -3 -11  219.78   21.60
 -15  -3  11  204.78   51.29
 -15  -3  11  231.28   18.10
  13   3  -9  361.76   29.20
 -13   3   9  398.26   30.00
 -13   3   9  351.96   27.90
 -13   3   9  310.87   57.59
 -13   3   9  344.87   27.70
 -13  -3   9  277.47   50.69
 -13  -3   9  372.26   29.20
  13  -3  -9  333.57   29.80
 -13  -3   9  345.17   28.00
 -11   3   7   -0.20    0.70
  11   3  -7    8.10   20.10
 -11   3   7    3.70   25.70
 -11   3   7    3.50    3.90
 -11  -3   7    0.70    2.80
  11  -3  -7  -24.90   30.80
 -11  -3   7    1.90    1.10
  11  -3  -7    1.80    4.00
 -11  -3   7  -12.20   19.90
  -9   3   5 1239.88  112.59
   9   3  -5 1306.97  104.59
   9   3  -5 1213.58  105.09
  -9   3   5 1297.47  104.69
  -9   3   5 1323.37  105.39
   9   3  -5 1581.54  112.99
  -9  -3   5 1434.76  110.29
  -9  -3   5 1371.46  105.09
   9  -3  -5 1217.58  105.39
   9  -3  -5 1521.35  114.89
   7   3  -3 1015.70   79.79
   7   3  -3 1044.70   76.09
  -7   3   3  900.81   83.09
  -7   3   3  995.20   76.79
  -7   3   3  953.30   76.19
  -7  -3   3  963.40   76.39
   7  -3  -3  939.31   76.79
  -7  -3   3  894.61   79.39
  -7  -3   3 1039.60   76.19
  -5   3   1  205.88   16.40
   5   3  -1  217.38   16.40
  -5   3   1  196.68   26.30
  -5   3   1  199.18   17.00
  -5  -3   1  224.78   16.40
   5  -3  -1  227.58   30.10
   5  -3  -1  207.68   16.40
   5  -3  -1  198.28   17.20
   3   3   1   88.79    7.10
   3   3   1   92.99    7.60
   3   3   1   88.79   16.90
  -3   3  -1   82.49   18.00
  -3   3  -1  101.19    7.10
  -3  -3  -1   86.59   14.80
  -3  -3  -1   94.99    7.10
   3  -3   1   80.89    7.10
  -3  -3  -1   91.49    7.60
   3  -3   1   73.39    8.00
   1   3   3   25.50    2.10
   1   3   3   28.70    3.50
  -1   3  -3   12.90   16.50
  -1   3  -3   21.60    2.00
  -1   3  -3   23.60    3.80
   1   3   3   31.30   14.60
  -1  -3  -3   51.59   15.60
   1  -3   3   25.00    2.20
   1  -3   3   19.10    3.90
   1  -3   3   13.40   17.70
  -1  -3  -3   22.10    3.30
   1  -3   3   21.20    2.10
  -1   3   5  837.22   64.39
   1   3  -5  954.50   76.69
   1   3  -5  807.42   64.99
  -1   3   5  834.92   73.59
  -1   3   5  952.40   64.29
  -1   3   5  849.72   65.09
  -1  -3   5  837.12   65.19
  -1  -3   5  798.12   64.39
   1  -3  -5  793.92   64.99
   1  -3  -5  879.41   74.89
  -1  -3   5  763.12   64.39
  -1  -3   5  721.33   76.19
   1  -3  -5  720.63   64.29
   3   3  -7 1514.95  114.89
  -3   3   7 1064.89  110.89
   3   3  -7 1254.17  101.09
  -3   3   7 1360.46  101.29
   3  -3  -7 1198.28  101.09
  -3  -3   7 1354.56  100.49
  -3  -3   7 1401.86  100.39
  -3  -3   7 1100.19  102.49
  -3  -3   7 1296.17  115.19
   3  -3  -7 1330.97  113.89
  -5   3   9  261.57   43.00
  -5   3   9  185.68   17.20
  -5   3   9  176.28   14.60
  -5   3   9  196.48   14.50
   5   3  -9  212.78   45.80
   5   3  -9  156.98   16.40
   5  -3  -9  155.58   46.50
  -5  -3   9  200.38   14.70
   5  -3  -9  171.78   16.80
  -5  -3   9  183.48   17.10
  -5  -3   9  191.48   14.60
  -5  -3   9  133.79   44.50
  -7   3  11  116.19    9.20
  -7   3  11  139.49   14.80
   7   3 -11  130.19   55.09
  -7   3  11   85.09   51.59
  -7  -3  11  103.49    9.30
   7  -3 -11  110.79   13.50
   7  -3 -11   48.50   58.29
  -7  -3  11  127.39   14.30
  -7  -3  11  114.39    9.40
  -7  -3  11   32.60   55.69
  -9   3  13   32.30    3.70
  -9   3  13   38.10    3.70
   9   3 -13   34.50    9.10
  -9   3  13   45.10   11.60
   9   3 -13   16.00   73.39
  -9   3  13   18.40   68.79
  -9  -3  13   57.99   73.69
  -9  -3  13   45.10    3.80
   9  -3 -13   24.40    9.60
   9  -3 -13  -32.10   81.29
  -9  -3  13   25.30   10.70
  -9  -3  13   33.80    3.80
 -11   3  15   83.89   17.80
 -11   3  15   74.29    6.90
 -11   3  15   64.69   98.99
 -11   3  15   77.39    6.80
  11  -3 -15   75.89   15.10
 -11  -3  15   81.39    7.10
 -11  -3  15   76.39    6.80
  11  -3 -15   99.09  122.59
 -13   3  17  125.19   10.60
 -13   3  17  130.59   10.70
 -13  -3  17  115.99   10.90
 -15   3  19   49.00    6.50
 -15  -3  19   50.79    6.90
 -17  -3  21   10.90    6.20
 -24   4  20    1.40    4.40
 -24  -4  20    7.60    4.90
 -22   4  18  111.79   10.50
 -22  -4  18  112.29   10.70
 -20  -4  16   12.80    3.40
 -18   4  14   11.90   83.79
 -18   4  14   74.69    5.70
 -18   4  14   53.59    6.30
 -18   4  14   86.69   15.40
  18  -4 -14   21.40  116.09
  18  -4 -14   70.99   14.90
 -18  -4  14   67.69    6.80
 -16   4  12   57.09   61.69
 -16   4  12   19.30    2.50
  16   4 -12   19.60   10.30
 -16   4  12   22.10    9.80
 -16   4  12   20.30    2.50
 -16  -4  12   19.60    2.80
  16  -4 -12   61.29   76.09
  16  -4 -12   17.40    9.30
 -16  -4  12   15.40    7.60
 -14   4  10    3.50    0.80
 -14   4  10  -12.10   41.40
 -14   4  10   -0.60    6.60
  14   4 -10   -7.40   35.20
 -14   4  10    4.80    1.30
  14   4 -10    1.70    4.60
  14  -4 -10    4.10    6.60
 -14  -4  10   18.60   37.40
  14  -4 -10   54.89   55.39
 -14  -4  10    8.80    5.00
 -14  -4  10    4.90    1.70
 -12   4   8  377.26   58.09
  12   4  -8  430.96   49.80
 -12   4   8  386.66   31.80
  12   4  -8  390.26   32.70
 -12   4   8  458.45   33.70
  12  -4  -8  420.06   33.50
 -12  -4   8  330.17   50.49
 -12  -4   8  394.86   31.90
 -10   4   6  219.18   16.60
 -10   4   6  219.88   38.80
  10   4  -6  201.28   17.30
  10   4  -6  222.68   16.50
 -10   4   6  220.08   18.10
  10   4  -6  199.88   30.30
  10  -4  -6  214.48   18.20
 -10  -4   6  175.98   31.00
  10  -4  -6  270.27   45.30
 -10  -4   6  200.08   17.30
 -10  -4   6  201.68   16.70
  -8   4   4  650.03   51.09
   8   4  -4  709.13   55.19
  -8   4   4  532.45   60.39
  -8   4   4  613.14   50.29
   8   4  -4  660.33   50.59
   8   4  -4  668.83   50.19
   8  -4  -4  602.44   51.09
   8  -4  -4  804.12   82.29
  -8  -4   4  623.94   55.09
  -8  -4   4  627.24   50.59
  -8  -4   4  666.03   50.39
  -6   4   2  643.34   62.59
   6   4  -2  716.03   57.79
  -6   4   2  731.93   55.39
   6   4  -2  799.02   54.79
  -6   4   2  702.03   54.79
   6   4  -2  634.44   54.89
   6  -4  -2  754.62   63.49
  -6  -4   2  618.64   57.19
   6  -4  -2  689.13   55.49
  -6  -4   2  658.93   54.99
  -6  -4   2  755.32   54.79
   4   4   0   59.49    4.80
   4   4   0   61.29    5.20
  -4   4   0   61.29    5.90
  -4   4   0   59.69    4.90
  -4   4   0   43.40   15.90
   4   4   0   52.19    5.30
   4  -4   0   58.59    4.90
   4  -4   0   65.99   18.20
  -4  -4   0   61.79   11.80
  -4  -4   0   69.39   12.00
   4  -4   0   61.99    6.20
  -4  -4   0   70.59    4.90
   2   4   2  168.58   13.40
   2   4   2  159.58   23.30
   2   4   2  172.98   13.00
  -2   4  -2  227.48   27.90
  -2   4  -2  157.28   26.50
  -2   4  -2  166.38   13.00
   2   4   2  154.78   12.90
   2  -4   2  160.88   13.00
  -2  -4  -2  128.59   23.20
   2  -4   2  181.08   13.00
   2  -4   2  149.49   13.80
  -2  -4  -2  164.28   13.50
   0   4   4  111.99   21.60
   0   4  -4  152.98   27.10
   0   4  -4  126.29   11.40
   0   4   4  122.09   11.30
   0   4  -4  131.09   10.40
   0   4   4  152.28   10.50
   0   4   4  121.59   10.50
   0  -4  -4  124.79   23.90
   0  -4   4  140.49   10.50
   0  -4   4  145.09   10.50
   0  -4  -4  117.79   11.20
   0  -4   4  120.19   26.40
  -2   4   6  876.31   67.39
   2   4  -6  733.93   67.29
  -2   4   6  793.72   66.59
   2   4  -6  937.41   80.89
  -2   4   6  814.22   77.39
  -2   4   6  983.60   66.49
  -2  -4   6  719.73   81.99
  -2  -4   6  850.31   67.49
  -2  -4   6  796.02   66.69
   2  -4  -6  868.41   79.79
   2  -4  -6  968.70   66.49
  -2  -4   6  843.52   66.59
  -4   4   8  426.16   30.00
  -4   4   8  376.06   31.60
   4   4  -8  336.37   31.10
  -4   4   8  365.06   30.00
   4   4  -8  446.26   58.29
  -4   4   8  348.77   54.49
  -4  -4   8  398.66   30.10
   4  -4  -8  373.26   31.40
  -4  -4   8  421.26   31.80
   4  -4  -8  341.87   61.89
  -4  -4   8  385.26   30.10
  -4  -4   8  297.07   52.99
  -6   4  10  291.57   23.50
   6   4 -10  245.38   22.50
   6   4 -10  276.27   54.79
  -6   4  10  165.78   49.40
  -6   4  10  287.97   20.40
  -6   4  10  239.78   20.40
  -6  -4  10  274.37   23.20
  -6  -4  10  250.57   20.50
  -6  -4  10  239.28   20.50
   6  -4 -10  246.98   58.69
  -6  -4  10  260.37   59.39
   6  -4 -10  269.37   23.10
  -8   4  12  323.27   67.29
  -8   4  12  251.77   18.50
   8   4 -12  200.38   21.60
  -8   4  12  235.18   24.30
   8   4 -12  317.27   71.59
  -8   4  12  231.38   18.50
   8  -4 -12  251.97   23.10
  -8  -4  12  225.18   18.50
  -8  -4  12  130.49   71.39
   8  -4 -12  209.18   79.09
 -10   4  14   30.60   86.89
  10   4 -14   -2.80    9.20
 -10   4  14    7.90    1.80
 -10   4  14   12.10   13.50
 -10   4  14    7.50    2.00
 -10  -4  14    7.40    2.30
  10  -4 -14  -58.29  102.79
  10  -4 -14    8.50   11.00
 -10  -4  14    9.20    1.90
 -10  -4  14   13.40   11.40
 -12   4  16   24.60    4.10
 -12   4  16   28.40    4.00
 -12  -4  16   33.40    4.10
 -12  -4  16   33.70    4.50
 -14   4  18   54.19    6.20
 -14   4  18   57.69    6.30
 -14  -4  18   44.50    6.70
 -16  -4  20    6.90    4.30
 -23   5  19   17.50    4.30
 -23  -5  19   26.50    5.30
 -21   5  17   43.20    5.90
 -21  -5  17   41.10    6.20
 -19   5  15   14.10    2.80
 -19   5  15   23.90   17.50
 -19   5  15   12.40    2.00
  19  -5 -15   -0.90   15.80
 -17   5  13   98.49    7.50
  17   5 -13   93.69   14.40
 -17   5  13   94.19   15.70
 -17   5  13   81.69    7.90
 -17   5  13   78.39   77.39
 -17  -5  13   84.69    8.30
  17  -5 -13   62.29  104.49
 -17  -5  13  106.69   14.90
  17  -5 -13  104.89   19.00
  15   5 -11   97.49   12.20
 -15   5  11  128.19   16.00
 -15   5  11   99.79    8.20
 -15   5  11   90.99   54.89
 -15   5  11   92.99    8.40
  15  -5 -11  109.89   15.60
 -15  -5  11  107.09   12.40
 -15  -5  11  106.79    8.90
 -13   5   9   87.49    7.30
  13   5  -9   83.69    9.50
  13   5  -9  128.99   34.00
 -13   5   9   63.69   41.80
 -13   5   9   90.29   12.30
  13  -5  -9  105.09   12.30
 -13  -5   9   98.39    9.70
  13  -5  -9   95.19   53.49
 -13  -5   9   82.59    7.60
 -11   5   7  114.89    9.30
 -11   5   7  120.59   34.70
  11   5  -7  126.69    9.10
 -11   5   7  124.49   12.20
  11   5  -7  113.39   10.40
  11   5  -7  129.69   23.80
 -11  -5   7   88.69   25.40
 -11  -5   7  117.49   10.40
  11  -5  -7  110.19   39.90
 -11  -5   7  104.99    9.50
  11  -5  -7  108.49   11.90
   9   5  -5  529.35   45.60
   9   5  -5  531.75   39.50
  -9   5   5  533.45   40.80
   9   5  -5  494.55   39.90
  -9   5   5  492.65   39.60
  -9   5   5  471.15   54.79
  -9  -5   5  459.05   46.40
   9  -5  -5  520.35   40.80
  -9  -5   5  499.15   39.90
  -9  -5   5  492.95   39.70
   7   5  -3  837.02   61.79
   7   5  -3  757.42   58.79
  -7   5   3  670.03   58.69
  -7   5   3  762.12   69.09
   7   5  -3  758.62   58.59
  -7  -5   3  825.42   61.39
   7  -5  -3  691.63   59.49
  -7  -5   3  760.52   58.69
   7  -5  -3  837.82   70.09
  -7  -5   3  674.33   58.79
  -5   5   1  105.39   21.10
   5   5  -1  104.59    8.00
   5   5  -1  110.39    8.20
   5   5  -1   94.39    8.20
  -5   5   1   96.89    9.10
  -5  -5   1   95.49   12.40
   5  -5  -1   90.29    9.30
  -5  -5   1  109.69    8.10
  -5  -5   1  103.39   13.80
  -3   5  -1  210.08   29.30
   3   5   1  256.47   18.10
   3   5   1  211.08   18.00
   3   5   1  250.47   25.80
   3  -5   1  231.98   19.00
  -3  -5  -1  252.47   25.40
  -3  -5  -1  199.28   18.40
  -1   5  -3  139.79   24.30
  -1   5  -3  152.48   26.50
   1   5   3  146.59   11.20
   1   5   3  148.99   11.20
   1   5   3  127.59   11.20
  -1   5  -3  139.99   11.20
   1  -5   3  152.38   11.30
  -1  -5  -3  145.49   11.90
  -1  -5  -3  182.78   26.90
   1  -5   3  134.89   11.30
   1  -5   3  154.48   12.50
   1  -5   3  124.99   12.40
  -1   5   5  386.16   43.00
  -1   5   5  367.96   28.40
  -1   5   5  344.67   28.40
   1   5  -5  443.56   49.70
   1   5  -5  342.47   29.30
   1   5  -5  368.06   28.40
  -1   5   5  383.56   29.30
  -1  -5   5  342.07   50.79
   1  -5  -5  385.76   45.90
  -1  -5   5  357.66   28.50
  -1  -5   5  395.76   29.60
  -1  -5   5  369.36   28.50
   1  -5  -5  346.07   29.20
   1  -5  -5  329.47   28.40
  -3   5   7  382.76   30.30
   3   5  -7  368.36   31.40
  -3   5   7  420.66   31.60
   3   5  -7  393.66   58.09
  -3   5   7  381.86   52.39
  -3  -5   7  395.06   30.40
  -3  -5   7  389.76   30.40
   3  -5  -7  444.66   55.69
  -3  -5   7  313.07   60.89
   3  -5  -7  362.66   31.50
  -5   5   9    5.10    1.10
  -5   5   9  -27.70   36.30
   5   5  -9   45.70   40.70
  -5   5   9    9.00    1.10
   5   5  -9    0.10    4.40
  -5   5   9    5.00    5.60
  -5  -5   9    9.70    1.50
   5  -5  -9   -0.60   42.60
  -5  -5   9    5.70    1.30
  -5  -5   9   43.20   46.00
   5  -5  -9    1.50    5.20
   7   5 -11  210.88   59.59
  -7   5  11  175.28   18.70
   7   5 -11  145.19   16.30
  -7   5  11  152.08   12.90
  -7   5  11  127.49   56.39
  -7  -5  11  167.98   12.90
  -7  -5  11  189.18   17.40
   7  -5 -11  170.88   67.59
  -7  -5  11  155.58   13.20
  -7  -5  11  138.89   66.19
  -9   5  13  147.79   10.80
  -9   5  13  152.98   20.70
   9   5 -13  105.59   16.50
  -9   5  13  154.48   75.99
  -9   5  13  135.19   10.80
  -9  -5  13  131.09   19.30
  -9  -5  13  136.29   10.80
   9  -5 -13  138.49   19.00
  -9  -5  13  117.39   11.00
   9  -5 -13   77.69   94.89
 -11   5  15   43.80    4.60
 -11   5  15   32.10    4.30
 -11  -5  15   38.20    5.00
 -11  -5  15   49.90    4.50
 -13   5  17  112.39    9.50
 -13   5  17  106.39    9.60
 -13  -5  17  106.79    9.80
 -15   5  19   12.70    4.60
 -15  -5  19    5.60    3.90
 -17  -5  21   16.40    5.20
 -24   6  20   36.10    5.70
 -22   6  18   17.80    4.10
 -22  -6  18   18.70    5.00
 -20   6  16  232.38   18.20
 -20  -6  16  211.78   18.50
 -18   6  14  -53.89  162.78
 -18   6  14    0.50    2.10
 -18   6  14    0.50    1.50
 -18  -6  14    3.50    2.80
  18  -6 -14  163.68  176.18
 -16   6  12   30.60   12.40
 -16   6  12   27.00    3.40
 -16   6  12   23.10    2.70
  16   6 -12   38.30    8.30
 -16  -6  12   20.50    3.30
  16  -6 -12   11.00   12.10
  16  -6 -12  120.59   92.99
 -16  -6  12   34.20    7.90
 -14   6  10  245.18   55.49
 -14   6  10  143.19   11.80
  14   6 -10  148.39   14.30
 -14   6  10  135.89   11.90
 -14  -6  10  170.18   14.20
 -14  -6  10  142.09   12.20
  14  -6 -10  162.08   17.40
  14  -6 -10  154.08   68.59
 -12   6   8  492.65   37.20
  12   6  -8  567.94   60.89
  12   6  -8  478.35   35.00
  12   6  -8  449.26   36.00
 -12   6   8  442.16   67.89
 -12   6   8  410.46   35.20
  12  -6  -8  422.96   37.30
 -12  -6   8  419.16   35.30
  12  -6  -8  636.34   78.49
 -12  -6   8  445.16   35.90
 -12  -6   8  353.46   55.49
  10   6  -6 1207.38   89.39
 -10   6   6  973.60   98.69
  10   6  -6 1153.58   83.49
 -10   6   6 1172.78   84.89
  10   6  -6 1047.80   83.89
 -10   6   6  994.70   83.59
 -10  -6   6 1034.90   90.79
 -10  -6   6 1030.00   83.69
 -10  -6   6 1003.30   83.89
  10  -6  -6 1062.19   84.89
  -8   6   4   52.89    4.60
   8   6  -4   62.59    4.50
   8   6  -4   61.09   11.80
   8   6  -4   50.69    4.90
  -8   6   4   63.49    7.10
  -8   6   4   69.59   24.90
   8  -6  -4   45.00   27.10
  -8  -6   4   54.19    4.90
   8  -6  -4   49.50    7.30
  -8  -6   4   49.90   12.00
  -6   6   2  101.19    8.20
  -6   6   2   95.49    9.50
  -6   6   2   79.09   22.80
   6   6  -2  114.39    8.20
   6  -6  -2   90.19    9.80
  -6  -6   2  108.99    8.30
   4   6   0  593.24   46.90
   4   6   0  589.04   46.90
  -4   6   0  558.14   56.39
  -4   6   0  620.14   47.60
   4   6   0  607.34   47.00
   4   6   0  513.05   46.80
   4  -6   0  645.64   60.19
  -4  -6   0  692.33   46.90
   4  -6   0  582.64   48.00
  -4  -6   0  612.64   48.90
  -4  -6   0  579.84   49.60
  -2   6  -2   77.99   20.90
  -2   6  -2   95.29   24.30
   2   6   2   76.79    6.00
  -2   6  -2   78.59    6.10
   2   6   2   75.09    6.70
   2   6   2   83.09   16.90
   2  -6   2   69.69    7.70
   2  -6   2   75.39    6.20
  -2  -6  -2   66.79   15.90
  -2  -6  -2   78.29    6.80
   2  -6   2   74.59    7.90
   2  -6   2   73.39    6.20
   0   6   4 1369.26  103.49
   0   6  -4 1224.18  102.89
   0   6   4 1337.87  110.59
   0   6   4 1271.07  102.79
   0   6   4 1281.87  102.89
   0  -6   4 1428.76  103.79
   0  -6   4 1306.37  102.99
   0  -6   4 1336.97  102.89
   0  -6  -4 1312.07  103.39
   2   6  -6   37.70    6.70
  -2   6   6   36.10    3.10
  -2   6   6   32.90    6.10
   2   6  -6   32.30   30.50
  -2   6   6   43.40    3.20
  -2   6   6   38.60   26.10
   2   6  -6   34.30    3.20
  -2  -6   6   41.50    6.70
  -2  -6   6   39.70    3.30
   2  -6  -6   34.30    6.10
  -2  -6   6   26.10   35.30
  -2  -6   6   32.60    3.40
   2  -6  -6   25.40   28.10
   4   6  -8   83.19   38.40
  -4   6   8   97.99    7.30
   4   6  -8   83.69   10.10
  -4   6   8   67.09   36.00
  -4   6   8   89.29    7.40
  -4   6   8   95.19   11.20
  -4  -6   8   70.39   45.50
  -4  -6   8   88.79    7.40
   4  -6  -8  136.19   43.80
   4  -6  -8   83.79   10.50
  -4  -6   8   88.29   10.80
  -4  -6   8   93.89    7.60
  -6   6  10  832.72   58.99
  -6   6  10  602.24   92.59
   6   6 -10  772.42   96.79
  -6   6  10  786.72   56.49
  -6   6  10  688.73   56.49
   6   6 -10  669.03   57.99
  -6  -6  10  741.63   56.59
  -6  -6  10  748.73   58.49
  -6  -6  10  650.53   56.69
  -6  -6  10  534.85  104.29
  -8   6  12   36.50   12.00
  -8   6  12   24.00    2.70
  -8   6  12   23.70    2.70
   8   6 -12   17.50    7.70
  -8   6  12    8.80   64.19
   8  -6 -12  -14.50   77.59
  -8  -6  12    5.30    8.20
  -8  -6  12   16.80    2.80
  -8  -6  12   22.50    3.40
   8  -6 -12   17.80    9.70
 -10   6  14   51.19    4.80
 -10   6  14   47.60    4.70
 -10  -6  14   44.30    4.80
 -10  -6  14   51.79    5.20
 -12   6  16    2.80    2.30
 -12   6  16    0.40    2.50
 -12  -6  16   -0.80    2.70
 -12  -6  16    2.70    2.50
 -14   6  18    4.40    3.20
 -14  -6  18   11.70    3.70
 -16  -6  20   77.09    9.40
 -23   7  19   70.09    8.50
 -23  -7  19   62.09    9.70
 -21   7  17    0.70    3.40
 -21  -7  17    5.10    4.10
 -19   7  15   34.40    3.90
 -19   7  15   31.50    5.80
 -19  -7  15   37.20    5.90
 -17   7  13   96.39    7.60
 -17   7  13   85.69    8.00
 -17  -7  13   93.39    8.70
 -15   7  11  110.89    9.40
 -15   7  11   63.49   68.29
 -15   7  11  107.89    9.20
 -15   7  11  112.59   17.60
  15   7 -11  133.49   15.10
  15  -7 -11   97.29   17.50
 -15  -7  11  134.29   13.00
 -15  -7  11  113.89   10.10
  15  -7 -11   47.70   88.19
  13   7  -9  284.57   23.70
  13   7  -9  304.87   22.20
 -13   7   9  307.47   25.80
 -13   7   9  209.78   58.09
  13  -7  -9  259.57   25.60
  13  -7  -9  373.36   73.39
 -13  -7   9  202.28   48.20
 -13  -7   9  279.27   23.50
 -13  -7   9  277.17   22.70
 -11   7   7   -3.70   35.80
 -11   7   7   15.60    6.00
  11   7  -7   30.40   18.80
 -11   7   7    6.50    1.40
  11   7  -7   10.40    1.20
 -11  -7   7    8.10    1.90
 -11  -7   7    9.90    2.80
  11  -7  -7    8.90    5.90
 -11  -7   7   10.80   25.40
   9   7  -5  236.68   17.00
  -9   7   5  229.78   18.70
   9   7  -5  228.88   16.70
   9   7  -5  236.18   23.80
  -9   7   5  209.88   16.80
  -9   7   5  223.28   37.20
  -9  -7   5  211.48   16.90
   9  -7  -5  313.17   50.39
  -9  -7   5  188.68   16.90
  -9  -7   5  162.38   27.10
   9  -7  -5  176.88   18.70
  -7   7   3 1384.26  125.09
  -7   7   3 1433.96  115.39
  -7   7   3 1597.14  116.29
  -7  -7   3 1489.65  115.49
   7  -7  -3 1461.95  116.29
  -5   7   1   11.30   21.80
   5   7  -1   10.40    1.30
  -5   7   1   13.80    1.50
   5  -7  -1   19.90    3.80
   5  -7  -1   65.69   26.80
  -5  -7   1   11.90    1.60
   3   7   1    1.60    0.60
  -3   7  -1    1.00   22.10
  -3   7  -1    0.30    0.70
  -3   7  -1    7.80   20.40
   3   7   1    2.60   12.10
   3   7   1    0.30    1.40
   3   7   1    0.60    0.50
  -3  -7  -1   -3.60   10.40
  -3  -7  -1    2.00    0.80
   3  -7   1    6.40    3.30
  -3  -7  -1    1.50    1.60
   1   7   3   35.30    3.30
   1   7   3   56.29   19.70
  -1   7  -3   42.50   26.80
   1   7   3   40.20    3.40
   1   7   3   49.90    5.00
  -1   7  -3   43.30    3.50
  -1  -7  -3   43.90    4.90
   1  -7   3   39.90    3.60
   1  -7   3   41.00    6.30
   1  -7   3   42.60    6.40
   1  -7   3   39.00    3.60
  -1  -7  -3   44.10   19.60
   1   7  -5  495.65   57.69
  -1   7   5  378.56   31.20
  -1   7   5  368.66   30.30
  -1   7   5  439.46   49.40
  -1   7   5  397.56   30.20
   1   7  -5  378.66   30.30
   1   7  -5  392.86   51.69
   1  -7  -5  367.56   52.09
  -1  -7   5  385.96   30.30
  -1  -7   5  414.46   31.60
  -1  -7   5  364.76   30.40
   1  -7  -5  373.56   31.10
  -3   7   7 1059.09  100.59
   3   7  -7  926.41   71.79
  -3   7   7  918.91   71.69
  -3   7   7 1019.10   71.69
  -3   7   7  947.51   72.89
   3  -7  -7  997.90   95.89
  -3  -7   7  896.01   71.89
  -3  -7   7  832.12   71.79
  -3  -7   7  690.83   98.19
  -3  -7   7  985.00   73.09
   3  -7  -7  821.02   72.69
  -5   7   9   -1.10    1.20
  -5   7   9    6.70   43.00
  -5   7   9    2.90    1.00
  -5   7   9    6.90    6.90
   5   7  -9   -0.30   46.10
   5   7  -9   10.40    6.60
  -5  -7   9  -22.20   56.39
  -5  -7   9    1.80    6.10
   5  -7  -9    0.30    6.10
  -5  -7   9    3.20    1.30
  -5  -7   9    0.80    2.00
  -7   7  11    4.40   60.59
  -7   7  11   19.40    2.50
   7   7 -11   13.50    7.10
   7  -7 -11  -32.50   72.19
  -7  -7  11   19.10    2.80
  -7  -7  11   25.10    3.30
  -7  -7  11   25.20    8.70
  -9   7  13   36.50    3.70
  -9   7  13   34.20    3.70
  -9  -7  13   32.70    3.90
  -9  -7  13   30.60    4.40
 -11   7  15    4.60    2.50
 -11   7  15    4.20    2.20
 -11  -7  15    8.20    2.40
 -13   7  17  134.39   10.50
 -13   7  17  118.29   11.90
 -13  -7  17  109.39   11.20
 -15   7  19   12.50    3.90
 -22   8  18    8.30    4.20
 -22  -8  18    1.70    4.90
 -20   8  16   -0.50    3.00
 -20   8  16   -0.50    2.40
 -20  -8  16    0.50    3.90
 -18   8  14   53.59    6.30
 -18   8  14   67.29    5.60
 -18  -8  14   59.79    7.10
 -16   8  12    9.00    2.10
 -16   8  12    7.40    1.60
  16   8 -12    1.30    8.30
 -16  -8  12    6.10    3.10
 -16  -8  12    6.90    7.00
 -14   8  10  255.07   20.80
  14   8 -10  270.37   22.70
 -14   8  10  261.07   69.39
 -14   8  10  252.57   20.70
  14   8 -10  277.57   20.50
  14  -8 -10  261.57   26.80
 -14  -8  10  273.77   22.10
 -14  -8  10  236.98   21.10
  14  -8 -10  486.25   90.99
 -12   8   8   15.30    2.00
  12   8  -8   -7.60   22.20
  12   8  -8   11.00    4.10
 -12   8   8   28.10    8.50
  12   8  -8   13.60    1.60
 -12   8   8   41.50   47.50
 -12  -8   8    8.90    2.40
 -12  -8   8   17.00   36.70
  12  -8  -8   10.80    7.40
 -12  -8   8   14.50    3.20
 -10   8   6  258.67   21.40
 -10   8   6  208.68   44.30
 -10   8   6  239.48   18.70
 -10  -8   6  238.08   25.20
  10  -8  -6  238.48   21.30
  10  -8  -6  344.37   54.39
 -10  -8   6  211.08   18.90
  -8   8   4   36.20    3.60
   8   8  -4   39.40    3.40
  -8   8   4   51.49    7.50
  -8   8   4   34.50   28.60
  -8  -8   4   40.40    3.70
   8  -8  -4   35.30    7.50
   8  -8  -4    3.00   34.60
  -6   8   2  268.17   22.40
  -6   8   2  308.97   23.70
   6   8  -2  290.87   22.30
  -6   8   2  362.66   64.89
   6  -8  -2  295.67   51.29
  -6  -8   2  310.57   22.50
   6  -8  -2  236.08   23.60
   4   8   0  157.58   14.10
   4   8   0  184.28   14.10
  -4   8   0  178.78   15.40
  -4   8   0  212.18   35.00
  -4   8   0  184.08   14.10
   4  -8   0  169.58   15.60
   4  -8   0  177.38   35.60
  -4  -8   0  190.98   14.10
   2   8   2  454.55   32.60
   2   8   2  401.36   43.40
   2   8   2  427.06   32.20
  -2   8  -2  409.86   32.20
  -2   8  -2  377.76   48.90
  -2   8  -2  509.85   55.49
   2   8   2  402.96   32.20
   2  -8   2  372.56   33.30
  -2  -8  -2  410.96   42.10
   2  -8   2  430.36   33.50
  -2  -8  -2  371.46   32.60
   0   8   4  131.29   28.70
   0   8   4  154.28   12.30
   0   8  -4  138.29   11.00
   0   8   4  124.39   10.90
   0   8  -4  192.08   37.50
   0   8   4  140.29   11.00
   0   8  -4  180.98   32.10
   0  -8  -4  128.59   29.40
   0  -8   4  139.69   11.10
   0  -8   4  133.99   13.30
   0  -8   4  148.79   13.10
   0  -8  -4  125.49   12.00
   2   8  -6  503.05   65.09
   2   8  -6  323.37   59.49
  -2   8   6  427.86   31.40
   2   8  -6  367.66   30.00
  -2   8   6  352.56   29.90
  -2   8   6  420.96   56.59
  -2   8   6  382.86   30.00
   2  -8  -6  454.85   64.19
  -2  -8   6  383.66   30.10
  -2  -8   6  359.76   31.50
  -4   8   8   50.19    4.30
  -4   8   8   52.59   42.20
  -4   8   8   50.59    4.20
  -4   8   8   49.10   10.10
   4   8  -8   48.70    4.30
   4   8  -8   12.70   42.80
  -4  -8   8   44.20    4.70
  -4  -8   8   52.89   10.10
   4  -8  -8   74.69   51.49
  -4  -8   8   52.19    4.40
   6   8 -10  231.48   22.90
  -6   8  10  245.28   19.50
  -6   8  10  213.58   61.59
  -6  -8  10  238.88   19.70
  -6  -8  10  247.18   19.50
  -6  -8  10  271.37   23.30
  -8   8  12   33.50    3.60
  -8   8  12   33.40    3.50
  -8  -8  12   31.70    4.50
  -8  -8  12   33.20    3.80
 -10   8  14  106.79    8.10
 -10   8  14   78.89    8.00
 -12   8  16   40.00    5.10
 -12  -8  16   45.70    6.20
 -14   8  18    8.40    3.30
 -14  -8  18    1.90    4.20
 -21   9  17   10.00    4.00
 -21  -9  17   10.50    5.30
 -19   9  15   16.90    2.60
 -19   9  15   13.30    3.30
 -19  -9  15   19.40    4.70
 -17   9  13  335.17   24.70
 -17   9  13  312.97   24.50
 -17  -9  13  277.17   25.20
 -15   9  11  179.08   13.80
 -15   9  11  171.18   13.60
  15   9 -11  177.38   17.70
 -15  -9  11  167.58   16.10
 -15  -9  11  155.68   14.50
 -13   9   9   19.50   58.09
  13   9  -9    6.60    4.60
 -13   9   9    2.20    1.70
  13   9  -9    4.00    1.00
 -13  -9   9    2.50    3.30
  13  -9  -9  -38.60   87.89
 -13  -9   9    2.50    2.50
 -11   9   7  255.07   18.30
 -11   9   7  245.08   21.90
 -11   9   7  210.58   51.99
 -11  -9   7  206.68   18.50
  11  -9  -7  202.38   21.50
  11  -9  -7  351.06   65.79
  -9   9   5  199.68   17.90
  -9   9   5  193.08   15.00
   9   9  -5  185.88   14.90
  -9   9   5  116.09   41.40
   9  -9  -5  210.78   50.99
   9  -9  -5  187.78   17.90
  -9  -9   5  184.78   15.20
  -7   9   3  537.95   64.49
  -7   9   3  514.65   44.60
   7   9  -3  610.94   42.50
  -7   9   3  527.35   42.60
  -7  -9   3  558.84   42.60
   7  -9  -3  498.05   43.90
   5   9  -1  691.53   52.49
  -5   9   1  686.63   69.29
  -5   9   1  664.23   52.49
   5   9  -1  629.74   52.49
   5  -9  -1  740.33   77.59
   5  -9  -1  584.14   53.49
  -5  -9   1  753.22   52.59
  -3   9  -1  112.89   30.90
  -3   9  -1  126.99    9.40
  -3   9  -1  165.18   36.70
   3   9   1  107.09    9.30
   3   9   1  114.09    9.30
   3  -9   1  109.69   11.50
   3  -9   1  128.89   12.20
   1   9   3  916.21   75.39
  -1   9  -3  775.72   63.69
   1   9   3  735.73   63.59
  -1   9  -3  894.61   79.79
  -1   9  -3 1069.09   96.69
   1   9   3  808.32   63.69
   1  -9   3  743.23   64.69
  -1  -9  -3  735.03   64.09
   1  -9   3  905.71   64.89
  -1  -9  -3  836.32   75.49
  -1   9   5    9.60    1.40
  -1   9   5   44.70   31.00
   1   9  -5   12.30    1.60
   1   9  -5  -12.20   31.70
   1   9  -5   10.80   38.50
  -1   9   5    8.70    4.30
  -1  -9   5    9.40    1.90
   1  -9  -5   12.80   34.70
  -1  -9   5   20.80    5.80
  -1  -9   5   14.90    5.20
  -3   9   7   77.19    6.10
  -3   9   7   80.39   41.40
   3   9  -7   70.19    6.20
  -3   9   7   74.69    6.20
   3   9  -7   64.99   45.70
   3  -9  -7  127.69   52.69
  -3  -9   7   78.19    6.60
  -3  -9   7   71.79   11.00
  -5   9   9   56.99   52.79
   5   9  -9   83.69   57.39
  -5   9   9   55.69    5.40
   5   9  -9   62.49    5.40
  -5   9   9   69.19    5.30
  -5  -9   9   62.89    5.90
  -5  -9   9   74.59   12.30
   5  -9  -9   43.70   65.69
  -7   9  11  314.67   25.40
  -7   9  11  329.07   25.30
   7   9 -11  340.67   25.40
   7   9 -11  288.37   29.90
  -7  -9  11  312.87   29.70
  -7  -9  11  328.37   25.70
  -9   9  13  175.58   15.20
  -9   9  13  202.58   15.20
 -11   9  15  134.29   11.40
 -11  -9  15  140.39   12.20
 -13   9  17   65.49    6.90
 -13  -9  17   65.09    8.20
 -22  10  18    2.40    4.70
 -20  10  16  276.67   20.70
 -20  10  16  237.38   21.00
 -20 -10  16  256.57   24.40
 -18  10  14   47.30    4.70
 -18  10  14   40.90    5.70
 -18 -10  14   43.80    6.10
 -16  10  12    3.00    2.40
 -16  10  12    7.50    1.80
 -16 -10  12    3.40    3.70
 -14  10  10  523.75   41.50
 -14  10  10  563.54   41.70
 -14 -10  10  499.95   42.00
 -12  10   8   50.99    4.70
 -12  10   8   26.50   55.79
  12  10  -8   49.80    4.20
 -12 -10   8   43.00    5.70
  12 -10  -8  -27.10   74.29
 -10  10   6   17.10   45.70
  10  10  -6   27.80    2.70
 -10  10   6   28.40    3.10
 -10 -10   6   24.40    3.90
  10 -10  -6   76.79   60.19
   8  10  -4    9.30    1.30
   8 -10  -4   13.80    6.10
   8 -10  -4  -17.50   47.60
  -8 -10   4    5.70    1.90
  -6  10   2  660.23   50.39
   6  10  -2  652.63   49.00
   6  10  -2  600.94   49.00
  -6  10   2  566.24   71.69
  -6  10   2  649.04   49.20
  -6 -10   2  660.43   49.10
   6 -10  -2  594.64   84.39
   6 -10  -2  559.54   50.29
  -4  10   0  918.81   89.69
   4  10   0  862.11   72.19
  -4  10   0  899.81   72.29
   4  10   0  925.41   72.29
  -4 -10   0 1058.09   72.29
   4 -10   0  878.41   73.29
  -2  10  -2 1152.08  101.69
   2  10   2 1125.89   85.69
  -2  10  -2 1071.19   85.99
  -2  10  -2 1304.67  109.09
   2  10   2 1079.39   85.69
   2  10   2 1207.88   85.89
   2  10   2 1052.49   91.49
  -2 -10  -2  970.90   85.89
  -2 -10  -2 1087.19   90.79
   2 -10   2  998.30   86.69
   2 -10   2 1142.29   86.99
   0  10  -4  148.09   11.60
   0  10   4  172.18   35.60
   0  10   4  157.08   11.60
   0  10  -4  135.99   38.70
   0  10  -4  165.38   71.89
   0  10   4  150.48   13.30
   0  10   4  154.08   11.50
   0 -10   4  165.28   14.70
   0 -10  -4  118.39   12.90
   0 -10   4  122.89   14.30
   0 -10   4  138.79   11.90
   2  10  -6  697.63   87.09
  -2  10   6  763.42   54.59
  -2  10   6  671.03   82.49
   2  10  -6  659.13   54.69
  -2  10   6  696.13   54.69
  -2 -10   6  671.93   54.89
   2 -10  -6  703.63   91.09
  -2 -10   6  709.53   56.19
  -4  10   8  193.58   57.79
  -4  10   8  158.88   13.20
   4  10  -8  172.38   13.30
   4  10  -8  189.08   63.19
  -4  10   8  165.68   13.20
   4 -10  -8  169.68   70.99
  -4 -10   8  155.28   17.60
  -4 -10   8  171.48   13.60
  -6  10  10   65.29    5.90
  -6  10  10   71.29    5.80
   6  10 -10   64.89    5.90
   6  10 -10  -20.20  133.89
  -6 -10  10   53.89   10.90
  -6 -10  10   74.89    6.60
   8  10 -12  274.37   22.10
  -8  10  12  257.77   21.80
  -8  10  12  294.07   21.70
  -8 -10  12  268.97   22.80
  10  10 -14  229.78   16.90
 -10  10  14  194.18   16.80
 -10 -10  14  200.08   17.40
 -12  10  16   90.29    9.00
  12  10 -16  110.69    8.90
 -12 -10  16   96.19   10.30
 -14  10  18   38.90    5.50
  14  10 -18   37.30    5.40
 -14 -10  18   29.10    6.90
 -21  11  17    4.70    4.50
 -19  11  15   54.29    6.90
 -19  11  15   53.49    5.90
 -17  11  13  134.99   11.60
 -17  11  13  139.29   11.20
 -17 -11  13  129.79   13.10
 -15  11  11   19.80    2.80
 -15  11  11   12.30    2.20
 -15 -11  11    5.10    4.00
  13  11  -9    6.10    1.40
 -13  11   9   -0.20    2.00
 -13 -11   9    6.00    3.30
 -11  11   7  150.98   12.10
  11  11  -7  154.18   11.90
  11 -11  -7  250.97   83.39
 -11 -11   7  136.99   12.60
   9  11  -5  373.56   27.70
   9  11  -5  325.77   27.80
  -9  11   5  412.96   75.79
  -9  11   5  352.86   27.90
   9 -11  -5  425.96   77.99
  -9 -11   5  349.47   28.00
  -7  11   3   86.79   41.30
  -7  11   3   80.09    7.10
   7  11  -3   74.89    6.90
   7  11  -3   93.99    6.90
   7 -11  -3   93.19   58.29
  -7 -11   3   89.79    7.30
  -5  11   1  161.78   12.80
   5  11  -1  147.29   12.70
  -5  11   1  170.98   40.70
  -5 -11   1  169.78   12.80
   5 -11  -1  151.68   54.19
   3  11   1   82.89    7.20
  -3  11  -1   91.39    7.30
   3  11   1   88.09    7.30
  -3  11  -1  112.69   38.30
   3 -11   1  104.19   12.00
   1  11   3  632.34   66.49
  -1  11  -3  638.54   51.19
   1  11   3  652.53   51.09
  -1  11  -3  520.35   88.79
   1  11   3  668.33   51.09
  -1 -11  -3  568.94   65.59
   1 -11   3  733.03   52.79
  -1  11   5    3.30    1.20
   1  11  -5  -40.40   41.60
   1  11  -5    3.60    1.30
  -1  11   5    3.10    1.20
  -1  11   5    7.40   41.30
  -1 -11   5    5.40    2.00
  -1 -11   5    6.70    7.10
   1 -11  -5    7.90   47.40
  -3  11   7   49.90    4.50
  -3  11   7  102.39   64.69
   3  11  -7   44.00    4.50
  -3  11   7   55.99    4.50
   3  11  -7   46.50   53.79
   3 -11  -7   44.70   67.39
  -3 -11   7   57.89    9.00
  -3 -11   7   49.90    5.30
  -5  11   9   20.70    2.80
   5  11  -9   21.70    2.80
  -5  11   9   21.90    2.80
   5  11  -9   16.80   71.69
  -5 -11   9   22.90    3.20
  -5 -11   9   14.10    8.70
  -7  11  11  246.48   18.90
   7  11 -11  239.68   19.00
  -7 -11  11  225.28   19.40
   9  11 -13   86.49    7.60
  -9  11  13   82.09    7.50
  -9 -11  13   83.39    8.70
 -11  11  15   11.00    2.80
  11  11 -15    9.60    2.80
 -11 -11  15    5.30    4.20
  13  11 -17   18.00    3.90
 -13  11  17   15.80    3.70
 -13 -11  17   14.00    5.30
 -20  12  16   17.90    4.50
 -20  12  16   17.60    4.60
 -18  12  14    2.20    2.60
 -18  12  14    0.30    3.50
 -16  12  12    9.80    2.30
 -16  12  12    7.10    2.90
 -16 -12  12    6.40    4.60
 -14  12  10    6.40    2.30
 -14  12  10   13.20    3.10
 -14 -12  10   13.90    4.20
  12  12  -8  208.68   15.70
 -12  12   8  196.68   16.00
 -12 -12   8  184.58   16.50
 -10  12   6  321.17   25.60
  10  12  -6  305.87   25.60
 -10 -12   6  345.27   26.00
  -8  12   4   -1.60   51.69
   8  12  -4    4.00    1.30
   8  12  -4    2.80    1.40
  -8  12   4    2.20    1.60
  -8 -12   4   -0.30    2.10
   8 -12  -4  -48.40   72.79
  -6  12   2  321.57   56.89
   6  12  -2  347.57   26.40
  -6  12   2  330.27   26.50
   6  12  -2  313.87   26.40
  -6 -12   2  352.66   26.60
   6 -12  -2  355.06   74.99
  -4  12   0    0.80    1.30
   4  12   0    0.40    1.20
   4  12   0    0.10    1.20
   4 -12   0    6.60    8.60
  -2  12  -2    9.40    1.70
   2  12   2   11.60    1.60
  -2  12  -2   -4.60   41.10
   2  12   2    9.30    1.50
   2 -12   2   14.80    7.20
   0  12   4  194.88   16.50
   0  12   4  204.48   16.50
   0  12   4  185.68   43.50
   0  12  -4  212.18   16.60
   0  12  -4  233.78   49.30
   0 -12  -4  198.38   43.50
   0 -12   4  231.88   19.80
   2  12  -6  160.58   12.50
  -2  12   6  156.08   12.50
   2  12  -6  132.19   53.79
  -2  12   6  132.59   58.59
  -2  12   6  151.68   12.40
  -2 -12   6  149.79   17.00
   2 -12  -6  157.78   66.39
  -2 -12   6  157.38   12.90
  -4  12   8  228.18   17.10
   4  12  -8  174.68   70.79
  -4  12   8  196.98   17.20
   4  12  -8  226.78   17.20
  -4 -12   8  200.58   21.50
  -4 -12   8  219.18   17.60
   6  12 -10  138.39   11.10
  -6  12  10  136.19   11.10
  -6 -12  10  128.39   11.90
   8  12 -12    7.70    2.20
  -8  12  12    3.20    2.20
  -8 -12  12    7.70    3.40
 -10  12  14    0.80    2.60
  10  12 -14   -0.60    2.40
 -10 -12  14   -1.10    4.20
 -12  12  16   35.20    4.60
  12  12 -16   40.40    5.50
 -12 -12  16   36.60    6.50
 -19  13  15   24.20    5.10
 -19  13  15   29.00    4.10
 -17  13  13   16.40    3.00
 -17  13  13   14.70    3.80
 -15  13  11   72.29    7.40
 -15  13  11   76.09    6.80
 -15 -13  11   67.49    9.50
  13  13  -9  190.88   15.80
 -13  13   9  193.58   15.70
  13  13  -9  193.78   15.50
 -13  13   9  200.58   15.90
  11  13  -7    0.80    2.00
 -11  13   7   -0.90    2.20
  11  13  -7    2.50    1.60
 -11 -13   7    1.10    3.30
   9  13  -5  348.17   26.30
   9  13  -5  331.07   26.40
  -9  13   5  330.17   26.50
  -9 -13   5  324.17   26.70
  -7  13   3  370.06   29.00
   7  13  -3  380.06   28.90
   7  13  -3  339.27   28.90
   7 -13  -3  329.07  122.49
  -7 -13   3  380.56   29.20
  -5  13   1    7.00   48.50
   5  13  -1   17.30    2.40
  -5  13   1   16.80    2.70
   5  13  -1   15.50    2.30
   5 -13  -1   20.80    9.70
  -3  13  -1   30.40   44.90
   3  13   1    2.30    1.30
   3  13   1    4.00    1.70
  -3  13  -1   -0.60    1.60
   3 -13   1    1.60    8.20
   1  13   3   12.10    1.70
  -1  13  -3  -15.70   45.50
   1  13   3    8.00    1.70
  -1  13  -3    6.80    1.80
   1 -13   3   11.40    7.60
  -1  13   5   76.99    6.30
  -1  13   5   73.59    6.20
  -1  13   5   37.60   53.39
   1  13  -5   67.89    6.40
   1  13  -5   84.29   58.59
   1 -13  -5   71.49   54.79
  -1 -13   5   78.19   13.50
  -3  13   7  381.86   30.70
  -3  13   7  371.26   30.60
   3  13  -7  327.67   88.19
   3  13  -7  399.66   30.70
  -3 -13   7  409.26   31.10
   5  13  -9  125.99    9.80
  -5  13   9  115.29    9.70
  -5  13   9  116.69    9.60
  -5 -13   9  102.49   10.50
  -7  13  11   56.39    5.60
   7  13 -11   59.29    5.60
  -7 -13  11   48.70    7.20
  -9  13  13   59.39    6.40
   9  13 -13   61.69    6.50
  -9 -13  13   68.79    8.40
 -11  13  15    4.10    3.20
 -18  14  14   -0.60    3.20
 -18  14  14   -1.70    4.30
 -16  14  12    9.00    3.70
 -16  14  12    5.50    2.80
  16  14 -12    5.90    3.50
 -16 -14  12    4.20    6.40
 -14  14  10    7.40    3.20
  14  14 -10    9.20    3.10
 -14  14  10    4.80    2.40
 -14 -14  10    2.60    5.10
  12  14  -8    4.50    2.00
 -12  14   8    1.70    2.60
  12  14  -8    2.70    2.50
 -12 -14   8    4.40    4.30
  10  14  -6  153.48   13.50
  10  14  -6  171.68   13.00
 -10  14   6  174.88   13.20
 -10 -14   6  131.39   14.50
  -8  14   4   30.30    3.80
   8  14  -4   31.80    3.40
  -8 -14   4   25.60    3.90
   6  14  -2    1.60    1.60
   6  14  -2    2.70    1.60
  -6  14   2    3.30    1.90
  -4  14   0   21.70    3.10
   4  14   0   22.90    2.90
   4  14   0   19.70    2.90
  -2  14  -2   28.30   48.90
   0  14   4  156.58   12.70
   0  14   4  161.78   12.70
   0  14  -4  153.98   12.80
   2  14  -6   21.00    2.80
  -2  14   6   20.60    3.30
  -2  14   6   27.40    3.50
  -4  14   8    2.70    2.00
   4  14  -8    3.00    2.10
  -4  14   8    1.50    2.40
  -4 -14   8   -4.30    3.40
   6  14 -10   87.39    7.30
  -6  14  10   71.89    7.20
  -6 -14  10   80.79    8.80
   8  14 -12   10.00    3.00
  -8 -14  12   12.20    5.30
 -10  14  14   13.00    5.30
 -17  15  13    9.90    4.70
 -15  15  11   20.80    3.60
  15  15 -11   33.70    4.40
 -15  15  11   26.20    4.60
 -15 -15  11   27.20    7.00
  13  15  -9    3.90    2.90
 -13  15   9    0.90    3.20
 -13  15   9    6.20    2.60
 -13 -15   9    9.60    5.20
 -11  15   7   11.20    2.90
  11  15  -7    4.50    2.20
  11  15  -7    6.50    2.50
 -11 -15   7    6.00    4.40
  -9  15   5  110.19   10.20
   9  15  -5  128.59   10.10
   9  15  -5  112.59    9.90
  -9 -15   5  123.99   11.00
   7  15  -3    1.60    2.00
   7  15  -3    4.70    2.00
  -7  15   3    3.30    2.20
   5  15  -1   91.19    7.60
  -5  15   1   87.69    7.80
   5  15  -1   84.99    7.50
  -3  15  -1    2.10    2.00
   3  15   1    0.40    1.70
   3  15   1   -0.50    1.80
   1  15   3    0.80    2.00
  -1  15  -3   -1.30    2.00
   1  15   3    3.20    1.80
   1  15  -5  175.88   14.90
  -1  15   5  191.38   14.90
  -1  15   5  183.58   14.80
   3  15  -7    0.40    2.30
  -3  15   7    3.40    2.10
   5  15  -9   29.90    4.50
  -5  15   9   27.70    4.10
  -7  15  11    9.70    2.90
   7  15 -11    5.30    2.90
  -7 -15  11    1.30    5.00
 -14  16  10   12.50    4.20
 -14  16  10    9.20    3.50
  14  16 -10   12.20    3.70
 -14 -16  10   21.80    7.10
 -12  16   8  313.37   26.00
 -12  16   8  309.97   25.80
  12  16  -8  312.57   25.90
 -12 -16   8  364.36   27.30
 -10  16   6   30.10    4.00
  10  16  -6   32.30    4.80
  10  16  -6   30.90    4.30
 -10 -16   6   29.10    5.40
   8  16  -4   77.49    6.80
  -8  16   4   75.99    7.30
   8  16  -4   70.49    7.00
   6  16  -2  132.09   11.00
   6  16  -2  131.99   11.10
  -6  16   2  135.89   11.30
   4  16   0    0.10    2.00
   4  16   0    2.30    2.30
  -4  16   0    2.30    2.30
   2  16   2  165.78   13.70
   2  16   2  165.18   13.60
  -2  16  -2  171.58   13.80
   0  16  -4   38.50    4.70
   0  16   4   36.60    4.40
   0  16   4   37.20    4.90
  -2  16   6   64.69    5.90
   2  16  -6   54.59    6.10
  -4  16   8   86.69    7.70
   4  16  -8   81.09    8.10
  -6  16  10   35.80    5.20
   6  16 -10   36.00    5.70
 -13  17   9    8.90    4.50
 -11  17   7    7.60    3.30
 -11  17   7    3.80    3.60
  11  17  -7    8.90    3.20
 -11 -17   7    8.60    5.70
  -9  17   5   17.60    3.80
   9  17  -5   31.80    4.40
   9  17  -5   17.70    3.40
  -7  17   3  146.39   11.10
   7  17  -3  126.29   10.70
   7  17  -3  107.59   10.80
   5  17  -1    3.00    2.30
   5  17  -1    3.40    2.70
  -5  17   1    2.60    2.70
   3  17   1   37.60    4.40
   3  17   1   28.90    4.00
  -3  17  -1   38.70    4.90
   1  17   3  111.19    9.00
   1  17   3   78.89   10.20
  -1  17  -3  112.29    9.30
  -1  17   5   61.39    6.60
   1  17  -5   72.79    6.90
   3  17  -7   80.59    8.20
  -3  17   7   90.29    8.00
  10  18  -6    6.30    3.70
   8  18  -4   24.80    3.80
   8  18  -4   25.30    4.80
  -8  18   4   21.70    4.30
   6  18  -2   24.90    4.00
   6  18  -2   24.00    3.50
  -6  18   2   22.50    3.90
   4  18   0   38.00    5.20
  -4  18   0   40.50    5.80
   4  18   0   48.40    5.90
   2  18   2   82.69    8.00
  -2  18  -2   88.49    8.40
   0  18  -4   14.90    4.10
   7  19  -3    8.40    5.00
 -24   0  19    1.80    3.90
 -22   0  17    2.20    3.00
 -20   0  15    3.00    2.30
  18   0 -13    1.60    8.70
  18   0 -13 -125.49   73.19
 -18   0  13  -20.20   65.69
 -18   0  13    0.50    1.90
 -18   0  13    7.70    9.20
 -16   0  11    0.00    1.60
 -16   0  11    7.80   46.80
  16   0 -11  -70.99   51.09
  16   0 -11   -1.20    6.40
 -16   0  11    0.10    6.40
  14   0  -9    3.10    9.10
  14   0  -9   -4.70   38.00
 -14   0   9    2.80    1.20
 -14   0   9   19.30   32.90
 -14   0   9    4.30    5.10
  12   0  -7    3.50    3.60
 -12   0   7   12.60   24.50
 -12   0   7   -0.70    3.10
 -12   0   7    1.00    1.00
  12   0  -7   -3.20   25.70
  10   0  -5  -17.60   16.70
  10   0  -5   -0.50    2.70
 -10   0   5   -3.70   16.90
  -8   0   3    5.70   14.40
   8   0  -3    0.10    2.10
  -8   0   3   -1.40    0.50
  -8   0   3   -1.80    0.50
  -8   0   3   -1.60    1.90
   8   0  -3   -0.30   13.80
   8   0  -3   -0.70    0.50
   6   0  -1    0.00    1.90
  -6   0   1   -0.80    1.60
  -6   0   1   -1.50    0.40
   6   0  -1   -0.30   13.60
   6   0  -1   -1.70    0.50
  -6   0   1    8.70   12.70
   4   0   1    1.30    0.40
  -4   0  -1   -1.40   12.20
  -4   0  -1    1.30    0.40
   4   0   1   -0.70    1.90
   4   0   1    2.20    0.70
   4   0   1    3.80    2.10
  -2   0  -3   -0.40   18.40
   2   0   3   -6.30   16.00
   2   0   3    1.00    0.70
   2   0   3   -0.30    2.00
  -2   0  -3   -0.20    1.90
   0   0   5   -5.20    2.70
   0   0   5   -2.50    0.50
   0   0   5    6.80   22.20
   0   0   5   -1.70    0.70
   0   0  -5    4.30   22.40
   0   0  -5   -0.90    2.50
  -2   0   7    1.30    0.90
  -2   0   7   -0.70    0.60
   2   0  -7    0.90    3.20
   2   0  -7    1.30   28.50
  -2   0   7    0.10    3.80
  -2   0   7  -13.10   28.90
  -4   0   9   -3.20    4.90
  -4   0   9    1.70    0.90
  -4   0   9   -0.90    1.10
   4   0  -9   -3.00   37.60
  -4   0   9  -21.60   34.40
   4   0  -9   -5.90    4.20
   6   0 -11   38.60   56.09
  -6   0  11   33.90   52.19
  -8   0  13   -4.30   68.09
  -8   0  13    1.20    1.60
   8   0 -13  -33.70   74.99
  -8   0  13    2.90    1.60
  -8   0  13    2.90   11.00
   8   0 -13    1.40    9.40
  10   0 -15    1.10   11.80
  10   0 -15   19.80  111.59
 -10   0  15   -3.00   14.70
 -10   0  15   -0.10    2.00
 -10   0  15    2.60    2.00
 -10   0  15    7.70   96.79
 -12   0  17    1.60    2.60
 -12   0  17    2.00    2.60
 -14   0  19    2.10    3.80
 -16   0  21   -1.30    4.70
 -25   1  20   41.50    6.30
 -25  -1  20   53.69    7.60
 -23   1  18   21.70    4.30
 -23  -1  18   29.40    4.40
 -21   1  16   59.39    7.10
 -21  -1  16   53.99    6.40
 -19   1  14   12.60    2.40
 -19   1  14   17.70   12.00
  19   1 -14    2.10   10.00
  19  -1 -14   19.30   11.50
 -19  -1  14    7.10    2.50
 -19  -1  14   10.80   10.50
 -17   1  12    4.20    8.10
  17   1 -12    0.00    7.10
 -17   1  12   15.80   55.19
 -17   1  12    4.00    1.80
  17   1 -12   -1.40   61.49
 -17  -1  12   37.10   55.19
  17  -1 -12  -55.59   68.09
 -17  -1  12    0.30    1.70
  17  -1 -12    2.40    8.00
 -17  -1  12    2.20   12.70
  15   1 -10  530.55   69.39
 -15   1  10  347.67   29.30
 -15   1  10  388.86   31.50
  15   1 -10  370.86   31.20
  15  -1 -10  359.86   31.50
 -15  -1  10  395.96   31.30
 -15  -1  10  350.06   29.40
  15  -1 -10  459.95   74.79
 -15  -1  10  384.86   65.39
 -13   1   8  447.26   34.10
 -13   1   8  455.65   75.99
 -13   1   8  408.16   34.30
  13   1  -8  439.46   35.50
  13   1  -8  526.55   58.49
 -13   1   8  433.96   35.70
 -13  -1   8  466.65   35.50
  13  -1  -8  388.16   35.60
 -13  -1   8  457.25   54.59
 -13  -1   8  445.76   34.30
  13  -1  -8  440.36   60.09
 -11   1   6  345.57   26.30
 -11   1   6  324.57   25.10
  11   1  -6  290.17   26.00
 -11   1   6  324.17   25.20
 -11   1   6  332.67   41.80
 -11  -1   6  333.77   25.50
  11  -1  -6  322.07   26.40
 -11  -1   6  224.98   39.60
 -11  -1   6  322.97   26.00
  11  -1  -6  342.77   44.10
  -9   1   4  825.72   62.89
  -9   1   4  707.13   70.09
   9   1  -4  731.53   62.49
   9   1  -4  897.11   69.69
  -9   1   4  775.92   61.99
   9   1  -4  832.42   61.89
  -9  -1   4  734.33   68.49
  -9  -1   4  823.82   61.99
   9  -1  -4  702.33   62.59
   9  -1  -4  888.31   61.99
  -7   1   2   16.20   14.80
  -7   1   2   30.00    2.60
  -7   1   2   26.30    3.80
   7   1  -2   23.50    3.70
   7   1  -2   45.80   14.00
   7   1  -2   32.70    2.60
   7  -1  -2   37.20   15.70
   7  -1  -2   29.90    2.60
  -7  -1   2   33.40    2.60
  -7  -1   2   34.90    2.60
  -7  -1   2   22.00   12.30
  -5   1   0  419.96   33.10
   5   1   0  375.66   32.70
  -5   1   0  341.07   39.60
   5   1   0  382.76   32.10
   5   1   0  433.16   32.20
  -5   1   0  421.76   32.10
   5  -1   0  401.66   32.80
   5  -1   0  430.56   32.20
   5  -1   0  514.25   41.80
  -5  -1   0  415.66   39.50
  -3   1  -2 2949.90  210.08
   3   1   2 2590.54  204.18
   3   1   2 2461.25  208.88
  -3  -1  -2 2894.91  203.68
  -3  -1  -2 2346.37  204.18
   3  -1   2 2350.36  203.78
   3  -1   2 2540.95  204.28
  -3  -1  -2 2787.12  209.28
   1   1   4  183.38   32.70
  -1   1  -4  200.28   18.00
  -1   1  -4  206.38   17.10
  -1   1  -4  176.18   33.70
   1   1   4  243.38   17.20
   1   1   4  234.88   18.10
   1   1   4  234.38   17.10
  -1  -1  -4  243.08   34.50
   1  -1   4  230.48   17.30
  -1  -1  -4  204.38   18.00
  -1  -1  -4  224.98   17.10
   1  -1   4  213.58   18.10
   1  -1   4  198.88   34.70
   1  -1   4  203.28   17.10
  -1   1   6  860.01   65.09
  -1   1   6  796.22   78.79
  -1   1   6  879.71   65.99
   1   1  -6  819.72   80.19
   1   1  -6  719.73   65.79
  -1   1   6  878.91   64.99
   1  -1  -6  826.52   79.29
  -1  -1   6  903.31   65.19
   1  -1  -6  763.92   65.79
  -1  -1   6  886.41   64.99
  -1  -1   6  861.21   65.99
  -1  -1   6  687.73   79.59
  -3   1   8  229.48   18.50
   3   1  -8  210.78   43.10
  -3   1   8  199.88   40.90
  -3   1   8  215.38   16.40
   3   1  -8  182.48   17.70
  -3   1   8  222.18   16.30
   3  -1  -8  197.18   17.90
   3  -1  -8  303.77   44.40
  -3  -1   8  155.68   41.90
  -3  -1   8  208.78   18.40
  -3  -1   8  189.28   16.30
  -5   1  10  334.57   60.69
  -5   1  10  448.86   33.00
   5   1 -10  471.85   74.99
   5   1 -10  383.46   34.60
  -5   1  10  477.35   35.30
  -5   1  10  433.16   33.00
   5  -1 -10  575.74   78.49
  -5  -1  10  438.06   35.40
  -5  -1  10  414.66   33.00
   5  -1 -10  381.86   34.70
  -5  -1  10  395.46   33.10
  -5  -1  10  347.87   64.29
  -7   1  12   28.90    3.10
  -7   1  12   26.20    3.30
  -7   1  12   31.60   10.20
   7   1 -12   28.30    7.90
  -7   1  12   33.80   58.19
   7   1 -12   10.80   59.69
  -7  -1  12   29.90    3.30
   7  -1 -12   16.80    7.80
  -7  -1  12   46.90   10.10
  -7  -1  12   40.80   63.79
   7  -1 -12  -13.60   66.19
  -7  -1  12   38.90    3.50
   9   1 -14   38.00   10.70
  -9   1  14   85.59   85.29
   9   1 -14   60.19   90.79
  -9   1  14   36.10    3.70
  -9   1  14   31.20   12.70
  -9   1  14   30.90    3.80
  -9  -1  14   25.90    3.70
  -9  -1  14   35.70    3.90
   9  -1 -14   99.89   95.69
  -9  -1  14   16.40   87.69
  -9  -1  14   27.80   13.50
   9  -1 -14   35.30   11.30
 -11   1  16  107.89   22.40
 -11   1  16  122.59  118.49
 -11   1  16   75.59    7.50
 -11   1  16   84.39    7.50
  11  -1 -16  317.67  148.89
  11  -1 -16   49.60   16.90
 -11  -1  16   94.09    7.60
 -13   1  18   73.79    7.50
 -13   1  18   64.19    7.50
 -13  -1  18   73.79    7.60
 -13  -1  18   87.49    7.60
 -15   1  20   78.29    8.70
 -15  -1  20   80.09    8.90
 -17  -1  22    0.70    6.10
 -24   2  19   13.70    4.50
 -24  -2  19   15.60    4.60
 -22   2  17  105.29    9.70
 -22  -2  17  108.99    9.90
 -20   2  15    5.10    2.50
 -20  -2  15    7.60    2.70
 -18   2  13  581.64  103.79
 -18   2  13  501.95   40.40
  18   2 -13  484.15   43.30
 -18   2  13  580.94   44.60
  18  -2 -13  528.15  103.59
  18  -2 -13  507.05   44.30
 -18  -2  13  531.75   43.40
 -18  -2  13  476.95   40.40
  16   2 -11  193.08   18.60
 -16   2  11  224.98   20.10
 -16   2  11  207.08   15.20
 -16   2  11  180.98   15.50
  16   2 -11  349.67   57.59
 -16   2  11  126.09   54.89
  16  -2 -11  190.58   19.60
  16  -2 -11  300.17   68.19
 -16  -2  11  130.89   51.19
 -16  -2  11  207.08   18.50
 -16  -2  11  167.08   15.60
  14   2  -9   22.50    5.30
 -14   2   9   25.50    2.10
 -14   2   9   25.20   35.30
 -14   2   9   24.30    2.60
 -14   2   9   18.10    6.00
  14   2  -9   17.90   34.30
 -14  -2   9   10.80   32.80
 -14  -2   9   24.40    2.90
  14  -2  -9   48.40   43.40
  14  -2  -9   24.40    6.30
  12   2  -7 1367.16  102.79
 -12   2   7 1036.60  103.79
 -12   2   7 1352.56   93.09
  12   2  -7 1121.29   92.69
 -12  -2   7 1146.69   91.99
  12  -2  -7 1152.78   92.99
 -12  -2   7 1031.40  102.09
 -10   2   5  115.09   25.80
  10   2  -5  167.18   30.10
 -10   2   5  131.39   11.40
  10   2  -5  127.09   11.00
 -10   2   5  126.99   10.00
 -10  -2   5  136.79   24.60
  10  -2  -5  129.99   26.80
 -10  -2   5  127.39   10.90
 -10  -2   5  120.59   10.20
  10  -2  -5  120.49   11.50
  -8   2   3  687.43   55.09
   8   2  -3  684.33   54.39
   8   2  -3  715.83   60.39
  -8   2   3  608.94   62.59
  -8   2   3  677.93   54.39
   8   2  -3  652.43   54.89
  -8  -2   3  766.52   54.39
  -8  -2   3  744.13   54.49
   8  -2  -3  654.63   55.19
  -8  -2   3  692.53   54.89
   8  -2  -3  749.13   54.39
  -8  -2   3  628.74   60.09
   8  -2  -3  769.12   63.79
  -6   2   1   27.40    2.20
   6   2  -1   22.40    3.30
   6   2  -1   39.40   12.80
   6   2  -1   26.40    2.20
  -6   2   1   26.90   15.70
  -6   2   1   25.10    3.80
  -6  -2   1   27.70    2.30
  -6  -2   1   22.90    3.20
   6  -2  -1   26.80    2.20
  -6  -2   1   14.90   11.70
   6  -2  -1   24.50   16.30
   6  -2  -1   24.30    4.00
  -4   2  -1   27.60    2.30
   4   2   1   31.20    3.50
  -4   2  -1   35.30   17.10
  -4   2  -1   35.40   16.30
   4   2   1   26.30    2.40
  -4  -2  -1   29.80    2.30
   4  -2   1   20.40    3.90
   4  -2   1   28.40    2.50
  -4  -2  -1   34.20   13.30
  -2   2  -3 1926.61  146.49
  -2   2  -3 1662.23  139.39
   2   2   3 1980.40  139.39
  -2   2  -3 1792.02  138.79
   2   2   3 1884.81  138.89
   2   2   3 1573.74  144.49
  -2  -2  -3 1599.44  139.29
   2  -2   3 1754.72  138.79
   2  -2   3 2005.50  139.99
  -2  -2  -3 1859.81  145.79
   2  -2   3 1707.93  138.89
   2  -2   3 1575.34  146.19
   0   2  -5  280.57   25.50
   0   2   5  359.56   25.70
   0   2  -5  289.17   42.80
   0   2   5  315.67   24.60
   0   2   5  371.96   42.80
   0  -2  -5  265.87   24.60
   0  -2   5  326.37   24.80
   0  -2   5  331.67   45.10
   0  -2   5  321.17   25.70
   0  -2   5  326.47   24.70
   0  -2  -5  314.77   25.50
   0  -2  -5  307.17   41.90
  -2   2   7  436.26   31.40
  -2   2   7  457.45   53.19
  -2   2   7  397.56   31.50
   2   2  -7  374.56   32.50
  -2  -2   7  411.26   32.90
   2  -2  -7  386.06   32.50
   2  -2  -7  380.16   55.59
  -2  -2   7  317.07   56.49
  -2  -2   7  404.56   31.40
  -2  -2   7  402.66   31.50
  -4   2   9  482.65   36.80
   4   2  -9  523.45   72.89
  -4   2   9  427.16   36.90
  -4   2   9  533.65   38.90
   4   2  -9  429.76   38.30
   4  -2  -9  449.66   40.20
  -4  -2   9  384.36   62.59
  -4  -2   9  471.25   36.90
  -4  -2   9  514.15   39.00
  -4  -2   9  457.65   37.00
   4  -2  -9  574.14   71.79
  -6   2  11    4.50    1.20
   6   2 -11    8.10   51.09
  -6   2  11    1.50   51.39
  -6   2  11    0.10    7.60
   6   2 -11    4.80    6.00
  -6   2  11    3.20    1.30
   6  -2 -11   -0.40    6.20
  -6  -2  11   45.40   54.09
   6  -2 -11  -56.39   53.69
  -6  -2  11    2.40    1.40
  -6  -2  11   10.90    7.50
  -6  -2  11    6.30    1.60
  -8   2  13   81.99   16.80
  -8   2  13   10.40   68.59
   8   2 -13   67.09   11.00
   8   2 -13   78.39   73.99
  -8   2  13   62.59    5.60
  -8   2  13   63.89    5.50
  -8  -2  13   64.69   12.80
  -8  -2  13   61.19    5.70
  -8  -2  13   61.39    5.70
  -8  -2  13   29.40   92.59
   8  -2 -13  123.89   84.79
   8  -2 -13   63.69   11.50
 -10   2  15  143.19   12.20
 -10   2  15  142.69  102.09
 -10   2  15  145.49   12.10
 -10   2  15  192.78   27.20
  10   2 -15  110.79   21.00
 -10  -2  15  186.88   33.90
 -10  -2  15  169.78   12.30
  10  -2 -15  133.59   22.60
  10  -2 -15  113.89  122.49
 -10  -2  15  141.19   12.30
 -12   2  17  148.89   12.00
 -12  -2  17  120.49   12.10
 -12  -2  17  156.98   12.00
 -14   2  19   57.79    7.20
 -14   2  19   59.89    7.00
 -14  -2  19   55.99    7.30
 -16  -2  21    7.00    4.70
 -25   3  20   25.30    5.20
 -25  -3  20   28.50    5.60
 -23   3  18   -0.50    3.20
 -23  -3  18   -2.40    3.60
 -21   3  16    2.50    2.70
 -21  -3  16   -0.40    2.80
 -19   3  14   13.10   84.79
 -19   3  14    0.50   14.20
  19  -3 -14   -3.60   12.90
  19  -3 -14  157.28  114.39
  17   3 -12  152.38   16.80
 -17   3  12  147.19   12.80
 -17   3  12   32.60   61.49
 -17   3  12  194.38   20.00
 -17   3  12  165.58   12.50
  17  -3 -12  124.49   81.49
  17  -3 -12  152.68   19.30
 -17  -3  12  156.78   13.00
  15   3 -10  282.27   51.69
 -15   3  10  241.68   52.09
  15   3 -10  269.17   23.80
 -15   3  10  280.57   21.70
 -15   3  10  258.77   21.90
 -15   3  10  320.77   25.20
 -15  -3  10  252.27   22.00
 -15  -3  10  299.57   23.80
  15  -3 -10  268.97   25.00
  15  -3 -10  314.17   64.89
  13   3  -8  256.27   46.00
 -13   3   8  224.68   18.10
 -13   3   8  259.57   20.30
  13   3  -8  221.38   19.40
 -13   3   8  183.68   40.20
  13  -3  -8  335.87   49.00
 -13  -3   8  271.57   44.70
  13  -3  -8  227.38   20.40
 -13  -3   8  219.68   18.20
 -13  -3   8  218.68   19.30
  11   3  -6    6.80    2.70
 -11   3   6    5.30    3.80
 -11   3   6  -14.80   24.00
 -11   3   6    4.10    0.90
  11   3  -6   12.10   18.20
 -11  -3   6    2.80    1.20
  11  -3  -6    7.30   27.60
 -11  -3   6    5.30   18.60
 -11  -3   6    3.80    2.50
  11  -3  -6    5.50    3.80
  -9   3   4  815.22   64.39
  -9   3   4  702.53   73.89
  -9   3   4  910.51   65.29
   9   3  -4  822.42   64.79
   9   3  -4  796.42   64.29
   9  -3  -4  836.62   65.29
  -9  -3   4  721.53   69.69
  -9  -3   4  842.82   64.79
  -9  -3   4  897.01   64.49
   7   3  -2  440.76   42.50
   7   3  -2  483.85   36.40
  -7   3   2  477.35   36.40
  -7   3   2  453.35   49.50
  -7   3   2  454.35   37.00
   7   3  -2  409.36   36.70
   7  -3  -2  494.85   36.40
   7  -3  -2  538.95   47.50
   7  -3  -2  438.06   37.20
  -7  -3   2  474.95   36.80
  -7  -3   2  409.96   41.40
  -7  -3   2  507.95   36.40
   5   3   0   51.29    4.50
  -5   3   0   45.50    3.70
   5   3   0   47.80    3.70
  -5   3   0   21.70   17.00
  -5   3   0   42.70    5.10
   5   3   0   43.50    4.60
   5  -3   0   33.70    5.20
  -5  -3   0   42.60   13.80
  -5  -3   0   42.00   13.30
   5  -3   0   46.00    3.70
   5  -3   0   75.19   20.40
  -3   3  -2 1201.88   93.69
   3   3   2 1220.88   93.69
   3   3   2 1206.98   99.79
  -3   3  -2 1321.37  101.89
  -3   3  -2 1206.08  100.99
   3   3   2 1341.87   94.19
   3  -3   2 1203.98   93.79
   3  -3   2 1112.79   94.39
  -3  -3  -2 1204.38  100.09
   3  -3   2 1082.89   94.39
  -3  -3  -2 1131.59   94.09
   1   3   4  415.56   32.10
  -1   3  -4  375.56   32.10
  -1   3  -4  453.05   48.20
   1   3   4  350.66   43.80
  -1   3  -4  417.06   31.30
  -1  -3  -4  358.76   32.00
   1  -3   4  430.36   31.40
   1  -3   4  437.16   32.40
   1  -3   4  391.26   31.40
   1  -3   4  326.67   47.40
   1   3  -6 1081.49   95.09
  -1   3   6 1380.66   94.29
  -1   3   6 1172.68   94.39
   1   3  -6 1377.86  109.39
  -1   3   6 1221.48   95.19
  -1   3   6 1149.98  105.69
   1  -3  -6 1078.09  106.99
  -1  -3   6 1147.49   94.39
   1  -3  -6 1114.89   95.09
  -1  -3   6 1383.56   95.49
  -1  -3   6 1223.38   94.39
   1  -3  -6 1168.58   94.29
   3   3  -8   33.40    5.70
  -3   3   8   28.30    2.90
  -3   3   8   32.90    5.90
  -3   3   8   33.10    2.70
  -3   3   8   39.60   32.90
   3   3  -8   44.40   38.10
   3  -3  -8   37.40    5.60
  -3  -3   8   46.40   37.80
   3  -3  -8   14.00   35.80
  -3  -3   8   31.40    2.90
  -3  -3   8   27.70    3.10
  -5   3  10   89.09   11.70
   5   3 -10  111.39   50.29
  -5   3  10   71.09   44.00
   5   3 -10   76.59   10.40
  -5   3  10   82.89    6.00
  -5   3  10   66.99    6.00
  -5  -3  10   97.09   53.29
   5  -3 -10  110.99   51.49
  -5  -3  10   85.19   11.80
   5  -3 -10   63.99   10.20
  -5  -3  10   70.99    6.30
  -5  -3  10   65.39    6.20
  -7   3  12   16.50    9.20
  -7   3  12   13.90    2.10
   7   3 -12   11.30    6.90
  -7   3  12    2.40   58.49
   7   3 -12  -46.50   65.99
  -7   3  12   11.70    1.80
  -7  -3  12    8.80    1.90
   7  -3 -12  -33.00   73.29
  -7  -3  12    6.00    8.60
   7  -3 -12   10.40    7.70
   9   3 -14  230.28   26.00
  -9   3  14  263.97   20.80
  -9   3  14  265.77   32.40
  -9   3  14  187.18   90.99
  -9   3  14  272.77   20.80
   9  -3 -14  254.47   35.20
  -9  -3  14  275.67   28.60
   9  -3 -14  148.09  108.69
  -9  -3  14  274.47   20.90
  -9  -3  14  254.57   20.90
 -11   3  16   57.79    5.70
 -11   3  16   56.99    5.90
 -11  -3  16   53.29    6.00
 -11  -3  16   63.09    5.90
 -13   3  18   21.30    3.70
 -13   3  18   24.20    3.70
 -13  -3  18   24.50    4.00
 -15  -3  20    3.60    4.10
 -24   4  19    1.70    3.90
 -24  -4  19    9.20    4.30
 -22   4  17    1.40    3.20
 -22  -4  17    2.60    3.50
 -20   4  15  358.06   28.80
 -20   4  15  430.86  124.89
  20  -4 -15  484.05  188.68
 -18   4  13  -16.10   80.19
 -18   4  13   81.29   14.20
  18   4 -13   47.60   10.00
 -18   4  13   49.90    5.10
 -18  -4  13   49.60    9.70
 -18  -4  13   59.69    5.60
  18  -4 -13   34.50   12.30
  18  -4 -13   48.60   97.59
 -16   4  11    2.10    0.90
  16   4 -11    0.50    5.60
 -16   4  11   -6.90   52.39
 -16   4  11   -0.40    1.40
 -16   4  11    4.30    8.50
 -16  -4  11   -5.90    5.70
  16  -4 -11  -21.40   69.99
  16  -4 -11   -3.80    8.10
 -16  -4  11    0.00    1.90
  14   4  -9   17.70    5.10
 -14   4   9   18.50    6.40
 -14   4   9   13.70   38.80
 -14   4   9   12.20    2.00
 -14  -4   9   11.10    2.10
  14  -4  -9   19.20    7.20
 -14  -4   9    2.00   31.90
 -14  -4   9   20.20    6.10
  12   4  -7  128.59   25.40
  12   4  -7  103.39   10.20
 -12   4   7   53.39   33.90
 -12   4   7  133.09   11.80
 -12   4   7  104.09    8.80
  12  -4  -7  102.79   11.80
 -12  -4   7  143.29   27.10
 -12  -4   7   97.99    9.00
  12  -4  -7  176.98   41.10
 -12  -4   7  118.89   10.10
  10   4  -5 1413.16  107.79
 -10   4   5 1504.15  108.29
  10   4  -5 1436.76  107.19
 -10   4   5 1270.07  107.29
 -10   4   5 1314.67  117.49
  10   4  -5 1478.05  112.99
  10  -4  -5 1585.94  119.89
 -10  -4   5 1304.57  107.69
 -10  -4   5 1399.46  107.39
  10  -4  -5 1229.68  108.19
 -10  -4   5 1221.18  112.59
  -8   4   3 1357.46  102.99
  -8   4   3 1398.26  103.69
   8   4  -3 1412.66  102.89
   8   4  -3 1266.07  103.19
  -8   4   3 1259.17  111.69
   8   4  -3 1316.07  114.79
  -8  -4   3 1161.88  106.39
   8  -4  -3 1235.98  103.79
  -8  -4   3 1381.46  103.29
  -8  -4   3 1361.66  102.99
  -6   4   1    6.20    1.00
  -6   4   1   10.30    2.90
   6   4  -1    7.70    0.90
   6   4  -1    9.80    1.80
   6   4  -1    7.80    1.90
  -6   4   1   19.80   17.10
  -6  -4   1    8.50   10.30
  -6  -4   1    7.40   11.30
   6  -4  -1   18.90   19.90
  -6  -4   1    8.70    1.20
  -4   4  -1 1805.52  139.89
  -4   4  -1 1604.54  145.99
   4   4   1 1910.61  140.39
   4   4   1 1747.23  144.49
  -4  -4  -1 1960.20  151.18
  -4  -4  -1 2017.40  139.79
   4  -4   1 1809.02  139.89
   4  -4   1 1681.13  140.59
  -4  -4  -1 1597.24  140.19
   2   4   3   15.80   22.10
  -2   4  -3    3.80   18.50
  -2   4  -3    9.70    1.10
  -2   4  -3    2.50   20.20
   2   4   3   16.80    3.30
   2   4   3    9.70    1.10
  -2  -4  -3    5.60   17.10
   2  -4   3    8.40    3.20
   2  -4   3    6.10    3.10
  -2  -4  -3   12.20    2.60
   2  -4   3    9.50    1.30
   0   4   5    5.90    0.90
   0   4  -5    6.40    1.00
   0   4  -5    7.20    3.10
   0   4   5    5.00    2.80
   0   4   5    0.70   21.60
   0  -4   5    6.00    1.00
   0  -4  -5    4.10    2.90
   0  -4   5   10.60    3.60
   0  -4   5    7.90    1.20
   0  -4   5   -1.70   28.10
   2   4  -7  177.48   15.70
  -2   4   7  164.28   14.20
  -2   4   7  139.79   33.70
  -2   4   7  204.48   16.10
   2   4  -7  159.08   41.00
   2  -4  -7  164.48   15.80
  -2  -4   7  176.08   14.30
   2  -4  -7  189.58   40.10
  -2  -4   7  193.88   14.30
  -2  -4   7  196.78   43.80
  -2  -4   7  189.18   16.50
  -4   4   9  621.14   50.79
  -4   4   9  706.13   49.00
  -4   4   9  605.94   49.00
  -4   4   9  629.04   76.19
   4   4  -9  624.24   80.39
   4   4  -9  568.24   50.29
  -4  -4   9  668.03   49.10
  -4  -4   9  640.34   50.79
   4  -4  -9  656.03   85.79
  -4  -4   9  585.64   85.89
   4  -4  -9  573.44   50.39
  -4  -4   9  621.24   49.10
   6   4 -11  309.77   29.30
  -6   4  11  388.56   30.80
   6   4 -11  511.55   82.09
  -6   4  11  366.96   66.59
  -6   4  11  340.97   27.00
   6  -4 -11  304.57   29.60
  -6  -4  11  353.86   27.00
  -6  -4  11  325.97   31.80
   6  -4 -11  351.86   71.89
  -6  -4  11  235.88   82.99
  -6  -4  11  360.86   27.00
   8   4 -13  326.47   33.10
  -8   4  13  399.96   29.50
  -8   4  13  312.17   84.69
  -8   4  13  441.06   35.80
  -8   4  13  368.66   29.50
   8  -4 -13  344.87   33.70
   8  -4 -13  433.66  145.89
  -8  -4  13  389.66   34.70
  -8  -4  13  377.76   29.60
  -8  -4  13  362.26   29.60
 -10   4  15   16.00    2.80
 -10   4  15   26.60    3.50
 -10   4  15  -18.10  160.78
  10  -4 -15   91.19  158.98
 -10  -4  15   22.80    3.00
 -10  -4  15   28.00    4.00
 -12   4  17   39.40    5.00
 -12   4  17   40.50    4.90
 -12  -4  17   37.10    5.00
 -12  -4  17   29.90    5.00
 -14  -4  19   40.50    6.50
 -16  -4  21    2.40    4.80
 -25   5  20    4.20    4.60
 -23   5  18   69.89    8.40
 -23  -5  18   82.19    9.00
 -21   5  16  150.48   12.40
 -21  -5  16  137.69   12.60
 -19   5  14  -10.20   14.70
 -19   5  14   71.69  103.29
  19  -5 -14  141.09  133.89
  19  -5 -14   20.20   14.40
 -17   5  12  286.97   23.60
 -17   5  12  206.38   77.09
  17   5 -12  304.67   26.60
 -17   5  12  308.37   23.40
  17  -5 -12  307.07   29.20
 -17  -5  12  275.37   23.80
  17  -5 -12  392.56  100.69
 -17  -5  12  312.27   26.60
 -15   5  10  149.69   11.70
 -15   5  10  101.39   54.89
  15   5 -10  143.49   14.30
 -15   5  10  157.48   17.10
 -15   5  10  135.89   11.90
  15  -5 -10  155.78   16.90
 -15  -5  10  160.08   14.40
 -15  -5  10  145.89   12.20
 -15  -5  10  113.09   45.50
  15  -5 -10  111.99   64.19
 -13   5   8   41.30    3.80
  13   5  -8   44.90    6.60
 -13   5   8   60.79   38.30
  13   5  -8   38.50   26.10
 -13   5   8   51.49    9.50
 -13  -5   8   48.40    6.20
  13  -5  -8   43.40    7.90
 -13  -5   8   19.80   28.10
  13  -5  -8   40.10   47.30
 -13  -5   8   38.20    4.30
  11   5  -6  702.53   57.29
 -11   5   6  587.74   47.60
 -11   5   6  531.05   66.39
  11   5  -6  545.35   48.10
  11   5  -6  677.33   47.50
 -11   5   6  604.44   48.90
  11   5  -6  652.23   47.50
 -11  -5   6  581.44   48.10
 -11  -5   6  592.24   47.80
 -11  -5   6  575.24   57.99
  11  -5  -6  603.04   49.10
  11  -5  -6  655.83   71.99
   9   5  -4   95.49    8.60
  -9   5   4  112.79    8.10
  -9   5   4   67.29   27.20
   9   5  -4  106.29    8.00
   9   5  -4   90.59   16.90
  -9   5   4  116.49   10.10
  -9  -5   4   89.19   16.70
  -9  -5   4   92.99    8.60
   9  -5  -4   98.19   10.10
  -9  -5   4   88.89    8.20
  -7   5   2 1749.03  126.59
   7   5  -2 1403.36  125.89
   7   5  -2 1638.14  125.69
   7   5  -2 1687.43  125.99
  -7   5   2 1508.85  133.89
   7  -5  -2 1516.05  126.59
  -7  -5   2 1549.74  128.89
  -7  -5   2 1692.23  125.79
   7  -5  -2 1766.52  135.29
   5   5   0 2002.90  145.49
  -5   5   0 2052.09  145.99
  -5   5   0 1566.04  151.88
   5   5   0 1965.80  145.49
  -5   5   0 1818.62  145.19
   5   5   0 1846.42  145.19
   5  -5   0 1824.92  145.29
   5  -5   0 1730.83  145.99
  -5  -5   0 1740.13  148.79
   5  -5   0 2123.79  155.18
  -5  -5   0 1595.14  148.59
  -5  -5   0 2043.60  145.19
  -3   5  -2    7.90   19.50
   3   5   2    0.40    1.90
  -3   5  -2    3.70   21.10
   3   5   2    1.40    0.50
   3   5   2    0.70    0.40
   3   5   2    0.60    0.50
  -3   5  -2    2.10    0.60
   3   5   2   -0.90   15.20
  -3  -5  -2   -2.60   16.00
   3  -5   2    2.50    3.00
   1   5   4    2.80   19.90
   1   5   4    5.40    2.70
   1   5   4    9.80    1.00
  -1   5  -4   10.60    1.20
   1   5   4    8.10    1.20
  -1   5  -4   -1.80   26.70
  -1   5  -4   15.30   21.20
  -1  -5  -4   -7.00   20.80
   1  -5   4    7.90    1.50
  -1  -5  -4    5.20    2.70
   1  -5   4    9.20    1.60
   1  -5   4   11.40    4.00
  -1   5   6  150.08   12.50
  -1   5   6  146.59   32.30
   1   5  -6  226.58   39.50
   1   5  -6  160.38   14.30
  -1   5   6  178.88   14.30
  -1   5   6  160.18   12.60
   1   5  -6  160.88   12.60
  -1  -5   6  161.18   12.70
   1  -5  -6  146.39   14.00
  -1  -5   6  165.68   12.70
   1  -5  -6  154.38   12.50
  -1  -5   6  117.59   38.80
  -3   5   8  349.47   27.60
  -3   5   8  257.77   47.30
   3   5  -8  306.07   27.20
   3   5  -8  485.35   64.69
  -3   5   8  324.37   25.60
  -3  -5   8  331.77   25.70
   3  -5  -8  324.47   27.20
  -3  -5   8  249.28   57.09
  -3  -5   8  323.07   27.70
  -3  -5   8  337.67   25.70
   3  -5  -8  278.37   52.59
  -5   5  10 1193.48  131.49
  -5   5  10 1580.64  110.99
  -5   5  10 1378.36  109.09
  -5   5  10 1602.94  109.09
   5   5 -10 1237.58  110.29
  -5  -5  10 1391.16  109.19
   5  -5 -10 1190.28  110.39
   5  -5 -10 1470.45  144.19
  -5  -5  10 1493.15  110.89
  -5  -5  10 1379.06  109.19
   7   5 -12   57.19   12.50
  -7   5  12   81.19   12.90
  -7   5  12   42.30   67.09
  -7   5  12   69.89    6.20
  -7  -5  12   69.69    6.40
  -7  -5  12   96.89   17.20
   7  -5 -12  151.28   82.79
  -7  -5  12   74.89    6.30
  -9   5  14  125.99   95.39
  -9   5  14  161.98   14.50
  -9   5  14  199.98   14.50
  -9  -5  14  182.98   14.60
  -9  -5  14  174.98   14.70
   9  -5 -14  209.18  122.39
 -11   5  16   41.90    4.80
 -11  -5  16   41.90    5.40
 -13  -5  18    1.30    3.40
 -24   6  19   28.50    5.00
 -24  -6  19   25.60    5.90
 -22   6  17   26.30    4.20
 -22  -6  17   13.50    4.40
 -20   6  15   52.39    6.00
 -20   6  15   63.89    5.20
 -20  -6  15   43.60    6.60
 -18   6  13   73.39    6.00
 -18   6  13   71.39    6.60
 -18   6  13   75.69   94.49
 -18   6  13   89.19   15.90
  18  -6 -13  162.08  120.29
  18  -6 -13   61.19   15.30
 -18  -6  13   63.09    7.10
 -16   6  11  153.28   18.20
  16   6 -11  144.89   14.60
 -16   6  11  134.69   10.70
 -16   6  11  117.99   11.00
 -16   6  11   50.69   65.69
 -16  -6  11  153.38   14.40
 -16  -6  11  128.59   11.40
  16  -6 -11  134.19   18.40
  16  -6 -11  250.77  140.69
  14   6  -9    7.80   31.10
  14   6  -9    9.70    4.40
 -14   6   9    0.30    7.30
 -14   6   9  -23.20   47.40
 -14  -6   9    6.70    2.40
 -14  -6   9    6.20    3.80
  14  -6  -9   15.30    7.70
  14  -6  -9  -35.80   56.99
 -14  -6   9    9.40   35.90
  12   6  -7  159.28   11.00
  12   6  -7  209.28   33.30
 -12   6   7  131.39   11.20
  12   6  -7  153.78   12.20
 -12   6   7  142.39   41.70
 -12   6   7  124.69   14.50
  12  -6  -7  120.39   14.40
  12  -6  -7  176.98   47.50
 -12  -6   7  146.19   29.50
 -12  -6   7  132.09   12.00
 -12  -6   7  132.49   11.50
 -10   6   5   18.80    4.80
  10   6  -5   11.00    1.30
  10   6  -5   13.40    2.40
  10   6  -5   17.70   15.30
 -10   6   5   16.50   29.40
 -10   6   5   13.20    1.70
 -10  -6   5   15.60   15.70
  10  -6  -5   13.80    5.10
  10  -6  -5  -16.40   57.19
 -10  -6   5    7.60    2.40
   8   6  -3 2074.59  158.08
   8   6  -3 1753.22  158.18
   8   6  -3 2098.99  157.98
  -8   6   3 2068.19  167.68
  -8   6   3 2120.99  158.88
  -8   6   3 1976.00  157.98
   8  -6  -3 1995.40  158.98
  -8  -6   3 2040.00  159.78
  -8  -6   3 1924.71  160.28
   8  -6  -3 2253.57  169.58
  -8  -6   3 2018.70  158.08
   6   6  -1  140.59   10.70
  -6   6   1  162.68   27.50
  -6   6   1  133.59   10.60
   6   6  -1  129.09   10.70
  -6   6   1  135.09   11.90
  -6  -6   1   98.39   16.10
  -6  -6   1  145.09   10.60
  -6  -6   1  136.99   17.60
   6  -6  -1  122.39   12.20
   4   6   1 1004.90   76.49
  -4   6  -1  976.80   85.59
  -4   6  -1 1002.60   76.19
   4   6   1  936.11   76.19
  -4  -6  -1  983.90   81.29
  -4  -6  -1 1082.69   76.19
   4  -6   1  962.90   76.29
   4  -6   1  852.11   76.99
  -2   6  -3    1.60   26.30
   2   6   3    2.50    0.70
   2   6   3    7.30   19.10
   2   6   3    1.60    0.70
  -2   6  -3   19.10   23.20
   2   6   3    1.10    0.50
  -2   6  -3    1.20    0.70
   2   6   3    1.80    2.20
   2  -6   3   -1.20    3.50
   2  -6   3    1.40    0.90
   2  -6   3    0.10    0.80
  -2  -6  -3  -16.90   18.10
   2  -6   3    0.90    3.40
   0   6   5  533.35   45.30
   0   6  -5  549.54   45.40
   0   6   5  555.94   60.79
   0   6   5  571.74   45.40
   0   6   5  655.63   46.40
   0   6  -5  691.03   70.19
   0   6   5  645.74   45.30
   0   6  -5  552.14   62.89
   0  -6  -5  532.85   46.20
   0  -6  -5  638.74   64.59
   0  -6   5  554.94   45.50
   0  -6   5  606.74   46.70
   0  -6   5  550.34   45.50
   2   6  -7  453.35   37.40
   2   6  -7  493.65   36.00
  -2   6   7  458.65   36.00
  -2   6   7  453.05   58.99
   2   6  -7  482.35   69.19
  -2   6   7  521.85   37.40
  -2  -6   7  435.96   36.00
  -2  -6   7  469.05   37.60
  -2  -6   7  387.16   63.79
  -2  -6   7  430.66   36.00
   2  -6  -7  423.16   37.10
   2  -6  -7  456.95   65.49
  -4   6   9  181.78   14.50
   4   6  -9  164.78   17.00
   4   6  -9  246.58   55.39
  -4   6   9  138.19   46.60
  -4   6   9  189.38   23.80
  -4  -6   9  156.38   66.29
  -4  -6   9  189.28   14.70
  -4  -6   9  191.78   14.60
   4  -6  -9  134.39   54.29
  -6   6  11   39.90   99.19
   6   6 -11   49.10    8.50
  -6   6  11   62.59   11.20
  -6   6  11   37.30    3.80
   6  -6 -11   16.30   71.29
  -6  -6  11   45.10    4.10
   6  -6 -11   26.30    8.70
  -6  -6  11   37.80    4.20
  -8   6  13  357.06   92.29
  -8   6  13  450.05   33.50
   8   6 -13  353.26   38.80
  -8   6  13  419.66   33.50
  -8  -6  13  446.36   40.10
  -8  -6  13  482.75   33.60
   8  -6 -13  402.56  113.99
  -8  -6  13  394.36   33.70
 -10   6  15    7.40    2.30
 -10   6  15    6.70    2.20
 -10  -6  15    9.50    2.70
 -12  -6  17   18.20    3.80
 -14   6  19    3.20    3.60
 -14  -6  19    0.40    4.00
 -23   7  18   45.80    7.30
 -23  -7  18   63.59    8.10
 -21   7  16   47.20    5.90
 -21  -7  16   44.80    7.10
 -19   7  14   61.69    5.30
 -19   7  14   51.99    5.80
 -19  -7  14   59.19    6.90
 -17   7  12   41.50    4.70
 -17   7  12   44.70    4.00
 -17   7  12   80.69  135.19
  17   7 -12   49.60   15.40
 -17  -7  12   45.10    5.70
  17  -7 -12  131.99  114.39
 -15   7  10   84.59    7.30
 -15   7  10  124.79   63.39
 -15   7  10  115.19   15.90
  15  -7 -10  129.99   79.99
  15  -7 -10   74.49   15.10
 -15  -7  10   80.69    7.80
  13   7  -8  368.46   29.80
 -13   7   8  273.87   58.89
 -13   7   8  402.36   31.40
  13   7  -8  363.76   49.10
  13   7  -8  375.56   28.30
  13  -7  -8  340.67   31.20
 -13  -7   8  316.47   55.89
  13  -7  -8  528.15   71.69
 -13  -7   8  327.07   28.70
  11   7  -6  164.68   12.90
  11   7  -6  164.48   12.20
 -11   7   6  188.68   41.40
  11   7  -6  121.09   22.60
 -11   7   6  139.99   12.30
 -11   7   6  168.48   15.50
  11  -7  -6  164.28   15.50
  11  -7  -6  254.17   56.09
 -11  -7   6  139.59   12.60
 -11  -7   6  150.88   12.90
 -11  -7   6  153.78   26.20
  -9   7   4  -20.60   28.40
  -9   7   4    4.90    1.10
  -9   7   4    8.80    4.40
   9   7  -4    6.90    1.00
   9  -7  -4   17.70   34.40
  -9  -7   4    5.20    1.40
   9  -7  -4    0.50    4.50
  -7   7   2   56.69   28.70
  -7   7   2   91.99    9.90
   7   7  -2  104.29    8.00
  -7   7   2   95.19    8.00
   7  -7  -2   96.69   10.50
  -7  -7   2  109.69    8.10
   5   7   0   53.79    4.70
   5   7   0   54.59    4.70
   5   7   0   63.09    5.10
  -5   7   0   55.09   25.30
  -5   7   0   60.19    4.80
   5   7   0   54.39    5.00
  -5  -7   0   46.80    9.80
  -5  -7   0   49.90   10.90
   5  -7   0   52.99   29.50
  -5  -7   0   65.89    4.80
   5  -7   0   62.59    7.60
  -3   7  -2 1224.18   92.49
   3   7   2 1216.58   92.79
  -3   7  -2 1176.38  103.49
   3   7   2 1162.48   92.39
   3   7   2 1192.68   99.19
   3   7   2 1091.29   92.39
  -3  -7  -2 1135.89   92.79
   3  -7   2 1072.69   93.39
   3  -7   2 1239.58   92.49
   3  -7   2 1216.88   93.49
  -3  -7  -2 1317.77   98.89
  -1   7  -4   -6.70   31.90
   1   7   4   11.70    3.20
   1   7   4   25.20   24.00
  -1   7  -4   12.80    1.60
  -1   7  -4   66.39   29.30
   1   7   4   12.80    1.50
   1  -7   4   15.00    1.90
  -1  -7  -4  -11.40   23.40
   1  -7   4   12.10    1.80
   1  -7   4   12.70    4.50
   1  -7   4    8.20    4.40
  -1  -7  -4   18.90    3.30
   1   7  -6   70.39    5.80
   1   7  -6   60.49   41.40
  -1   7   6   25.70   36.70
  -1   7   6   70.79    5.80
   1   7  -6   62.99   33.70
  -1   7   6   80.29    8.80
   1  -7  -6   37.70   35.70
   1  -7  -6   64.79    8.30
  -1  -7   6   69.99    6.00
  -1  -7   6   66.99    9.60
  -1  -7   6   76.29    6.00
   3   7  -8  432.76   33.30
  -3   7   8  451.15   66.39
   3   7  -8  420.96   35.30
   3   7  -8  531.55   80.09
  -3   7   8  461.15   35.40
  -3   7   8  441.36   33.20
  -3   7   8  392.56   33.30
  -3  -7   8  401.56   33.30
  -3  -7   8  429.16   33.40
  -3  -7   8  342.07   71.09
   3  -7  -8  574.84   77.99
   3  -7  -8  369.16   34.80
  -3  -7   8  452.85   35.60
   5   7 -10  121.29   17.50
  -5   7  10  124.29    9.80
  -5   7  10  218.78   57.69
  -5  -7  10  123.19    9.90
   5  -7 -10  111.09   67.69
  -5  -7  10  146.89   15.80
  -5  -7  10  105.99   10.00
   5  -7 -10  108.39   15.40
  -7   7  12   94.29    7.90
  -7   7  12   73.09   90.89
   7   7 -12   65.99   14.90
  -7   7  12  107.69    7.80
  -7  -7  12   90.89   17.10
  -7  -7  12   87.39    8.00
   7  -7 -12   24.30   92.49
  -7  -7  12   92.79    8.20
  -9   7  14   36.10    4.40
  -9   7  14   41.10    4.40
  -9  -7  14   45.50    4.70
  -9  -7  14   43.40    5.20
 -11  -7  16    4.20    3.10
 -11  -7  16    0.80    2.80
 -13   7  18  189.38   15.10
 -13  -7  18  168.88   15.50
 -15  -7  20    7.70    5.40
 -22   8  17   37.70    5.10
 -20   8  15   32.20    5.10
 -20   8  15   30.70    4.00
 -20  -8  15   30.60    5.00
 -18   8  13   89.89    8.00
 -18   8  13   90.79    7.60
 -18  -8  13   89.79   12.10
 -16   8  11  488.35   38.20
  16   8 -11  479.25   40.20
 -16   8  11  501.35   38.40
 -16   8  11  495.65   95.09
  16  -8 -11  588.34  122.19
 -16  -8  11  469.55   38.70
 -16  -8  11  491.25   39.70
  14   8  -9   82.89    6.10
  14   8  -9   77.09    9.40
 -14   8   9   77.39    6.60
 -14   8   9   94.79   59.59
 -14   8   9   90.39   15.40
 -14  -8   9   69.89    8.50
 -14  -8   9   66.39    7.10
  14  -8  -9   72.49   71.79
  14  -8  -9   55.59   11.70
  12   8  -7  365.26   26.80
 -12   8   7  327.07   27.00
 -12   8   7  247.78   57.19
  12   8  -7  389.96   27.50
  12   8  -7  404.66   40.40
 -12   8   7  394.86   30.10
  12  -8  -7  316.47   30.90
  12  -8  -7  552.24   84.89
 -12  -8   7  300.67   50.99
 -12  -8   7  296.97   27.20
 -12  -8   7  301.57   27.30
  10   8  -5  614.64   46.30
 -10   8   5  597.64   46.50
 -10   8   5  523.25   72.69
 -10   8   5  627.94   48.10
 -10  -8   5  582.64   46.60
  10  -8  -5  558.74   48.20
  -8   8   3   10.90    4.60
   8   8  -3   16.30    1.60
  -8   8   3   16.10   30.80
  -8  -8   3   11.20    1.80
   8  -8  -3   11.30    5.30
  -6   8   1  213.08   37.60
   6   8  -1  198.08   16.70
  -6   8   1  204.48   16.80
  -6   8   1  221.68   18.30
   6  -8  -1  233.18   42.60
  -6  -8   1  231.78   16.80
   6  -8  -1  204.68   18.70
   4   8   1   14.90    2.80
  -4   8  -1    6.00   25.40
   4   8   1   13.20    1.50
   4   8   1   16.30    2.50
  -4   8  -1   13.00    1.60
   4   8   1   14.10    1.60
  -4   8  -1   30.80   30.00
   4  -8   1   10.80    4.60
  -4  -8  -1   12.00   14.70
   4  -8   1    8.40    4.30
   2   8   3  337.77   30.30
   2   8   3  419.36   47.00
  -2   8  -3  430.56   53.29
   2   8   3  391.96   30.40
  -2   8  -3  517.65   61.59
  -2   8  -3  408.56   30.40
   2   8   3  414.86   31.00
  -2  -8  -3  370.46   31.00
   2  -8   3  331.57   31.80
   2  -8   3  431.26   32.10
  -2  -8  -3  351.96   47.20
   0   8  -5 1312.47  102.09
   0   8   5 1300.37  116.19
   0   8   5 1104.89  101.99
   0   8  -5 1486.25  120.39
   0   8   5 1353.86  102.09
   0  -8  -5 1411.96  117.79
   0  -8   5 1340.17  102.19
   0  -8   5 1303.67  102.29
   0  -8  -5 1198.98  102.79
   0  -8   5 1380.26  103.69
  -2   8   7   93.99    7.90
   2   8  -7  114.79    8.40
  -2   8   7   96.89   11.70
  -2   8   7  100.49   42.30
  -2   8   7  101.49    7.80
   2   8  -7   29.50   44.00
   2   8  -7   87.29   51.19
  -2  -8   7   95.89   12.40
  -2  -8   7   94.99    9.10
  -2  -8   7   88.89    8.00
   2  -8  -7  124.19   48.90
   2  -8  -7   89.19   10.90
  -4   8   9   62.59    5.20
  -4   8   9    9.20   50.79
   4   8  -9   56.09    5.20
  -4  -8   9   63.69    5.30
   4  -8  -9   72.49   64.49
  -4  -8   9   55.59    5.60
  -4  -8   9   64.79   12.70
   6   8 -11   69.49    5.80
  -6   8  11   61.99    5.80
  -6   8  11  103.19   68.79
  -6   8  11   71.49    5.80
   6   8 -11   81.79   14.60
  -6  -8  11   61.79    6.20
  -6  -8  11   66.19    6.30
   6  -8 -11   -0.70   86.19
  -6  -8  11   73.79   15.30
  -8   8  13   -1.20    1.70
  -8   8  13    2.60    1.80
  -8  -8  13   -1.60    2.50
  -8  -8  13    1.20    2.10
 -10   8  15  393.86   31.80
 -10  -8  15  401.36   31.80
 -12   8  17   20.10    3.50
 -12  -8  17   22.10    4.40
 -14   8  19    5.00    3.90
 -14  -8  19    2.90    4.60
 -23   9  18   37.70    5.70
 -21   9  16    6.90    3.50
 -21  -9  16    9.00    4.80
 -19   9  14   51.29    4.60
 -19   9  14   40.90    5.40
 -19  -9  14   33.40    5.60
 -17   9  12   42.50    4.60
 -17   9  12   56.69    5.20
 -17  -9  12   44.90    6.80
 -15   9  10   11.90   84.99
 -15   9  10   55.49    5.30
 -15  -9  10   50.69    6.20
  15  -9 -10  172.78  112.09
 -13   9   8  251.17   20.80
  13   9  -8  298.17   21.90
 -13   9   8  211.18   64.29
  13  -9  -8  397.96   82.19
 -13  -9   8  236.18   21.10
 -11   9   6   23.50   44.90
 -11   9   6    2.30    7.10
 -11  -9   6    0.80    2.00
  11  -9  -6   28.60   54.69
  11  -9  -6    7.40    6.90
  -9   9   4   62.09   38.10
  -9   9   4   59.79    9.80
   9   9  -4   58.69    4.80
  -9   9   4   53.89    5.10
   9  -9  -4   45.20    9.90
   9  -9  -4   49.60   46.00
  -9  -9   4   66.89    5.40
   7   9  -2   57.39    5.30
   7   9  -2   67.29    5.30
  -7   9   2   28.70   35.40
  -7   9   2   66.09    9.00
  -7   9   2   62.29    5.40
   7  -9  -2   26.10   42.10
   7  -9  -2   62.99   11.80
  -7  -9   2   75.29    5.60
  -5   9   0    2.80   30.80
  -5   9   0    6.00    1.10
   5  -9   0    4.70    4.70
   3   9   2  812.62   65.49
  -3   9  -2  842.02   65.59
  -3   9  -2  858.71   83.69
   3   9   2  737.83   65.49
   3   9   2  853.91   73.89
   3   9   2  955.80   65.89
   3  -9   2  875.91   66.99
  -3  -9  -2  881.11   73.09
  -3  -9  -2  759.22   65.79
   1   9   4   50.79    6.80
   1   9   4   49.40    3.90
  -1   9  -4   58.69   44.90
   1   9   4   43.90    3.80
   1   9   4    3.80   37.30
  -1   9  -4   41.80    3.90
  -1   9  -4   54.59   35.80
   1  -9   4   38.30    7.50
   1  -9   4   55.29    9.20
   1  -9   4   46.80    4.50
  -1  -9  -4   78.69   31.50
  -1  -9  -4   45.20    6.30
   1   9  -6   52.89    4.60
  -1   9   6   55.09    4.50
  -1   9   6   56.19    4.70
   1   9  -6  102.09   45.30
  -1   9   6   31.60   38.60
  -1  -9   6   58.79    5.10
   1  -9  -6   87.09   46.30
   1  -9  -6   45.30    8.00
  -1  -9   6   47.40    9.00
  -1  -9   6   54.79   10.50
  -3   9   8  201.08   16.10
  -3   9   8  122.19   55.79
   3   9  -8  207.58   60.69
   3   9  -8  207.78   16.10
  -3   9   8  203.68   16.00
  -3  -9   8  202.08   16.30
  -3  -9   8  200.78   20.40
   3  -9  -8  214.78   64.79
   5   9 -10    1.90    1.40
  -5   9  10    5.90    1.50
  -5   9  10    2.90    1.40
  -5   9  10   29.90   65.29
  -5  -9  10    3.30    2.20
  -5  -9  10    1.60    9.00
   5  -9 -10   32.10   80.79
  -7   9  12    3.60    1.80
  -7   9  12    3.20    1.80
   7   9 -12    6.70    1.80
  -7  -9  12    7.40    2.60
  -9   9  14    6.10    2.20
   9   9 -14    1.80    2.00
  -9  -9  14    4.90    3.00
 -11   9  16    2.30    2.70
  11   9 -16    2.60    2.40
 -11  -9  16   -0.80    3.60
  13   9 -18   69.69    6.70
 -13   9  18   52.69    7.00
 -13  -9  18   51.89    8.50
 -22  10  17    2.30    4.20
 -22 -10  17    5.00    8.60
 -20  10  15   17.00    3.80
 -20  10  15    8.40    2.70
 -20 -10  15   20.20    5.40
 -18  10  13   18.10    2.50
 -18  10  13   17.30    3.20
 -18 -10  13   11.70    4.50
 -16  10  11    2.70    2.20
 -16  10  11    5.00    1.70
 -16 -10  11    4.30    3.90
 -14  10   9    3.20    2.00
  14  10  -9    1.30    1.20
 -14 -10   9    1.50    3.00
  12  10  -7   95.89    7.40
 -12  10   7   90.99    7.70
 -12  10   7   17.90   58.99
  12 -10  -7   74.89   75.19
 -12 -10   7   84.29    8.20
  10  10  -5   47.50    4.10
 -10  10   5   62.79   48.90
 -10  10   5   50.19    4.50
  10 -10  -5   33.10   58.19
 -10 -10   5   46.70    5.50
  -8  10   3    9.90    1.60
   8  10  -3   10.90    1.50
   8  10  -3   14.00    1.70
  -8  10   3   33.70   40.80
  -8 -10   3   11.30    2.00
   8 -10  -3  -19.20   53.39
   8 -10  -3    8.50    6.60
   6  10  -1    1.40    0.90
  -6  10   1    2.10    1.10
   6  10  -1    2.10    1.00
  -6  10   1  -17.80   38.30
  -6  10   1   -1.10    5.20
   6 -10  -1    7.70   48.30
  -6 -10   1    2.00    1.40
   6 -10  -1   -0.30    5.30
   4  10   1    2.10    1.00
  -4  10  -1   17.60   35.70
  -4  10  -1    4.90    1.20
  -4  10  -1   -1.30   43.00
   4 -10   1   -0.80    5.10
   4 -10   1    3.90    6.00
   2  10   3   24.40    2.50
  -2  10  -3   31.20    2.70
   2  10   3   28.60    5.50
  -2  10  -3   23.70   37.50
   2  10   3   26.10    2.60
   2  10   3   48.90   26.80
   2 -10   3   20.50    6.80
  -2 -10  -3   20.50   27.50
   2 -10   3   21.50    6.40
  -2 -10  -3   26.80    4.10
   0  10  -5  216.48   49.90
   0  10   5  177.58   14.90
   0  10   5  185.08   14.80
   0  10  -5  188.08   14.90
   0 -10  -5  174.18   46.80
   0 -10   5  216.58   18.50
   0 -10   5  181.08   15.10
   2  10  -7    5.60    1.40
  -2  10   7   20.00   51.99
   2  10  -7   44.10   54.19
  -2  10   7    4.90    1.30
  -2  10   7    5.50    1.20
  -2 -10   7    9.70    2.20
   2 -10  -7  -16.70   60.49
  -2 -10   7    7.10    7.70
   4  10  -9  -21.50   71.69
  -4  10   9  -38.00   63.39
   4 -10  -9   29.40   84.09
  -4 -10   9    7.30    2.40
  -4 -10   9   12.00    9.70
  -6  10  11    1.20    1.70
  -6  10  11   -1.20    1.60
   6  10 -11    1.40    1.60
  -6 -10  11    3.00    2.70
   8  10 -13   21.10    3.40
  -8  10  13   24.70    3.60
  -8 -10  13   21.80    3.80
  10  10 -15    3.80    2.40
 -10  10  15    8.50    2.60
 -10 -10  15    8.00    3.80
  12  10 -17    4.30    3.00
 -12  10  17    6.90    3.30
 -12 -10  17    4.30    4.40
 -21  11  16    6.90    4.00
 -21  11  16    3.30    3.80
 -21 -11  16   11.20    6.20
 -19  11  14    5.70    3.40
 -19  11  14    5.30    2.50
 -19 -11  14    7.70    5.00
 -17  11  12   93.79    8.70
 -17 -11  12   98.49   10.10
 -15  11  10   88.39    7.60
 -15 -11  10   74.29    8.80
 -13  11   8  420.56   33.40
  13  11  -8  432.56   33.20
 -13 -11   8  415.56   33.80
  11  11  -6    0.80    1.10
 -11  11   6  -30.30   80.19
 -11  11   6   -0.70    1.60
  11 -11  -6    0.00   75.29
 -11 -11   6   -0.60    2.30
  -9  11   4    1.40    1.50
   9  11  -4    3.50    1.20
   9  11  -4    4.60    1.40
  -9  11   4  -16.30   47.90
  -9 -11   4    6.20    2.10
   9 -11  -4    2.30   73.69
   7  11  -2  320.77   27.60
  -7  11   2  287.87   55.09
  -7  11   2  355.46   27.70
   7  11  -2  372.06   27.60
   7 -11  -2  434.56   74.69
  -7 -11   2  358.96   27.70
  -5  11   0  200.28   49.00
   5  11   0  200.28   16.90
   5  11   0  231.48   16.90
  -5  11   0  215.68   17.00
   5 -11   0  207.48   20.80
   3  11   2  285.57   24.60
   3  11   2  310.37   24.70
  -3  11  -2  306.27   24.70
  -3  11  -2  356.36   54.49
   3 -11   2  360.16   27.80
   1  11   4   38.60    3.60
   1  11   4   43.70    3.70
  -1  11  -4   37.70    3.80
   1  11   4   28.40   35.10
   1 -11   4   41.70    8.60
  -1 -11  -4   19.70   38.30
  -1  11   6   11.60    1.60
  -1  11   6   10.80    1.70
  -1  11   6    4.30   49.70
   1  11  -6   15.80    2.20
  -1 -11   6    8.80    7.80
  -1 -11   6   14.10    2.50
   1 -11  -6   -8.30   56.39
  -3  11   8  212.88   16.90
   3  11  -8  214.18   16.90
  -3  11   8  222.88   16.70
   3  11  -8  218.18   74.89
   3 -11  -8  211.58   85.39
  -3 -11   8  203.28   17.20
  -3 -11   8  182.98   27.20
   5  11 -10   27.70    3.90
  -5  11  10   25.90    3.60
  -5  11  10   27.80    3.30
  -5 -11  10   30.20    4.50
  -7  11  12  130.69   10.80
   7  11 -12  129.29   10.70
  -7 -11  12  127.69   11.40
   9  11 -14    7.10    2.40
  -9  11  14    3.60    2.50
  -9 -11  14    3.10    3.80
 -11  11  16   10.60    3.80
  11  11 -16    7.10    2.90
 -11 -11  16    6.60    4.60
 -20  12  15   28.50    5.00
 -20  12  15   34.80    5.30
 -20 -12  15   29.70    7.30
 -18  12  13    3.00    3.20
 -18  12  13    5.00    2.50
 -18 -12  13    4.50    5.20
 -16  12  11  229.48   18.60
 -16  12  11  236.48   18.30
 -16 -12  11  215.58   19.60
 -14  12   9    6.90    3.80
  14  12  -9    9.40    1.80
 -12  12   7  112.79    9.60
  12  12  -7  118.39    9.30
 -12 -12   7  110.09   10.40
  10  12  -5  281.77   23.10
 -10  12   5  298.17   23.20
  10  12  -5  292.27   23.00
 -10 -12   5  295.07   23.40
  -8  12   3   85.19    7.70
   8  12  -3   96.09    7.40
  -8  12   3   71.19   53.99
   8  12  -3   90.19    7.50
  -8 -12   3   89.89    7.90
   8 -12  -3   47.20   76.89
  -6  12   1  200.88   55.19
  -6  12   1  190.78   14.90
   6  12  -1  178.48   14.80
  -6 -12   1  190.48   15.00
  -4  12  -1   51.69    4.70
   4  12   1   55.79    4.60
  -4  12  -1    9.20   47.70
   4  12   1   51.59    4.60
   4 -12   1   42.20    9.60
   2  12   3   73.39    6.00
  -2  12  -3  119.09   52.49
   2  12   3   69.99    6.10
  -2  12  -3   70.39    6.10
   2 -12   3   78.59   13.50
   0  12   5  965.50   74.79
   0  12   5  897.71   74.79
   0  12  -5  939.01   74.89
   0  12   5  984.90  104.99
   0 -12   5  991.80   76.79
   0 -12  -5 1034.30  110.09
   2  12  -7   13.30    2.10
  -2  12   7   13.90    1.90
   2  12  -7  -13.60   71.19
  -2  12   7   11.70    1.90
  -2  12   7   -2.20   76.19
   2 -12  -7   13.00   85.79
  -2 -12   7   13.30    2.90
  -2 -12   7   13.60    9.50
   4  12  -9    5.10    1.90
  -4  12   9    8.80    1.90
  -4  12   9    7.50    1.90
  -4 -12   9    6.20    3.10
   6  12 -11   26.10    3.40
  -6  12  11   24.90    3.50
  -6 -12  11   18.20    4.00
  -8  12  13    1.60    2.40
   8  12 -13    0.70    2.20
  -8 -12  13    6.70    3.80
  10  12 -15  177.48   13.30
 -10  12  15  127.99   14.20
 -10 -12  15  163.58   14.60
 -19  13  14   23.70    4.60
 -19  13  14   21.50    4.20
 -19 -13  14   13.50    6.80
 -17  13  12   19.60    3.80
 -17  13  12   13.80    2.90
 -17 -13  12   26.70    5.90
 -15  13  10    2.90    2.90
 -15  13  10    7.80    2.30
 -15 -13  10   12.50    4.90
 -13  13   8   44.30    5.30
  13  13  -8   48.80    5.00
  13  13  -8   45.00    4.50
 -13 -13   8   45.00    6.90
 -11  13   6   96.99    8.20
  11  13  -6   84.89    8.00
  11  13  -6   94.49    7.70
 -11 -13   6   96.89    9.00
   9  13  -4    1.70    1.40
  -9  13   4    1.20    1.90
   9  13  -4    1.60    1.60
  -9 -13   4    7.10    2.70
   7  13  -2   52.49    5.10
  -7  13   2   55.59    5.30
   7  13  -2   60.99    5.00
  -7 -13   2   60.49    5.70
  -5  13   0   87.29    7.20
   5  13   0   86.59    7.00
   5  13   0   77.69    7.00
  -5  13   0  -15.00   55.49
   5 -13   0   91.29   16.00
  -3  13  -2   79.79   56.29
   3  13   2  100.89    8.10
   3  13   2   95.89    8.10
  -3  13  -2   93.59    8.20
   3 -13   2  121.89   16.80
  -1  13  -4    0.30    1.60
   1  13   4    5.80    1.60
   1  13   4    5.50    1.60
  -1  13  -4   30.10   60.49
   1 -13   4    3.10    9.00
  -1  13   6   28.70   63.89
  -1  13   6   28.20    3.20
  -1  13   6   20.90    3.20
   1 -13  -6   19.30   67.29
  -3  13   8    9.20    2.00
   3  13  -8    6.90    2.10
  -3 -13   8   13.50    3.40
   5  13 -10  175.88   13.30
  -5  13  10  153.98   13.30
  -5 -13  10  154.38   14.00
  -7  13  12    3.40    2.50
   7  13 -12   -1.30    2.40
  -7 -13  12    2.60    4.00
  -9  13  14    1.70    3.00
   9  13 -14    4.20    2.80
  -9 -13  14    3.20    4.80
 -18  14  13   72.79    8.50
 -18  14  13   75.19    7.40
 -18 -14  13   64.39    9.70
 -16  14  11   23.80    4.20
  16  14 -11   30.60    4.10
 -16  14  11   24.80    3.50
 -16 -14  11   23.00    6.50
 -14  14   9    4.90    2.90
  14  14  -9    8.50    2.90
 -14  14   9    1.80    2.30
 -14 -14   9    5.80    4.80
  12  14  -7    3.20    1.90
 -12  14   7    1.00    2.60
  12  14  -7   -0.40    2.30
 -12 -14   7    1.40    4.00
  10  14  -5  109.99    9.00
 -10  14   5  111.69    9.40
  10  14  -5   95.09    9.20
 -10 -14   5  124.59   10.20
   8  14  -3  548.55   46.80
   8  14  -3  605.04   46.80
  -8 -14   3  638.14   47.10
   6  14  -1    4.30    1.80
   6  14  -1    3.00    1.60
  -6  14   1    8.40    3.00
   4  14   1  119.99   10.20
   4  14   1  128.99   10.20
  -2  14  -3  129.39   10.90
   2  14   3  139.39   10.90
   2  14   3  128.79   11.00
   0  14   5   22.30    3.80
   0  14   5   30.00    3.40
   0  14  -5   28.70    3.50
   2  14  -7  320.37   25.30
  -2  14   7  314.87   25.20
   4  14  -9   80.59    7.10
  -4  14   9   73.09    7.00
  -4 -14   9   77.49    8.40
  -6  14  11   82.89    8.30
   6  14 -11   99.89    8.20
  -6 -14  11   89.29   10.00
   8  14 -13  247.58   19.30
  -8  14  13  221.98   19.30
  -8 -14  13  246.38   20.50
 -17  15  12   69.09    7.70
 -17  15  12   77.89    8.60
 -15  15  10   30.80    4.60
 -15  15  10   26.10    4.00
  15  15 -10   39.40    6.90
 -13  15   8    5.20    3.10
  13  15  -8    0.60    2.80
 -13 -15   8    3.80    5.00
 -11  15   6  244.28   19.00
  11  15  -6  212.58   18.80
  11  15  -6  232.78   18.70
 -11 -15   6  250.67   19.80
   9  15  -4    3.60    2.00
  -9  15   4    9.40    2.60
  -7  15   2  328.97   26.30
   7  15  -2  334.17   26.20
   7  15  -2  328.47   26.40
   5  15   0  273.37   21.10
   5  15   0  240.48   21.10
  -5  15   0  283.97   21.30
  -3  15  -2    4.70    2.20
   3  15   2    5.90    1.90
   3  15   2    4.20    2.20
  -1  15  -4   54.69    5.90
   1  15   4   70.99    5.90
   1  15   4   58.89    5.70
  -1  15   6   61.39    5.50
   1  15  -6   52.49    5.80
  -3  15   8   10.10    2.40
   3  15  -8    7.10    2.50
  -5  15  10  330.77   27.20
   5  15 -10  352.36   27.30
 -14  16   9   24.30    3.80
 -14  16   9   25.00    4.50
  14  16  -9   23.30    4.10
 -14 -16   9   29.10    7.10
 -12  16   7  147.59   13.50
  12  16  -7  151.58   13.30
 -12 -16   7  181.88   15.10
  10  16  -5   31.60    4.80
  10  16  -5   40.20    4.70
 -10  16   5   39.50    5.40
   8  16  -3   22.40    3.40
   8  16  -3   28.40    4.00
  -8  16   3   34.10    4.60
  -6  16   1    4.90    2.50
   6  16  -1    3.20    2.10
   6  16  -1    7.10    2.50
  -4  16  -1  163.68   13.80
   4  16   1  170.88   13.60
   4  16   1  167.08   13.70
   2  16   3   81.49    6.80
   2  16   3   61.09    6.50
  -2  16  -3   71.19    6.70
   0  16   5   10.70    2.50
   0  16  -5   12.00    2.70
  -4  16   9   48.20    5.80
   4  16  -9   50.99    5.80
 -13  17   8   97.09   10.10
  13  17  -8   88.19    9.60
 -13 -17   8  116.29   12.90
  11  17  -6   -0.60    3.00
  11  17  -6    3.00    3.20
 -11  17   6    3.70    3.50
   9  17  -4  145.99   12.40
   9  17  -4  149.59   12.60
   7  17  -2   20.50    3.10
   7  17  -2   19.60    3.50
  -7  17   2   19.60    3.40
  -5  17   0   31.00    4.90
   5  17   0   35.00    4.50
   5  17   0   31.60    4.90
  -3  17  -2  145.49   12.20
   3  17   2  126.39   11.30
   1  17   4   82.19    7.60
  -1  17  -4   84.49    7.90
   1  17  -6  231.78   19.00
  -1  17   6  232.58   18.90
  10  18  -5   11.80    3.90
  10  18  -5    5.80    3.40
   8  18  -3   89.09    8.20
   8  18  -3   85.09    8.60
  -8  18   3   84.19    8.70
  -6  18   1    1.00    3.20
   6  18  -1    2.40    2.80
   4  18   1   11.10    3.00
  -4  18  -1   15.00    3.50
 -26   0  20   30.50    5.60
 -24   0  18  142.49   12.90
 -22   0  16   26.20    3.80
 -20   0  14   16.10    2.70
  20   0 -14   18.90   14.30
 -20   0  14   23.50   15.80
 -18   0  12  570.14   46.50
  18   0 -12  577.14   49.20
  18   0 -12  905.41  108.59
 -16   0  10    1.70    5.80
 -16   0  10    3.80    1.50
  16   0 -10    5.00    6.10
 -16   0  10  -12.50   40.50
  16   0 -10  -17.10   45.90
 -14   0   8 1681.63  168.98
 -14   0   8 2034.20  159.68
 -14   0   8 2231.48  157.88
  14   0  -8 2062.79  158.88
 -12   0   6  342.77   23.30
 -12   0   6  314.97   24.60
  12   0  -6  264.17   24.50
  12   0  -6  275.87   50.69
 -12   0   6  242.38   41.50
 -12   0   6  278.57   23.40
 -10   0   4 1359.86  105.59
  10   0  -4 1516.55  105.49
  10   0  -4 1311.67  106.29
 -10   0   4 1195.78  113.19
 -10   0   4 1337.27  106.69
  -8   0   2 3518.35  318.47
  -8   0   2 4146.89  314.17
   8   0  -2 4519.45  319.87
   8   0  -2 3730.73  314.17
   8   0  -2 4187.48  313.57
  -6   0   0  521.65   54.29
   6   0   0  590.54   45.90
  -6   0   0  595.24   45.80
   6   0   0  602.84   46.60
  -4   0  -2  357.26   27.80
   4   0   2  329.47   27.70
   4   0   2  374.76   28.60
   4   0   2  344.67   27.90
  -4   0  -2  365.26   27.70
  -2   0  -4    6.70    0.80
  -2   0  -4   28.30   23.60
   2   0   4    1.60   21.90
   2   0   4    4.40    2.90
  -2   0  -4    7.90    1.10
  -2   0  -4   12.30    3.10
   0   0   6  252.87   19.90
   0   0   6  281.77   21.50
   0   0   6  230.28   40.60
   0   0  -6  265.77   47.10
   0   0   6  251.87   19.70
   0   0  -6  224.28   20.90
  -2   0   8 4595.84  333.57
   2   0  -8 4815.32  346.47
  -2   0   8 4361.16  332.37
   2   0  -8 3759.32  333.17
  -2   0   8 3752.52  344.27
  -2   0   8 4285.77  332.27
  -4   0  10  116.99    9.30
  -4   0  10  158.68   51.59
  -4   0  10  116.79    9.50
   4   0 -10  106.59   12.80
  -6   0  12   35.40   10.10
  -6   0  12   -0.20   66.49
   6   0 -12   32.40   70.29
   6   0 -12   26.80    8.40
  -6   0  12   32.30    3.20
  -6   0  12   31.30    3.60
  -8   0  14  278.77   21.80
   8   0 -14  229.58  103.89
  -8   0  14  270.47   22.60
  -8   0  14  303.87   31.10
   8   0 -14  261.67   27.20
  -8   0  14  139.49   97.09
 -10   0  16  112.39    9.30
 -10   0  16  101.19    9.20
 -12   0  18  405.26   31.00
 -12   0  18  374.26   31.00
 -14   0  20   19.90    4.50
 -25   1  19   30.20    5.50
 -23   1  17   53.99    6.30
 -23  -1  17   48.00    6.80
 -21   1  15   53.99    6.10
 -21  -1  15   60.99    6.30
 -19   1  13   70.59    6.90
 -19   1  13   75.59   75.59
  19   1 -13   88.39   15.50
 -19   1  13  104.09   17.20
  19  -1 -13   65.49   13.00
 -19  -1  13   92.49   16.00
 -19  -1  13   77.79    7.00
  19  -1 -13  157.98   86.39
 -17   1  11   81.99    7.30
  17   1 -11  126.69   56.29
 -17   1  11   32.70   51.89
 -17   1  11   97.99   13.70
  17   1 -11   96.59   13.00
  17  -1 -11   94.89   13.00
  17  -1 -11  177.08   63.49
 -17  -1  11   81.79    7.40
 -17  -1  11   79.89   12.20
 -17  -1  11   77.29   50.99
 -15   1   9   30.30   38.50
  15   1  -9   39.10   38.40
 -15   1   9   21.70    6.10
 -15   1   9   28.80    2.40
 -15   1   9   24.40    2.90
  15   1  -9   36.40    6.60
 -15   1   9   29.90    2.30
 -15  -1   9   24.80    3.00
  15  -1  -9   26.50    6.50
  15  -1  -9   86.69   44.80
 -15  -1   9   22.70    5.30
 -15  -1   9   42.30   35.60
 -13   1   7  618.84   46.10
 -13   1   7  545.15   44.80
  13   1  -7  725.23   63.29
 -13   1   7  402.26   69.69
  13   1  -7  571.14   45.90
 -13  -1   7  475.75   60.09
 -13  -1   7  534.25   44.80
 -13  -1   7  606.14   45.90
  13  -1  -7  691.83   66.89
  13  -1  -7  557.64   46.10
 -11   1   5 1100.49   92.59
  11   1  -5 1057.89   93.19
  11   1  -5 1276.57   92.49
 -11   1   5 1235.98   93.39
 -11  -1   5 1122.29   92.59
 -11  -1   5 1164.58   93.19
  11  -1  -5 1314.97   92.49
  11  -1  -5 1366.66  103.79
  11  -1  -5 1082.79   93.39
   9   1  -3  644.84   55.39
   9   1  -3  717.23   54.69
  -9   1   3  697.23   55.39
   9  -1  -3  661.73   55.59
  -9  -1   3  684.93   54.79
   9  -1  -3  794.82   54.79
   7   1  -1   10.20    1.50
  -7   1   1   39.60   18.20
  -7   1   1   14.00    1.30
   7   1  -1   12.00    2.70
   7   1  -1   14.10   15.80
  -7   1   1   15.90    2.90
  -7  -1   1   15.50   15.00
  -7  -1   1   16.10    3.20
   7  -1  -1   12.00    1.50
  -7  -1   1   13.80    1.30
   7  -1  -1    6.20   18.40
   7  -1  -1    9.90    3.00
   5   1   1    7.50    2.70
   5   1   1    9.30    0.80
  -5   1  -1   11.90   15.80
   5   1   1    6.30    1.00
  -5   1  -1    6.10   18.10
  -5   1  -1    8.80    0.90
   5   1   1    8.10    2.30
  -5  -1  -1    8.30   15.70
   5  -1   1    7.70    2.90
  -5  -1  -1    8.80   15.50
  -5  -1  -1    8.10    0.80
   5  -1   1    6.70    1.10
   5  -1   1    5.50    2.70
  -3   1  -3  200.58   17.60
   3   1   3  184.48   33.40
  -3   1  -3  249.88   34.50
   3   1   3  209.78   16.60
   3   1   3  231.78   17.60
  -3   1  -3  212.68   16.50
   3  -1   3  213.28   17.70
  -3  -1  -3  180.08   17.40
   3  -1   3  213.88   16.70
  -3  -1  -3  221.58   16.50
   3  -1   3  210.38   31.50
  -1   1  -5 1743.63  145.99
  -1   1  -5 1892.71  145.19
   1   1   5 1830.12  145.19
  -1   1  -5 1929.01  156.48
   1   1   5 1921.11  146.09
   1   1   5 1849.61  145.29
  -1  -1  -5 1942.41  145.09
   1  -1   5 1964.80  146.19
  -1  -1  -5 1962.40  155.88
   1  -1   5 1901.51  145.29
  -1  -1  -5 1724.93  145.89
   1  -1   5 1749.92  145.19
   1  -1   5 1799.42  156.58
  -1   1   7   70.89    8.60
   1   1  -7   58.49   36.20
  -1   1   7   70.19    5.40
  -1   1   7   70.49    5.60
  -1   1   7   75.99   34.10
   1   1  -7   62.19    8.00
  -1  -1   7   67.19    8.80
  -1  -1   7   38.80   35.20
   1  -1  -7   52.89    7.90
   1  -1  -7   58.49   35.00
  -1  -1   7   71.89    5.80
  -1  -1   7   68.69    5.50
   3   1  -9  295.57   26.90
  -3   1   9  282.37   54.19
  -3   1   9  315.77   25.10
  -3   1   9  315.07   25.20
  -3   1   9  351.86   27.50
   3  -1  -9  314.77   55.29
  -3  -1   9  318.37   25.10
  -3  -1   9  250.47   55.39
   3  -1  -9  306.57   26.90
  -3  -1   9  364.96   27.80
  -3  -1   9  314.17   25.20
   5   1 -11  540.15   89.29
  -5   1  11  227.18   64.49
   5   1 -11  318.67   31.30
  -5   1  11  378.96   29.10
  -5   1  11  381.46   29.20
  -5   1  11  389.36   32.20
  -5  -1  11  409.36   32.40
  -5  -1  11  243.98   70.99
  -5  -1  11  393.76   29.20
   5  -1 -11  333.27   31.50
  -5  -1  11  374.16   29.10
  -7   1  13   61.89   12.90
  -7   1  13    4.30   76.49
   7   1 -13   29.60    9.90
  -7   1  13   45.50    4.50
  -7   1  13   56.49    4.80
   7   1 -13  110.69   79.19
   7  -1 -13   33.90   10.00
  -7  -1  13   49.20    4.60
  -7  -1  13   65.19   13.10
  -7  -1  13   13.50   78.89
   7  -1 -13   98.19   86.69
  -7  -1  13   46.00    4.90
   9   1 -15    1.80   12.20
  -9   1  15   29.50  109.09
  -9   1  15    6.70    2.20
  -9   1  15    5.50    2.10
  -9   1  15   20.70   16.00
   9  -1 -15   -6.50   13.00
  -9  -1  15    9.30    2.50
   9  -1 -15   73.19  178.28
  -9  -1  15    8.00    2.30
  -9  -1  15   12.20   16.20
 -11   1  17   17.50    3.30
 -11   1  17   26.30    3.60
 -11  -1  17   26.90    3.60
 -11  -1  17   29.40    3.70
 -13   1  19    3.80    3.50
 -13   1  19    9.00    3.80
 -13  -1  19    4.60    3.60
 -15  -1  21  115.69   11.60
 -26   2  20    5.90    4.70
 -26  -2  20   -4.00    5.10
 -24   2  18    3.00    3.70
 -24  -2  18    6.30    3.70
 -22   2  16   39.70    5.30
 -22  -2  16   42.70    5.80
 -20   2  14   25.50    4.30
 -20   2  14   44.60   14.80
  20  -2 -14   25.50   13.30
 -20  -2  14   35.90    4.40
 -18   2  12   74.29   63.69
 -18   2  12  162.48   13.70
 -18   2  12  166.38   27.70
  18   2 -12  190.68   18.90
 -18  -2  12  145.99   13.80
 -18  -2  12  203.28   18.40
  18  -2 -12  182.98   20.40
  18  -2 -12  220.48   77.39
 -16   2  10  150.98   15.80
 -16   2  10  172.28   51.29
 -16   2  10  152.08   11.70
 -16   2  10  154.78   12.10
  16   2 -10  219.18   49.00
  16   2 -10  152.28   15.20
 -16  -2  10  106.99   67.19
 -16  -2  10  136.39   12.10
  16  -2 -10  269.17   58.69
  16  -2 -10  134.59   16.10
 -14   2   8   80.99   36.50
  14   2  -8  128.39   12.00
  14   2  -8  126.59   34.10
 -14   2   8  120.69    9.60
 -14   2   8  128.39   12.60
  14  -2  -8  107.09   12.90
 -14  -2   8  115.89    9.70
  14  -2  -8  152.58   40.90
 -14  -2   8  105.09   32.90
  12   2  -6   14.30   22.50
 -12   2   6   24.90    4.70
 -12   2   6   23.20    2.30
  12   2  -6   26.70    4.40
 -12   2   6    2.50   23.70
 -12  -2   6   24.20    4.70
  12  -2  -6   43.20   27.40
  12  -2  -6   32.20    6.30
 -12  -2   6   24.00    2.50
 -12  -2   6   22.80   21.50
  10   2  -4   19.80    1.80
 -10   2   4   20.40    1.90
 -10   2   4  -18.00   21.80
 -10   2   4   15.80    3.60
  10   2  -4   19.20    3.40
 -10  -2   4   13.90    3.00
 -10  -2   4   19.70    1.70
  10  -2  -4   11.40   23.50
 -10  -2   4   22.30    2.10
 -10  -2   4   43.20   17.80
  10  -2  -4   25.50    5.10
  -8   2   2    6.90    2.80
  -8   2   2    8.10    1.10
   8   2  -2    6.70    1.10
   8   2  -2    8.30   15.50
  -8   2   2    1.60   17.10
   8  -2  -2    8.60   19.90
   8  -2  -2    8.90    1.10
  -8  -2   2    4.80    2.10
  -8  -2   2   -0.20   13.80
   8  -2  -2   13.50    3.40
   6   2   0 1901.41  134.29
   6   2   0 1773.62  133.69
   6   2   0 1709.93  134.29
  -6   2   0 1862.51  134.39
  -6   2   0 1730.53  133.69
   6  -2   0 1471.95  134.29
   6  -2   0 1754.72  141.59
  -6  -2   0 1505.95  139.19
   6  -2   0 1716.33  133.69
  -6  -2   0 1632.64  133.69
  -6  -2   0 1769.02  139.29
   4   2   2   34.80   18.90
  -4   2  -2   31.80    2.60
   4   2   2   35.50    2.80
  -4   2  -2    9.60   19.60
  -4   2  -2   48.20   20.70
   4  -2   2   25.30    4.90
   4  -2   2   23.60    5.00
  -4  -2  -2   35.00    4.50
  -2   2  -4 1466.25  125.39
  -2   2  -4 1735.63  135.69
  -2   2  -4 1687.03  124.69
   2   2   4 1611.34  133.99
   2   2   4 1674.63  124.69
  -2  -2  -4 1598.64  125.39
   2  -2   4 1491.35  124.69
  -2  -2  -4 1803.92  134.89
   2  -2   4 1394.56  124.79
   2  -2   4 1639.04  125.59
   2  -2   4 1541.65  135.59
   0   2  -6   44.00   30.50
   0   2   6   40.60   28.30
   0   2  -6   21.30    4.40
   0   2   6   18.50    4.50
   0   2   6   28.20    2.40
   0   2  -6   27.80    2.20
   0  -2   6   15.50   31.80
   0  -2  -6   25.50    2.20
   0  -2  -6   22.00    4.30
   0  -2   6   21.90    2.30
   0  -2   6   34.40    6.10
  -2   2   8  541.95   42.00
  -2   2   8  536.75   40.50
  -2   2   8  482.65   68.09
  -2   2   8  554.14   40.30
   2   2  -8  474.65   41.80
  -2  -2   8  541.45   40.50
   2  -2  -8  463.05   42.40
  -2  -2   8  526.65   40.40
  -2  -2   8  525.15   42.20
   2  -2  -8  489.55   70.99
  -2  -2   8  357.46   72.79
  -4   2  10  220.38   55.29
  -4   2  10  266.47   21.30
  -4   2  10  271.77   21.20
   4   2 -10  338.87   63.59
   4   2 -10  253.67   23.60
  -4   2  10  286.77   24.50
   4  -2 -10  282.67   63.19
   4  -2 -10  229.28   23.60
  -4  -2  10  307.67   24.90
  -4  -2  10  291.17   62.59
  -4  -2  10  258.07   21.20
  -4  -2  10  282.37   21.40
  -6   2  12   90.99   62.69
  -6   2  12  135.09   18.00
   6   2 -12  222.18   76.19
   6   2 -12   94.99   14.60
  -6   2  12  104.69    9.10
  -6   2  12  123.79    9.30
  -6  -2  12  107.79    9.30
  -6  -2  12  109.79    9.40
  -6  -2  12   61.79   73.99
   6  -2 -12  212.88  102.79
   6  -2 -12  112.69   15.30
  -6  -2  12  136.59   17.10
  -8   2  14   13.10   88.69
   8   2 -14  -30.50   95.79
  -8  -2  14  -46.30   94.89
   8  -2 -14  -18.30  104.49
 -10   2  16  137.89   11.20
 -10   2  16  126.99   11.00
 -10   2  16  170.28   32.80
  10  -2 -16  100.09   19.80
 -10  -2  16  119.19   11.20
 -10  -2  16  150.98   11.30
 -12   2  18    0.00    3.00
 -12   2  18   -0.60    3.00
 -12  -2  18   -1.50    3.00
 -12  -2  18    4.70    3.40
 -14  -2  20    0.10    4.00
 -25  -3  19   15.00    4.70
 -23   3  17   45.40    6.00
 -23  -3  17   48.40    6.30
 -21   3  15  143.39   12.20
 -19   3  13  148.29   21.10
 -19   3  13  156.88   10.90
  19   3 -13  137.99   17.80
 -19   3  13  130.09   11.40
 -19   3  13   77.69  130.19
  19  -3 -13  145.59  100.39
 -19  -3  13  119.49   11.60
  19  -3 -13  133.39   20.20
 -17   3  11    0.60    1.50
  17   3 -11    3.70    6.50
 -17   3  11    3.20    0.90
 -17   3  11    0.70   55.49
 -17   3  11    4.00    8.60
  17  -3 -11  -47.80   65.89
 -17  -3  11    7.40    5.90
 -17  -3  11   -0.80    1.80
 -17  -3  11    4.70   55.99
  17  -3 -11   10.50   10.10
 -15   3   9  546.15   40.80
 -15   3   9  484.05   38.60
 -15   3   9  425.26   73.79
  15   3  -9  489.05   40.00
  15  -3  -9  625.44   82.29
 -15  -3   9  513.75   39.90
 -15  -3   9  468.85   38.70
 -15  -3   9  410.36   62.59
  15  -3  -9  469.45   40.80
  13   3  -7  234.88   19.10
 -13   3   7  229.48   19.60
 -13   3   7  156.58   37.70
  13   3  -7  284.97   42.80
 -13   3   7  222.98   17.70
 -13  -3   7  238.68   42.50
  13  -3  -7  287.17   46.90
 -13  -3   7  205.98   17.80
 -13  -3   7  230.58   18.80
  13  -3  -7  219.88   19.90
  11   3  -5  178.48   16.80
 -11   3   5  177.48   34.60
  11   3  -5  279.07   33.00
 -11   3   5  203.98   17.50
 -11   3   5  196.18   15.90
 -11  -3   5  186.18   31.70
  11  -3  -5  306.67   44.10
 -11  -3   5  214.38   16.00
  11  -3  -5  189.58   17.60
 -11  -3   5  210.88   16.70
   9   3  -3  286.77   24.20
  -9   3   3  289.87   23.60
  -9   3   3  330.07   24.60
   9   3  -3  307.57   23.60
   9   3  -3  281.37   35.00
  -9   3   3  303.67   40.80
  -9  -3   3  236.88   33.10
   9  -3  -3  313.87   41.90
   9  -3  -3  336.07   23.60
   9  -3  -3  296.27   24.90
  -9  -3   3  283.57   23.70
   7   3  -1    3.60    0.70
   7   3  -1    4.20    2.10
  -7   3   1    9.00   18.80
   7   3  -1    1.10    2.10
  -7   3   1    3.50    0.70
  -7   3   1   10.70    2.90
   7  -3  -1    6.30    0.90
  -7  -3   1    3.20    0.90
  -7  -3   1    7.30   13.40
  -7  -3   1   15.50   14.00
   7  -3  -1    7.20    3.20
   7  -3  -1   31.10   21.60
  -5   3  -1  985.50   75.49
  -5   3  -1 1095.09   85.69
   5   3   1 1054.29   76.29
  -5   3  -1  916.81   84.69
   5   3   1  871.21   75.99
   5   3   1 1004.00   75.49
   5  -3   1  983.50   75.59
  -5  -3  -1  939.91   82.79
   5  -3   1  943.21   76.29
  -5  -3  -1  947.91   82.69
   5  -3   1  908.31   76.39
   3   3   3 1026.70   74.89
  -3   3  -3 1121.69   86.89
   3   3   3  887.51   83.09
  -3   3  -3  909.21   84.79
   3   3   3 1004.30   74.19
  -3   3  -3  976.30   74.09
   3  -3   3  981.50   74.29
  -3  -3  -3  900.91   84.09
  -3  -3  -3  829.22   74.69
   3  -3   3  873.71   75.09
   1   3   5  248.98   19.80
  -1   3  -5  261.57   45.00
   1   3   5  250.07   43.00
   1   3   5  288.57   21.80
  -1   3  -5  249.18   19.80
  -1   3  -5  230.88   21.00
  -1  -3  -5  249.68   38.20
   1  -3   5  275.97   21.50
  -1  -3  -5  254.27   20.90
   1  -3   5  202.48   38.90
   1  -3   5  232.78   19.80
  -1   3   7   11.30    4.50
  -1   3   7    7.00    1.20
  -1   3   7    9.10    1.00
   1   3  -7    9.00    4.20
   1   3  -7   46.80   36.50
  -1   3   7   14.20   31.90
  -1  -3   7   14.40    5.10
  -1  -3   7    8.50    1.30
  -1  -3   7   18.80   38.40
  -1  -3   7    8.80    1.60
   1  -3  -7   24.60   34.20
   1  -3  -7    8.40    3.90
   1  -3  -7    9.00    1.00
  -3   3   9    2.40    1.10
   3   3  -9   -3.00    4.80
  -3   3   9    2.60    0.80
   3   3  -9   16.00   46.40
  -3   3   9   -2.40    5.60
  -3   3   9  -21.00   40.70
   3  -3  -9  -10.40   46.70
  -3  -3   9    2.40    6.90
   3  -3  -9   -3.60    4.80
  -3  -3   9    1.90    1.40
  -3  -3   9   27.30   45.70
  -3  -3   9   -0.30    1.10
   5   3 -11  159.08   18.40
  -5   3  11  148.29   58.59
  -5   3  11  186.88   14.80
   5   3 -11  165.28   66.99
  -5   3  11  200.78   14.70
  -5   3  11  208.98   20.20
   5  -3 -11  182.48   18.70
  -5  -3  11  176.98   14.90
  -5  -3  11  180.78   14.80
   5  -3 -11  186.08   70.19
  -5  -3  11  197.48   20.00
  -5  -3  11  176.68   68.49
  -7   3  13  503.75   40.30
   7   3 -13  470.95   43.40
  -7   3  13  519.15   40.20
   7   3 -13  563.54  102.09
   7  -3 -13  493.25  103.79
  -7  -3  13  580.44   45.20
  -7  -3  13  531.75   40.30
   7  -3 -13  460.85   43.70
  -7  -3  13  569.74  105.99
  -9   3  15   51.59  115.49
  -9   3  15   94.09    8.60
  -9   3  15   89.09    8.40
  -9   3  15  111.39   22.10
  -9  -3  15   98.69    8.60
   9  -3 -15  214.98  130.99
   9  -3 -15  110.99   21.10
  -9  -3  15  115.09    8.80
 -11   3  17   57.69    6.20
 -11   3  17   67.19    6.50
 -11  -3  17   56.99    6.60
 -11  -3  17   58.69    6.50
 -13   3  19   34.60    7.30
 -13  -3  19   32.70    4.70
 -24   4  18   36.10    5.10
 -24  -4  18   39.20    5.50
 -22   4  16   -3.80    2.90
 -22  -4  16    3.00    3.30
 -20   4  14    0.50    1.30
 -20   4  14  -66.69   98.09
 -20   4  14   10.50   15.90
 -20   4  14   -2.20    2.30
  20  -4 -14   11.80   14.70
  20  -4 -14   33.30  127.99
 -20  -4  14    1.30    2.60
 -18   4  12  514.75   38.20
 -18   4  12  454.45   38.40
 -18   4  12  479.65   87.59
  18   4 -12  514.05   40.90
 -18  -4  12  525.45   40.80
  18  -4 -12  460.95   42.60
 -18  -4  12  443.26   38.50
  18  -4 -12  776.92  134.09
 -16   4  10    7.50   51.69
 -16   4  10   79.19    6.90
  16   4 -10   81.89   11.40
  16   4 -10   54.09   42.20
 -16   4  10  109.99   13.70
 -16  -4  10   97.59   15.10
  16  -4 -10   82.39   13.70
  16  -4 -10  179.38   67.89
 -16  -4  10   73.09    7.10
 -16  -4  10   52.99   42.50
 -14   4   8   57.09   40.40
  14   4  -8   39.60    7.00
 -14   4   8   45.40   10.60
  14   4  -8   79.79   31.10
 -14   4   8   43.50    3.80
 -14  -4   8   47.90   30.20
  14  -4  -8   36.70    7.60
 -14  -4   8   44.20    6.70
  14  -4  -8   45.00   48.50
 -14  -4   8   37.00    4.10
  12   4  -6  126.99   25.20
  12   4  -6  107.09    9.40
 -12   4   6   95.19    7.90
  12   4  -6  104.69    7.70
 -12   4   6   66.49   33.50
  12  -4  -6   97.49   37.50
 -12  -4   6   97.59    8.10
 -12  -4   6   90.69    9.10
 -12  -4   6   85.19   23.90
  12  -4  -6   85.39   10.90
  10   4  -4   54.29    4.00
 -10   4   4   45.40    4.10
 -10   4   4   54.89   26.30
  10   4  -4   33.60   17.40
 -10   4   4   44.90    6.70
  10   4  -4   42.30    5.40
 -10  -4   4   48.90   17.10
 -10  -4   4   56.99    4.40
  10  -4  -4  100.79   29.00
 -10  -4   4   47.20    5.30
  10  -4  -4   44.80    7.40
  -8   4   2 1219.68   91.49
   8   4  -2 1231.18   90.59
   8   4  -2 1089.59   90.99
  -8   4   2 1189.98   90.59
  -8   4   2 1054.89  100.19
  -8  -4   2 1179.48   90.69
   8  -4  -2 1119.59   91.59
   8  -4  -2 1231.48   90.69
  -8  -4   2  955.00   96.59
   8  -4  -2 1305.77  102.39
  -6   4   0  785.22   57.99
   6   4   0  753.42   57.69
  -6   4   0  716.73   57.19
  -6   4   0  704.93   67.89
   6   4   0  731.13   57.09
  -6  -4   0  751.72   64.89
   6  -4   0  782.32   70.79
   6  -4   0  717.53   58.09
  -6  -4   0  628.64   64.29
   6  -4   0  724.33   57.19
   4   4   2   95.49   22.20
   4   4   2  102.59    7.70
  -4   4  -2  103.99   26.00
  -4   4  -2   89.29   25.70
   4   4   2  112.19    8.70
   4  -4   2   86.19    9.70
   4  -4   2   97.79    7.80
   4  -4   2   82.79    9.50
  -4  -4  -2  128.19   23.40
  -4  -4  -2   86.39    8.70
   2   4   4  957.10   97.79
  -2   4  -4 1311.97  104.59
  -2   4  -4 1034.30  100.69
  -2   4  -4 1149.48   89.09
   2   4   4 1132.89   89.09
   2   4   4 1294.57   89.89
   2  -4   4 1233.18   90.29
  -2  -4  -4 1150.68  100.99
  -2  -4  -4 1102.19   89.79
   2  -4   4 1091.59   89.09
   2  -4   4 1080.79   89.19
   0   4   6   74.19   29.70
   0   4   6   61.39    4.90
   0   4  -6   68.59   35.40
   0   4  -6   62.49    4.90
   0   4   6   62.89    7.80
   0   4  -6   59.69    7.70
   0  -4  -6   42.90   32.70
   0  -4   6   99.29   38.40
   0  -4   6   49.40    8.50
   0  -4   6   54.89    5.00
   0  -4  -6   65.49    7.40
   0  -4   6   59.49    5.20
  -2   4   8  229.58   18.00
   2   4  -8  362.96   64.69
  -2   4   8  248.98   20.40
   2   4  -8  197.08   19.80
  -2   4   8  251.17   17.90
  -2   4   8  229.08   46.00
  -2  -4   8  235.08   18.10
   2  -4  -8  207.58   17.80
  -2  -4   8  223.68   20.90
   2  -4  -8  217.68   50.19
  -2  -4   8  223.38   18.00
  -2  -4   8  238.48   54.59
  -4   4  10    1.50    7.40
   4   4 -10   18.10   55.19
  -4   4  10  -31.70   48.90
  -4   4  10    6.60    1.40
   4   4 -10    7.80    8.00
  -4   4  10    6.80    1.10
   4  -4 -10    7.50    6.10
  -4  -4  10    5.70    1.50
   4  -4 -10   35.00   55.89
  -4  -4  10   18.00    7.90
  -4  -4  10  -15.70   57.19
  -6   4  12   85.79    6.90
  -6   4  12   79.59   16.20
  -6   4  12   80.89    6.80
   6   4 -12   58.19   13.00
  -6   4  12   70.79   68.79
   6   4 -12   82.89   76.09
  -6  -4  12   27.40   77.69
  -6  -4  12   86.79    7.20
  -6  -4  12   85.29   16.60
   6  -4 -12   88.69   14.90
  -6  -4  12   81.29    7.80
   6  -4 -12   76.19   79.79
  -8   4  14  145.79   11.50
  -8   4  14  129.39   11.70
  -8   4  14  129.09   98.19
   8  -4 -14  309.27  115.49
  -8  -4  14  147.79   11.80
  -8  -4  14  147.39   12.00
 -10   4  16   60.29    5.80
 -10   4  16   56.49    5.60
 -10  -4  16   53.69    6.00
 -10  -4  16   50.79    6.00
 -12   4  18   88.99   10.60
 -12  -4  18   78.99    8.50
 -14  -4  20   11.70    4.60
 -25   5  19    6.00    4.30
 -25  -5  19   10.00    5.00
 -23   5  17   22.30    4.20
 -23  -5  17   28.70    4.70
 -21   5  15   16.20    3.10
 -21  -5  15    9.60    3.50
 -19   5  13   82.59    8.00
 -19   5  13  105.19   27.00
 -19   5  13  -28.40   87.49
 -19   5  13   95.69    7.50
  19  -5 -13  107.49   21.60
  19  -5 -13   73.99  114.19
 -19  -5  13   93.39    8.70
  17   5 -11  136.49   15.30
 -17   5  11  170.78   18.50
 -17   5  11   76.09   66.99
 -17   5  11  144.09   11.20
 -17   5  11  133.59   11.40
  17  -5 -11  136.79   19.00
 -17  -5  11  130.59   11.80
 -17  -5  11  145.09   14.80
  17  -5 -11  375.66   86.59
 -15   5   9   72.39   47.50
 -15   5   9   57.79    5.40
  15   5  -9   70.49   36.60
  15   5  -9   72.09    8.80
 -15  -5   9   61.39    8.40
 -15  -5   9   45.90   36.10
  15  -5  -9   65.39   12.60
  15  -5  -9   57.29   70.09
 -15  -5   9   56.89    6.00
 -13   5   7  227.38   18.00
  13   5  -7  282.07   40.50
 -13   5   7  198.38   44.50
 -13   5   7  252.87   20.50
  13   5  -7  220.08   19.00
 -13  -5   7  218.58   18.90
 -13  -5   7  221.68   42.10
 -13  -5   7  220.78   18.10
  13  -5  -7  266.77   52.29
  13  -5  -7  219.48   20.70
 -11   5   5  107.59   33.30
  11   5  -5  160.58   28.80
 -11   5   5  106.49    9.30
  11   5  -5  122.99   10.30
  11   5  -5  130.49    9.20
 -11   5   5  122.29   11.70
 -11  -5   5  106.69    9.50
  11  -5  -5  122.79   14.20
 -11  -5   5   95.89   22.10
  11  -5  -5  107.89   38.10
 -11  -5   5  104.49   10.10
   9   5  -3  404.16   35.30
   9   5  -3  487.85   34.90
  -9   5   3  480.55   36.50
  -9   5   3  433.56   35.00
   9  -5  -3  514.95   55.99
  -9  -5   3  454.85   35.00
   9  -5  -3  396.86   36.20
  -7   5   1  150.78   30.30
  -7   5   1  202.48   15.50
   7   5  -1  174.88   14.10
  -7   5   1  174.68   14.10
   7   5  -1  181.48   14.60
   7   5  -1  164.48   14.60
  -7  -5   1  195.38   14.10
  -7  -5   1  209.68   27.90
   7  -5  -1  166.38   15.70
   7  -5  -1  135.29   33.50
  -7  -5   1  140.69   24.60
   7  -5  -1  181.68   14.20
   5   5   1   10.50    2.50
   5   5   1   13.00    1.50
  -5   5  -1   31.50   21.70
   5   5   1   16.10    1.50
  -5   5  -1   14.90    1.70
   5   5   1   10.80    2.80
  -5  -5  -1   19.20   18.40
  -5  -5  -1   15.90    1.40
   5  -5   1   14.50    4.10
   5  -5   1   16.40    1.70
  -5  -5  -1   -3.20   16.20
  -3   5  -3  666.53   65.39
  -3   5  -3  602.84   47.90
   3   5   3  506.95   59.39
   3   5   3  624.94   47.90
   3   5   3  701.33   48.60
   3  -5   3  642.74   49.10
   3  -5   3  609.54   48.00
  -3  -5  -3  654.53   61.59
   3  -5   3  532.25   49.00
  -3  -5  -3  588.04   48.50
   1   5   5  159.28   12.30
  -1   5  -5  149.29   39.50
  -1   5  -5  135.99   33.60
   1   5   5  168.28   13.90
  -1   5  -5  154.18   12.30
   1   5   5  152.98   32.30
  -1  -5  -5  196.08   35.60
   1  -5   5  155.38   12.40
  -1  -5  -5  147.49   13.60
   1  -5   5  141.29   12.40
   1  -5   5  164.28   14.50
   1   5  -7  232.88   17.20
   1   5  -7  218.58   19.20
  -1   5   7  120.99   40.20
  -1   5   7  206.08   17.20
  -1   5   7  226.28   19.30
   1   5  -7  333.07   51.29
   1  -5  -7  188.88   18.80
  -1  -5   7  234.08   17.40
  -1  -5   7  103.09   49.80
  -1  -5   7  222.38   19.80
  -1  -5   7  226.28   17.30
  -3   5   9  167.08   13.80
  -3   5   9  202.08   13.70
  -3   5   9  184.48   17.70
   3   5  -9  320.97   60.19
   3   5  -9  151.58   16.60
  -3   5   9  141.69   48.70
  -3  -5   9  206.48   62.09
  -3  -5   9  160.58   14.00
   3  -5  -9  151.98   16.40
  -3  -5   9  187.38   14.00
   3  -5  -9  105.39   54.69
   5   5 -11   61.49   67.69
   5   5 -11   10.70    7.10
  -5   5  11   17.90    9.40
  -5   5  11   13.00    2.00
  -5   5  11   30.90   60.29
  -5   5  11   16.00    2.40
  -5  -5  11    7.30    8.90
   5  -5 -11    8.30    7.40
   5  -5 -11   -4.90   69.09
  -5  -5  11   25.00   73.59
  -5  -5  11   13.00    2.20
  -7   5  13  155.18   12.90
   7   5 -13  127.99   19.10
  -7   5  13  149.99   12.80
  -7   5  13  147.09   86.59
  -7  -5  13  169.08   13.00
   7  -5 -13  199.98  108.59
  -7  -5  13  171.48   12.90
  -7  -5  13  157.68   24.40
  -9   5  15   44.30    4.60
  -9   5  15   39.20    4.80
  -9  -5  15   38.40    5.20
  -9  -5  15   52.89    5.10
 -11   5  17   36.20    5.30
 -11  -5  17   38.90    5.70
 -11  -5  17   43.50    5.60
 -13   5  19   57.39    7.00
 -13  -5  19   43.20    5.80
 -15  -5  21    1.70    5.40
 -24   6  18    8.20    4.90
 -24  -6  18    6.60    4.60
 -22   6  16   23.40    3.90
 -22  -6  16   25.30    4.60
 -20   6  14  126.59    9.60
 -20   6  14  110.79   10.20
 -20  -6  14  109.29   10.70
 -18   6  12  200.48   22.60
 -18   6  12  148.39   13.60
 -18   6  12  142.89   84.09
  18   6 -12  171.58   18.60
 -18   6  12  162.28   13.20
 -18  -6  12  166.18   13.90
  18  -6 -12  291.77  109.49
 -18  -6  12  176.88   17.70
  18  -6 -12  173.98   23.80
 -16   6  10  433.36   75.99
  16   6 -10  389.96   32.50
 -16   6  10  391.26   31.00
 -16   6  10  452.35   35.30
 -16  -6  10  374.86   32.30
 -16  -6  10  371.56   31.20
  16  -6 -10  384.66   35.20
 -14   6   8    3.50    7.10
 -14   6   8   16.40   46.90
  14   6  -8    6.00    3.90
  14   6  -8  -20.80   27.80
  14  -6  -8    3.30    7.00
  14  -6  -8    5.50   51.69
 -14  -6   8   -0.50    3.50
 -14  -6   8   12.40   31.80
 -12   6   6   -0.80    1.10
 -12   6   6  -48.10   35.10
 -12   6   6    3.70    5.70
  12   6  -6  -16.30   19.80
  12   6  -6   -0.10    2.80
  12   6  -6    1.40    0.70
 -12  -6   6   -1.30    1.60
  12  -6  -6   -0.80    5.60
 -12  -6   6    2.10    2.80
  12  -6  -6  -28.70   39.30
 -12  -6   6   -2.00   21.00
 -10   6   4  380.56   30.00
  10   6  -4  358.16   28.80
 -10   6   4  323.77   53.29
 -10   6   4  353.56   28.50
  10   6  -4  373.36   28.40
  10  -6  -4  452.75   59.49
  10  -6  -4  347.07   30.30
 -10  -6   4  355.46   37.50
   8   6  -2  131.79   11.80
  -8   6   2  143.09   11.50
  -8   6   2  136.99   32.40
   8   6  -2  162.08   11.90
  -8   6   2  144.09   13.30
   8  -6  -2   95.99   55.89
  -8  -6   2  162.18   11.60
  -8  -6   2  142.09   21.40
   8  -6  -2  119.49   13.70
  -8  -6   2  150.98   26.50
  -6   6   0 1325.67  102.59
  -6   6   0 1402.86  103.39
   6   6   0 1514.95  102.89
  -6   6   0 1238.18  113.59
   6   6   0 1294.77  102.89
   6  -6   0 1443.96  117.29
  -6  -6   0 1382.96  102.49
  -6  -6   0 1114.39  107.19
   6  -6   0 1177.28  103.49
  -6  -6   0 1234.38  108.09
   6  -6   0 1294.47  102.59
  -4   6  -2   33.90   25.40
   4   6   2   57.99    5.60
  -4   6  -2   83.99   30.20
   4   6   2   49.80    4.00
  -4   6  -2   50.19    4.20
   4   6   2   52.09    4.20
   4   6   2   60.09   21.30
   4  -6   2   36.20    7.50
  -4  -6  -2   58.39   22.30
   4  -6   2   49.70    4.30
  -4  -6  -2   49.10    5.80
  -2   6  -4   52.29    4.30
  -2   6  -4   31.50   29.20
   2   6   4    0.90   24.00
  -2   6  -4  127.59   36.90
   2   6   4   54.39    4.30
   2   6   4   54.49    6.40
  -2  -6  -4   53.49    6.30
   2  -6   4   49.40    4.50
  -2  -6  -4   15.80   27.30
   2  -6   4   48.30    4.50
   0   6  -6  744.83   81.19
   0   6   6  726.93   51.89
   0   6   6  663.23   50.69
   0   6  -6  552.14   71.89
   0   6  -6  662.03   50.69
   0  -6  -6  546.05   51.49
   0  -6   6  628.84   50.79
   0  -6  -6  672.83   75.89
   0  -6   6  659.73   50.79
   2   6  -8    1.70    5.20
  -2   6   8    2.70    1.10
  -2   6   8  -17.40   39.10
   2   6  -8    6.40    1.10
  -2   6   8    2.00    8.70
   2   6  -8    1.80   55.49
  -2  -6   8    4.60    1.40
   2  -6  -8    9.30    5.00
  -2  -6   8    6.40    1.50
  -2  -6   8   15.60   55.79
   2  -6  -8    3.40    0.70
   4   6 -10  188.68   67.39
  -4   6  10  226.58   16.40
  -4   6  10  112.49   58.09
  -4   6  10  242.38   21.40
   4   6 -10  185.18   19.60
  -4   6  10  203.38   16.60
   4  -6 -10  188.78   19.90
  -4  -6  10  213.88   16.70
   4  -6 -10  217.38   74.39
  -4  -6  10  204.98   16.80
  -4  -6  10  216.98   76.19
  -4  -6  10  211.28   21.80
   6   6 -12    7.40    9.10
  -6   6  12  -39.80   72.19
   6  -6 -12  163.98   95.89
  -6  -6  12    2.60   10.80
  -8   6  14   25.80    3.60
  -8   6  14   28.90    3.40
  -8  -6  14   27.60    4.10
  -8  -6  14   25.30    3.50
 -10   6  16  184.18   14.90
 -10  -6  16  185.18   15.10
 -10  -6  16  176.08   15.20
 -12   6  18    4.20    3.40
 -12  -6  18    4.20    3.70
 -14   6  20   20.40    7.50
 -14  -6  20   34.80    5.80
 -25   7  19    9.50    7.40
 -23   7  17   35.80    5.10
 -23  -7  17   41.80    5.90
 -21   7  15   43.60    5.60
 -21   7  15   53.39    4.90
 -21  -7  15   43.90    7.10
 -19   7  13  233.18   17.90
 -19   7  13  217.08   18.20
 -17   7  11    8.80    2.10
  17   7 -11   13.50    7.10
 -17   7  11   26.90   12.80
 -17   7  11   14.10    2.10
 -17   7  11   75.59   77.09
  17  -7 -11  -53.49  169.18
  17  -7 -11    1.00   11.60
 -17  -7  11   17.70    6.20
 -17  -7  11    4.20    2.80
 -15   7   9  211.38   17.20
  15   7  -9  219.98   19.00
 -15   7   9  256.47   22.00
 -15   7   9  226.48   66.89
 -15  -7   9  212.88   18.60
  15  -7  -9  205.78   27.70
 -15  -7   9  198.18   17.60
  15  -7  -9  255.87   77.79
  13   7  -7  418.26   49.80
  13   7  -7  435.96   32.20
 -13   7   7  434.06   32.90
 -13   7   7  334.27   59.69
 -13   7   7  448.56   34.80
  13   7  -7  393.16   33.00
  13  -7  -7  506.65   83.39
 -13  -7   7  410.36   53.59
  13  -7  -7  380.16   35.10
 -13  -7   7  384.16   32.60
  11   7  -5    5.30    0.90
  11   7  -5    4.30    2.10
 -11   7   5    7.90    5.50
 -11   7   5   -8.20   35.50
  11  -7  -5    4.20    6.00
 -11  -7   5    2.70    1.70
 -11  -7   5   15.50   17.10
  -9   7   3  238.38   44.90
  -9   7   3  286.07   23.30
   9   7  -3  299.77   23.20
  -9   7   3  299.07   24.90
  -9  -7   3  305.97   23.40
   9  -7  -3  285.97   25.30
   9  -7  -3  427.86   60.09
   7   7  -1    2.30    0.70
   7   7  -1    3.60    1.60
   7   7  -1    3.10    1.30
  -7   7   1   -1.00    3.50
  -7   7   1    3.10   27.10
  -7   7   1    3.00    0.90
   7  -7  -1   -0.60   38.00
  -7  -7   1    9.10    9.90
  -7  -7   1    4.20    1.00
   7  -7  -1    2.20    4.60
   5   7   1  813.72   56.29
   5   7   1  723.43   55.99
  -5   7  -1  576.64   70.09
  -5   7  -1  718.63   55.99
   5   7   1  718.63   56.39
   5  -7   1  601.74   57.09
  -5  -7  -1  834.62   64.29
   5  -7   1  707.63   56.09
   3   7   3  521.25   37.80
  -3   7  -3  435.46   59.19
  -3   7  -3  496.15   37.90
   3   7   3  490.95   37.90
   3   7   3  504.45   38.60
  -3   7  -3  593.04   66.99
   3   7   3  410.36   52.99
   3  -7   3  398.36   39.40
  -3  -7  -3  561.84   55.49
   3  -7   3  530.35   39.60
   3  -7   3  438.06   38.00
  -1   7  -5   -6.90   40.30
   1   7   5    4.60    3.80
  -1   7  -5    2.50   33.20
   1   7   5    7.00    0.90
   1   7   5    7.70    1.10
   1   7   5    9.90   30.10
   1  -7   5    4.50    1.40
  -1  -7  -5    4.40    3.50
   1  -7   5    2.70    5.00
   1  -7   5    7.90    1.40
   1  -7   5    4.70    5.10
  -1  -7  -5   -7.50   31.70
   1   7  -7   46.10   40.70
   1   7  -7   31.50   50.69
  -1   7   7    8.30    1.20
   1   7  -7    8.00    1.30
  -1   7   7   10.20    1.30
  -1   7   7  -10.40   37.70
  -1   7   7    5.40    5.30
  -1  -7   7    9.60    7.30
  -1  -7   7    0.20    6.40
   1  -7  -7    4.00    4.40
  -1  -7   7   11.00    1.70
   1  -7  -7  -33.30   43.20
  -1  -7   7    7.00    1.60
   3   7  -9   33.70    3.10
  -3   7   9   29.20   12.10
  -3   7   9  -31.10   48.60
  -3   7   9   32.20    3.10
  -3   7   9   33.90    2.80
   3   7  -9   16.90    7.20
  -3  -7   9   44.80    9.70
  -3  -7   9   24.20    3.50
   3  -7  -9  -16.80   67.59
  -3  -7   9   25.30    3.60
   3  -7  -9   22.60    6.80
  -3  -7   9    4.80   70.29
   5   7 -11   29.60    9.40
   5   7 -11   27.00    3.00
  -5   7  11   25.10    3.10
  -5   7  11   29.30   67.69
  -5   7  11   30.00    2.80
  -5  -7  11   25.20    3.80
  -5  -7  11   10.90    9.80
   5  -7 -11  -28.90   89.99
  -7   7  13  406.16   32.70
  -7  -7  13  391.76   32.80
  -7  -7  13  445.46   32.80
  -9   7  15   10.30    2.50
  -9  -7  15    8.40    3.20
  -9  -7  15   11.30    3.00
 -11   7  17   35.80    5.00
 -11  -7  17   26.90    4.50
 -13   7  19   15.40    4.30
 -13  -7  19   15.80    4.90
 -24   8  18    8.20    4.60
 -22   8  16   45.20    6.50
 -22  -8  16   50.89    8.00
 -20   8  14    3.90    2.90
 -20   8  14    7.10    2.10
 -20  -8  14    4.60    4.00
 -18   8  12   66.99    6.60
 -18   8  12   77.79    6.20
 -18  -8  12   65.69    7.60
 -16   8  10  -40.10   72.09
 -16   8  10    1.10    1.80
  16   8 -10   -2.60    6.00
  16  -8 -10   14.30   93.09
 -16  -8  10    0.60    2.80
 -16  -8  10    2.20    5.00
 -14   8   8  122.39   15.70
  14   8  -8  109.39   11.00
 -14   8   8   89.59   58.89
 -14   8   8  110.59    9.30
  14   8  -8  125.29    9.00
  14  -8  -8  121.89   16.70
  14  -8  -8  136.39   73.89
 -14  -8   8  111.79   10.70
 -14  -8   8   93.29    9.80
 -12   8   6    5.90    6.90
  12   8  -6    4.50    2.20
 -12   8   6  -53.29   44.10
 -12   8   6    3.50    1.30
 -12  -8   6    4.50    2.00
  12  -8  -6  -13.40   61.89
  12  -8  -6   11.20   12.40
 -10   8   4  440.26   65.99
  10   8  -4  497.65   37.70
 -10   8   4  475.45   37.80
 -10   8   4  514.95   39.60
 -10  -8   4  513.45   37.90
  10  -8  -4  409.66   39.70
  10  -8  -4  504.85   73.89
  -8   8   2    1.60    1.00
  -8   8   2    4.20    4.50
   8   8  -2    1.10    0.80
  -8   8   2   12.30   33.90
  -8  -8   2    2.00    1.20
   8  -8  -2    2.00    5.30
  -6   8   0  830.42   58.79
  -6   8   0  722.23   77.19
   6   8   0  685.23   57.39
   6   8   0  759.22   57.49
  -6   8   0  738.43   57.49
  -6  -8   0  697.03   59.19
   6  -8   0  674.83   58.89
   6  -8   0  824.42   84.89
  -4   8  -2   11.60   37.30
   4   8   2    4.10    2.60
  -4   8  -2    7.80    1.20
   4  -8   2   -1.70    5.10
  -4  -8  -2   -4.00   20.60
   4  -8   2    4.70    5.40
   2   8   4  443.16   60.49
  -2   8  -4  476.15   65.09
   2   8   4  553.24   41.30
  -2   8  -4  547.75   41.30
   2   8   4  571.84   41.20
  -2  -8  -4  636.74   64.39
  -2  -8  -4  484.15   42.30
   2  -8   4  458.15   41.30
   2  -8   4  557.34   43.20
   0   8  -6    2.00   42.10
   0   8   6    2.00    0.70
   0   8  -6    3.20    1.10
   0   8  -6  -28.20   48.80
   0   8   6   -0.20    1.10
   0   8   6   14.70   36.90
   0   8   6   -0.50    4.90
   0  -8   6    3.50    1.60
   0  -8   6    5.20    1.50
   0  -8  -6  -21.10   41.60
   0  -8   6   -3.90    6.50
   0  -8   6    5.90    6.30
   0  -8  -6    0.70    4.10
   2   8  -8  254.77   60.19
   2   8  -8  305.87   23.20
  -2   8   8  284.07   23.20
  -2   8   8  315.07   23.10
  -2  -8   8  278.97   23.30
  -2  -8   8  293.57   23.40
  -2  -8   8  291.67   26.90
  -4   8  10   13.20    2.10
  -4   8  10   11.70   65.49
  -4   8  10   12.40    2.00
   4   8 -10   16.10    2.30
  -4  -8  10   19.20    2.40
   4  -8 -10   -2.10   75.29
  -4  -8  10   17.30    2.50
  -4  -8  10   16.10   10.00
   6   8 -12  149.39   11.50
  -6   8  12  136.49   11.60
  -6  -8  12  144.69   12.00
  -6  -8  12  135.89   11.70
  -8   8  14   39.30    5.10
   8   8 -14   43.00    4.50
  -8  -8  14   27.20    5.30
  -8  -8  14   49.00    5.20
 -10   8  16   54.59    5.70
  10   8 -16   53.29    5.40
 -10  -8  16   47.50    6.50
 -10  -8  16   42.80    6.70
 -12   8  18    5.20    3.60
 -12  -8  18   -0.30    5.20
 -14   8  20   19.10    5.50
 -23   9  17  166.48   14.80
 -21   9  15    8.70    3.50
 -21   9  15   11.40    2.60
 -21  -9  15   15.10    4.80
 -19   9  13   38.00    4.90
 -19   9  13   40.30    4.10
 -19  -9  13   29.30    5.10
 -17   9  11   19.70    2.80
  17   9 -11   27.30    8.40
 -17   9  11   18.30    2.80
 -17  -9  11   21.10    6.40
 -17  -9  11   19.80    4.00
 -15   9   9    0.30    1.80
 -15   9   9    1.00   71.49
  15   9  -9    2.80    4.60
  15   9  -9    2.50    1.10
  15  -9  -9    4.50   89.59
 -15  -9   9    3.40    4.10
 -15  -9   9    0.30    2.80
 -13   9   7  587.94   98.49
  13   9  -7  587.04   44.30
 -13   9   7  543.35   44.40
  13  -9  -7  756.32  112.49
 -13  -9   7  547.05   44.60
 -11   9   5  253.57   55.49
  11   9  -5  293.77   22.90
 -11   9   5  300.97   23.10
 -11   9   5  313.07   26.00
  11  -9  -5  255.87   26.10
 -11  -9   5  295.97   23.20
  11  -9  -5  270.77   63.59
  -9   9   3   76.69   42.20
   9   9  -3  123.29    9.60
  -9   9   3  139.69   13.60
  -9   9   3  110.69    9.80
  -9  -9   3  129.89    9.90
   9  -9  -3  -14.80   49.30
   9  -9  -3  105.29   14.00
  -7   9   1  601.94   81.79
  -7   9   1  683.03   55.09
   7   9  -1  682.43   54.99
  -7   9   1  755.52   56.49
   7  -9  -1  726.23   88.89
   7  -9  -1  627.54   56.59
  -7  -9   1  789.92   55.09
  -5   9  -1    0.50    1.00
  -5   9  -1  -22.40   39.70
  -5   9  -1   10.90   34.20
   5   9   1    4.50    1.70
   5   9   1    2.60    0.90
   5  -9   1    5.80    5.40
  -5  -9  -1  -16.20   12.70
  -5  -9  -1   -3.60   10.70
   5  -9   1    0.00    5.80
   3   9   3  117.09    8.70
   3   9   3  112.19    8.50
   3   9   3  128.49   31.10
  -3   9  -3  116.29   47.20
  -3   9  -3   76.89   39.00
   3  -9   3   85.09   12.70
   3  -9   3   93.99   18.10
  -3  -9  -3  102.79   10.10
  -1   9  -5  380.86   69.39
   1   9   5  407.76   29.90
   1   9   5  351.56   63.79
  -1   9  -5  399.76   30.10
  -1   9  -5  385.66   74.89
   1   9   5  401.56   30.10
   1  -9   5  393.06   30.20
  -1  -9  -5  331.07   31.10
  -1  -9  -5  369.26   68.69
   1  -9   5  420.46   32.80
   1  -9   5  321.17   32.80
   1   9  -7  263.87   20.50
   1   9  -7  282.57   61.09
  -1   9   7  254.47   20.50
  -1   9   7  277.07   20.40
  -1   9   7  237.38   56.59
  -1  -9   7  249.58   20.70
  -1  -9   7  267.27   20.60
  -1  -9   7  238.08   24.30
   1  -9  -7  234.28   64.09
  -3   9   9  804.02   66.79
   3   9  -9  814.82   66.69
  -3  -9   9  968.90   69.79
  -3  -9   9  812.62   66.89
  -3  -9   9  876.11   66.79
   5   9 -11   58.39    5.00
  -5   9  11   45.70    5.10
  -5   9  11   55.19    5.00
  -5  -9  11   61.79    5.50
  -5  -9  11   48.80    5.70
   7   9 -13   11.20    2.30
  -7   9  13   12.90    4.10
  -7  -9  13   15.10    3.20
  -7  -9  13   10.10    2.80
  -9   9  15   -0.60    2.40
   9   9 -15   -1.30    2.10
  -9  -9  15   -0.80    3.30
 -11   9  17   77.49    8.00
  11   9 -17   84.29    7.60
 -11  -9  17   70.49    8.90
 -13   9  19   78.09    9.00
 -22  10  16    8.60    6.60
 -22 -10  16    0.90    5.80
 -20  10  14  136.09   13.10
 -20 -10  14  173.38   14.30
 -18  10  12   16.90    2.30
 -18  10  12   13.00    2.90
 -18 -10  12   13.20    4.50
 -16  10  10  122.59    9.60
 -16 -10  10   95.59   10.60
 -14  10   8  403.66   31.30
  14  10  -8  437.66   31.10
 -14 -10   8  343.07   31.60
 -12  10   6   12.70   56.09
  12  10  -6   49.10    4.20
 -12  10   6   49.60    4.60
  12 -10  -6  113.09   72.89
 -12 -10   6   43.40    5.30
 -10  10   4 1699.13  142.19
  10  10  -4 1783.62  142.09
 -10  10   4 1762.92  165.68
  10 -10  -4 2137.19  178.28
 -10 -10   4 1861.21  142.19
  -8  10   2   37.60   42.90
   8  10  -2   30.30    3.10
  -8  10   2   33.30    3.30
   8  10  -2   35.10    3.10
  -8 -10   2   35.70    3.50
   8 -10  -2   21.20   55.09
  -6  10   0  -17.00   43.00
   6  10   0    2.80    1.00
   6  10   0    1.70    1.00
  -6 -10   0    2.70    1.30
   6 -10   0   -0.40    7.10
   4  10   2    1.20    2.50
   4  10   2    5.10    1.00
  -4  10  -2   12.90   41.80
   4  10   2    3.60    2.90
  -4 -10  -2   12.20   21.60
   4 -10   2    1.90    6.80
  -4 -10  -2   -1.60   17.90
  -2  10  -4  576.34   80.39
   2  10   4  511.55   42.20
   2  10   4  553.44   67.19
  -2  10  -4  535.15   42.20
   2  10   4  602.14   42.10
  -2 -10  -4  412.66   69.29
   2 -10   4  520.75   44.60
   0  10  -6  521.45   92.29
   0  10   6  622.24   50.09
   0  10   6  664.83   49.99
   0  10   6  579.94   87.89
   0  10  -6  621.24   50.09
   0 -10   6  651.93   52.69
   0 -10  -6  721.43   96.69
   0 -10   6  657.13   50.29
   2  10  -8  557.34   43.60
  -2  10   8  640.44   43.40
  -2  10   8  364.96   80.69
   2  10  -8  493.75   89.89
  -2  10   8  523.25   43.60
   2 -10  -8  548.05   93.89
  -2 -10   8  517.15   43.80
  -2 -10   8  583.84   47.20
  -4  10  10  127.89   10.20
   4  10 -10  131.79   10.10
  -4 -10  10  107.89   10.60
  -6  10  12  292.47   23.00
   6  10 -12  288.47   23.00
  -6 -10  12  287.77   23.40
   8  10 -14    2.00    2.10
  -8  10  14   -0.50    2.40
  -8 -10  14   -2.30    3.30
 -10  10  16    2.90    2.90
  10  10 -16    8.10    2.70
 -10 -10  16    1.90    4.30
 -12  10  18   22.90    4.50
 -21  11  15    2.30    2.80
 -21 -11  15   -4.30    5.70
 -19  11  13    7.10    2.50
 -19  11  13   11.70    3.30
 -19 -11  13   10.30    5.20
 -17  11  11    7.00    2.00
 -17  11  11    1.30    2.60
 -17 -11  11    4.50    4.30
 -15  11   9  159.38   12.90
 -15 -11   9  148.69   13.70
  13  11  -7  292.57   22.80
 -13  11   7  290.37   23.10
 -13 -11   7  286.47   23.40
 -11  11   5    0.80   58.89
 -11  11   5   43.00    4.50
  11 -11  -5   51.49   78.79
 -11 -11   5   45.40    5.00
  -9  11   3    2.70    1.50
   9  11  -3    2.80    1.20
  -9  11   3  -13.20   53.99
   9  11  -3    2.00    1.30
  -9 -11   3    1.50    1.90
   9 -11  -3   47.50   93.29
   7  11  -1  332.67   26.50
  -7  11   1  334.57   26.70
   7  11  -1  353.36   26.60
  -7  11   1  278.07   61.79
   5  11   1  150.58   12.90
  -5  11  -1  168.88   13.00
  -5  11  -1   97.69   53.19
   5  11   1  174.18   12.90
   5 -11   1  153.98   17.90
  -3  11  -3    4.80    1.40
  -3  11  -3   17.20   48.40
   3 -11   3   -1.40    8.20
  -3 -11  -3  -33.40   25.40
   1  11   5   60.79    5.20
   1  11   5   30.40   44.80
  -1  11  -5   59.99    5.40
   1  11   5   64.69    5.40
  -1  11  -5   75.49   58.59
  -1 -11  -5   70.59   49.99
   1 -11   5   80.19   14.40
   1  11  -7  207.58   15.70
  -1  11   7  200.78   64.49
  -1  11   7  182.38   15.70
  -1 -11   7  191.28   16.10
  -1 -11   7  213.88   22.50
   1 -11  -7  194.78   79.19
   3  11  -9  395.66   30.30
  -3  11   9  372.66   30.20
  -3 -11   9  381.76   30.60
   5  11 -11    3.80    1.80
  -5  11  11    3.20    2.00
  -5 -11  11    3.80    3.10
  -7  11  13    1.30    2.20
   7  11 -13    7.80    2.20
  -7 -11  13    5.10    3.60
   9  11 -15   63.29    6.50
  -9  11  15   59.39    6.60
  -9 -11  15   66.69    8.10
 -11  11  17   88.09    8.90
 -20  12  14    8.00    2.90
 -20 -12  14   -1.90    6.00
 -18  12  12  161.48   13.60
 -18  12  12  177.18   14.20
 -18 -12  12  158.88   15.50
 -16  12  10   57.69    6.10
 -16 -12  10   55.09    8.20
  14  12  -8    5.80    1.70
 -14 -12   8    6.70    3.90
 -12  12   6   66.89    6.30
 -12 -12   6   66.59    7.00
  10  12  -4   16.80    2.30
  10  12  -4   21.30    2.50
 -10  12   4   15.90    2.50
 -10 -12   4   21.80    3.00
   8  12  -2  106.89    8.50
   8  12  -2  103.59    8.70
  -8  12   2  104.39    8.70
  -8  12   2   -0.30   57.99
   8 -12  -2   44.00   83.99
   6  12   0  316.87   26.50
  -6  12   0  397.76   67.29
  -6  12   0  335.97   26.70
   6  12   0  344.67   26.60
   6 -12   0  354.06   31.40
  -4  12  -2   27.80    3.20
   4  12   2   31.10    3.20
   4  12   2   29.80    3.10
   4 -12   2   35.90   10.10
  -2  12  -4  498.85   92.59
   2  12   4  346.37   64.89
   2  12   4  424.16   30.60
  -2  12  -4  374.46   30.70
   2  12   4  361.36   30.70
   2 -12   4  403.86   36.00
   0  12   6   19.60    2.70
   0  12  -6   15.90    2.40
   0  12   6   21.30    2.60
   0  12   6   25.70   58.79
   0 -12  -6   25.60   70.59
   2  12  -8    2.10    1.80
  -2  12   8    1.20    1.70
  -2 -12   8    1.60    2.80
  -4  12  10   71.09    6.70
   4  12 -10   74.99    6.70
  -4 -12  10   73.89    7.90
   6  12 -12   96.89    8.40
  -6  12  12   94.59    8.50
  -6 -12  12   98.59    9.80
  -8  12  14   68.39    7.10
  -8 -12  14   87.69   11.20
 -10  12  16   54.99    6.90
 -21  13  15  118.49   10.90
 -19  13  13  110.49    9.70
 -19 -13  13  104.09   13.00
 -17  13  11   30.70    4.30
 -17  13  11   29.70    4.20
 -17 -13  11   24.80    6.10
 -15  13   9  176.68   15.10
 -15 -13   9  188.78   16.20
  13  13  -7   58.99    5.90
 -13  13   7   64.19    6.20
  13  13  -7   57.99    5.50
 -13 -13   7   61.29    7.30
  11  13  -5   42.40    4.20
  11  13  -5   43.30    4.60
 -11  13   5   46.40    4.90
 -11 -13   5   47.00    5.80
   9  13  -3  168.68   13.90
   9  13  -3  169.08   13.90
  -9  13   3  165.68   14.10
  -9 -13   3  192.58   14.30
  -7  13   1    2.50    1.80
   7  13  -1    2.60    1.50
   7  13  -1    0.70    1.50
   5  13   1  469.45   37.80
  -5  13  -1  493.25   37.90
   5  13   1  482.95   37.80
   3  13   3  347.57   28.40
  -3  13  -3  352.36   28.50
   3  13   3  383.36   28.50
   1  13   5    4.20    1.70
  -1  13   7   24.70    3.60
   1  13  -7   33.50    3.70
   3  13  -9   -0.20    2.00
  -3  13   9    0.50    2.00
  -3 -13   9    0.50    3.40
  -5  13  11   13.00    2.70
   5  13 -11    9.50    2.60
  -5 -13  11   17.50    4.30
   7  13 -13  143.39   11.30
  -7  13  13  118.19   12.40
  -7 -13  13  128.39   12.50
 -18  14  12    1.90    3.80
 -18  14  12    6.40    3.20
 -18 -14  12   -0.40    6.50
  16  14 -10   52.09    6.70
 -16  14  10   61.99    7.00
 -16  14  10   61.89    6.00
 -16 -14  10   60.59    9.70
  14  14  -8    0.60    2.70
 -14  14   8   -1.50    2.80
 -14 -14   8   -2.50    4.50
  12  14  -6    4.00    2.00
 -12  14   6    8.90    2.60
 -10  14   4   54.79    6.30
  10  14  -4   65.09    6.10
  10  14  -4   69.89    5.90
 -10 -14   4   76.39    7.20
  -8  14   2   18.50    2.60
   8  14  -2   13.80    2.20
   8  14  -2   12.50    2.20
   6  14   0  118.39   10.30
  -6  14   0  133.09   10.50
   6  14   0  126.69   10.30
   4  14   2    2.70    1.80
  -4  14  -2   -1.40    1.90
   2  14   4    5.30    1.90
   2  14   4    6.80    1.90
  -2  14  -4    6.60    2.00
   0  14  -6   68.19    6.00
   0  14   6   61.29    5.90
   2  14  -8   18.40    2.90
  -2  14   8   21.40    2.90
   4  14 -10   75.69    6.90
  -4  14  10   68.89    6.80
  -6  14  12    1.30    2.90
   6  14 -12    7.00    2.90
  -6 -14  12    5.70    4.80
  17  15 -11   18.40    4.20
 -17  15  11    9.80    4.10
 -17  15  11    9.60    3.20
 -17 -15  11   10.50    7.10
 -15  15   9   38.60    4.90
  15  15  -9   29.70    4.60
 -15 -15   9   47.20    7.00
 -13  15   7   74.29    6.80
  13  15  -7   61.49    6.40
  13  15  -7   49.60    6.50
 -13 -15   7   52.09    8.70
 -11  15   5  100.29    9.20
  11  15  -5  105.99    8.70
  11  15  -5   92.49    8.90
 -11 -15   5  110.29   10.20
  -9  15   3   73.79    6.70
   9  15  -3   72.49    7.70
   9  15  -3   60.89    6.20
   7  15  -1   11.60    2.40
   7  15  -1   16.30    2.30
  -7  15   1   14.00    2.60
   5  15   1   69.69    6.30
   5  15   1   73.29    6.30
  -5  15  -1   65.39    6.50
   3  15   3    8.00    2.30
   3  15   3    3.90    2.00
  -3  15  -3    6.40    2.30
   1  15   5   45.10    4.80
   1  15  -7   11.80    2.70
  -1  15   7   11.50    2.50
   5  15 -11   93.09    8.40
  -5  15  11   80.89    8.10
 -14  16   8   70.89    8.00
  12  16  -6   44.60    5.90
 -12  16   6   50.49    6.20
  12  16  -6   47.70    5.40
 -12 -16   6   48.70    6.70
 -10  16   4    4.20    3.00
  10  16  -4    2.80    2.60
  10  16  -4    2.50    2.40
   8  16  -2  240.38   18.80
   8  16  -2  226.78   19.20
  -8  16   2  233.88   19.00
   6  16   0   72.69    6.60
  -6  16   0   70.49    6.80
   6  16   0   70.89    6.70
   4  16   2   37.10    4.50
  -4  16  -2   39.80    4.90
  -2  16  -4  136.09   11.70
   2  16   4  139.29   11.50
   0  16   6    5.20    4.10
  -2  16   8  124.99   11.00
   2  16  -8  131.69   11.00
  13  17  -7    8.80    3.90
 -13  17   7    6.00    4.70
 -13 -17   7    6.40    6.50
  11  17  -5   -0.10    2.90
 -11  17   5    2.80    3.50
  11  17  -5    1.10    3.10
  -9  17   3   41.00    5.60
   9  17  -3   36.30    5.30
   9  17  -3   37.70    5.10
   7  17  -1   32.40    4.40
   7  17  -1   27.80    4.50
  -7  17   1   26.80    4.90
   5  17   1  208.78   16.90
  -5  17  -1  206.28   17.10
   3  17   3   14.80    3.10
   1  17   5   10.40    2.90
  -1  17  -5   11.00    3.10
  10  18  -4   36.10    6.10
  10  18  -4   39.80    5.80
   8  18  -2   32.80    4.20
   6  18   0   31.30    4.00
   4  18   2    9.10    3.70
 -26   0  19   -0.80    4.30
 -24   0  17   -3.60    3.40
 -22   0  15    1.40    3.30
 -20   0  13   -1.00   10.00
  20   0 -13   -2.80   10.30
 -20   0  13    0.20    2.10
  18   0 -11   -3.60    7.70
  18   0 -11    0.30   60.09
 -18   0  11  -30.20   52.59
 -18   0  11   -0.80    7.00
 -18   0  11   -0.50    1.70
 -16   0   9    0.80    5.10
 -16   0   9    0.10    1.30
 -16   0   9   -7.80   39.20
  16   0  -9   -2.70    7.10
  16   0  -9  -23.90   43.90
 -14   0   7    1.80    0.70
 -14   0   7    0.40   28.80
 -14   0   7    0.00    3.90
  14   0  -7   12.40   31.20
  14   0  -7    3.30    4.70
 -14   0   7   -0.40    1.10
  12   0  -5    2.00    0.70
 -12   0   5  -16.40   24.60
  12   0  -5    3.00    3.80
  12   0  -5   -3.50   25.30
 -12   0   5    0.80    0.80
 -12   0   5    0.70    3.20
  10   0  -3  -19.00   20.50
 -10   0   3   -2.40   20.90
  10   0  -3    2.20    0.70
 -10   0   3   -0.50    0.60
 -10   0   3   -1.70    2.60
  -8   0   1   -1.20    2.50
   8   0  -1    3.00    3.10
   8   0  -1    0.20    0.80
   8   0  -1    0.90   20.00
  -8   0   1    0.70    0.60
  -8   0   1   -4.90   18.80
  -6   0  -1   10.20   19.40
  -6   0  -1    9.70   21.30
  -4   0  -3    1.40   23.10
   4   0   3   -1.50    0.90
  -4   0  -3    1.90    3.00
   4   0   3   -4.00   25.10
  -4   0  -3   -1.50    0.60
  -4   0  -3   -1.30    0.40
   4   0   3   -2.20    3.00
  -2   0  -5   -0.30    3.30
  -2   0  -5   -0.60    0.40
  -2   0  -5    4.40   29.70
   2   0   5   -1.50    1.00
   2   0   5   -3.80   27.50
   2   0   5   -0.70    3.60
   0   0  -7    3.40    4.20
   0   0   7    4.80    5.50
   0   0  -7   -4.60   35.60
   0   0   7    3.10    1.30
   0   0   7   12.10   35.90
   2   0  -9   21.40   55.79
  -2   0   9   15.30   45.10
  -4   0  11    0.80    1.20
  -4   0  11   -1.00    1.50
   4   0 -11    1.10    6.90
   4   0 -11   20.00   60.79
  -4   0  11    0.60   64.29
  -4   0  11   10.40    8.80
  -6   0  13   -5.30   11.90
   6   0 -13    5.20   85.09
  -6   0  13   27.00   83.59
  -6   0  13    0.80    1.60
  -6   0  13    1.60    1.90
   6   0 -13    2.30    9.10
  -8   0  15  -25.40  117.09
  -8   0  15    2.20    2.00
  -8   0  15    1.00   17.50
   8   0 -15   10.40   12.80
  -8   0  15   -0.70    2.30
   8   0 -15  -89.89  121.59
 -10   0  17    2.00    2.60
 -10   0  17   -0.80    3.00
 -12   0  19    2.80    4.10
 -12   0  19   -1.40    3.30
 -25   1  18    0.40    4.00
 -25  -1  18    0.70    3.80
 -23   1  16    2.30    2.90
 -23  -1  16    6.20    3.10
 -21   1  14  300.57   23.40
 -21  -1  14  284.97   23.50
 -19   1  12   35.70    3.80
 -19   1  12   10.10   67.79
  19   1 -12   53.89   10.40
 -19   1  12   29.40    9.60
 -19  -1  12   24.50    8.40
  19  -1 -12   29.00   10.30
  19  -1 -12  -13.80   77.19
 -19  -1  12   25.20    4.00
 -17   1  10   79.29   11.50
  17   1 -10   25.10   49.90
 -17   1  10  -14.80   46.40
 -17   1  10   73.39    6.10
  17   1 -10   68.29   11.60
  17  -1 -10  101.19   55.69
  17  -1 -10   76.09   12.60
 -17  -1  10   61.89    6.10
 -17  -1  10   75.79   11.00
  15   1  -8   -2.50   34.40
 -15   1   8    5.10    1.20
  15   1  -8    5.60    5.10
 -15   1   8    6.40    4.90
 -15   1   8  -21.80   34.40
 -15  -1   8    5.60    4.30
 -15  -1   8   11.30   33.30
  15  -1  -8    2.60    5.70
 -15  -1   8    3.80    1.40
  15  -1  -8  -18.30   40.50
  13   1  -6   29.90   27.60
 -13   1   6   45.00    6.80
 -13   1   6   45.30    3.70
  13  -1  -6   37.80    7.10
 -13  -1   6   43.10    6.20
  13  -1  -6   74.49   31.20
 -13  -1   6   44.00    3.40
 -13  -1   6   56.89   27.10
 -13  -1   6   34.50    3.80
  11   1  -4 1259.67  103.09
 -11   1   4 1322.27  103.09
  11   1  -4 1347.07  102.19
  11   1  -4 1426.76  112.09
 -11   1   4 1233.68  102.29
 -11  -1   4 1292.77  102.29
 -11  -1   4 1360.56  102.99
  11  -1  -4 1155.28  103.19
 -11  -1   4 1257.97  115.29
  11  -1  -4 1452.05  102.29
  -9   1   2  345.37   26.10
  -9   1   2  321.37   25.10
  -9   1   2  228.88   39.80
   9   1  -2  303.77   26.00
   9   1  -2  310.67   25.10
   9  -1  -2  318.97   26.50
   9  -1  -2  316.07   25.10
  -9  -1   2  371.26   26.00
  -9  -1   2  226.28   38.10
   9  -1  -2  330.57   43.60
  -9  -1   2  329.47   25.10
  -7   1   0   52.09    4.30
  -7   1   0   45.90   20.90
   7   1   0   66.59    6.20
   7   1   0   51.29    4.50
   7   1   0   41.70    6.00
   7  -1   0   50.79    4.50
  -7  -1   0   67.59   20.10
   7  -1   0   50.59    6.60
  -7  -1   0   58.29    4.30
  -7  -1   0   41.10   20.60
   7  -1   0   65.79   24.80
   5   1   2  356.06   27.30
  -5   1  -2  344.07   43.40
   5   1   2  350.26   28.30
  -5   1  -2  315.37   43.20
   5   1   2  314.77   27.10
  -5   1  -2  329.67   27.10
   5   1   2  401.76   28.20
  -5  -1  -2  360.06   27.10
  -5  -1  -2  402.36   43.80
  -5  -1  -2  393.86   42.30
   5  -1   2  333.07   28.30
   5  -1   2  313.07   28.30
  -3   1  -4  348.77   26.80
  -3   1  -4  380.26   48.30
   3   1   4  337.47   47.80
   3   1   4  359.16   28.00
  -3   1  -4  335.77   28.00
  -3  -1  -4  313.17   46.60
   3  -1   4  274.87   49.60
   3  -1   4  362.16   28.20
  -3  -1  -4  303.07   27.80
   3  -1   4  358.36   27.00
  -1   1  -6  261.37   22.70
   1   1   6  299.37   21.40
  -1   1  -6  322.47   53.89
  -1   1  -6  293.77   21.20
   1   1   6  263.27   24.80
   1   1   6  255.17   21.20
   1   1   6  219.38   43.10
  -1  -1  -6  245.98   22.60
  -1  -1  -6  339.77   52.49
   1  -1   6  291.47   21.20
  -1  -1  -6  243.48   21.10
   1  -1   6  284.07   53.39
  -1   1   8   17.30   42.10
  -1   1   8   79.99    6.70
  -1   1   8   79.99    6.40
   1   1  -8   66.79   51.19
  -1   1   8  114.59   16.20
   1   1  -8   78.69    9.80
  -1  -1   8   82.69    6.80
  -1  -1   8   81.69   44.80
  -1  -1   8   73.89    6.50
   1  -1  -8    6.10   43.30
  -1  -1   8   94.39   11.00
   1  -1  -8   71.39    9.70
  -3   1  10  204.18   62.09
  -3   1  10  222.78   17.20
  -3   1  10  231.38   17.00
   3   1 -10  248.38   64.69
   3   1 -10  180.78   20.10
  -3   1  10  235.08   21.30
   3  -1 -10  198.18   19.70
  -3  -1  10  279.87   62.09
   3  -1 -10  307.87   65.79
  -3  -1  10  228.28   17.30
  -3  -1  10  184.08   17.00
  -3  -1  10  243.18   21.40
  -5   1  12  443.16   34.60
  -5   1  12  456.15   34.70
  -5   1  12  466.25   85.69
   5   1 -12  400.36   37.80
  -5   1  12  523.45   39.30
   5   1 -12  535.45   92.09
  -5  -1  12  445.96   88.69
  -5  -1  12  420.36   34.60
   5  -1 -12  368.56   37.50
  -5  -1  12  459.65   34.80
   5  -1 -12  486.85   92.19
  -7   1  14  157.88   12.90
  -7   1  14  162.68   13.00
   7   1 -14  222.68  110.19
  -7   1  14  144.69  102.99
   7   1 -14  151.88   21.70
  -7   1  14  180.18   26.20
  -7  -1  14  156.48   12.90
   7  -1 -14  114.59   20.40
  -7  -1  14  216.58  102.49
  -7  -1  14  193.98   26.10
  -7  -1  14  166.28   13.10
   7  -1 -14  144.49  108.79
  -9   1  16   22.40    3.20
  -9   1  16   15.20    2.90
  -9   1  16  106.39  151.78
  -9  -1  16   19.30    2.90
   9  -1 -16   26.70  172.78
  -9  -1  16   20.60    3.30
 -11   1  18   -0.90    3.30
 -11   1  18    2.70    3.00
 -11  -1  18    2.30    3.60
 -11  -1  18    1.20    3.00
 -13  -1  20    4.00    4.00
 -26   2  19    2.20    4.40
 -26  -2  19    3.70    4.20
 -24   2  17  213.08   17.80
 -24  -2  17  216.68   18.10
 -22   2  15   42.10    5.40
 -22  -2  15   44.40    5.50
 -20   2  13   10.40   15.80
  20   2 -13   -6.60   10.40
 -20   2  13   37.00   80.29
 -20   2  13    2.70    2.10
  20  -2 -13  -67.89  113.69
 -20  -2  13    0.70    2.30
 -20  -2  13    3.90    8.90
  20  -2 -13    0.40   12.30
 -18   2  11  401.96   34.10
 -18   2  11  489.75   37.60
 -18   2  11  461.85   33.80
 -18   2  11  355.46   72.79
  18   2 -11  396.76   36.50
 -18  -2  11  456.45   36.50
  18  -2 -11  545.25   85.49
  18  -2 -11  435.96   37.80
 -18  -2  11  405.96   34.20
 -18  -2  11  351.86   80.49
 -16   2   9   76.09   10.60
 -16   2   9   37.00   43.70
  16   2  -9   65.49    9.80
 -16   2   9   65.79    5.60
 -16  -2   9   58.09    5.70
  16  -2  -9  136.49   52.49
  16  -2  -9   68.29   11.40
 -16  -2   9   52.19   39.20
  14   2  -7  252.57   22.00
 -14   2   7  174.98   47.90
  14   2  -7  283.47   48.20
 -14   2   7  252.97   20.50
  14  -2  -7  390.96   58.79
  14  -2  -7  262.17   22.70
 -14  -2   7  266.87   20.50
 -12   2   5  187.38   37.70
  12   2  -5  214.78   16.60
  12   2  -5  212.28   38.90
  12   2  -5  191.58   17.90
 -12   2   5  246.78   18.40
 -12   2   5  205.28   16.70
  12  -2  -5  201.58   18.60
 -12  -2   5  165.28   31.20
 -12  -2   5  186.48   17.70
  12  -2  -5  207.48   37.10
  12  -2  -5  229.58   16.70
 -12  -2   5  232.88   16.60
 -12  -2   5  210.68   16.80
 -10   2   3  267.47   43.60
 -10   2   3  332.97   26.00
 -10   2   3  348.07   27.10
  10   2  -3  426.66   43.00
  10   2  -3  292.47   26.00
  10   2  -3  319.47   26.90
 -10  -2   3  338.37   26.80
 -10  -2   3  294.47   55.99
  10  -2  -3  365.96   26.00
  10  -2  -3  333.27   45.70
  10  -2  -3  339.67   27.40
 -10  -2   3  317.77   26.10
  -8   2   1 2418.66  224.08
   8   2  -1 2679.13  216.88
  -8   2   1 2837.62  216.88
  -8   2   1 3052.49  217.68
   8   2  -1 2859.41  217.58
  -8  -2   1 3052.29  216.88
   8  -2  -1 2870.01  216.98
  -8  -2   1 2470.75  222.78
   8  -2  -1 2708.03  217.78
   6   2   1  230.18   19.80
  -6   2  -1  306.07   37.70
   6   2   1  247.88   18.60
  -6   2  -1  238.18   18.70
   6   2   1  225.68   18.70
  -6   2  -1  190.88   33.70
   6  -2   1  246.38   20.00
  -6  -2  -1  188.68   35.80
   6  -2   1  214.28   20.00
  -6  -2  -1  265.97   18.70
   4   2   3  175.98   13.60
  -4   2  -3  191.88   13.50
   4   2   3  105.69   29.20
   4   2   3  179.48   14.70
  -4   2  -3  212.18   38.20
  -4   2  -3  161.08   31.50
   4  -2   3  146.59   15.00
  -4  -2  -3  150.18   14.70
   4  -2   3  182.08   15.10
  -4  -2  -3  202.58   35.70
  -2   2  -5    9.10    1.00
  -2   2  -5   -4.70   30.10
  -2   2  -5   11.30    4.00
   2   2   5    2.70   27.10
   2   2   5    8.10    4.40
   2   2   5    6.60    1.20
  -2  -2  -5   33.40   28.80
   2  -2   5   10.00    4.30
   2  -2   5    7.70    1.60
   2  -2   5    8.40    1.20
   2  -2   5  -10.80   32.40
  -2  -2  -5    5.60    3.40
   0   2  -7  142.59   15.40
   0   2   7  170.98   13.50
   0   2   7  193.18   16.00
   0   2  -7  170.68   13.40
   0   2   7  148.39   13.30
   0   2  -7  170.18   43.10
   0   2   7   81.19   38.80
   0  -2  -7  190.48   43.80
   0  -2  -7  175.38   13.30
   0  -2   7  159.48   47.50
   0  -2  -7  169.58   15.50
   0  -2   7  188.98   16.40
   0  -2   7  156.28   13.40
   0  -2  -7  196.18   13.30
   0  -2   7  169.58   13.70
  -2   2   9  662.23   50.39
  -2   2   9  749.62   87.99
  -2   2   9  662.73   50.29
  -2   2   9  686.83   52.49
   2   2  -9  642.24   89.19
  -2  -2   9  597.54   50.29
  -2  -2   9  733.23   52.79
  -2  -2   9  638.04   50.49
   2  -2  -9  538.25   51.79
   2  -2  -9  698.63   90.59
  -2  -2   9  440.66   87.59
   4   2 -11  428.86   81.79
  -4   2  11  344.77   28.50
  -4   2  11  389.36   28.70
   4   2 -11  335.17   31.40
  -4   2  11  451.15   74.59
  -4  -2  11  376.86   28.80
  -4  -2  11  346.57   28.60
   4  -2 -11  335.97   31.40
   4  -2 -11  321.37   78.69
  -4  -2  11  405.46   77.59
  -4  -2  11  407.86   33.10
  -6   2  13  130.89   10.20
  -6   2  13  148.69   22.10
   6   2 -13  108.69   17.90
   6   2 -13  221.88   88.79
  -6   2  13  124.79   10.40
  -6   2  13  186.38   85.19
   6  -2 -13   67.99   91.99
  -6  -2  13  119.69   20.60
   6  -2 -13  112.79   18.00
  -6  -2  13  124.59   10.30
  -6  -2  13  102.99   91.89
  -8   2  15   73.99    6.40
  -8   2  15    2.20  118.19
  -8   2  15   85.99   19.10
  -8   2  15   66.89    6.70
  -8  -2  15   74.39    6.90
  -8  -2  15   68.99    6.60
   8  -2 -15  135.89  135.19
   8  -2 -15   58.29   15.30
 -10   2  17    1.20    2.70
 -10   2  17   -1.20    2.60
 -10  -2  17    3.90    2.70
 -10  -2  17    0.30    3.30
 -12   2  19   97.19    8.80
 -12  -2  19   67.99    8.40
 -25   3  18    8.70    3.90
 -25  -3  18    5.50    4.20
 -23   3  16    1.50    2.90
 -23  -3  16   -3.90    3.20
 -21   3  14  126.19   10.00
 -21  -3  14  105.09   10.20
 -19   3  12    6.00    1.10
 -19   3  12   12.80   10.60
 -19   3  12   50.79   69.39
 -19   3  12    3.40    2.00
  19   3 -12   15.90    9.00
 -19  -3  12    3.80    2.20
  19  -3 -12  -11.60   10.20
 -19  -3  12    8.30    7.80
 -17   3  10    3.30    7.80
  17   3 -10    6.40    6.10
 -17   3  10    5.20    1.50
 -17   3  10  -22.50   53.99
  17   3 -10  -32.30   47.10
 -17  -3  10   -1.70   45.60
  17  -3 -10  -31.60   61.69
  17  -3 -10    4.00    8.20
 -17  -3  10   -0.70    1.80
 -17  -3  10    4.40    5.20
  15   3  -8   54.59   33.80
 -15   3   8   43.60    7.40
 -15   3   8   26.60    3.00
 -15   3   8   10.70   37.80
  15  -3  -8   37.00    7.90
 -15  -3   8   23.10   33.60
 -15  -3   8   33.40    6.70
 -15  -3   8   29.60    3.40
  15  -3  -8  100.39   47.60
 -13   3   6   95.79   35.60
  13   3  -6  196.78   31.50
 -13   3   6  150.18   14.10
 -13   3   6  133.59   11.60
  13   3  -6  136.99   13.10
  13   3  -6  159.68   11.40
 -13  -3   6  104.09   28.80
 -13  -3   6  157.68   13.00
 -13  -3   6  148.39   11.70
  13  -3  -6  123.49   14.30
  13  -3  -6  206.88   40.30
  11   3  -4  286.57   39.20
 -11   3   4  328.07   25.10
  11   3  -4  288.27   23.60
 -11   3   4  302.57   23.70
 -11   3   4  272.97   47.00
  11  -3  -4  324.77   23.70
  11  -3  -4  355.86   49.60
 -11  -3   4  288.67   23.80
 -11  -3   4  251.27   37.70
  11  -3  -4  285.37   25.30
 -11  -3   4  307.77   24.50
  -9   3   2  315.07   25.70
  -9   3   2  309.07   24.70
   9   3  -2  307.47   38.70
   9   3  -2  301.97   24.70
  -9   3   2  247.88   43.40
  -9  -3   2  311.07   24.70
   9  -3  -2  283.47   26.00
   9  -3  -2  345.77   24.80
  -9  -3   2  277.57   36.90
  -9  -3   2  347.17   25.40
   9  -3  -2  401.86   47.90
  -7   3   0   90.09    8.50
  -7   3   0   81.49    6.70
  -7   3   0   96.19   25.10
   7   3   0   88.09    7.90
   7   3   0   74.29   10.30
   7   3   0   89.29    6.70
   7  -3   0   97.39   26.80
   7  -3   0   69.79    8.90
  -7  -3   0   92.19    6.70
  -7  -3   0   56.79   20.90
  -7  -3   0   48.40   20.50
   7  -3   0   78.39    6.80
  -5   3  -2  948.91   86.79
  -5   3  -2  879.01   85.99
   5   3   2  974.90   73.69
   5   3   2  990.00   74.39
  -5   3  -2  925.31   73.59
   5  -3   2  928.61   74.69
   5  -3   2  872.61   73.79
  -5  -3  -2 1035.30   84.69
  -3   3  -4  239.28   35.90
   3   3   4  153.28   33.20
   3   3   4  219.18   15.30
  -3   3  -4  174.98   15.20
   3   3   4  211.88   16.60
  -3   3  -4  217.58   39.00
   3  -3   4  189.28   15.50
  -3  -3  -4  163.48   16.40
   3  -3   4  205.48   17.20
  -1   3  -6   51.29    7.80
  -1   3  -6  102.59   46.00
   1   3   6   62.29    8.30
   1   3   6   42.30   32.70
   1   3   6   56.29    4.70
  -1   3  -6   60.29    4.50
   1  -3   6   62.19    8.70
   1  -3   6   51.19    5.00
   1  -3   6   52.99    4.70
  -1  -3  -6   80.29   40.10
   1  -3   6   64.99   40.30
  -1  -3  -6   49.90    7.30
  -1   3   8   39.60   41.50
  -1   3   8   77.09    5.90
  -1   3   8   75.29    6.20
   1   3  -8   66.99   48.20
   1   3  -8   75.59   10.10
   1   3  -8   85.69    6.00
  -1   3   8   76.89   10.30
  -1  -3   8  103.89   49.20
   1  -3  -8   65.99    5.90
  -1  -3   8   85.19   11.90
  -1  -3   8   69.89    6.10
  -1  -3   8   69.09    6.50
   1  -3  -8   68.09    9.50
   1  -3  -8  139.49   49.80
  -3   3  10  222.68   18.00
  -3   3  10  248.18   21.90
  -3   3  10  256.67   17.80
   3   3 -10  179.48   64.09
  -3   3  10  154.48   60.69
   3   3 -10  199.08   20.80
  -3  -3  10  219.38   18.00
   3  -3 -10  317.17   68.29
   3  -3 -10  194.38   20.70
  -3  -3  10  226.48   18.20
  -3  -3  10  247.48   22.40
  -3  -3  10  234.18   68.29
   5   3 -12  352.86   34.40
  -5   3  12  390.06   30.90
  -5   3  12  418.46   36.30
  -5   3  12  406.56   31.00
   5   3 -12  317.37   90.49
  -5   3  12  373.46   84.09
  -5  -3  12  329.17   86.49
   5  -3 -12  360.86   94.59
  -5  -3  12  400.66   31.10
  -5  -3  12  385.36   31.00
  -5  -3  12  445.26   36.20
   5  -3 -12  368.16   34.30
  -7   3  14   18.10   15.10
   7   3 -14   20.70   12.20
  -7   3  14   41.00   94.69
  -7   3  14   18.40    2.80
  -7   3  14   16.60    2.60
  -7  -3  14   14.10    2.90
   7  -3 -14  -14.50  109.89
  -7  -3  14   17.60   15.30
  -7  -3  14   13.40    2.50
   7  -3 -14   13.80   12.20
  -9   3  16   27.20    3.80
  -9   3  16   26.50    3.50
  -9  -3  16   26.00    3.70
  -9  -3  16   16.90    3.30
 -11  -3  18   24.60    4.50
 -11  -3  18   24.00    4.00
 -13  -3  20   44.00    5.80
 -26   4  19   73.49    8.90
 -26  -4  19   79.49    9.80
 -24   4  17    4.10    3.60
 -24  -4  17    7.60    3.90
 -22   4  15   25.90    3.50
 -22  -4  15   15.10    3.60
 -20   4  13    8.50   13.70
 -20   4  13   12.60    2.40
 -20   4  13    8.90    1.50
 -20   4  13   63.39   90.19
  20  -4 -13  -14.70  114.79
  20  -4 -13   -3.60   13.30
 -20  -4  13   11.20    2.80
 -18   4  11    2.60    1.70
 -18   4  11  -18.00   63.99
 -18   4  11   -6.60   10.10
  18   4 -11   -1.10    7.00
  18  -4 -11   -0.30   10.50
  18  -4 -11   15.90   80.69
 -18  -4  11    1.90    2.10
 -16   4   9 1090.19   92.59
  16   4  -9 1256.77  113.19
 -16   4   9 1334.97   94.59
  16   4  -9 1253.27   93.79
 -16  -4   9 1243.78   93.59
 -16  -4   9 1066.09   92.99
  16  -4  -9 1222.98   94.69
 -16  -4   9  935.51  112.19
 -14   4   7  155.28   48.00
 -14   4   7  258.47   21.70
 -14   4   7  269.97   24.20
  14   4  -7  368.56   48.60
  14   4  -7  304.97   23.10
 -14  -4   7  279.17   21.90
  14  -4  -7  265.57   24.30
  14  -4  -7  366.96   64.19
 -14  -4   7  285.57   47.90
 -14  -4   7  271.07   22.80
 -12   4   5  143.89   39.00
  12   4  -5  167.08   12.40
 -12   4   5  159.38   12.50
  12   4  -5  169.88   13.80
  12   4  -5  192.98   29.70
  12  -4  -5  217.08   43.10
 -12  -4   5  144.49   12.70
  12  -4  -5  140.09   15.00
 -12  -4   5  127.69   27.10
  10   4  -3  491.75   36.80
  10   4  -3  517.25   49.50
 -10   4   3  461.55   36.90
 -10   4   3  456.15   56.29
  10   4  -3  416.56   37.50
 -10   4   3  467.95   38.00
  10  -4  -3  551.24   59.09
 -10  -4   3  547.25   37.60
  10  -4  -3  418.26   38.30
 -10  -4   3  456.15   37.00
  10  -4  -3  494.85   36.90
 -10  -4   3  414.36   47.10
   8   4  -1  264.77   23.90
   8   4  -1  299.07   23.90
   8   4  -1  300.97   23.20
  -8   4   1  324.97   24.50
  -8   4   1  294.27   44.00
   8  -4  -1  266.07   24.60
  -8  -4   1  225.08   35.30
   8  -4  -1  319.17   23.40
  -8  -4   1  312.77   23.20
  -8  -4   1  273.17   36.60
   8  -4  -1  333.67   47.00
   6   4   1  424.26   31.70
   6   4   1  363.96   31.60
  -6   4  -1  406.56   31.70
   6   4   1  420.16   32.40
  -6   4  -1  506.15   50.99
  -6  -4  -1  338.77   44.90
   6  -4   1  423.36   33.10
  -6  -4  -1  484.75   47.00
   6  -4   1  364.46   33.00
   4   4   3 1071.79   75.69
   4   4   3  936.71   87.19
  -4   4  -3  922.81   89.19
  -4   4  -3 1109.49   91.49
  -4   4  -3  997.40   74.89
   4   4   3  997.70   74.99
  -4  -4  -3  869.11   75.59
   4  -4   3  899.51   74.99
   4  -4   3  923.21   76.59
  -4  -4  -3 1081.79   87.89
   4  -4   3  833.92   75.99
   2   4   5   87.19    7.10
  -2   4  -5   64.49   36.90
   2   4   5   63.69   29.40
  -2   4  -5   85.59    7.00
   2   4   5  106.99    9.50
   2  -4   5   87.09   10.20
   2  -4   5   83.09    7.30
  -2  -4  -5   98.89    9.10
   2  -4   5   78.39    7.10
   0   4  -7 1202.48  108.99
   0   4   7 1308.07  125.19
   0   4   7 1514.05  108.69
   0   4   7 1331.57  107.39
   0   4  -7 1463.85  107.39
   0  -4  -7 1576.24  130.59
   0  -4  -7 1196.38  108.29
   0  -4   7 1345.87  107.49
   0  -4   7 1321.37  107.39
   0  -4   7 1557.24  109.09
   2   4  -9   71.39   11.20
   2   4  -9  129.89   57.79
  -2   4   9   91.99   12.40
  -2   4   9   55.09   56.79
  -2   4   9   77.29    6.50
   2   4  -9   90.09    6.40
  -2  -4   9   76.79    6.60
  -2  -4   9   62.49   57.29
  -2  -4   9   75.39   13.60
   2  -4  -9   70.99   55.39
  -2  -4   9   74.99    6.80
   2  -4  -9   75.49    6.20
   2  -4  -9   60.89   10.30
   4   4 -11   15.80    7.60
  -4   4  11   20.30    2.20
  -4   4  11    9.30    9.60
  -4   4  11   22.30    2.70
   4   4 -11   71.89   72.39
  -4   4  11   87.09   65.29
  -4  -4  11  -16.20   72.79
  -4  -4  11   19.80    2.70
  -4  -4  11   18.90    2.40
  -4  -4  11   15.50   10.50
   4  -4 -11   -8.40   74.19
  -6   4  13    4.30    1.90
  -6   4  13    3.10    1.50
  -6   4  13   14.80   16.70
   6   4 -13    8.20    9.80
  -6   4  13  -85.49   82.79
  -6  -4  13    3.90    2.00
   6  -4 -13    2.20    9.90
   6  -4 -13  -50.19  110.39
  -6  -4  13    5.60   13.00
  -8   4  15  196.88   15.90
  -8   4  15  182.38   15.70
  -8  -4  15  205.48   16.00
  -8  -4  15  199.38   16.00
 -10   4  17   57.49    6.50
 -10  -4  17   52.59    7.10
 -10  -4  17   68.29    6.90
 -12   4  19   69.39    7.50
 -12  -4  19   56.59    7.70
 -14  -4  21   20.60    5.50
 -25  -5  18    0.00    4.40
 -23   5  16   41.00    5.70
 -23  -5  16   41.70    5.50
 -21   5  14   42.00  130.59
 -21   5  14   40.30    4.10
 -21  -5  14   29.30    4.70
  21  -5 -14  115.69  172.18
 -19   5  12  154.18   87.59
 -19   5  12  212.28   23.10
 -19   5  12  185.98   13.70
  19   5 -12  137.79   18.90
 -19   5  12  170.38   14.00
 -19  -5  12  155.18   14.30
 -19  -5  12  184.98   18.50
  19  -5 -12  164.38   23.20
  19  -5 -12  266.27  107.89
 -17   5  10  404.66   33.40
  17   5 -10  430.06   35.40
 -17   5  10  428.96   79.09
 -17  -5  10  408.36   33.60
 -17  -5  10  486.45   35.10
  17  -5 -10  375.76   37.20
  17  -5 -10  689.03  115.89
  15   5  -8    8.50   33.00
 -15   5   8    5.60    2.30
  15   5  -8    8.50    4.50
 -15   5   8  -28.30   47.40
 -15   5   8    8.70    7.10
 -15  -5   8    7.40    4.20
 -15  -5   8    1.90    1.90
 -15  -5   8   33.90   33.50
  15  -5  -8    8.40    7.50
 -13   5   6  956.50  105.79
  13   5  -6 1215.68   97.59
  13   5  -6 1079.39   85.89
 -13   5   6 1105.69   86.09
  13   5  -6 1179.68   86.79
 -13   5   6 1203.58   87.49
 -13  -5   6  942.91   96.49
  13  -5  -6 1061.99   87.59
 -13  -5   6 1070.99   86.59
 -13  -5   6 1111.29   86.19
 -11   5   4  456.25   65.89
 -11   5   4  562.94   44.60
 -11   5   4  542.15   43.30
  11   5  -4  583.04   56.09
  11   5  -4  515.95   43.80
  11   5  -4  576.84   43.20
 -11  -5   4  526.15   43.80
 -11  -5   4  652.73   54.59
  11  -5  -4  609.24   69.59
  11  -5  -4  502.85   44.90
 -11  -5   4  590.04   43.50
   9   5  -2    1.60    0.70
  -9   5   2    2.50    3.70
   9   5  -2    2.00    2.60
   9   5  -2    2.30    2.30
  -9   5   2    2.90   28.30
  -9   5   2    0.80    0.80
   9  -5  -2   -0.70    4.50
   9  -5  -2   -0.20   32.00
   9  -5  -2    2.40    0.90
  -9  -5   2   -5.00   18.10
  -9  -5   2    4.10    1.20
  -9  -5   2   -2.70   16.10
   7   5   0  307.17   22.30
   7   5   0  261.87   22.40
  -7   5   0  265.07   21.60
  -7   5   0  279.07   22.90
  -7   5   0  226.18   38.60
   7   5   0  280.57   21.60
   7  -5   0  301.77   48.70
   7  -5   0  255.47   21.70
  -7  -5   0  277.87   21.60
  -7  -5   0  284.47   38.90
   5   5   2  156.78   12.80
  -5   5  -2  254.07   43.90
   5   5   2  179.48   13.90
  -5   5  -2  112.29   31.50
  -5   5  -2  162.98   12.90
   5  -5   2  161.28   13.00
   5  -5   2  137.99   15.10
  -5  -5  -2  163.58   31.20
   5  -5   2  178.38   15.20
  -3   5  -4 1394.06  103.59
  -3   5  -4 1286.67  117.49
   3   5   4 1378.06  103.59
   3   5   4 1245.68  115.59
   3  -5   4 1499.45  105.09
   3  -5   4 1306.67  103.69
  -3  -5  -4 1250.37  117.49
  -3  -5  -4 1301.27  104.39
   3  -5   4 1215.68  104.89
  -1   5  -6 1386.56  102.69
   1   5   6 1326.17  102.69
   1   5   6 1173.48  118.59
   1  -5   6 1428.86  104.29
   1  -5   6 1257.87  102.79
  -1  -5  -6 1357.36  122.49
  -1  -5  -6 1200.78  103.59
   1  -5   6 1352.06  102.79
  -1   5   8   23.40    2.50
   1   5  -8   24.10    6.30
   1   5  -8   59.09   52.79
  -1   5   8   36.10    7.10
   1   5  -8   19.90    2.20
  -1   5   8   22.80   42.30
   1  -5  -8    9.80   48.60
   1  -5  -8   16.30    5.60
  -1  -5   8   -3.40   55.59
  -1  -5   8   23.30    2.70
  -1  -5   8   15.20    7.80
  -1  -5   8   20.00    3.00
  -3   5  10   88.09   57.59
   3   5 -10   49.20   66.69
   3   5 -10   53.99   11.90
  -3   5  10   70.99    6.00
  -3   5  10   90.19   13.70
  -3   5  10   70.99    6.40
   3   5 -10   86.19    6.20
  -3  -5  10   70.49    6.50
   3  -5 -10   14.80   65.89
  -3  -5  10   45.60   71.79
   3  -5 -10   55.29   11.80
  -3  -5  10   86.89    6.80
  -5   5  12   12.60    2.10
  -5   5  12   14.90    2.10
  -5   5  12    3.60   75.39
   5   5 -12    7.70    8.70
  -5  -5  12    9.40   11.80
  -5  -5  12   14.80    2.40
   5  -5 -12  -41.00   88.79
  -5  -5  12   12.70    2.60
  -7   5  14   42.70    4.60
  -7  -5  14   42.50    5.00
  -7  -5  14   40.10    4.90
  -9   5  16  302.87   24.50
  -9  -5  16  278.77   24.60
  -9  -5  16  339.37   24.70
 -11   5  18   38.40    5.00
 -11  -5  18   41.00    6.40
 -13   5  20   32.50    5.10
 -24   6  17   -1.00    3.60
 -24  -6  17    2.20    4.40
 -22   6  15    6.40    3.00
 -22  -6  15   10.80    3.80
 -20   6  13  168.18   15.20
 -20   6  13  187.68   14.70
  20  -6 -13  207.08   30.60
 -20  -6  13  195.48   15.60
 -18   6  11    2.40    1.80
  18   6 -11    2.30    7.00
 -18   6  11  -68.29   78.89
 -18   6  11    0.50   11.50
 -18  -6  11   -2.90    2.50
  18  -6 -11  -23.40   96.89
 -18  -6  11    9.10    6.50
  16   6  -9  272.07   24.30
 -16   6   9  308.27   68.09
 -16   6   9  284.87   22.60
 -16  -6   9  300.37   24.10
  16  -6  -9  284.37   27.60
  16  -6  -9  332.67   77.39
 -16  -6   9  281.27   22.90
  14   6  -7  193.98   33.60
 -14   6   7   98.29   48.80
  14   6  -7  167.68   12.50
  14   6  -7  153.78   14.10
 -14  -6   7  143.29   13.00
 -14  -6   7  155.48   14.00
  14  -6  -7  173.58   17.60
  14  -6  -7  210.08   58.79
 -14  -6   7  145.69   33.70
 -12   6   5  333.07   55.99
  12   6  -5  445.76   32.60
  12   6  -5  526.65   50.29
 -12   6   5  376.56   32.70
 -12   6   5  462.45   34.60
  12   6  -5  451.65   33.30
 -12  -6   5  334.87   46.80
  12  -6  -5  537.35   74.49
 -12  -6   5  362.76   33.20
  12  -6  -5  408.26   35.00
 -12  -6   5  410.26   32.80
  10   6  -3   59.39    6.10
  10   6  -3   58.09    6.30
 -10   6   3   57.79    5.00
 -10   6   3   33.90   35.10
  10   6  -3   58.39    4.90
 -10   6   3   67.19    8.50
  10  -6  -3   65.09   38.60
 -10  -6   3   62.19    5.30
 -10  -6   3   48.40   17.40
  10  -6  -3   69.69    9.60
 -10  -6   3   65.39   21.50
  -8   6   1  163.28   34.80
   8   6  -1  137.09   11.00
  -8   6   1  117.39   10.20
   8   6  -1  125.19   11.00
  -8   6   1  145.39   12.30
  -8  -6   1   93.19   19.90
   8  -6  -1  130.29   13.20
  -8  -6   1  142.19   10.30
  -8  -6   1  113.29   25.00
   8  -6  -1  145.79   39.20
   8  -6  -1  114.89   10.30
  -6   6  -1    2.50    0.90
   6   6   1    5.70    0.90
   6   6   1    3.20    0.60
[truncated: 316,868 more chars]
